# Supplementary material
Source: publisher figshare collection journal article supplement (https://karger.figshare.com/articles/dataset/_/4557814)
Supplement: Supplementary file 1 [file 1]

# Additional file 1. Differently expressed gene between uni

| Probe_Set_ID        | Gene_Symbol |
|---------------------|-------------|
| Gga.1.1.S1_at       | BRCA2       |
| Gga.10.1.S1_at      | OTX2        |
| Gga.100.1.S1_a_at   | FAS         |
| Gga.10003.1.S1_at   | MKL2        |
| Gga.10004.1.S1_at   | LOC416212   |
| Gga.10008.1.S1_at   | ZNF512B     |
| Gga.10012.1.S1_s_at | SLC30A1     |
| Gga.10017.1.S1_at   | LOC777533   |
| Gga.10021.2.S1_s_at | AGL         |
| Gga.10022.1.S1_at   | PCTP        |
| Gga.10025.1.S1_at   | CHGB        |
| Gga.10026.1.S1_at   | VPS37B      |
| Gga.10027.2.S1_at   | CPSF3       |
| Gga.10029.1.S1_at   | SCRN3       |
| Gga.10032.1.A1_at   | POLR1B      |
| Gga.10033.1.S1_at   | C20orf58    |
| Gga.10034.1.S1_at   | SERPINB2    |
| Gga.10034.2.S1_a_at | SERPINB2    |
| Gga.10034.2.S1_s_at | SERPINB2    |
| Gga.10036.2.S1_a_at | DSCR2       |
| Gga.10037.1.S1_s_at | NOXO1       |
| Gga.10042.1.S1_a_at | CD200R1     |
| Gga.10045.1.S1_at   | VCP         |
| Gga.10051.1.S1_at   | RCBTB1      |
| Gga.10056.1.S1_at   | PHF20L1     |
| Gga.10057.1.S1_s_at | TCP11L1     |
| Gga.1006.1.S1_at    | TBP         |
| Gga.1006.2.S1_a_at  | TBP         |
| Gga.10060.1.S1_s_at | UBE1L2      |
| Gga.10061.1.S1_s_at | SLC16A6     |
| Gga.10062.1.S1_s_at | TTF2        |
| Gga.10065.1.S1_at   | USP54       |
| Gga.10066.1.S1_at   | MTMR7       |
| Gga.10067.1.S1_at   | KANK4       |

|                     |              |
|---------------------|--------------|
| Gga.10068.1.S1_at   | KLHDC10      |
| Gga.10069.1.S1_at   | CBFA2T3      |
| Gga.10077.1.S1_at   | WDR35        |
| Gga.10077.2.S1_s_at | WDR35        |
| Gga.10078.2.S1_x_at | LOC419724    |
| Gga.10096.1.S1_at   | FBLN5        |
| Gga.10098.1.S1_s_at | FAP          |
| Gga.10100.1.S1_at   | IFT80        |
| Gga.10103.1.S1_s_at | COBL         |
| Gga.10107.1.S1_s_at | RCJMB04_18i2 |
| Gga.10108.1.S1_at   | ANXA8        |
| Gga.10114.1.S1_s_at | RNPEPL1      |
| Gga.10114.2.S1_at   | RNPEPL1      |
| Gga.10124.1.S1_at   | SETBP1       |
| Gga.10124.2.S1_a_at | SETBP1       |
| Gga.10125.1.S1_a_at | FAIM         |
| Gga.10129.1.S1_at   | ECHDC1       |
| Gga.10131.2.S1_a_at | TM4SF4       |
| Gga.10133.1.S1_s_at | TBC1D8B      |
| Gga.10139.1.S1_at   | LOC421693    |
| Gga.10139.1.S1_s_at | LOC421693    |
| Gga.10142.1.S1_at   | DNAJC28      |
| Gga.10146.1.S1_at   | C3orf26      |
| Gga.10147.1.S1_at   | GALNT12      |
| Gga.10155.1.S1_at   | EREG         |
| Gga.10156.2.S1_a_at | ERP27        |
| Gga.1016.1.S1_s_at  | RCJMB04_34i9 |
| Gga.10167.1.S1_at   | NTS          |
| Gga.10172.1.S1_at   | RERGL        |
| Gga.10172.2.S1_at   | RERGL        |
| Gga.10176.1.S1_at   | RBPJ         |
| Gga.10176.1.S1_s_at | RBPJ         |
| Gga.10179.2.S1_a_at | STYXL1       |
| Gga.10184.1.S1_at   | CDA          |
| Gga.10185.1.S1_at   | SF3B1        |
| Gga.10186.1.S1_at   | CADM2        |
| Gga.10192.1.S1_at   | LOC415554    |
| Gga.10195.1.S1_at   | SLC18A1      |
| Gga.10198.1.S1_s_at | ASXL3        |
| Gga.10199.1.S1_s_at | TOX3         |

|                     |                         |
|---------------------|-------------------------|
| Gga.1020.1.S1_at    | CCL17                   |
| Gga.10207.1.S1_at   | MASP2                   |
| Gga.10213.1.A1_at   | LOC396417 /// LOC431393 |
| Gga.10214.1.S1_s_at | MAPK12                  |
| Gga.10220.1.S1_s_at | EZH1                    |
| Gga.10221.2.S1_a_at | ALKBH4                  |
| Gga.10223.1.S1_s_at | ABCA5                   |
| Gga.10224.1.S1_at   | TRIM65                  |
| Gga.10226.1.S1_at   | LOC418990               |
| Gga.10226.1.S1_s_at | LOC418990               |
| Gga.10227.1.S1_at   | LOC768514 /// SGMS2     |
| Gga.1023.1.S1_at    | FGA                     |
| Gga.10231.1.S1_at   | CYP8B                   |
| Gga.10238.1.S1_s_at | CDYL2                   |
| Gga.10241.1.S1_a_at | C2orf18                 |
| Gga.10252.1.S1_at   | OSMR                    |
| Gga.10254.1.S1_at   | JMJD7-PLA2G4B           |
| Gga.10256.1.S1_at   | SGSH                    |
| Gga.1026.1.S1_at    | LOC771740               |
| Gga.10262.1.S1_at   | GNAS                    |
| Gga.10263.1.S1_at   | DUSP13                  |
| Gga.10265.1.S1_s_at | STXBP4                  |
| Gga.10266.1.S1_at   | LOC429955               |
| Gga.1027.1.S1_at    | LOC422284               |
| Gga.10273.1.S1_at   | DRG1                    |
| Gga.10281.1.S1_at   | OLAH                    |
| Gga.10286.1.S1_at   | PBLD                    |
| Gga.1029.2.S1_a_at  | RBBP4                   |
| Gga.1029.3.S1_a_at  | RBBP4                   |
| Gga.10291.1.S1_at   | LOC424274               |
| Gga.10293.3.S1_a_at | LOC420991               |
| Gga.10294.1.S1_at   | CPT1A                   |
| Gga.10298.1.S1_s_at | EDEM3                   |
| Gga.103.1.S1_at     | MYH7B                   |
| Gga.10303.1.S1_at   | CAV2                    |
| Gga.10309.1.S1_s_at | GAPVD1                  |
| Gga.10313.1.S1_s_at | HS1BP3                  |
| Gga.10322.1.S1_s_at | XPO5                    |
| Gga.10323.1.A1_at   | RBM14                   |
| Gga.10323.1.S1_at   | RBM14                   |

|                     |                        |
|---------------------|------------------------|
| Gga.10324.1.S1_a_at | LOC422015              |
| Gga.10325.1.S1_s_at | LOC422765              |
| Gga.10328.1.S1_s_at | ABHD11                 |
| Gga.10329.1.S1_s_at | RBM26                  |
| Gga.10330.1.S1_at   | LOC770321              |
| Gga.1035.1.S1_at    | TGM2                   |
| Gga.10351.1.S1_s_at | C19orf12 /// LOC415755 |
| Gga.10351.2.S1_x_at | LOC415755              |
| Gga.10354.1.S1_at   | KATNA1                 |
| Gga.10362.1.S1_at   | ARL11                  |
| Gga.10370.1.S1_at   | CDC14C                 |
| Gga.10378.1.S1_at   | SNRPA1                 |
| Gga.10382.1.S1_s_at | APC                    |
| Gga.1039.1.S1_at    | ITGB3                  |
| Gga.10390.1.S1_s_at | GPR123                 |
| Gga.10392.1.S1_at   | TIMM10                 |
| Gga.10399.1.S1_s_at | SLC30A9                |
| Gga.10401.1.S1_at   | B3GALT2                |
| Gga.10405.1.S1_s_at | SNX16                  |
| Gga.10406.2.S1_s_at | CYLD                   |
| Gga.10410.1.S1_s_at | MDGA1                  |
| Gga.10415.2.S1_a_at | NOL10                  |
| Gga.10417.1.S1_at   | LOC418442              |
| Gga.1042.1.S1_at    | GHITM                  |
| Gga.10420.2.S1_a_at | CSRP2BP                |
| Gga.10422.1.S1_at   | LOC427297              |
| Gga.10425.1.S1_s_at | VSNL1                  |
| Gga.1043.1.S1_s_at  | NUDT19                 |
| Gga.10435.1.S1_s_at | WHSC1                  |
| Gga.10439.1.S1_at   | FN1                    |
| Gga.10441.1.S1_s_at | ATN1                   |
| Gga.10445.1.A1_at   | ATP6V1D                |
| Gga.10446.1.S1_at   | RNF151                 |
| Gga.10449.1.S1_at   | PEX10                  |
| Gga.1045.1.S1_at    | LOC422229              |
| Gga.10455.1.S1_at   | SEL1L                  |
| Gga.10457.1.S1_s_at | LOC423613              |
| Gga.10459.1.S1_s_at | ANKFY1                 |
| Gga.10461.2.S1_a_at | HMGCLL1                |
| Gga.10464.1.S1_at   | SLC36A4                |

|                     |                 |
|---------------------|-----------------|
| Gga.10471.1.S1_at   | TSHZ1           |
| Gga.10471.1.S1_s_at | TSHZ1           |
| Gga.10479.1.S1_s_at | CDH17           |
| Gga.10485.1.S1_at   | LOC419647       |
| Gga.10486.1.S1_s_at | POLR1A          |
| Gga.10491.1.S1_at   | EVC             |
| Gga.10492.2.S1_a_at | ELMO2           |
| Gga.10496.1.S1_at   | FAM102A         |
| Gga.10496.1.S1_x_at | FAM102A         |
| Gga.10498.1.S1_at   | CHDH            |
| Gga.105.1.S1_at     | BMPR2           |
| Gga.10500.1.S1_at   | KCTD15          |
| Gga.10508.1.S1_at   | DLX1            |
| Gga.10515.3.S1_a_at | CREBL2          |
| Gga.10518.1.A1_s_at | LRRC41          |
| Gga.10519.1.S1_at   | GPSN2           |
| Gga.10521.1.S1_s_at | GARNL1          |
| Gga.10524.1.S1_at   | DAZAP1 /// IRF4 |
| Gga.10528.2.A1_at   | PROK2           |
| Gga.10529.1.S1_at   | LOC770294       |
| Gga.10532.1.S1_at   | PABPC4          |
| Gga.10535.2.S1_a_at | CNOT1           |
| Gga.10535.2.S1_s_at | CNOT1           |
| Gga.10538.1.S1_at   | FAM38B          |
| Gga.10539.2.S1_a_at | SRFBP1          |
| Gga.10541.1.A1_at   | LOC418707       |
| Gga.10547.1.S1_at   | PEX7            |
| Gga.10548.1.S1_s_at | LOC418304       |
| Gga.1055.1.S1_at    | HK2             |
| Gga.10554.1.S1_at   | DHX36           |
| Gga.10559.1.S1_at   | CAMSAP1L1       |
| Gga.1056.2.S1_s_at  | OLA1            |
| Gga.10561.1.S1_s_at | OSBPL5          |
| Gga.1057.1.S1_at    | NFKB2           |
| Gga.10575.1.S1_at   | LOC423162       |
| Gga.10576.1.S1_at   | BNIP2           |
| Gga.10576.1.S1_s_at | BNIP2           |
| Gga.10577.1.S1_s_at | NSMAF           |
| Gga.10579.1.S1_s_at | IL17RA          |
| Gga.10585.1.A1_at   | MGA             |

|                     |           |
|---------------------|-----------|
| Gga.10592.1.A1_at   | EVX2      |
| Gga.10596.1.S1_s_at | AMPD3     |
| Gga.10597.1.S1_at   | USP24     |
| Gga.10605.1.S1_at   | LYRM1     |
| Gga.10606.1.S1_at   | SOCS1     |
| Gga.1061.1.S1_a_at  | PDRG1     |
| Gga.10610.1.S1_s_at | C7orf25   |
| Gga.10615.2.S1_a_at | POPDC2    |
| Gga.10618.1.S1_s_at | MTMR3     |
| Gga.10620.1.S1_at   | LOC776458 |
| Gga.10629.1.S1_at   | CDADC1    |
| Gga.10632.1.S1_s_at | KIF15     |
| Gga.10633.1.S1_at   | STAM      |
| Gga.10636.1.S1_at   | C21orf7   |
| Gga.10638.1.S1_at   | PYGO1     |
| Gga.10641.1.S1_at   | HERC3     |
| Gga.10646.1.S1_at   | CLASP2    |
| Gga.10652.1.S1_at   | NOTCH2    |
| Gga.10657.1.S1_at   | DEPDC5    |
| Gga.10663.1.S1_s_at | TSEN54    |
| Gga.10673.1.S1_at   | LRRC20    |
| Gga.10677.1.S1_a_at | PTCD2     |
| Gga.10678.1.S1_at   | TP53I11   |
| Gga.1068.1.S1_at    | RPL23     |
| Gga.10681.2.S1_at   | LOC429823 |
| Gga.10683.1.S1_at   | FAS       |
| Gga.10688.3.S1_a_at | VPS13B    |
| Gga.10697.1.S1_at   | DNAJA4    |
| Gga.10700.1.S1_at   | LOC421500 |
| Gga.10703.1.S1_at   | CHID1     |
| Gga.10713.1.S1_at   | LOC418168 |
| Gga.10727.1.S1_s_at | PAPSS1    |
| Gga.10730.1.S1_at   | AGGF1     |
| Gga.10735.1.S1_at   | LOC421656 |
| Gga.10736.1.A1_at   | GINS1     |
| Gga.10738.1.S1_at   | DOCK7     |
| Gga.10740.1.S1_s_at | MTMR15    |
| Gga.10743.1.S1_s_at | GALM      |
| Gga.10745.1.S1_s_at | CYP4V2    |
| Gga.10745.2.S1_s_at | CYP4V2    |

|                     |                         |
|---------------------|-------------------------|
| Gga.10746.1.S1_at   | LOC769486               |
| Gga.10746.2.A1_at   | LOC769486               |
| Gga.1075.1.S1_a_at  | LOC791224               |
| Gga.10752.1.S1_at   | LOC777098               |
| Gga.10753.1.S1_at   | REEP3                   |
| Gga.10759.1.S1_at   | PPPDE2                  |
| Gga.10762.1.S1_at   | RDM1                    |
| Gga.10764.1.S1_s_at | NOL8                    |
| Gga.10768.1.A1_at   | FAT2                    |
| Gga.10770.1.S1_x_at | LOC425324 /// LOC426333 |
| Gga.10770.2.S1_a_at | LOC425324               |
| Gga.10770.2.S1_x_at | LOC771168               |
| Gga.10775.1.S1_at   | NARG1L                  |
| Gga.10777.1.S1_s_at | PGBD3                   |
| Gga.10786.1.S1_at   | LOC429958               |
| Gga.10787.1.S1_at   | BATF3                   |
| Gga.10790.1.S1_s_at | GAA                     |
| Gga.10791.1.S1_s_at | COL4A3BP                |
| Gga.10794.1.S1_at   | POR                     |
| Gga.1080.2.S1_s_at  | MTHFD1                  |
| Gga.10805.1.S1_at   | TBC1D24                 |
| Gga.10809.1.S1_at   | LRRC6                   |
| Gga.1081.1.S1_at    | ATAD1                   |
| Gga.10812.1.S1_at   | ZBTB38                  |
| Gga.10813.1.S1_at   | GAS8                    |
| Gga.10819.2.S1_at   | FBXO30                  |
| Gga.10819.2.S1_s_at | FBXO30                  |
| Gga.10821.1.S1_at   | TRIP12                  |
| Gga.10823.1.S1_s_at | CCDC18                  |
| Gga.10829.1.S1_s_at | EDNRB                   |
| Gga.10841.1.S1_at   | HNMT                    |
| Gga.10842.1.S1_at   | GNG13                   |
| Gga.10849.2.S1_a_at | PSPH                    |
| Gga.10850.1.S1_a_at | NSMCE2                  |
| Gga.10852.1.S1_s_at | LRRC8A                  |
| Gga.10857.1.S1_s_at | MLH1                    |
| Gga.10858.1.S1_at   | SERPINA1                |
| Gga.1086.2.A1_at    | PTRH2                   |
| Gga.10863.1.S1_s_at | BMP4                    |
| Gga.10866.1.S1_at   | LOC424585               |

|                     |           |
|---------------------|-----------|
| Gga.10867.1.S1_at   | ACTBL2    |
| Gga.10869.1.S1_at   | ABLM2     |
| Gga.1087.1.S1_at    | IRF7      |
| Gga.10874.1.S1_at   | CNDP1     |
| Gga.10876.1.S1_s_at | HIPK2     |
| Gga.10877.1.S1_s_at | TBC1D8    |
| Gga.10878.1.S1_at   | PIAS4     |
| Gga.10880.1.S1_at   | GRAP      |
| Gga.10881.1.S1_at   | PAK1      |
| Gga.10888.2.A1_at   | LOC425610 |
| Gga.10889.1.S1_at   | LOC415713 |
| Gga.10893.1.S1_at   | CA5B      |
| Gga.10901.1.S1_at   | LOC416722 |
| Gga.10910.1.S1_s_at | SLC22A16  |
| Gga.10918.2.S1_at   | C22orf13  |
| Gga.10927.1.S1_at   | STXBP6    |
| Gga.10933.1.S1_at   | PCM1      |
| Gga.1094.1.S1_at    | CTSD      |
| Gga.1094.1.S2_at    | CTSD      |
| Gga.10940.1.S1_at   | XRCC4     |
| Gga.10945.1.S1_at   | CUZD1     |
| Gga.10949.1.S1_at   | IQGAP2    |
| Gga.10956.1.S1_at   | AP1S3     |
| Gga.10957.1.S1_s_at | UHRF1     |
| Gga.10959.1.A1_at   | FUCA2     |
| Gga.10965.1.S1_s_at | MYO16     |
| Gga.10968.1.S1_at   | GSTO1     |
| Gga.10971.1.A1_at   | XG        |
| Gga.10973.1.S1_at   | ICA1      |
| Gga.10974.1.S1_s_at | ST5       |
| Gga.10977.1.S1_at   | KCNE4     |
| Gga.10980.2.S1_at   | PAPPA     |
| Gga.10980.2.S1_s_at | PAPPA     |
| Gga.10982.1.S1_at   | DNAJC19   |
| Gga.10983.1.S1_at   | LOC418258 |
| Gga.10984.1.S1_at   | C1orf80   |
| Gga.10985.1.S1_at   | TMEM45A   |
| Gga.10988.1.S1_a_at | EFCAB1    |
| Gga.10988.1.S1_x_at | EFCAB1    |
| Gga.10995.1.S1_at   | C9orf23   |



|                     |                         |
|---------------------|-------------------------|
| Gga.10995.1.S1_s_at | C9orf23                 |
| Gga.10997.1.S1_at   | UBXD7                   |
| Gga.10997.1.S1_s_at | UBXD7                   |
| Gga.10998.1.S1_at   | TMEM63A                 |
| Gga.11001.1.S1_at   | TIAL1                   |
| Gga.11003.1.S1_at   | PGBD5                   |
| Gga.11010.1.S1_at   | SLC6A15                 |
| Gga.11023.1.S1_at   | GLTP                    |
| Gga.11026.1.S1_at   | PKHD1                   |
| Gga.11028.2.S1_s_at | METTL8                  |
| Gga.11029.1.S1_at   | TARSL2                  |
| Gga.11029.1.S1_s_at | TARSL2                  |
| Gga.11031.1.A1_at   | LOC769902               |
| Gga.11033.1.S1_s_at | ZHX1                    |
| Gga.11034.1.S1_at   | ROBO1                   |
| Gga.11035.1.S1_at   | BCOR                    |
| Gga.11036.1.S1_at   | GPD2                    |
| Gga.11038.1.S1_at   | CEP110                  |
| Gga.11040.2.S1_a_at | CCDC45                  |
| Gga.11041.1.S1_s_at | EFHC2                   |
| Gga.11053.1.S1_s_at | IPO8                    |
| Gga.1107.1.S1_at    | PTPN2                   |
| Gga.11074.1.S1_s_at | C20orf23                |
| Gga.1108.1.S1_s_at  | RCJMB04_3c23            |
| Gga.11081.1.S1_at   | KLF13                   |
| Gga.11081.1.S1_s_at | KLF13                   |
| Gga.11086.1.S1_at   | DSE                     |
| Gga.11087.1.A1_at   | C20orf42                |
| Gga.11088.1.S1_s_at | LOC422804               |
| Gga.11091.1.S1_at   | PHF6                    |
| Gga.11096.1.S1_s_at | IQWD1 /// LOC768433     |
| Gga.111.1.S1_s_at   | ITGB1                   |
| Gga.11100.1.S1_a_at | DCAKD                   |
| Gga.11101.1.S1_at   | ING2                    |
| Gga.11102.1.S1_s_at | ZNF518B                 |
| Gga.11106.1.S1_at   | RCJMB04_8b16 /// SS18L2 |
| Gga.1111.1.S1_a_at  | USP18                   |
| Gga.11111.1.S1_a_at | SMC6                    |
| Gga.11111.1.S1_s_at | SMC6                    |
| Gga.11112.1.S1_at   | C3orf23                 |

|                     |                     |
|---------------------|---------------------|
| Gga.11115.1.S1_at   | UNKL                |
| Gga.11120.1.S1_at   | LOC418636           |
| Gga.11126.1.S1_s_at | IARS                |
| Gga.11130.1.S1_at   | DCUN1D3             |
| Gga.11131.1.S1_s_at | ZC3H7A              |
| Gga.1114.1.S1_at    | CIP1                |
| Gga.11140.1.S1_s_at | LOC771662           |
| Gga.11144.1.S1_s_at | CTTNBP2             |
| Gga.11155.1.S1_s_at | STAG2               |
| Gga.11157.1.S1_at   | B3GNT5              |
| Gga.11162.1.S1_s_at | DOCK5               |
| Gga.11164.1.S1_at   | MAT2B               |
| Gga.11170.1.S1_at   | CCDC117             |
| Gga.11177.1.S1_at   | PGPEP1              |
| Gga.11179.1.S1_s_at | MYST3               |
| Gga.11181.1.S1_s_at | BACH2               |
| Gga.11192.1.S1_at   | TSPAN9              |
| Gga.11197.2.A1_at   | SLC22A2             |
| Gga.112.1.S1_a_at   | RARA                |
| Gga.11200.1.S1_s_at | BCAR3               |
| Gga.11201.1.S1_s_at | EXOC4               |
| Gga.11204.1.S1_at   | ANKRD46             |
| Gga.11204.2.S1_a_at | ANKRD46             |
| Gga.11207.1.S1_s_at | ACSL4               |
| Gga.11213.1.S1_s_at | CGNL1               |
| Gga.11217.1.S1_at   | ESRRG               |
| Gga.11218.1.S1_at   | LOC422321           |
| Gga.11223.1.S1_at   | LOC427151           |
| Gga.11225.1.S1_s_at | LOC419003           |
| Gga.11229.1.S1_at   | PPP1R3D             |
| Gga.11241.1.A1_at   | LOC768999 /// USP30 |
| Gga.11247.1.S1_at   | GLT8D2              |
| Gga.11250.1.S1_at   | SPAG17              |
| Gga.11250.2.S1_a_at | SPAG17              |
| Gga.11252.1.S1_at   | CCL19               |
| Gga.11257.1.S1_s_at | WFS1                |
| Gga.11260.1.S1_s_at | SLC7A7              |
| Gga.11262.1.S1_at   | SLC35F3             |
| Gga.11268.1.S1_at   | CMTM6               |
| Gga.1127.1.S1_at    | PMP22               |

|                     |           |
|---------------------|-----------|
| Gga.11270.1.S1_at   | GPR160    |
| Gga.11272.1.S1_at   | LOC770618 |
| Gga.11274.1.S1_s_at | PDE8A     |
| Gga.11275.1.S1_at   | LOC427516 |
| Gga.1128.2.S1_a_at  | SOD3      |
| Gga.11290.1.S1_at   | LOC768709 |
| Gga.11293.1.S1_at   | ITGB1BP2  |
| Gga.11294.1.A1_at   | CCDC76    |
| Gga.11294.1.S1_at   | CCDC76    |
| Gga.11300.1.S1_at   | LOC770869 |
| Gga.11306.1.A1_at   | MTMR7     |
| Gga.11309.1.S1_at   | LOC420553 |
| Gga.11314.1.S1_at   | ITGB3BP   |
| Gga.11315.1.S1_at   | ITGA9     |
| Gga.11317.1.S1_at   | FGF7      |
| Gga.11317.2.S1_a_at | FGF7      |
| Gga.11321.1.S1_at   | S100A10   |
| Gga.11322.1.S1_at   | STXBP1    |
| Gga.11337.1.S1_at   | LOC417192 |
| Gga.11339.1.S1_at   | VIPR2     |
| Gga.1134.1.S1_at    | GNAI3     |
| Gga.11342.1.S1_at   | GAL3ST2   |
| Gga.11346.1.S1_at   | CRLS1     |
| Gga.11350.2.S1_at   | ACE2      |
| Gga.11350.3.S1_s_at | ACE2      |
| Gga.11353.1.S1_s_at | ASXL3     |
| Gga.11355.1.S1_s_at | C3orf63   |
| Gga.11364.1.S1_s_at | CLSPN     |
| Gga.11372.1.S1_s_at | TTL7      |
| Gga.11377.1.S1_at   | UPK3A     |
| Gga.11378.1.S1_s_at | PMP2      |
| Gga.1138.1.S1_s_at  | AARS      |
| Gga.11380.1.S1_at   | FRMD3     |
| Gga.11383.1.S1_at   | DUPD1     |
| Gga.11384.2.S1_s_at | SMPX      |
| Gga.11386.1.S1_at   | ALG13     |
| Gga.11387.1.A1_at   | LOC769163 |
| Gga.11387.1.S1_s_at | FILIP1L   |
| Gga.11391.1.S1_at   | LMOD3     |
| Gga.11394.1.S1_at   | ERICH1    |

|                     |                      |
|---------------------|----------------------|
| Gga.11399.2.S1_a_at | MECR                 |
| Gga.1140.1.S1_at    | RCJMB04_11e18        |
| Gga.11405.1.S1_at   | CCNJ                 |
| Gga.11406.1.S1_a_at | LOC426545            |
| Gga.11407.1.S1_at   | FAM3B                |
| Gga.11410.1.A1_s_at | SEC24D               |
| Gga.11429.1.S1_s_at | DCLK1                |
| Gga.11430.1.S1_at   | PENK                 |
| Gga.11431.2.S1_at   | TXNDC15              |
| Gga.11436.1.S1_a_at | STARD3NL             |
| Gga.11441.1.S1_s_at | TINP1                |
| Gga.11443.1.S1_at   | C10orf26             |
| Gga.11444.1.S1_s_at | C9orf64              |
| Gga.11445.1.S1_at   | STYK1                |
| Gga.11447.1.S1_a_at | PLA2G10              |
| Gga.11449.1.S1_at   | MLLT6                |
| Gga.11450.1.S1_at   | ETNK1                |
| Gga.11451.1.S1_s_at | ELP2                 |
| Gga.11452.2.S1_a_at | OFD1                 |
| Gga.11453.1.S1_at   | TMOD3                |
| Gga.11454.1.S1_at   | ALDH7A1              |
| Gga.11456.1.S1_at   | CSTA                 |
| Gga.1146.2.S1_at    | SSB                  |
| Gga.11463.2.S1_s_at | ENPP2                |
| Gga.11466.1.S1_at   | GPR23                |
| Gga.11466.2.S1_a_at | GPR23                |
| Gga.11468.1.S1_a_at | PPIC                 |
| Gga.11469.2.S1_at   | KCTD20               |
| Gga.11469.3.S1_a_at | KCTD20               |
| Gga.1147.1.S1_s_at  | MAPK8                |
| Gga.11470.1.S1_at   | NUP153               |
| Gga.11472.1.S1_s_at | TEX2                 |
| Gga.11474.1.S1_a_at | RFESD                |
| Gga.11477.1.S1_at   | LOC418095            |
| Gga.11478.1.S1_s_at | RCJMB04_10o8         |
| Gga.11478.2.S1_s_at | RCJMB04_10o8         |
| Gga.1148.1.S2_at    | ST6GAL1              |
| Gga.11481.1.S1_at   | BRI3BP               |
| Gga.11484.1.S1_at   | CCDC18 /// LOC424498 |
| Gga.11486.1.S1_at   | LOC771147 /// RPL9   |

|                     |                             |
|---------------------|-----------------------------|
| Gga.11492.1.S1_at   | ZAK                         |
| Gga.1150.2.S1_a_at  | OLFML3                      |
| Gga.11516.1.S1_at   | P2RY6                       |
| Gga.11522.1.S1_at   | LOC775993 /// RCJMB04_19p13 |
| Gga.11522.1.S1_x_at | LOC775993 /// RCJMB04_19p13 |
| Gga.1153.1.S1_at    | DLG7                        |
| Gga.11534.1.A1_at   | ADCY7 /// LOC769333         |
| Gga.11539.1.S1_at   | LOC420129                   |
| Gga.11576.1.S1_at   | DNAJC19                     |
| Gga.11577.1.S1_at   | ABHD11                      |
| Gga.11578.1.S1_s_at | GDI2                        |
| Gga.11579.1.S1_at   | LOC415661                   |
| Gga.1158.3.S1_a_at  | HOPX                        |
| Gga.1158.3.S1_s_at  | HOPX                        |
| Gga.11580.1.S1_at   | STK16                       |
| Gga.11581.1.S1_at   | TMEM35                      |
| Gga.11584.1.S1_at   | LOC417722                   |
| Gga.11591.1.S1_at   | FGD3                        |
| Gga.11597.1.S1_s_at | RCJMB04_17i9                |
| Gga.11597.2.S1_at   | RCJMB04_17i9                |
| Gga.11597.2.S1_s_at | RCJMB04_17i9                |
| Gga.11599.1.S1_s_at | TRIM65                      |
| Gga.11604.2.S1_a_at | LOC428877                   |
| Gga.1161.1.S1_at    | SDHD                        |
| Gga.11611.1.S1_at   | WIF1                        |
| Gga.11620.1.S1_at   | POT1                        |
| Gga.11623.1.S1_at   | LOC415787                   |
| Gga.11623.2.S1_s_at | LOC415787                   |
| Gga.11628.2.S1_a_at | POLB                        |
| Gga.1163.1.S1_at    | CYP3A37                     |
| Gga.11630.1.S1_x_at | LOC426615                   |
| Gga.11630.2.S1_a_at | LOC426615                   |
| Gga.11630.2.S1_at   | LOC426615                   |
| Gga.11631.1.S1_at   | PRAM1                       |
| Gga.11635.1.S1_at   | RACGAP1                     |
| Gga.11640.1.S1_at   | SUCNR1                      |
| Gga.11641.1.S1_at   | DCI                         |
| Gga.11643.2.S1_s_at | C20orf42                    |
| Gga.11646.1.S1_at   | FAM20A                      |
| Gga.11648.1.S1_at   | PHCA                        |

|                     |                         |
|---------------------|-------------------------|
| Gga.1165.1.S1_at    | FGG                     |
| Gga.11650.2.S1_at   | GCNT7                   |
| Gga.11655.1.S1_at   | GPR56                   |
| Gga.11658.1.S1_at   | BPI                     |
| Gga.11660.1.S1_at   | TRAF2                   |
| Gga.11662.1.S1_at   | CHMP4C                  |
| Gga.11662.2.S1_a_at | CHMP4C                  |
| Gga.11665.1.S1_s_at | BHLHB2                  |
| Gga.11672.1.S1_at   | RCJMB04_13a21           |
| Gga.11675.1.S1_at   | TTLL11                  |
| Gga.11677.1.S1_at   | TOX3                    |
| Gga.11677.1.S1_s_at | TOX3                    |
| Gga.11678.4.S1_a_at | SPG21                   |
| Gga.11681.1.S1_s_at | SSX2IP                  |
| Gga.11687.1.S1_s_at | DENND4A                 |
| Gga.11689.1.S1_at   | SYNGR1                  |
| Gga.1169.1.S1_at    | AADACL2                 |
| Gga.11690.1.S1_at   | PHOSPHO2                |
| Gga.11692.1.S1_at   | LOC418120               |
| Gga.11703.1.S1_at   | AARSD1                  |
| Gga.11708.1.S1_at   | CARKL                   |
| Gga.1171.1.S1_at    | LY6E                    |
| Gga.11710.1.S1_at   | LOC769608 /// LOC769668 |
| Gga.11713.1.S1_at   | LOC426179               |
| Gga.11713.1.S1_s_at | LOC426179               |
| Gga.11714.1.S1_at   | HOXB7                   |
| Gga.11721.1.S1_s_at | DAAM2                   |
| Gga.11723.1.S1_s_at | TNRC6B                  |
| Gga.11726.1.S1_a_at | GADD45G                 |
| Gga.11730.1.S1_at   | SLC2A10                 |
| Gga.11740.1.S1_at   | LOC415459               |
| Gga.11741.1.S1_a_at | TFPI                    |
| Gga.11741.3.S1_a_at | TFPI                    |
| Gga.11741.4.A1_at   | TFPI                    |
| Gga.11741.4.S1_a_at | TFPI                    |
| Gga.11749.1.S1_a_at | CDC42EP3                |
| Gga.11751.1.S1_at   | WAPAL                   |
| Gga.11755.1.S1_at   | TERT                    |
| Gga.11758.1.S1_at   | ANKRD13A                |
| Gga.1176.2.S1_a_at  | RFWD2                   |

|                     |               |
|---------------------|---------------|
| Gga.11760.1.S1_at   | TMEM103       |
| Gga.11761.2.S1_a_at | PFTK1         |
| Gga.11762.1.S1_at   | LOC419391     |
| Gga.11764.2.S1_a_at | GCHFR         |
| Gga.11766.2.S1_a_at | NDP           |
| Gga.11776.1.S1_s_at | RACGAP1       |
| Gga.11781.1.S1_at   | TM6SF1        |
| Gga.11782.1.S1_at   | CAST          |
| Gga.11783.1.S1_at   | IL28RA        |
| Gga.11787.2.S1_s_at | SH3BGR        |
| Gga.11789.1.S1_a_at | ODZ4          |
| Gga.11791.1.S1_at   | C1QTNF7       |
| Gga.11792.1.S1_at   | NMT1          |
| Gga.11795.1.S1_s_at | RCJMB04_20k13 |
| Gga.11796.1.S1_a_at | SPCS1         |
| Gga.11797.1.S1_s_at | VRK1          |
| Gga.11799.1.S1_at   | SEPN1         |
| Gga.11799.2.S1_a_at | SEPN1         |
| Gga.11801.1.S1_a_at | JMJD2C        |
| Gga.11811.1.S1_at   | CXorf41       |
| Gga.11819.1.S1_at   | CENPQ         |
| Gga.1182.1.S1_s_at  | RCJMB04_11i10 |
| Gga.11822.1.S1_at   | PPP1R3B       |
| Gga.11825.1.S1_s_at | GK            |
| Gga.11826.2.S1_at   | WAC           |
| Gga.11827.2.S1_a_at | LOC415531     |
| Gga.11828.1.S1_at   | NINJ1         |
| Gga.11828.2.S1_a_at | NINJ1         |
| Gga.11830.1.S1_at   | DNASE1L3      |
| Gga.11832.1.S1_at   | EGLN3         |
| Gga.11834.3.S1_a_at | NAPRT1        |
| Gga.11836.1.S1_s_at | COBLL1        |
| Gga.11841.1.S1_s_at | KLF6          |
| Gga.11842.1.S1_s_at | SYDE2         |
| Gga.11845.1.S1_at   | TMEM16A       |
| Gga.11847.1.S1_at   | BTD           |
| Gga.11850.2.A1_a_at | LOC770664     |
| Gga.11850.2.S1_a_at | LOC770664     |
| Gga.11851.1.S1_at   | NTHL1         |
| Gga.11853.2.S1_a_at | LOC771706     |

|                     |                     |
|---------------------|---------------------|
| Gga.11854.1.S1_at   | TSPAN6              |
| Gga.11855.1.S1_at   | LOC421956           |
| Gga.11859.1.S1_at   | ARHGAP1             |
| Gga.1187.2.S1_s_at  | LIMS1 /// LOC771176 |
| Gga.11874.1.S1_at   | SLC7A6OS            |
| Gga.11876.1.S1_a_at | C9orf19             |
| Gga.11876.2.S1_at   | C9orf19             |
| Gga.11876.3.S1_a_at | C9orf19             |
| Gga.11878.1.S1_at   | SFXN5               |
| Gga.11879.1.S1_at   | LOC424258           |
| Gga.1188.1.S1_at    | CIAO1               |
| Gga.11883.3.S1_at   | ASPH                |
| Gga.11883.4.S1_a_at | ASPH                |
| Gga.1189.2.S1_a_at  | HMGN1               |
| Gga.11890.1.S1_at   | NARF                |
| Gga.11900.1.S1_at   | FAM129A             |
| Gga.11901.1.S1_at   | SLC4A7              |
| Gga.11902.1.A1_at   | TMEM57              |
| Gga.11908.1.S1_at   | CMC1                |
| Gga.11908.2.S1_a_at | CMC1                |
| Gga.11908.3.S1_at   | CMC1                |
| Gga.11909.1.S1_s_at | MPP7                |
| Gga.11911.2.S1_a_at | ZMYND11             |
| Gga.11914.2.S1_a_at | WAPAL               |
| Gga.11915.2.S1_a_at | CD99L2              |
| Gga.11917.1.S1_at   | TROVE2              |
| Gga.11918.1.S1_at   | NSUN3               |
| Gga.11920.2.S1_a_at | RG9MTD2             |
| Gga.11922.1.S1_at   | BTF3                |
| Gga.11927.1.S1_s_at | CPM                 |
| Gga.11929.1.S1_at   | KLHDC8A             |
| Gga.1193.1.S1_at    | PTPRC               |
| Gga.1193.1.S2_at    | PTPRC               |
| Gga.11930.1.S1_s_at | FLRT2               |
| Gga.11938.3.S1_s_at | ASTE1               |
| Gga.11941.1.S1_at   | AK5                 |
| Gga.11945.1.S1_at   | CNRIP1              |
| Gga.11947.3.S1_at   | ISCA2               |
| Gga.11948.1.S1_at   | KLC1                |
| Gga.11948.2.S1_a_at | KLC1                |



|                     |           |
|---------------------|-----------|
| Gga.11950.1.S1_s_at | KCNK5     |
| Gga.11955.1.S1_at   | IGSF6     |
| Gga.11957.1.S1_s_at | WHSC1L1   |
| Gga.11958.1.S1_a_at | C1orf35   |
| Gga.11959.1.S1_at   | ZCCHC4    |
| Gga.11961.1.S1_at   | MRPL53    |
| Gga.11963.1.S1_at   | BLZF1     |
| Gga.11965.1.S1_at   | TRAPPC2L  |
| Gga.11966.1.S1_a_at | RCAN2     |
| Gga.11967.1.S1_at   | GPC5      |
| Gga.11968.1.S1_at   | QRSL1     |
| Gga.11971.2.S1_at   | IKZF5     |
| Gga.11985.1.S1_at   | ELMOD1    |
| Gga.11991.1.S1_at   | POLR2C    |
| Gga.11993.1.S1_s_at | RNF11     |
| Gga.11996.1.S1_at   | RASD2     |
| Gga.11997.1.S1_a_at | LOC419483 |
| Gga.11999.1.A1_at   | SCG2      |
| Gga.11999.1.S1_at   | SCG2      |
| Gga.12002.1.S1_a_at | CAPSL     |
| Gga.12003.1.S1_at   | THOC2     |
| Gga.12004.1.S1_s_at | DICER1    |
| Gga.12006.1.S1_at   | ADM       |
| Gga.12007.1.S1_at   | C3orf34   |
| Gga.1201.1.S1_s_at  | GYG1      |
| Gga.12011.1.S1_x_at | CEP290    |
| Gga.12012.1.S1_at   | FAM118B   |
| Gga.12022.1.S1_s_at | BYSL      |
| Gga.12024.1.S1_at   | BPHL      |
| Gga.12026.2.S1_at   | NENF      |
| Gga.12028.1.S1_a_at | LOC416518 |
| Gga.12029.1.S1_at   | MRPS27    |
| Gga.12030.4.S1_a_at | PEX16     |
| Gga.12030.4.S1_x_at | PEX16     |
| Gga.12034.1.S1_at   | LOC769277 |
| Gga.12035.2.S1_a_at | OXNAD1    |
| Gga.1204.1.S1_s_at  | LOC425529 |
| Gga.12040.2.S1_a_at | TSPAN8    |
| Gga.12043.1.S1_at   | PALMD     |
| Gga.12048.1.S1_a_at | ZFAND1    |

|                     |              |
|---------------------|--------------|
| Gga.12055.1.S1_s_at | PRAGMIN      |
| Gga.12057.1.S1_at   | LRAT         |
| Gga.12058.1.S1_at   | LOC420294    |
| Gga.1207.1.S1_at    | LOC426515    |
| Gga.12072.2.S1_a_at | MED31        |
| Gga.12074.1.S1_s_at | CP           |
| Gga.12075.1.S1_at   | LOC420592    |
| Gga.12076.1.S1_at   | P2RX5        |
| Gga.12079.2.S1_a_at | PAP2D        |
| Gga.1208.2.S1_a_at  | SLC25A16     |
| Gga.12080.1.S1_at   | RRAD         |
| Gga.12085.1.S1_at   | LOC418836    |
| Gga.12088.2.S1_a_at | FLRT3        |
| Gga.12089.1.S1_a_at | LOC424430    |
| Gga.12095.1.S1_at   | C6orf57      |
| Gga.12097.1.S1_s_at | POLA1        |
| Gga.12098.1.S1_a_at | LOC415756    |
| Gga.121.1.S1_at     | UCP3         |
| Gga.1210.1.S1_at    | CCRN4L       |
| Gga.12104.1.S1_at   | RAMP2        |
| Gga.12105.2.S1_a_at | C2orf34      |
| Gga.12106.1.S1_a_at | RCJMB04_8b16 |
| Gga.12110.2.S1_a_at | OLFM3        |
| Gga.12112.1.S1_at   | APOBEC2      |
| Gga.12113.1.A1_at   | SH3BGRL2     |
| Gga.12115.1.S1_s_at | ZNF207       |
| Gga.12116.1.S1_s_at | MYST4        |
| Gga.12119.2.S1_a_at | LOC416419    |
| Gga.12120.1.S1_at   | PACSIN3      |
| Gga.12121.1.S1_at   | SUSD3        |
| Gga.12127.1.S1_s_at | RBM26        |
| Gga.12132.2.S1_a_at | SRD5A2L2     |
| Gga.12133.1.S1_s_at | TTC14        |
| Gga.12136.1.S1_at   | CHCHD1       |
| Gga.1214.1.S1_at    | ZNF294       |
| Gga.12140.2.S1_a_at | EGFL7        |
| Gga.12140.2.S1_s_at | EGFL7        |
| Gga.12144.1.S1_s_at | RAPGEF1      |
| Gga.12148.1.S1_at   | ICK          |
| Gga.12149.1.S1_s_at | HNRPLL       |

|                     |                   |
|---------------------|-------------------|
| Gga.12149.2.S1_at   | HNRPLL            |
| Gga.1216.1.S1_at    | C12orf57          |
| Gga.12160.3.S1_a_at | UBXD1             |
| Gga.12162.1.S1_at   | CXorf36           |
| Gga.12165.1.S1_at   | FAM62B /// NCAPG2 |
| Gga.12166.1.S1_at   | ZEB2              |
| Gga.12169.1.S1_at   | C16orf42          |
| Gga.12171.1.S1_s_at | DDX24             |
| Gga.12183.3.S1_a_at | DHR SX            |
| Gga.12186.1.S1_at   | LYVE1             |
| Gga.12192.1.S1_at   | OSMR              |
| Gga.12192.2.S1_a_at | OSMR              |
| Gga.12193.1.S1_a_at | C7orf16           |
| Gga.12197.2.S1_s_at | AKAP12            |
| Gga.122.2.S1_a_at   | CFDP1             |
| Gga.12201.1.S1_at   | C7orf36           |
| Gga.12201.2.S1_a_at | C7orf36           |
| Gga.12203.1.S1_at   | SPC25             |
| Gga.12204.1.S1_at   | KATNA1            |
| Gga.12205.1.S1_at   | C13orf7           |
| Gga.12207.1.S1_s_at | RTTN              |
| Gga.12208.2.S1_at   | GINS1             |
| Gga.12209.1.S1_at   | C4orf31           |
| Gga.1221.1.S1_at    | WHSC1             |
| Gga.12211.1.S1_at   | LOC426086         |
| Gga.12212.1.S1_a_at | CENPK             |
| Gga.12213.1.S1_s_at | ZMAT5             |
| Gga.12218.1.S1_at   | KDEL R3           |
| Gga.12224.1.S1_a_at | NT5DC1            |
| Gga.12225.1.S1_at   | SFRS17A           |
| Gga.12229.1.S1_at   | CAMK4             |
| Gga.12232.1.S1_at   | KLF3              |
| Gga.12233.1.S1_at   | AS A HL           |
| Gga.12234.1.S1_at   | TYMS              |
| Gga.12237.1.S1_at   | STX18             |
| Gga.12240.1.S1_at   | ACSBG1            |
| Gga.12241.1.S1_at   | PPFIA1            |
| Gga.12241.1.S1_s_at | PPFIA1            |
| Gga.12242.2.S1_at   | NUDT7             |
| Gga.12243.1.S1_at   | RWDD2B            |

|                     |               |
|---------------------|---------------|
| Gga.12249.1.S1_at   | DBX2          |
| Gga.12255.1.S1_at   | WASL          |
| Gga.12255.1.S1_s_at | WASL          |
| Gga.12256.1.S1_at   | LOC771073     |
| Gga.1226.1.S1_s_at  | KIAA1274      |
| Gga.1226.2.S1_s_at  | KIAA1274      |
| Gga.12260.1.S1_at   | IRAK1BP1      |
| Gga.12261.1.S1_at   | SNN           |
| Gga.12264.2.S1_a_at | COR4          |
| Gga.12266.1.S1_at   | FABP3         |
| Gga.12267.1.S1_s_at | NDUFAF1       |
| Gga.12272.1.S1_at   | C15orf40      |
| Gga.12278.1.S1_a_at | ADAT2         |
| Gga.12280.1.S1_at   | SUV420H1      |
| Gga.12280.2.S1_a_at | SUV420H1      |
| Gga.12294.1.S1_a_at | CYBASC3       |
| Gga.12298.1.S1_at   | VSTM2A        |
| Gga.123.1.S1_at     | MUSK          |
| Gga.12301.1.S1_at   | PSCD3         |
| Gga.12302.1.S1_at   | IMPAD1        |
| Gga.12304.1.S1_at   | C18orf55      |
| Gga.12305.1.S1_at   | LOC423054     |
| Gga.12307.3.S1_a_at | SORBS2        |
| Gga.12309.1.S1_at   | AIFM2         |
| Gga.12310.1.S1_at   | BBOX1         |
| Gga.12311.2.S1_x_at | TIRAP         |
| Gga.12315.1.S1_s_at | CDKL2         |
| Gga.1232.1.S1_at    | CALCA         |
| Gga.1232.2.S1_a_at  | CALCA         |
| Gga.12326.1.S1_s_at | MXI1          |
| Gga.1233.3.S1_at    | AP3B1         |
| Gga.12331.2.S1_a_at | PCMTD2        |
| Gga.12332.1.S1_at   | GOLPH3        |
| Gga.12334.1.S1_at   | ANKRD16       |
| Gga.12335.2.S1_s_at | RCJMB04_26f20 |
| Gga.12337.3.S1_a_at | GTF2E2        |
| Gga.12337.3.S1_s_at | WRN           |
| Gga.12338.1.S1_at   | PTPRF         |
| Gga.12341.1.S1_s_at | SLC13A5       |
| Gga.12346.1.S1_at   | LOC424919     |

|                     |              |
|---------------------|--------------|
| Gga.12348.1.S1_at   | C3orf39      |
| Gga.12349.1.S1_at   | ASAM         |
| Gga.1235.2.S1_at    | KCNAB2       |
| Gga.12350.1.S1_at   | LOC426886    |
| Gga.12352.1.S1_s_at | UACA         |
| Gga.12360.1.S1_at   | TMEM213      |
| Gga.12364.1.S1_at   | ZNF330       |
| Gga.12370.1.S1_at   | TFB1M        |
| Gga.12370.3.S1_a_at | TFB1M        |
| Gga.12370.3.S1_x_at | TFB1M        |
| Gga.12371.1.S1_at   | RCJMB04_9f20 |
| Gga.1238.1.S1_at    | ADD1         |
| Gga.12381.1.S1_s_at | LOC427449    |
| Gga.12383.1.S1_at   | CRHBP        |
| Gga.12388.1.S1_at   | FANCL        |
| Gga.12391.1.S1_at   | LOC422172    |
| Gga.12393.1.S1_at   | CHST6        |
| Gga.12396.2.S1_at   | TMEM164      |
| Gga.124.1.S1_at     | FBP2         |
| Gga.12401.1.S1_at   | PRRG4        |
| Gga.12407.1.S1_at   | LOC422654    |
| Gga.12408.3.S1_a_at | ATXN3        |
| Gga.12412.1.S1_at   | ITGB1BP1     |
| Gga.12413.1.S1_s_at | UBXD7        |
| Gga.12417.1.S1_at   | LOC776125    |
| Gga.12423.1.S1_at   | EFR3A        |
| Gga.12424.1.S1_at   | KIF21A       |
| Gga.12428.1.S1_s_at | ANKRD10      |
| Gga.12432.2.S1_a_at | C10orf57     |
| Gga.12434.1.S1_at   | MAP3K7       |
| Gga.12437.1.S1_at   | SFRS11       |
| Gga.12437.2.S1_at   | CHGA         |
| Gga.12438.1.S1_at   | EXOSC7       |
| Gga.12439.1.S1_s_at | UBXD2        |
| Gga.1244.1.S1_at    | RCJMB04_8o21 |
| Gga.12440.1.S1_a_at | LYRM1        |
| Gga.12443.1.S1_at   | GALNTL4      |
| Gga.12454.1.S1_at   | RLN3         |
| Gga.12456.1.S1_at   | SIRT5        |
| Gga.12458.1.S1_s_at | MLLT4        |

|                     |                    |
|---------------------|--------------------|
| Gga.12459.1.S1_at   | RBM17              |
| Gga.1246.1.S1_at    | C3orf37            |
| Gga.12461.3.A1_at   | SNRNP35            |
| Gga.12463.1.S1_at   | PPP2R3B            |
| Gga.12466.2.S1_a_at | KCNE3              |
| Gga.12468.1.S1_at   | SUMF2              |
| Gga.1247.1.S1_at    | LOC396098          |
| Gga.1247.1.S2_at    | LOC396098          |
| Gga.12470.1.S1_at   | LOC426994          |
| Gga.12471.1.S1_at   | VASH2              |
| Gga.12472.1.S1_s_at | LOC422745          |
| Gga.12475.1.S1_at   | TTYH3              |
| Gga.12477.1.S1_at   | LOC776632 /// NAPG |
| Gga.12478.1.S1_at   | JSRP1              |
| Gga.12486.1.S1_at   | TSPAN13            |
| Gga.1249.1.S1_at    | GRPEL1             |
| Gga.12491.1.S1_a_at | DNTTIP1            |
| Gga.12492.1.S1_at   | C9orf30            |
| Gga.12493.2.S1_s_at | ZNF451             |
| Gga.12502.1.S1_at   | NAF1               |
| Gga.12503.2.S1_at   | NXNL2              |
| Gga.12504.1.S1_at   | COMMD4             |
| Gga.12506.1.S1_at   | EML4               |
| Gga.12507.1.S1_s_at | ZDHHC20            |
| Gga.12510.1.S1_at   | LOC420043          |
| Gga.12512.1.S1_at   | PLXDC2             |
| Gga.12515.1.S1_at   | LHX8               |
| Gga.12516.1.S1_s_at | IL20RA             |
| Gga.12519.1.S1_at   | ZCCHC2             |
| Gga.12523.1.S1_at   | CPPED1             |
| Gga.12525.1.S1_at   | FREM1              |
| Gga.12535.1.S1_at   | LOC424152          |
| Gga.12537.1.S1_at   | MPHOSPH9           |
| Gga.12539.2.S1_at   | NPLOC4             |
| Gga.12541.1.S1_at   | NUDT2              |
| Gga.12545.1.S1_s_at | VPS8               |
| Gga.12546.1.S1_s_at | INPP4B             |
| Gga.12557.1.S1_at   | TMEFF2             |
| Gga.12560.1.S1_s_at | RCJMB04_9o2        |
| Gga.12561.1.A1_at   | DSE                |

|                     |               |
|---------------------|---------------|
| Gga.12562.1.S1_at   | C14orf153     |
| Gga.12562.2.S1_a_at | C14orf153     |
| Gga.12562.2.S1_x_at | C14orf153     |
| Gga.12563.1.S1_at   | RGS7          |
| Gga.12564.1.S1_at   | LATS1         |
| Gga.12565.1.S1_s_at | CACNA2D1      |
| Gga.12566.1.S1_at   | LRRC42        |
| Gga.12569.1.S1_at   | FNBP1L        |
| Gga.1257.1.S1_s_at  | GLCCI1        |
| Gga.12570.1.S1_s_at | LOC424004     |
| Gga.12574.1.S1_at   | LOC418549     |
| Gga.12576.1.S1_at   | PARD6B        |
| Gga.1258.1.S1_at    | CANX          |
| Gga.12582.1.S1_at   | LOC430620     |
| Gga.12588.2.S1_a_at | LOC415770     |
| Gga.12588.3.S1_a_at | C19orf40      |
| Gga.12593.1.S1_at   | PDCD6         |
| Gga.12594.1.S1_at   | LOC424261     |
| Gga.12596.1.S1_at   | STK11         |
| Gga.12597.1.S1_at   | LOC419381     |
| Gga.12598.1.S1_at   | RHOJ          |
| Gga.12599.1.S1_s_at | WDR12         |
| Gga.126.1.S1_at     | TLE4          |
| Gga.12600.1.S1_s_at | C7            |
| Gga.12603.1.S1_at   | TRIM23        |
| Gga.12604.1.S1_a_at | MS4A15        |
| Gga.12606.1.S1_at   | RAI14         |
| Gga.12606.1.S1_s_at | RAI14         |
| Gga.12609.1.S1_at   | AGGF1         |
| Gga.1262.2.S1_at    | RCJMB04_10f20 |
| Gga.12624.1.S1_at   | NDUFS5        |
| Gga.12625.1.S1_at   | CD99          |
| Gga.12626.1.S1_at   | HCFC2         |
| Gga.12626.2.S1_s_at | HCFC2         |
| Gga.12630.1.S1_s_at | WDR12         |
| Gga.12631.2.S1_at   | LOC417712     |
| Gga.12632.1.S1_at   | SLC45A1       |
| Gga.12635.1.S1_at   | LOC428459     |
| Gga.12635.2.S1_a_at | LOC428459     |
| Gga.12636.1.A1_at   | NPM1          |

|                     |                    |
|---------------------|--------------------|
| Gga.12637.2.S1_a_at | UTP18              |
| Gga.12640.1.S1_s_at | WDR33              |
| Gga.12642.2.S1_a_at | LOC424434          |
| Gga.12648.1.S1_at   | STEAP1             |
| Gga.1265.3.S1_at    | PDPK1              |
| Gga.1266.2.S1_a_at  | TXLNA              |
| Gga.12660.2.S1_a_at | PCSK5              |
| Gga.12661.1.S1_at   | PNPLA8             |
| Gga.12662.1.S1_at   | RCJMB04_17i9       |
| Gga.12663.2.S1_a_at | RFXDC2             |
| Gga.12667.2.S1_s_at | FILIP1             |
| Gga.12668.1.S1_at   | SUV420H1           |
| Gga.12669.1.S1_at   | RAD1               |
| Gga.12674.3.A1_a_at | TMEM131            |
| Gga.12675.1.S1_at   | LOC427367          |
| Gga.12678.1.S1_at   | C12orf43           |
| Gga.1268.1.S1_a_at  | RHOG               |
| Gga.12682.1.S1_s_at | CASC5              |
| Gga.12683.1.S1_at   | RCJMB04_21o24      |
| Gga.12684.2.S1_s_at | EXOSC2             |
| Gga.12688.1.S1_at   | SEPX1              |
| Gga.12697.1.S1_at   | GPR143             |
| Gga.12705.1.A1_at   | CHMP5              |
| Gga.12707.1.S1_s_at | DDEF1              |
| Gga.12730.1.S1_s_at | JMJD2B             |
| Gga.12733.1.S1_a_at | TRAF3IP1 /// USP40 |
| Gga.12737.1.S1_at   | LOC426031          |
| Gga.12738.1.S1_at   | DYNLRB2            |
| Gga.12741.1.S1_at   | SCN8A              |
| Gga.12741.1.S1_s_at | SCN8A              |
| Gga.12743.1.S1_at   | ETV7               |
| Gga.12750.1.S1_at   | HEATR5B            |
| Gga.12755.1.S1_s_at | OTUD7A             |
| Gga.12759.1.S1_at   | CPNE8              |
| Gga.12764.1.S1_s_at | SRGAP1             |
| Gga.12774.1.S1_at   | OPRL1              |
| Gga.12781.1.S1_at   | LSM11              |
| Gga.12788.1.S1_at   | NDUFA2             |
| Gga.12797.1.A1_at   | LOC422427          |
| Gga.128.1.S1_at     | NR3C1              |



|                     |                         |
|---------------------|-------------------------|
| Gga.12800.1.S1_at   | MMP3                    |
| Gga.12802.1.S1_s_at | KIF1B                   |
| Gga.12811.1.S1_s_at | NUAK2                   |
| Gga.12818.1.S1_at   | PTPN13                  |
| Gga.12830.1.S1_at   | TBC1D14                 |
| Gga.12834.1.S1_s_at | LOC769019               |
| Gga.12839.1.S1_at   | C14orf79                |
| Gga.12842.1.S1_at   | HABP2                   |
| Gga.12843.1.S1_at   | PPTC7                   |
| Gga.12846.1.S1_at   | SMG7                    |
| Gga.12847.1.S1_s_at | PASK                    |
| Gga.12849.1.S1_at   | SMOC2                   |
| Gga.12855.1.S1_at   | IQCK                    |
| Gga.12858.1.S1_at   | GATSL1                  |
| Gga.12861.1.S1_at   | LOC415708               |
| Gga.12862.1.S1_s_at | GNPTAB                  |
| Gga.12864.1.S1_at   | TEKT1                   |
| Gga.12864.1.S1_s_at | TEKT1                   |
| Gga.12866.1.A1_at   | UGP2                    |
| Gga.12867.1.S1_at   | NR2C1                   |
| Gga.12870.1.S1_at   | KCNIP1                  |
| Gga.12873.1.S1_at   | CHMP1A                  |
| Gga.12881.1.S1_s_at | ATP11B                  |
| Gga.12884.1.S1_at   | PLA2R1                  |
| Gga.12886.1.S1_at   | ST6GAL2                 |
| Gga.1289.1.S1_at    | CCNT2                   |
| Gga.12890.2.S1_a_at | SLC35B3                 |
| Gga.1290.1.S1_at    | NDUFS3                  |
| Gga.12909.1.S1_at   | RHPN2                   |
| Gga.12911.1.S1_at   | RASL11B                 |
| Gga.12914.1.S1_at   | C12orf11                |
| Gga.12916.1.S1_at   | NARG1L                  |
| Gga.12917.1.S1_at   | SLC35B3                 |
| Gga.12922.1.S1_s_at | SLC12A7                 |
| Gga.12924.1.S1_at   | SGCE                    |
| Gga.12925.1.S1_at   | SMCHD1                  |
| Gga.12928.1.S1_at   | VCAM1                   |
| Gga.1293.1.S1_at    | LOC420252 /// LOC771634 |
| Gga.12931.1.S1_s_at | ELL                     |
| Gga.12933.1.S1_at   | RCJMB04_3f10            |

|                     |               |
|---------------------|---------------|
| Gga.12938.1.S1_at   | NPBWR1        |
| Gga.12939.1.S1_at   | KIAA1826      |
| Gga.1294.1.S1_at    | MYO1F         |
| Gga.12941.1.S1_at   | SDCCAG10      |
| Gga.12943.1.S1_s_at | CD8A          |
| Gga.12944.1.S1_at   | RGS19         |
| Gga.12945.1.S1_at   | GCK           |
| Gga.12946.1.S1_at   | RCJMB04_11p1  |
| Gga.12947.1.S1_at   | LONP2         |
| Gga.12949.1.S1_at   | SPAG9         |
| Gga.1295.1.S1_at    | UBE2A         |
| Gga.1295.1.S2_at    | UBE2A         |
| Gga.12952.1.S1_at   | INPP5B        |
| Gga.12953.1.S1_at   | ASB2          |
| Gga.12955.1.S1_at   | RCJMB04_3p2   |
| Gga.12956.1.S1_s_at | C14orf129     |
| Gga.12965.1.S1_s_at | C21orf45      |
| Gga.12968.1.S1_s_at | DBF4          |
| Gga.12985.1.S1_at   | AP4E1         |
| Gga.12986.1.S1_at   | NKTR          |
| Gga.12988.1.S1_at   | COL24A1       |
| Gga.12993.1.S1_at   | RCJMB04_4k2   |
| Gga.12995.1.S1_s_at | CLIC4         |
| Gga.12997.1.S1_s_at | PRRX2         |
| Gga.12999.1.S1_at   | TMEM214       |
| Gga.13000.1.S1_at   | RAB2A         |
| Gga.13002.1.S1_at   | LOC417445     |
| Gga.1301.1.S1_at    | LRPPRC        |
| Gga.13012.1.S1_s_at | ASCC3         |
| Gga.13017.1.S1_s_at | RCJMB04_23i18 |
| Gga.13018.1.S1_s_at | C1orf77       |
| Gga.13022.1.A1_at   | DNAJB4        |
| Gga.13027.1.S1_at   | KCNH7         |
| Gga.13028.1.S1_at   | ELF1          |
| Gga.1303.1.S1_s_at  | FAM53A        |
| Gga.13036.1.S1_at   | SORBS2        |
| Gga.13038.1.S1_at   | CYB5R4        |
| Gga.13038.1.S1_s_at | CYB5R4        |
| Gga.13049.2.S1_s_at | KIAA1467      |
| Gga.13052.1.S1_s_at | DPP9          |

|                     |                          |
|---------------------|--------------------------|
| Gga.1306.1.S1_at    | NCAPG2                   |
| Gga.13062.1.S1_at   | MVK                      |
| Gga.13064.1.S1_at   | SEMA4G                   |
| Gga.13076.1.S1_at   | OMA1                     |
| Gga.13077.1.S1_s_at | PHLDB2                   |
| Gga.1308.1.S1_at    | KIF20A /// RCJMB04_10113 |
| Gga.13084.2.S1_a_at | LOC417981                |
| Gga.13091.1.S1_at   | TMEM41B                  |
| Gga.13099.1.S1_at   | LOC418364                |
| Gga.131.1.S1_at     | MX1                      |
| Gga.13100.1.S1_s_at | D2HGDH                   |
| Gga.13104.1.S1_at   | GAD2                     |
| Gga.1311.3.S1_at    | LOC418309                |
| Gga.1311.8.S1_at    | LOC768776                |
| Gga.13115.1.S1_at   | TMEM62                   |
| Gga.13118.1.S1_at   | LOC771481                |
| Gga.13129.1.S1_s_at | LOC419204                |
| Gga.1313.1.S1_s_at  | SPI1                     |
| Gga.13135.1.S1_at   | ZCRB1                    |
| Gga.13140.1.S1_s_at | IVNS1ABP                 |
| Gga.13141.3.A1_at   | ZNF512B                  |
| Gga.13141.3.S1_s_at | UCKL1 /// ZNF512B        |
| Gga.13144.1.S1_at   | C14orf32                 |
| Gga.13146.1.S1_at   | EPSTI1                   |
| Gga.13148.1.S1_at   | LOC416052                |
| Gga.13150.1.S1_at   | PRICKLE2                 |
| Gga.13153.1.S1_at   | TECPR1                   |
| Gga.13158.1.S1_at   | MAP3K7                   |
| Gga.13159.1.S1_s_at | LOC426100                |
| Gga.13163.1.S1_at   | TIPRL                    |
| Gga.13173.1.S1_at   | PTER                     |
| Gga.13174.1.S1_at   | TUBD1                    |
| Gga.1318.1.S1_s_at  | SF3B3                    |
| Gga.13183.1.S1_at   | ANK2                     |
| Gga.13185.1.S1_at   | LOC768612                |
| Gga.13193.1.S1_at   | APBB2                    |
| Gga.13197.1.A1_at   | MAST3                    |
| Gga.13197.1.S1_at   | MAST3                    |
| Gga.13205.1.S1_at   | RPS6KL1                  |
| Gga.13210.1.S1_at   | DTNBP1                   |

|                     |              |
|---------------------|--------------|
| Gga.13211.1.S1_at   | RFXAP        |
| Gga.13215.1.S1_at   | NUDT4        |
| Gga.13218.1.A1_at   | CDC37L1      |
| Gga.13218.1.S1_at   | CDC37L1      |
| Gga.1322.1.S1_a_at  | PPP3CA       |
| Gga.1322.2.A1_at    | PPP3CA       |
| Gga.13223.1.S1_at   | TTC33        |
| Gga.13224.1.S1_at   | TMEM63A      |
| Gga.13225.1.S1_at   | LOC428366    |
| Gga.1323.1.S1_at    | EXOD1        |
| Gga.13245.1.S1_at   | TATDN1       |
| Gga.13247.1.S1_at   | KIAA1841     |
| Gga.1325.1.S1_at    | TES          |
| Gga.13257.1.S1_at   | LOC421552    |
| Gga.13267.1.S1_at   | TOM1L1       |
| Gga.13269.1.S1_at   | S1PR1        |
| Gga.13271.1.S1_at   | RABGEF1      |
| Gga.13277.1.S1_s_at | SNX8         |
| Gga.1328.1.S2_at    | B2M          |
| Gga.1328.2.A1_at    | B2M          |
| Gga.13280.1.S1_at   | LOC768499    |
| Gga.13283.1.S1_at   | TXNDC13      |
| Gga.13289.1.S1_at   | ASXL3        |
| Gga.1329.1.S2_at    | ARNTL        |
| Gga.13290.1.S1_at   | RNFT1        |
| Gga.13291.1.S1_at   | OIT3         |
| Gga.13298.1.S1_at   | B4GALT6      |
| Gga.13300.1.S1_at   | ODF2         |
| Gga.13310.1.S1_at   | B4GALNT3     |
| Gga.13311.1.S1_s_at | VPS26B       |
| Gga.13312.1.S1_at   | RCJMB04_7b15 |
| Gga.13315.1.S1_at   | C1orf9       |
| Gga.13321.2.S1_a_at | PHB          |
| Gga.13323.2.A1_at   | IGF2BP3      |
| Gga.13324.1.S1_at   | BBS12        |
| Gga.13327.1.S1_s_at | C4orf18      |
| Gga.13338.1.S1_s_at | HIAT1        |
| Gga.13339.1.S1_at   | ST8SIA6      |
| Gga.13340.2.S1_a_at | COMMD9       |
| Gga.13341.1.S1_at   | LOC423270    |

|                     |              |
|---------------------|--------------|
| Gga.13342.1.S1_at   | TST          |
| Gga.13343.1.S1_at   | MESDC2       |
| Gga.1335.1.S1_at    | SLC4A2       |
| Gga.13352.1.S1_at   | ZCCHC7       |
| Gga.13354.1.S1_at   | GARNL3       |
| Gga.13354.2.S1_at   | GARNL3       |
| Gga.13356.1.S1_at   | C1orf41      |
| Gga.1336.1.S1_at    | ISG20L2      |
| Gga.13367.1.S1_at   | AMOTL2       |
| Gga.1337.1.S1_at    | LOC395787    |
| Gga.1337.2.S1_a_at  | LOC395787    |
| Gga.13373.1.S1_at   | CSGALNACT1   |
| Gga.13374.1.S1_at   | INPP5F       |
| Gga.13385.1.S1_at   | LOC430303    |
| Gga.13391.2.S1_at   | LOC417234    |
| Gga.13392.1.S1_at   | LOC415987    |
| Gga.13393.1.S1_s_at | LRCH2        |
| Gga.13399.2.S1_s_at | RCJMB04_7g14 |
| Gga.13400.1.S1_at   | ZCCHC11      |
| Gga.13403.1.S1_at   | CPSF3L       |
| Gga.13412.1.S1_at   | OSBPL2       |
| Gga.13415.1.S1_at   | ADD3         |
| Gga.1342.1.S1_at    | KIF5B        |
| Gga.13424.1.S1_at   | SCLT1        |
| Gga.13432.1.S1_s_at | R3HDM1       |
| Gga.13436.1.S1_s_at | PMM2         |
| Gga.13438.1.S1_s_at | RBM5         |
| Gga.13439.1.S1_at   | ARV1         |
| Gga.13440.1.S1_at   | RGS9         |
| Gga.13442.1.S1_at   | RDX          |
| Gga.13445.1.S1_a_at | NEXN         |
| Gga.13445.1.S1_at   | NEXN         |
| Gga.13448.1.S1_at   | OSTN         |
| Gga.1345.2.A1_at    | YTHDC2       |
| Gga.1345.2.S1_at    | YTHDC2       |
| Gga.13450.1.S1_at   | RCJMB04_5f7  |
| Gga.13466.1.S1_at   | HNRNPH3      |
| Gga.13469.1.S1_at   | LOC771290    |
| Gga.1348.1.S1_at    | ARHGAP24     |
| Gga.13481.1.S1_at   | FBXL22       |

|                     |                     |
|---------------------|---------------------|
| Gga.13484.1.S1_at   | IL15                |
| Gga.13489.1.S1_at   | C2CD2               |
| Gga.13490.1.S1_at   | CKMT1A              |
| Gga.13491.1.S1_at   | LOC770869           |
| Gga.13493.1.S1_s_at | CEP152              |
| Gga.135.3.S1_a_at   | NRG1                |
| Gga.13500.1.S1_at   | SFRS3               |
| Gga.13502.1.S1_at   | PHF11               |
| Gga.13507.1.S1_at   | LOC768787           |
| Gga.13513.1.A1_at   | RAB21               |
| Gga.13513.1.S1_at   | RAB21               |
| Gga.13515.1.S1_at   | RCJMB04_11a8        |
| Gga.13519.1.S1_s_at | RCJMB04_25m5        |
| Gga.13529.1.S1_s_at | SLC31A1             |
| Gga.1353.1.S1_at    | ROCK1               |
| Gga.13530.1.S1_s_at | NANP                |
| Gga.13531.1.S1_s_at | CCDC47              |
| Gga.13539.1.S1_at   | NPEPPS              |
| Gga.13542.1.S1_s_at | RCJMB04_1f5         |
| Gga.13544.1.S1_at   | FNDC3B              |
| Gga.1356.1.S1_at    | RDM1                |
| Gga.13564.1.S1_at   | KIAA1946            |
| Gga.13569.1.S1_at   | LOC422347           |
| Gga.13574.1.S1_at   | FSTL4               |
| Gga.13579.1.S1_at   | RCJMB04_1919        |
| Gga.13579.1.S1_s_at | RCJMB04_1919        |
| Gga.13580.1.S1_at   | NEK1                |
| Gga.13583.1.S1_at   | CD36                |
| Gga.13584.1.S1_at   | TRIO                |
| Gga.13585.1.S1_at   | FAM20A              |
| Gga.13585.1.S1_s_at | FAM20A              |
| Gga.13586.1.S1_at   | NPLOC4              |
| Gga.13589.1.S1_at   | LOC415605 /// REEP5 |
| Gga.13594.1.S1_at   | RAB31               |
| Gga.13595.1.S1_at   | MUC                 |
| Gga.13605.1.A1_at   | RPL9                |
| Gga.1361.1.S1_at    | PARP11              |
| Gga.13611.1.S1_s_at | TVA                 |
| Gga.1362.2.S1_a_at  | ZMYND8              |
| Gga.13627.1.S1_s_at | ACBD7               |

|                     |                   |
|---------------------|-------------------|
| Gga.1363.1.S1_at    | CD38              |
| Gga.13657.1.S1_s_at | UTRN              |
| Gga.1366.2.S1_a_at  | SGK269 /// TSPAN3 |
| Gga.13662.1.S1_s_at | PDCD6IP           |
| Gga.13663.1.S1_at   | FAM40B            |
| Gga.13672.1.S1_at   | RCJMB04_7n4       |
| Gga.13676.1.S1_at   | ACSM5             |
| Gga.13680.1.S1_at   | NSMCE1            |
| Gga.1369.1.S1_at    | P2RX4             |
| Gga.13691.1.S1_at   | CMTM4             |
| Gga.137.1.S1_at     | EDNRA             |
| Gga.13704.1.A1_s_at | PTPN3             |
| Gga.13708.1.S1_at   | EFHA2             |
| Gga.13730.1.S1_at   | MMP23B            |
| Gga.13736.1.S1_at   | TMEM14C           |
| Gga.1374.4.S1_x_at  | GAPDH             |
| Gga.13740.1.S1_at   | GULP1             |
| Gga.13749.1.A1_at   | HAUS8             |
| Gga.1375.2.S1_s_at  | SRP54             |
| Gga.1378.1.S1_s_at  | RCJMB04_10m2      |
| Gga.13785.1.S1_at   | HNRPLL            |
| Gga.138.1.S1_at     | EDNRB2            |
| Gga.13803.1.S1_s_at | CPA6              |
| Gga.1382.1.S1_at    | GPD1L             |
| Gga.13823.1.S1_at   | LOC425001         |
| Gga.13824.1.S1_at   | DNAH10            |
| Gga.13840.1.S1_at   | GALNT7            |
| Gga.13846.1.S1_s_at | XPO4              |
| Gga.13848.1.S1_s_at | TANC1             |
| Gga.1385.2.S1_at    | DEAF1             |
| Gga.1385.3.S1_at    | DEAF1             |
| Gga.13852.1.S1_at   | FAM73B            |
| Gga.13858.1.S1_at   | FAM69B            |
| Gga.13861.1.S1_s_at | ARMC8             |
| Gga.13865.1.S1_s_at | AHCTF1P           |
| Gga.13871.1.S1_at   | SLCO5A1           |
| Gga.13872.1.S1_s_at | KIAA1841          |
| Gga.13879.1.S1_s_at | ZNF532            |
| Gga.13883.1.S1_at   | BBS5              |
| Gga.13883.1.S1_s_at | BBS5              |

|                     |                     |
|---------------------|---------------------|
| Gga.13887.1.S1_s_at | CCDC111             |
| Gga.13891.1.S1_s_at | GLT1D1              |
| Gga.13894.1.S1_s_at | LOC415859           |
| Gga.13895.1.S1_at   | TRAK1               |
| Gga.13897.1.S1_x_at | XPC                 |
| Gga.139.1.S1_at     | TCF7                |
| Gga.13902.1.S1_at   | PWWP2A              |
| Gga.13903.1.S1_at   | PITX1               |
| Gga.13908.1.S1_at   | LOC769056           |
| Gga.13911.1.S1_at   | CD93                |
| Gga.13917.1.S1_at   | TBC1D9              |
| Gga.13935.1.S1_at   | CBS                 |
| Gga.13957.1.S1_at   | LOC417755           |
| Gga.1396.1.S1_at    | GAL8                |
| Gga.1396.2.S1_s_at  | GAL8                |
| Gga.13963.1.S1_s_at | C13orf24            |
| Gga.13970.1.S1_s_at | RBM46               |
| Gga.13978.1.S1_s_at | LHFPL5              |
| Gga.13979.1.S1_s_at | SCAPER              |
| Gga.13984.1.S1_s_at | LOC768338 /// MTFR1 |
| Gga.14.1.S1_at      | SEMA3F              |
| Gga.140.1.S1_at     | TCF7L1              |
| Gga.14001.1.S1_at   | SPAST               |
| Gga.14002.2.S1_at   | DENND4C             |
| Gga.14016.1.S1_x_at | LTBP3               |
| Gga.14021.1.S1_s_at | SCN8A               |
| Gga.14025.1.S1_at   | SAP30L              |
| Gga.14029.1.S1_at   | SLC16A12            |
| Gga.1403.1.S1_a_at  | THRSP               |
| Gga.14038.1.S1_at   | LOC419322           |
| Gga.1404.1.S1_at    | MCFD2               |
| Gga.14055.1.S1_at   | LIN28B              |
| Gga.14057.1.S1_a_at | LOC418554           |
| Gga.14064.1.S1_at   | LOC418782           |
| Gga.14068.1.S1_at   | DEPDC6              |
| Gga.14074.1.S1_s_at | MTMR12              |
| Gga.14078.1.S1_s_at | RCJMB04_34c15       |
| Gga.14081.1.S1_at   | DHCR7               |
| Gga.14122.1.S1_s_at | AHNAK2              |
| Gga.14132.1.S1_at   | ATF7IP              |



|                     |                         |
|---------------------|-------------------------|
| Gga.14146.1.S1_at   | LOC426031               |
| Gga.14152.1.S1_at   | LOC771290               |
| Gga.14154.1.S1_at   | NOM1                    |
| Gga.14157.1.S1_at   | CABLES2                 |
| Gga.14169.1.S1_at   | NHS                     |
| Gga.14179.1.S1_at   | DDEF1                   |
| Gga.14180.1.S1_at   | TNS3                    |
| Gga.14180.1.S1_s_at | TNS3                    |
| Gga.14192.1.S1_at   | LOC769469               |
| Gga.14193.1.S1_s_at | CNTNAP5                 |
| Gga.14196.1.S1_at   | ANKRD34A                |
| Gga.142.1.S1_at     | PTPRO                   |
| Gga.14209.1.S1_at   | LOC425403               |
| Gga.14210.1.S1_a_at | MLF1IP                  |
| Gga.14210.2.S1_at   | MLF1IP                  |
| Gga.14211.1.S1_at   | NOTCH2                  |
| Gga.14213.1.S1_at   | LDLRAD1                 |
| Gga.14215.1.S1_s_at | FANCB                   |
| Gga.14220.1.A1_at   | MAP1A                   |
| Gga.14225.1.S1_at   | LOC427029               |
| Gga.14226.1.S1_s_at | PDE5A                   |
| Gga.14227.1.S1_at   | LOC423015               |
| Gga.14253.1.S1_at   | DUSP22                  |
| Gga.14265.1.A1_at   | RASA1                   |
| Gga.14272.1.S1_at   | MC5R                    |
| Gga.143.1.S1_at     | TGFBR1                  |
| Gga.14303.2.S1_at   | GAB2                    |
| Gga.14314.1.S1_s_at | MTMR6                   |
| Gga.14335.1.S1_at   | LOC421901               |
| Gga.14338.1.S1_at   | FGFR2                   |
| Gga.14339.1.S1_s_at | C13orf15                |
| Gga.14346.1.S1_at   | GOLGB1                  |
| Gga.14359.1.S1_a_at | LOC771050 /// LOC772231 |
| Gga.14362.1.S1_at   | RAGE                    |
| Gga.14367.1.A1_s_at | PYROXD1                 |
| Gga.14368.1.S1_at   | GNAZ                    |
| Gga.14368.2.S1_a_at | GNAZ                    |
| Gga.14388.1.S1_at   | UTS2                    |
| Gga.14392.1.S1_at   | ADCY5                   |
| Gga.14393.1.S1_s_at | PDE7B                   |

|                     |                                 |
|---------------------|---------------------------------|
| Gga.14394.1.S1_at   | CYP2R1                          |
| Gga.14397.1.S1_s_at | SPRED2 /// TNRC6A               |
| Gga.14399.1.S1_at   | GTF3C4                          |
| Gga.144.1.S1_at     | ENTPD8                          |
| Gga.14400.1.S1_at   | IFT122                          |
| Gga.14403.1.S1_s_at | DYRK2                           |
| Gga.14404.1.S1_s_at | FNBP4                           |
| Gga.14406.2.S1_a_at | LOC426829 /// LOC769984 /// LOC |
| Gga.14411.1.S1_at   | RBM12                           |
| Gga.14412.1.S1_at   | LOC422694                       |
| Gga.14413.1.S1_at   | LTV1                            |
| Gga.14416.1.S1_at   | PTEN                            |
| Gga.14417.2.S1_a_at | SLC41A1                         |
| Gga.14419.1.S1_s_at | CHORDC1                         |
| Gga.14426.1.S1_at   | LIPA                            |
| Gga.14427.1.S1_at   | LOC772054                       |
| Gga.14429.1.S1_at   | LOC776315                       |
| Gga.1443.2.S1_s_at  | MAP2K1                          |
| Gga.14432.1.S1_s_at | HMX1                            |
| Gga.14435.1.A1_at   | RCJMB04_3o20                    |
| Gga.14445.1.S1_s_at | SLC1A6                          |
| Gga.14449.1.S1_at   | PLEKHB1                         |
| Gga.14450.1.S1_at   | ARL8B                           |
| Gga.14452.1.S1_at   | CCT8                            |
| Gga.14453.1.S1_at   | LOC407087                       |
| Gga.14455.1.S1_at   | GEM                             |
| Gga.14455.1.S2_at   | GEM                             |
| Gga.14456.1.S1_at   | CLEC2D                          |
| Gga.14461.1.S1_at   | LOC426827                       |
| Gga.14463.1.S1_at   | SETD8                           |
| Gga.14466.1.S1_at   | PCDH17                          |
| Gga.14472.1.S1_at   | ACSS3                           |
| Gga.14489.1.S1_at   | LOC419032                       |
| Gga.14492.1.S1_at   | NT5C1B                          |
| Gga.145.1.S1_at     | NR2C1                           |
| Gga.14502.1.A1_at   | LOC424525                       |
| Gga.14502.1.S1_at   | COL24A1 /// LOC424525           |
| Gga.14508.1.S1_at   | DNAJB5                          |
| Gga.14509.1.S1_s_at | HERC2                           |
| Gga.14520.1.S1_at   | LOC427227                       |

|                     |              |
|---------------------|--------------|
| Gga.14530.1.S1_s_at | UBR4         |
| Gga.14535.1.S1_at   | FUK          |
| Gga.1454.1.S1_at    | LSM5         |
| Gga.14549.1.S1_at   | RCJMB04_5a10 |
| Gga.1457.1.S1_at    | HFM1         |
| Gga.14571.1.S1_s_at | HPS5         |
| Gga.14573.1.S1_at   | PPM1J        |
| Gga.14579.1.S1_at   | CUBN         |
| Gga.146.1.S2_at     | DYRK1A       |
| Gga.14605.1.S1_at   | FGD6         |
| Gga.14608.1.S1_at   | GALNT3       |
| Gga.14609.1.S1_at   | HERC4        |
| Gga.14618.1.S1_at   | DTX3L        |
| Gga.14622.1.S1_s_at | DDX51        |
| Gga.14646.1.A1_at   | DPY19L1      |
| Gga.14655.1.S1_at   | USP16        |
| Gga.14659.1.S1_at   | PMCH         |
| Gga.14664.1.S1_at   | TECPR1       |
| Gga.14683.1.S1_s_at | ADAMTSL1     |
| Gga.14691.1.S1_at   | TUFT1        |
| Gga.14700.1.A1_at   | ACTBL2       |
| Gga.14700.1.S1_at   | ACTBL2       |
| Gga.14717.1.S1_at   | TAP1         |
| Gga.14719.1.S1_at   | LOC421768    |
| Gga.14725.1.S1_at   | B4GALT6      |
| Gga.14728.1.S1_at   | LOC424623    |
| Gga.1473.1.S1_at    | JUN          |
| Gga.1475.1.S1_at    | DPM1         |
| Gga.14779.2.S1_a_at | LOC426092    |
| Gga.14784.1.S1_at   | AGPAT6       |
| Gga.1479.1.S1_at    | PTN          |
| Gga.1479.2.S1_a_at  | PTN          |
| Gga.14801.1.S1_s_at | BRWD2        |
| Gga.1482.1.S1_at    | KPNA3        |
| Gga.14834.1.S1_s_at | BRCA1        |
| Gga.14857.1.S1_at   | ATP5C1       |
| Gga.1486.1.S1_at    | GNS          |
| Gga.14869.1.S1_at   | VPS13B       |
| Gga.1487.1.S2_at    | EIF2S2       |
| Gga.14876.1.S1_s_at | SMURF2       |

|                     |                     |
|---------------------|---------------------|
| Gga.14884.1.S1_at   | CCDC88A             |
| Gga.14884.1.S1_s_at | CCDC88A             |
| Gga.14890.1.S1_at   | GPR1                |
| Gga.14901.1.S1_at   | LOC770649           |
| Gga.14902.1.S1_at   | KHDRBS2             |
| Gga.1491.1.S1_at    | RREB1               |
| Gga.14911.1.S1_at   | OXTR                |
| Gga.14915.1.A1_at   | KIF14               |
| Gga.14915.1.A1_s_at | KIF14               |
| Gga.14936.1.S1_at   | IL23R               |
| Gga.14951.1.S1_at   | PCGF5               |
| Gga.14952.1.A1_at   | SCLT1               |
| Gga.14954.1.S1_at   | NAALADL2            |
| Gga.14959.1.S1_s_at | FAM123B             |
| Gga.14960.1.A1_at   | TANC2               |
| Gga.14960.1.S1_at   | TANC2               |
| Gga.14967.1.S1_s_at | LRRC48              |
| Gga.14969.1.A1_at   | ABHD7               |
| Gga.14969.1.S1_at   | ABHD7               |
| Gga.1497.2.S1_a_at  | C21orf70            |
| Gga.14970.1.S1_at   | AGXT2L1             |
| Gga.1498.1.S1_at    | GLRX3               |
| Gga.14982.1.S1_at   | KIAA1109            |
| Gga.14983.1.S1_at   | GDE1                |
| Gga.14999.1.S1_at   | PXDN                |
| Gga.150.2.S2_at     | FLT1                |
| Gga.15002.1.S1_s_at | ZNF509              |
| Gga.15006.1.S1_at   | KIAA1333            |
| Gga.15017.1.S1_at   | ACPL2               |
| Gga.15019.1.S1_s_at | TUFT1               |
| Gga.15024.1.A1_at   | IL6                 |
| Gga.15027.1.S1_at   | SLAMF1              |
| Gga.15036.1.S1_at   | LOC419276           |
| Gga.15049.1.S1_s_at | LIMS1 /// LOC771176 |
| Gga.15061.1.S1_at   | MRGPRH              |
| Gga.1507.1.S1_at    | ISL1                |
| Gga.1507.1.S2_at    | ISL1                |
| Gga.15070.1.S1_s_at | KIAA1109            |
| Gga.15081.1.S1_at   | LOC423113           |
| Gga.15083.1.S1_at   | SLC23A3             |

|                     |            |
|---------------------|------------|
| Gga.15090.1.S1_s_at | TSHZ2      |
| Gga.1510.1.S1_s_at  | PSAT1      |
| Gga.15111.1.S1_s_at | SYNE2      |
| Gga.15114.1.S1_s_at | MYST3      |
| Gga.15119.1.S1_at   | FAM38B     |
| Gga.15137.1.S1_at   | LOC769469  |
| Gga.15140.1.S1_at   | LOC423899  |
| Gga.15142.1.S1_s_at | PGDS       |
| Gga.15143.1.A1_at   | TTN        |
| Gga.15157.1.S1_at   | MYO6       |
| Gga.15163.1.S1_at   | C7orf46    |
| Gga.15188.1.S1_at   | CNTN4      |
| Gga.15195.1.S1_at   | PPP1R10    |
| Gga.15205.1.S1_at   | TCF25      |
| Gga.15218.1.S1_at   | MFN2       |
| Gga.15221.1.S1_s_at | C17orf85   |
| Gga.15226.1.S1_s_at | C16orf14   |
| Gga.15231.1.S1_at   | C21orf70   |
| Gga.15233.1.S1_s_at | IFT88      |
| Gga.15247.1.S1_at   | PHF15      |
| Gga.15255.1.S1_s_at | JMJD1C     |
| Gga.15266.1.S1_at   | TCP11L1    |
| Gga.15268.1.S1_at   | SLC6A6     |
| Gga.15269.1.S1_at   | PKHD1      |
| Gga.1527.1.S1_at    | METTL7A    |
| Gga.15288.1.S1_at   | MYCN       |
| Gga.15296.1.S1_s_at | ERC1       |
| Gga.15305.1.S1_at   | PALLD      |
| Gga.15311.1.S1_at   | ST6GALNAC3 |
| Gga.15312.1.S1_a_at | UBAP2      |
| Gga.15313.1.S1_at   | SFRS4      |
| Gga.15314.1.S1_at   | FAM134C    |
| Gga.15314.1.S1_s_at | FAM134C    |
| Gga.15316.1.S1_s_at | STARD4     |
| Gga.15317.1.S1_at   | RAP2C      |
| Gga.15318.1.S1_x_at | RPSA       |
| Gga.15320.1.S1_at   | GNG11      |
| Gga.15322.1.S1_s_at | MAPT       |
| Gga.15327.1.S1_at   | SPG3A      |
| Gga.1533.1.S1_s_at  | RACGAP1    |

|                     |                       |
|---------------------|-----------------------|
| Gga.15330.1.S1_at   | COL4A3BP              |
| Gga.15332.1.S1_at   | C14orf121             |
| Gga.15344.1.S1_s_at | LOC425659             |
| Gga.15345.1.S1_s_at | TMEM175               |
| Gga.1535.1.S1_a_at  | NCAPH2                |
| Gga.15350.1.S1_at   | CEP55                 |
| Gga.15354.1.S1_at   | UGCG                  |
| Gga.1536.1.S1_at    | VPS54                 |
| Gga.15365.1.S1_s_at | AP2M1                 |
| Gga.15371.1.S1_at   | LOC768772             |
| Gga.15388.1.S1_at   | SLC24A6               |
| Gga.15399.1.S1_s_at | EVL                   |
| Gga.15411.1.S1_at   | FAIM2                 |
| Gga.15420.1.S1_at   | SIPA1L2               |
| Gga.15424.1.S1_at   | WDSOF1                |
| Gga.15427.2.S1_a_at | LOC420734             |
| Gga.15457.1.S1_at   | KIF27                 |
| Gga.1546.1.S1_at    | PRRX1                 |
| Gga.1546.1.S2_a_at  | PRRX1                 |
| Gga.15467.1.S1_s_at | DPH3                  |
| Gga.15490.1.S1_at   | LOC416390             |
| Gga.155.1.S1_s_at   | LGALS3                |
| Gga.1551.2.S1_a_at  | BIRC5                 |
| Gga.15510.1.S1_at   | TCP11                 |
| Gga.15518.1.S1_at   | KLHL10                |
| Gga.15543.2.S1_at   | LOC421495             |
| Gga.15567.1.S1_at   | TMPRSS2               |
| Gga.15578.1.S1_a_at | FOXN4                 |
| Gga.15580.1.S1_at   | SLC24A4               |
| Gga.15588.1.S1_at   | LOC416618             |
| Gga.15601.1.A1_at   | LOC426161             |
| Gga.15620.1.A1_at   | LOC426985             |
| Gga.1567.1.S1_a_at  | LOC772356             |
| Gga.15677.1.S1_at   | API5 /// RCJMB04_17g4 |
| Gga.157.1.S1_at     | RUNX2                 |
| Gga.15700.1.S1_at   | BHLHB2                |
| Gga.15703.1.S1_at   | NR2C2                 |
| Gga.15703.2.S1_at   | NR2C2                 |
| Gga.15703.2.S1_s_at | NR2C2                 |
| Gga.15708.1.S1_at   | TMEM184B              |

|                     |                       |
|---------------------|-----------------------|
| Gga.15709.1.S1_s_at | RCJMB04_30a20         |
| Gga.15719.1.S1_at   | THAP7                 |
| Gga.15728.1.S1_at   | RCJMB04_7f20          |
| Gga.1573.1.S1_at    | HPD                   |
| Gga.15744.1.S1_at   | SNX3                  |
| Gga.15745.1.S1_at   | PNPT1                 |
| Gga.15746.1.S1_at   | JMJD1C                |
| Gga.15754.1.S1_at   | AMD1                  |
| Gga.15762.1.S1_at   | LOC416415             |
| Gga.15772.1.S1_at   | KIF24                 |
| Gga.15784.2.S1_a_at | C6orf186              |
| Gga.15785.1.S1_at   | LYSMD2                |
| Gga.15795.1.S1_at   | UBE2V2                |
| Gga.158.1.S1_a_at   | IRF10                 |
| Gga.15801.1.S1_s_at | DTL                   |
| Gga.15803.1.S1_at   | TXNDC16               |
| Gga.15805.1.S1_at   | FLT4                  |
| Gga.15811.2.S1_s_at | N-PAC                 |
| Gga.15811.3.S1_s_at | N-PAC                 |
| Gga.15815.1.A1_at   | TRAIP                 |
| Gga.15821.1.S1_at   | LASP1                 |
| Gga.15822.1.S1_at   | ZNF318                |
| Gga.15826.1.S1_at   | RNF149                |
| Gga.15833.1.S1_at   | CEP63                 |
| Gga.1584.1.S1_s_at  | RCJMB04_25a7          |
| Gga.15842.1.S1_at   | C6orf98               |
| Gga.15843.1.S1_at   | EME1                  |
| Gga.1585.1.S2_at    | STMN2                 |
| Gga.15860.1.A1_at   | CCDC117 /// LOC769136 |
| Gga.15860.1.S1_at   | LOC416916             |
| Gga.15868.1.S1_s_at | TMEM37                |
| Gga.15873.1.S1_at   | LETM2                 |
| Gga.1588.1.S1_at    | ZDHHC14               |
| Gga.15881.1.S1_at   | ZFP106                |
| Gga.15885.1.S1_at   | SACS                  |
| Gga.15892.1.S1_at   | HMG20A                |
| Gga.159.1.S1_at     | MID1                  |
| Gga.15900.1.S1_s_at | RCJMB04_11k6          |
| Gga.15902.1.S1_s_at | ASCC3L1               |
| Gga.15903.1.S1_s_at | PDZRN3                |

|                     |                         |
|---------------------|-------------------------|
| Gga.1591.2.S1_at    | TBCCD1                  |
| Gga.15918.1.S1_at   | PPP1R14C                |
| Gga.15934.1.S1_at   | LOC428586               |
| Gga.15935.1.S1_s_at | NUP153                  |
| Gga.15943.1.S1_at   | FAM46D                  |
| Gga.15948.1.S1_at   | PATZ1                   |
| Gga.15954.1.S1_at   | GAB1                    |
| Gga.15956.1.S1_at   | LOC426275               |
| Gga.15957.1.S1_s_at | KIAA0664                |
| Gga.15961.2.S1_x_at | CEP76 /// LOC768721     |
| Gga.15975.1.S1_at   | DAK                     |
| Gga.15981.1.S1_at   | RCJMB04_6p13            |
| Gga.15982.1.S1_at   | MANBA                   |
| Gga.15983.1.S1_s_at | FXN                     |
| Gga.1599.1.S1_s_at  | PARP6                   |
| Gga.15991.1.S1_at   | LOC420501               |
| Gga.15996.1.S1_at   | LOC431243 /// LOC431477 |
| Gga.15998.1.S1_at   | COLEC12                 |
| Gga.16.1.S1_at      | GHRL                    |
| Gga.160.1.S2_at     | FSHB                    |
| Gga.16002.1.S1_at   | ENOX1                   |
| Gga.16007.1.S1_at   | TDP1                    |
| Gga.16012.1.S1_s_at | RCJMB04_20f16           |
| Gga.16014.1.S1_at   | LOC425209               |
| Gga.16019.1.S1_at   | P4HA3                   |
| Gga.16025.1.S1_at   | C3orf14                 |
| Gga.16030.1.S1_at   | TMEM220                 |
| Gga.16032.1.A1_at   | YTHDC1                  |
| Gga.16033.1.S1_at   | CHAD                    |
| Gga.16036.1.S1_at   | UACA                    |
| Gga.16038.1.S1_at   | ADIPOQ                  |
| Gga.16040.1.S1_at   | TRIO                    |
| Gga.16042.1.S1_at   | C5orf24                 |
| Gga.16045.1.S1_at   | LOC423899               |
| Gga.1605.1.S1_s_at  | RSPO3                   |
| Gga.16050.1.S1_s_at | DNAJC3                  |
| Gga.16053.1.S1_at   | RCOR3                   |
| Gga.16057.1.S1_s_at | E2F8                    |
| Gga.16063.1.S1_s_at | ABTB1                   |
| Gga.16065.1.S1_at   | SLC1A4                  |



|                     |              |
|---------------------|--------------|
| Gga.16067.1.S1_at   | CD55         |
| Gga.16080.1.S1_at   | FDXR         |
| Gga.16081.1.S1_at   | LOC769756    |
| Gga.16086.1.S1_s_at | ERCC5        |
| Gga.16087.1.S1_at   | LOC427191    |
| Gga.16089.1.S1_s_at | BTBD12       |
| Gga.1609.1.S1_at    | APOH         |
| Gga.16098.1.S1_at   | SOX5         |
| Gga.16099.1.S1_s_at | LOC426499    |
| Gga.16103.1.S1_at   | C3orf59      |
| Gga.16111.1.S1_at   | RCJMB04_5k12 |
| Gga.16115.1.S1_s_at | GPR153       |
| Gga.16117.1.A1_at   | CP           |
| Gga.16123.1.S1_at   | RAD51        |
| Gga.16126.1.S1_at   | CADPS        |
| Gga.16138.1.S1_at   | LOC421716    |
| Gga.16139.1.S1_s_at | RCJMB04_8n14 |
| Gga.16147.1.S1_at   | PITPNM3      |
| Gga.16149.1.S1_a_at | ANKMY1       |
| Gga.1615.1.S1_at    | TMTC1        |
| Gga.16164.1.S1_s_at | RAB14        |
| Gga.16181.1.S1_at   | KIAA1310     |
| Gga.16181.1.S1_s_at | KIAA1310     |
| Gga.16189.2.S1_a_at | TMCO7        |
| Gga.16194.1.S1_at   | PTPRK        |
| Gga.16196.1.S1_at   | KRT14        |
| Gga.16198.1.S1_at   | FUCA1        |
| Gga.16202.1.S1_at   | LOC415665    |
| Gga.16207.1.S1_s_at | PPP2R3A      |
| Gga.16219.1.S1_at   | RNF19B       |
| Gga.1622.1.S1_at    | MANEA        |
| Gga.16228.1.S1_at   | FAM81A       |
| Gga.16229.1.A1_at   | PDAP1        |
| Gga.1623.1.S1_at    | N6AMT2       |
| Gga.16230.2.S1_a_at | KCTD3        |
| Gga.16233.1.S1_x_at | MYO9A        |
| Gga.16242.1.S1_at   | CPEB2        |
| Gga.16243.1.S1_at   | SCOC         |
| Gga.16250.1.S1_a_at | LOC418218    |
| Gga.16252.1.S1_at   | RCBTB1       |

|                     |                                 |
|---------------------|---------------------------------|
| Gga.16258.1.S1_at   | CTTN                            |
| Gga.16267.1.S1_at   | LOC769497                       |
| Gga.16267.1.S1_s_at | LOC417053 /// LOC417057 /// LOC |
| Gga.16272.1.S1_s_at | C6orf62                         |
| Gga.16281.1.S1_s_at | VPS8                            |
| Gga.16282.1.S1_at   | LOC769088                       |
| Gga.16287.1.S1_at   | PHF14                           |
| Gga.16288.1.S1_at   | LOC427227                       |
| Gga.16290.1.S1_at   | LOC425011                       |
| Gga.16294.1.S1_a_at | SEC61A2                         |
| Gga.16294.2.S1_s_at | SEC61A2                         |
| Gga.16296.1.S1_at   | AGPAT3 /// LOC777139            |
| Gga.16298.1.S1_s_at | SECISBP2                        |
| Gga.1630.1.S1_x_at  | MAPK10                          |
| Gga.16301.1.S1_at   | LOC419693                       |
| Gga.16302.2.S1_s_at | STK10                           |
| Gga.16307.1.S1_at   | MTMR9                           |
| Gga.16313.1.S1_s_at | DIP2B                           |
| Gga.16314.1.S1_at   | KIAA1913                        |
| Gga.16320.1.S1_s_at | WDFY1                           |
| Gga.16321.2.S1_at   | LOC420382                       |
| Gga.16325.1.S1_at   | LOC426128                       |
| Gga.16334.1.S1_s_at | ABHD13                          |
| Gga.16335.1.S1_s_at | DENND4C                         |
| Gga.16336.1.S1_at   | CDC2L2                          |
| Gga.16339.1.S1_at   | LOC422221                       |
| Gga.16349.2.S1_a_at | LOC415511                       |
| Gga.16350.1.S1_at   | TLOC1                           |
| Gga.16352.1.S1_at   | LOC427301                       |
| Gga.16354.1.S1_s_at | ATG4B                           |
| Gga.16354.1.S2_s_at | ATG4B                           |
| Gga.16356.1.S1_at   | NOTCH1                          |
| Gga.1636.1.A1_s_at  | RCJMB04_23h2                    |
| Gga.16365.1.S1_at   | SPIRE1                          |
| Gga.16366.1.S1_s_at | AMDHD2                          |
| Gga.16369.1.S1_at   | KIAA1109                        |
| Gga.16370.1.S1_s_at | TMEM220                         |
| Gga.16371.1.S1_s_at | STT3A                           |
| Gga.16378.1.S1_at   | ASB5                            |
| Gga.16385.1.S1_s_at | KIAA0368                        |

|                     |                            |
|---------------------|----------------------------|
| Gga.16394.1.S1_at   | C4 /// CYP21               |
| Gga.164.1.S1_s_at   | NR2C2                      |
| Gga.16416.1.S1_at   | RCJMB04_11d23              |
| Gga.16417.1.S1_at   | USP24                      |
| Gga.16420.1.S1_at   | RCJMB04_6i4                |
| Gga.16422.1.S1_at   | C10orf72                   |
| Gga.16425.1.S1_at   | IRF2BP2                    |
| Gga.16427.1.S1_at   | USP14                      |
| Gga.16429.1.S1_s_at | TRIM35                     |
| Gga.16430.1.S1_at   | LOC423474                  |
| Gga.16439.1.S1_at   | SMOC1                      |
| Gga.16442.1.S1_at   | LOC771481                  |
| Gga.16443.1.S1_s_at | PRDM11                     |
| Gga.16444.1.S1_at   | PDK4                       |
| Gga.16445.1.S1_a_at | LOC769733                  |
| Gga.16446.1.S1_s_at | NHEDC2                     |
| Gga.1645.1.S1_s_at  | RCJMB04_5m7                |
| Gga.16457.1.S1_s_at | IFIH1                      |
| Gga.16458.1.S1_at   | SPATA17                    |
| Gga.16461.3.S1_s_at | RBM7                       |
| Gga.16476.1.S1_at   | DYNLT3                     |
| Gga.16484.1.S1_at   | CISD2                      |
| Gga.16487.1.S1_s_at | RASA3                      |
| Gga.16489.1.S1_at   | C5orf30                    |
| Gga.16491.2.S1_at   | LOC769173 /// RCJMB04_1o21 |
| Gga.16494.1.S1_at   | LOC768787                  |
| Gga.16494.1.S1_s_at | LOC768787                  |
| Gga.16497.1.S1_at   | LOC421506                  |
| Gga.165.1.S1_at     | SOX1                       |
| Gga.1650.1.S1_at    | LOC428459                  |
| Gga.16501.1.S1_at   | DNASE2B                    |
| Gga.16512.1.S1_at   | FAM65A                     |
| Gga.1652.1.S1_at    | SMPD3                      |
| Gga.16521.1.S1_s_at | WDR44                      |
| Gga.16523.1.S2_s_at | ATP2A3                     |
| Gga.16527.1.S1_at   | MTX3                       |
| Gga.16533.1.S1_at   | DBNL                       |
| Gga.16546.1.A1_at   | MIA3                       |
| Gga.16546.1.S1_at   | MIA3                       |
| Gga.16550.1.S1_at   | LOC416500                  |

|                     |                         |
|---------------------|-------------------------|
| Gga.16552.1.S1_a_at | LOC421780               |
| Gga.16552.2.S1_a_at | LOC421780               |
| Gga.16553.1.S1_at   | CD81                    |
| Gga.16554.2.S1_a_at | LAPTM4B                 |
| Gga.16556.1.S1_at   | SPATA18                 |
| Gga.16559.1.S1_at   | SUCLG1                  |
| Gga.16560.2.S1_a_at | MCL1                    |
| Gga.16563.1.S1_at   | ATRX                    |
| Gga.16574.1.S1_at   | RCJMB04_11a3            |
| Gga.16577.1.S1_at   | HEPH                    |
| Gga.16581.1.S1_at   | GRAMD3                  |
| Gga.16583.1.S1_at   | CUL1                    |
| Gga.16585.1.S1_at   | C15orf41                |
| Gga.16586.1.S1_at   | BAAT                    |
| Gga.16596.1.S1_at   | PID1                    |
| Gga.16601.1.S1_at   | TCBA1                   |
| Gga.16601.1.S1_at   | TCBA1                   |
| Gga.16606.1.S1_at   | ARL4C                   |
| Gga.1661.1.S1_at    | RCJMB04_7b13            |
| Gga.16616.1.S1_at   | ODF1                    |
| Gga.16621.1.S1_at   | LOC417168               |
| Gga.16624.1.S1_at   | BRD8                    |
| Gga.16625.1.S1_at   | TPPP2                   |
| Gga.1663.1.S1_s_at  | LHFP                    |
| Gga.16632.1.S1_at   | LRRC67                  |
| Gga.16633.1.S1_at   | LOC419830               |
| Gga.16635.1.S1_at   | SPAG4                   |
| Gga.16637.1.S1_at   | CYB5D2                  |
| Gga.16651.1.S1_s_at | LOC415795               |
| Gga.16656.1.S1_at   | LOC416530 /// LOC770733 |
| Gga.16660.2.S1_at   | PHF5A                   |
| Gga.16660.3.S1_at   | PHF5A                   |
| Gga.16660.3.S1_s_at | PHF5A                   |
| Gga.16663.1.S1_at   | C4                      |
| Gga.16663.1.S1_s_at | C4                      |
| Gga.16665.1.S1_at   | EEPD1                   |
| Gga.16670.2.S1_s_at | DCK                     |
| Gga.16674.1.S1_at   | LOC427419               |
| Gga.16679.1.S1_at   | RCJMB04_9b7             |
| Gga.16682.1.S1_at   | MAGI2                   |

|                     |                      |
|---------------------|----------------------|
| Gga.16685.1.S1_at   | FNTA                 |
| Gga.16689.1.S1_s_at | PARVB                |
| Gga.16697.1.S1_s_at | CLDND1               |
| Gga.16702.1.S1_at   | PTPN5                |
| Gga.16708.1.S1_at   | NOL11                |
| Gga.16715.1.S1_at   | EVI5                 |
| Gga.16721.1.S1_at   | LOC423369            |
| Gga.16722.1.S1_at   | SRGAP1               |
| Gga.16731.1.S1_at   | LOC769088            |
| Gga.16732.1.S1_at   | NOVA1                |
| Gga.16744.1.S1_at   | GCAT                 |
| Gga.1675.1.S1_at    | MEGF9                |
| Gga.16752.1.S1_at   | TUSC2                |
| Gga.16753.1.S1_s_at | TARDBP               |
| Gga.16754.1.S1_at   | LOC427412            |
| Gga.16755.1.S1_s_at | LOC770146 /// TAF3   |
| Gga.16767.1.S1_s_at | KLF6                 |
| Gga.16768.1.S1_at   | LOC769351            |
| Gga.16786.1.S1_at   | ELF1                 |
| Gga.16788.1.S1_at   | KIAA0082             |
| Gga.16793.1.S1_s_at | PDS5A                |
| Gga.16794.1.S1_s_at | RCJMB04_1f5          |
| Gga.1680.1.A1_at    | FGFR2                |
| Gga.16806.3.S1_at   | HOMER3               |
| Gga.16806.4.S1_a_at | HOMER3               |
| Gga.16807.1.S1_at   | CREB3L2              |
| Gga.16807.1.S1_s_at | CREB3L2              |
| Gga.1682.1.S1_a_at  | LOC417447            |
| Gga.16827.1.S1_at   | LOC771158            |
| Gga.16830.1.S1_at   | MASP2                |
| Gga.16831.1.S1_at   | CDH8                 |
| Gga.16837.1.S1_at   | NIPBL                |
| Gga.16838.1.S1_at   | SPCS2                |
| Gga.16839.1.S1_at   | STX1A                |
| Gga.1684.1.S1_at    | C14orf149            |
| Gga.16840.1.S1_s_at | RCJMB04_32c9         |
| Gga.16843.1.S1_s_at | LOC769938 /// SEPHS1 |
| Gga.16844.2.S1_s_at | COL3A1               |
| Gga.16846.1.S1_s_at | C20orf194            |
| Gga.16852.1.S1_at   | ZADH1                |

|                     |                       |
|---------------------|-----------------------|
| Gga.16860.1.S1_at   | LOC417345             |
| Gga.16863.1.S1_s_at | GAL10                 |
| Gga.1687.1.S1_at    | ALS2CR4               |
| Gga.16870.1.S1_at   | ATAD5                 |
| Gga.1688.1.S1_at    | BRUNOL6               |
| Gga.16880.1.S1_at   | GANC                  |
| Gga.16893.1.S1_at   | GLT25D2               |
| Gga.16894.1.S1_at   | SEL1L                 |
| Gga.16903.1.S1_at   | FAM122B               |
| Gga.16910.1.S1_at   | CHD9                  |
| Gga.16916.1.S1_at   | GLA                   |
| Gga.16916.2.S1_at   | GLA                   |
| Gga.16934.1.S1_at   | OBFC2A                |
| Gga.16936.1.S1_at   | EPS8L2                |
| Gga.16937.1.S1_at   | JAKMIP1               |
| Gga.1694.1.S1_at    | TTC9                  |
| Gga.16962.1.S1_at   | PIWIL1                |
| Gga.16970.1.S1_at   | GEN1                  |
| Gga.16971.1.S1_at   | LAMC1                 |
| Gga.16974.1.S1_at   | CABP1                 |
| Gga.16978.1.S1_at   | KLHL29                |
| Gga.16986.1.S1_at   | LOC415871             |
| Gga.16991.2.S1_a_at | ADHFE1                |
| Gga.16992.1.S1_at   | SMC6                  |
| Gga.16995.1.S1_at   | LOC424473             |
| Gga.16998.1.S1_at   | SLC24A5               |
| Gga.17001.1.S1_at   | OXR1                  |
| Gga.17002.1.S1_at   | LOC418362             |
| Gga.17004.1.S1_at   | ST3GAL5               |
| Gga.17006.1.S1_s_at | ARHGEF10              |
| Gga.17007.1.A1_at   | HIAT1                 |
| Gga.17007.1.S1_at   | HIAT1                 |
| Gga.17013.1.S1_at   | FAM136A /// LOC426296 |
| Gga.17017.1.S1_at   | KIAA0753              |
| Gga.17025.1.S1_at   | GPM6B                 |
| Gga.17034.1.S1_s_at | YPEL2                 |
| Gga.17040.2.S1_a_at | FGF2                  |
| Gga.17046.1.S1_at   | LONRF3                |
| Gga.17051.1.S1_at   | GALNTL1               |
| Gga.17053.1.S1_s_at | RCJMB04_27114         |

|                     |               |
|---------------------|---------------|
| Gga.17061.1.S1_s_at | ABCC1         |
| Gga.17062.1.S1_s_at | ZNF644        |
| Gga.17063.1.S1_s_at | RCJMB04_27k21 |
| Gga.17067.1.S1_at   | ALG9          |
| Gga.1707.1.S1_at    | CAPN1         |
| Gga.17073.1.S1_at   | SLC25A32      |
| Gga.17077.1.S1_s_at | SYNE2         |
| Gga.17086.1.S1_at   | LOC771537     |
| Gga.17089.1.S1_at   | C8orf41       |
| Gga.17090.1.S1_s_at | SCIN          |
| Gga.171.1.S1_s_at   | NR3C1         |
| Gga.17104.1.S1_at   | BCL2L15       |
| Gga.17114.2.S1_a_at | HLF           |
| Gga.17129.1.S1_at   | PRMT8         |
| Gga.17133.1.S1_s_at | DOCK3         |
| Gga.17143.1.S1_s_at | MESDC2        |
| Gga.17144.1.S1_s_at | TMED2         |
| Gga.17147.1.S1_s_at | CCDC127       |
| Gga.17156.1.S1_at   | ALG14         |
| Gga.17166.1.S1_at   | TRAIL-LIKE    |
| Gga.1717.1.S1_at    | IFITM5        |
| Gga.17174.1.S1_at   | FN3K          |
| Gga.17178.1.S1_at   | LOC416622     |
| Gga.17186.1.S1_at   | PLEKHK1       |
| Gga.172.1.S1_a_at   | EPHA1         |
| Gga.1720.1.S1_at    | BCAR1         |
| Gga.17202.1.S1_s_at | WWC1          |
| Gga.17216.1.S1_s_at | RRAGC         |
| Gga.17219.1.S1_at   | EFHA2         |
| Gga.1722.1.S1_at    | TMEM49        |
| Gga.17228.2.S1_s_at | SLC25A24      |
| Gga.17232.1.S1_at   | SGK269        |
| Gga.17234.1.S1_at   | LOC421419     |
| Gga.17240.1.A1_at   | LEF1          |
| Gga.17249.1.S1_at   | ZNF827        |
| Gga.17253.1.S1_at   | CHPT1         |
| Gga.17263.1.S1_at   | LOC424155     |
| Gga.17269.1.S1_at   | ST6GALNAC5    |
| Gga.17276.1.S1_at   | ERBB2IP       |
| Gga.17279.1.S1_at   | ARFGAP2       |

|                     |               |
|---------------------|---------------|
| Gga.17290.1.S1_at   | BTBD3         |
| Gga.17291.1.S1_at   | C1orf168      |
| Gga.1730.1.S1_at    | SLC26A11      |
| Gga.17301.1.S1_at   | SMPDL3B       |
| Gga.17305.1.S1_s_at | SGMS1         |
| Gga.17307.1.S1_at   | NFIB          |
| Gga.17308.1.S1_s_at | DYNLL2        |
| Gga.17309.1.S1_at   | CNO           |
| Gga.17312.1.S1_at   | ZNF292        |
| Gga.17314.1.S1_at   | RCJMB04_16k12 |
| Gga.17317.1.S1_s_at | TRPV6         |
| Gga.17327.1.S1_at   | TOR1AIP1      |
| Gga.1733.1.S1_at    | DHRS2         |
| Gga.17331.2.S1_at   | LOC416414     |
| Gga.17339.1.S1_s_at | SPEN          |
| Gga.17356.1.S1_at   | SFRS8         |
| Gga.1737.1.S1_at    | SLC27A4       |
| Gga.17380.1.S1_at   | DCUN1D1       |
| Gga.17383.1.S1_at   | RCJMB04_8f10  |
| Gga.17392.1.S1_at   | TMEM215       |
| Gga.17395.1.S1_s_at | LOC770202     |
| Gga.1740.1.S1_at    | LOC420679     |
| Gga.17410.1.S1_at   | GLCCI1        |
| Gga.17424.1.S1_at   | RLBP1L1       |
| Gga.17425.1.A1_at   | POM121        |
| Gga.17432.1.A1_at   | TBC1D22B      |
| Gga.17437.1.S1_at   | MTUS1         |
| Gga.17441.1.S1_at   | FAM101A       |
| Gga.17442.1.S1_at   | NRF1          |
| Gga.17448.1.S1_at   | USP30         |
| Gga.1746.1.S1_s_at  | LOC420108     |
| Gga.17467.1.S1_s_at | TTN           |
| Gga.17471.1.S1_at   | KIAA0319L     |
| Gga.17473.1.S1_at   | TXNDC10       |
| Gga.17473.1.S1_s_at | TXNDC10       |
| Gga.17477.1.S1_at   | ATP13A3       |
| Gga.17479.1.S1_s_at | LOC416668     |
| Gga.1748.1.S1_at    | PNPLA2        |
| Gga.17483.1.S1_at   | CABLES1       |
| Gga.17484.1.S1_at   | ANKRD13C      |



|                     |                   |
|---------------------|-------------------|
| Gga.17488.1.S1_at   | FBLN2             |
| Gga.17492.1.S1_at   | ARL13B            |
| Gga.17494.1.S1_at   | RNF14             |
| Gga.17495.1.S1_at   | ADAMTS13          |
| Gga.1750.1.S1_at    | SLC16A2           |
| Gga.17508.1.S2_at   | FSTL1             |
| Gga.17512.1.S1_at   | RCJMB04_8p1       |
| Gga.17513.1.S1_at   | PLEKHC1           |
| Gga.17515.1.S1_at   | ADNP              |
| Gga.17517.1.S1_at   | NUDT9             |
| Gga.17518.1.S1_at   | NKTR              |
| Gga.17519.1.S1_at   | UBR2              |
| Gga.17532.1.S1_at   | UPK1B             |
| Gga.17535.1.S1_at   | RHOC              |
| Gga.1754.1.S1_s_at  | YAF2              |
| Gga.17540.1.S1_at   | ACOT9             |
| Gga.1755.1.S1_at    | NEB               |
| Gga.1755.3.S1_a_at  | LOC771699 /// NEB |
| Gga.17563.1.S1_s_at | FAM76B            |
| Gga.17572.1.S1_at   | KTI12             |
| Gga.1758.1.S1_at    | ALOX5AP           |
| Gga.17580.1.S1_at   | SLAIN2            |
| Gga.17585.2.S1_a_at | HDGF              |
| Gga.17590.1.S1_s_at | RCJMB04_10k5      |
| Gga.17594.1.S1_a_at | CADM1             |
| Gga.176.1.S1_a_at   | GAL1              |
| Gga.17602.1.S1_s_at | IPO5              |
| Gga.1761.1.S1_at    | GPR116            |
| Gga.17610.1.S1_at   | CAMK2G            |
| Gga.17621.1.S1_s_at | RP2               |
| Gga.1763.1.S1_at    | WFDC1             |
| Gga.17637.1.S1_at   | LOC771258         |
| Gga.17638.1.S1_at   | ATF3              |
| Gga.17639.1.S1_s_at | GLS               |
| Gga.17642.1.S1_at   | RNF213            |
| Gga.17643.2.S1_at   | POLRMT            |
| Gga.17645.1.S1_at   | TRIP12            |
| Gga.17647.1.S1_at   | NCF2              |
| Gga.17647.1.S1_s_at | NCF2              |
| Gga.17648.1.S1_s_at | JMJD1A            |

|                     |                                 |
|---------------------|---------------------------------|
| Gga.17649.1.S1_s_at | SLC30A6                         |
| Gga.1765.1.S1_s_at  | LOC420411                       |
| Gga.17651.1.S1_s_at | SLC33A1                         |
| Gga.17653.1.S1_s_at | TMEM131                         |
| Gga.17654.1.S1_at   | LRRC40                          |
| Gga.17664.1.S1_at   | UGCG                            |
| Gga.17665.1.S1_s_at | KIAA1324L                       |
| Gga.17671.1.S1_at   | FRMD5                           |
| Gga.17676.1.S1_at   | C16orf68                        |
| Gga.17678.1.S1_x_at | LOC770627                       |
| Gga.17679.1.S1_s_at | CHIR-B5 /// CHIR-B6 /// LOC4254 |
| Gga.1768.1.S1_at    | MGAT3                           |
| Gga.177.1.A1_at     | GLIS2                           |
| Gga.17704.1.S1_at   | WFIKK2                          |
| Gga.17706.1.S1_at   | LOC770209                       |
| Gga.17720.1.A1_at   | SPEN                            |
| Gga.17726.1.S1_at   | RCJMB04_5h22                    |
| Gga.17727.1.S1_at   | SPAG16                          |
| Gga.1773.1.S1_at    | ADCY9                           |
| Gga.17731.1.S1_s_at | PPAT                            |
| Gga.1774.1.S1_at    | C9orf82                         |
| Gga.17745.1.S1_s_at | TSR1                            |
| Gga.17750.1.S1_at   | LOC421727                       |
| Gga.17752.1.A1_at   | LOC420030                       |
| Gga.17761.1.S1_at   | C6orf60                         |
| Gga.17774.1.S1_s_at | KIF5C                           |
| Gga.17782.1.S1_at   | TNFRSF13B                       |
| Gga.17799.1.S1_at   | MAGI2                           |
| Gga.178.1.S1_s_at   | GBP                             |
| Gga.1780.1.S1_at    | PUM2                            |
| Gga.17805.1.S1_at   | HNRPA3                          |
| Gga.17811.1.A1_at   | C10orf47                        |
| Gga.17821.1.A1_at   | NDFIP1                          |
| Gga.17822.1.S1_at   | KIAA1217                        |
| Gga.1783.1.S1_at    | SLCO2B1                         |
| Gga.1784.1.S1_at    | ITGA8                           |
| Gga.1784.1.S2_at    | ITGA8                           |
| Gga.17845.1.S1_at   | LOC418204                       |
| Gga.17847.1.S1_at   | LOC427288                       |
| Gga.17860.1.S1_at   | DOK7                            |

|                     |                    |
|---------------------|--------------------|
| Gga.17880.1.S1_at   | TSPAN12            |
| Gga.17888.1.S1_s_at | SH3RF1             |
| Gga.17898.1.S1_s_at | SYNE2              |
| Gga.179.1.S1_s_at   | AVR2 /// LOC427416 |
| Gga.17912.1.A1_at   | FANCA              |
| Gga.17917.1.S1_s_at | NSD1               |
| Gga.17928.1.S1_at   | SFRS11             |
| Gga.17938.1.S1_at   | CCDC91             |
| Gga.1794.1.S1_at    | NCAM1              |
| Gga.17940.1.S1_at   | ANAPC4             |
| Gga.1796.1.S1_s_at  | PLEKHB1            |
| Gga.17961.1.S1_at   | SMPD4              |
| Gga.17964.1.S1_at   | LOC418414          |
| Gga.1798.1.S1_a_at  | TSC22D1            |
| Gga.1798.3.A1_at    | TSC22D1            |
| Gga.17980.1.S1_at   | RCJMB04_3e14       |
| Gga.17980.1.S1_s_at | RCJMB04_3e14       |
| Gga.17986.1.S1_at   | FRMD4B             |
| Gga.17987.1.S1_at   | JAKMIP2            |
| Gga.1799.1.S2_at    | RPL29              |
| Gga.17993.1.S1_at   | ZC3HAV1            |
| Gga.18001.1.S1_at   | ABCB10             |
| Gga.18003.1.S1_at   | PRKACB             |
| Gga.18007.1.S1_at   | DDX49              |
| Gga.18023.1.S1_at   | LOC419171          |
| Gga.18029.1.S1_at   | LOC423731          |
| Gga.1804.1.S1_at    | SLC35B4            |
| Gga.1804.1.S1_s_at  | SLC35B4            |
| Gga.18051.1.S1_s_at | E4F1               |
| Gga.18059.1.S1_at   | PTPLA              |
| Gga.1806.1.S1_at    | SOUL               |
| Gga.18068.1.S1_s_at | FRMD1              |
| Gga.18073.1.S1_at   | ASPM               |
| Gga.18088.1.S1_at   | FKBP6              |
| Gga.1809.1.S1_at    | HSPB1              |
| Gga.18091.1.S1_at   | MTMR8              |
| Gga.18109.1.S1_at   | CNOT2              |
| Gga.18117.1.S1_at   | LCT                |
| Gga.18121.1.S1_s_at | NARG2              |
| Gga.18122.1.S1_s_at | PLXNC1             |

|                     |           |
|---------------------|-----------|
| Gga.18131.1.S1_at   | LOC429096 |
| Gga.18135.1.S1_at   | LOC426586 |
| Gga.18136.1.S1_at   | ZDHHC21   |
| Gga.1814.1.S1_at    | PUNC      |
| Gga.1815.1.S1_at    | TUBB2B    |
| Gga.18151.1.S1_at   | BNC1      |
| Gga.18156.1.S1_s_at | BCOR      |
| Gga.1816.1.S1_at    | TMEM59    |
| Gga.18161.1.S1_at   | AP3D1     |
| Gga.18163.1.S1_at   | PEX1      |
| Gga.1817.1.S1_at    | SALL1     |
| Gga.1817.1.S2_at    | SALL1     |
| Gga.1819.1.S1_at    | DIO2      |
| Gga.18194.1.S1_at   | RTEL1     |
| Gga.18195.1.S1_at   | C9orf75   |
| Gga.182.1.S1_at     | NOTCH1    |
| Gga.18223.1.S1_at   | NCOR1     |
| Gga.18227.1.S1_at   | LOC426196 |
| Gga.1823.1.S1_at    | PET112L   |
| Gga.18232.1.S1_at   | LOC768462 |
| Gga.18236.1.A1_at   | GGA2      |
| Gga.18236.1.S1_at   | GGA2      |
| Gga.1824.1.S1_at    | PGRMC1    |
| Gga.18246.1.S1_at   | KIAA2018  |
| Gga.1825.2.A1_at    | PTPLAD1   |
| Gga.18251.1.S1_at   | MSH6      |
| Gga.18251.1.S1_s_at | MSH6      |
| Gga.18266.1.S1_at   | ANKRD26   |
| Gga.18271.1.A1_at   | LOC422606 |
| Gga.18271.1.S1_at   | LOC422606 |
| Gga.18271.1.S1_s_at | HELQ      |
| Gga.1828.1.S1_at    | RAB11B    |
| Gga.18287.1.S1_at   | C14orf135 |
| Gga.183.1.S1_at     | UGT8      |
| Gga.18300.1.S1_at   | SLITRK2   |
| Gga.18316.1.S1_at   | SLC16A10  |
| Gga.18328.1.S1_at   | LOC422400 |
| Gga.18338.1.S1_s_at | OGFRL1    |
| Gga.18351.1.A1_at   | SULF1     |
| Gga.18355.1.S1_at   | LOC771883 |

|                     |               |
|---------------------|---------------|
| Gga.18365.1.S1_s_at | SOX30         |
| Gga.18391.1.S1_at   | LOC424998     |
| Gga.18393.1.S1_s_at | CADPS         |
| Gga.18398.1.S1_at   | SCUBE2        |
| Gga.184.1.S1_a_at   | CSPG5         |
| Gga.18423.1.S1_s_at | C16orf62      |
| Gga.18425.1.S1_at   | RCJMB04_9o17  |
| Gga.18429.1.S1_at   | UBASH3B       |
| Gga.18435.1.S1_at   | C10orf54      |
| Gga.18437.1.S1_at   | LOC423545     |
| Gga.1845.1.S1_at    | SPIN1         |
| Gga.18455.1.S1_at   | ABCD3         |
| Gga.18461.1.S1_s_at | PTPRF         |
| Gga.18467.1.S1_at   | MTX3          |
| Gga.18469.1.S1_s_at | DOCK8         |
| Gga.18479.1.S1_at   | RILP          |
| Gga.18492.1.A1_at   | LOC429131     |
| Gga.18496.1.S1_at   | XKR6          |
| Gga.18499.1.A1_at   | PTPRS         |
| Gga.18504.1.S1_at   | PARVA         |
| Gga.18514.1.S1_s_at | LOC422151     |
| Gga.1852.1.S1_at    | AAK1          |
| Gga.18526.1.S1_at   | ANKRD50       |
| Gga.1853.1.S1_s_at  | TCEA1         |
| Gga.18531.1.S1_s_at | LARS          |
| Gga.18533.1.S1_s_at | PLA2R1        |
| Gga.18542.1.S1_at   | MSH3          |
| Gga.18545.1.S1_at   | ADAMTS17      |
| Gga.18573.1.S1_at   | C22orf30      |
| Gga.18576.1.S1_at   | SPTLC3        |
| Gga.18579.1.S1_at   | VPS53         |
| Gga.1858.1.S1_at    | MRPL41        |
| Gga.18596.1.S1_s_at | CCDC125       |
| Gga.18602.1.S1_s_at | LCORL         |
| Gga.18613.1.S1_at   | LOC422956     |
| Gga.18623.1.S1_at   | SIRT4         |
| Gga.18629.1.S1_at   | TMCC3         |
| Gga.18647.1.S1_s_at | LOC427447     |
| Gga.18655.1.S1_at   | LOC419741     |
| Gga.18661.1.S1_at   | RCJMB04_22p10 |

|                     |               |
|---------------------|---------------|
| Gga.18667.1.S1_at   | LOC777388     |
| Gga.18677.1.S1_at   | MUC1          |
| Gga.18678.1.S1_at   | LOC426456     |
| Gga.18688.1.S1_at   | LL            |
| Gga.1869.1.S1_at    | FAM84A        |
| Gga.18694.1.S1_at   | LOC769331     |
| Gga.18696.1.S1_s_at | TMCO3         |
| Gga.18697.1.S1_s_at | FBXL10        |
| Gga.187.2.S1_a_at   | DBT           |
| Gga.18709.1.S1_at   | ARHGAP5       |
| Gga.1871.1.S1_at    | FAM96B        |
| Gga.18711.1.S1_s_at | ASPSCR1       |
| Gga.18728.1.S1_s_at | CEP192        |
| Gga.18750.1.A1_at   | CCNYL1        |
| Gga.18756.1.S1_s_at | EML1          |
| Gga.18766.1.S1_at   | FIGNL1        |
| Gga.1877.1.S1_at    | ELAVL1        |
| Gga.18770.1.S1_at   | NEIL3         |
| Gga.18773.1.A1_at   | ADAMTS15      |
| Gga.18777.1.S1_at   | LOC416689     |
| Gga.1878.1.S1_s_at  | ARCN1         |
| Gga.1879.1.S1_at    | LANCL2        |
| Gga.18814.1.S1_at   | LOC418298     |
| Gga.18831.1.S1_s_at | SLC25A28      |
| Gga.18837.1.S1_at   | SMC6          |
| Gga.1884.2.S1_s_at  | RCJMB04_16e10 |
| Gga.18854.1.S1_s_at | LOC422540     |
| Gga.18859.1.S1_at   | ACLY          |
| Gga.18862.1.S1_at   | LOC417726     |
| Gga.18880.2.S1_a_at | HSD11B1L      |
| Gga.18891.1.S1_s_at | RAB39B        |
| Gga.18894.1.S1_s_at | PDCD1         |
| Gga.18895.1.S1_s_at | SNRPD3        |
| Gga.18900.1.S1_s_at | GLCCI1        |
| Gga.18909.1.S1_s_at | MYL1          |
| Gga.1891.1.S1_at    | YES1          |
| Gga.1891.1.S2_at    | YES1          |
| Gga.18910.1.S1_at   | GNAI1         |
| Gga.18910.1.S1_s_at | GNAI1         |
| Gga.18916.1.S1_at   | NOTCH2        |

|                     |                      |
|---------------------|----------------------|
| Gga.18918.1.S1_at   | PARD3                |
| Gga.18926.2.S1_a_at | PTP4A3               |
| Gga.18928.1.S1_s_at | TNRC15               |
| Gga.18931.1.S1_at   | PTP4A1               |
| Gga.18933.1.S1_s_at | RASSF5               |
| Gga.18939.1.S1_at   | SCPEP1               |
| Gga.18942.1.S1_at   | ACSL1                |
| Gga.18945.1.S1_at   | PREX1                |
| Gga.18947.1.S1_at   | ADNP2                |
| Gga.18948.1.S1_at   | TACC1                |
| Gga.18949.1.A1_at   | USP9X                |
| Gga.1895.1.S2_at    | GABRG2               |
| Gga.18950.1.S1_s_at | VPRBP                |
| Gga.18956.1.S1_s_at | POLL                 |
| Gga.18957.1.S1_at   | MKI67                |
| Gga.18959.1.S1_at   | RCJMB04_4e14         |
| Gga.18965.1.S1_at   | GBP6                 |
| Gga.18969.1.S1_s_at | TMBIM1               |
| Gga.18970.1.S1_s_at | RBM16                |
| Gga.18974.1.S1_at   | ITPK1                |
| Gga.18980.1.S1_at   | NUAK1                |
| Gga.1899.1.S1_a_at  | NES                  |
| Gga.18993.1.S1_at   | DGKI                 |
| Gga.19.1.S1_at      | IL1B                 |
| Gga.19002.1.S1_at   | SFRS11               |
| Gga.1901.1.S1_at    | SLC29A3              |
| Gga.19011.1.S1_at   | FAM134C              |
| Gga.19015.1.S1_at   | ZBTB1                |
| Gga.19016.1.S1_s_at | LOC771498 /// USP6NL |
| Gga.19019.1.S1_s_at | AMY2A                |
| Gga.19025.1.S1_at   | DUSP5                |
| Gga.19030.2.A1_a_at | ZDHHC23              |
| Gga.19037.1.S1_at   | RCJMB04_3m6          |
| Gga.19042.1.S1_s_at | CDC5L                |
| Gga.19046.1.S1_at   | IDH3A                |
| Gga.19049.1.S1_at   | IL18                 |
| Gga.19056.1.S1_at   | GAPVD1               |
| Gga.19057.1.S1_s_at | C11orf46             |
| Gga.19059.2.S1_a_at | SCRN1                |
| Gga.1906.1.S2_at    | CRISPLD1             |

|                     |               |
|---------------------|---------------|
| Gga.19075.1.S1_at   | PXDN          |
| Gga.19081.1.A1_at   | TELO2         |
| Gga.19084.1.S1_s_at | VT A1         |
| Gga.19087.1.S1_at   | RALB          |
| Gga.19093.1.S1_s_at | CDYL          |
| Gga.19094.1.S1_s_at | SLC39A6       |
| Gga.19096.1.A1_at   | ARL2BP        |
| Gga.191.3.S1_a_at   | GHSR          |
| Gga.1910.1.S1_a_at  | C6orf192      |
| Gga.19100.1.S1_at   | DGKD          |
| Gga.19105.1.S1_s_at | RCJMB04_21j12 |
| Gga.19119.1.S1_at   | ANKRD28       |
| Gga.19121.1.S1_at   | UQCC          |
| Gga.19126.1.S1_at   | METTL5        |
| Gga.1913.1.S1_s_at  | RFC1          |
| Gga.19136.1.A1_a_at | MURC          |
| Gga.19140.1.S1_at   | RBBP6         |
| Gga.19141.1.S1_at   | SNX21         |
| Gga.19142.1.S1_at   | CCNJ          |
| Gga.19146.1.S1_at   | LOC417822     |
| Gga.19150.1.S1_s_at | LOC777560     |
| Gga.19159.1.S1_at   | CACHD1        |
| Gga.19160.1.S1_s_at | SLC10A7       |
| Gga.19162.1.S1_at   | RET           |
| Gga.1917.1.S1_at    | CDH2          |
| Gga.19172.1.S1_s_at | MYNN          |
| Gga.19177.2.S1_at   | LOC425502     |
| Gga.1918.1.S2_at    | LMBR1         |
| Gga.19180.1.S1_s_at | MXI1          |
| Gga.19184.1.S1_at   | LOC427095     |
| Gga.19187.1.S1_at   | RCJMB04_21i6  |
| Gga.19188.1.S1_at   | KBTBD10       |
| Gga.19191.1.A1_at   | SEZ6L         |
| Gga.19192.1.S1_at   | LOC420915     |
| Gga.19202.1.S1_at   | LOC421229     |
| Gga.19209.1.S1_at   | LOC423724     |
| Gga.19214.1.S1_at   | ST8SIA5       |
| Gga.19219.1.S1_at   | GABPB2        |
| Gga.19224.1.S1_at   | ZXDC          |
| Gga.19228.1.S1_at   | RABGAP1       |



|                     |            |
|---------------------|------------|
| Gga.19241.1.S1_s_at | BRWD1      |
| Gga.1925.1.S1_at    | PRRX2      |
| Gga.19251.1.S1_at   | TBC1D1     |
| Gga.1926.1.S1_at    | RANBP1     |
| Gga.19267.1.S1_s_at | RBBP6      |
| Gga.1927.1.S1_at    | GADD45A    |
| Gga.19271.1.S1_at   | LOC427192  |
| Gga.19274.1.S1_s_at | LOC418221  |
| Gga.19276.1.S1_s_at | LOC422177  |
| Gga.19278.1.S1_s_at | ALDH9A1    |
| Gga.19279.1.S1_at   | CLPTM1L    |
| Gga.19287.1.S1_at   | PRPS1      |
| Gga.19288.1.S1_at   | TMEM57     |
| Gga.19294.1.S1_at   | SLC35E3    |
| Gga.19300.1.S1_at   | SLC16A2    |
| Gga.19305.1.S1_at   | RSPO3      |
| Gga.19311.1.S1_s_at | ST8SIA3    |
| Gga.19316.1.S1_at   | LOC772031  |
| Gga.19319.1.S1_at   | NELF       |
| Gga.1932.1.S1_at    | CRK        |
| Gga.19320.1.S1_at   | LOC426510  |
| Gga.19325.1.S1_at   | EPHX2      |
| Gga.19326.1.S1_at   | ZNF704     |
| Gga.19329.1.S1_at   | C10orf38   |
| Gga.1933.3.S1_at    | MRPL20     |
| Gga.19332.1.S1_s_at | MIA3       |
| Gga.19333.1.S1_at   | ST6GALNAC3 |
| Gga.19339.1.S1_at   | LOC419841  |
| Gga.1935.1.S1_at    | FADS2      |
| Gga.19350.1.S1_at   | TOR1AIP2   |
| Gga.19361.1.S1_s_at | TNRC6C     |
| Gga.19362.1.S1_at   | MYSM1      |
| Gga.19364.1.S1_at   | BMP2K      |
| Gga.19381.1.S1_s_at | NIN        |
| Gga.19387.1.S1_at   | ATXN7      |
| Gga.1939.1.S1_at    | EMP1       |
| Gga.19390.1.S1_at   | MED13      |
| Gga.19393.1.S1_s_at | CYP26C1    |
| Gga.19396.1.S1_s_at | RAB22A     |
| Gga.19397.1.S1_at   | NOL12      |

|                     |               |
|---------------------|---------------|
| Gga.194.1.S1_at     | CBL           |
| Gga.19402.1.S1_at   | LOXL3         |
| Gga.19405.1.S1_at   | LOC771307     |
| Gga.19408.1.S1_s_at | ACOT9         |
| Gga.19409.1.S1_s_at | COL4A2        |
| Gga.1941.1.S1_at    | FZD4          |
| Gga.19410.1.S1_at   | LOC772356     |
| Gga.19418.1.S1_at   | LOC418786     |
| Gga.19425.1.S1_at   | TLE3          |
| Gga.1943.1.S1_a_at  | KIAA0368      |
| Gga.19447.2.S1_s_at | LOC770705     |
| Gga.19451.1.S1_at   | RCJMB04_17j13 |
| Gga.19452.1.S1_at   | CD44          |
| Gga.19455.1.S1_at   | LOC417937     |
| Gga.19459.1.S1_s_at | CHST10        |
| Gga.19460.1.S1_at   | ANKRD32       |
| Gga.19462.1.S1_at   | SLC25A39      |
| Gga.19467.1.S1_at   | RNF34         |
| Gga.19467.1.S1_s_at | RNF34         |
| Gga.19470.1.A1_at   | CCDC73        |
| Gga.19474.1.S1_at   | MAP7D3        |
| Gga.1948.1.S1_at    | TMEM106C      |
| Gga.19481.1.S1_at   | TTN           |
| Gga.19481.2.S1_at   | TTN           |
| Gga.19481.5.S1_a_at | TTN           |
| Gga.19481.6.S1_at   | TTN           |
| Gga.19484.1.S1_at   | ERGIC2        |
| Gga.1949.1.S1_s_at  | NFYA          |
| Gga.19490.1.S1_at   | LOC777560     |
| Gga.195.1.S1_at     | GPR149        |
| Gga.1950.1.S1_at    | FAT3          |
| Gga.19507.1.S1_at   | LOC419269     |
| Gga.19508.1.S1_s_at | GAB1          |
| Gga.19511.1.S1_at   | C14orf143     |
| Gga.19514.1.S1_s_at | C20orf58      |
| Gga.19526.1.S1_at   | LOC421238     |
| Gga.1955.1.S1_s_at  | C15orf23      |
| Gga.19553.1.S1_at   | TMTC1         |
| Gga.19553.1.S1_s_at | TMTC1         |
| Gga.19558.1.S1_s_at | P2RY8         |

|                     |              |
|---------------------|--------------|
| Gga.19570.1.A1_at   | PRIC285      |
| Gga.19571.1.S1_at   | FRMPD2       |
| Gga.19575.1.A1_at   | HNRPK        |
| Gga.19575.1.S1_at   | HNRPK        |
| Gga.1958.1.S1_a_at  | CKS2         |
| Gga.19589.1.S1_at   | CCDC103      |
| Gga.19592.1.S1_at   | IVNS1ABP     |
| Gga.19593.1.S1_s_at | UQCRB        |
| Gga.1960.2.S1_a_at  | MB           |
| Gga.19602.1.S1_at   | LOC428436    |
| Gga.19613.1.S1_at   | LOC417507    |
| Gga.19619.1.S1_at   | PHF2         |
| Gga.19628.1.S1_at   | TMEM179      |
| Gga.19632.1.S1_at   | LOC777116    |
| Gga.1964.1.S1_at    | MYO10        |
| Gga.1964.1.S1_s_at  | MYO10        |
| Gga.19650.1.S1_at   | IDUA         |
| Gga.19651.1.S1_at   | PKN2         |
| Gga.19654.1.S1_at   | DCLK1        |
| Gga.19655.1.S1_at   | NOTUM        |
| Gga.19662.1.S1_at   | LOC415615    |
| Gga.19667.1.S1_at   | PREX1        |
| Gga.19669.1.S1_at   | RCJMB04_2115 |
| Gga.1967.1.S1_s_at  | FAM107B      |
| Gga.19677.1.S1_at   | DCUN1D3      |
| Gga.19678.1.A1_at   | EVL          |
| Gga.19693.1.A1_at   | LOC427846    |
| Gga.19693.1.S1_at   | LOC427846    |
| Gga.19700.1.S1_at   | FOXO3        |
| Gga.19702.1.S1_at   | ATG2B        |
| Gga.19706.1.S1_at   | UPP2         |
| Gga.19709.1.S1_s_at | F5           |
| Gga.19738.1.S1_s_at | DIAPH3       |
| Gga.19755.1.S1_at   | MOCOS        |
| Gga.19759.1.S1_at   | LOC421215    |
| Gga.19760.1.S1_at   | GPR97        |
| Gga.19774.1.A1_at   | VPS41        |
| Gga.19774.1.S1_at   | VPS41        |
| Gga.19785.1.S1_at   | CLDN15       |
| Gga.19791.1.S1_s_at | LRP12        |

|                     |                    |
|---------------------|--------------------|
| Gga.19797.1.S1_at   | C14orf32           |
| Gga.198.1.S1_at     | MMP9               |
| Gga.19815.1.S1_at   | ZZEF1              |
| Gga.19833.1.S1_at   | DIP2A              |
| Gga.1984.2.A1_a_at  | MAD2L1             |
| Gga.19866.1.S1_at   | LOC422067          |
| Gga.19867.1.S1_at   | TOX3               |
| Gga.19869.1.S1_s_at | TOE1               |
| Gga.19872.1.S1_s_at | ANAPC2             |
| Gga.19875.1.S1_at   | PLXNA2             |
| Gga.19877.1.S1_at   | MDH2               |
| Gga.19878.1.S1_at   | ARID1A             |
| Gga.19885.1.S1_at   | CCDC112            |
| Gga.1990.1.S1_at    | MRPL35             |
| Gga.19902.1.S1_at   | FAF1               |
| Gga.1991.1.S1_at    | PIGS               |
| Gga.19912.1.S1_at   | LOC427010          |
| Gga.19927.1.S1_at   | C20orf7            |
| Gga.19934.1.S1_at   | SNAI2              |
| Gga.19937.1.S1_at   | RNF207             |
| Gga.19938.1.A1_at   | MED31              |
| Gga.19939.1.S1_at   | TFF2               |
| Gga.19941.1.A1_at   | LOC769949          |
| Gga.19944.1.S1_at   | CCDC60             |
| Gga.19950.1.S1_s_at | F13A1              |
| Gga.19953.1.S1_at   | C10orf63           |
| Gga.19953.1.S1_s_at | C10orf63           |
| Gga.19955.1.S1_at   | ZDHHC3             |
| Gga.19956.1.S1_s_at | CHIA /// LOC768786 |
| Gga.19969.1.S1_at   | KIAA0430           |
| Gga.19977.1.S1_s_at | DOCK9              |
| Gga.200.2.S1_a_at   | FBN2               |
| Gga.20011.1.S1_at   | CCDC84             |
| Gga.20011.2.S1_s_at | RNF19A             |
| Gga.20014.1.S1_s_at | DNER               |
| Gga.20016.1.S1_at   | ST3GAL5            |
| Gga.20017.1.S1_s_at | TEC                |
| Gga.20018.1.S1_at   | LOC395756          |
| Gga.20038.1.S1_at   | EXOC3L             |
| Gga.20040.1.S1_at   | LOC417113          |

|                     |             |
|---------------------|-------------|
| Gga.20041.1.S1_at   | PCSK6       |
| Gga.20043.1.S1_at   | LATS1       |
| Gga.20046.1.S1_s_at | C20orf11    |
| Gga.20056.1.S1_at   | PALM2       |
| Gga.20060.1.S1_at   | ABAT        |
| Gga.20061.1.S1_at   | NINJ2       |
| Gga.20062.1.S1_s_at | SIPA1L2     |
| Gga.20064.1.S1_s_at | UNC119B     |
| Gga.20070.1.S1_at   | MAN1A1      |
| Gga.2008.2.S1_a_at  | BNIP3       |
| Gga.2010.2.S1_a_at  | TOP2A       |
| Gga.2015.1.S1_at    | ITGB1       |
| Gga.2024.1.S1_at    | MSI1        |
| Gga.2025.1.S1_at    | DNTTIP2     |
| Gga.2026.1.S1_at    | PLEKHM2     |
| Gga.2029.1.S1_at    | C13orf34    |
| Gga.2032.1.S1_at    | CDCA2       |
| Gga.2038.1.S1_at    | MAB21L2     |
| Gga.2039.1.S1_at    | HMOX1       |
| Gga.204.1.S1_at     | TMOD4       |
| Gga.2049.1.S1_at    | ERGIC1      |
| Gga.2052.2.S1_at    | PDHA1       |
| Gga.2057.1.S1_at    | C1orf83     |
| Gga.2057.2.S1_a_at  | C1orf83     |
| Gga.2058.1.S1_at    | GLS         |
| Gga.2058.1.S1_s_at  | GLS         |
| Gga.2061.1.S1_at    | GATA6       |
| Gga.2064.1.S1_a_at  | ERG         |
| Gga.2064.1.S2_at    | ERG         |
| Gga.2067.1.S1_at    | RCJMB04_9a7 |
| Gga.2070.2.S1_a_at  | ID4         |
| Gga.2081.1.S2_at    | GATA5       |
| Gga.2083.1.S1_at    | TXNL1       |
| Gga.2085.1.S1_at    | USP25       |
| Gga.2087.1.S1_s_at  | CSNK1E      |
| Gga.2087.1.S2_at    | CSNK1E      |
| Gga.2100.1.S1_s_at  | DNA2L       |
| Gga.2105.2.S1_a_at  | MPRIP       |
| Gga.2117.1.S1_at    | WDR5        |
| Gga.2119.1.S1_a_at  | LOC426015   |

|                    |                         |
|--------------------|-------------------------|
| Gga.2119.2.A1_x_at | LOC426015 /// LOC768441 |
| Gga.212.1.S1_at    | NRXN1                   |
| Gga.2124.1.S1_at   | ST14                    |
| Gga.2128.1.S1_at   | LOC768920               |
| Gga.2129.1.S1_s_at | MAP1B                   |
| Gga.2136.1.S1_at   | LOC429716               |
| Gga.2137.1.S1_s_at | ADARB1                  |
| Gga.2141.2.S1_at   | C5orf21                 |
| Gga.2144.2.S1_a_at | HSF2                    |
| Gga.2148.1.S1_at   | SLC31A1                 |
| Gga.2152.1.S1_at   | LOC395762               |
| Gga.2156.2.S1_at   | SLIT1                   |
| Gga.2163.1.S1_at   | MAPK1                   |
| Gga.2167.1.S1_at   | GNAI1                   |
| Gga.217.1.S1_x_at  | BLB1                    |
| Gga.2171.1.S1_at   | FER1L3                  |
| Gga.2172.1.S2_at   | PPP1R12B                |
| Gga.2178.2.S1_a_at | DOT1L                   |
| Gga.218.1.S1_at    | TWIST2                  |
| Gga.2183.1.S1_at   | GRTP1                   |
| Gga.2184.1.S1_at   | C5orf13                 |
| Gga.2186.1.S1_at   | GPN2                    |
| Gga.2190.2.S1_a_at | SOCS2                   |
| Gga.2200.1.S1_at   | CYR61                   |
| Gga.2210.1.S1_a_at | FKBP1B                  |
| Gga.2225.1.S1_at   | IL6ST                   |
| Gga.2239.1.S1_at   | LOC419136               |
| Gga.224.1.S1_at    | ZP1                     |
| Gga.2240.2.S1_a_at | FREQ                    |
| Gga.2250.1.S1_at   | HIRA                    |
| Gga.2253.1.S1_at   | TMEM163                 |
| Gga.226.1.S1_at    | F13A1                   |
| Gga.226.2.S1_a_at  | F13A1                   |
| Gga.227.1.S1_at    | STAR                    |
| Gga.2278.1.S1_at   | KIAA1529 /// LOC772014  |
| Gga.2283.1.S2_at   | DLL1                    |
| Gga.229.1.S1_at    | HINT1                   |
| Gga.2292.2.S1_at   | CDC37                   |
| Gga.230.1.S1_at    | LOC395425               |
| Gga.2301.1.S1_at   | APCDD1                  |

|                    |                     |
|--------------------|---------------------|
| Gga.2302.2.S1_at   | NVL                 |
| Gga.2303.1.S1_at   | RAD51               |
| Gga.2305.1.S1_at   | CXCR4               |
| Gga.2307.1.S1_at   | SETD3               |
| Gga.2309.1.S1_at   | DNAJC9              |
| Gga.2309.2.A1_s_at | DNAJC9              |
| Gga.2311.1.S1_s_at | TMCO1               |
| Gga.2320.2.S1_a_at | CENPC1              |
| Gga.2324.2.S1_at   | LAP3                |
| Gga.2325.2.S1_s_at | NUPL1               |
| Gga.2329.1.S1_at   | EYA1                |
| Gga.2330.1.S1_at   | LOC415822           |
| Gga.2337.1.S2_s_at | SP3                 |
| Gga.2345.2.S1_a_at | TRIAP1              |
| Gga.2348.1.S1_at   | LHX9                |
| Gga.2348.3.S1_a_at | LHX9                |
| Gga.2352.1.S2_at   | DAB1                |
| Gga.2356.1.S1_at   | SYBL1               |
| Gga.2356.2.S1_at   | SYBL1               |
| Gga.2361.1.S1_at   | RIC3                |
| Gga.2361.2.S1_a_at | RIC3                |
| Gga.2362.1.S1_s_at | SMCR8               |
| Gga.2364.1.S1_at   | LOC423793           |
| Gga.2364.1.S1_s_at | LOC423793           |
| Gga.2368.1.S1_at   | CCNE1 /// LOC776873 |
| Gga.2379.1.S1_at   | LOC426582           |
| Gga.238.1.S1_at    | LRRC17              |
| Gga.2381.1.S1_at   | RCJMB04_7i20        |
| Gga.2381.3.S1_at   | RCJMB04_7i20        |
| Gga.2383.1.S1_at   | ZFX                 |
| Gga.2402.1.S1_at   | CRY2                |
| Gga.2402.1.S2_at   | CRY2                |
| Gga.2402.1.S2_s_at | CRY2                |
| Gga.2406.2.S1_at   | DPY19L1             |
| Gga.2409.1.S1_at   | WDR1                |
| Gga.2422.2.S2_x_at | LOC772322           |
| Gga.2424.2.S1_a_at | B4GALT2             |
| Gga.2427.1.S1_at   | TANC1               |
| Gga.243.3.S1_a_at  | NTM                 |
| Gga.2431.1.S1_at   | C1orf115            |

|                    |                      |
|--------------------|----------------------|
| Gga.2437.1.S1_at   | GSTT1                |
| Gga.2437.1.S2_at   | GSTT1                |
| Gga.2444.1.S1_at   | MOBKL1A              |
| Gga.2449.3.S1_a_at | RANBP9               |
| Gga.245.1.S1_at    | FGF18                |
| Gga.2455.2.A1_at   | LOC421802            |
| Gga.2458.1.S1_at   | IFRD1                |
| Gga.2462.1.S1_at   | TIE1                 |
| Gga.2464.1.S1_at   | GLUL                 |
| Gga.2464.1.S2_at   | GLUL                 |
| Gga.2467.1.S1_at   | IGJ                  |
| Gga.2469.1.A1_at   | RCJMB04_14o23        |
| Gga.247.1.S1_at    | PCSK5                |
| Gga.2475.1.S1_at   | PON2                 |
| Gga.2479.1.S1_at   | ING1                 |
| Gga.2485.1.S1_s_at | PRIM2                |
| Gga.2493.2.S1_s_at | NCDN                 |
| Gga.2494.1.S2_at   | XDH                  |
| Gga.2499.1.S1_at   | CCBL2                |
| Gga.2501.2.S1_at   | UBB                  |
| Gga.2501.2.S1_x_at | UBB                  |
| Gga.2505.1.S1_s_at | RCJMB04_8l16         |
| Gga.2509.1.S1_at   | P2RY1                |
| Gga.2510.1.S1_at   | C3                   |
| Gga.2516.1.S1_at   | PTPRG                |
| Gga.2517.1.S1_at   | CHEK2                |
| Gga.2518.1.S1_at   | HSBP1                |
| Gga.252.1.S1_at    | FOXK1                |
| Gga.2523.1.S1_at   | HMGCS2               |
| Gga.2529.1.S1_a_at | IL1RL1               |
| Gga.2529.2.S1_a_at | IL1RL1               |
| Gga.253.1.S1_at    | CBF-2                |
| Gga.2531.1.S1_at   | LHFPL2 /// LOC395628 |
| Gga.2533.1.S1_s_at | GSTA3                |
| Gga.2535.2.S1_a_at | LTBP1                |
| Gga.2538.2.S1_a_at | NRP2                 |
| Gga.2543.1.S1_s_at | REPS2                |
| Gga.2547.1.S1_at   | LOC771567            |
| Gga.2549.1.S1_at   | LOC416592            |
| Gga.255.1.S1_at    | CCL4                 |



|                    |              |
|--------------------|--------------|
| Gga.2551.2.S1_a_at | LTF          |
| Gga.2551.2.S1_s_at | LTF          |
| Gga.2557.1.S1_at   | SUCLG2       |
| Gga.2558.1.S1_a_at | COL14A1      |
| Gga.256.1.S2_at    | TPD52L1      |
| Gga.2565.2.S1_s_at | UTP6         |
| Gga.2572.1.S1_at   | LAMP2        |
| Gga.2573.1.S1_at   | NRIP3        |
| Gga.2575.1.S1_at   | MFSD10       |
| Gga.2589.1.S1_at   | LOC419175    |
| Gga.260.1.S1_a_at  | CCDC86       |
| Gga.260.2.S1_a_at  | DMRT1        |
| Gga.2603.1.S1_at   | MAFB         |
| Gga.2608.1.S1_at   | DCX          |
| Gga.2609.1.S1_at   | THEX1        |
| Gga.2612.1.S1_at   | KRT19        |
| Gga.2612.2.S1_a_at | KRT19        |
| Gga.2612.2.S1_s_at | KRT19        |
| Gga.2613.1.S1_s_at | SPARC        |
| Gga.2614.1.A1_at   | TMOD1        |
| Gga.2628.1.S1_s_at | ABAT         |
| Gga.2637.1.S1_at   | MCOLN2       |
| Gga.2640.1.S1_at   | CFC1B        |
| Gga.2641.1.S1_at   | LOC424283    |
| Gga.2645.1.S1_at   | TGFBR2       |
| Gga.2647.1.S1_at   | MTMR2        |
| Gga.2648.1.S2_at   | HOXB3        |
| Gga.265.1.S1_at    | MARCO        |
| Gga.2657.1.A1_at   | LOC420153    |
| Gga.2663.1.S1_at   | FKBP9        |
| Gga.2667.1.S1_at   | SULT1C3      |
| Gga.2668.2.S1_at   | RARB         |
| Gga.2672.2.S1_s_at | RCJMB04_12b8 |
| Gga.2674.2.S1_a_at | FAM69B       |
| Gga.2674.2.S1_at   | FAM69B       |
| Gga.2679.1.S1_at   | FBLN1        |
| Gga.2680.1.S1_at   | AQP1         |
| Gga.2685.1.S2_at   | FGF13        |
| Gga.269.1.S1_at    | RUNX1T1      |
| Gga.2690.1.S1_a_at | FZD6         |

|                    |              |
|--------------------|--------------|
| Gga.2690.2.S1_a_at | FZD6         |
| Gga.2693.1.S1_at   | LARP4        |
| Gga.2694.1.S1_at   | LEF1         |
| Gga.2694.1.S2_s_at | LEF1         |
| Gga.2695.1.S1_at   | BPMS2        |
| Gga.27.1.S1_at     | RAX          |
| Gga.2700.1.S1_at   | NR6A1        |
| Gga.2707.2.S1_a_at | CLOCK        |
| Gga.2708.1.S1_at   | CLGN         |
| Gga.271.1.A1_at    | BMP1         |
| Gga.271.1.S1_at    | BMP1         |
| Gga.2713.1.S1_at   | KCNG2        |
| Gga.2715.1.S1_at   | FBXO5        |
| Gga.2722.1.S1_a_at | CKB          |
| Gga.2726.1.S1_at   | SNCA         |
| Gga.273.1.A1_at    | TCF7L2       |
| Gga.2733.1.S1_at   | CNR1         |
| Gga.2734.1.S2_at   | ALCAM        |
| Gga.2737.2.S1_at   | INTS6        |
| Gga.2741.1.S2_at   | GRIA4        |
| Gga.2742.1.S1_at   | FAM96A       |
| Gga.2743.1.S1_at   | ARHGAP21     |
| Gga.2745.1.S1_at   | COX11        |
| Gga.2747.2.S1_s_at | ZCCHC4       |
| Gga.275.2.S1_a_at  | MITF         |
| Gga.2754.1.S1_at   | ZWILCH       |
| Gga.2756.1.S1_at   | LGI1         |
| Gga.2757.1.S1_at   | SIAH1        |
| Gga.2759.1.S1_at   | ADD3         |
| Gga.276.1.S1_at    | EBF1         |
| Gga.2762.1.S1_s_at | DHX30        |
| Gga.2763.3.S1_a_at | SF3A3        |
| Gga.2764.1.S1_at   | SLC35F1      |
| Gga.2769.1.S1_at   | IL6          |
| Gga.277.1.S1_at    | SRC          |
| Gga.2770.1.S1_at   | RCJMB04_16e8 |
| Gga.2770.2.S1_s_at | RCJMB04_16e8 |
| Gga.2775.2.S1_a_at | MYO9A        |
| Gga.2776.1.S1_at   | TMEM192      |
| Gga.280.1.S1_at    | MAFK         |

|                    |                    |
|--------------------|--------------------|
| Gga.2808.1.S1_at   | C1orf102           |
| Gga.281.1.S1_at    | MAFF               |
| Gga.2810.1.S1_at   | PFKM               |
| Gga.2810.2.S1_at   | PFKL               |
| Gga.2818.1.S1_at   | ARNTL2             |
| Gga.2827.2.S1_a_at | TIMP3              |
| Gga.283.1.S1_at    | CHRNA9             |
| Gga.2830.1.S1_at   | LOC776660          |
| Gga.2832.1.S1_at   | RCJMB04_3o20       |
| Gga.2838.1.S1_at   | LOC771160          |
| Gga.2838.2.S1_a_at | CUX1 /// LOC771160 |
| Gga.284.1.S1_at    | ARBP               |
| Gga.2840.1.S1_at   | B4GALT1            |
| Gga.2841.1.S1_at   | LRRC8D             |
| Gga.2844.2.S1_s_at | STMN1              |
| Gga.2852.1.S2_at   | ACVR2A             |
| Gga.2855.1.S1_at   | HABP4              |
| Gga.2858.1.S1_s_at | PTEN               |
| Gga.2860.1.S1_a_at | SLC12A3            |
| Gga.2865.1.S1_at   | TAP2               |
| Gga.2876.1.S2_a_at | VAV3               |
| Gga.2876.2.S1_x_at | VAV3               |
| Gga.2877.2.S1_a_at | DNAJC18            |
| Gga.2877.2.S1_at   | DNAJC18            |
| Gga.2877.3.S1_s_at | DNAJC18            |
| Gga.2883.1.S1_at   | DHFR               |
| Gga.2888.1.S1_at   | FBN1               |
| Gga.2891.1.S1_s_at | RCJMB04_13h15      |
| Gga.2893.1.S1_a_at | MERTK              |
| Gga.2896.1.S1_at   | CBR1               |
| Gga.2898.1.S1_at   | SMTN               |
| Gga.2901.1.S1_s_at | ARHGAP26           |
| Gga.2901.1.S2_at   | ARHGAP26           |
| Gga.2902.1.S1_a_at | HBA2               |
| Gga.2902.1.S1_s_at | HBA2               |
| Gga.2905.1.S1_s_at | RCJMB04_18a16      |
| Gga.2909.1.S1_a_at | HBA1               |
| Gga.2909.1.S1_at   | HBA1               |
| Gga.2914.1.S1_at   | GPC4               |
| Gga.292.1.S1_at    | CENPF              |

|                    |              |
|--------------------|--------------|
| Gga.2922.1.S1_at   | LOC415303    |
| Gga.2924.3.S1_s_at | MTF1         |
| Gga.2931.1.S1_at   | RRBP1        |
| Gga.294.1.S1_at    | PHOX2B       |
| Gga.2942.2.S1_at   | LAMP2        |
| Gga.2952.1.S1_at   | CLDN3        |
| Gga.2956.1.S1_at   | IL22RA1      |
| Gga.296.1.S1_at    | CCL1         |
| Gga.2960.1.S1_at   | CASP6        |
| Gga.2964.3.S1_a_at | CCT6A        |
| Gga.2965.1.S1_at   | TIMP2        |
| Gga.2971.2.S1_at   | C3orf64      |
| Gga.2971.2.S1_s_at | AER61        |
| Gga.2977.1.S1_at   | PTPRZ1       |
| Gga.2980.1.S1_at   | IRX2         |
| Gga.2983.1.S1_at   | ODZ2         |
| Gga.2986.3.S1_a_at | RB1          |
| Gga.2992.2.S1_at   | C18orf37     |
| Gga.2996.1.S2_at   | ALDH1A2      |
| Gga.2996.2.S1_a_at | ALDH1A2      |
| Gga.3001.1.S1_at   | NISCH        |
| Gga.3003.1.S1_s_at | PRKRIP1      |
| Gga.3009.1.S1_s_at | RCJMB04_2p15 |
| Gga.302.2.S1_a_at  | FGF14        |
| Gga.3020.1.S1_at   | ACTR2        |
| Gga.3025.1.S1_at   | CREB1        |
| Gga.3029.1.S1_at   | LOC425350    |
| Gga.3030.1.S1_at   | RETSAT       |
| Gga.3033.1.S1_at   | LOC417533    |
| Gga.3037.1.S1_s_at | CHRD1        |
| Gga.3043.1.S1_at   | FNBP1L       |
| Gga.3047.1.S1_at   | EPHA5        |
| Gga.3052.1.S1_s_at | YTHDF1       |
| Gga.3053.1.S1_at   | EPHB3        |
| Gga.3060.1.S1_at   | BARX2        |
| Gga.3062.2.S1_at   | LOC423006    |
| Gga.3063.1.S1_at   | MYBPC1       |
| Gga.3066.1.S1_at   | HS1BP3       |
| Gga.3074.1.S1_a_at | C-16         |
| Gga.3074.2.S1_at   | C-16         |

|                    |               |
|--------------------|---------------|
| Gga.3075.1.S1_at   | ADAMTSL3      |
| Gga.3078.1.S1_at   | LOC430910     |
| Gga.3080.1.S1_a_at | GLG1          |
| Gga.3080.1.S2_at   | GLG1          |
| Gga.3095.1.S1_a_at | PLBD1         |
| Gga.3104.1.S1_at   | COL4A2        |
| Gga.311.1.S1_at    | FZ-8          |
| Gga.3110.1.S1_x_at | COL6A1        |
| Gga.3111.1.S2_at   | CLDN5         |
| Gga.3113.1.S1_at   | NCALD         |
| Gga.3118.1.S1_at   | DBI           |
| Gga.312.2.S1_a_at  | PRR11         |
| Gga.3125.1.S1_at   | ID2           |
| Gga.3130.2.S1_a_at | CLIP1         |
| Gga.3136.1.S1_at   | SDC3          |
| Gga.3137.1.S1_at   | PGDS          |
| Gga.3140.1.A1_at   | THSD7A        |
| Gga.3141.1.S1_at   | CNR1          |
| Gga.3143.2.S1_s_at | RCJMB04_5g5   |
| Gga.3145.3.S1_at   | RCJMB04_34k20 |
| Gga.3146.1.S1_at   | CCNB2         |
| Gga.3148.1.S1_at   | EXOC5         |
| Gga.3149.1.S1_at   | LOC395095     |
| Gga.3157.1.S1_at   | MRE11A        |
| Gga.3164.1.S1_at   | ORMDL3        |
| Gga.3168.2.S2_at   | QKI           |
| Gga.3169.1.S1_at   | CDCA3         |
| Gga.3178.1.S2_at   | DACH2         |
| Gga.318.1.S1_at    | KCNN2         |
| Gga.3180.1.S2_a_at | LFNG          |
| Gga.3185.1.S1_at   | MRPL21        |
| Gga.3187.1.S1_at   | HOXD8         |
| Gga.3193.3.S1_at   | USP10         |
| Gga.3198.1.S1_at   | RCJMB04_19f9  |
| Gga.3200.1.S1_s_at | SMC4          |
| Gga.3202.1.S1_a_at | LOC420716     |
| Gga.3204.1.S1_at   | C7orf23       |
| Gga.3209.3.S1_at   | IPMK          |
| Gga.3212.1.S1_at   | ANLN          |
| Gga.3212.2.S1_s_at | ANLN          |

|                    |                            |
|--------------------|----------------------------|
| Gga.3214.1.S1_at   | XRCC5                      |
| Gga.3216.1.S1_at   | RMND1                      |
| Gga.3217.1.S1_at   | MAN1B1                     |
| Gga.3219.1.S1_at   | FIGF                       |
| Gga.322.1.S1_at    | SPRY1                      |
| Gga.3220.1.S1_at   | HEMK1                      |
| Gga.3225.1.S1_at   | MYH11                      |
| Gga.3232.1.S1_at   | NDUFS4                     |
| Gga.3236.1.S1_at   | PHF11                      |
| Gga.3238.2.S1_a_at | NEGR1                      |
| Gga.3242.3.S1_at   | LOC769185                  |
| Gga.3247.1.S1_at   | ABL2                       |
| Gga.3250.1.S1_at   | VSNL1                      |
| Gga.3257.1.S1_at   | LCAT                       |
| Gga.3259.1.S1_at   | ANGPT2                     |
| Gga.3266.1.S1_at   | LOC425605                  |
| Gga.3271.1.S1_at   | LOC769726                  |
| Gga.3273.5.S1_x_at | B-G                        |
| Gga.3273.6.S1_a_at | B-G                        |
| Gga.3280.1.S1_at   | CBLN1                      |
| Gga.3282.5.S1_at   | MRPS16                     |
| Gga.329.1.S1_at    | HAS2                       |
| Gga.3301.1.S1_at   | ATP1B1                     |
| Gga.3303.1.S1_s_at | LOC425172 /// RCJMB04_8p20 |
| Gga.3306.1.S1_s_at | EDNRB                      |
| Gga.3309.1.S1_at   | ANKRD38                    |
| Gga.331.1.S1_at    | CYP26A1                    |
| Gga.3315.1.S1_a_at | MRPL17                     |
| Gga.3315.2.S1_a_at | MRPL17                     |
| Gga.3315.2.S1_x_at | MRPL17                     |
| Gga.3316.1.S1_s_at | HHEX                       |
| Gga.3317.1.S1_s_at | NCOA1                      |
| Gga.3323.1.S1_s_at | FABP5                      |
| Gga.3328.2.S1_a_at | C18orf21                   |
| Gga.3330.1.S1_at   | SPON1                      |
| Gga.3332.1.S1_at   | MXRA8                      |
| Gga.3337.1.S1_at   | MUC5B                      |
| Gga.3338.1.S1_at   | CAPZA2                     |
| Gga.3339.1.S1_at   | ARSH                       |
| Gga.3341.1.S1_at   | PODXL                      |

|                    |               |
|--------------------|---------------|
| Gga.3345.1.S1_at   | ATP2B1        |
| Gga.3348.2.S1_s_at | PCDH9         |
| Gga.3349.1.S2_at   | C4BPA         |
| Gga.3357.2.S1_a_at | LYG2          |
| Gga.3360.1.S1_at   | LOC776932     |
| Gga.3363.3.S1_a_at | IRF2          |
| Gga.3371.1.S1_s_at | RCJMB04_18h18 |
| Gga.3373.1.S1_at   | POPDC3        |
| Gga.3373.2.S1_at   | POPDC3        |
| Gga.3373.7.S1_a_at | POPDC3        |
| Gga.3379.2.S1_at   | SH3KBP1       |
| Gga.3379.3.S1_at   | SH3KBP1       |
| Gga.3379.3.S1_s_at | SH3KBP1       |
| Gga.3380.1.S1_at   | TRA@          |
| Gga.3383.1.S1_at   | LITAF         |
| Gga.3383.1.S2_at   | LITAF         |
| Gga.3387.1.S1_at   | ADRA1B        |
| Gga.3388.3.S1_at   | SLC34A1       |
| Gga.3398.2.S1_a_at | PITX2         |
| Gga.3399.1.S1_s_at | FCHSD2        |
| Gga.34.1.S1_at     | CACNG4        |
| Gga.3402.1.S1_a_at | OLFM1         |
| Gga.3403.1.S2_at   | GDF5          |
| Gga.3405.1.S1_at   | EPHB2         |
| Gga.341.1.S1_at    | CHRNA4        |
| Gga.3411.1.S1_at   | RCJMB04_5i17  |
| Gga.3412.1.S1_at   | CITED4        |
| Gga.3416.4.S1_a_at | HESX1         |
| Gga.3419.1.S1_at   | NRXN3         |
| Gga.3420.1.S1_at   | ZNF609        |
| Gga.3425.1.S1_at   | SCP2          |
| Gga.3427.1.S1_at   | ELAVL4        |
| Gga.343.1.S1_at    | PDLIM3        |
| Gga.344.1.S1_s_at  | PDLIM3        |
| Gga.3441.2.S1_s_at | TMEM167       |
| Gga.3441.3.S1_at   | TMEM167       |
| Gga.3444.1.S1_at   | FZD9          |
| Gga.3447.1.S1_at   | PLCD1         |
| Gga.3459.1.S1_at   | COL9A3        |
| Gga.3459.1.S2_at   | COL9A3        |

|                    |                                |
|--------------------|--------------------------------|
| Gga.3476.1.S1_at   | ETV6                           |
| Gga.3477.1.S1_at   | FGFR2                          |
| Gga.3477.1.S2_at   | FGFR2                          |
| Gga.3500.1.S1_at   | ROCK2                          |
| Gga.352.1.S1_at    | RGS20                          |
| Gga.3524.2.S1_a_at | MRPL27                         |
| Gga.3550.1.S1_at   | MYO5A                          |
| Gga.3550.1.S2_at   | LOC426524 /// LOC771580 /// MY |
| Gga.3551.1.S1_at   | SPP1                           |
| Gga.3555.1.S1_at   | SLC16A3                        |
| Gga.3572.1.S2_at   | CD44                           |
| Gga.3572.1.S2_s_at | CD44                           |
| Gga.3573.2.S1_a_at | DKK3                           |
| Gga.3575.1.S1_at   | LOC422926                      |
| Gga.358.1.S1_at    | TCRA                           |
| Gga.3580.1.S1_at   | INSR                           |
| Gga.3585.1.S2_at   | KAT2A                          |
| Gga.3595.1.S1_at   | EIF4E                          |
| Gga.3599.1.S1_at   | SEC23A                         |
| Gga.3599.2.S1_a_at | SEC23A                         |
| Gga.3599.2.S1_s_at | SEC23A                         |
| Gga.3599.3.S1_a_at | SEC23A                         |
| Gga.3599.3.S1_at   | SEC23A                         |
| Gga.3602.3.S1_x_at | LOC426458 /// LOC770857        |
| Gga.3606.1.S1_s_at | E2F4                           |
| Gga.3615.1.S1_at   | FST                            |
| Gga.3615.1.S2_at   | FST                            |
| Gga.3617.1.S1_at   | LOC415913                      |
| Gga.3621.1.S1_at   | CRYZ                           |
| Gga.3635.1.S1_at   | CTTN                           |
| Gga.3640.2.S1_a_at | KTN1                           |
| Gga.3652.1.S1_at   | CLEC3B                         |
| Gga.3659.1.S1_at   | NFE2L2                         |
| Gga.3659.1.S2_at   | NFE2L2                         |
| Gga.3665.1.S2_at   | CDH20                          |
| Gga.367.1.S1_x_at  | TRA@                           |
| Gga.3670.1.S1_at   | LOC395978                      |
| Gga.3670.2.S1_at   | TNRC15                         |
| Gga.3671.1.S1_at   | LOC396371                      |
| Gga.3672.1.S1_at   | ST3GAL1                        |



|                    |                                 |
|--------------------|---------------------------------|
| Gga.3677.1.S1_at   | CAPN2                           |
| Gga.3678.2.S1_a_at | TAF1A                           |
| Gga.3685.1.S1_at   | MYH1 /// MYH2 /// MYH3 /// MYH4 |
| Gga.3688.1.S1_at   | FABP1                           |
| Gga.3689.2.S1_a_at | HDAC4                           |
| Gga.3690.1.A1_at   | ZNF207                          |
| Gga.3690.1.S1_at   | ZNF207                          |
| Gga.3693.1.A1_at   | B-G /// LOC425214 /// LOC768349 |
| Gga.3697.1.S1_at   | LOC418200                       |
| Gga.3698.1.A1_s_at | LOC416899                       |
| Gga.3705.1.S1_at   | CENPF                           |
| Gga.3713.1.S1_at   | MBNL2                           |
| Gga.3729.1.S1_at   | CAMKK2                          |
| Gga.3738.1.S1_at   | BLNK                            |
| Gga.3739.1.S1_at   | INTS6                           |
| Gga.3743.1.S1_at   | TRIP13                          |
| Gga.3745.1.S1_at   | CPZ                             |
| Gga.375.1.S1_x_at  | TRA@                            |
| Gga.3751.1.S1_at   | RYK                             |
| Gga.3754.1.S1_a_at | HES1                            |
| Gga.3757.1.S2_at   | KCNT1                           |
| Gga.3768.1.S1_s_at | RQCD1                           |
| Gga.3773.1.S1_a_at | IL17RD                          |
| Gga.3777.1.S1_at   | SCP2                            |
| Gga.3781.1.S1_at   | ACE                             |
| Gga.3792.2.S1_a_at | TOM1                            |
| Gga.3807.1.S2_s_at | ALDH1A3                         |
| Gga.3811.1.S1_at   | BOK                             |
| Gga.3818.1.S1_at   | TNC                             |
| Gga.3820.3.S1_s_at | NASP                            |
| Gga.3823.1.S2_at   | PER2                            |
| Gga.3823.2.S1_a_at | PER2                            |
| Gga.3823.2.S1_at   | PER2                            |
| Gga.3828.1.S1_at   | EMB                             |
| Gga.3833.1.S1_s_at | PPP3R1                          |
| Gga.3834.1.S2_at   | PLEKHA2                         |
| Gga.3839.1.S1_s_at | FZD3                            |
| Gga.384.1.S1_at    | LOC395641                       |
| Gga.3848.1.S1_s_at | RCJMB04_1b4                     |
| Gga.3852.1.S2_s_at | RHOB                            |

|                    |             |
|--------------------|-------------|
| Gga.3853.1.S2_at   | ZNF622      |
| Gga.3854.1.S2_at   | CTSB        |
| Gga.3858.2.S1_a_at | PPARG       |
| Gga.3858.3.S1_a_at | PPARG       |
| Gga.386.1.S1_at    | RGS17       |
| Gga.3864.1.S1_at   | PSEN1       |
| Gga.3866.1.S1_at   | RASSF8      |
| Gga.3870.1.S1_at   | CHST10      |
| Gga.3871.1.S1_at   | GTF2H1      |
| Gga.3875.1.S1_at   | AKT1        |
| Gga.3886.1.S1_at   | DTX3L       |
| Gga.3899.1.S1_a_at | PDGFA       |
| Gga.390.1.S1_at    | CHAT2       |
| Gga.3903.1.S1_at   | CDH13       |
| Gga.3903.1.S2_at   | CDH13       |
| Gga.3904.1.S1_at   | RCJMB04_8a2 |
| Gga.3908.1.S1_at   | TAGLN       |
| Gga.391.1.S1_at    | IL10RB      |
| Gga.392.1.S1_at    | PLEK        |
| Gga.392.2.S1_a_at  | PLEK        |
| Gga.3921.1.S1_at   | EIF5B       |
| Gga.3928.1.S1_at   | HAPLN1      |
| Gga.393.1.S1_at    | ERBB4       |
| Gga.394.1.S1_at    | TMCO3       |
| Gga.3950.1.S1_at   | BMP2        |
| Gga.3952.1.S1_at   | TFDP1       |
| Gga.3953.2.S1_a_at | GPBP1L1     |
| Gga.3957.2.S1_a_at | ENAH        |
| Gga.396.1.S1_at    | TACR1       |
| Gga.3961.1.S1_at   | SMN         |
| Gga.3972.1.S1_at   | SEMA3D      |
| Gga.3972.1.S2_at   | SEMA3D      |
| Gga.3973.1.S1_at   | TWIST1      |
| Gga.3975.1.S1_at   | MINPP1      |
| Gga.398.1.S1_at    | MMP-13      |
| Gga.3982.1.S2_at   | INHBA       |
| Gga.3986.2.S1_a_at | CA2         |
| Gga.3994.3.S1_x_at | FN1         |
| Gga.40.1.S1_at     | LOC395345   |
| Gga.4003.1.S1_at   | CHAC1       |

|                    |              |
|--------------------|--------------|
| Gga.4006.1.S1_at   | PPARA        |
| Gga.4007.1.S1_at   | TCF12        |
| Gga.4012.1.S1_at   | IKZF5        |
| Gga.4017.1.S2_at   | EZR          |
| Gga.4019.1.S1_at   | TP63         |
| Gga.402.1.S1_at    | PGA5         |
| Gga.4024.1.S1_at   | MAPKAPK5     |
| Gga.403.1.S1_at    | ZP4          |
| Gga.4035.1.S1_at   | K123         |
| Gga.4037.2.A1_s_at | B-LA         |
| Gga.4037.3.S1_at   | RCJMB04_17a7 |
| Gga.4041.1.S1_a_at | TXN          |
| Gga.4041.2.S1_a_at | LOC418811    |
| Gga.4048.1.S1_at   | ID3          |
| Gga.405.1.S1_a_at  | ITPKA        |
| Gga.4051.1.S1_at   | CTGF         |
| Gga.4052.1.S1_at   | MYL9         |
| Gga.4053.1.S1_at   | EEF1A2       |
| Gga.4057.1.S1_at   | SSBP3        |
| Gga.4057.2.S1_a_at | SSBP3        |
| Gga.4061.2.S1_a_at | HMGB2        |
| Gga.4066.1.S1_at   | SMC2         |
| Gga.4067.1.S1_at   | TSN          |
| Gga.4068.1.S2_at   | RANP1        |
| Gga.4070.1.S1_at   | CSF1R        |
| Gga.4074.1.S1_s_at | KIAA1143     |
| Gga.4078.1.S1_at   | LUM          |
| Gga.4082.1.S1_at   | SMO          |
| Gga.4083.1.S1_at   | NKX-6.1      |
| Gga.4087.1.S2_at   | FZD1         |
| Gga.4088.1.S1_at   | SLITRK4      |
| Gga.409.1.S1_at    | WNT5A        |
| Gga.4090.1.S1_a_at | TNNT3        |
| Gga.4091.1.S2_a_at | MYLK         |
| Gga.4091.2.S1_a_at | MYLK         |
| Gga.4092.2.S1_at   | RCJMB04_1d5  |
| Gga.4092.2.S1_x_at | RCJMB04_1d5  |
| Gga.4094.1.A1_at   | LOC768569    |
| Gga.4094.1.S1_at   | LOC768569    |
| Gga.4096.3.S1_a_at | PVALB        |

|                     |           |
|---------------------|-----------|
| Gga.4098.1.S1_at    | CNP       |
| Gga.4099.1.S1_s_at  | LOC771156 |
| Gga.41.1.S1_at      | BCMO1     |
| Gga.4101.1.S1_at    | TM9SF3    |
| Gga.4106.1.S1_at    | SLC15A1   |
| Gga.4108.1.S2_at    | TPM1      |
| Gga.4108.4.S1_s_at  | TPM1      |
| Gga.4109.1.S1_at    | ABCB1     |
| Gga.4109.1.S2_at    | ABCB1     |
| Gga.4110.10.S1_x_at | IGLL1     |
| Gga.4110.11.S1_x_at | IGLL1     |
| Gga.4110.12.S1_a_at | IGLL1     |
| Gga.4110.4.S1_a_at  | IGLL1     |
| Gga.4110.4.S1_x_at  | IGLL1     |
| Gga.4112.1.S1_at    | APOB      |
| Gga.4114.1.S1_at    | PLG       |
| Gga.4116.1.S1_at    | CASP9     |
| Gga.4119.1.S1_at    | ALDH1A1   |
| Gga.4128.1.S2_at    | TNS1      |
| Gga.4128.3.S1_a_at  | TNS1      |
| Gga.4129.1.S1_at    | CCNA2     |
| Gga.4132.1.S1_at    | ENO2      |
| Gga.4133.1.S1_s_at  | SMAD5     |
| Gga.4134.1.S1_at    | CHRNA1    |
| Gga.4138.2.S1_at    | EIF4G2    |
| Gga.4141.1.S1_at    | MATN1     |
| Gga.4144.2.S1_at    | COPS5     |
| Gga.4144.2.S1_s_at  | COPS5     |
| Gga.415.1.S1_at     | SERPINB10 |
| Gga.4150.2.S1_a_at  | BSG       |
| Gga.4150.7.A1_a_at  | LOC770363 |
| Gga.4153.1.S2_a_at  | THY1      |
| Gga.4166.2.S1_a_at  | HMGN2     |
| Gga.4167.1.S1_x_at  | XPO7      |
| Gga.4170.1.S1_at    | AKR1B10   |
| Gga.4179.1.S1_at    | NEFM      |
| Gga.418.1.S1_x_at   | BF2       |
| Gga.4185.1.S2_at    | IFNAR1    |
| Gga.4194.1.S1_at    | OGN       |
| Gga.4195.1.A1_at    | C20orf11  |

|                    |                                 |
|--------------------|---------------------------------|
| Gga.4196.1.S1_a_at | ABLIM2                          |
| Gga.4196.1.S1_at   | ABLIM2                          |
| Gga.4196.2.S1_at   | ABLIM2                          |
| Gga.4205.2.S1_at   | RTN4                            |
| Gga.421.2.S1_a_at  | TK1                             |
| Gga.4210.1.S1_at   | MT4                             |
| Gga.4211.1.S1_at   | CRTAP                           |
| Gga.4216.1.S1_at   | MYOM2                           |
| Gga.4217.1.S1_a_at | MYH1 /// MYH2 /// MYH3          |
| Gga.4217.3.S1_at   | MYH6                            |
| Gga.4217.3.S1_x_at | MYH6                            |
| Gga.4217.4.S1_x_at | MYH2                            |
| Gga.4217.5.S1_at   | MYH2                            |
| Gga.4217.5.S1_x_at | MYH2                            |
| Gga.4217.6.S1_x_at | MYH3                            |
| Gga.4225.1.S1_at   | LECT2                           |
| Gga.424.1.S1_s_at  | VSIG1                           |
| Gga.4243.1.S1_at   | HOXA4                           |
| Gga.4257.1.S1_at   | COL6A2                          |
| Gga.427.1.S1_at    | PCBD1                           |
| Gga.4279.1.S1_s_at | LOC768616 /// LOC768663 /// PRS |
| Gga.4279.3.S1_a_at | LOC768616 /// LOC768663 /// PRS |
| Gga.4279.4.S1_a_at | LOC768616 /// LOC768663 /// PRS |
| Gga.4285.1.S1_at   | CEBPB                           |
| Gga.4288.1.S1_at   | STT3A                           |
| Gga.4291.1.S1_at   | TPH1                            |
| Gga.4292.1.S1_at   | LAMC1                           |
| Gga.4293.1.S1_at   | ASL                             |
| Gga.4296.2.S1_a_at | CLK3                            |
| Gga.4296.3.S1_a_at | CLK3                            |
| Gga.4301.1.S1_at   | CHD1                            |
| Gga.4306.1.S1_at   | DMN                             |
| Gga.4307.1.S1_at   | PVALB                           |
| Gga.4308.1.S1_at   | LOC396507                       |
| Gga.4309.1.S1_at   | SOX8                            |
| Gga.4316.1.S1_at   | PAPOLA                          |
| Gga.4317.1.S1_a_at | CACNA1B                         |
| Gga.4320.1.S1_a_at | LOC777119                       |
| Gga.4321.2.S1_s_at | NT5C3L                          |
| Gga.4329.1.S2_at   | GHR                             |

|                    |                                 |
|--------------------|---------------------------------|
| Gga.4332.1.S1_at   | HSPCB                           |
| Gga.4338.3.S1_a_at | UQCRC1                          |
| Gga.4343.1.S1_s_at | MYSM1                           |
| Gga.4348.1.S1_at   | LOC417822                       |
| Gga.4349.1.S1_s_at | SMARCB1                         |
| Gga.4349.2.S1_s_at | SMARCB1                         |
| Gga.4350.1.S2_at   | FYN                             |
| Gga.4359.1.S1_s_at | TNFSF13B                        |
| Gga.4359.1.S2_s_at | TNFSF13B                        |
| Gga.4362.1.S1_at   | IKZF3                           |
| Gga.4369.1.S1_at   | NAGA                            |
| Gga.437.1.S1_at    | TYK2                            |
| Gga.4370.2.S1_s_at | MCM6                            |
| Gga.4371.1.S1_s_at | PHTF2                           |
| Gga.4373.1.S1_s_at | CYB5R2                          |
| Gga.4374.1.S1_a_at | IRF4                            |
| Gga.4375.1.S1_at   | GTF3C3                          |
| Gga.4383.1.S1_at   | RAP1A                           |
| Gga.4384.1.S1_at   | BIRC2                           |
| Gga.4384.1.S2_at   | BIRC2                           |
| Gga.4384.1.S2_s_at | BIRC2                           |
| Gga.4390.2.S1_a_at | FTH1                            |
| Gga.4390.4.S1_a_at | FTH1                            |
| Gga.4390.4.S1_s_at | FTH1                            |
| Gga.4394.1.S1_at   | BCL2                            |
| Gga.4403.1.S1_at   | PSAP                            |
| Gga.4403.1.S2_at   | PSAP                            |
| Gga.4409.1.S1_a_at | CCL4                            |
| Gga.4412.1.S1_a_at | TAPBP                           |
| Gga.4414.1.S1_s_at | CD74                            |
| Gga.4416.1.S1_at   | SERPINI1                        |
| Gga.442.1.S1_at    | LOC395744                       |
| Gga.4420.2.S1_a_at | RTN1                            |
| Gga.4421.1.S1_x_at | UBC                             |
| Gga.4424.1.S1_at   | SH3GL3                          |
| Gga.443.1.S1_at    | LOC419978 /// LOC426838 /// LOC |
| Gga.4430.2.S1_at   | SLC35A1                         |
| Gga.4439.2.S1_at   | MAP6                            |
| Gga.444.1.S1_at    | LOC419978 /// LOC426838 /// LOC |
| Gga.4442.1.S1_at   | LOC768632 /// LOC768817 /// LOC |

|                    |              |       |
|--------------------|--------------|-------|
| Gga.4445.1.S1_at   | NR2F2        |       |
| Gga.4446.1.S3_at   | GIT2         |       |
| Gga.4447.1.S1_at   | PCK1         |       |
| Gga.445.2.S1_a_at  | LOC769232    |       |
| Gga.445.2.S1_at    | LOC769232    |       |
| Gga.4450.1.S1_s_at | C11orf61     |       |
| Gga.4454.2.S1_s_at | RCJMB04_24e7 |       |
| Gga.4459.4.S1_a_at | RPL35A       |       |
| Gga.446.1.S1_at    | ETV4         |       |
| Gga.4469.3.S1_at   | SET          |       |
| Gga.447.1.S1_s_at  | ETV5         |       |
| Gga.4471.1.S1_at   | USPL1        |       |
| Gga.4474.1.S1_s_at | RAD21        |       |
| Gga.4478.1.S1_at   | UBE2J1       |       |
| Gga.448.1.S1_at    | TJP2         |       |
| Gga.4485.2.S1_s_at | RPN2         |       |
| Gga.4485.3.S1_at   | RPN2         |       |
| Gga.449.1.S1_at    | NOG          |       |
| Gga.4493.1.S1_at   | BRCA1        |       |
| Gga.4493.1.S2_at   | BRCA1        |       |
| Gga.450.1.S1_at    | CD5          |       |
| Gga.4500.1.S2_at   | RPS28        |       |
| Gga.4511.1.S1_at   | TCIRG1       |       |
| Gga.4512.1.S1_at   | RPS14        |       |
| Gga.4514.2.S1_s_at | RRM1         |       |
| Gga.4514.3.S1_s_at | RRM1         |       |
| Gga.4515.2.S1_at   | PRDX3        |       |
| Gga.4516.2.S1_at   |              | 41163 |
| Gga.4522.2.S1_a_at | DHX15        |       |
| Gga.4533.6.A1_at   | DYNLT1       |       |
| Gga.4535.1.S1_at   | AKAP12       |       |
| Gga.4535.2.S1_a_at | AKAP12       |       |
| Gga.4536.2.S1_a_at | AKR1D1       |       |
| Gga.4544.1.S1_at   | BRG1         |       |
| Gga.4547.2.S1_a_at | MYH10        |       |
| Gga.4557.1.S1_at   | FGB          |       |
| Gga.4558.2.S1_s_at | MXD4         |       |
| Gga.4561.1.S1_at   | SEPX1        |       |
| Gga.4562.1.S1_s_at | GAL9         |       |
| Gga.4564.1.S1_a_at | FMO6P        |       |

|                    |              |
|--------------------|--------------|
| Gga.4565.3.S1_a_at | TEX264       |
| Gga.4567.1.S1_a_at | ATP5J2       |
| Gga.4567.3.S1_a_at | ATP5J2       |
| Gga.4567.4.S1_x_at | ATP5J2       |
| Gga.4577.2.S1_at   | RCJMB04_1112 |
| Gga.4579.1.S1_x_at | TUBB2A       |
| Gga.458.1.S1_at    | CDD          |
| Gga.4582.1.S1_at   | ARGLU1       |
| Gga.4583.2.S1_x_at | RPL24        |
| Gga.4583.4.A1_at   | RPL24        |
| Gga.4589.1.S1_at   | RHOBTB2      |
| Gga.4590.1.S1_s_at | LOC422090    |
| Gga.4594.1.S2_at   | ATP1B3       |
| Gga.4596.1.S1_at   | PTMS         |
| Gga.4597.1.S1_at   | TAF13        |
| Gga.4598.5.S1_a_at | PFDN1        |
| Gga.460.1.S1_at    | LHCGR        |
| Gga.4600.2.S1_at   | LOC770937    |
| Gga.4604.1.S1_at   | C10orf84     |
| Gga.4608.1.S1_at   | LOC425539    |
| Gga.4609.3.S1_a_at | PHPT1        |
| Gga.4611.1.S1_at   | METT10D      |
| Gga.462.1.S1_x_at  | APOA4        |
| Gga.462.2.S1_a_at  | APOA4        |
| Gga.4621.1.S1_s_at | TRAP1        |
| Gga.4629.1.S1_at   | LOC768360    |
| Gga.4637.1.S1_s_at | YARS         |
| Gga.464.2.A1_at    | AXIN1        |
| Gga.464.2.S1_a_at  | AXIN1        |
| Gga.4640.1.S1_at   | C19orf6      |
| Gga.4649.1.S1_s_at | PSMC3        |
| Gga.4657.1.S1_at   | RPL31        |
| Gga.4659.1.S1_at   | C19orf12     |
| Gga.4661.1.S1_x_at | TUBA1C       |
| Gga.4661.2.S1_at   | TUBA1C       |
| Gga.4663.1.S1_at   | PSPH         |
| Gga.4664.2.S1_a_at | LOC769329    |
| Gga.4668.1.S1_at   | DNER         |
| Gga.4668.2.S1_a_at | DNER         |
| Gga.467.1.S1_at    | TBX19        |



|                    |                         |
|--------------------|-------------------------|
| Gga.4672.1.S2_at   | ATP6V0A1                |
| Gga.4675.1.S1_at   | SDC2                    |
| Gga.4675.1.S2_at   | SDC2                    |
| Gga.4682.1.S1_at   | UNG                     |
| Gga.4682.1.S2_at   | UNG                     |
| Gga.4688.1.S1_at   | ACOT8                   |
| Gga.469.1.S1_at    | FOXC2                   |
| Gga.4693.1.S1_s_at | MLX                     |
| Gga.4699.2.S1_s_at | LOC415641 /// LOC423151 |
| Gga.4703.1.S1_s_at | NDFIP1                  |
| Gga.4705.2.S1_s_at | DHODH                   |
| Gga.4706.1.S1_at   | CALCOCO2                |
| Gga.4707.1.S1_at   | RNPC3                   |
| Gga.4712.2.S1_at   | OXCT1                   |
| Gga.4718.1.S1_at   | SFRS3                   |
| Gga.4719.1.S1_a_at | APOA1                   |
| Gga.4719.1.S1_s_at | APOA1                   |
| Gga.4723.1.S1_at   | LECT1                   |
| Gga.4724.1.S1_at   | HSP90B1                 |
| Gga.4724.1.S2_at   | HSP90B1                 |
| Gga.4727.1.S1_at   | RCJMB04_4k2             |
| Gga.4728.1.S1_at   | C6orf72                 |
| Gga.4729.2.S1_at   | RPL18A                  |
| Gga.4730.1.S1_at   | NAPB                    |
| Gga.4731.3.S1_at   | RCJMB04_35e13           |
| Gga.4732.1.S1_at   | LRP11                   |
| Gga.4732.3.S1_a_at | LRP11                   |
| Gga.4732.3.S1_at   | LRP11                   |
| Gga.4738.1.S1_at   | NEO1                    |
| Gga.4744.3.S1_a_at | PMPCA                   |
| Gga.4746.1.S1_a_at | NDUFB1                  |
| Gga.4747.1.S1_at   | SLC25A3                 |
| Gga.4749.1.S1_at   | HADH                    |
| Gga.475.1.S2_at    | FSHR                    |
| Gga.4750.1.S1_s_at | FKBP5                   |
| Gga.4755.2.S1_at   | HP1BP3                  |
| Gga.4755.2.S1_s_at | HP1BP3                  |
| Gga.4756.1.S1_a_at | CIRBP                   |
| Gga.4757.1.S1_at   | MAP4K4                  |
| Gga.476.1.S1_at    | TEAD3                   |

|                    |                    |
|--------------------|--------------------|
| Gga.4764.1.S1_at   | ARL1               |
| Gga.4767.1.S1_at   | NAT11              |
| Gga.4768.1.S1_at   | ETS2               |
| Gga.4769.1.S1_s_at | CUL3               |
| Gga.4773.1.S1_at   | RCJMB04_1i20       |
| Gga.4773.2.S1_s_at | RCJMB04_1i20       |
| Gga.4774.2.S1_a_at | LOC422278          |
| Gga.4776.1.S2_at   | LOC771147 /// RPL9 |
| Gga.4782.1.S1_a_at | HNRNPAB            |
| Gga.4782.1.S2_at   | HNRNPAB            |
| Gga.4785.2.S1_at   | NIT2               |
| Gga.4788.1.S1_at   | RCJMB04_8a2        |
| Gga.4789.1.S1_at   | FAM70A             |
| Gga.4791.1.S1_at   | IFI35              |
| Gga.4792.2.S1_at   | NFS1               |
| Gga.4795.2.S1_a_at | KLHDC2             |
| Gga.4798.1.S1_at   | GPM6A              |
| Gga.4799.1.S1_s_at | PPM1M              |
| Gga.48.1.S1_at     | DPF2               |
| Gga.4804.1.S1_at   | EIF3E              |
| Gga.4807.2.A1_at   | SNAP25             |
| Gga.4808.1.S1_s_at | KDM6A              |
| Gga.481.1.S1_at    | FMOD               |
| Gga.4811.3.S1_s_at | HNRPK              |
| Gga.4826.1.A1_at   | FBXO45             |
| Gga.4827.1.S2_at   | SLC25A6            |
| Gga.483.1.S1_at    | CTSK               |
| Gga.4830.1.S1_at   | SFRP1              |
| Gga.4830.1.S2_at   | SFRP1              |
| Gga.4832.1.S1_at   | LOC770612          |
| Gga.4834.3.S1_at   | RCJMB04_33p3       |
| Gga.4836.1.S1_a_at | TMEM141            |
| Gga.4836.2.S1_x_at | TMEM141            |
| Gga.4837.1.S1_at   | KERA               |
| Gga.4838.2.S1_s_at | C19orf10           |
| Gga.4839.1.S1_a_at | MDH2               |
| Gga.4842.2.S1_a_at | SLC4A1             |
| Gga.4845.1.S1_at   | LOC423265          |
| Gga.4845.3.S1_at   | LOC423265          |
| Gga.4845.3.S1_s_at | LOC423265          |

|                    |              |
|--------------------|--------------|
| Gga.4846.1.S1_at   | LOC395193    |
| Gga.4846.1.S2_at   | LOC395193    |
| Gga.4849.1.S1_at   | ELF1         |
| Gga.485.1.S1_a_at  | TEAD4        |
| Gga.485.4.S1_a_at  | TEAD4        |
| Gga.4850.2.S1_at   | GRIP1        |
| Gga.4851.1.A1_at   | COL3A1       |
| Gga.4851.1.S1_at   | COL3A1       |
| Gga.4853.1.S1_at   | C20orf149    |
| Gga.4854.1.S1_at   | LOC769345    |
| Gga.4856.1.S1_s_at | PMP22        |
| Gga.4866.2.S1_at   | RNF185       |
| Gga.4867.1.S1_a_at | TXNDC17      |
| Gga.4867.3.S1_a_at | TXNDC17      |
| Gga.4868.1.S1_a_at | PNLIP        |
| Gga.4870.3.S1_a_at | ACTC1        |
| Gga.4871.1.S1_at   | PSMC5        |
| Gga.4873.1.S1_a_at | HSPE1        |
| Gga.4874.2.S1_at   | TUBB2C       |
| Gga.4878.1.S1_at   | RPL7         |
| Gga.4879.2.S1_at   | HSP90AA1     |
| Gga.4882.1.S1_at   | ASB7         |
| Gga.4884.1.S1_at   | ANXA1        |
| Gga.4888.1.S1_s_at | PTP4A1       |
| Gga.4889.1.S1_s_at | NFASC        |
| Gga.4891.1.S1_s_at | RCJMB04_2g17 |
| Gga.4896.1.S1_at   | LOC427638    |
| Gga.49.1.S1_at     | CBX4         |
| Gga.4900.3.S1_s_at | LOC425783    |
| Gga.4900.4.S1_at   | LOC776458    |
| Gga.4900.7.S1_at   | LOC776458    |
| Gga.4907.1.S1_s_at | POU2AF1      |
| Gga.4912.1.S1_at   | G3BP1        |
| Gga.4929.1.S1_s_at | GABPB2       |
| Gga.4930.2.S1_a_at | LOC424773    |
| Gga.4931.1.S1_at   | PMS1         |
| Gga.4933.1.S1_at   | HIF1A        |
| Gga.4938.1.S1_s_at | AMY2A        |
| Gga.4939.1.S1_s_at | FABP4        |
| Gga.4940.2.S1_a_at | UBE2I        |

|                     |                                       |
|---------------------|---------------------------------------|
| Gga.4942.1.S1_at    | HSP70                                 |
| Gga.4948.1.S1_at    | FKBP1A                                |
| Gga.4949.1.S1_at    | SREBF2                                |
| Gga.495.1.S1_at     | GAL2                                  |
| Gga.4955.1.S1_at    | FRZB                                  |
| Gga.4956.1.S1_at    | LEFTY2                                |
| Gga.4958.1.S1_at    | XIRP2                                 |
| Gga.4964.1.S1_a_at  | LOC776590                             |
| Gga.4964.1.S1_x_at  | LOC776590                             |
| Gga.4964.11.S1_a_at | LOC776309 /// LOC776590               |
| Gga.4964.11.S1_x_at | LOC776309 /// LOC776590               |
| Gga.4964.17.S1_x_at | LOC776590                             |
| Gga.4964.2.S1_a_at  | LOC776306 /// LOC776590               |
| Gga.4964.20.S1_x_at | LOC776590 /// LOC777160               |
| Gga.4964.22.S1_x_at | LOC776593                             |
| Gga.4964.25.S1_x_at | LOC776574 /// LOC776590 /// LOC776593 |
| Gga.4964.3.S1_x_at  | LOC776590                             |
| Gga.4964.30.A1_at   | LOC776574                             |
| Gga.4964.35.S1_x_at | LOC776574 /// LOC776590               |
| Gga.4964.36.S1_x_at | LOC776574 /// LOC776590               |
| Gga.4964.4.S1_at    | LOC428465 /// LOC776593               |
| Gga.4964.4.S1_x_at  | LOC428465 /// LOC776593               |
| Gga.4964.47.S1_x_at | LOC776590 /// LOC777160               |
| Gga.4964.5.S1_a_at  | LOC776306 /// LOC776590               |
| Gga.4964.54.A1_x_at | LOC776574                             |
| Gga.4964.54.S1_x_at | LOC776574 /// LOC776590 /// LOC776593 |
| Gga.4965.1.S1_a_at  | COL12A1                               |
| Gga.4972.1.S1_at    | PTPRA                                 |
| Gga.4972.1.S1_s_at  | PTPRA                                 |
| Gga.4973.1.S1_x_at  | BF2                                   |
| Gga.4973.2.S1_x_at  | BF1 /// BF2 /// HLA-G                 |
| Gga.4973.3.S1_x_at  | BF1 /// BF2 /// HLA-G                 |
| Gga.4974.1.S1_at    | VCAN                                  |
| Gga.4974.1.S2_at    | VCAN                                  |
| Gga.4975.1.S1_a_at  | TPM3                                  |
| Gga.4975.2.S1_a_at  | TPM3                                  |
| Gga.4975.5.S1_a_at  | TPM3                                  |
| Gga.4975.5.S1_x_at  | TPM3                                  |
| Gga.4977.1.S1_at    | MSX2                                  |
| Gga.4978.2.S1_a_at  | CALB2                                 |

|                    |                                 |
|--------------------|---------------------------------|
| Gga.4979.1.S1_at   | TCF3                            |
| Gga.4980.1.S1_at   | ADORA1                          |
| Gga.4981.1.S1_s_at | HBG1 /// HBG2                   |
| Gga.4981.2.S1_at   | HBE1 /// HBG2                   |
| Gga.4982.1.S1_at   | LOC395492                       |
| Gga.4984.1.S1_at   | TNNT2                           |
| Gga.4985.1.S1_a_at | HDAC1                           |
| Gga.4986.1.S1_at   | MYBPC2                          |
| Gga.4988.1.S1_at   | CALD1                           |
| Gga.4988.2.S1_a_at | CALD1                           |
| Gga.4995.1.A1_at   | LOC776570                       |
| Gga.4995.1.S1_s_at | LOC776570                       |
| Gga.4999.1.S1_a_at | ITGA4                           |
| Gga.4999.2.S1_at   | ITGA4                           |
| Gga.5002.1.S1_at   | MDK                             |
| Gga.5005.1.S1_at   | CHIA                            |
| Gga.5005.1.S1_s_at | CHIA                            |
| Gga.5007.1.S1_at   | CDKN2B                          |
| Gga.5008.1.S1_at   | CDKN2A                          |
| Gga.501.1.S1_at    | MMP27                           |
| Gga.5018.1.A1_s_at | ZFX                             |
| Gga.502.1.S1_at    | HMGA2                           |
| Gga.5028.1.S1_at   | LOC404298                       |
| Gga.5031.1.S1_s_at | NT5C3                           |
| Gga.506.1.S1_at    | ST8SIA1                         |
| Gga.5073.1.S1_at   | LOC428141                       |
| Gga.5085.1.S1_at   | OVM                             |
| Gga.5087.1.S1_x_at | LOC769327                       |
| Gga.5091.1.S1_at   | CAV1                            |
| Gga.5092.1.A1_at   | ANXA2                           |
| Gga.5095.1.S1_at   | CHRNA3                          |
| Gga.5101.1.S1_at   | ZBTB16                          |
| Gga.5109.1.S1_s_at | MYCN                            |
| Gga.511.1.S1_at    | TLX1                            |
| Gga.5111.1.S1_at   | CCDC80                          |
| Gga.512.1.S1_at    | IL8                             |
| Gga.5122.1.S1_at   | HOXA7                           |
| Gga.5126.1.S1_s_at | GRIA2                           |
| Gga.513.1.S1_s_at  | LOC776572 /// LOC776580 /// LOC |
| Gga.5130.1.S1_at   | F8                              |

|                    |               |
|--------------------|---------------|
| Gga.5132.1.S1_at   | F7            |
| Gga.5133.1.S1_at   | DAZL          |
| Gga.5136.1.S1_x_at | BLB2          |
| Gga.514.1.S1_at    | F10           |
| Gga.5144.1.A1_at   | SEPHS1        |
| Gga.5144.1.S1_at   | SEPHS1        |
| Gga.5146.1.S1_at   | DDB1          |
| Gga.5147.1.S1_x_at | BLB2          |
| Gga.5148.1.S1_at   | TNFRSF1B      |
| Gga.5148.1.S1_s_at | TNFRSF1B      |
| Gga.5148.1.S2_s_at | TNFRSF1B      |
| Gga.5154.1.S1_at   | POSTN         |
| Gga.5160.1.S1_at   | CACNB4        |
| Gga.5161.2.S1_s_at | ANK3          |
| Gga.5162.1.S1_at   | F5            |
| Gga.5163.1.S1_at   | NGFB          |
| Gga.5164.1.S1_at   | BCL2A1        |
| Gga.5164.1.S2_at   | BCL2A1        |
| Gga.5166.1.S1_at   | TSPAN32       |
| Gga.5167.1.S1_at   | CD81          |
| Gga.5168.2.S1_s_at | UBE2G2        |
| Gga.517.1.S1_x_at  | BLB1          |
| Gga.5170.1.S1_s_at | PODXL         |
| Gga.5171.1.S1_at   | CDH5          |
| Gga.5174.1.S1_at   | PHF20L1       |
| Gga.5175.1.S1_s_at | RCJMB04_30a17 |
| Gga.5178.1.S1_at   | PTPRF         |
| Gga.518.1.S1_x_at  | BLB1          |
| Gga.5180.1.S1_at   | TNFRSF8       |
| Gga.5187.1.S1_at   | SQSTM1        |
| Gga.5187.1.S1_s_at | SQSTM1        |
| Gga.5190.2.S1_at   | ELFN1         |
| Gga.5196.1.S1_at   | SAP30         |
| Gga.5200.3.S1_s_at | RCJMB04_25c5  |
| Gga.5205.1.S1_at   | BZRPL1        |
| Gga.5208.1.S1_a_at | UBQLN1        |
| Gga.5218.1.S1_at   | GKAP1         |
| Gga.5221.2.S1_at   | NUP98         |
| Gga.5226.2.S1_s_at | KIAA1609      |
| Gga.5229.1.S1_s_at | C18orf22      |

|                    |              |
|--------------------|--------------|
| Gga.5231.1.S1_at   | PPP4R2       |
| Gga.5231.2.A1_at   | PPP4R2       |
| Gga.5236.1.S1_at   | CWC15        |
| Gga.5237.2.S1_at   | IPO7         |
| Gga.5242.2.S1_a_at | HSD17B11     |
| Gga.5244.1.S1_at   | RCJMB04_5e8  |
| Gga.5244.2.S1_a_at | RCJMB04_5e8  |
| Gga.5245.1.S1_a_at | KIAA0317     |
| Gga.5245.2.A1_at   | KIAA0317     |
| Gga.5255.1.S1_at   | EFEMP1       |
| Gga.5256.1.S1_at   | REXO1        |
| Gga.5262.3.S1_s_at | ACAT2        |
| Gga.5270.1.S1_at   | LOC422270    |
| Gga.5278.2.S1_a_at | TARSL2       |
| Gga.5281.1.S1_at   | ACYP2        |
| Gga.5283.1.S1_at   | SCARB2       |
| Gga.5285.1.A1_at   | LANCL1       |
| Gga.5288.1.S1_at   | TEF          |
| Gga.5289.1.S1_at   | GPD1         |
| Gga.5291.1.S1_at   | CADM1        |
| Gga.5293.2.S1_a_at | LOC424892    |
| Gga.530.1.S1_at    | CACNA1D      |
| Gga.5300.1.S1_at   | PDE6D        |
| Gga.5305.1.S1_at   | SPRED1       |
| Gga.5313.2.S1_a_at | AMFR         |
| Gga.5313.2.S1_at   | AMFR         |
| Gga.5316.2.S1_s_at | LRFN5        |
| Gga.5323.1.S1_s_at | MEF2C        |
| Gga.5325.1.S1_at   | BCL7A        |
| Gga.5327.3.S1_a_at | LOC419508    |
| Gga.5341.1.S1_at   | SHANK2       |
| Gga.5345.2.S1_a_at | ALKBH2       |
| Gga.5347.1.S1_s_at | RCJMB04_25m4 |
| Gga.5350.1.S1_a_at | OSGEPL1      |
| Gga.5356.1.S1_at   | DPP7         |
| Gga.5359.1.S1_at   | LOC417676    |
| Gga.536.1.S1_a_at  | OASL         |
| Gga.5360.2.S1_a_at | TSC22D3      |
| Gga.5361.2.S1_at   | ADH5         |
| Gga.5369.1.S1_at   | SCNN1G       |

|                    |                          |
|--------------------|--------------------------|
| Gga.537.2.S1_a_at  | VEGFA                    |
| Gga.5373.1.S1_at   | TMEM45B                  |
| Gga.5378.1.S1_at   | HNRNPU                   |
| Gga.5383.2.S1_at   | PDCD2L /// RCJMB04_27n18 |
| Gga.5384.2.S1_at   | NEK4                     |
| Gga.5385.1.S1_s_at | RCJMB04_21j5             |
| Gga.5386.1.S1_at   | TNFRSF6B                 |
| Gga.539.1.S1_at    | CD247                    |
| Gga.5393.1.S1_at   | LOC423941                |
| Gga.5394.1.S1_a_at | STK40                    |
| Gga.5396.1.S1_at   | C1QB                     |
| Gga.5397.1.S1_at   | CYP2J2                   |
| Gga.5397.1.S1_s_at | CYP2J2                   |
| Gga.5398.1.S1_at   | AGAP1                    |
| Gga.540.1.S1_at    | MGP                      |
| Gga.5401.1.S1_at   | DHRS7                    |
| Gga.5407.1.S1_at   | TCEA2                    |
| Gga.5412.2.S1_at   | LONP1                    |
| Gga.5419.1.S1_at   | CLDN11                   |
| Gga.542.1.S1_at    | LOC395914                |
| Gga.5427.1.S1_at   | EFHA1                    |
| Gga.5435.1.S1_at   | RRAGB                    |
| Gga.5440.1.S1_s_at | BCL7A                    |
| Gga.5441.2.S1_a_at | HTATIP2                  |
| Gga.5444.2.A1_at   | BDH1                     |
| Gga.5444.2.S1_a_at | BDH1                     |
| Gga.5447.1.S1_at   | AP4B1                    |
| Gga.5451.2.S1_a_at | CDKAL1                   |
| Gga.5455.2.S1_s_at | CIAPIN1                  |
| Gga.5465.1.S1_at   | RCAN1                    |
| Gga.5484.1.S1_at   | DYNC2LI1                 |
| Gga.5487.1.S1_at   | POLE3                    |
| Gga.5489.1.S1_at   | MRPL42                   |
| Gga.5492.2.S1_s_at | SUGT1                    |
| Gga.5500.2.S1_a_at | MRAS                     |
| Gga.5501.1.S1_at   | DUS1L                    |
| Gga.5506.1.S1_a_at | LOC415950                |
| Gga.5517.1.S1_s_at | RCJMB04_33m12            |
| Gga.552.1.S1_at    | DIO3                     |
| Gga.5522.2.S1_a_at | SLC25A1                  |



|                    |              |
|--------------------|--------------|
| Gga.5527.1.S1_at   | TSPAN1       |
| Gga.5529.1.S1_at   | MAPK14       |
| Gga.553.1.S1_at    | DIO1         |
| Gga.5532.1.S1_at   | SMU1         |
| Gga.5533.1.S1_at   | LATS1        |
| Gga.5537.1.S1_at   | FUNDC1       |
| Gga.554.1.S1_at    | HGF          |
| Gga.5540.1.S1_at   | DAGLB        |
| Gga.5541.1.S1_at   | PECAM1       |
| Gga.5545.1.S1_at   | LEPROTL1     |
| Gga.5546.1.S1_at   | SCYL3        |
| Gga.5548.1.S1_at   | NPM3         |
| Gga.5551.1.S1_a_at | GPR153       |
| Gga.5553.2.S1_s_at | GPS1         |
| Gga.5554.1.S1_at   | CSRP3        |
| Gga.5555.1.S1_at   | RWDD4A       |
| Gga.5559.1.S1_at   | DYNLRB1      |
| Gga.556.1.S1_at    | PAX6         |
| Gga.5566.1.S1_at   | SLC25A4      |
| Gga.5570.1.S1_at   | GEMIN5       |
| Gga.5573.1.S1_at   | RCJMB04_3k21 |
| Gga.5574.1.S1_at   | HIC2         |
| Gga.5580.1.S1_at   | FBXL18       |
| Gga.5588.1.S1_at   | PDZK1IP1     |
| Gga.5594.1.S1_at   | TRPV2        |
| Gga.5601.1.S1_at   | SRP14        |
| Gga.5601.2.S1_s_at | SRP14        |
| Gga.561.1.S1_s_at  | LOC395944    |
| Gga.5612.1.S1_at   | AK3L2        |
| Gga.5613.1.S1_at   | BANP         |
| Gga.5616.2.S1_a_at | LOC770126    |
| Gga.5625.1.S1_s_at | RCJMB04_1e2  |
| Gga.5626.1.S1_s_at | EVL          |
| Gga.5627.1.S1_at   | LIPG         |
| Gga.5629.1.S1_at   | LOC415671    |
| Gga.563.1.S1_at    | SCN9A        |
| Gga.5631.2.S1_at   | IKIP         |
| Gga.5631.3.S1_at   | IKIP         |
| Gga.5635.1.S1_at   | ABCC5        |
| Gga.5636.1.S1_at   | CAPRIN1      |

|                    |              |
|--------------------|--------------|
| Gga.5637.1.S1_at   | IL4          |
| Gga.5644.1.S1_s_at | RCJMB04_15h2 |
| Gga.5644.2.S1_s_at | RCJMB04_15h2 |
| Gga.5648.2.S1_a_at | ISLR         |
| Gga.5671.1.S1_at   | KRAS         |
| Gga.568.1.S1_at    | LOC395957    |
| Gga.5680.1.S1_at   | GRID2        |
| Gga.5687.2.S1_a_at | KIF2C        |
| Gga.5687.3.S1_a_at | KIF2C        |
| Gga.5687.4.S1_a_at | KIF2C        |
| Gga.5692.1.S1_at   | NDUFB4       |
| Gga.5707.2.S1_a_at | C7orf26      |
| Gga.5713.3.S1_a_at | RTN4IP1      |
| Gga.572.1.S1_at    | NR5A2        |
| Gga.572.1.S2_at    | NR5A2        |
| Gga.574.1.S1_at    | CD8B         |
| Gga.5743.1.S1_at   | LY96         |
| Gga.5744.1.S1_at   | HDDC2        |
| Gga.5747.1.S1_a_at | SAV1         |
| Gga.5748.1.S1_at   | IL13RA2      |
| Gga.575.1.S1_at    | CD8A         |
| Gga.5751.1.S1_at   | ANKRD1       |
| Gga.5751.1.S2_at   | ANKRD1       |
| Gga.5753.1.S1_s_at | RCJMB04_33d2 |
| Gga.5755.2.S1_a_at | TSPAN4       |
| Gga.576.1.S1_at    | ICOSLG       |
| Gga.5764.1.S1_s_at | PUM1         |
| Gga.5776.1.S1_at   | CD34         |
| Gga.5777.1.S1_at   | CREB3        |
| Gga.5778.2.A1_at   | LOC769246    |
| Gga.5779.2.S1_a_at | CUTC         |
| Gga.5782.1.S1_at   | RCJMB04_19e2 |
| Gga.5784.1.S1_at   | TMEM121      |
| Gga.5793.1.S1_at   | LOC777261    |
| Gga.5799.1.S1_s_at | P4HA2        |
| Gga.5803.2.S1_s_at | RCJMB04_5b12 |
| Gga.5805.1.S1_s_at | RCJMB04_2h17 |
| Gga.5808.2.S1_a_at | SSNA1        |
| Gga.5810.1.S1_at   | MED10        |
| Gga.5814.1.S1_at   | SI           |

|                    |                                 |
|--------------------|---------------------------------|
| Gga.5816.1.S1_at   | RBPM5                           |
| Gga.5816.2.S1_a_at | RBPM5                           |
| Gga.5824.1.S1_at   | LOC770695                       |
| Gga.5826.1.S1_at   | MAPT                            |
| Gga.5827.1.S1_at   | DSCAM                           |
| Gga.583.1.A1_at    | SI                              |
| Gga.5830.1.S1_at   | RWDD2B                          |
| Gga.5838.1.A1_at   | LOC426624                       |
| Gga.5838.1.S1_s_at | CHIR-B3 /// LOC770720 /// LOC7' |
| Gga.584.1.S1_at    | VDR                             |
| Gga.5846.1.S1_at   | LOC771291                       |
| Gga.5847.1.S1_at   | PROSAPIP1                       |
| Gga.5848.3.S1_a_at | CLDN10                          |
| Gga.5850.1.S1_at   | MED21                           |
| Gga.5851.1.S1_at   | UGT1A1                          |
| Gga.5853.1.S1_at   | PEPD                            |
| Gga.5854.1.S1_at   | ENPP7                           |
| Gga.5860.1.S1_at   | GPA33                           |
| Gga.5865.1.S1_at   | TBCA                            |
| Gga.5869.1.S1_s_at | OLFML2B                         |
| Gga.5876.3.S1_at   | DAZAP1                          |
| Gga.5877.1.S1_at   | MRPL1                           |
| Gga.5878.1.S1_at   | MICALL2                         |
| Gga.588.1.S1_at    | GFRA1                           |
| Gga.5888.2.S1_a_at | MLL3                            |
| Gga.5890.2.S1_at   | WDR77                           |
| Gga.5891.1.S1_at   | PDCD6                           |
| Gga.5897.1.S1_at   | AGPS                            |
| Gga.5899.1.S1_at   | FAM125B                         |
| Gga.59.1.S1_at     | LOC395260                       |
| Gga.5900.1.S1_a_at | DNAJA4                          |
| Gga.5900.3.S1_a_at | DNAJA4                          |
| Gga.5901.1.S1_s_at | BRP44L                          |
| Gga.5901.2.S1_s_at | BRP44L                          |
| Gga.5905.1.S1_at   | C1orf123                        |
| Gga.5906.1.S1_at   | SYNGR3                          |
| Gga.591.1.S1_s_at  | CYP11A1                         |
| Gga.5917.1.S1_at   | LOC769799                       |
| Gga.5919.1.S1_at   | CYCS                            |
| Gga.5919.2.S1_a_at | CYCS                            |

|                    |                 |
|--------------------|-----------------|
| Gga.5928.1.S1_at   | LOXL1           |
| Gga.5929.1.S1_at   | LOC769360       |
| Gga.593.1.S1_at    | CHAT1           |
| Gga.593.1.S1_s_at  | CHAT1 /// CHAT2 |
| Gga.5932.1.S1_s_at | CLCN7           |
| Gga.5935.1.S1_s_at | SNTB1           |
| Gga.5946.3.S1_a_at | CPA2            |
| Gga.595.1.S1_at    | NELL2           |
| Gga.5953.1.S1_s_at | SLC43A3         |
| Gga.5955.1.S1_at   | LOC425935       |
| Gga.5957.1.S1_a_at | CREB3L2         |
| Gga.5957.2.A1_at   | CREB3L2         |
| Gga.5958.1.S1_at   | NLK             |
| Gga.596.1.S2_at    | HSD3B1          |
| Gga.5964.1.S1_at   | UROS            |
| Gga.5969.2.S1_a_at | PAQR7           |
| Gga.5972.1.S1_at   | MBD2            |
| Gga.5982.1.S1_s_at | RCJMB04_13d22   |
| Gga.5984.2.S1_a_at | LOC424383       |
| Gga.5986.1.S1_at   | LOC419782       |
| Gga.5993.1.S1_at   | OAF             |
| Gga.5999.2.S1_at   | PSME3           |
| Gga.6003.1.S1_a_at | ME3             |
| Gga.6007.1.S1_at   | RNF128          |
| Gga.6008.1.S1_at   | CDC45L          |
| Gga.6011.1.S1_s_at | UHRF2           |
| Gga.6012.2.S1_a_at | LOC418426       |
| Gga.6024.3.S1_s_at | PNRC1           |
| Gga.6025.1.S1_s_at | CTSS            |
| Gga.6027.1.S1_at   | SUCLG1          |
| Gga.6027.1.S1_s_at | SUCLG1          |
| Gga.6030.1.S1_s_at | RCJMB04_31h10   |
| Gga.6031.1.S1_at   | RCJMB04_10h2    |
| Gga.6034.1.S1_at   | NEK6            |
| Gga.6042.1.S1_at   | C20orf54        |
| Gga.6042.2.S1_s_at | GARNL3          |
| Gga.6044.3.S1_a_at | MRPS18C         |
| Gga.6048.1.S1_a_at | CLK4            |
| Gga.6049.1.S1_at   | ATP5J           |
| Gga.6052.2.S1_a_at | SCD5            |

|                    |                                |
|--------------------|--------------------------------|
| Gga.6054.1.S1_at   | PKD2                           |
| Gga.6054.2.S1_s_at | PKD2                           |
| Gga.6057.1.S1_at   | HNRNPA0                        |
| Gga.606.1.S1_at    | KIT                            |
| Gga.6065.3.S1_at   | SEC11A                         |
| Gga.6066.1.S1_at   | TCF7                           |
| Gga.6068.3.S1_at   | DNALI1                         |
| Gga.607.1.S1_at    | BMPR1B                         |
| Gga.6070.1.S1_at   | PSCA                           |
| Gga.6072.2.S1_at   | SRGN                           |
| Gga.6076.1.S1_at   | LOC771972                      |
| Gga.6077.1.S1_at   | TMIGD1                         |
| Gga.6086.2.S1_a_at | LOC419498                      |
| Gga.6089.1.S1_at   | SLC27A2                        |
| Gga.609.1.S1_at    | CTR BETA 2                     |
| Gga.6090.2.S1_a_at | NT5DC2                         |
| Gga.6091.1.S1_s_at | ATP5I                          |
| Gga.6093.1.S1_at   | C9orf91                        |
| Gga.6098.1.S1_at   | LOC428309                      |
| Gga.6099.1.S1_at   | LOC771753                      |
| Gga.6103.1.S1_at   | H3F3A /// LOC769809 /// LOC770 |
| Gga.6103.1.S1_x_at | H3F3A /// LOC769809 /// LOC770 |
| Gga.6104.1.S1_at   | C6orf86                        |
| Gga.6104.1.S1_s_at | C6orf86                        |
| Gga.6106.1.S1_a_at | RARRES2                        |
| Gga.6122.1.S1_a_at | TSPO                           |
| Gga.613.1.A1_at    | UBXD2                          |
| Gga.6131.1.S1_at   | DNAJC8                         |
| Gga.6146.2.S1_a_at | LGALS2                         |
| Gga.6147.1.S1_at   | ABLIM3                         |
| Gga.6159.1.S1_s_at | ACADL                          |
| Gga.6162.1.S1_s_at | LOC423224 /// SPTBN5           |
| Gga.6165.1.S1_at   | KIF9                           |
| Gga.6169.1.S1_at   | LYRM2                          |
| Gga.617.1.S1_at    | CYP1A1                         |
| Gga.6171.1.S1_a_at | COX7C                          |
| Gga.6175.2.S1_a_at | C12orf31                       |
| Gga.6177.1.S1_at   | SIL1                           |
| Gga.618.1.S1_at    | CYP1A4                         |
| Gga.6181.1.S1_at   | HSD11B1                        |

|                    |               |
|--------------------|---------------|
| Gga.6182.1.S1_at   | LOC771784     |
| Gga.6183.1.S1_at   | REG4          |
| Gga.6185.1.S1_a_at | LOC770190     |
| Gga.6201.1.S1_at   | ISG12-2       |
| Gga.6203.1.S1_at   | BTBD11        |
| Gga.6203.2.S1_a_at | BTBD11        |
| Gga.621.1.S1_at    | HOXA2         |
| Gga.6214.1.S1_a_at | PLA2G1B       |
| Gga.622.1.S1_at    | BFSP1         |
| Gga.623.1.S1_at    | LOC396058     |
| Gga.6236.1.S1_at   | RCJMB04_1e1   |
| Gga.6240.1.S1_at   | RCJMB04_18p19 |
| Gga.6250.1.S1_at   | SELENBP1      |
| Gga.6252.1.S1_at   | TMEM16A       |
| Gga.6256.2.S1_a_at | GNMT          |
| Gga.6260.1.S1_at   | LOC770490     |
| Gga.6263.2.S1_s_at | LOC424014     |
| Gga.6265.1.S1_at   | GSTT1         |
| Gga.6267.1.S1_at   | STOM          |
| Gga.6269.2.S1_s_at | FARSB         |
| Gga.6276.2.S1_a_at | PES1          |
| Gga.6276.3.S1_at   | PES1          |
| Gga.6279.3.S1_a_at | C16orf57      |
| Gga.6289.2.S1_at   | CAB39L        |
| Gga.6289.2.S1_s_at | CAB39L        |
| Gga.6292.1.S1_a_at | TM4SF4        |
| Gga.6294.1.S1_at   | SH3PX3        |
| Gga.6299.2.S1_s_at | PRPSAP2       |
| Gga.6311.1.S1_at   | HEY1          |
| Gga.6314.1.S1_at   | LOC422151     |
| Gga.6318.1.S1_at   | ADRBK2        |
| Gga.632.1.S1_at    | AGTR1         |
| Gga.6324.1.S1_at   | RBP2          |
| Gga.6328.2.S1_at   | TIMM17A       |
| Gga.6329.1.S1_at   | LOC420860     |
| Gga.633.1.S1_at    | EPHB6         |
| Gga.6330.2.S1_s_at | RNF7          |
| Gga.6338.1.S1_s_at | BRD7          |
| Gga.6340.2.S1_a_at | TNNI1         |
| Gga.6342.1.S1_s_at | DFNA5         |

|                    |                                       |
|--------------------|---------------------------------------|
| Gga.6343.4.S1_a_at | CDKN3                                 |
| Gga.6344.3.S1_a_at | IWS1                                  |
| Gga.6347.2.A1_at   | C7orf30                               |
| Gga.635.1.S1_at    | GLRX                                  |
| Gga.6356.2.S1_s_at | LOC422214                             |
| Gga.636.1.S1_at    | IBSP                                  |
| Gga.6363.1.S1_at   | DEPDC7                                |
| Gga.6368.1.S1_at   | DUSP14                                |
| Gga.6369.1.S1_at   | ENTPD8                                |
| Gga.6371.2.S1_a_at | BTG2                                  |
| Gga.6375.1.S1_at   | BHLHB8                                |
| Gga.6383.1.S1_at   | PPP2R1B                               |
| Gga.639.1.S1_at    | S100A11                               |
| Gga.6390.3.S1_a_at | CTSC                                  |
| Gga.6394.1.S1_a_at | RAPSN                                 |
| Gga.6399.1.S1_at   | MALL                                  |
| Gga.64.1.S1_at     | LOC776572 /// LOC776580 /// LOC776581 |
| Gga.6402.1.S1_at   | C1orf190                              |
| Gga.6408.1.S1_at   | DGKE                                  |
| Gga.6446.1.S1_x_at | RPL38                                 |
| Gga.645.1.S1_s_at  | SKIL                                  |
| Gga.6457.2.S1_at   | MTERFD1                               |
| Gga.6460.1.S1_at   | LOC770251                             |
| Gga.6470.1.S1_at   | TMEM104                               |
| Gga.6474.1.S1_at   | CXorf39                               |
| Gga.648.1.S2_at    | FGF1                                  |
| Gga.6487.1.S1_at   | CAPN8                                 |
| Gga.6492.1.S1_at   | LOC422510                             |
| Gga.6496.1.S1_at   | GAL11                                 |
| Gga.6504.1.S1_at   | LOC422993                             |
| Gga.6514.1.S1_a_at | LYPLA2P1                              |
| Gga.6516.1.S1_at   | FABP2                                 |
| Gga.6523.1.S1_at   | TMEM173                               |
| Gga.6529.1.S1_at   | FCER1G                                |
| Gga.653.1.S1_at    | TNXB                                  |
| Gga.6535.1.S1_at   | KBTBD8                                |
| Gga.6548.1.S1_at   | GPR87                                 |
| Gga.6559.1.A1_at   | SEMA3G                                |
| Gga.657.1.S1_at    | FOXG1                                 |
| Gga.658.1.S1_at    | RYR3                                  |

|                    |                                 |
|--------------------|---------------------------------|
| Gga.659.1.S1_at    | RYR1                            |
| Gga.6597.1.S1_at   | SDC1                            |
| Gga.660.1.S1_at    | P2RY6                           |
| Gga.6612.2.A1_at   | LOC693257                       |
| Gga.6614.1.S1_at   | C1orf66                         |
| Gga.663.1.S1_at    | P2RY5                           |
| Gga.6642.1.A1_at   | LOC769242                       |
| Gga.6650.3.S1_a_at | PDCD1LG2                        |
| Gga.6653.1.S1_at   | HNF4beta                        |
| Gga.666.1.S1_a_at  | VIP                             |
| Gga.67.1.S1_at     | MIP                             |
| Gga.670.1.S1_at    | MST1                            |
| Gga.6700.1.S1_s_at | ABCG1                           |
| Gga.6712.1.S1_at   | LOC425525 /// LOC427060 /// LOC |
| Gga.6713.1.S1_at   | GZMA                            |
| Gga.6714.1.S1_at   | RAD9A                           |
| Gga.6718.1.S1_s_at | VPS16                           |
| Gga.6726.1.S1_at   | RAB40C                          |
| Gga.6729.2.S1_at   | DHX57 /// LOC429336             |
| Gga.674.1.S1_at    | GCH1                            |
| Gga.6762.1.A1_at   | DDOST                           |
| Gga.6763.1.S1_s_at | KIAA1244                        |
| Gga.6765.1.S1_at   | RGS12                           |
| Gga.677.1.S1_at    | GNOT1                           |
| Gga.6773.1.S1_at   | SLC10A4                         |
| Gga.6778.1.S1_x_at | LOC426912                       |
| Gga.6778.2.S1_a_at | LOC431317                       |
| Gga.6778.2.S1_at   | LOC426912                       |
| Gga.679.1.S1_at    | VLDLR                           |
| Gga.6791.1.A1_at   | NFIB                            |
| Gga.6791.1.A1_s_at | NFIB                            |
| Gga.6792.1.A1_x_at | KLHL8                           |
| Gga.6795.1.A1_at   | KIFC1                           |
| Gga.6804.1.A1_s_at | RCJMB04_21h11                   |
| Gga.681.2.S1_a_at  | NTRK2                           |
| Gga.682.1.S1_a_at  | ST6GALNAC2                      |
| Gga.6823.1.A1_at   | PSMC3                           |
| Gga.6825.1.S1_at   | LOC419812                       |
| Gga.6838.1.S1_at   | C2orf43                         |
| Gga.6842.2.S1_s_at | CNOT4                           |



|                    |                                 |
|--------------------|---------------------------------|
| Gga.6847.1.S1_at   | LOC425364 /// LOC425625 /// LOC |
| Gga.6848.2.S1_at   | RCJMB04_20n13                   |
| Gga.685.1.S1_at    | RAF1                            |
| Gga.6851.1.S1_at   | SLC26A9                         |
| Gga.6853.1.A1_at   | LOC425311                       |
| Gga.6868.1.S1_at   | LOC417458                       |
| Gga.6870.1.S1_at   | FBXO39                          |
| Gga.6870.1.S1_s_at | LOC776097                       |
| Gga.6877.1.S1_at   | ROBO2                           |
| Gga.6878.1.S1_s_at | ADCY7                           |
| Gga.6910.1.A1_at   | RCJMB04_38d18                   |
| Gga.6917.1.A1_at   | RNASEH1                         |
| Gga.6919.1.A1_at   | CXXC5                           |
| Gga.692.1.S2_at    | LOC396173                       |
| Gga.6922.1.S1_at   | MYSM1                           |
| Gga.693.1.S1_at    | CSRP1                           |
| Gga.6939.1.A1_at   | DNAH9                           |
| Gga.694.1.S1_at    | EPHB1                           |
| Gga.6941.1.S1_at   | LOC771156                       |
| Gga.6959.1.S1_at   | IL4R                            |
| Gga.6972.1.S1_at   | ABI3                            |
| Gga.698.1.S2_at    | VCL                             |
| Gga.6982.1.S1_at   | LOC415553                       |
| Gga.6982.2.S1_a_at | LOC415553                       |
| Gga.6983.1.S1_at   | MGRN1                           |
| Gga.6984.1.S1_at   | HN1                             |
| Gga.6984.2.S1_s_at | HN1                             |
| Gga.6987.2.S1_at   | PDCD5                           |
| Gga.699.1.S1_at    | THRB                            |
| Gga.6993.1.S1_at   | LOC415683                       |
| Gga.70.1.S1_at     | NKX3-2                          |
| Gga.700.1.S1_at    | TNNI2                           |
| Gga.7002.1.S1_at   | FBXW8                           |
| Gga.7004.1.S1_at   | LOC420301                       |
| Gga.7009.2.S1_a_at | GNB4                            |
| Gga.701.1.S1_at    | RSFR                            |
| Gga.701.1.S1_s_at  | LOC396194 /// RSFR              |
| Gga.7011.1.S1_a_at | LOC419195                       |
| Gga.7013.1.S1_at   | CHPF                            |
| Gga.7017.1.S1_at   | GDA /// LOC770483               |

|                    |           |
|--------------------|-----------|
| Gga.7018.1.S1_s_at | FGD3      |
| Gga.702.1.S1_at    | ROS1      |
| Gga.7024.1.S1_s_at | SIRT2     |
| Gga.703.1.S1_at    | LOC396194 |
| Gga.7035.1.S1_x_at | LOC769722 |
| Gga.7035.4.S1_a_at | LOC769722 |
| Gga.7035.4.S1_x_at | LOC769722 |
| Gga.7037.1.S1_s_at | SUPT5H    |
| Gga.7037.2.S1_s_at | SUPT5H    |
| Gga.7040.1.S1_at   | CTSH      |
| Gga.7041.3.S1_a_at | LOC422046 |
| Gga.7044.1.S1_s_at | SEPP1     |
| Gga.7044.3.S1_s_at | SEPP1     |
| Gga.7046.1.S1_s_at | DMBT1     |
| Gga.7048.1.S1_at   | MIZF      |
| Gga.705.1.S1_at    | PGR       |
| Gga.7055.2.S1_a_at | LOC776812 |
| Gga.706.1.S1_at    | TP53      |
| Gga.7061.1.S1_s_at | SH3GLB1   |
| Gga.7064.1.S1_at   | IGSF1     |
| Gga.7066.1.S1_at   | SIPA1L1   |
| Gga.707.1.S1_at    | LOC396207 |
| Gga.7074.1.S1_at   | PPIH      |
| Gga.7079.1.S1_at   | FOXK2     |
| Gga.708.1.S1_x_at  | NFIC      |
| Gga.708.3.S1_a_at  | NFIC      |
| Gga.7084.1.S1_at   | SOS2      |
| Gga.7086.1.S1_at   | LOC420010 |
| Gga.7087.1.S1_at   | CKAP5     |
| Gga.7089.1.S1_at   | TMEM22    |
| Gga.709.2.S1_a_at  | NFIB      |
| Gga.7097.1.S1_at   | FAM120A   |
| Gga.71.1.S1_at     | PDGFB     |
| Gga.710.1.S1_a_at  | NFIA      |
| Gga.710.6.S1_a_at  | NFIA      |
| Gga.7100.1.S1_at   | LOC422509 |
| Gga.7102.1.S1_at   | UBOX5     |
| Gga.7104.1.S1_s_at | CRIP1     |
| Gga.7109.1.S1_s_at | INPP5K    |
| Gga.711.1.S1_at    | TNR       |

|                    |              |
|--------------------|--------------|
| Gga.7115.1.S1_a_at | AGTRAP       |
| Gga.7117.1.S1_at   | LGTN         |
| Gga.7118.2.S1_s_at | METT9        |
| Gga.713.1.S1_at    | LYZ          |
| Gga.7130.1.S1_at   | OSBPL10      |
| Gga.7139.2.S1_s_at | C14orf32     |
| Gga.714.1.S2_at    | FMN1         |
| Gga.7140.2.S1_s_at | RCJMB04_3a16 |
| Gga.7144.1.S1_at   | C19orf28     |
| Gga.7147.1.S1_at   | IFT172       |
| Gga.7148.2.A1_at   | PLCG2        |
| Gga.7149.2.S1_a_at | LPXN         |
| Gga.715.1.S1_at    | LMNA         |
| Gga.7164.1.S1_at   | LOC421110    |
| Gga.7176.1.S1_at   | MECR         |
| Gga.718.1.S1_at    | DMD          |
| Gga.718.2.S1_a_at  | DMD          |
| Gga.718.3.S1_x_at  | DMD          |
| Gga.7180.1.S1_s_at | BUB1         |
| Gga.7186.1.S1_at   | BPNT1        |
| Gga.7186.2.S1_a_at | BPNT1        |
| Gga.7194.1.S1_at   | SPATA13      |
| Gga.7197.1.S1_at   | LOC771974    |
| Gga.7199.1.S1_s_at | COMT         |
| Gga.72.1.S1_at     | CAPN3        |
| Gga.7201.2.S1_a_at | PXMP4        |
| Gga.7203.1.S1_at   | STK10        |
| Gga.7204.1.S1_at   | LOC769044    |
| Gga.721.1.S1_at    | MYB          |
| Gga.7210.1.S1_at   | ZP3          |
| Gga.7211.1.S1_at   | TMBIM1       |
| Gga.7212.1.S1_at   | LOC421447    |
| Gga.7213.1.S1_at   | LOC423256    |
| Gga.722.1.S1_x_at  | LOC396247    |
| Gga.7223.1.A1_at   | AP1G1        |
| Gga.7224.2.S1_s_at | NRBP1        |
| Gga.7225.1.S1_at   | LOC418040    |
| Gga.7228.1.S1_at   | CMBL         |
| Gga.723.1.S1_a_at  | CD28         |
| Gga.7230.1.S1_at   | LOC770869    |

|                    |              |
|--------------------|--------------|
| Gga.7231.1.S1_at   | SOX17        |
| Gga.7235.1.S1_at   | DHRS3        |
| Gga.7237.1.S1_at   | LOC425086    |
| Gga.724.1.S1_at    | HOXD4        |
| Gga.7240.1.S1_s_at | PLTP         |
| Gga.7242.1.S1_at   | LOC428693    |
| Gga.7244.1.S1_at   | LOC426184    |
| Gga.7247.1.S1_at   | CREB3L3      |
| Gga.7252.1.S1_at   | MRPS12       |
| Gga.7254.2.S1_a_at | LOC769737    |
| Gga.7256.1.S1_at   | SEC14L2      |
| Gga.7259.1.A1_at   | LOC769608    |
| Gga.726.2.S1_a_at  | CDC2         |
| Gga.7260.1.S1_at   | SCARF1       |
| Gga.7262.1.S1_at   | MRRF         |
| Gga.7262.3.S1_at   | MRRF         |
| Gga.7266.1.S1_at   | C7orf55      |
| Gga.7267.2.S1_at   | WDR13        |
| Gga.7268.2.S1_s_at | RCJMB04_7e11 |
| Gga.7271.1.S1_s_at | MPP1         |
| Gga.7275.1.S1_at   | MOSPD1       |
| Gga.7276.1.S1_at   | PIGC         |
| Gga.7278.1.S1_at   | SLC25A29     |
| Gga.7281.1.S1_at   | FBXL21       |
| Gga.7281.2.S1_a_at | FBXL21       |
| Gga.7282.1.S1_at   | C20orf116    |
| Gga.7285.1.S1_at   | LOC770952    |
| Gga.729.1.S1_at    | LOC396260    |
| Gga.7296.3.S1_s_at | IFNGR2       |
| Gga.7298.1.S1_at   | C1QA         |
| Gga.7309.1.S1_at   | LOC431003    |
| Gga.7310.2.A1_at   | PRKAB1       |
| Gga.7317.1.S1_at   | GFAP         |
| Gga.7319.2.S1_a_at | LOC426622    |
| Gga.7319.2.S1_s_at | LOC426622    |
| Gga.7320.1.S1_at   | TXNRD3       |
| Gga.7320.1.S1_s_at | TXNRD3       |
| Gga.7324.1.S1_at   | ARFGAP3      |
| Gga.7331.1.S1_at   | RAI2         |
| Gga.7337.1.S1_at   | SSBP2        |

|                    |               |
|--------------------|---------------|
| Gga.7337.2.S1_a_at | SSBP2         |
| Gga.735.1.S1_at    | SRL           |
| Gga.7351.1.S1_at   | C6orf161      |
| Gga.7354.1.S1_at   | IKZF2         |
| Gga.7355.1.S1_at   | MIS12         |
| Gga.7356.1.S1_at   | PANK3         |
| Gga.7360.1.S1_a_at | LOC769609     |
| Gga.7367.1.S1_at   | NHEJ1         |
| Gga.7373.2.S1_at   | NDUFB3        |
| Gga.7374.2.S1_a_at | RBM41         |
| Gga.7376.1.S1_at   | RCJMB04_16d24 |
| Gga.738.1.S1_at    | GSC           |
| Gga.7381.3.S1_s_at | WDR45L        |
| Gga.7382.1.S1_at   | NOM1          |
| Gga.7388.2.S1_s_at | TOR1A         |
| Gga.739.1.S1_at    | P20K          |
| Gga.7391.1.S1_at   | C11orf77      |
| Gga.7396.1.S1_at   | C9orf167      |
| Gga.74.1.S1_at     | LMO2          |
| Gga.740.1.S1_at    | S100A9        |
| Gga.7412.1.S1_s_at | RCJMB04_2h7   |
| Gga.7415.1.S1_at   | TPP1          |
| Gga.742.1.S1_at    | SST           |
| Gga.7424.1.S1_at   | SYNJ2         |
| Gga.7425.1.S1_at   | ANXA8L1       |
| Gga.7428.1.S1_at   | CMYA5         |
| Gga.7430.1.S1_at   | SYT11         |
| Gga.7435.3.S1_a_at | OSBPL1A       |
| Gga.7438.1.S1_at   | TSHZ2         |
| Gga.7442.1.S1_at   | PTGER3        |
| Gga.7447.1.S1_at   | LOC772080     |
| Gga.7447.2.S1_at   | LOC772080     |
| Gga.7447.2.S1_s_at | LOC772080     |
| Gga.7448.1.S1_at   | MED24         |
| Gga.7449.1.S1_at   | LOC416335     |
| Gga.7460.1.S1_a_at | C9orf151      |
| Gga.7460.1.S1_at   | C9orf151      |
| Gga.7466.1.S1_at   | FAM123A       |
| Gga.7467.1.S1_at   | PDLIM4        |
| Gga.7468.1.S1_at   | PERP          |

|                    |              |
|--------------------|--------------|
| Gga.7471.1.S1_at   | HSPG2        |
| Gga.7471.2.A1_s_at | HSPG2        |
| Gga.7476.1.S1_at   | TMEM108      |
| Gga.7477.1.S1_s_at | MSH6         |
| Gga.7482.1.S1_s_at | SETD4        |
| Gga.749.1.S1_at    | PLS1         |
| Gga.7492.2.S1_a_at | RASL11B      |
| Gga.7494.1.S1_at   | RCJMB04_4p22 |
| Gga.750.1.S1_at    | MYOD1        |
| Gga.7508.2.S1_at   | LOC428674    |
| Gga.751.1.S1_at    | LOC396296    |
| Gga.7514.1.S1_at   | CAD          |
| Gga.7514.2.S1_at   | CAD          |
| Gga.7518.1.S1_s_at | RCJMB04_1g4  |
| Gga.752.1.S1_at    | TAL1         |
| Gga.7528.1.S1_at   | KLF2         |
| Gga.7529.1.S1_at   | NPAT         |
| Gga.7535.1.S1_at   | NSD1         |
| Gga.7545.1.S1_at   | MORN2        |
| Gga.7551.1.S1_at   | WISP1        |
| Gga.7557.1.S1_at   | LOC768734    |
| Gga.756.1.S1_s_at  | ANK2         |
| Gga.7562.1.S1_a_at | LOC770202    |
| Gga.7566.1.S1_at   | LOC424918    |
| Gga.7571.1.S1_at   | SNRPA1       |
| Gga.7584.1.S1_s_at | KLHL18       |
| Gga.7588.1.S1_at   | GGTL3        |
| Gga.759.1.S1_at    | IGFBP2       |
| Gga.7598.1.S1_at   | LOC425545    |
| Gga.7599.1.S1_at   | LOC420810    |
| Gga.7604.1.S1_at   | PLSCR1       |
| Gga.7604.2.S1_a_at | PLSCR1       |
| Gga.7618.1.S1_at   | PSCD3        |
| Gga.7619.1.S1_at   | COG7         |
| Gga.7620.2.S1_a_at | C11orf54     |
| Gga.7623.1.S1_at   | C6orf129     |
| Gga.7633.1.S1_s_at | MYO9A        |
| Gga.7639.2.S1_a_at | C8orf80      |
| Gga.764.1.S1_at    | ACVR2B       |
| Gga.7644.1.S1_at   | LOC772187    |

|                    |               |
|--------------------|---------------|
| Gga.7650.1.S1_at   | GSK3B         |
| Gga.7653.2.S1_a_at | PRR6          |
| Gga.7656.2.S1_s_at | RCJMB04_17e23 |
| Gga.766.1.S1_at    | SEMA4D        |
| Gga.7672.2.S1_a_at | RCJMB04_2j4   |
| Gga.7673.1.S1_at   | C9orf18       |
| Gga.7674.2.S1_at   | MYCBP         |
| Gga.7677.1.S1_at   | LOC768603     |
| Gga.7679.1.S1_at   | GPSM2         |
| Gga.7685.3.S1_a_at | ANAPC2        |
| Gga.7686.1.S1_at   | C20orf72      |
| Gga.7689.2.S1_at   | CASK          |
| Gga.7689.2.S1_x_at | CASK          |
| Gga.7692.2.S1_a_at | TAGLN3        |
| Gga.7697.3.S1_a_at | LOC423257     |
| Gga.7708.1.S1_at   | RCJMB04_1d13  |
| Gga.7715.2.S1_at   | LOC415966     |
| Gga.7721.1.S1_at   | VILL          |
| Gga.7725.1.S1_at   | LOC426422     |
| Gga.7730.2.S1_at   | ARSI          |
| Gga.7733.1.S1_at   | ENTPD7        |
| Gga.774.1.S1_at    | DNTT          |
| Gga.7741.1.S1_at   | PTCD1         |
| Gga.7743.1.S1_at   | MRPL33        |
| Gga.7748.1.S1_at   | OSBPL10       |
| Gga.775.1.S1_at    | P22           |
| Gga.7750.1.S1_at   | LOC422459     |
| Gga.7752.1.S1_at   | LOC770248     |
| Gga.7757.1.S1_at   | UNC50         |
| Gga.7759.1.S1_a_at | CCT2          |
| Gga.7774.1.S1_at   | LOC427414     |
| Gga.7775.1.S1_at   | LOC417013     |
| Gga.7778.1.S1_at   | TM2D2         |
| Gga.778.1.S1_at    | LOC396357     |
| Gga.7784.1.S1_s_at | C4orf8        |
| Gga.7785.1.S1_at   | ADAMTS13      |
| Gga.7790.1.S1_at   | NR0B2         |
| Gga.7792.1.S1_s_at | RCJMB04_9i11  |
| Gga.7799.3.S1_at   | ING4          |
| Gga.780.1.S1_at    | IAPP          |

|                    |              |
|--------------------|--------------|
| Gga.7800.1.S1_at   | LOC428660    |
| Gga.7802.1.S1_at   | CCDC28A      |
| Gga.7802.2.S1_at   | CCDC28A      |
| Gga.7803.1.S1_at   | C6orf89      |
| Gga.7807.1.S1_at   | MFGE8        |
| Gga.7809.1.S1_at   | LOC771069    |
| Gga.7811.1.S1_at   | NME6         |
| Gga.7812.1.S1_at   | ORC6L        |
| Gga.7812.2.S1_a_at | ORC6L        |
| Gga.7815.2.S1_a_at | LOC418170    |
| Gga.7818.1.S1_at   | NELF         |
| Gga.7823.1.S1_at   | RCJMB04_19g9 |
| Gga.7828.2.S1_a_at | LOC425901    |
| Gga.7829.2.S1_a_at | C15orf48     |
| Gga.7833.3.S1_at   | CCDC12       |
| Gga.7835.1.S1_at   | KLHL8        |
| Gga.7838.1.S1_at   | CSF2RA       |
| Gga.784.1.S1_s_at  | PTPRS        |
| Gga.7840.1.S1_at   | MASP1        |
| Gga.7842.1.S1_at   | ARRDC2       |
| Gga.7843.1.S1_at   | SYPL1        |
| Gga.7849.1.S1_at   | LOC769446    |
| Gga.7851.1.S1_at   | GLO1         |
| Gga.7855.1.S1_at   | BMPER        |
| Gga.7860.1.S1_at   | XPO6         |
| Gga.7865.1.S1_at   | IRAK2        |
| Gga.787.2.S1_a_at  | CFL2         |
| Gga.7877.1.S1_at   | PIGL         |
| Gga.7879.1.S1_a_at | PEX10        |
| Gga.7879.2.S1_at   | PEX10        |
| Gga.788.1.S1_at    | LOC396380    |
| Gga.7880.1.S1_at   | BCL9         |
| Gga.7881.1.S1_at   | POLR2E       |
| Gga.7885.2.S1_at   | MSH4         |
| Gga.7886.1.S1_at   | C1QTNF2      |
| Gga.7890.1.S1_at   | SFRP4        |
| Gga.7892.1.S1_at   | LOC769992    |
| Gga.7897.1.S1_s_at | LRSAM1       |
| Gga.790.1.S1_at    | ISLET-2      |
| Gga.7900.2.S1_a_at | FIBIN        |



|                    |           |
|--------------------|-----------|
| Gga.7901.1.S1_at   | BOC       |
| Gga.7907.1.S1_at   | LRRC16A   |
| Gga.7908.1.S1_at   | C16orf61  |
| Gga.7908.1.S1_s_at | C16orf61  |
| Gga.791.1.S1_at    | IRF1      |
| Gga.7917.2.S1_a_at | GRAMD2    |
| Gga.7918.1.S1_at   | LOC423448 |
| Gga.7918.1.S1_s_at | LOC423448 |
| Gga.7920.1.S1_at   | C11orf52  |
| Gga.7921.1.S1_at   | CKAP5     |
| Gga.7921.1.S1_s_at | CKAP5     |
| Gga.7924.1.S1_s_at | FAM108C1  |
| Gga.7925.1.S1_s_at | RNF34     |
| Gga.793.1.S1_s_at  | ACHE      |
| Gga.7932.1.S1_s_at | ATG12     |
| Gga.7936.1.S1_at   | WWC3      |
| Gga.7937.1.S1_at   | CDS2      |
| Gga.7942.1.S1_at   | SAMD4A    |
| Gga.795.1.S1_at    | GATA4     |
| Gga.7953.1.S1_at   | RPL27A    |
| Gga.7955.1.S1_at   | SLC14A2   |
| Gga.7960.1.S1_at   | WNT5B     |
| Gga.7961.2.S1_a_at | C1orf128  |
| Gga.7966.1.S1_s_at | RNF4      |
| Gga.7970.1.S1_at   | LOC769783 |
| Gga.7997.1.S1_at   | C20orf177 |
| Gga.7997.2.S1_at   | C20orf177 |
| Gga.8001.2.S1_a_at | ATPAF1    |
| Gga.8001.3.S1_a_at | ATPAF1    |
| Gga.8001.3.S1_at   | ATPAF1    |
| Gga.8002.1.S1_a_at | C2orf33   |
| Gga.8003.1.S1_at   | C20orf30  |
| Gga.8004.1.S1_s_at | PEMT      |
| Gga.8004.3.S1_at   | PEMT      |
| Gga.801.1.S1_at    | IFNA      |
| Gga.8020.2.S1_a_at | C5orf32   |
| Gga.8021.3.S1_at   | IMMP1L    |
| Gga.8030.1.S1_at   | TFPI2     |
| Gga.8036.1.S1_s_at | C6orf154  |
| Gga.8038.1.S1_at   | RFC4      |

|                    |           |
|--------------------|-----------|
| Gga.804.1.S1_at    | TGFBR3    |
| Gga.8043.1.S1_at   | C6orf32   |
| Gga.8046.2.S1_a_at | LYRM5     |
| Gga.805.1.S1_at    | EPHA3     |
| Gga.8061.1.S1_at   | HSCB      |
| Gga.8062.2.S1_at   | ARL6IP1   |
| Gga.8069.1.S1_at   | MGAT4B    |
| Gga.8069.2.S1_a_at | MGAT4B    |
| Gga.8076.2.S1_a_at | GNAL      |
| Gga.8078.1.S1_at   | GAS6      |
| Gga.8081.1.S1_at   | FSTL4     |
| Gga.8088.1.S1_at   | CASP8AP2  |
| Gga.8089.1.S1_at   | KLF1      |
| Gga.8090.1.S1_at   | TAF3      |
| Gga.8101.1.A1_a_at | TOMM7     |
| Gga.8102.1.S1_at   | LOC415871 |
| Gga.8103.2.S1_at   | ARIH2     |
| Gga.8103.3.S1_a_at | ARIH2     |
| Gga.8104.1.S1_at   | HCK       |
| Gga.8109.1.S1_s_at | KIAA0020  |
| Gga.8116.1.S1_at   | SLC46A3   |
| Gga.812.1.S1_at    | HSF1      |
| Gga.8124.1.S1_at   | MUSTN1    |
| Gga.8125.1.S1_at   | GJB1      |
| Gga.8127.1.S1_at   | PUS7      |
| Gga.8128.1.S1_at   | LOC416149 |
| Gga.8129.1.S1_at   | LOC770818 |
| Gga.813.2.S1_at    | LOC396417 |
| Gga.813.3.S1_at    | LOC396417 |
| Gga.8133.1.S1_at   | C10orf65  |
| Gga.8134.1.S1_at   | KLHDC4    |
| Gga.8135.1.S1_at   | COQ10B    |
| Gga.8138.1.S1_at   | ELF3      |
| Gga.8139.1.S1_at   | LOC419389 |
| Gga.8140.1.S1_at   | FGFBP1    |
| Gga.8141.1.S1_at   | EVPL      |
| Gga.8144.2.S1_at   | FAM70A    |
| Gga.815.1.S1_at    | ITGAV     |
| Gga.8154.1.S1_at   | RAB17     |
| Gga.8155.1.S1_at   | AR        |

|                    |              |
|--------------------|--------------|
| Gga.8159.1.S1_at   | LOC422298    |
| Gga.816.1.S1_at    | VIL1         |
| Gga.8163.1.S1_s_at | AGA          |
| Gga.8164.1.S1_a_at | LOC421099    |
| Gga.8164.2.S1_at   | LOC421099    |
| Gga.8173.1.S1_at   | C11orf34     |
| Gga.8174.1.S1_at   | RAB20        |
| Gga.8178.1.S1_at   | C16orf14     |
| Gga.8181.2.S1_a_at | IVNS1ABP     |
| Gga.819.1.S1_at    | TUBB1        |
| Gga.8193.2.S1_x_at | RCCD1        |
| Gga.8194.1.S1_a_at | CEP192       |
| Gga.8199.1.S1_at   | LAD1         |
| Gga.820.1.S1_at    | TNNI3        |
| Gga.8213.1.S1_at   | RCJMB04_10i2 |
| Gga.8216.1.S1_at   | LOC424257    |
| Gga.8218.1.S1_at   | SLC7A9       |
| Gga.8219.1.S1_at   | NDUFA12L     |
| Gga.822.1.S1_a_at  | ELN          |
| Gga.8224.1.S1_at   | LOC422694    |
| Gga.8226.1.S1_at   | LOC431580    |
| Gga.8227.1.S1_s_at | ISG12-1      |
| Gga.823.1.S1_at    | TNNC2        |
| Gga.8232.1.S1_at   | FBXO31       |
| Gga.8237.1.S1_a_at | LOC770630    |
| Gga.8238.1.S1_at   | EDN2         |
| Gga.8239.1.S1_at   | LOC427229    |
| Gga.8241.1.S1_at   | TCF21        |
| Gga.8242.1.S1_at   | PEX12        |
| Gga.8244.1.S1_at   | CMPK2        |
| Gga.8249.1.S1_at   | RPL7L1       |
| Gga.826.1.S1_s_at  | IL8          |
| Gga.8260.1.S1_at   | C8orf80      |
| Gga.8267.2.S1_a_at | C13orf18     |
| Gga.8269.1.S2_at   | TIAL1        |
| Gga.8275.1.S1_at   | LOC417387    |
| Gga.8280.2.S1_a_at | PGAM5        |
| Gga.8287.1.S1_at   | TIPRL        |
| Gga.8290.1.S1_s_at | ANKRD40      |
| Gga.8292.1.S1_at   | CAMTA1       |

|                    |                         |
|--------------------|-------------------------|
| Gga.8293.1.S1_at   | LOC421740               |
| Gga.8296.2.S1_a_at | LOC424241               |
| Gga.8310.2.S1_s_at | C1orf9                  |
| Gga.8312.1.S1_at   | LOC769704               |
| Gga.8312.1.S1_s_at | LOC415787               |
| Gga.8312.2.S1_at   | CES1                    |
| Gga.8312.3.S1_at   | LOC771300               |
| Gga.8312.4.S1_a_at | LOC769339 /// LOC769704 |
| Gga.8313.2.S1_a_at | AGK                     |
| Gga.8313.2.S1_s_at | AGK                     |
| Gga.8327.3.S1_a_at | FXR1                    |
| Gga.8329.1.S1_at   | PRKCH                   |
| Gga.8335.1.S1_at   | TMEM120A                |
| Gga.8336.1.S1_s_at | RCJMB04_21h11           |
| Gga.8342.1.S1_at   | LOC777560               |
| Gga.8352.1.S1_at   | LAMA2                   |
| Gga.8357.1.S1_at   | KIF13A                  |
| Gga.8359.1.S1_at   | GSTA3                   |
| Gga.8360.1.S1_at   | ATOH8                   |
| Gga.8363.1.S1_at   | AXIN2                   |
| Gga.8363.1.S2_at   | AXIN2                   |
| Gga.8365.1.A1_at   | RCJMB04_28l23           |
| Gga.8366.1.S1_at   | ALDH2                   |
| Gga.8368.1.S1_at   | TC2N                    |
| Gga.837.1.S1_a_at  | NPY                     |
| Gga.8373.1.S1_at   | RAPGEF3                 |
| Gga.8374.1.S1_at   | RNF122                  |
| Gga.8376.1.S1_s_at | SNRPD3                  |
| Gga.8379.1.S1_at   | RCJMB04_1g4             |
| Gga.838.1.S1_at    | ATP1A3                  |
| Gga.8382.1.S1_at   | SCAMP5                  |
| Gga.8389.1.S1_at   | LATS1                   |
| Gga.8391.2.S1_at   | LOC423772               |
| Gga.8392.1.S1_at   | EMP1                    |
| Gga.8393.2.S1_a_at | CEP57                   |
| Gga.8394.1.S1_at   | FUNDC2                  |
| Gga.8395.1.S1_at   | LOC769366               |
| Gga.84.1.A1_at     | LOC430062               |
| Gga.84.1.S1_at     | LOC430062               |
| Gga.8400.2.S1_at   | UBE2F                   |

|                    |               |
|--------------------|---------------|
| Gga.8401.1.S1_at   | JTB           |
| Gga.8407.1.S1_s_at | C20orf42      |
| Gga.841.1.S1_at    | MYL2          |
| Gga.8417.3.S1_s_at | RCJMB04_34k12 |
| Gga.842.1.S1_at    | FBXL12        |
| Gga.8423.2.S1_a_at | C18orf45      |
| Gga.8424.1.S1_at   | C9orf21       |
| Gga.8429.2.S1_a_at | LOC420849     |
| Gga.8432.1.S1_at   | C9orf80       |
| Gga.8433.1.S1_a_at | PHACTR1       |
| Gga.8434.1.S1_at   | IGFBP4        |
| Gga.8435.1.S1_at   | LOC771055     |
| Gga.8436.2.A1_at   | C4orf33       |
| Gga.8436.2.S1_a_at | C4orf33       |
| Gga.8445.1.S1_at   | DUSP6         |
| Gga.8446.1.S1_at   | GSR           |
| Gga.8447.1.S1_at   | FGFBP2        |
| Gga.8448.1.S1_at   | HAL           |
| Gga.845.1.S1_at    | LOC426910     |
| Gga.8451.1.S1_a_at | TERF1         |
| Gga.8454.1.S1_at   | LOC426624     |
| Gga.846.1.S1_at    | IL1R1         |
| Gga.8460.1.S1_s_at | GCAT          |
| Gga.8462.1.S1_at   | BUB1B         |
| Gga.8463.1.S1_s_at | CHD1          |
| Gga.8466.1.S1_s_at | SUMO1         |
| Gga.8467.1.S1_a_at | NCAPG         |
| Gga.8468.1.S1_at   | PEX10         |
| Gga.8479.1.S1_at   | FUBP1         |
| Gga.8479.1.S2_at   | FUBP1         |
| Gga.8487.1.S1_at   | SRP72         |
| Gga.8487.2.S1_at   | SRP72         |
| Gga.8488.1.S1_s_at | NDUFV1        |
| Gga.8489.1.S1_at   | FGF9          |
| Gga.8499.2.S1_at   | RPS13         |
| Gga.8499.4.A1_at   | RPS13         |
| Gga.8503.1.S1_at   | NIPSNAP3A     |
| Gga.8506.1.S1_s_at | TRIB2         |
| Gga.8506.1.S2_s_at | TRIB2         |
| Gga.8508.1.S1_s_at | SLA           |

|                    |                      |
|--------------------|----------------------|
| Gga.8508.1.S2_s_at | SLA                  |
| Gga.8509.1.S1_s_at | DNPEP                |
| Gga.8515.1.S1_at   | LHFPL5               |
| Gga.8517.1.S1_at   | LDLR                 |
| Gga.8529.1.S1_at   | CREB1                |
| Gga.8529.1.S2_at   | CREB1                |
| Gga.8535.1.S2_at   | UNC5C                |
| Gga.8537.1.S1_at   | TNKS2                |
| Gga.854.1.S1_a_at  | LGALS1               |
| Gga.8542.3.S1_a_at | ATP5O                |
| Gga.8548.3.S1_s_at | BTF3L4               |
| Gga.8557.1.S1_at   | IL17F                |
| Gga.8559.2.S1_a_at | LOC769871 /// TADA1L |
| Gga.8563.1.A1_at   | SDC1                 |
| Gga.8567.1.S1_at   | STAT3                |
| Gga.8587.1.S1_at   | LOC427125            |
| Gga.8594.1.S1_at   | SLC5A1               |
| Gga.862.1.S1_at    | GJD3                 |
| Gga.8622.1.S1_at   | LOC770708            |
| Gga.863.1.S1_at    | GJA5                 |
| Gga.8635.1.S1_at   | SLC5A1               |
| Gga.866.1.S1_at    | COL17A1              |
| Gga.8674.1.S1_s_at | RCJMB04_26f20        |
| Gga.8676.1.S1_at   | C14orf83             |
| Gga.870.2.S1_a_at  | FGFR1                |
| Gga.8702.1.S1_at   | DUSP15               |
| Gga.871.1.S1_at    | SLC2A3               |
| Gga.873.2.S1_a_at  | LOC396522            |
| Gga.8731.1.S1_at   | RGS14                |
| Gga.8732.1.S1_at   | PLK3                 |
| Gga.8736.1.S1_at   | MICAL1               |
| Gga.8737.1.S1_at   | MAL2                 |
| Gga.8747.1.S1_at   | LOC429710            |
| Gga.876.1.S1_s_at  | B-G                  |
| Gga.8763.1.S1_at   | YTHDC1               |
| Gga.877.1.S1_at    | ATP2A1               |
| Gga.8771.1.S1_at   | FGFRL1               |
| Gga.8774.1.S1_s_at | TNFSF10              |
| Gga.8774.1.S2_s_at | TNFSF10              |
| Gga.8779.2.S1_a_at | E4F1                 |

|                    |              |
|--------------------|--------------|
| Gga.878.1.S1_at    | PVALB        |
| Gga.8786.1.S1_at   | LGR4         |
| Gga.8798.1.S1_at   | TMEM34       |
| Gga.8803.1.S1_at   | FCF1         |
| Gga.8804.1.S1_at   | RCJMB04_1k19 |
| Gga.881.1.S1_at    | ZBTB17       |
| Gga.8814.1.A1_at   | NANS         |
| Gga.8817.1.S1_s_at | FDFT1        |
| Gga.882.1.S1_at    | MYBPH        |
| Gga.8829.1.S1_s_at | WASL         |
| Gga.8836.1.S1_at   | FAM100A      |
| Gga.8837.1.S1_at   | LOC771289    |
| Gga.8838.1.S1_at   | LOC427079    |
| Gga.8839.1.S1_at   | TUBD1        |
| Gga.8839.2.S1_a_at | TUBD1        |
| Gga.884.1.S1_at    | ATP4B        |
| Gga.8850.1.S1_at   | KBTBD2       |
| Gga.8851.1.S1_a_at | IDI1         |
| Gga.8853.3.S1_s_at | SULT1B1      |
| Gga.8854.1.S1_at   | ZBTB43       |
| Gga.8858.1.S1_s_at | FKBP7        |
| Gga.8860.1.S1_at   | BRD1         |
| Gga.8861.1.S1_at   | MAP3K8       |
| Gga.8864.1.S1_at   | AMD1         |
| Gga.8868.1.S1_at   | GDE1         |
| Gga.887.1.S1_at    | OCM2         |
| Gga.8873.1.S1_a_at | NMI          |
| Gga.8876.1.S1_at   | AQP11        |
| Gga.8877.1.S1_at   | ATXN7L1      |
| Gga.8878.1.S1_at   | DGKD         |
| Gga.888.1.S1_at    | COL6A3       |
| Gga.8880.1.S1_at   | MME          |
| Gga.8880.2.S1_s_at | MME          |
| Gga.8886.2.S1_at   | DPP4         |
| Gga.889.1.S1_at    | ITGA3        |
| Gga.8898.1.S1_at   | PARL         |
| Gga.89.1.A1_x_at   | CDH8         |
| Gga.8903.2.S1_s_at | PPP2R5C      |
| Gga.8906.2.S1_s_at | EIF5         |
| Gga.8917.1.S1_at   | MEP1A        |

|                    |                         |
|--------------------|-------------------------|
| Gga.8919.1.S1_at   | WDFY3                   |
| Gga.8923.1.S1_s_at | PPP1R16B                |
| Gga.8926.3.S1_at   | AZIN1 /// LOC777341     |
| Gga.8930.1.S1_at   | OSBPL6                  |
| Gga.8931.1.S1_at   | PLIN                    |
| Gga.8932.1.S1_at   | CRHR2                   |
| Gga.8941.3.S1_s_at | TXN2                    |
| Gga.8944.3.S1_s_at | LOC424393 /// LOC776927 |
| Gga.895.1.S1_at    | S100A6                  |
| Gga.8962.1.S1_at   | LOC769755               |
| Gga.8972.2.S1_a_at | FABP6                   |
| Gga.8975.1.S1_s_at | LOC420381               |
| Gga.8977.1.S1_at   | C1orf58                 |
| Gga.8980.1.S1_s_at | ACAD11                  |
| Gga.8981.1.S1_at   | LOC424832               |
| Gga.8983.1.S1_s_at | RCJMB04_31m22           |
| Gga.8986.1.S1_at   | THOC7                   |
| Gga.8990.2.S1_s_at | RCJMB04_31e20           |
| Gga.8996.1.S1_at   | PCDH24                  |
| Gga.8999.1.S1_at   | AKAP13                  |
| Gga.90.1.S1_at     | MEOX2                   |
| Gga.900.1.S1_at    | ADORA3                  |
| Gga.901.1.S1_at    | KRTAP10-4               |
| Gga.9012.1.S1_at   | STK17B                  |
| Gga.9013.2.S1_s_at | FKBP4                   |
| Gga.9018.1.S1_at   | KIAA0494                |
| Gga.9020.1.S1_at   | ATN1                    |
| Gga.9023.1.S1_at   | SNX4                    |
| Gga.9023.2.S1_a_at | SNX4                    |
| Gga.9025.1.S1_at   | C1R                     |
| Gga.9027.1.S1_at   | SCARB1                  |
| Gga.9028.1.S1_s_at | RCJMB04_1d11            |
| Gga.9029.1.S1_at   | BECN1                   |
| Gga.9033.1.S1_at   | RCJMB04_13d16           |
| Gga.9036.1.S1_a_at | ETHE1                   |
| Gga.9037.1.S1_at   | DOCK9                   |
| Gga.9039.1.S1_at   | GOLM1                   |
| Gga.9043.1.S1_at   | WHSC2                   |
| Gga.9052.1.S1_at   | LOC768655               |
| Gga.9060.1.S1_at   | LOC770392               |



|                    |                                 |
|--------------------|---------------------------------|
| Gga.9062.1.S1_at   | ENPP3                           |
| Gga.9074.2.S1_s_at | C12orf10                        |
| Gga.9075.1.S1_at   | TCN2                            |
| Gga.9077.1.S1_at   | HVCN1                           |
| Gga.9079.1.S1_at   | ABI2                            |
| Gga.9081.1.S1_at   | DNAJC3                          |
| Gga.9083.1.S1_at   | KCNA2                           |
| Gga.9086.1.S1_at   | RHAG                            |
| Gga.9086.1.S2_at   | RHAG                            |
| Gga.9088.1.S1_at   | SS2                             |
| Gga.909.1.S1_at    | SLIT2                           |
| Gga.9103.1.S1_at   | LYG2                            |
| Gga.9126.2.S1_at   | CHIR-A2 /// LOC425308 /// LOC4. |
| Gga.9127.1.S1_at   | ATP10D                          |
| Gga.913.1.S1_at    | FZR1                            |
| Gga.9132.1.S1_s_at | AARS                            |
| Gga.9133.1.S1_at   | LOC417536                       |
| Gga.9136.1.S1_at   | TACSTD1                         |
| Gga.9136.2.S1_a_at | TACSTD1                         |
| Gga.9136.2.S1_x_at | TACSTD1                         |
| Gga.9138.1.S1_at   | GMIP                            |
| Gga.914.2.S1_at    | CDH1-A                          |
| Gga.9147.1.S1_at   | LOC424588                       |
| Gga.9149.1.S1_at   | HDHD2                           |
| Gga.915.1.S1_at    | SOCS3                           |
| Gga.9152.1.S1_at   | TMEM169                         |
| Gga.9154.3.S1_x_at | PACS2                           |
| Gga.9156.1.S1_s_at | TMEM57                          |
| Gga.9157.2.S1_a_at | COX19                           |
| Gga.9158.1.S1_at   | AHSA2                           |
| Gga.916.1.S2_at    | IFNG                            |
| Gga.9160.2.S1_a_at | DNAJB6                          |
| Gga.9160.3.S1_at   | DNAJB6                          |
| Gga.9161.1.S1_at   | PANK3                           |
| Gga.9165.2.S1_at   | C6orf163                        |
| Gga.9168.1.S1_at   | S100B                           |
| Gga.9174.1.S1_at   | KCTD10                          |
| Gga.9174.3.S1_a_at | KCTD10                          |
| Gga.9174.3.S1_x_at | KCTD10                          |
| Gga.918.1.S1_at    | KCNMB1                          |

|                    |                                 |
|--------------------|---------------------------------|
| Gga.9181.5.A1_at   | RPS25                           |
| Gga.9185.1.S1_at   | LOC427196                       |
| Gga.9186.1.S1_s_at | NEURL                           |
| Gga.9187.1.S1_s_at | PRPSAP1                         |
| Gga.92.1.S1_at     | AGMAT /// LOC771697             |
| Gga.920.1.S1_at    | SP1                             |
| Gga.9203.1.S1_s_at | RCJMB04_16e10                   |
| Gga.9205.1.S1_at   | PLAC8                           |
| Gga.9211.3.S1_at   | LOC426157 /// PCF11             |
| Gga.9212.1.S1_s_at | NOL14                           |
| Gga.9219.1.S1_at   | MPHOSPH10                       |
| Gga.9224.2.S1_a_at | MRPS10                          |
| Gga.9229.2.S1_a_at | ATRX                            |
| Gga.9235.1.S1_at   | ELMOD2                          |
| Gga.9238.1.S1_at   | LEPR                            |
| Gga.9239.1.S1_s_at | HLA-G /// LOC417056 /// LOC417  |
| Gga.924.1.S1_at    | BF2                             |
| Gga.9244.2.S1_a_at | TEKT4                           |
| Gga.9260.1.S1_at   | LOC417053 /// LOC417057 /// LOC |
| Gga.9262.1.S1_at   | HMGA1                           |
| Gga.9263.1.S1_at   | JMJD2C                          |
| Gga.9265.1.S1_at   | MSH2                            |
| Gga.9267.1.S1_at   | PLA2G6                          |
| Gga.927.1.S1_at    | ANPEP                           |
| Gga.9270.2.S1_a_at | SERHL2                          |
| Gga.9276.2.S1_s_at | LOC772074                       |
| Gga.9278.1.S1_at   | CETN3                           |
| Gga.9282.1.S1_s_at | EIF2AK4                         |
| Gga.9290.1.S1_at   | HS2ST1                          |
| Gga.9290.1.S2_at   | HS2ST1                          |
| Gga.9293.1.S1_at   | FN1                             |
| Gga.9294.1.S1_at   | IMP3                            |
| Gga.9299.1.S1_at   | CPT1A                           |
| Gga.930.1.S1_at    | AKT2                            |
| Gga.9303.1.S1_at   | RCJMB04_5h14                    |
| Gga.9305.1.S1_at   | LOC416033                       |
| Gga.9307.1.S1_at   | NPTX2                           |
| Gga.931.1.A1_at    | PLAT                            |
| Gga.9311.1.S1_at   | FASTKD2                         |
| Gga.9313.1.S1_at   | GRRP1                           |

|                    |              |
|--------------------|--------------|
| Gga.9314.1.S1_at   | SOX4         |
| Gga.9315.1.S1_at   | KRT222P      |
| Gga.9319.1.S1_at   | ADPRHL1      |
| Gga.9320.1.S1_at   | WEE1         |
| Gga.9327.1.S1_at   | C4orf34      |
| Gga.9334.1.S1_at   | SGK1         |
| Gga.9334.2.S1_a_at | SGK1         |
| Gga.9336.1.S1_at   | GSPT1        |
| Gga.9338.1.S1_at   | HINTW        |
| Gga.9341.1.S1_at   | USP7         |
| Gga.9341.3.S1_a_at | USP7         |
| Gga.9342.1.S1_at   | AVEN         |
| Gga.9346.3.S1_a_at | VIM          |
| Gga.9347.2.S1_s_at | NFRKB        |
| Gga.9347.3.S1_a_at | NFRKB        |
| Gga.936.1.S1_at    | SFTPA1       |
| Gga.9362.2.S1_at   | LOC423783    |
| Gga.9364.1.S1_at   | IGFBP5       |
| Gga.9366.3.S1_a_at | RIOK1        |
| Gga.9367.2.S1_s_at | TDRD3        |
| Gga.937.1.S1_at    | SOD2         |
| Gga.9376.3.S1_at   | GARS         |
| Gga.9378.1.S1_s_at | RCJMB04_1j7  |
| Gga.9378.2.S1_at   | RCJMB04_1j7  |
| Gga.938.1.S1_at    | IKZF2        |
| Gga.9382.1.A1_at   | GEMIN4       |
| Gga.9385.1.S1_a_at | SIVA1        |
| Gga.9386.1.S1_at   | RBP7         |
| Gga.9387.1.S1_at   | GGT1         |
| Gga.939.1.S1_at    | LOC395310    |
| Gga.9390.1.S1_at   | RCJMB04_4h19 |
| Gga.94.1.S1_at     | KHSRP        |
| Gga.9403.1.S1_a_at | CCDC109B     |
| Gga.9404.1.S1_at   | PCSK2        |
| Gga.9414.1.S1_at   | FAM101B      |
| Gga.9423.3.S1_s_at | SELT         |
| Gga.943.1.S1_s_at  | GRIA1        |
| Gga.944.1.S1_at    | CENPH        |
| Gga.9457.1.S1_at   | LOC416888    |
| Gga.9466.1.S1_s_at | C17orf63     |

|                    |               |
|--------------------|---------------|
| Gga.9467.1.S1_at   | ITM2B         |
| Gga.9471.1.S1_at   | ANGPT1        |
| Gga.9472.1.S1_s_at | LIN52         |
| Gga.9473.1.S1_at   | ITGB5         |
| Gga.9475.1.A1_at   | DAG1          |
| Gga.9475.1.S1_at   | DAG1          |
| Gga.9475.1.S1_x_at | DAG1          |
| Gga.9476.1.S1_at   | ROR1          |
| Gga.9478.1.S1_at   | BSX           |
| Gga.9483.1.S1_at   | LOC414835     |
| Gga.9495.2.S1_a_at | RIPK5         |
| Gga.9499.1.S1_s_at | HS6ST2        |
| Gga.950.1.S1_at    | HPSE          |
| Gga.9502.1.S1_s_at | BHLHB4        |
| Gga.9503.1.S1_s_at | PCDH17        |
| Gga.9505.1.A1_at   | PCDHGC5       |
| Gga.9507.1.A1_at   | FAT3          |
| Gga.9509.1.S1_at   | BMP10         |
| Gga.951.1.S1_at    | TULP1         |
| Gga.9510.1.S1_at   | RCJMB04_5f2   |
| Gga.9512.1.S1_s_at | HIBCH         |
| Gga.9513.1.S1_a_at | CXCL12        |
| Gga.9513.1.S2_at   | CXCL12        |
| Gga.9514.1.S1_at   | HAAO          |
| Gga.9517.1.S1_at   | DENND4A       |
| Gga.9518.1.S1_at   | C6orf117      |
| Gga.952.1.S1_at    | NKX2-1        |
| Gga.9525.1.S1_s_at | KIAA1946      |
| Gga.9528.1.S1_at   | EFCBP1        |
| Gga.9530.1.S1_s_at | C14orf143     |
| Gga.9531.1.S1_at   | CAMP          |
| Gga.9534.1.S1_at   | ZDHHC6        |
| Gga.9536.1.S1_s_at | CCDC131       |
| Gga.9540.1.S1_s_at | MOSPD2        |
| Gga.9547.1.S1_at   | SLC7A3        |
| Gga.9554.1.S1_at   | FAM120A       |
| Gga.9556.1.S1_at   | ZBTB34        |
| Gga.9563.1.S1_at   | CCL4 /// CCL5 |
| Gga.9565.1.S1_at   | C1orf55       |
| Gga.9566.1.S1_at   | SLC25A37      |

|                    |                                |
|--------------------|--------------------------------|
| Gga.9566.2.S1_s_at | SLC25A37                       |
| Gga.9567.1.S1_at   | B3GNT7                         |
| Gga.9573.1.S1_at   | ECM2                           |
| Gga.9574.1.S1_at   | LOC419390                      |
| Gga.9577.1.S1_at   | TUBGCP4                        |
| Gga.9580.1.S1_at   | AKR1B1 /// LOC425137 /// LOC75 |
| Gga.9582.1.S1_at   | RNPC3                          |
| Gga.9582.2.S1_a_at | RNPC3                          |
| Gga.9587.2.S1_at   | CCDC141                        |
| Gga.959.1.S1_at    | SOX18                          |
| Gga.9591.1.S1_s_at | AGAP1                          |
| Gga.9592.1.S1_at   | DOK5                           |
| Gga.9593.1.S1_at   | EMP2                           |
| Gga.9597.1.S1_at   | UBAC2                          |
| Gga.96.2.S1_at     | GJD2                           |
| Gga.960.1.S1_at    | VIPR1                          |
| Gga.9600.2.S1_at   | DCTN5                          |
| Gga.9605.1.S1_s_at | PARP4                          |
| Gga.9608.1.S1_at   | HSPA4                          |
| Gga.961.2.S1_at    | TBX5                           |
| Gga.9610.1.S1_at   | BMS1                           |
| Gga.9610.1.S1_s_at | BMS1                           |
| Gga.9614.1.S1_at   | SYN2                           |
| Gga.9616.1.S1_at   | DCUN1D4                        |
| Gga.9617.1.S1_at   | PRR5                           |
| Gga.9617.2.S1_at   | PRR5                           |
| Gga.9619.1.S1_at   | LOC769963                      |
| Gga.9619.2.S1_s_at | PAFAH2                         |
| Gga.962.1.S1_a_at  | PITX1                          |
| Gga.9623.1.S1_a_at | CAMK2A                         |
| Gga.9624.1.S1_at   | GLTPD1                         |
| Gga.9626.1.S1_s_at | RCJMB04_8d19                   |
| Gga.9626.3.S1_s_at | RCJMB04_8d19                   |
| Gga.9632.1.S1_at   | RPAP2                          |
| Gga.9632.2.S1_a_at | RPAP2                          |
| Gga.9634.1.S1_at   | DECR1                          |
| Gga.9635.3.S1_at   | LOC769384                      |
| Gga.9636.1.S1_at   | SNORA32                        |
| Gga.9637.2.S1_a_at | SAT1                           |
| Gga.9639.1.S1_at   | HPGD                           |

|                    |                |
|--------------------|----------------|
| Gga.9641.1.S1_at   | CYP3A80        |
| Gga.9643.1.S1_at   | ANXA13         |
| Gga.9646.1.S1_at   | YIPF5          |
| Gga.9651.1.S1_at   | ZBTB25         |
| Gga.9652.1.S1_at   | SERPINA4       |
| Gga.9654.1.S1_at   | C9orf100       |
| Gga.9655.1.S1_at   | MND1 /// TRIM2 |
| Gga.9659.1.S1_s_at | SPTBN1         |
| Gga.9662.2.S1_a_at | C15orf42       |
| Gga.9663.2.S1_a_at | DALRD3         |
| Gga.9663.3.S1_a_at | DALRD3         |
| Gga.9667.1.S1_s_at | CHODL          |
| Gga.9668.1.S1_s_at | ATRX           |
| Gga.9670.1.S1_at   | FAH            |
| Gga.9674.1.S1_at   | TRIM55         |
| Gga.9675.1.S1_at   | PDGFD          |
| Gga.9676.1.S1_s_at | HCFC2          |
| Gga.9677.1.S1_at   | C17orf39       |
| Gga.9680.3.S1_a_at | RAD51L3        |
| Gga.9681.1.S1_at   | FAM77D         |
| Gga.9682.1.S1_at   | BCLAF1         |
| Gga.9686.2.S1_a_at | RDH10          |
| Gga.9687.1.S1_at   | FAM149A        |
| Gga.969.1.S1_at    | MOXD1          |
| Gga.9692.1.S1_at   | LOC770574      |
| Gga.9693.1.S1_at   | HEATR2         |
| Gga.9693.2.S1_a_at | HEATR2         |
| Gga.9697.1.S1_s_at | PNN            |
| Gga.9699.4.S1_x_at | JMJD7-PLA2G4B  |
| Gga.970.1.S2_at    | LOC395334      |
| Gga.9700.1.S1_at   | TSPAN7         |
| Gga.9700.2.S1_a_at | TSPAN7         |
| Gga.9701.1.S1_at   | DPAGT1         |
| Gga.9701.2.S1_a_at | DPAGT1         |
| Gga.9705.1.S1_at   | EIF1B          |
| Gga.9708.1.S1_at   | PPAP2A         |
| Gga.9708.2.S1_a_at | PPAP2A         |
| Gga.9710.1.S1_at   | SH2D4A         |
| Gga.9711.1.S1_at   | LOC416827      |
| Gga.9713.2.S1_a_at | HINTW          |

|                    |              |
|--------------------|--------------|
| Gga.9721.1.S1_a_at | LOC770114    |
| Gga.9721.2.S1_at   | LOC770050    |
| Gga.9723.2.S1_a_at | LOC422005    |
| Gga.9723.3.S1_a_at | LOC422005    |
| Gga.9731.2.S1_a_at | SPON2        |
| Gga.9740.1.S1_at   | PPCDC        |
| Gga.9740.2.S1_s_at | PPCDC        |
| Gga.9742.1.S1_s_at | SF3A1        |
| Gga.9745.1.S1_at   | LOC418817    |
| Gga.9747.1.S1_a_at | IFT80        |
| Gga.9750.1.S1_s_at | ITCH         |
| Gga.9757.1.S1_at   | RGS5         |
| Gga.976.1.S1_at    | CIRBP        |
| Gga.9760.1.S1_at   | C12orf5      |
| Gga.9763.1.S1_s_at | CDA          |
| Gga.9765.1.S1_at   | ANKRD9       |
| Gga.9766.1.S1_s_at | LEPRE1       |
| Gga.9767.1.S1_at   | MTMR14       |
| Gga.9768.1.S1_at   | PSCDBP       |
| Gga.977.1.S1_at    | PTRF         |
| Gga.977.2.S1_at    | PTRF         |
| Gga.9770.2.S1_at   | C5orf3       |
| Gga.9770.3.S1_a_at | C5orf3       |
| Gga.9773.1.S1_s_at | RBM24        |
| Gga.9778.1.S1_at   | IGHMBP2      |
| Gga.9784.1.S1_at   | POF1B        |
| Gga.9784.2.A1_at   | POF1B        |
| Gga.979.1.S1_at    | PEPCK-M      |
| Gga.9791.1.S1_at   | LOC427134    |
| Gga.9796.1.S1_at   | RUFY1        |
| Gga.9797.1.S1_at   | CBX7         |
| Gga.9799.2.S1_s_at | C4orf20      |
| Gga.98.2.S1_a_at   | TLR2         |
| Gga.9802.1.S1_at   | CCNH         |
| Gga.9803.1.S1_at   | IMPA1        |
| Gga.9806.1.S1_at   | A2LD1        |
| Gga.9809.1.S1_at   | BRD3         |
| Gga.9810.1.S1_s_at | GMPPB        |
| Gga.9815.1.S1_at   | PEX13        |
| Gga.9816.1.S1_s_at | RCJMB04_10k5 |

|                    |                   |       |
|--------------------|-------------------|-------|
| Gga.9819.1.S1_s_at | LOC777379         |       |
| Gga.9821.1.S1_s_at | TTC14             |       |
| Gga.9826.1.S1_at   | RPP30             |       |
| Gga.9827.1.S1_s_at | GOLIM4            |       |
| Gga.9829.1.S1_at   | CA5B              |       |
| Gga.9837.2.S1_a_at | WDR21A            |       |
| Gga.985.1.S1_s_at  | HSP25             |       |
| Gga.9850.1.S1_at   | ARL4A             |       |
| Gga.9853.1.S1_at   | RAB3B             |       |
| Gga.9856.1.A1_s_at | TMEM39A           |       |
| Gga.986.1.S1_s_at  | TNFRSF18          |       |
| Gga.9862.1.S1_at   | USP38             |       |
| Gga.9863.1.S1_at   | LOC768982         |       |
| Gga.9866.2.S1_a_at | RALB              |       |
| Gga.9867.1.S1_at   | SLC9A3R2          |       |
| Gga.9869.1.S1_at   | ZCCHC6            |       |
| Gga.9872.1.S1_at   | HERPUD1           |       |
| Gga.9873.1.S1_at   | C1QC              |       |
| Gga.9880.1.S1_at   | P2RY13            |       |
| Gga.9882.1.S1_at   | CSF2RA            |       |
| Gga.9887.1.S1_s_at | TACC3             |       |
| Gga.9889.1.S1_at   | OXR1              |       |
| Gga.9892.1.S1_at   | IRG1              |       |
| Gga.9899.1.A1_at   | SLC7A3            |       |
| Gga.9899.1.S1_at   | SLC7A3            |       |
| Gga.990.1.S1_at    | LOC770777         |       |
| Gga.9902.1.S1_at   |                   | 41162 |
| Gga.9905.1.S1_at   | ANTXR2            |       |
| Gga.9906.1.S1_at   | METRNL            |       |
| Gga.9908.2.S1_at   | MRPL50            |       |
| Gga.9910.1.S1_at   | C10orf118         |       |
| Gga.9912.1.S1_at   | KLHL6             |       |
| Gga.9915.1.S1_s_at | PECAM1 /// PECAM1 |       |
| Gga.9915.2.S1_at   | PECAM1            |       |
| Gga.9918.1.S1_at   | NOB1              |       |
| Gga.9923.1.S1_at   | LOC417353         |       |
| Gga.9926.1.S1_at   | C17orf62          |       |
| Gga.9931.1.S1_at   | LOC425332         |       |
| Gga.9935.1.S1_at   | DMBT1             |       |
| Gga.9941.1.S1_s_at | THSD7A            |       |



|                         |               |
|-------------------------|---------------|
| Gga.9949.1.S1_at        | NSDHL         |
| Gga.9959.1.S1_s_at      | PAN3          |
| Gga.9961.2.S1_s_at      | ZNF652        |
| Gga.9962.1.S1_at        | RCJMB04_16e10 |
| Gga.9963.1.S1_at        | TBC1D13       |
| Gga.9971.1.S1_at        | ANXA10        |
| Gga.9972.1.S1_at        | RASD1         |
| Gga.9976.1.S1_at        | WDR51A        |
| Gga.9980.2.S1_a_at      | LOC771191     |
| Gga.9986.1.S1_at        | FSCN1         |
| Gga.9987.1.S1_at        | UQCRB         |
| Gga.9993.1.S1_at        | SRP19         |
| Gga.9997.1.S1_at        | KIAA1712      |
| Gga.9999.1.S1_at        | RASA3         |
| GgaAffx.1.1.S1_s_at     | NFKBIA        |
| GgaAffx.1000.1.S1_at    | FN3KRP        |
| GgaAffx.10000.1.S1_at   | NRIP1         |
| GgaAffx.10003.1.S1_s_at | ZFYVE28       |
| GgaAffx.10004.1.S1_at   | C4orf15       |
| GgaAffx.10005.1.S1_at   | POLN          |
| GgaAffx.10011.1.S1_at   | WHSC2         |
| GgaAffx.10012.1.S1_at   | CXADR         |
| GgaAffx.10015.3.S1_s_at | LETM1         |
| GgaAffx.10018.2.S1_s_at | SLBP          |
| GgaAffx.10030.1.S1_at   | MDN1          |
| GgaAffx.10042.3.S1_s_at | ZNF704        |
| GgaAffx.10052.2.S1_at   | GABRR1        |
| GgaAffx.10053.1.S1_at   | ACY1L2        |
| GgaAffx.10057.1.S1_at   | ADAMTS1       |
| GgaAffx.10059.1.S1_at   | ADAMTS5       |
| GgaAffx.10063.1.S1_at   | C6orf165      |
| GgaAffx.10065.1.S1_at   | SLC7A13       |
| GgaAffx.10066.1.S1_s_at | RCJMB04_30p22 |
| GgaAffx.10076.1.S1_at   | NT5E          |
| GgaAffx.10088.2.A1_at   | PRSS35        |
| GgaAffx.10096.1.S1_at   | C6orf157      |
| GgaAffx.10104.2.S1_s_at | ATP6V0D2      |
| GgaAffx.10105.1.S1_s_at | LOC771856     |
| GgaAffx.10108.1.S1_at   | TTK           |
| GgaAffx.10110.1.S1_at   | LCA5          |

|                         |                                 |
|-------------------------|---------------------------------|
| GgaAffx.10124.2.S1_s_at | RIPK2                           |
| GgaAffx.10125.2.S1_at   | LOC422922 /// LOC771804         |
| GgaAffx.10125.3.S1_at   | LOC422923 /// LOC422924 /// LOC |
| GgaAffx.10125.4.S1_at   | LOC422922 /// LOC771804 /// LOC |
| GgaAffx.10125.4.S1_x_at | LOC422922 /// LOC771804 /// LOC |
| GgaAffx.10134.6.S1_s_at | SYNJ1                           |
| GgaAffx.10137.1.S1_at   | TMEM64                          |
| GgaAffx.10149.2.S1_at   | DDX43                           |
| GgaAffx.10150.1.S1_at   | LOC428371                       |
| GgaAffx.10151.1.S1_s_at | RCJMB04_31o3                    |
| GgaAffx.10158.1.S1_at   | PPM2C                           |
| GgaAffx.1016.1.S1_s_at  | WDR76                           |
| GgaAffx.10163.1.S1_s_at | RIMS1                           |
| GgaAffx.10166.1.S1_at   | CDH17                           |
| GgaAffx.10187.1.S1_at   | DPY19L4                         |
| GgaAffx.10187.2.S1_s_at | DPY19L4                         |
| GgaAffx.10197.1.A1_at   | KCNE2                           |
| GgaAffx.10202.1.S1_at   | RCJMB04_21o24                   |
| GgaAffx.10213.1.S1_at   | VPS13B                          |
| GgaAffx.10214.1.S1_at   | RGS22                           |
| GgaAffx.10217.1.S1_s_at | FBXO43 /// LOC426173            |
| GgaAffx.10223.1.S1_at   | SPAG1                           |
| GgaAffx.10223.1.S1_s_at | SPAG1                           |
| GgaAffx.10231.1.S1_at   | RRM2B                           |
| GgaAffx.10236.2.S1_at   | TTC3                            |
| GgaAffx.10239.1.S1_at   | KCNJ15                          |
| GgaAffx.1024.2.S1_s_at  | FOXK2                           |
| GgaAffx.10245.1.S1_at   | BAALC                           |
| GgaAffx.10252.1.S1_s_at | RIMS2                           |
| GgaAffx.10254.1.S1_at   | TM7SF4                          |
| GgaAffx.10256.2.S1_at   | ZFPM2                           |
| GgaAffx.10257.1.S1_at   | OXR1                            |
| GgaAffx.10266.1.S1_at   | EXOC6B                          |
| GgaAffx.10285.1.S1_at   | DSCAM                           |
| GgaAffx.10287.1.S1_at   | BACE2                           |
| GgaAffx.10294.6.S1_s_at | TMPRSS2                         |
| GgaAffx.10298.1.S1_at   | C2CD2                           |
| GgaAffx.10313.1.S1_at   | GPR20                           |
| GgaAffx.1032.3.S1_s_at  | INPP5D                          |
| GgaAffx.10324.1.S1_s_at | UBASH3A                         |

|                        |                                 |
|------------------------|---------------------------------|
| GgaAfx.10332.1.S1_at   | LOC421876                       |
| GgaAfx.1034.1.S1_at    | MLLT1                           |
| GgaAfx.10344.1.S1_at   | TRAPPC9                         |
| GgaAfx.10345.1.S1_at   | KCNK9                           |
| GgaAfx.10347.1.S1_at   | LOC418544                       |
| GgaAfx.10352.1.S1_at   | FAM135B                         |
| GgaAfx.10353.1.S1_at   | CRYAA                           |
| GgaAfx.10358.2.S1_s_at | ZFAT1                           |
| GgaAfx.10363.1.S1_at   | MAOB                            |
| GgaAfx.10363.2.S1_s_at | MAOB                            |
| GgaAfx.10378.1.S1_at   | PHF20L1                         |
| GgaAfx.10380.2.S1_at   | KCNQ3                           |
| GgaAfx.10387.2.S1_at   | OC90                            |
| GgaAfx.10394.1.S1_at   | XK                              |
| GgaAfx.10395.1.S1_at   | LOC428640                       |
| GgaAfx.10419.1.S1_at   | LOC418592 /// LOC768434 /// LOC |
| GgaAfx.10422.1.S1_at   | COL21A1                         |
| GgaAfx.10425.1.S1_at   | HCRTR2                          |
| GgaAfx.1043.1.S1_at    | LOC428238                       |
| GgaAfx.10436.8.S1_s_at | ADCY8                           |
| GgaAfx.10438.1.S1_at   | C6orf142                        |
| GgaAfx.10440.1.S1_at   | KLHL31                          |
| GgaAfx.10451.1.S1_at   | LOC772218                       |
| GgaAfx.10460.1.S1_at   | KLHL15                          |
| GgaAfx.10460.2.S1_s_at | KLHL15                          |
| GgaAfx.10472.1.S1_at   | FAM91A1                         |
| GgaAfx.10475.1.S1_at   | LOC421910                       |
| GgaAfx.10482.1.S1_at   | C8orf32                         |
| GgaAfx.10484.1.S1_at   | ATAD2                           |
| GgaAfx.10492.1.S1_s_at | TSSC1                           |
| GgaAfx.10494.2.S1_s_at | TTC15                           |
| GgaAfx.10498.1.S1_at   | RSAD2                           |
| GgaAfx.10499.1.S1_at   | RNF144A                         |
| GgaAfx.10502.2.S1_s_at | RCJMB04_10b24                   |
| GgaAfx.10506.1.S1_at   | DSCC1                           |
| GgaAfx.10509.2.S1_at   | TAF2                            |
| GgaAfx.10518.1.S1_s_at | MELK                            |
| GgaAfx.10522.1.S1_at   | LOC421935                       |
| GgaAfx.10526.1.S1_at   | ATP6V1C2                        |
| GgaAfx.10526.2.S1_s_at | ATP6V1C2                        |

|                         |                                 |
|-------------------------|---------------------------------|
| GgaAffx.10527.1.A1_at   | KCNF1                           |
| GgaAffx.10528.1.S1_at   | ROCK2                           |
| GgaAffx.1053.1.S1_at    | PIP4K2B                         |
| GgaAffx.10530.1.S1_s_at | LOC421944                       |
| GgaAffx.10538.1.S1_s_at | LOC421952                       |
| GgaAffx.10540.1.S1_at   | KCNS3                           |
| GgaAffx.10553.2.S1_s_at | ATAD2B                          |
| GgaAffx.10555.1.S1_at   | LOC421978                       |
| GgaAffx.10556.1.S1_s_at | RCJMB04_19g9                    |
| GgaAffx.10558.1.S1_s_at | ZNF512                          |
| GgaAffx.10561.2.S1_s_at | NRBP1                           |
| GgaAffx.10567.1.S1_s_at | PHKA2                           |
| GgaAffx.10575.1.S1_s_at | DTNB                            |
| GgaAffx.10579.2.S1_s_at | CDKL5                           |
| GgaAffx.10584.1.S1_x_at | LOC430313 /// LOC775977 /// LOC |
| GgaAffx.10585.1.S1_at   | LOC772331                       |
| GgaAffx.10588.1.S1_at   | NHS                             |
| GgaAffx.10589.1.S1_s_at | REPS2                           |
| GgaAffx.10598.1.S1_s_at | RCJMB04_5k4                     |
| GgaAffx.10603.1.S1_at   | MOSPD2                          |
| GgaAffx.10612.1.S1_s_at | RAB9A                           |
| GgaAffx.10614.2.S1_s_at | SCARA5                          |
| GgaAffx.10617.2.S1_s_at | TLR7                            |
| GgaAffx.1062.2.S1_s_at  | CAMKK1                          |
| GgaAffx.10622.1.S1_at   | LOC768434                       |
| GgaAffx.10633.3.S1_s_at | ADCY3                           |
| GgaAffx.10638.1.S1_at   | SHROOM2                         |
| GgaAffx.10647.3.S1_s_at | NLGN4X                          |
| GgaAffx.10650.3.S1_s_at | EXTL3                           |
| GgaAffx.10653.1.S1_s_at | INTS9                           |
| GgaAffx.1066.1.S1_at    | LOC427799                       |
| GgaAffx.10660.1.S1_at   | ARSD                            |
| GgaAffx.10661.1.S1_at   | C8orf13                         |
| GgaAffx.10667.1.A1_at   | PAQR8                           |
| GgaAffx.1068.1.S1_at    | CD7                             |
| GgaAffx.10684.1.S1_at   | MUT                             |
| GgaAffx.10691.2.S1_s_at | ENPP4                           |
| GgaAffx.10694.1.S1_at   | GTPBP6                          |
| GgaAffx.107.1.S1_at     | ISOC1                           |
| GgaAffx.10704.2.S1_at   | TMEM166                         |

|                         |               |
|-------------------------|---------------|
| GgaAffx.10707.1.S1_s_at | NIPA1         |
| GgaAffx.10727.2.S1_at   | ATP10A        |
| GgaAffx.10727.3.S1_s_at | ATP10A        |
| GgaAffx.10727.5.S1_s_at | ATP10A        |
| GgaAffx.10730.1.S1_at   | LOC418688     |
| GgaAffx.10732.1.S1_at   | RCJMB04_3o8   |
| GgaAffx.10735.1.S1_at   | MITD1         |
| GgaAffx.10742.1.S1_at   | IL1R2         |
| GgaAffx.10743.1.S1_at   | IL1RL2        |
| GgaAffx.10745.1.S1_at   | IL18R1        |
| GgaAffx.10747.1.S1_at   | SLC9A4        |
| GgaAffx.10750.1.S1_at   | MFSD9         |
| GgaAffx.10754.1.S1_at   | UXS1          |
| GgaAffx.1076.1.S1_at    | MANEAL        |
| GgaAffx.10774.1.S1_s_at | PCID2         |
| GgaAffx.10777.1.S1_at   | LOC418747     |
| GgaAffx.10777.1.S1_s_at | LOC418747     |
| GgaAffx.10777.2.S1_s_at | MCF2L         |
| GgaAffx.10787.2.S1_s_at | ARHGEF7       |
| GgaAffx.10788.1.S1_at   | SLC10A2       |
| GgaAffx.10801.1.S1_at   | NALCN         |
| GgaAffx.10807.1.A1_at   | EBI2          |
| GgaAffx.10807.1.S1_at   | EBI2          |
| GgaAffx.10813.5.S1_s_at | RCJMB04_30a20 |
| GgaAffx.10827.7.S1_s_at | ABCC4         |
| GgaAffx.10828.1.S1_at   | GPR180        |
| GgaAffx.10840.1.S1_at   | CLN5          |
| GgaAffx.10842.3.S1_s_at | TBC1D4        |
| GgaAffx.10846.1.S1_at   | PCDH20        |
| GgaAffx.10847.1.S1_at   | DIAPH3        |
| GgaAffx.10853.1.S1_s_at | NARG1L        |
| GgaAffx.10853.2.S1_s_at | NARG1L        |
| GgaAffx.10856.1.S1_at   | LOC428066     |
| GgaAffx.10860.1.S1_at   | DGKH          |
| GgaAffx.10860.2.S1_s_at | DGKH          |
| GgaAffx.10863.1.S1_at   | TNFSF11       |
| GgaAffx.10869.1.S1_at   | SLC25A30      |
| GgaAffx.10876.2.S1_s_at | LCPI          |
| GgaAffx.10881.1.S1_at   | SUCLA2        |
| GgaAffx.10885.1.S1_at   | SETDB2        |

|                        |                      |
|------------------------|----------------------|
| GgaAfx.10885.2.S1_s_at | SETDB2               |
| GgaAfx.10886.1.S1_at   | KPNA3                |
| GgaAfx.10891.1.S1_s_at | DHRS12 /// LOC418878 |
| GgaAfx.10901.4.S1_at   | ATP7B                |
| GgaAfx.10909.1.S1_at   | COG6                 |
| GgaAfx.10909.2.S1_s_at | COG6                 |
| GgaAfx.10912.1.S1_at   | C13orf23             |
| GgaAfx.10913.1.S1_at   | STOML3               |
| GgaAfx.10919.1.S1_at   | CCNA1                |
| GgaAfx.10923.1.S1_at   | DCLK1                |
| GgaAfx.10930.1.S1_at   | STARD13              |
| GgaAfx.10933.1.S1_s_at | FRY                  |
| GgaAfx.10937.1.S1_at   | HSPH1                |
| GgaAfx.10937.3.S1_s_at | HSPH1                |
| GgaAfx.10939.1.S1_at   | SLC7A1               |
| GgaAfx.10945.1.S1_s_at | SLC46A3              |
| GgaAfx.1095.1.S1_at    | NUP88                |
| GgaAfx.10954.1.S1_at   | USP12                |
| GgaAfx.10968.4.S1_s_at | ATP8A2               |
| GgaAfx.1097.1.S1_at    | SETBP1               |
| GgaAfx.10975.1.S1_at   | MIPEP                |
| GgaAfx.10975.2.S1_s_at | MIPEP                |
| GgaAfx.1098.1.S1_s_at  | PRKAB2               |
| GgaAfx.10983.1.S1_at   | RCJMB04_9b21         |
| GgaAfx.10985.1.S1_at   | CENPJ                |
| GgaAfx.10995.1.S1_at   | EXPH5                |
| GgaAfx.10997.2.S1_s_at | EXPH5 /// KDELC2     |
| GgaAfx.11003.1.A1_at   | RAB39                |
| GgaAfx.11003.1.S1_at   | RAB39                |
| GgaAfx.11009.3.S1_s_at | GUCY1A2              |
| GgaAfx.11012.1.S1_at   | AASDHPPT             |
| GgaAfx.11012.2.S1_s_at | AASDHPPT             |
| GgaAfx.11017.1.S1_s_at | DYNC2H1              |
| GgaAfx.11017.4.S1_s_at | DYNC2H1              |
| GgaAfx.11018.1.S1_s_at | MMP1                 |
| GgaAfx.11032.1.S1_at   | LOC418990            |
| GgaAfx.11035.1.S1_s_at | FAM76B               |
| GgaAfx.1104.1.S1_s_at  | PPP2R4               |
| GgaAfx.11051.1.S1_at   | CCDC67               |
| GgaAfx.11053.2.S1_s_at | SLC36A4              |

|                         |                                |
|-------------------------|--------------------------------|
| GgaAffx.11079.1.S1_at   | ARHGEF19                       |
| GgaAffx.11083.1.S1_at   | FGF23                          |
| GgaAffx.11085.1.S1_at   | MLSTD1                         |
| GgaAffx.11090.1.S1_at   | LOC419050                      |
| GgaAffx.11092.1.S1_s_at | POLD3                          |
| GgaAffx.11103.1.S1_at   | DNAJB13                        |
| GgaAffx.11124.1.S1_s_at | LOC769317 /// OR52R1           |
| GgaAffx.11131.1.S1_at   | REEP2                          |
| GgaAffx.11133.1.A1_s_at | RCJMB04_4f12                   |
| GgaAffx.11133.1.S1_s_at | RCJMB04_4f12                   |
| GgaAffx.11145.1.S1_at   | LOC429723                      |
| GgaAffx.11152.1.S1_at   | CHCHD8                         |
| GgaAffx.11161.1.S1_at   | LOC429831                      |
| GgaAffx.11172.1.S1_s_at | OR10A7                         |
| GgaAffx.11180.1.S1_at   | C16orf35                       |
| GgaAffx.11181.1.S1_at   | TDRKH                          |
| GgaAffx.1120.1.S1_at    | DDEFL1                         |
| GgaAffx.11201.1.S1_s_at | TLR6                           |
| GgaAffx.11201.2.S1_s_at | LOC768669 /// TLR16 /// TLR6   |
| GgaAffx.11201.3.S1_s_at | LOC768669 /// TLR16 /// TLR6   |
| GgaAffx.11212.1.S1_s_at | LCORL                          |
| GgaAffx.11214.1.S1_at   | LOC776768                      |
| GgaAffx.11214.1.S1_x_at | LOC776768                      |
| GgaAffx.11214.2.S1_at   | LOC427569                      |
| GgaAffx.11221.1.S1_s_at | WDSOF1                         |
| GgaAffx.11239.1.S1_at   | TSC1                           |
| GgaAffx.11240.1.S1_at   | LOC772235                      |
| GgaAffx.11249.1.S1_at   | CCDC83                         |
| GgaAffx.11257.1.S1_at   | THUMPD2                        |
| GgaAffx.11258.2.S1_s_at | ATRN                           |
| GgaAffx.11258.4.S1_s_at | ATRN                           |
| GgaAffx.11259.2.S1_at   | LOC776280                      |
| GgaAffx.11259.3.S1_s_at | CD5L /// LOC425218 /// LOC4258 |
| GgaAffx.11274.1.S1_at   | FBN2                           |
| GgaAffx.11281.1.S1_at   | LOC425564                      |
| GgaAffx.11284.1.S1_at   | QPCTL                          |
| GgaAffx.11288.1.S1_s_at | PEO1                           |
| GgaAffx.11292.2.S1_s_at | LOC425334 /// RHBDF1           |
| GgaAffx.11293.1.S1_s_at | WWC3                           |
| GgaAffx.11302.1.S1_at   | LOC417738 /// LOC776729        |

|                         |                                |
|-------------------------|--------------------------------|
| GgaAffx.11302.2.S1_at   | LOC417738 /// LOC776729        |
| GgaAffx.11320.2.S1_at   | FBXO38 /// LOC426479 /// LOC42 |
| GgaAffx.11324.1.S1_at   | CDC42SE2                       |
| GgaAffx.11325.1.S1_at   | LOC425984                      |
| GgaAffx.11327.1.S1_at   | KCNS2                          |
| GgaAffx.11331.1.S1_at   | KIAA1324L                      |
| GgaAffx.11335.1.S1_at   | CYLD                           |
| GgaAffx.11352.1.S1_at   | KIAA0802                       |
| GgaAffx.11357.1.S1_at   | LOC430965                      |
| GgaAffx.11358.1.S1_s_at | ZC3HAV1                        |
| GgaAffx.11359.7.S1_at   | SGSM1                          |
| GgaAffx.11364.2.S1_s_at | MTBP                           |
| GgaAffx.11368.1.S1_at   | PRIM1                          |
| GgaAffx.11375.1.S1_at   | RCJMB04_1a13                   |
| GgaAffx.11396.1.S1_s_at | C20orf59                       |
| GgaAffx.114.1.S1_s_at   | SLC27A6                        |
| GgaAffx.11402.1.S1_at   | NEK2                           |
| GgaAffx.11404.1.S1_at   | MXI1                           |
| GgaAffx.11413.1.S1_s_at | RCJMB04_1f5                    |
| GgaAffx.11414.1.S1_s_at | EIF2S3                         |
| GgaAffx.11416.1.S1_s_at | TAF8                           |
| GgaAffx.11417.1.S1_at   | KIF11                          |
| GgaAffx.11418.1.S1_at   | XPO4                           |
| GgaAffx.11423.1.S1_at   | RCJMB04_1g4                    |
| GgaAffx.11425.1.S1_at   | UMPS                           |
| GgaAffx.11426.1.S1_at   | TNFRSF18                       |
| GgaAffx.11429.1.S1_s_at | MMP7                           |
| GgaAffx.11430.1.S1_s_at | SH3KBP1                        |
| GgaAffx.11431.1.S1_at   | SNX13                          |
| GgaAffx.11433.1.S1_s_at | RCJMB04_1g23                   |
| GgaAffx.11438.1.S1_s_at | SLCO4A1                        |
| GgaAffx.11439.1.S1_at   | SPATA6                         |
| GgaAffx.11440.1.S1_s_at | RCJMB04_1h22                   |
| GgaAffx.11447.1.S1_s_at | SF3B3                          |
| GgaAffx.11450.1.A1_at   | GALK2                          |
| GgaAffx.11458.1.S1_at   | C10orf46                       |
| GgaAffx.11459.1.S1_s_at | RCJMB04_1j12                   |
| GgaAffx.11462.1.S1_at   | ZNF706                         |
| GgaAffx.11466.1.S1_at   | C14orf169                      |
| GgaAffx.11467.1.S1_s_at | CDK2AP1                        |



|                         |              |
|-------------------------|--------------|
| GgaAffx.11470.1.S1_at   | LAPTM4A      |
| GgaAffx.11470.1.S1_s_at | LAPTM4A      |
| GgaAffx.11475.1.S1_s_at | RCJMB04_1112 |
| GgaAffx.11480.1.S1_s_at | UFM1         |
| GgaAffx.11481.1.S1_s_at | USP6NL       |
| GgaAffx.11486.1.S1_at   | C9orf41      |
| GgaAffx.11490.1.S1_s_at | KIAA1524     |
| GgaAffx.11491.1.S1_s_at | SLC25A4      |
| GgaAffx.11494.1.S1_s_at | C20orf24     |
| GgaAffx.11495.1.S1_at   | RCJMB04_1n22 |
| GgaAffx.11495.1.S1_s_at | RCJMB04_1n22 |
| GgaAffx.11512.1.S1_at   | TRAFD1       |
| GgaAffx.11513.1.S1_at   | CCNE2        |
| GgaAffx.11513.1.S1_s_at | CCNE2        |
| GgaAffx.11519.1.S1_at   | RHOG         |
| GgaAffx.11524.1.S1_s_at | CCT4         |
| GgaAffx.11525.1.S1_s_at | RCJMB04_2c8  |
| GgaAffx.11527.1.S1_at   | RCJMB04_2c16 |
| GgaAffx.11527.1.S1_s_at | RCJMB04_2c16 |
| GgaAffx.1153.1.S1_s_at  | CCDC5        |
| GgaAffx.11530.1.S1_at   | RCJMB04_2d1  |
| GgaAffx.11549.1.S1_s_at | LOC776223    |
| GgaAffx.11551.1.S1_s_at | RCJMB04_2h11 |
| GgaAffx.11552.1.S1_s_at | C5orf41      |
| GgaAffx.11554.1.S1_at   | TBL3         |
| GgaAffx.11557.1.S1_s_at | NOL5A        |
| GgaAffx.11560.1.S1_s_at | MERTK        |
| GgaAffx.11561.1.S1_at   | C14orf129    |
| GgaAffx.11562.1.S1_s_at | ORC1L        |
| GgaAffx.11563.1.S1_s_at | CCNC         |
| GgaAffx.11564.1.S1_at   | WDSUB1       |
| GgaAffx.11565.1.S1_at   | RCJMB04_2i22 |
| GgaAffx.1157.1.S1_at    | LOC415660    |
| GgaAffx.11572.1.S1_at   | PNRC2        |
| GgaAffx.11575.1.S1_s_at | HEBP1        |
| GgaAffx.11578.1.S1_s_at | KPNA2        |
| GgaAffx.11579.1.S1_s_at | SS18         |
| GgaAffx.11584.1.S1_s_at | RBM24        |
| GgaAffx.11594.1.S1_at   | RCJMB04_2n3  |
| GgaAffx.11605.1.S1_at   | C18orf22     |

|                         |              |
|-------------------------|--------------|
| GgaAffx.11609.1.S1_at   | LOC769469    |
| GgaAffx.11619.1.S1_at   | CYB5R4       |
| GgaAffx.11634.1.S1_s_at | CLINT1       |
| GgaAffx.11638.1.S1_s_at | RCJMB04_3c14 |
| GgaAffx.11647.1.S1_s_at | WDR51B       |
| GgaAffx.11649.1.S1_at   | RCJMB04_3e14 |
| GgaAffx.11650.1.S1_s_at | PCID2        |
| GgaAffx.11660.1.S1_s_at | ZNF384       |
| GgaAffx.11663.1.S1_s_at | ZNF313       |
| GgaAffx.11665.1.S1_at   | ITGA9        |
| GgaAffx.11667.1.S1_s_at | C16orf75     |
| GgaAffx.11681.1.S1_at   | PRIM2        |
| GgaAffx.11694.1.S1_at   | SFRS18       |
| GgaAffx.11699.1.S1_at   | RCJMB04_4f12 |
| GgaAffx.11702.1.S1_at   | PLEKHF2      |
| GgaAffx.11702.1.S1_s_at | PLEKHF2      |
| GgaAffx.11707.1.S1_s_at | RNUXA        |
| GgaAffx.11713.1.S1_s_at | ARHGEF3      |
| GgaAffx.11717.1.S1_at   | PGRMC2       |
| GgaAffx.11717.1.S1_s_at | PGRMC2       |
| GgaAffx.11724.1.S1_at   | RCJMB04_4k4  |
| GgaAffx.11726.1.S1_at   | RCJMB04_4k14 |
| GgaAffx.11727.1.S1_at   | LCP1         |
| GgaAffx.11729.1.S1_at   | GLT1D1       |
| GgaAffx.11738.1.S1_s_at | EGR1         |
| GgaAffx.11741.1.S1_at   | IP6K2        |
| GgaAffx.11747.1.S1_at   | SLBP         |
| GgaAffx.11754.1.S1_s_at | RCJMB04_4o21 |
| GgaAffx.11758.1.S1_s_at | RCJMB04_4p8  |
| GgaAffx.11764.1.S1_at   | RCJMB04_5a23 |
| GgaAffx.11775.1.S1_at   | IKZF5        |
| GgaAffx.11778.1.S1_s_at | ARL13B       |
| GgaAffx.11782.1.S1_s_at | CEP55        |
| GgaAffx.11787.1.S1_at   | RCJMB04_5e9  |
| GgaAffx.11787.1.S1_s_at | RCJMB04_5e9  |
| GgaAffx.11790.1.S1_at   | GUF1         |
| GgaAffx.11792.1.S1_at   | RCJMB04_3i4  |
| GgaAffx.11794.1.S1_s_at | CAPZA1       |
| GgaAffx.11795.1.S1_s_at | APIP         |
| GgaAffx.11797.1.S1_at   | SMARCE1      |

|                         |                  |
|-------------------------|------------------|
| GgaAffx.118.3.S1_s_at   | LOC419936        |
| GgaAffx.11804.1.S1_at   | TWF1             |
| GgaAffx.11805.1.S1_s_at | LOC416433        |
| GgaAffx.11811.1.S1_at   | RCJMB04_5h22     |
| GgaAffx.11816.1.S1_at   | YTHDF3           |
| GgaAffx.11823.1.S1_s_at | SLC7A6           |
| GgaAffx.11825.1.S1_s_at | CORO7 /// MAGMAS |
| GgaAffx.1183.1.S1_at    | FUT3             |
| GgaAffx.11832.1.S1_at   | P4HA2            |
| GgaAffx.11833.1.S1_s_at | GBGT1            |
| GgaAffx.11838.1.S1_at   | IFT52            |
| GgaAffx.11839.1.S1_s_at | TMEM59           |
| GgaAffx.11849.1.S1_s_at | CD36             |
| GgaAffx.11851.4.S1_at   | GPR158           |
| GgaAffx.11853.1.S1_s_at | KCNK1            |
| GgaAffx.11860.1.S1_s_at | RCJMB04_6c17     |
| GgaAffx.11862.1.S1_at   | RCJMB04_6c21     |
| GgaAffx.11865.1.S1_s_at | ACTR6            |
| GgaAffx.11872.1.S1_at   | C1orf57          |
| GgaAffx.11874.1.S1_at   | C1orf107         |
| GgaAffx.11878.1.S1_at   | SFRS5            |
| GgaAffx.11882.1.S1_at   | DDB1             |
| GgaAffx.11885.1.S1_s_at | BTK              |
| GgaAffx.11886.1.S1_s_at | GSPT1            |
| GgaAffx.11891.1.S1_at   | EIF3H            |
| GgaAffx.11893.1.S1_at   | RCJMB04_6i22     |
| GgaAffx.11897.1.S1_at   | DOLPP1           |
| GgaAffx.11898.1.S1_at   | FBXO22           |
| GgaAffx.11900.1.S1_s_at | VPS53            |
| GgaAffx.11904.1.S1_s_at | RCJMB04_6k12     |
| GgaAffx.11906.1.S1_s_at | FH               |
| GgaAffx.11911.1.S1_at   | ANKRD10          |
| GgaAffx.11913.1.S1_s_at | OSBPL2           |
| GgaAffx.11916.1.S1_s_at | MRPL50           |
| GgaAffx.11922.1.S1_at   | RCJMB04_6n13     |
| GgaAffx.11922.2.A1_at   | ST3GAL5          |
| GgaAffx.11922.2.A1_s_at | ST3GAL5          |
| GgaAffx.11926.1.S1_s_at | RCJMB04_6o7      |
| GgaAffx.11927.1.S1_at   | DDX47            |
| GgaAffx.11931.1.S1_s_at | MYO1C            |

|                         |                     |
|-------------------------|---------------------|
| GgaAffx.11934.1.S1_s_at | DHFR                |
| GgaAffx.11936.1.S1_s_at | NEURL               |
| GgaAffx.11947.1.S1_at   | PDCL3               |
| GgaAffx.11948.1.S1_s_at | GPATCH1             |
| GgaAffx.11951.1.S1_s_at | RAP1GDS1            |
| GgaAffx.11956.1.S1_at   | LIMS1 /// LOC771176 |
| GgaAffx.11957.1.S1_at   | RCJMB04_7e17        |
| GgaAffx.11959.1.S1_at   | PIK3R4              |
| GgaAffx.11959.1.S1_s_at | PIK3R4              |
| GgaAffx.11962.1.S1_s_at | PSME4               |
| GgaAffx.11965.1.S1_s_at | HSPD1 /// LOC777492 |
| GgaAffx.11969.1.S1_at   | TRIM8               |
| GgaAffx.1197.1.S1_s_at  | FAM13C1             |
| GgaAffx.11973.1.S1_s_at | LOC770547           |
| GgaAffx.11974.1.S1_at   | RCJMB04_7i6         |
| GgaAffx.11975.1.S1_s_at | PSAP                |
| GgaAffx.11981.1.S1_s_at | ACADS               |
| GgaAffx.11986.1.S1_s_at | VPS35               |
| GgaAffx.11989.1.S1_at   | STAU2               |
| GgaAffx.11992.1.S1_at   | RCJMB04_7n24        |
| GgaAffx.120.1.S1_at     | NOV                 |
| GgaAffx.1200.1.S1_at    | PHYHIPL             |
| GgaAffx.12000.1.S1_at   | SUCLG2              |
| GgaAffx.12002.1.S1_at   | ARGLU1              |
| GgaAffx.12010.1.S1_s_at | RCJMB04_8b16        |
| GgaAffx.12013.1.S1_at   | RCJMB04_1j22        |
| GgaAffx.12014.1.S1_s_at | APBB1IP             |
| GgaAffx.12023.1.S1_at   | TCF3                |
| GgaAffx.12026.1.S1_s_at | RCJMB04_8e18        |
| GgaAffx.12029.1.S1_at   | TNFRSF1B            |
| GgaAffx.12031.1.S1_at   | RCJMB04_8f10        |
| GgaAffx.12032.1.S1_s_at | ORAI1               |
| GgaAffx.12040.1.S1_at   | RCJMB04_8j10        |
| GgaAffx.12045.1.S1_s_at | C1orf69             |
| GgaAffx.12049.1.S1_at   | RCJMB04_8k11        |
| GgaAffx.12068.1.S1_s_at | RCJMB04_8n15        |
| GgaAffx.12075.1.S1_s_at | LZIC                |
| GgaAffx.12077.1.S1_at   | RCJMB04_8p20        |
| GgaAffx.1208.3.S1_s_at  | TEK                 |
| GgaAffx.12080.1.S1_s_at | DCK                 |

|                         |               |
|-------------------------|---------------|
| GgaAffx.12082.1.S1_at   | ARRDC1        |
| GgaAffx.12082.1.S1_s_at | ARRDC1        |
| GgaAffx.12086.1.S1_at   | FKBP5         |
| GgaAffx.12087.1.S1_s_at | CENPL         |
| GgaAffx.121.1.S1_at     | YTHDC2        |
| GgaAffx.1210.1.S1_at    | ROGDI         |
| GgaAffx.12102.1.S1_s_at | PMS1          |
| GgaAffx.12103.1.S1_s_at | LOC423265     |
| GgaAffx.12104.1.S1_at   | RCJMB04_9e6   |
| GgaAffx.12110.1.S1_at   | RCJMB04_9f20  |
| GgaAffx.12114.1.S1_at   | RCJMB04_9g9   |
| GgaAffx.12115.1.S1_at   | RCJMB04_9g24  |
| GgaAffx.1212.1.S1_s_at  | RCJMB04_24l12 |
| GgaAffx.12122.1.S1_s_at | LOC422214     |
| GgaAffx.12130.1.S1_s_at | C20orf11      |
| GgaAffx.12135.1.S1_at   | QDPR          |
| GgaAffx.12143.1.S1_at   | TRAPPC2       |
| GgaAffx.12143.1.S1_s_at | TRAPPC2       |
| GgaAffx.12152.1.S1_s_at | FAM53A        |
| GgaAffx.12155.1.S1_s_at | PGRMC1        |
| GgaAffx.12156.1.S1_at   | CDK9          |
| GgaAffx.12157.1.S1_at   | RCJMB04_9p17  |
| GgaAffx.12159.1.S1_s_at | ZC3H15        |
| GgaAffx.12161.1.S1_at   | TRPC4AP       |
| GgaAffx.12164.1.S1_s_at | LIG4          |
| GgaAffx.12166.1.S1_at   | RCJMB04_10b6  |
| GgaAffx.12171.1.S1_s_at | RCJMB04_10b24 |
| GgaAffx.12191.1.S1_s_at | CD200         |
| GgaAffx.12195.1.S1_s_at | YWHAH         |
| GgaAffx.12197.1.S1_at   | CLPTM1L       |
| GgaAffx.1220.1.S1_at    | RSBN1         |
| GgaAffx.12201.1.S1_at   | GLT8D3        |
| GgaAffx.12202.1.S1_at   | STX17         |
| GgaAffx.12207.1.S1_at   | CAMK2D        |
| GgaAffx.12208.1.S1_s_at | RCJMB04_10l13 |
| GgaAffx.12224.1.S1_at   | DNA2L         |
| GgaAffx.12226.1.S1_s_at | MRPL51        |
| GgaAffx.12228.1.S1_at   | RCJMB04_11b2  |
| GgaAffx.12231.1.S1_s_at | NT5C3L        |
| GgaAffx.12233.1.S1_s_at | HMG20A        |

|                         |                     |
|-------------------------|---------------------|
| GgaAffx.12237.1.S1_s_at | OGT                 |
| GgaAffx.12238.1.S1_at   | RCJMB04_11d23       |
| GgaAffx.12246.1.S1_s_at | LOC769134 /// SPAM1 |
| GgaAffx.12247.1.S1_s_at | KRR1                |
| GgaAffx.12249.1.S1_at   | USP4                |
| GgaAffx.1225.1.A1_at    | LINGO2              |
| GgaAffx.12252.1.S1_at   | RRP12               |
| GgaAffx.12253.1.S1_at   | NPL                 |
| GgaAffx.12253.1.S1_s_at | NPL                 |
| GgaAffx.12257.1.S1_s_at | LPGAT1              |
| GgaAffx.12261.1.S1_at   | NUDT1               |
| GgaAffx.12267.1.S1_at   | ATP9B               |
| GgaAffx.12270.1.S1_at   | ATP13A4             |
| GgaAffx.12271.1.S1_s_at | CRIP1               |
| GgaAffx.12272.1.S1_s_at | PCSK7               |
| GgaAffx.12275.1.S1_at   | MCM6                |
| GgaAffx.12275.1.S1_s_at | MCM6                |
| GgaAffx.12279.1.S1_s_at | SUCLA2              |
| GgaAffx.1228.2.S1_at    | KIAA1128            |
| GgaAffx.12287.1.S1_s_at | LOC416414           |
| GgaAffx.12288.1.S1_s_at | TGM4                |
| GgaAffx.12289.1.S1_at   | FAM102A             |
| GgaAffx.12290.1.S1_s_at | MVP                 |
| GgaAffx.12292.1.S1_at   | CCDC43              |
| GgaAffx.12295.1.S1_at   | SPAST               |
| GgaAffx.12297.1.S1_s_at | ARSK                |
| GgaAffx.12298.1.S1_at   | C9orf3              |
| GgaAffx.1230.1.S1_s_at  | SDF4                |
| GgaAffx.12306.1.S1_s_at | ADH5                |
| GgaAffx.12319.1.S1_at   | RCJMB04_12m23       |
| GgaAffx.12319.1.S1_s_at | RCJMB04_12m23       |
| GgaAffx.12320.1.S1_at   | STARD4              |
| GgaAffx.12322.1.S1_s_at | GORASP1             |
| GgaAffx.12323.1.S1_s_at | EVI2A               |
| GgaAffx.12336.1.S1_s_at | GOSR1               |
| GgaAffx.1234.1.S1_at    | GRID1               |
| GgaAffx.12341.1.S1_at   | RCJMB04_13e7        |
| GgaAffx.12351.1.S1_s_at | ING3                |
| GgaAffx.12356.1.S1_s_at | EXOC2               |
| GgaAffx.12357.1.S1_s_at | RHOA                |

|                         |               |
|-------------------------|---------------|
| GgaAffx.12358.1.S1_s_at | POMT1         |
| GgaAffx.12359.1.S1_at   | POLD3         |
| GgaAffx.1236.1.S1_at    | MMP24         |
| GgaAffx.12362.1.S1_at   | C1orf144      |
| GgaAffx.12367.1.S1_at   | PDIA4         |
| GgaAffx.12368.1.S1_s_at | DCTN3         |
| GgaAffx.1237.1.S1_at    | GRID1         |
| GgaAffx.12382.1.S1_s_at | TOLLIP        |
| GgaAffx.12383.1.S1_at   | EIF4A2        |
| GgaAffx.12386.1.S1_at   | RCJMB04_14b4  |
| GgaAffx.12390.1.S1_at   | RCJMB04_14c24 |
| GgaAffx.12392.1.S1_s_at | BDH1          |
| GgaAffx.12398.1.S1_s_at | RCJMB04_14f14 |
| GgaAffx.12403.1.S1_s_at | PDLIM7        |
| GgaAffx.12404.1.S1_s_at | GARNL3        |
| GgaAffx.12407.1.S1_s_at | GTF3C6        |
| GgaAffx.12409.1.S1_at   | SLC25A14      |
| GgaAffx.1241.1.S1_at    | PANK3         |
| GgaAffx.12410.1.S1_at   | FAM125A       |
| GgaAffx.12412.1.S1_at   | KIAA1609      |
| GgaAffx.12414.1.S1_s_at | HMGCR         |
| GgaAffx.12417.1.S1_at   | PQLC2         |
| GgaAffx.12418.1.S1_s_at | PCNT          |
| GgaAffx.12419.1.S1_s_at | DTL           |
| GgaAffx.12420.1.S1_at   | SHFM1         |
| GgaAffx.12420.1.S1_s_at | SHFM1         |
| GgaAffx.12426.1.S1_s_at | PLSCR1        |
| GgaAffx.12429.1.S1_at   | CECR1         |
| GgaAffx.12433.1.S1_at   | C10orf119     |
| GgaAffx.12436.1.S1_s_at | POU2AF1       |
| GgaAffx.12445.1.S1_s_at | KLHL15        |
| GgaAffx.12446.1.S1_at   | TMEM208       |
| GgaAffx.12448.1.S1_at   | RCJMB04_15m14 |
| GgaAffx.12451.1.S1_s_at | RIPK2         |
| GgaAffx.12459.1.S1_at   | LGALS8        |
| GgaAffx.12467.2.S1_s_at | CSNK1G1       |
| GgaAffx.12471.1.S1_s_at | RCJMB04_16e8  |
| GgaAffx.12473.1.S1_at   | ZFAND5        |
| GgaAffx.12478.1.S1_at   | RCJMB04_16f17 |
| GgaAffx.12479.1.S1_at   | UBAC2         |

|                         |               |
|-------------------------|---------------|
| GgaAffx.12483.1.S1_at   | SGK3          |
| GgaAffx.12489.1.S1_s_at | ERCC4         |
| GgaAffx.12490.1.S1_s_at | RCJMB04_16j10 |
| GgaAffx.12491.1.S1_s_at | DIAPH1        |
| GgaAffx.12492.1.S1_s_at | RCJMB04_16k12 |
| GgaAffx.12495.1.S1_at   | FAM96A        |
| GgaAffx.12497.1.S1_s_at | RFC3          |
| GgaAffx.125.1.S1_at     | LOC769232     |
| GgaAffx.12501.1.S1_at   | CANT1         |
| GgaAffx.12502.1.S1_s_at | SLC25A32      |
| GgaAffx.12510.1.S1_at   | DAK           |
| GgaAffx.12513.1.S1_s_at | DCTD          |
| GgaAffx.12517.1.S1_at   | NET1          |
| GgaAffx.12525.1.S1_s_at | ORC2L         |
| GgaAffx.12528.1.S1_at   | CENPO         |
| GgaAffx.12531.1.S1_at   | RCJMB04_13o20 |
| GgaAffx.12532.1.S1_at   | LCORL         |
| GgaAffx.12533.1.S1_at   | RCJMB04_17i1  |
| GgaAffx.12535.1.S1_at   | TRMT6         |
| GgaAffx.12540.1.S1_at   | CLDND1        |
| GgaAffx.12549.1.S1_at   | CCDC13        |
| GgaAffx.12551.1.S1_at   | RCJMB04_17n19 |
| GgaAffx.12553.1.S1_at   | SAMD11        |
| GgaAffx.12557.1.S1_s_at | TPST2         |
| GgaAffx.12566.1.S1_at   | SIP1          |
| GgaAffx.12568.1.S1_at   | CCDC5         |
| GgaAffx.12572.1.S1_at   | LOC422090     |
| GgaAffx.12577.1.S1_at   | AGA           |
| GgaAffx.12579.1.S1_at   | DUSP10        |
| GgaAffx.12587.1.S1_s_at | CKAP2         |
| GgaAffx.12588.1.S1_at   | RCJMB04_18m15 |
| GgaAffx.12592.1.S1_at   | SERTAD2       |
| GgaAffx.12599.1.S1_s_at | RCJMB04_19b17 |
| GgaAffx.12601.1.S1_s_at | RCJMB04_113   |
| GgaAffx.12605.1.S1_at   | RANGAP1       |
| GgaAffx.12619.1.S1_at   | ADRBK1        |
| GgaAffx.12628.1.S1_at   | LOH12CR1      |
| GgaAffx.12634.1.S1_at   | CDR2          |
| GgaAffx.12646.1.S1_at   | RCJMB04_19o18 |
| GgaAffx.12647.1.S1_at   | RCJMB04_19p13 |



|                        |               |
|------------------------|---------------|
| GgaAfx.12657.1.S1_at   | RCJMB04_20c20 |
| GgaAfx.12658.1.S1_at   | NCF4          |
| GgaAfx.12665.1.S1_s_at | RCJMB04_20e14 |
| GgaAfx.12668.1.S1_s_at | ARID5B        |
| GgaAfx.12670.1.S1_s_at | NUDT14        |
| GgaAfx.12671.1.S1_at   | EARS2         |
| GgaAfx.12672.1.S1_at   | RCJMB04_20f16 |
| GgaAfx.12678.1.S1_s_at | SFRS6         |
| GgaAfx.12680.1.S1_at   | NDUFS1        |
| GgaAfx.12686.1.S1_at   | RCJMB04_20k13 |
| GgaAfx.12691.1.S1_at   | GABPA         |
| GgaAfx.12693.1.S1_at   | RIOK2         |
| GgaAfx.12697.1.S1_s_at | RCOR3         |
| GgaAfx.12699.1.S1_s_at | RANBP1        |
| GgaAfx.12701.1.S1_at   | PLK1          |
| GgaAfx.12705.1.S1_s_at | C9orf80       |
| GgaAfx.12711.1.S1_at   | RCJMB04_21h11 |
| GgaAfx.12715.1.S1_s_at | RCJMB04_21j8  |
| GgaAfx.12720.1.S1_at   | RCJMB04_21k9  |
| GgaAfx.12722.1.S1_s_at | PYGL          |
| GgaAfx.12731.1.S1_s_at | MAGT1         |
| GgaAfx.12736.1.S1_at   | RCJMB04_22d6  |
| GgaAfx.12737.1.S1_at   | MPP1          |
| GgaAfx.12741.1.S1_at   | CTBP1         |
| GgaAfx.12743.1.S1_at   | NT5C2         |
| GgaAfx.12745.1.S1_at   | RCJMB04_22j23 |
| GgaAfx.12746.1.S1_s_at | RCJMB04_22k13 |
| GgaAfx.12752.1.S1_at   | PPP2R2D       |
| GgaAfx.12752.1.S1_s_at | PPP2R2D       |
| GgaAfx.12756.1.S1_at   | BAG3          |
| GgaAfx.12757.1.S1_s_at | RCJMB04_22n21 |
| GgaAfx.12760.1.S1_at   | DNAJB9        |
| GgaAfx.12760.1.S1_s_at | DNAJB9        |
| GgaAfx.12763.1.S1_s_at | RCJMB04_22p17 |
| GgaAfx.12766.1.S1_at   | RWDD1         |
| GgaAfx.12783.1.S1_at   | PLCXD1        |
| GgaAfx.12784.1.S1_s_at | DNM1L         |
| GgaAfx.12793.1.S1_s_at | RCJMB04_23i18 |
| GgaAfx.12794.1.S1_at   | DYRK2         |
| GgaAfx.12795.1.S1_at   | TTC7B         |

|                         |                             |
|-------------------------|-----------------------------|
| GgaAffx.12803.1.S1_s_at | LARP7                       |
| GgaAffx.12806.1.S1_at   | WDR68                       |
| GgaAffx.12809.1.S1_s_at | SUGT1                       |
| GgaAffx.1281.1.S1_s_at  | HIPK1                       |
| GgaAffx.12812.1.S1_s_at | RCJMB04_23o11               |
| GgaAffx.12813.1.S1_at   | HEATR3                      |
| GgaAffx.12815.1.S1_at   | C20orf108                   |
| GgaAffx.12816.1.S1_at   | TMEM128                     |
| GgaAffx.12827.1.S1_at   | BRP44L                      |
| GgaAffx.12828.1.S1_at   | KIAA1704                    |
| GgaAffx.12833.1.S1_s_at | RCJMB04_24e12               |
| GgaAffx.12834.1.S1_at   | HNRPK                       |
| GgaAffx.12836.1.S1_at   | PTP4A1                      |
| GgaAffx.12837.1.S1_at   | LAS1L                       |
| GgaAffx.12838.1.S1_s_at | LOC772123 /// RCJMB04_24f23 |
| GgaAffx.12839.1.S1_at   | RCJMB04_24g5                |
| GgaAffx.12842.1.S1_s_at | IRG1                        |
| GgaAffx.12846.1.S1_at   | TOR1A                       |
| GgaAffx.12848.1.S1_at   | LRPPRC                      |
| GgaAffx.12851.1.S1_s_at | C3AR1                       |
| GgaAffx.12855.1.S1_s_at | TSEN2                       |
| GgaAffx.1286.1.S1_at    | RFT1                        |
| GgaAffx.12865.1.S1_at   | PLDN                        |
| GgaAffx.12869.1.S1_at   | RCJMB04_25c5                |
| GgaAffx.12870.1.S1_at   | TTC7A                       |
| GgaAffx.12871.1.S1_s_at | TMEM41B                     |
| GgaAffx.12873.1.S1_at   | RCJMB04_25e3                |
| GgaAffx.12879.1.S1_s_at | MAPK11                      |
| GgaAffx.1288.1.S1_at    | RSPO1                       |
| GgaAffx.12880.1.S1_s_at | RCJMB04_25f22               |
| GgaAffx.12888.1.S1_s_at | MIB2                        |
| GgaAffx.12890.1.S1_s_at | TRIM39                      |
| GgaAffx.12892.1.S1_at   | CTSA                        |
| GgaAffx.12894.1.S1_at   | NKAP                        |
| GgaAffx.12895.1.S1_at   | RCJMB04_25m4                |
| GgaAffx.12897.1.S1_at   | BUD13                       |
| GgaAffx.12914.1.S1_at   | SLC30A6                     |
| GgaAffx.12920.1.S1_at   | RCJMB04_26g6                |
| GgaAffx.12920.1.S1_s_at | RCJMB04_26g6                |
| GgaAffx.12921.1.S1_at   | RCJMB04_26g24               |

|                          |               |
|--------------------------|---------------|
| GgaAffx.12931.1.S1_s_at  | ZMAT2         |
| GgaAffx.12932.1.S1_s_at  | TSPAN12       |
| GgaAffx.12934.1.S1_at    | C4orf20       |
| GgaAffx.12935.1.S1_s_at  | DHCR24        |
| GgaAffx.12938.10.S1_at   | HDX           |
| GgaAffx.12938.14.S1_s_at | RCJMB04_11e10 |
| GgaAffx.12938.8.S1_s_at  | UBN1          |
| GgaAffx.12940.1.S1_at    | ASB3          |
| GgaAffx.12943.1.S1_at    | CHST10        |
| GgaAffx.12948.1.S1_s_at  | RASGRP3       |
| GgaAffx.1295.1.S1_s_at   | ITCH          |
| GgaAffx.12950.1.S1_at    | BHLHB4        |
| GgaAffx.12951.1.S1_at    | NT5C3         |
| GgaAffx.12953.1.S1_at    | SIRT2         |
| GgaAffx.12960.1.S1_at    | RCJMB04_27p10 |
| GgaAffx.12964.1.S1_s_at  | LSS           |
| GgaAffx.12967.1.S1_s_at  | HSP90AA1      |
| GgaAffx.12969.1.S1_at    | PIK3R5        |
| GgaAffx.1297.1.S1_at     | C1orf59       |
| GgaAffx.12973.1.S1_at    | ZNF767        |
| GgaAffx.12977.1.S1_s_at  | SDF2L1        |
| GgaAffx.12979.1.S1_s_at  | TAPBPL        |
| GgaAffx.12983.1.S1_at    | RCJMB04_28l23 |
| GgaAffx.12983.1.S1_s_at  | RCJMB04_28l23 |
| GgaAffx.12984.1.S1_s_at  | SNX3          |
| GgaAffx.12989.1.S1_at    | TTC14         |
| GgaAffx.12990.1.S1_s_at  | SPATA2        |
| GgaAffx.12999.1.S1_s_at  | TEC           |
| GgaAffx.13001.1.S1_s_at  | NAP1L4        |
| GgaAffx.13005.1.S1_at    | P2RY8         |
| GgaAffx.13008.1.S1_at    | KLF6          |
| GgaAffx.13009.1.S1_at    | TNFAIP8       |
| GgaAffx.13010.1.S1_at    | NUF2          |
| GgaAffx.13015.1.S1_at    | RCJMB04_29l7  |
| GgaAffx.13018.1.S1_at    | MRPL37        |
| GgaAffx.1302.1.S1_at     | SYT6          |
| GgaAffx.13028.1.S1_at    | LOC419659     |
| GgaAffx.13032.1.S1_s_at  | KIF23         |
| GgaAffx.13043.1.S1_s_at  | C22orf25      |
| GgaAffx.13047.1.S1_s_at  | GTDC1         |

|                         |               |
|-------------------------|---------------|
| GgaAffx.13048.1.S1_at   | PLS3          |
| GgaAffx.13049.1.S1_at   | WDFY1         |
| GgaAffx.1305.1.S1_at    | UBE2O         |
| GgaAffx.13053.1.S1_s_at | C10orf58      |
| GgaAffx.13054.1.S1_at   | KLHL7         |
| GgaAffx.13055.1.S1_at   | FBXO8         |
| GgaAffx.13056.1.S1_at   | RCJMB04_30p22 |
| GgaAffx.13057.1.S1_s_at | RCJMB04_31a4  |
| GgaAffx.13065.1.S1_s_at | RCJMB04_31e20 |
| GgaAffx.13067.1.S1_s_at | SLC39A13      |
| GgaAffx.13073.1.S1_at   | RCJMB04_31h10 |
| GgaAffx.13075.1.S1_at   | LOC421792     |
| GgaAffx.1308.2.S1_s_at  | TRIM33        |
| GgaAffx.13080.1.S1_at   | YPEL2         |
| GgaAffx.13081.1.S1_s_at | SNAPC5        |
| GgaAffx.13085.1.S1_at   | RCJMB04_31m22 |
| GgaAffx.13088.1.S1_at   | RCJMB04_31o3  |
| GgaAffx.13091.2.S1_s_at | TMEM123       |
| GgaAffx.13098.1.S1_at   | FYB           |
| GgaAffx.13102.1.S1_s_at | STUB1         |
| GgaAffx.13104.1.S1_at   | PPP1R16B      |
| GgaAffx.13105.1.S1_at   | RCJMB04_32c9  |
| GgaAffx.13109.1.S1_at   | CCDC34        |
| GgaAffx.13113.1.S1_at   | WDR36         |
| GgaAffx.13118.1.S1_s_at | LRRC28        |
| GgaAffx.13119.1.S1_s_at | RPS14         |
| GgaAffx.13122.1.S1_at   | PSMA2         |
| GgaAffx.13126.1.S1_at   | C15orf23      |
| GgaAffx.13127.1.S1_s_at | FUBP1         |
| GgaAffx.13129.1.S1_at   | RMI1          |
| GgaAffx.13130.1.S1_s_at | C13orf1       |
| GgaAffx.13131.1.S1_s_at | GRPEL1        |
| GgaAffx.13136.1.S1_at   | RAB33B        |
| GgaAffx.13138.1.S1_at   | TNFSF13B      |
| GgaAffx.13139.1.S1_s_at | CTNNBL1       |
| GgaAffx.13140.1.S1_at   | LOC424678     |
| GgaAffx.13142.1.S1_at   | LOC424067     |
| GgaAffx.13151.1.S1_at   | FUT8          |
| GgaAffx.13154.1.S1_s_at | CRYZ          |
| GgaAffx.13155.1.S1_s_at | SNX5          |

|                         |               |
|-------------------------|---------------|
| GgaAffx.13170.1.S1_s_at | RCJMB04_33p3  |
| GgaAffx.1318.1.S1_at    | PRUNE         |
| GgaAffx.13180.1.S1_s_at | MTAP          |
| GgaAffx.13184.1.S1_at   | RCJMB04_34i9  |
| GgaAffx.13195.1.S1_at   | C6orf130      |
| GgaAffx.13197.1.S1_s_at | PAPOLA        |
| GgaAffx.13205.1.S1_s_at | IGHMBP2       |
| GgaAffx.13210.1.S1_at   | SLA           |
| GgaAffx.13211.1.S1_s_at | RCJMB04_35f9  |
| GgaAffx.13213.1.S1_at   | RCJMB04_35g11 |
| GgaAffx.13216.1.S1_s_at | NFKBIZ        |
| GgaAffx.13218.1.S1_s_at | OXCT1         |
| GgaAffx.13221.1.S1_s_at | MTPN          |
| GgaAffx.13225.1.S1_at   | RCJMB04_36h7  |
| GgaAffx.13227.1.S1_s_at | ATP6V0D2      |
| GgaAffx.13232.1.S1_at   | KLHDC10       |
| GgaAffx.13238.1.S1_s_at | GLCCI1        |
| GgaAffx.13241.1.S1_at   | SLC16A1       |
| GgaAffx.1328.2.S1_at    | STXBP3        |
| GgaAffx.1329.1.S1_at    | SENP8         |
| GgaAffx.1340.2.S1_s_at  | PRKCD         |
| GgaAffx.1342.1.S1_at    | ZC3H12A       |
| GgaAffx.1348.1.A1_at    | PFKFB4        |
| GgaAffx.1350.2.S1_s_at  | RCJMB04_25b17 |
| GgaAffx.1355.1.S1_at    | RALY          |
| GgaAffx.1366.3.S1_at    | ALG1          |
| GgaAffx.1369.1.S1_at    | AMPD1         |
| GgaAffx.1375.1.S1_s_at  | DOCK2         |
| GgaAffx.1388.1.S1_at    | LOC415325     |
| GgaAffx.1389.1.S1_at    | FOXI1         |
| GgaAffx.1393.4.S1_s_at  | CLCC1         |
| GgaAffx.1396.1.S1_s_at  | EVPL          |
| GgaAffx.1400.1.S1_at    | PARG          |
| GgaAffx.1402.1.S1_s_at  | C16orf62      |
| GgaAffx.1411.1.S1_s_at  | WDR47         |
| GgaAffx.1423.1.S1_at    | KIAA0692      |
| GgaAffx.1424.1.S1_at    | CAMSAP1L1     |
| GgaAffx.1428.1.S1_at    | GABRP         |
| GgaAffx.1440.5.S1_s_at  | LOC430487     |
| GgaAffx.1442.1.S1_at    | LOC415327     |

|                        |                       |
|------------------------|-----------------------|
| GgaAffx.1443.1.S1_at   | TUSC4                 |
| GgaAffx.1448.1.S1_at   | LOC415671             |
| GgaAffx.1454.1.S1_at   | GALT                  |
| GgaAffx.1463.1.S1_s_at | FHOD1                 |
| GgaAffx.1463.3.S1_s_at | FHOD1                 |
| GgaAffx.1473.1.S1_s_at | CD6                   |
| GgaAffx.1473.2.S1_s_at | CD6                   |
| GgaAffx.1482.2.S1_s_at | RFFL                  |
| GgaAffx.1483.1.A1_s_at | UBN1                  |
| GgaAffx.1484.1.S1_at   | DMXL1                 |
| GgaAffx.1485.1.S1_at   | UNC13D                |
| GgaAffx.1486.1.S1_at   | LOC415913             |
| GgaAffx.1489.1.S1_at   | GALNT9                |
| GgaAffx.15.1.S1_at     | CUZD1                 |
| GgaAffx.1501.3.S1_s_at | EIF2C1                |
| GgaAffx.1515.4.S1_s_at | OGDHL                 |
| GgaAffx.1515.7.S1_at   | OGDHL                 |
| GgaAffx.1521.2.S1_s_at | UNK                   |
| GgaAffx.1523.1.S1_s_at | CSNK1G1               |
| GgaAffx.1524.1.S1_s_at | CSNK1G1 /// LOC769181 |
| GgaAffx.153.1.S1_s_at  | SLC25A46              |
| GgaAffx.1544.1.S1_s_at | COMMD10               |
| GgaAffx.1548.1.S1_at   | LOC431649             |
| GgaAffx.1553.1.S1_at   | NRG3                  |
| GgaAffx.1565.1.S1_s_at | DNAH3                 |
| GgaAffx.1579.2.S1_at   | F13B                  |
| GgaAffx.1579.4.S1_s_at | F13B                  |
| GgaAffx.1592.1.S1_at   | KIAA0258              |
| GgaAffx.1607.1.S1_at   | EGFL7                 |
| GgaAffx.1613.1.S1_at   | RCJMB04_5p1           |
| GgaAffx.1625.1.S1_s_at | CFH                   |
| GgaAffx.1625.4.S1_s_at | CFH                   |
| GgaAffx.1637.1.S1_s_at | WDR24                 |
| GgaAffx.1642.2.S1_s_at | AQP7                  |
| GgaAffx.1642.3.S1_at   | AQP7                  |
| GgaAffx.1645.4.S1_s_at | DUOXA1                |
| GgaAffx.1647.1.S1_s_at | VAC14                 |
| GgaAffx.1650.1.S1_s_at | WDR75                 |
| GgaAffx.1657.1.S1_s_at | UQCRC2                |
| GgaAffx.1660.2.S1_s_at | ZMYM4                 |

|                        |                      |
|------------------------|----------------------|
| GgaAffx.1677.1.S1_at   | RGS13                |
| GgaAffx.1678.1.S1_at   | OR10A4               |
| GgaAffx.1696.1.S1_at   | LOC770019            |
| GgaAffx.17.1.S1_at     | LOC427084            |
| GgaAffx.1707.1.S1_s_at | CSMD2                |
| GgaAffx.1708.1.S1_at   | GGPS1                |
| GgaAffx.1710.2.S1_at   | ADCY10 /// LOC770187 |
| GgaAffx.1710.3.S1_at   | ADCY10               |
| GgaAffx.1720.1.S1_at   | RXRA                 |
| GgaAffx.1722.1.S1_at   | NMNAT1               |
| GgaAffx.1734.1.S1_s_at | KIAA1946             |
| GgaAffx.1741.1.S1_at   | PCYOX1L              |
| GgaAffx.1743.1.S1_s_at | RCJMB04_4k4          |
| GgaAffx.1746.1.S1_s_at | RCJMB04_4k4          |
| GgaAffx.1752.2.S1_at   | TCP11                |
| GgaAffx.1752.2.S1_s_at | TCP11                |
| GgaAffx.1756.2.S1_s_at | SLC15A4              |
| GgaAffx.176.1.S1_at    | LOC429468            |
| GgaAffx.1777.1.S1_at   | UAP1                 |
| GgaAffx.1781.1.S1_at   | XPO6                 |
| GgaAffx.1782.1.S1_at   | CCDC57               |
| GgaAffx.1788.2.S1_s_at | PCDH15               |
| GgaAffx.1789.1.S1_at   | PCDH15               |
| GgaAffx.179.1.S1_at    | PCNX                 |
| GgaAffx.1791.1.S1_at   | PCDH15               |
| GgaAffx.1795.1.S1_at   | TFDP2                |
| GgaAffx.1795.3.S1_s_at | TFDP2                |
| GgaAffx.1799.1.S1_at   | PCDH15               |
| GgaAffx.1813.1.S1_at   | C2orf21              |
| GgaAffx.1814.1.S1_at   | GRK7                 |
| GgaAffx.1816.1.S1_at   | PACSIN1              |
| GgaAffx.1834.1.S1_at   | LOC770794            |
| GgaAffx.1841.1.S1_at   | ZBTB38               |
| GgaAffx.1852.2.S1_s_at | ENPP1                |
| GgaAffx.1857.1.S1_s_at | AACS                 |
| GgaAffx.1872.2.S1_s_at | AOC3 /// PSME3       |
| GgaAffx.1880.1.S1_at   | MST1R                |
| GgaAffx.1883.3.S1_s_at | ADAMTSL2             |
| GgaAffx.1910.1.S1_at   | WDR69                |
| GgaAffx.1932.1.S1_at   | LOC420114            |

|                        |                            |
|------------------------|----------------------------|
| GgaAfx.1939.1.S1_at    | RHOBTB1                    |
| GgaAfx.1945.1.S1_s_at  | EXOSC10                    |
| GgaAfx.1950.1.S1_at    | CBFA2T2                    |
| GgaAfx.1956.1.S1_at    | ANKFN1                     |
| GgaAfx.1960.1.S1_at    | RGS14                      |
| GgaAfx.1974.1.S1_at    | ANK3                       |
| GgaAfx.198.1.S1_at     | SLC9A2                     |
| GgaAfx.1984.1.S1_s_at  | ZC3H7A                     |
| GgaAfx.199.1.S1_at     | PIGV                       |
| GgaAfx.1997.1.S1_at    | LASS1                      |
| GgaAfx.2005.1.S1_s_at  | LOC768480 /// RCJMB04_15m4 |
| GgaAfx.20083.1.S1_at   | HOXA6                      |
| GgaAfx.20085.1.S1_s_at | SOX5                       |
| GgaAfx.20094.1.S1_s_at | AXIN1                      |
| GgaAfx.20099.1.S1_at   | HSP25                      |
| GgaAfx.20100.1.S1_at   | CPT1A                      |
| GgaAfx.20103.1.S1_s_at | GDF9                       |
| GgaAfx.20104.1.S1_s_at | POSTN                      |
| GgaAfx.20105.1.S1_s_at | TRPC1                      |
| GgaAfx.20120.1.S1_s_at | PRKCB                      |
| GgaAfx.20127.1.S1_s_at | RCJMB04_5a10               |
| GgaAfx.20135.1.S1_s_at | STAT3                      |
| GgaAfx.20140.1.S1_at   | DLX6                       |
| GgaAfx.20141.1.S1_at   | OTX2                       |
| GgaAfx.20143.1.S1_s_at | PCDHGA2                    |
| GgaAfx.20153.1.S1_at   | CPNE8                      |
| GgaAfx.20158.1.S1_s_at | DSCR3                      |
| GgaAfx.2017.1.S1_s_at  | C16orf70                   |
| GgaAfx.20175.1.S1_at   | LRRC28                     |
| GgaAfx.2019.1.S1_at    | LOC770649                  |
| GgaAfx.20192.1.S1_s_at | P4HB                       |
| GgaAfx.20193.1.S1_at   | DYNC2LI1                   |
| GgaAfx.20194.1.S1_at   | MADD                       |
| GgaAfx.20196.1.S1_at   | DNMBP                      |
| GgaAfx.20199.1.S1_s_at | RQCD1                      |
| GgaAfx.20207.1.S1_s_at | PAPD1                      |
| GgaAfx.20209.1.S1_at   | ZNRF2                      |
| GgaAfx.20217.1.S1_at   | LOC418900                  |
| GgaAfx.20219.1.S1_at   | LOC422903                  |
| GgaAfx.20220.1.S1_at   | HTR2C                      |



|                         |               |
|-------------------------|---------------|
| GgaAffx.20222.1.S1_s_at | NHLRC2        |
| GgaAffx.20236.1.S1_at   | ERCC4         |
| GgaAffx.20237.1.S1_s_at | MYCT1         |
| GgaAffx.20238.1.S1_at   | PRPSAP1       |
| GgaAffx.20240.1.S1_at   | RBM33         |
| GgaAffx.20244.1.S1_at   | FCHSD2        |
| GgaAffx.20245.1.S1_s_at | RAB4A         |
| GgaAffx.20254.1.S1_at   | AMN1          |
| GgaAffx.20255.1.S1_at   | PARP4         |
| GgaAffx.20263.1.S1_s_at | RBM33         |
| GgaAffx.20275.1.S1_s_at | ALCAM         |
| GgaAffx.20283.1.S1_at   | LOC417551     |
| GgaAffx.20284.1.S1_s_at | LOC424965     |
| GgaAffx.20294.1.S1_at   | NAALAD2       |
| GgaAffx.20295.1.S1_at   | NUAK1         |
| GgaAffx.20307.1.S1_s_at | HIF1A         |
| GgaAffx.20312.1.S1_at   | RPS6KC1       |
| GgaAffx.20316.1.S1_at   | COL4A5        |
| GgaAffx.20317.1.S1_at   | LOC425455     |
| GgaAffx.20327.1.S1_s_at | ZBTB25        |
| GgaAffx.20330.1.S1_at   | KIAA0802      |
| GgaAffx.20334.1.S1_at   | RCJMB04_18a15 |
| GgaAffx.20347.1.S1_at   | IGSF10        |
| GgaAffx.2035.2.S1_s_at  | RAB11FIP4     |
| GgaAffx.2036.1.S1_at    | C6orf130      |
| GgaAffx.20364.1.S1_at   | AGPAT6        |
| GgaAffx.2037.1.S1_at    | COL16A1       |
| GgaAffx.20371.1.S1_s_at | PTPRS         |
| GgaAffx.20388.1.S1_at   | GTF3C2        |
| GgaAffx.20394.1.S1_at   | LOC427178     |
| GgaAffx.20395.1.S1_at   | LOC768386     |
| GgaAffx.204.1.S1_s_at   | RCJMB04_10b6  |
| GgaAffx.20413.1.S1_at   | WHSC1         |
| GgaAffx.20416.1.S1_at   | PDP2          |
| GgaAffx.20420.1.S1_s_at | N4BP2L1       |
| GgaAffx.2043.1.S1_at    | RAD54L2       |
| GgaAffx.20431.1.S1_at   | RAB27A        |
| GgaAffx.20433.1.S1_at   | RCJMB04_10b24 |
| GgaAffx.20434.1.S1_s_at | TTC13         |
| GgaAffx.20442.1.S1_s_at | C9orf41       |

|                        |              |
|------------------------|--------------|
| GgaAfx.20446.1.S1_s_at | MPP3         |
| GgaAfx.20448.1.S1_s_at | KIAA0430     |
| GgaAfx.20456.1.S1_s_at | LOC420939    |
| GgaAfx.20459.1.S1_at   | SLC30A1      |
| GgaAfx.20471.2.A1_at   | LOC423879    |
| GgaAfx.20486.1.S1_at   | EXPH5        |
| GgaAfx.20495.1.S1_s_at | ZC3H6        |
| GgaAfx.20499.1.S1_at   | C12orf10     |
| GgaAfx.20499.1.S1_s_at | C12orf10     |
| GgaAfx.20510.2.S1_s_at | C14orf43     |
| GgaAfx.20519.1.S1_at   | LOC417130    |
| GgaAfx.20520.1.S1_at   | HCFC2        |
| GgaAfx.20528.1.S1_at   | PROS1        |
| GgaAfx.20533.1.S1_s_at | RFC1         |
| GgaAfx.20534.1.S1_s_at | ATPBD4       |
| GgaAfx.20541.1.S1_at   | MAP7         |
| GgaAfx.20553.1.S1_s_at | LOC430880    |
| GgaAfx.20558.1.S1_at   | CHD1         |
| GgaAfx.20565.1.S1_s_at | YPEL2        |
| GgaAfx.20566.1.S1_s_at | WDFY3        |
| GgaAfx.20568.1.S1_s_at | MAP7         |
| GgaAfx.20579.1.S1_s_at | NOL5A        |
| GgaAfx.20602.1.S1_at   | ZC3HAV1      |
| GgaAfx.20606.1.S1_s_at | TACC2        |
| GgaAfx.2061.1.S1_at    | ATAD5        |
| GgaAfx.20612.1.S1_s_at | RCJMB04_8l16 |
| GgaAfx.20613.1.S1_at   | LSM8         |
| GgaAfx.20640.1.S1_at   | TIMD4        |
| GgaAfx.20642.1.S1_s_at | HN1          |
| GgaAfx.20643.1.S1_at   | OLFML2B      |
| GgaAfx.20644.1.S1_at   | FAM107B      |
| GgaAfx.20662.1.S1_at   | NARF         |
| GgaAfx.20663.1.S1_at   | ZFAT1        |
| GgaAfx.20669.1.S1_s_at | PACS2        |
| GgaAfx.2067.1.S1_at    | MBTPS1       |
| GgaAfx.20680.1.S1_s_at | SCN2A        |
| GgaAfx.20683.1.S1_at   | LOC424118    |
| GgaAfx.20687.1.S1_s_at | CCDC52       |
| GgaAfx.20689.1.S1_at   | SPI1         |
| GgaAfx.20694.1.S1_s_at | ORMDL1       |

|                         |               |
|-------------------------|---------------|
| GgaAffx.20696.1.S1_s_at | DCX           |
| GgaAffx.20700.1.S1_s_at | RCJMB04_10m24 |
| GgaAffx.20709.1.S1_s_at | BTBD1         |
| GgaAffx.20710.1.S1_s_at | MRRF          |
| GgaAffx.20711.1.S1_s_at | MPRIP         |
| GgaAffx.2072.2.S1_at    | LOC419652     |
| GgaAffx.20721.1.S1_s_at | RCJMB04_17o18 |
| GgaAffx.20722.1.S1_at   | TRIO          |
| GgaAffx.20727.1.S1_at   | LOC425590     |
| GgaAffx.2073.1.S1_at    | CENTA2        |
| GgaAffx.20735.1.S1_s_at | ZNF706        |
| GgaAffx.20737.1.S1_at   | LOC424265     |
| GgaAffx.20748.1.S1_s_at | MTO1          |
| GgaAffx.2075.1.S1_at    | SETD8         |
| GgaAffx.20753.1.S1_s_at | TMEM119       |
| GgaAffx.20757.1.S1_s_at | TNS1          |
| GgaAffx.20758.1.S1_s_at | ACTL6A        |
| GgaAffx.20762.1.S1_at   | LOC396152     |
| GgaAffx.20765.1.S1_at   | SLC45A4       |
| GgaAffx.2078.1.S1_at    | KLHL26        |
| GgaAffx.20782.1.S1_s_at | RCJMB04_4i6   |
| GgaAffx.20784.1.S1_at   | WWC3          |
| GgaAffx.20789.1.A1_at   | RPLP1         |
| GgaAffx.20789.1.S1_at   | RPLP1         |
| GgaAffx.20793.1.S1_at   | C9orf96       |
| GgaAffx.20797.1.S1_at   | HECW1         |
| GgaAffx.2082.1.S1_at    | FRAP1         |
| GgaAffx.20830.1.S1_s_at | FBXL20        |
| GgaAffx.20831.1.S1_at   | MTMR7         |
| GgaAffx.20833.1.S1_s_at | APEH          |
| GgaAffx.20845.1.S1_at   | ABCB10        |
| GgaAffx.20851.1.S1_at   | CDC5L         |
| GgaAffx.20857.1.S1_s_at | ATF7IP        |
| GgaAffx.20877.1.S1_at   | SOX7          |
| GgaAffx.2089.1.S1_at    | NOP16         |
| GgaAffx.20895.1.S1_at   | LOC423478     |
| GgaAffx.209.2.S1_s_at   | PPP1R12B      |
| GgaAffx.209.3.S1_at     | PPP1R12B      |
| GgaAffx.20900.1.S1_s_at | TXNDC10       |
| GgaAffx.20902.1.S1_at   | LOC776722     |

|                         |               |
|-------------------------|---------------|
| GgaAffx.20916.1.S1_at   | SLC29A3       |
| GgaAffx.20926.1.S1_s_at | ZADH2         |
| GgaAffx.20932.1.S1_s_at | ZNF511        |
| GgaAffx.20937.1.S1_at   | PDS5B         |
| GgaAffx.20941.1.S1_s_at | DGKD          |
| GgaAffx.20947.1.S1_at   | N4BP2         |
| GgaAffx.20947.1.S1_s_at | N4BP2         |
| GgaAffx.20948.1.S1_at   | LOC415416     |
| GgaAffx.20955.1.S1_at   | LOC423046     |
| GgaAffx.20956.1.S1_at   | TTC39A        |
| GgaAffx.20977.1.S1_s_at | MACF1         |
| GgaAffx.20978.1.S1_s_at | FGFR2         |
| GgaAffx.20980.1.S1_at   | GRIA3         |
| GgaAffx.20984.1.S1_at   | BRP44L        |
| GgaAffx.20998.1.S1_at   | PASK          |
| GgaAffx.20998.1.S1_s_at | PASK          |
| GgaAffx.21002.1.S1_s_at | RCJMB04_31g18 |
| GgaAffx.21006.1.S1_s_at | GRK6          |
| GgaAffx.21013.1.S1_s_at | POM121        |
| GgaAffx.21014.1.S1_at   | RELL1         |
| GgaAffx.21017.1.S1_s_at | CALD1         |
| GgaAffx.21019.1.S1_at   | WDR76         |
| GgaAffx.21020.1.S1_s_at | BAZ1B         |
| GgaAffx.21022.1.S1_s_at | FAM44B        |
| GgaAffx.21033.1.S1_at   | BCL9          |
| GgaAffx.21042.1.S1_s_at | TOB2          |
| GgaAffx.21044.1.S1_at   | DACT2         |
| GgaAffx.21044.1.S1_s_at | DACT2         |
| GgaAffx.21046.1.S1_s_at | TSR1          |
| GgaAffx.21048.1.S1_s_at | DDEF1         |
| GgaAffx.2105.1.S1_s_at  | HERC1         |
| GgaAffx.21050.1.S1_at   | PORCN         |
| GgaAffx.21050.1.S1_s_at | PORCN         |
| GgaAffx.21053.1.S1_at   | BCOR          |
| GgaAffx.21073.1.S1_at   | RCJMB04_1j12  |
| GgaAffx.21075.1.S1_at   | CABIN1        |
| GgaAffx.21092.1.S1_s_at | NUP35         |
| GgaAffx.21099.1.S1_at   | TBC1D23       |
| GgaAffx.2110.2.S1_s_at  | ADAM9         |
| GgaAffx.21102.1.S1_s_at | ALDOB         |

|                         |                     |       |
|-------------------------|---------------------|-------|
| GgaAffx.21116.1.S1_s_at | OSGIN1              |       |
| GgaAffx.21118.1.S1_at   | MAP1A               |       |
| GgaAffx.21118.1.S1_s_at | LOC770402 /// MAP1A |       |
| GgaAffx.21123.1.S1_s_at | CTSB                |       |
| GgaAffx.2113.1.S1_s_at  | CDK2AP1             |       |
| GgaAffx.21135.1.S1_s_at | FGD3                |       |
| GgaAffx.2114.1.S1_at    | RCJMB04_37h11       |       |
| GgaAffx.21140.1.S1_at   | TTLL12              |       |
| GgaAffx.21140.1.S1_s_at | TTLL12              |       |
| GgaAffx.21171.1.S1_s_at | BTG2                |       |
| GgaAffx.21175.1.S1_at   | LOC426324           |       |
| GgaAffx.21182.1.S1_at   | ZNF592              |       |
| GgaAffx.21188.1.S1_at   | RBKS                |       |
| GgaAffx.21190.1.S1_s_at | WDR73               |       |
| GgaAffx.21210.1.S1_s_at | RCJMB04_113         |       |
| GgaAffx.21211.1.S1_s_at | VPS4B               |       |
| GgaAffx.21218.1.S1_s_at | FKRP                |       |
| GgaAffx.2122.1.S1_at    | MPHOSPH9            |       |
| GgaAffx.21223.1.S1_at   |                     | 40979 |
| GgaAffx.21225.1.S1_at   | SMARCD3             |       |
| GgaAffx.21241.1.S1_s_at | GAL3ST1             |       |
| GgaAffx.21243.1.S1_s_at | PHLPP               |       |
| GgaAffx.21244.1.S1_at   | WDR31               |       |
| GgaAffx.21246.1.S1_at   | GUCY1A2             |       |
| GgaAffx.21250.1.S1_s_at | C9orf58             |       |
| GgaAffx.21260.1.S1_at   | TRPM2               |       |
| GgaAffx.21278.1.S1_at   | RCJMB04_3a6         |       |
| GgaAffx.21280.1.S1_at   | APBA1               |       |
| GgaAffx.21285.1.S1_at   | PLA2G10             |       |
| GgaAffx.21297.1.S1_s_at | ANKRD13C            |       |
| GgaAffx.21303.1.S1_at   | CPNE4               |       |
| GgaAffx.21306.1.S1_s_at | LOC772356           |       |
| GgaAffx.21308.1.S1_at   | DCBLD1              |       |
| GgaAffx.21308.1.S1_s_at | DCBLD1              |       |
| GgaAffx.21318.1.S1_at   | LOC771033           |       |
| GgaAffx.21318.1.S1_s_at | LOC771033           |       |
| GgaAffx.21321.1.S1_at   | ARHGAP5             |       |
| GgaAffx.21323.1.S1_at   | KIAA1797            |       |
| GgaAffx.21327.1.S1_at   | CORO2A              |       |
| GgaAffx.21344.1.S1_at   | LOC421235           |       |

|                        |               |
|------------------------|---------------|
| GgaAfx.21349.1.S1_at   | NIPA1         |
| GgaAfx.21349.1.S1_s_at | NIPA1         |
| GgaAfx.21351.1.S1_s_at | CA4           |
| GgaAfx.21354.1.S1_at   | YPEL1         |
| GgaAfx.21358.1.S1_s_at | SAMHD1        |
| GgaAfx.21360.1.S1_at   | WDR34         |
| GgaAfx.21365.1.S1_s_at | ABHD12        |
| GgaAfx.21367.1.S1_at   | CTCF          |
| GgaAfx.21369.1.S1_at   | RCJMB04_26e18 |
| GgaAfx.21370.1.S1_s_at | FBXO11        |
| GgaAfx.21371.1.S1_s_at | LOC415444     |
| GgaAfx.21377.1.S1_s_at | PPT1          |
| GgaAfx.21378.1.S1_at   | ABCC6         |
| GgaAfx.21381.2.S1_s_at | COX10         |
| GgaAfx.21386.1.S1_s_at | CALD1         |
| GgaAfx.21388.1.S1_at   | LOC769096     |
| GgaAfx.21393.1.S1_s_at | SLC25A13      |
| GgaAfx.21401.1.S1_at   | C5orf35       |
| GgaAfx.21405.1.S1_s_at | LYCAT         |
| GgaAfx.21410.1.S1_s_at | UBE3B         |
| GgaAfx.21415.1.S1_at   | LOC422177     |
| GgaAfx.21416.1.S1_at   | ZC3H12D       |
| GgaAfx.21418.1.S1_at   | RCJMB04_20e15 |
| GgaAfx.2142.1.S1_at    | ADAM8         |
| GgaAfx.21430.1.S1_at   | C4orf29       |
| GgaAfx.21431.1.S1_at   | TECPR1        |
| GgaAfx.21432.1.S1_s_at | LOC421802     |
| GgaAfx.21433.1.S1_s_at | STK25         |
| GgaAfx.21452.2.S1_s_at | MESDC1        |
| GgaAfx.21456.1.S1_at   | NOLA1         |
| GgaAfx.21460.1.S1_at   | YBX1          |
| GgaAfx.21469.1.S1_s_at | FNBP1         |
| GgaAfx.21471.1.S1_s_at | LOC769726     |
| GgaAfx.21477.1.S1_s_at | LOC777054     |
| GgaAfx.21487.1.S1_s_at | FXR1          |
| GgaAfx.2149.4.S1_s_at  | ADAM32        |
| GgaAfx.21491.1.S1_s_at | BZRAP1        |
| GgaAfx.21493.1.S1_s_at | PHF20L1       |
| GgaAfx.21494.1.S1_at   | KIAA0774      |
| GgaAfx.2150.1.S1_at    | FRS3          |

|                         |               |
|-------------------------|---------------|
| GgaAffx.21502.1.S1_at   | B3GNT5        |
| GgaAffx.21514.1.S1_at   | GPBP1         |
| GgaAffx.21519.1.S1_s_at | DD1           |
| GgaAffx.21523.1.S1_s_at | HIVEP2        |
| GgaAffx.21526.1.S1_at   | MYEOV2        |
| GgaAffx.21531.1.S1_at   | PLA2G12A      |
| GgaAffx.21538.1.S1_at   | RASL10B       |
| GgaAffx.2154.1.S1_at    | PTPRT         |
| GgaAffx.21541.1.S1_at   | LOC770534     |
| GgaAffx.21545.1.S1_s_at | RCJMB04_35i21 |
| GgaAffx.21547.1.S1_at   | FKBP15        |
| GgaAffx.21550.1.S1_s_at | NIPSNAP1      |
| GgaAffx.21552.1.S1_at   | LOC768803     |
| GgaAffx.21552.1.S1_s_at | LOC768803     |
| GgaAffx.21562.1.S1_s_at | CCDC92        |
| GgaAffx.2157.2.S1_s_at  | CA12          |
| GgaAffx.21573.1.S1_s_at | FOXK2         |
| GgaAffx.21576.1.S1_s_at | CHGA          |
| GgaAffx.21582.1.S1_at   | LOC416951     |
| GgaAffx.21590.1.S1_at   | LOC771106     |
| GgaAffx.21591.1.S1_at   | CDCA8         |
| GgaAffx.21598.1.S1_s_at | LOC425502     |
| GgaAffx.21605.1.S1_s_at | LOC420491     |
| GgaAffx.21617.1.S1_at   | ORAOV1        |
| GgaAffx.21618.1.S1_at   | FAM91A1       |
| GgaAffx.21619.1.S1_at   | LOC771190     |
| GgaAffx.21623.1.S1_at   | CCDC72        |
| GgaAffx.21637.1.S1_s_at | LOC427838     |
| GgaAffx.21640.1.S1_s_at | C14orf83      |
| GgaAffx.21642.1.S1_at   | WSCD2         |
| GgaAffx.21656.1.S1_s_at | GIT1          |
| GgaAffx.21660.1.S1_at   | PTPRR         |
| GgaAffx.21666.1.S1_at   | SCN8A         |
| GgaAffx.21668.1.S1_s_at | BAZ1A         |
| GgaAffx.2167.1.S1_at    | LOC428995     |
| GgaAffx.21670.1.S1_at   | LOC415442     |
| GgaAffx.21695.1.S1_at   | LOC428615     |
| GgaAffx.2170.1.S1_at    | LMTK2         |
| GgaAffx.21703.1.S1_s_at | CCDC132       |
| GgaAffx.21710.1.S1_s_at | IFRD1         |

|                         |                       |
|-------------------------|-----------------------|
| GgaAffx.21716.1.S1_s_at | SLC16A1               |
| GgaAffx.2172.1.S1_s_at  | BARD1                 |
| GgaAffx.2174.1.S1_at    | PTPRT                 |
| GgaAffx.21749.1.S1_at   | XYLT1                 |
| GgaAffx.21754.1.S1_s_at | IL18                  |
| GgaAffx.21763.1.S1_s_at | CACNB4                |
| GgaAffx.21764.1.S1_s_at | GGNBP2                |
| GgaAffx.21766.1.S1_s_at | TCP11L2               |
| GgaAffx.21767.1.S1_s_at | STMN1                 |
| GgaAffx.21768.1.S1_s_at | AMH                   |
| GgaAffx.21769.1.S1_s_at | LPL                   |
| GgaAffx.21770.1.S1_s_at | LOC396009             |
| GgaAffx.21771.1.S1_at   | COL6A1                |
| GgaAffx.21772.1.S1_s_at | IL10RB                |
| GgaAffx.21775.1.S1_s_at | CYP2C45               |
| GgaAffx.21777.1.S1_s_at | LOC396417             |
| GgaAffx.21780.1.S1_s_at | GCG                   |
| GgaAffx.21780.2.S1_s_at | GCG                   |
| GgaAffx.21781.1.S1_s_at | NKX2-6                |
| GgaAffx.21785.1.S1_s_at | FOXA2                 |
| GgaAffx.21787.1.S1_s_at | BETA3                 |
| GgaAffx.21801.1.S1_at   | THPO                  |
| GgaAffx.21807.1.S1_s_at | HOXA7                 |
| GgaAffx.21813.1.S1_s_at | ZNF313                |
| GgaAffx.21814.1.S1_s_at | LIMS1 /// LOC771176   |
| GgaAffx.21817.1.S1_s_at | CDH13                 |
| GgaAffx.2182.5.S1_at    | ALDH3B1 /// LOC428812 |
| GgaAffx.21825.1.S1_s_at | CYP3A37               |
| GgaAffx.21830.1.S1_at   | ST8SIA3               |
| GgaAffx.21831.1.S1_at   | IRX4                  |
| GgaAffx.21831.1.S1_s_at | IRX4                  |
| GgaAffx.21832.1.S1_s_at | FGF13                 |
| GgaAffx.21834.1.S1_s_at | CCK                   |
| GgaAffx.21835.1.S1_s_at | GAL12                 |
| GgaAffx.21837.1.S1_s_at | GAL5                  |
| GgaAffx.21838.1.S1_s_at | GAL4                  |
| GgaAffx.21842.1.S1_s_at | GAL7                  |
| GgaAffx.21843.1.S1_s_at | CYP2H1                |
| GgaAffx.21843.2.S1_at   | CYP2C18               |
| GgaAffx.21843.2.S1_s_at | CYP2C18               |



|                        |           |
|------------------------|-----------|
| GgaAfx.21844.1.S1_s_at | CDH2      |
| GgaAfx.21849.1.S1_s_at | CAMP      |
| GgaAfx.21851.1.S1_s_at | ST8SIA6   |
| GgaAfx.21880.1.S1_s_at | PGBD3     |
| GgaAfx.21893.1.S1_at   | GALNS     |
| GgaAfx.21896.1.S1_at   | ACTR3B    |
| GgaAfx.21903.1.S1_s_at | HDAC7A    |
| GgaAfx.21905.1.S1_at   | DDX51     |
| GgaAfx.21912.1.S1_s_at | PTPN5     |
| GgaAfx.21915.1.S1_at   | IFIT5     |
| GgaAfx.21921.1.S1_at   | WDR53     |
| GgaAfx.21925.1.S1_s_at | DDX46     |
| GgaAfx.2193.2.S1_s_at  | AGPAT6    |
| GgaAfx.21935.1.S1_at   | SLC16A12  |
| GgaAfx.21938.1.S1_at   | KLHL22    |
| GgaAfx.21960.1.S1_s_at | AMOTL2    |
| GgaAfx.21963.1.S1_at   | HCK       |
| GgaAfx.21963.1.S1_s_at | HCK       |
| GgaAfx.21964.1.S1_at   | NOC3L     |
| GgaAfx.21980.1.S1_s_at | PLIN      |
| GgaAfx.21991.1.S1_at   | ASXL1     |
| GgaAfx.21994.1.S1_at   | C15orf42  |
| GgaAfx.21997.2.S1_s_at | CEP63     |
| GgaAfx.22004.3.S1_s_at | DUSP8     |
| GgaAfx.22006.1.S1_at   | MAP3K13   |
| GgaAfx.22010.1.S1_at   | LOC423097 |
| GgaAfx.22017.1.S1_at   | ABHD2     |
| GgaAfx.22018.1.S1_at   | LAO       |
| GgaAfx.22023.1.S1_s_at | ABCC6     |
| GgaAfx.22027.2.S1_s_at | VPS8      |
| GgaAfx.22031.2.S1_s_at | FER1L3    |
| GgaAfx.22036.3.S1_s_at | NOX1      |
| GgaAfx.22039.1.S1_at   | LOC429143 |
| GgaAfx.22061.1.S1_at   | RAD50     |
| GgaAfx.22061.2.S1_s_at | RAD50     |
| GgaAfx.22069.1.S1_s_at | AKAP13    |
| GgaAfx.22075.1.S1_s_at | SPATA20   |
| GgaAfx.22079.1.S1_s_at | LOC771567 |
| GgaAfx.22084.1.S1_at   | LYPLA3    |
| GgaAfx.22085.1.S1_at   | PLTP      |

|                         |               |
|-------------------------|---------------|
| GgaAffx.22087.1.S1_s_at | EIF4ENIF1     |
| GgaAffx.22095.1.S1_s_at | DLG1          |
| GgaAffx.22101.1.S1_s_at | CHKA          |
| GgaAffx.22104.1.S1_at   | LOC416615     |
| GgaAffx.22109.1.S1_s_at | LOC428674     |
| GgaAffx.2211.1.S1_s_at  | ABCA12        |
| GgaAffx.22113.1.S1_s_at | CDK5RAP2      |
| GgaAffx.22116.1.S1_at   | SMPD3         |
| GgaAffx.22118.1.S1_at   | MEGF9         |
| GgaAffx.22125.1.S1_at   | CPNE8         |
| GgaAffx.22125.2.S1_s_at | CPNE8         |
| GgaAffx.22126.1.S1_at   | CADM1         |
| GgaAffx.22129.3.S1_s_at | PITRM1        |
| GgaAffx.22140.1.S1_at   | LOC425659     |
| GgaAffx.22142.2.S1_s_at | CBX8          |
| GgaAffx.22149.1.S1_at   | DNAJC8        |
| GgaAffx.22151.1.S1_at   | ASB7          |
| GgaAffx.2216.1.S1_at    | C5orf33       |
| GgaAffx.22164.1.S1_s_at | LOC419764     |
| GgaAffx.22164.3.S1_s_at | LOC419764     |
| GgaAffx.22171.1.S1_s_at | CHSY1         |
| GgaAffx.22174.1.S1_at   | MRPL12        |
| GgaAffx.22186.2.S1_s_at | IL1RAP        |
| GgaAffx.2219.1.S1_s_at  | PEX11G        |
| GgaAffx.22193.1.S1_s_at | CADPS         |
| GgaAffx.22193.4.S1_s_at | CADPS         |
| GgaAffx.22193.5.S1_at   | CADPS         |
| GgaAffx.22194.1.S1_at   | LOC428323     |
| GgaAffx.22196.1.S1_s_at | HSPA4         |
| GgaAffx.2220.1.S1_at    | TMEM130       |
| GgaAffx.22202.3.S1_s_at | KIAA0174      |
| GgaAffx.22207.1.S1_at   | TP63          |
| GgaAffx.22211.3.S1_s_at | RCJMB04_21j12 |
| GgaAffx.22223.1.S1_s_at | SST           |
| GgaAffx.22227.1.S1_s_at | ZDHHC5        |
| GgaAffx.22231.2.S1_at   | WAC           |
| GgaAffx.2225.1.S1_s_at  | AYTL1         |
| GgaAffx.22252.1.S1_at   | COX15         |
| GgaAffx.22253.1.S1_at   | PCYT1A        |
| GgaAffx.22263.1.S1_at   | DENND4A       |

|                        |                         |
|------------------------|-------------------------|
| GgaAfx.2229.2.S1_at    | LOC770883               |
| GgaAfx.22290.3.S1_at   | LRCH3                   |
| GgaAfx.22293.1.S1_s_at | MGRN1                   |
| GgaAfx.22296.1.S1_s_at | AOF2                    |
| GgaAfx.223.2.S1_s_at   | RCJMB04_17j13           |
| GgaAfx.22303.1.S1_at   | DOT1L                   |
| GgaAfx.22308.1.S1_s_at | BTBD12                  |
| GgaAfx.22312.2.S1_s_at | MYO3A                   |
| GgaAfx.22313.1.S1_s_at | RCJMB04_17i9            |
| GgaAfx.22314.1.S1_at   | RAE1                    |
| GgaAfx.22329.1.S1_at   | BCL9L                   |
| GgaAfx.22331.1.S1_at   | ARMC9                   |
| GgaAfx.22337.2.S1_s_at | MYO1B                   |
| GgaAfx.22337.3.S1_s_at | MYO1B                   |
| GgaAfx.22338.1.S1_at   | FBXW4                   |
| GgaAfx.22343.1.S1_s_at | ARHGAP21                |
| GgaAfx.22351.1.S1_at   | KIAA2022                |
| GgaAfx.22356.4.S1_s_at | KIAA1217                |
| GgaAfx.22356.5.S1_s_at | LOC420501               |
| GgaAfx.22360.1.S1_at   | DOK5                    |
| GgaAfx.22364.1.S1_at   | LOC415641 /// LOC423151 |
| GgaAfx.22370.3.S1_at   | C17orf28                |
| GgaAfx.22376.1.S1_at   | KIAA1841                |
| GgaAfx.22377.1.S1_at   | LOC770784               |
| GgaAfx.22383.1.S1_at   | LOC771302               |
| GgaAfx.22384.1.S1_s_at | ATRX                    |
| GgaAfx.22392.1.S1_at   | C11orf57                |
| GgaAfx.22396.2.S1_at   | SPAG6                   |
| GgaAfx.22396.2.S1_s_at | SPAG6                   |
| GgaAfx.22413.1.S1_at   | MLLT10                  |
| GgaAfx.22417.1.S1_at   | RCJMB04_36h7            |
| GgaAfx.22418.1.S1_at   | PHLPPL                  |
| GgaAfx.22425.1.S1_s_at | SLC16A5                 |
| GgaAfx.2243.1.S1_s_at  | ATP2B4                  |
| GgaAfx.22440.1.S1_at   | TMEM209                 |
| GgaAfx.22440.3.S1_s_at | TMEM209                 |
| GgaAfx.22444.1.S1_at   | TSEN54                  |
| GgaAfx.22445.1.S1_s_at | MTMR3                   |
| GgaAfx.22446.1.S1_at   | HBP1                    |
| GgaAfx.22450.1.S1_at   | PRDM11                  |

|                        |                        |
|------------------------|------------------------|
| GgaAfx.2246.2.S1_s_at  | LOC770890              |
| GgaAfx.22460.1.S1_at   | MEST                   |
| GgaAfx.2247.1.A1_at    | LOC428815              |
| GgaAfx.22476.1.S1_at   | C2orf60                |
| GgaAfx.2248.1.S1_at    | LOC428816              |
| GgaAfx.22486.1.S1_s_at | SRPK2                  |
| GgaAfx.22486.2.S1_at   | SRPK2                  |
| GgaAfx.22491.2.S1_s_at | SPTBN1                 |
| GgaAfx.22513.1.S1_at   | ANKRD34A               |
| GgaAfx.22516.2.S1_s_at | LOC424944              |
| GgaAfx.22524.1.S1_at   | CCDC146                |
| GgaAfx.2253.2.S1_s_at  | ADC                    |
| GgaAfx.22530.1.S1_at   | RNPEPL1                |
| GgaAfx.22530.1.S1_s_at | RNPEPL1                |
| GgaAfx.22534.1.S1_s_at | CKAP5                  |
| GgaAfx.22534.3.S1_s_at | CKAP5                  |
| GgaAfx.22537.1.S1_at   | SLC24A6                |
| GgaAfx.22547.2.S1_at   | GZF1                   |
| GgaAfx.22547.3.S1_at   | GZF1 /// ZNF605        |
| GgaAfx.22547.6.S1_s_at | GZF1                   |
| GgaAfx.22553.1.S1_at   | ALS2CR2                |
| GgaAfx.22558.1.S1_at   | C20orf19               |
| GgaAfx.22560.1.S1_s_at | ANKRD12                |
| GgaAfx.22565.2.S1_s_at | ALS2                   |
| GgaAfx.22572.1.S1_s_at | ZBTB34                 |
| GgaAfx.22578.1.S1_at   | GNAT3                  |
| GgaAfx.22590.2.S1_at   | SLC35B4                |
| GgaAfx.22590.3.S1_s_at | SLC35B4                |
| GgaAfx.22607.1.S1_s_at | HNRPLL                 |
| GgaAfx.2261.5.S1_s_at  | DARS2                  |
| GgaAfx.22611.1.S1_at   | DLL4                   |
| GgaAfx.22614.1.A1_at   | FAM125B                |
| GgaAfx.22615.2.S1_s_at | NR2C2                  |
| GgaAfx.22617.1.S1_at   | BRD1                   |
| GgaAfx.22617.1.S1_s_at | BRD1                   |
| GgaAfx.22619.1.S1_at   | ALG12 /// RCJMB04_1n22 |
| GgaAfx.22622.1.S1_at   | FGD5                   |
| GgaAfx.22623.1.A1_at   | ZBED4                  |
| GgaAfx.22623.1.S1_at   | ZBED4                  |
| GgaAfx.22627.1.S1_at   | INOC1                  |

|                         |              |
|-------------------------|--------------|
| GgaAffx.22628.1.S1_at   | IL17REL      |
| GgaAffx.22637.1.S1_s_at | FKBP5        |
| GgaAffx.22641.1.S1_s_at | IQGAP1       |
| GgaAffx.22643.1.S1_at   | FAM125B      |
| GgaAffx.22647.2.S1_at   | MAPK11       |
| GgaAffx.22647.2.S1_s_at | MAPK11       |
| GgaAffx.22650.2.S1_s_at | LTK          |
| GgaAffx.22651.1.S1_at   | RCJMB04_4p22 |
| GgaAffx.22659.1.S1_at   | MGA          |
| GgaAffx.22660.1.S1_at   | ATF2         |
| GgaAffx.22661.1.S1_at   | RAPH1        |
| GgaAffx.22664.1.S1_s_at | SLC25A43     |
| GgaAffx.22672.1.S1_at   | CUBN         |
| GgaAffx.22675.1.S1_at   | C20orf23     |
| GgaAffx.22675.2.S1_at   | C20orf23     |
| GgaAffx.22680.1.S1_at   | WDR85        |
| GgaAffx.22681.1.S1_at   | SSX2IP       |
| GgaAffx.22683.1.S1_at   | SSX2IP       |
| GgaAffx.22684.1.S1_at   | C10orf38     |
| GgaAffx.22686.1.S1_at   | SPATA1       |
| GgaAffx.22689.1.S1_s_at | LRSAM1       |
| GgaAffx.22694.1.S1_s_at | AFTPH        |
| GgaAffx.22694.3.S1_at   | AFTPH        |
| GgaAffx.22699.1.S1_at   | ATP11B       |
| GgaAffx.22699.3.S1_s_at | ATP11B       |
| GgaAffx.22703.1.S1_at   | TXNDC13      |
| GgaAffx.22704.1.S1_at   | WDR31        |
| GgaAffx.22709.1.S1_at   | PLCB1        |
| GgaAffx.22718.1.S1_s_at | ELTD1        |
| GgaAffx.22721.1.S1_at   | RNF208       |
| GgaAffx.22723.1.S1_at   | EHBP1        |
| GgaAffx.22732.1.S1_s_at | FBXO11       |
| GgaAffx.22738.1.S1_s_at | PAK7         |
| GgaAffx.22748.1.S1_at   | MAP4K4       |
| GgaAffx.22749.2.S1_s_at | EFTUD2       |
| GgaAffx.2275.1.S1_at    | TMEM16C      |
| GgaAffx.22758.1.S1_s_at | CXorf57      |
| GgaAffx.22766.1.S1_at   | MKKS         |
| GgaAffx.22773.2.S1_at   | TMEM87A      |
| GgaAffx.22776.2.S1_s_at | LCN15        |

|                        |           |
|------------------------|-----------|
| GgaAfx.22779.1.S1_s_at | LOC420542 |
| GgaAfx.22779.2.S1_s_at | LOC420542 |
| GgaAfx.2278.1.S1_at    | SLC13A2   |
| GgaAfx.22795.1.S1_s_at | TTN       |
| GgaAfx.22799.1.S1_at   | MTM1      |
| GgaAfx.2280.1.S1_at    | FOXN1     |
| GgaAfx.22805.1.S1_at   | ANKRD26   |
| GgaAfx.22805.3.S1_s_at | ANKRD26   |
| GgaAfx.22807.1.S1_s_at | CEP27     |
| GgaAfx.22808.1.S1_at   | DGAT2     |
| GgaAfx.2281.1.S1_at    | UNC119    |
| GgaAfx.22817.1.S1_s_at | ATRNL1    |
| GgaAfx.22819.1.S1_at   | ECT2      |
| GgaAfx.22822.1.S1_s_at | CDC42BPA  |
| GgaAfx.22831.1.S1_at   | CCNF      |
| GgaAfx.22835.1.S1_at   | LOC770184 |
| GgaAfx.22838.2.S1_s_at | TBC1D24   |
| GgaAfx.22849.1.S1_at   | UBR1      |
| GgaAfx.22849.2.S1_s_at | UBR1      |
| GgaAfx.22854.1.S1_s_at | PLD1      |
| GgaAfx.22861.1.S1_s_at | BZRAP1    |
| GgaAfx.22861.2.S1_s_at | BZRAP1    |
| GgaAfx.2287.1.S1_at    | FANCF     |
| GgaAfx.22872.2.S1_s_at | TNIK      |
| GgaAfx.22873.1.S1_at   | CNIH3     |
| GgaAfx.22887.1.S1_s_at | OLA1      |
| GgaAfx.22889.1.S1_s_at | EIF3A     |
| GgaAfx.22892.1.S1_at   | CRAMP1L   |
| GgaAfx.22895.1.S1_at   | EPB41L1   |
| GgaAfx.22897.1.S1_at   | RGS6      |
| GgaAfx.22905.5.S1_s_at | ST7       |
| GgaAfx.22909.1.S1_at   | ANKIB1    |
| GgaAfx.22913.1.S1_at   | LRRC34    |
| GgaAfx.22916.2.S1_s_at | DISP1     |
| GgaAfx.22926.1.S1_at   | EVI1      |
| GgaAfx.22932.2.S1_s_at | GOLIM4    |
| GgaAfx.22938.1.S1_s_at | RAPGEF2   |
| GgaAfx.22938.4.S1_s_at | FNIP2     |
| GgaAfx.22943.1.S1_at   | NPY5R     |
| GgaAfx.22945.2.S1_s_at | RAB3GAP2  |

|                         |                         |
|-------------------------|-------------------------|
| GgaAffx.22947.1.S1_s_at | SI                      |
| GgaAffx.22951.2.S1_at   | LOC424150               |
| GgaAffx.22954.3.S1_s_at | TACC2                   |
| GgaAffx.22955.1.S1_at   | LOC416375 /// LOC425481 |
| GgaAffx.22965.1.S1_s_at | TLK1                    |
| GgaAffx.22965.2.S1_at   | TLK1                    |
| GgaAffx.2297.2.S1_s_at  | UBLCP1                  |
| GgaAffx.22971.1.S1_s_at | MPP5                    |
| GgaAffx.22987.1.S1_at   | THBS1                   |
| GgaAffx.22996.1.S1_at   | LOC422427               |
| GgaAffx.22997.1.S1_at   | CHRM5                   |
| GgaAffx.22999.1.S1_s_at | COL1A2                  |
| GgaAffx.230.1.S1_at     | ACCN1                   |
| GgaAffx.23004.1.S1_at   | RSRC1                   |
| GgaAffx.23028.1.S1_s_at | SPRED1                  |
| GgaAffx.23033.1.S1_at   | HCLS1                   |
| GgaAffx.23034.1.S1_at   | LOC770879               |
| GgaAffx.23039.3.S1_s_at | MON2                    |
| GgaAffx.23045.2.S1_s_at | ZNF770                  |
| GgaAffx.23064.2.S1_s_at | INPP4B                  |
| GgaAffx.23068.1.S1_s_at | TRERF1                  |
| GgaAffx.23072.2.S1_s_at | EML4                    |
| GgaAffx.23076.1.S1_s_at | STRN3                   |
| GgaAffx.23081.2.S1_s_at | PLEKHH2                 |
| GgaAffx.23084.1.S1_s_at | TIE1                    |
| GgaAffx.23085.1.S1_s_at | RAB3IP                  |
| GgaAffx.23089.1.S1_at   | ELOVL1                  |
| GgaAffx.23093.1.S1_s_at | BAZ1A                   |
| GgaAffx.231.1.S1_at     | GAS7                    |
| GgaAffx.2310.1.S1_at    | INSR                    |
| GgaAffx.23114.3.S1_s_at | DAAM2                   |
| GgaAffx.23122.1.S1_s_at | JMJD2A                  |
| GgaAffx.23140.1.S1_at   | KIAA0082                |
| GgaAffx.23142.1.S1_at   | CYP21                   |
| GgaAffx.23149.2.S1_s_at | LGR5                    |
| GgaAffx.23153.1.S1_s_at | CCDC131                 |
| GgaAffx.23155.1.S1_at   | RAB21                   |
| GgaAffx.23159.1.S1_at   | FBXO33                  |
| GgaAffx.2316.1.S1_at    | VPS13C                  |
| GgaAffx.23160.1.S1_at   | C14orf44                |

|                        |                     |
|------------------------|---------------------|
| GgaAfx.23163.3.S1_s_at | MFSD8               |
| GgaAfx.23171.1.S1_at   | LOC420083 /// MIER2 |
| GgaAfx.23174.3.S1_at   | LOC423347           |
| GgaAfx.23174.3.S1_s_at | LOC423347           |
| GgaAfx.23180.1.S1_at   | KRT79               |
| GgaAfx.23183.1.S1_s_at | LTBP3               |
| GgaAfx.23187.1.S1_s_at | YLPM1               |
| GgaAfx.23188.1.A1_s_at | NPM3                |
| GgaAfx.2319.1.S1_s_at  | HELZ                |
| GgaAfx.23190.1.S1_s_at | RPS6KL1             |
| GgaAfx.23192.1.S1_s_at | SLC33A1             |
| GgaAfx.23227.1.S1_at   | LOC425588           |
| GgaAfx.23229.1.S1_s_at | CP                  |
| GgaAfx.23230.1.S1_s_at | HPS3                |
| GgaAfx.23234.2.S1_s_at | LTBP1               |
| GgaAfx.23235.1.S1_at   | EBF3                |
| GgaAfx.23236.1.S1_at   | AHSA1               |
| GgaAfx.23240.1.S1_at   | STIL                |
| GgaAfx.23241.1.S1_at   | SLC5A9              |
| GgaAfx.23242.1.S1_at   | C1orf165            |
| GgaAfx.23243.1.S1_at   | FCR/L               |
| GgaAfx.23246.2.S1_s_at | AGXT2L1             |
| GgaAfx.23247.1.S1_s_at | HES5                |
| GgaAfx.23250.1.S1_s_at | PAPSS1              |
| GgaAfx.23253.1.S1_at   | FAM82A              |
| GgaAfx.23253.1.S1_s_at | FAM82A              |
| GgaAfx.23255.1.S1_at   | LOC428899           |
| GgaAfx.23256.1.S1_at   | FLRT2               |
| GgaAfx.23258.1.S1_at   | FEZ2                |
| GgaAfx.23261.1.S1_s_at | LOC422540           |
| GgaAfx.23262.1.A1_at   | GPR65               |
| GgaAfx.23262.1.S1_at   | GPR65               |
| GgaAfx.23267.1.S1_s_at | SNX25               |
| GgaAfx.23270.3.S1_at   | CC2D1B              |
| GgaAfx.23274.2.S1_s_at | ACSL1               |
| GgaAfx.23276.1.S1_at   | ZCCHC11             |
| GgaAfx.23280.1.S1_at   | CCDC111             |
| GgaAfx.23286.1.S1_at   | TFB2M               |
| GgaAfx.23288.1.S1_at   | SCP2                |
| GgaAfx.23290.2.S1_at   | EML5                |



|                        |                                |
|------------------------|--------------------------------|
| GgaAfx.23294.1.S1_s_at | WWC2                           |
| GgaAfx.23300.1.S1_at   | MIOS                           |
| GgaAfx.23308.1.S1_s_at | CCDC88C                        |
| GgaAfx.23315.1.S1_s_at | GALNT7                         |
| GgaAfx.23316.1.S1_at   | LOC772308                      |
| GgaAfx.23316.1.S1_x_at | LOC772308                      |
| GgaAfx.23319.1.S1_s_at | FMN2                           |
| GgaAfx.23329.1.S1_at   | GOLGA5                         |
| GgaAfx.2333.1.S1_at    | FANCD2                         |
| GgaAfx.23330.1.S1_at   | PPAP2B                         |
| GgaAfx.23333.1.S1_at   | SPATA4                         |
| GgaAfx.23341.5.S1_s_at | RCJMB04_31a4                   |
| GgaAfx.23342.1.S1_s_at | SNX13                          |
| GgaAfx.23356.1.S1_at   | MYSM1                          |
| GgaAfx.23359.1.S1_at   | LOC772005 /// RDH5             |
| GgaAfx.23359.2.S1_at   | RDH5                           |
| GgaAfx.2336.1.S1_at    | CHD9                           |
| GgaAfx.23361.1.S1_at   | ITGB8                          |
| GgaAfx.23371.1.S1_at   | ANTXR2                         |
| GgaAfx.23386.2.S1_at   | INADL                          |
| GgaAfx.23386.3.S1_s_at | INADL                          |
| GgaAfx.23390.1.S1_s_at | ANKRD38                        |
| GgaAfx.23394.1.S1_at   | NID1                           |
| GgaAfx.23401.4.S1_s_at | DOCK7                          |
| GgaAfx.23405.1.S1_at   | SERPINA4                       |
| GgaAfx.23422.1.S1_at   | LOC425645 /// LOC777099 /// PW |
| GgaAfx.23422.2.S1_s_at | LOC425645 /// LOC777099        |
| GgaAfx.23427.1.S1_at   | SIPA1L2                        |
| GgaAfx.23427.1.S1_s_at | SIPA1L2                        |
| GgaAfx.2343.1.S1_at    | LOC420138                      |
| GgaAfx.23434.1.S1_at   | HOXA6                          |
| GgaAfx.23440.1.S1_at   | HOXA11                         |
| GgaAfx.23440.5.A1_at   | HOXA10                         |
| GgaAfx.23445.1.S1_s_at | PTPN13                         |
| GgaAfx.23449.1.S1_at   | IFIH1                          |
| GgaAfx.23460.3.S1_s_at | ARHGAP24                       |
| GgaAfx.23461.1.S1_s_at | LIN54                          |
| GgaAfx.2347.1.S1_at    | LOC427447                      |
| GgaAfx.23470.1.S1_at   | ALX1                           |
| GgaAfx.23472.1.S1_at   | CHN2                           |

|                         |                  |       |
|-------------------------|------------------|-------|
| GgaAffx.23478.1.S1_at   | C12orf29         |       |
| GgaAffx.23480.1.S1_at   | CEP290           |       |
| GgaAffx.23480.1.S1_s_at | CEP290           |       |
| GgaAffx.23481.1.S1_at   | FAM120B          |       |
| GgaAffx.23485.2.S1_s_at | C6orf70          |       |
| GgaAffx.23486.1.S1_s_at | PLAC8            |       |
| GgaAffx.23492.1.S1_at   | HELQ             |       |
| GgaAffx.23494.2.S1_at   | PLCH2            |       |
| GgaAffx.23503.1.S1_at   | SATB1            |       |
| GgaAffx.23507.3.S1_at   | WDFY3            |       |
| GgaAffx.23508.1.S1_at   | ATP2B1           |       |
| GgaAffx.2351.1.S1_at    | RORA             |       |
| GgaAffx.2351.2.S1_s_at  | RORA             |       |
| GgaAffx.23512.1.S1_s_at | DEPDC1           |       |
| GgaAffx.23525.1.S1_s_at | MLLT4            |       |
| GgaAffx.23536.1.S1_at   | HERPUD1          |       |
| GgaAffx.23540.1.S1_at   | PRKAG3 /// TTLL4 |       |
| GgaAffx.23541.1.S1_at   | C14orf131        |       |
| GgaAffx.23543.1.S1_at   | RABGGTB          |       |
| GgaAffx.23547.1.S1_at   | USP44            |       |
| GgaAffx.23558.1.S1_at   | C17orf38         |       |
| GgaAffx.23562.1.S1_at   | USP37            |       |
| GgaAffx.23564.2.S1_s_at | CDC42BPB         |       |
| GgaAffx.23573.1.S1_at   |                  | 41163 |
| GgaAffx.23576.1.S1_at   | NUP54            |       |
| GgaAffx.23578.1.S1_at   | APAF1            |       |
| GgaAffx.23586.1.S1_at   | UHRF1BP1L        |       |
| GgaAffx.2359.1.S1_at    | SIN3B            |       |
| GgaAffx.23592.1.S1_at   | RUFY3            |       |
| GgaAffx.23592.4.S1_s_at | RUFY3            |       |
| GgaAffx.23594.1.S1_at   | SIRT6            |       |
| GgaAffx.23610.1.S1_s_at | SLC22A2          |       |
| GgaAffx.23610.2.S1_at   | SLC22A2          |       |
| GgaAffx.23614.1.S1_at   | COX18            |       |
| GgaAffx.2362.1.S1_at    | LOC428823        |       |
| GgaAffx.23623.1.S1_at   | AHNAK2           |       |
| GgaAffx.23623.1.S1_s_at | AHNAK2           |       |
| GgaAffx.23632.1.S1_at   | PDIA5            |       |
| GgaAffx.23636.1.S1_at   | AGBL3            |       |
| GgaAffx.23654.1.S1_at   | UBE1L2           |       |

|                        |                                 |
|------------------------|---------------------------------|
| GgaAfx.23666.1.S1_at   | HIST2H2AC /// LOC427881 /// LOC |
| GgaAfx.23672.1.S1_at   | LZTFL1                          |
| GgaAfx.23678.1.S1_s_at | SULT1E1                         |
| GgaAfx.23685.1.S1_s_at | LIMD1                           |
| GgaAfx.2370.1.S1_at    | FYB                             |
| GgaAfx.2370.1.S1_s_at  | FYB                             |
| GgaAfx.23700.2.S1_s_at | KIF15                           |
| GgaAfx.23701.1.S1_at   | TMEM186                         |
| GgaAfx.23716.1.S1_at   | FBXL2                           |
| GgaAfx.2372.1.S1_s_at  | RCJMB04_14f2                    |
| GgaAfx.23721.2.S1_s_at | PDE5A                           |
| GgaAfx.23729.1.S1_at   | SEC24D                          |
| GgaAfx.23729.2.S1_s_at | SEC24D                          |
| GgaAfx.2373.1.S1_s_at  | FYB                             |
| GgaAfx.23731.1.S1_at   | PRSS12                          |
| GgaAfx.23736.1.S1_s_at | SLC25A17                        |
| GgaAfx.23737.1.S1_at   | LOC430152                       |
| GgaAfx.23739.1.S1_at   | ARSJ                            |
| GgaAfx.23763.1.S1_at   | SLC12A8                         |
| GgaAfx.23767.1.S1_at   | LBA1                            |
| GgaAfx.2377.1.S1_at    | IL28B                           |
| GgaAfx.23776.1.S1_at   | FAIM                            |
| GgaAfx.23778.1.S1_s_at | NAT12                           |
| GgaAfx.23779.1.S1_at   | C14orf108                       |
| GgaAfx.23783.1.S1_at   | ANLN                            |
| GgaAfx.23792.1.S1_at   | RCN1                            |
| GgaAfx.23793.1.S1_s_at | C1orf130                        |
| GgaAfx.23800.1.S1_at   | SLC35F5                         |
| GgaAfx.23801.1.S1_s_at | LOC769503 /// LOC770605 /// LOC |
| GgaAfx.23809.1.S1_at   | BBS9                            |
| GgaAfx.23813.1.S1_s_at | SAMD4A                          |
| GgaAfx.23815.1.S1_at   | KIAA0241                        |
| GgaAfx.23815.2.S1_s_at | KIAA0241                        |
| GgaAfx.23816.1.S1_at   | CGRRF1                          |
| GgaAfx.23819.3.S1_s_at | CCNT2                           |
| GgaAfx.23830.1.S1_at   | KLHDC1                          |
| GgaAfx.23837.4.S1_s_at | R3HDM1                          |
| GgaAfx.23838.1.S1_s_at | DDX17                           |
| GgaAfx.23840.1.S1_s_at | ADH1C                           |
| GgaAfx.23844.1.S1_s_at | UTRN                            |

|                         |                     |
|-------------------------|---------------------|
| GgaAffx.23852.1.S1_at   | MTTP                |
| GgaAffx.23859.1.S1_s_at | PLA2G6              |
| GgaAffx.23860.1.S1_at   | LOC776580           |
| GgaAffx.23862.1.S1_at   | POU6F2              |
| GgaAffx.23866.1.S1_at   | C7orf11             |
| GgaAffx.23867.1.S1_at   | NHEDC2              |
| GgaAffx.23870.1.S1_at   | SAV1                |
| GgaAffx.23874.1.S1_s_at | MAP3K7IP2           |
| GgaAffx.23874.2.S1_at   | MAP3K7IP2           |
| GgaAffx.23878.1.S1_at   | NIN                 |
| GgaAffx.23880.1.S1_at   | C6orf72             |
| GgaAffx.23882.1.S1_at   | SPOPL               |
| GgaAffx.23883.1.S1_at   | PPP1R14C            |
| GgaAffx.23887.1.S1_at   | TXNDC16             |
| GgaAffx.23903.1.S1_s_at | GGA1                |
| GgaAffx.23909.4.S1_at   | ADCY1 /// LOC420787 |
| GgaAffx.23912.2.S1_s_at | ZEB2                |
| GgaAffx.23916.1.S1_at   | HUS1                |
| GgaAffx.23924.2.S1_s_at | KIF5C               |
| GgaAffx.23925.1.S1_at   | LOC420793           |
| GgaAffx.23927.4.S1_s_at | RBL1                |
| GgaAffx.23929.1.S1_at   | NFX1                |
| GgaAffx.23934.2.S1_at   | SLC12A7             |
| GgaAffx.23934.3.S1_at   | SLC12A7             |
| GgaAffx.23936.1.S1_at   | RCJMB04_10a6        |
| GgaAffx.23937.1.S1_s_at | MYH9                |
| GgaAffx.23939.1.S1_s_at | GPD2                |
| GgaAffx.23940.1.S1_at   | UPP2                |
| GgaAffx.23944.1.S1_at   | TANC1               |
| GgaAffx.23946.1.S1_s_at | ZCCHC6              |
| GgaAffx.23947.1.S1_at   | PRDM4               |
| GgaAffx.23950.1.S1_at   | CDC14C              |
| GgaAffx.23970.1.S1_s_at | NUAK1               |
| GgaAffx.23972.1.S1_at   | GPLD1               |
| GgaAffx.23973.1.S1_at   | KIAA1033            |
| GgaAffx.23974.1.S1_at   | CDKAL1              |
| GgaAffx.23974.1.S1_s_at | CDKAL1              |
| GgaAffx.23976.1.S1_at   | RCJMB04_11d23       |
| GgaAffx.23986.1.S1_at   | GFOD1               |
| GgaAffx.23993.1.S1_at   | GNPTAB              |

|                        |                                 |
|------------------------|---------------------------------|
| GgaAfx.23993.3.S1_s_at | GNPTAB                          |
| GgaAfx.23994.1.S1_at   | LIAS                            |
| GgaAfx.240.5.S1_s_at   | RCJMB04_7e17                    |
| GgaAfx.24000.1.S1_at   | DSP                             |
| GgaAfx.24000.1.S1_s_at | DSP                             |
| GgaAfx.24000.2.S1_s_at | DSP                             |
| GgaAfx.24003.1.S1_x_at | LYRM4                           |
| GgaAfx.24004.1.S1_at   | CDYL                            |
| GgaAfx.24005.1.S1_at   | PRPF4B                          |
| GgaAfx.24006.1.A1_at   | C6orf86                         |
| GgaAfx.24015.3.S1_s_at | SLC37A3                         |
| GgaAfx.24019.2.S1_at   | DENND2A                         |
| GgaAfx.24028.1.S1_s_at | CREB3L2                         |
| GgaAfx.24033.1.S1_at   | DGKI                            |
| GgaAfx.24033.1.S1_s_at | DGKI                            |
| GgaAfx.24039.1.S1_s_at | TTLL11                          |
| GgaAfx.24044.3.S1_s_at | YARS2                           |
| GgaAfx.24049.1.S1_at   | DNM1L                           |
| GgaAfx.24053.1.S1_s_at | RCJMB04_9b7                     |
| GgaAfx.24061.1.S1_at   | MYO10                           |
| GgaAfx.24061.2.S1_s_at | MYO10                           |
| GgaAfx.24065.1.S1_at   | TTLL11                          |
| GgaAfx.24065.1.S1_s_at | TTLL11                          |
| GgaAfx.24070.1.S1_at   | C6orf97                         |
| GgaAfx.24072.1.S1_at   | C6orf98                         |
| GgaAfx.24073.1.S1_at   | CDYL2                           |
| GgaAfx.24078.1.S1_s_at | TRIO                            |
| GgaAfx.24078.5.S1_s_at | TRIO                            |
| GgaAfx.2408.1.S1_at    | MID2                            |
| GgaAfx.24089.1.S1_s_at | ERC1                            |
| GgaAfx.24090.1.S1_at   | FBXL14                          |
| GgaAfx.24095.2.S1_at   | LOC430333                       |
| GgaAfx.24097.1.S1_s_at | MICAL3                          |
| GgaAfx.24100.1.S1_s_at | SEMA5A                          |
| GgaAfx.24101.1.S1_at   | MTRR                            |
| GgaAfx.24104.1.S1_at   | MGST1                           |
| GgaAfx.24111.1.S1_s_at | LOC768469 /// LOC770493 /// LOC |
| GgaAfx.24116.1.S1_at   | ADAMTS15                        |
| GgaAfx.24122.1.S1_s_at | C9orf4                          |
| GgaAfx.24123.1.S1_at   | PDE3A                           |

|                        |                                 |
|------------------------|---------------------------------|
| GgaAfx.24128.1.S1_at   | LOC430333 /// LOC772321 /// LOC |
| GgaAfx.24135.1.S1_s_at | SEMA7A                          |
| GgaAfx.24149.1.S1_at   | KIAA0528                        |
| GgaAfx.24149.3.S1_s_at | KIAA0528                        |
| GgaAfx.24149.4.S1_s_at | KIAA0528                        |
| GgaAfx.2416.1.S1_at    | HELZ                            |
| GgaAfx.24163.1.S1_at   | PRMT8                           |
| GgaAfx.24163.2.S1_s_at | PRMT8                           |
| GgaAfx.24166.1.S1_s_at | KIAA1219                        |
| GgaAfx.24166.3.S1_s_at | KIAA1219                        |
| GgaAfx.24166.4.S1_s_at | KIAA1219                        |
| GgaAfx.24185.1.S1_at   | IL7R                            |
| GgaAfx.24191.1.S1_s_at | PWWP2A                          |
| GgaAfx.24200.1.S1_at   | LOC426100                       |
| GgaAfx.24202.1.S1_at   | RANBP10                         |
| GgaAfx.2421.1.S1_s_at  | TIMD4                           |
| GgaAfx.24216.1.S1_at   | LOC415891                       |
| GgaAfx.24232.3.S1_s_at | LRRC16A                         |
| GgaAfx.24236.1.S1_at   | RBM16                           |
| GgaAfx.24240.1.S1_s_at | TFB1M                           |
| GgaAfx.24242.1.S1_at   | ZNF236                          |
| GgaAfx.24242.2.S1_s_at | ZNF236                          |
| GgaAfx.24245.1.S1_at   | TSHZ1                           |
| GgaAfx.2425.1.S1_at    | CCR7                            |
| GgaAfx.24252.1.S1_at   | C10orf137                       |
| GgaAfx.24252.1.S1_s_at | C10orf137                       |
| GgaAfx.24253.1.S1_at   | KPNB1                           |
| GgaAfx.24269.1.S1_at   | AASDH                           |
| GgaAfx.24271.1.S1_at   | LOC422745                       |
| GgaAfx.24272.1.S1_at   | FUCA2                           |
| GgaAfx.24275.2.S1_s_at | CEP135                          |
| GgaAfx.24277.1.S1_s_at | EXOC1                           |
| GgaAfx.24279.1.S1_at   | LSMD1                           |
| GgaAfx.24281.1.S1_s_at | HIVEP2                          |
| GgaAfx.24282.1.S1_at   | SRD5A3 /// TMEM165              |
| GgaAfx.24283.1.S1_at   | UBAP2                           |
| GgaAfx.24287.1.S1_s_at | PML                             |
| GgaAfx.24289.1.S1_at   | SYNJ2BP                         |
| GgaAfx.24290.1.S1_at   | DUSP16                          |
| GgaAfx.24294.1.S1_at   | AFG3L2 /// LOC425565            |

|                        |                                 |
|------------------------|---------------------------------|
| GgaAfx.243.1.S1_s_at   | DHDDS                           |
| GgaAfx.24300.1.S1_s_at | PCYOX1                          |
| GgaAfx.24301.1.S1_s_at | CEP192                          |
| GgaAfx.24305.1.S1_at   | MAP3K5                          |
| GgaAfx.24329.1.A1_at   | FBXO40                          |
| GgaAfx.24331.1.S1_s_at | HNRPA3P2                        |
| GgaAfx.24337.1.S1_at   | C1orf77                         |
| GgaAfx.24339.1.S1_x_at | CHIR2D-956 /// LOC425235 /// LC |
| GgaAfx.24344.1.S1_s_at | NISCH                           |
| GgaAfx.24355.1.S1_at   | NRBP2                           |
| GgaAfx.2436.4.S1_at    | SLC6A5                          |
| GgaAfx.2436.4.S1_s_at  | SLC6A5                          |
| GgaAfx.24375.2.S1_at   | PLA2G5                          |
| GgaAfx.24377.2.S1_s_at | PARVB                           |
| GgaAfx.24380.1.S1_at   | ARHGAP8                         |
| GgaAfx.24381.1.S1_at   | TBC1D1                          |
| GgaAfx.24388.1.S1_at   | MFAP5                           |
| GgaAfx.24389.1.S1_at   | LOC772329                       |
| GgaAfx.2440.4.S1_s_at  | PIGT                            |
| GgaAfx.24406.1.S1_at   | LOC422804                       |
| GgaAfx.24424.1.S1_at   | CDC37L1                         |
| GgaAfx.24426.1.S1_at   | STAB1                           |
| GgaAfx.24428.1.S1_at   | RCJMB04_1p22                    |
| GgaAfx.24429.1.A1_at   | LOC426599                       |
| GgaAfx.24433.1.S1_at   | VPS16                           |
| GgaAfx.24435.1.S1_at   | CDCA3                           |
| GgaAfx.24435.1.S1_s_at | CDCA3                           |
| GgaAfx.24437.2.S1_s_at | CC2D2A                          |
| GgaAfx.24452.1.S1_s_at | ATN1                            |
| GgaAfx.24457.1.S1_s_at | PNPLA2                          |
| GgaAfx.24459.2.S1_s_at | MBOAT5                          |
| GgaAfx.24462.1.S1_at   | ZZEF1                           |
| GgaAfx.24471.1.S1_at   | LMOD3 /// LOC426075             |
| GgaAfx.24484.2.S1_s_at | C1R                             |
| GgaAfx.24485.1.S1_s_at | RCJMB04_11e18                   |
| GgaAfx.24486.1.S1_at   | FBN2                            |
| GgaAfx.24487.1.S1_at   | PRRC1                           |
| GgaAfx.24491.1.S1_at   | MIER3                           |
| GgaAfx.24492.1.S1_at   | GABARAPL3                       |
| GgaAfx.24497.1.S1_at   | TRPV6                           |

|                        |           |
|------------------------|-----------|
| GgaAfx.24513.8.S1_at   | EPB41L3   |
| GgaAfx.24516.1.S1_s_at | ERBB2IP   |
| GgaAfx.24516.2.S1_s_at | ERBB2IP   |
| GgaAfx.2452.1.S1_s_at  | APBA2     |
| GgaAfx.24520.2.S1_s_at | SFRS12    |
| GgaAfx.24534.1.S1_at   | C7        |
| GgaAfx.24538.1.S1_at   | C6orf60   |
| GgaAfx.24540.1.S1_s_at | DCBLD1    |
| GgaAfx.24545.1.S1_at   | ENC1      |
| GgaAfx.24548.1.S1_at   | ESCO1     |
| GgaAfx.24549.1.S1_at   | ANKRD31   |
| GgaAfx.24553.1.S1_at   | DSE       |
| GgaAfx.24555.1.S1_s_at | COL10A1   |
| GgaAfx.2456.1.S1_at    | LONP2     |
| GgaAfx.24566.1.S1_at   | LAMA4     |
| GgaAfx.24574.1.S1_at   | CD274     |
| GgaAfx.24577.1.S1_s_at | REV3L     |
| GgaAfx.24579.2.S1_s_at | ANKRD29   |
| GgaAfx.24580.1.S1_at   | KIAA1919  |
| GgaAfx.24583.1.S1_at   | LOC418339 |
| GgaAfx.24584.1.S1_at   | LOC427229 |
| GgaAfx.24591.1.S1_at   | LOC418339 |
| GgaAfx.24607.4.S1_s_at | ADAMTSL1  |
| GgaAfx.24611.2.S1_s_at | LOC428525 |
| GgaAfx.24613.1.S1_at   | ZNF521    |
| GgaAfx.24617.1.S1_at   | LOC418360 |
| GgaAfx.24618.1.S1_s_at | ZFAND5    |
| GgaAfx.2462.1.S1_at    | LOC422137 |
| GgaAfx.24632.1.S1_at   | SNTG1     |
| GgaAfx.24633.1.S1_at   | TTF2      |
| GgaAfx.24638.1.S1_at   | HISPPD1   |
| GgaAfx.24638.1.S1_s_at | HISPPD1   |
| GgaAfx.24639.1.S1_at   | FILIP1L   |
| GgaAfx.24643.1.S1_at   | SESN1     |
| GgaAfx.24644.1.S1_at   | FOXO3     |
| GgaAfx.24648.1.S1_at   | RNF38     |
| GgaAfx.24654.1.S1_at   | PCGF3     |
| GgaAfx.24656.1.S1_s_at | ATG16L1   |
| GgaAfx.24673.1.S1_at   | ARL13B    |
| GgaAfx.24674.1.A1_at   | STX19     |



|                        |           |
|------------------------|-----------|
| GgaAfx.24674.1.S1_at   | STX19     |
| GgaAfx.24676.1.S1_at   | EPHA6     |
| GgaAfx.24681.1.S1_at   | NSMAF     |
| GgaAfx.24683.1.S1_s_at | ILDR2     |
| GgaAfx.24689.1.S1_at   | CHD7      |
| GgaAfx.2469.1.S1_at    | C5orf4    |
| GgaAfx.24692.2.S1_s_at | PDZK1     |
| GgaAfx.24694.1.S1_s_at | GBE1      |
| GgaAfx.247.1.S1_at     | ENTPD4    |
| GgaAfx.247.2.S1_s_at   | ENTPD4    |
| GgaAfx.24703.2.S1_at   | JAKMIP1   |
| GgaAfx.24709.1.S1_s_at | LOC771304 |
| GgaAfx.24711.1.S1_at   | SH3TC1    |
| GgaAfx.24718.5.S1_at   | SLCO5A1   |
| GgaAfx.24720.1.S1_at   | LOC768383 |
| GgaAfx.24722.1.S1_at   | MAP3K7    |
| GgaAfx.24729.2.S1_s_at | NCOA2     |
| GgaAfx.24733.1.S1_at   | XRCC4     |
| GgaAfx.24733.1.S1_s_at | XRCC4     |
| GgaAfx.24734.1.S1_s_at | RGS12     |
| GgaAfx.24735.1.S1_at   | LOC420181 |
| GgaAfx.2474.1.S1_s_at  | BCORL1    |
| GgaAfx.2474.3.S1_s_at  | BCORL1    |
| GgaAfx.24752.1.S1_at   | KIAA0368  |
| GgaAfx.24753.1.S1_s_at | WHSC1     |
| GgaAfx.24769.1.S1_s_at | ANKRD6    |
| GgaAfx.24771.1.S1_at   | RRAGD     |
| GgaAfx.24772.1.S1_at   | C17orf59  |
| GgaAfx.24775.1.S1_at   | SNX16     |
| GgaAfx.24784.1.S1_at   | TIAM1     |
| GgaAfx.24796.1.S1_at   | WWP1      |
| GgaAfx.24804.1.S1_at   | FILIP1    |
| GgaAfx.24805.1.S1_at   | SLC7A7    |
| GgaAfx.24812.1.S1_s_at | C21orf66  |
| GgaAfx.24815.2.S1_at   | ASRGL1    |
| GgaAfx.24816.1.S1_at   | OGFRL1    |
| GgaAfx.24817.1.S1_s_at | KIAA1429  |
| GgaAfx.24819.1.S1_at   | TMEM50B   |
| GgaAfx.24824.1.S1_at   | FASTKD5   |
| GgaAfx.24833.1.S1_at   | ALMS1     |

|                         |                         |
|-------------------------|-------------------------|
| GgaAffx.24835.2.S1_s_at | RNF19A                  |
| GgaAffx.24836.1.S1_at   | HLCS                    |
| GgaAffx.24837.1.S1_at   | KLF10                   |
| GgaAffx.24840.3.S1_s_at | BRWD1                   |
| GgaAffx.24843.1.S1_s_at | RIMS2                   |
| GgaAffx.24845.1.S1_at   | ALMS1                   |
| GgaAffx.24849.1.S1_at   | LOC428379 /// LOC772340 |
| GgaAffx.2485.2.S1_at    | PHKB                    |
| GgaAffx.2485.3.S1_s_at  | PHKB                    |
| GgaAffx.24855.3.S1_s_at | CSMD3                   |
| GgaAffx.2486.1.S1_at    | SAP30L                  |
| GgaAffx.24867.1.S1_s_at | PRDM15                  |
| GgaAffx.24867.3.S1_s_at | PRDM15                  |
| GgaAffx.24869.1.S1_at   | PTP4A3                  |
| GgaAffx.24869.1.S1_s_at | PTP4A3                  |
| GgaAffx.24887.1.S1_at   | CXorf36                 |
| GgaAffx.24893.1.S1_s_at | KDM6A                   |
| GgaAffx.24895.1.S1_at   | FUNDC1                  |
| GgaAffx.24898.2.S1_s_at | EFHC2                   |
| GgaAffx.24899.1.S1_at   | RCJMB04_1d13            |
| GgaAffx.24899.1.S1_s_at | RCJMB04_1d13            |
| GgaAffx.24912.1.S1_s_at | BCOR                    |
| GgaAffx.24917.1.S1_s_at | EFR3A                   |
| GgaAffx.24921.2.S1_s_at | MAP3K7IP3               |
| GgaAffx.24932.3.S1_s_at | POLA1                   |
| GgaAffx.24934.1.S1_at   | GCLC                    |
| GgaAffx.24935.1.S1_at   | ELOVL5                  |
| GgaAffx.24936.1.S1_at   | PCYT1B                  |
| GgaAffx.24937.1.S1_s_at | MCPH1                   |
| GgaAffx.24946.2.S1_at   | ZHX1                    |
| GgaAffx.24953.1.S1_at   | KIDINS220               |
| GgaAffx.24956.1.S1_s_at | MAP7D2                  |
| GgaAffx.24956.3.S1_s_at | MAP7D2                  |
| GgaAffx.24967.1.S1_at   | SMC6                    |
| GgaAffx.24973.1.S1_at   | APOB                    |
| GgaAffx.2499.1.S1_at    | PHF12                   |
| GgaAffx.24992.1.S1_s_at | DTNB                    |
| GgaAffx.24999.1.S1_s_at | EPHX2                   |
| GgaAffx.2501.2.S1_s_at  | LOC424420               |
| GgaAffx.25017.1.S1_at   | FZD3                    |

|                         |                         |       |
|-------------------------|-------------------------|-------|
| GgaAffx.25019.1.S1_at   | KIF13B                  |       |
| GgaAffx.25021.1.S1_s_at | MSRA                    |       |
| GgaAffx.25022.1.S1_at   | XKR6                    |       |
| GgaAffx.25044.1.S1_at   | PHF16                   |       |
| GgaAffx.25048.1.S1_s_at | CYFIP1                  |       |
| GgaAffx.25050.1.S1_at   | HERC2                   |       |
| GgaAffx.25059.1.S1_at   | LYG2                    |       |
| GgaAffx.25060.1.S1_at   | EIF5B                   |       |
| GgaAffx.25074.1.S1_s_at | MAP4K4                  |       |
| GgaAffx.25078.1.S1_at   |                         | 41162 |
| GgaAffx.2508.2.S1_s_at  | RGS9                    |       |
| GgaAffx.25081.1.S1_s_at | RASA3                   |       |
| GgaAffx.25088.1.S1_s_at | MYO16                   |       |
| GgaAffx.25088.2.S1_at   | MYO16                   |       |
| GgaAffx.25096.1.S1_at   | TMTC4                   |       |
| GgaAffx.25107.6.S1_s_at | DOCK9                   |       |
| GgaAffx.2511.1.S1_at    | MICALL2                 |       |
| GgaAffx.25114.3.S1_s_at | MBNL2                   |       |
| GgaAffx.25117.1.S1_s_at | DZIP1                   |       |
| GgaAffx.25119.1.A1_at   | SLITRK1                 |       |
| GgaAffx.25124.1.S1_s_at | RBM26                   |       |
| GgaAffx.25124.2.S1_at   | RBM26                   |       |
| GgaAffx.25124.3.S1_s_at | RBM26                   |       |
| GgaAffx.25126.1.S1_s_at | C13orf7                 |       |
| GgaAffx.25129.1.S1_at   | COMMD6                  |       |
| GgaAffx.2513.1.S1_at    | TET1                    |       |
| GgaAffx.25134.1.S1_s_at | DIS3                    |       |
| GgaAffx.25138.1.S1_at   | OLFM4                   |       |
| GgaAffx.25142.1.S1_s_at | COG3                    |       |
| GgaAffx.25143.1.S1_s_at | ZC3H13                  |       |
| GgaAffx.25146.1.S1_at   | LRCH1                   |       |
| GgaAffx.25146.2.S1_at   | LRCH1                   |       |
| GgaAffx.25146.2.S1_s_at | LRCH1                   |       |
| GgaAffx.25150.1.S1_at   | KCNRG                   |       |
| GgaAffx.25151.1.S1_at   | DHRS12                  |       |
| GgaAffx.25155.1.S1_at   | DCLK1                   |       |
| GgaAffx.25166.1.S1_s_at | PAN3                    |       |
| GgaAffx.25168.2.S1_s_at | LOC415664 /// LOC427532 |       |
| GgaAffx.25173.1.S1_at   | TNFRSF19                |       |
| GgaAffx.2518.1.S1_at    | THSD4                   |       |

|                        |                      |
|------------------------|----------------------|
| GgaAfx.25180.2.A1_at   | LOC771527            |
| GgaAfx.25196.2.S1_s_at | LOC418990            |
| GgaAfx.25198.2.S1_at   | FAM76B               |
| GgaAfx.25199.1.S1_at   | DUS3L                |
| GgaAfx.25200.1.S1_at   | PANX1                |
| GgaAfx.25213.2.S1_s_at | RAB30                |
| GgaAfx.25215.2.S1_s_at | PCF11                |
| GgaAfx.2522.1.S1_at    | TMCO4                |
| GgaAfx.2522.2.S1_s_at  | TMCO4                |
| GgaAfx.25227.8.S1_s_at | NARS2                |
| GgaAfx.25229.1.S1_at   | VWF                  |
| GgaAfx.25232.1.S1_s_at | GADD45B              |
| GgaAfx.25233.1.S1_at   | CUX1                 |
| GgaAfx.25237.1.S1_at   | SLCO2B1              |
| GgaAfx.25241.1.S1_at   | KIAA0280             |
| GgaAfx.25253.1.S1_at   | SPDYA                |
| GgaAfx.25254.1.A1_at   | TXNL4A               |
| GgaAfx.25256.1.S1_at   | TBC1D1               |
| GgaAfx.25266.1.S1_at   | LOC426599            |
| GgaAfx.2527.3.S1_at    | ZDHHC13              |
| GgaAfx.25274.1.S1_s_at | DNASE1 /// LOC768347 |
| GgaAfx.25278.1.S1_at   | LOC426179            |
| GgaAfx.25280.1.S1_at   | COTL1                |
| GgaAfx.25285.1.S1_s_at | RCJMB04_20b24        |
| GgaAfx.25290.1.S1_s_at | LOC426125            |
| GgaAfx.25291.1.S1_at   | RCJMB04_3m23         |
| GgaAfx.25293.1.S1_at   | SCRIB                |
| GgaAfx.25309.1.S1_s_at | PRPSAP1              |
| GgaAfx.25314.1.S1_at   | VIT2                 |
| GgaAfx.25317.2.S1_at   | C9orf72              |
| GgaAfx.25322.1.S1_at   | LOC419425            |
| GgaAfx.25325.3.S1_s_at | NTNG1                |
| GgaAfx.25331.1.S1_at   | SAFB2                |
| GgaAfx.25344.1.S1_s_at | ABCA3                |
| GgaAfx.25349.1.S1_at   | LOC776973 /// RSF1   |
| GgaAfx.25349.2.S1_s_at | LOC776973 /// RSF1   |
| GgaAfx.25355.1.A1_at   | C19orf22             |
| GgaAfx.25358.2.S1_s_at | LIMS2                |
| GgaAfx.25361.1.A1_at   | GPR17                |
| GgaAfx.25365.1.S1_at   | COMT                 |

|                         |                          |
|-------------------------|--------------------------|
| GgaAffx.25369.2.S1_s_at | AHCY                     |
| GgaAffx.2537.1.S1_at    | SSH2                     |
| GgaAffx.25371.2.S1_at   | LOC423613                |
| GgaAffx.25372.1.S1_at   | DENND2C                  |
| GgaAffx.25374.2.S1_at   | WDR33                    |
| GgaAffx.25376.1.S1_at   | CAMK4                    |
| GgaAffx.25377.1.S1_s_at | DGCR8                    |
| GgaAffx.25386.1.S1_at   | DOCK2                    |
| GgaAffx.25388.1.S1_at   | NAGPA                    |
| GgaAffx.25392.2.S1_s_at | PFKFB4                   |
| GgaAffx.25418.1.S1_at   | KIF14                    |
| GgaAffx.25432.1.S1_at   | KLHL6                    |
| GgaAffx.25432.1.S1_s_at | KLHL6                    |
| GgaAffx.2544.1.S1_at    | DNAJA2                   |
| GgaAffx.25442.4.S1_at   | SEMA6A                   |
| GgaAffx.25443.1.S1_s_at | CNOT1                    |
| GgaAffx.25446.3.S1_s_at | YEATS2                   |
| GgaAffx.25465.1.S1_s_at | CLSPN                    |
| GgaAffx.25485.1.S1_at   | ORMDL1 /// RCJMB04_14o23 |
| GgaAffx.25487.1.S1_at   | AVR2 /// LOC427416       |
| GgaAffx.25493.1.S1_at   | SIL1                     |
| GgaAffx.25502.2.S1_at   | SLC2A5                   |
| GgaAffx.25507.1.S1_at   | GLRX2                    |
| GgaAffx.25510.1.S1_at   | SFRS8                    |
| GgaAffx.25510.3.S1_at   | SFRS8                    |
| GgaAffx.25521.1.S1_s_at | COL5A2                   |
| GgaAffx.25534.1.S1_s_at | COL3A1                   |
| GgaAffx.25542.1.S1_at   | GULP1                    |
| GgaAffx.25548.1.S1_s_at | RABGEF1                  |
| GgaAffx.2556.3.S1_at    | LOC768580                |
| GgaAffx.25560.1.S1_s_at | LOC419703 /// SIK2       |
| GgaAffx.25561.1.S1_s_at | PIWIL1                   |
| GgaAffx.25563.1.S1_s_at | UBE4B                    |
| GgaAffx.25567.1.S1_at   | NEFL                     |
| GgaAffx.25575.1.S1_at   | SBNO2                    |
| GgaAffx.25575.1.S1_s_at | SBNO2                    |
| GgaAffx.25575.5.S1_s_at | SBNO2                    |
| GgaAffx.25584.4.S1_s_at | LOC415683                |
| GgaAffx.25592.1.S1_at   | LOC415345                |
| GgaAffx.25594.1.S1_at   | CSNK1D                   |

|                         |                               |
|-------------------------|-------------------------------|
| GgaAffx.25595.1.S1_s_at | AQP5                          |
| GgaAffx.25603.1.S1_at   | AKAP7 /// LOC768867           |
| GgaAffx.2561.1.S1_at    | CYSLTR1                       |
| GgaAffx.25616.3.S1_at   | NBR1                          |
| GgaAffx.25617.1.S1_at   | SNRPC                         |
| GgaAffx.25618.1.S1_at   | FA2H                          |
| GgaAffx.25622.3.S1_at   | USP52                         |
| GgaAffx.25626.2.S1_s_at | MED23                         |
| GgaAffx.25630.2.S1_s_at | MAP2                          |
| GgaAffx.25640.1.S1_at   | RND2                          |
| GgaAffx.25641.1.S1_at   | STK10                         |
| GgaAffx.25642.1.S1_at   | VAT1                          |
| GgaAffx.25648.1.S1_at   | PEX14                         |
| GgaAffx.25653.1.S1_at   | LOC425347                     |
| GgaAffx.25653.2.S1_at   | ZNF532                        |
| GgaAffx.25672.1.S1_s_at | ASPCR1                        |
| GgaAffx.25686.1.S1_at   | CLEC2B /// CLEC2D /// LOC4170 |
| GgaAffx.25686.1.S1_x_at | CLEC2B /// CLEC2D /// LOC4170 |
| GgaAffx.25695.2.S1_s_at | LOC426235 /// LOC772002       |
| GgaAffx.25695.3.S1_s_at | LOC426235                     |
| GgaAffx.25699.1.S1_at   | DHX37                         |
| GgaAffx.25709.1.S1_s_at | SERPINF2                      |
| GgaAffx.2571.1.S1_at    | KCNK15                        |
| GgaAffx.25710.1.S1_at   | CA10                          |
| GgaAffx.25716.1.S1_at   | WDR7                          |
| GgaAffx.25719.2.S1_s_at | RCJMB04_22m21                 |
| GgaAffx.2572.1.S1_at    | MYO1E                         |
| GgaAffx.25721.1.S1_at   | DDX41                         |
| GgaAffx.25722.2.S1_s_at | SLC37A2                       |
| GgaAffx.25739.2.S1_s_at | EXOSC10                       |
| GgaAffx.25755.1.S1_s_at | NCOR2                         |
| GgaAffx.25755.4.S1_s_at | NCOR2                         |
| GgaAffx.25763.1.S1_at   | TRIM25                        |
| GgaAffx.25763.1.S1_s_at | TRIM25                        |
| GgaAffx.25763.2.S1_at   | TRIM25                        |
| GgaAffx.25775.1.S1_at   | RCJMB04_3p2                   |
| GgaAffx.25776.1.S1_at   | NFYC                          |
| GgaAffx.25782.2.S1_at   | LOC427010                     |
| GgaAffx.25782.2.S1_s_at | ZFR                           |
| GgaAffx.25782.3.S1_s_at | LOC427010                     |

|                         |                         |
|-------------------------|-------------------------|
| GgaAffx.25796.1.S1_at   | PCDH24                  |
| GgaAffx.25800.1.S1_s_at | LOC776927               |
| GgaAffx.25800.5.S1_s_at | LOC424393 /// LOC776927 |
| GgaAffx.25810.1.S1_at   | CRTC1                   |
| GgaAffx.25810.2.S1_s_at | CRTC1                   |
| GgaAffx.25810.3.S1_s_at | CRTC1                   |
| GgaAffx.25811.1.S1_s_at | LZTR1                   |
| GgaAffx.25813.2.S1_s_at | RCJMB04_21i6            |
| GgaAffx.2583.1.S1_at    | ATOX1                   |
| GgaAffx.25830.1.S1_at   | KAT2A                   |
| GgaAffx.25833.1.S1_at   | DNAJC21                 |
| GgaAffx.25839.2.S1_s_at | RCJMB04_30k7            |
| GgaAffx.25854.1.S1_at   | DHX57 /// LOC429336     |
| GgaAffx.25857.1.S1_at   | IPO9                    |
| GgaAffx.25860.1.S1_at   | LOC428272               |
| GgaAffx.25864.1.S1_at   | MCM10                   |
| GgaAffx.25869.1.S1_at   | LOXL2                   |
| GgaAffx.25873.1.S1_at   | KLHL5                   |
| GgaAffx.25875.1.S1_s_at | ALDH9A1                 |
| GgaAffx.25879.1.S1_s_at | MAST3                   |
| GgaAffx.25881.1.S1_at   | PECAM1                  |
| GgaAffx.25881.1.S1_s_at | PECAM1 /// PECAM1       |
| GgaAffx.25884.1.S1_at   | ARRDC2                  |
| GgaAffx.25890.1.S1_at   | RCJMB04_20c20           |
| GgaAffx.25890.4.S1_s_at | RCJMB04_20c20           |
| GgaAffx.25896.1.S1_s_at | SLC1A3                  |
| GgaAffx.25899.1.S1_s_at | TRRAP                   |
| GgaAffx.25904.1.S1_s_at | RPGRIP1L                |
| GgaAffx.25906.1.S1_at   | TTF1                    |
| GgaAffx.25917.1.S1_s_at | MYST3                   |
| GgaAffx.25929.1.S1_at   | RBL2                    |
| GgaAffx.25933.3.S1_s_at | PITPNC1                 |
| GgaAffx.25937.3.S1_s_at | RCJMB04_9d3             |
| GgaAffx.25941.1.S1_at   | RNF145                  |
| GgaAffx.25948.2.S1_s_at | MACF1                   |
| GgaAffx.25950.1.S1_at   | HELZ                    |
| GgaAffx.25958.1.S1_at   | SOX30                   |
| GgaAffx.25960.1.S1_s_at | FBXO42                  |
| GgaAffx.25962.2.S1_s_at | TOX3                    |
| GgaAffx.25969.1.S1_at   | MREG                    |

|                         |                          |
|-------------------------|--------------------------|
| GgaAffx.25979.1.S1_s_at | BNIP2                    |
| GgaAffx.25985.1.S1_at   | OTUD7A                   |
| GgaAffx.26023.5.S1_s_at | KRT15                    |
| GgaAffx.26025.1.S1_at   | TRIT1                    |
| GgaAffx.26026.1.S1_at   | IFT81                    |
| GgaAffx.26037.1.S1_at   | P2RX7                    |
| GgaAffx.2604.3.S1_s_at  | SERINC3                  |
| GgaAffx.26045.1.S1_at   | ZNF423                   |
| GgaAffx.26046.1.S1_at   | XPR1                     |
| GgaAffx.26047.1.S1_s_at | PRDM12                   |
| GgaAffx.26061.1.S1_s_at | OCRL                     |
| GgaAffx.26062.1.S1_s_at | CHIR-B3 /// LOC770720    |
| GgaAffx.26064.1.S1_at   | MYPN                     |
| GgaAffx.26068.1.S1_at   | HNRNPH3                  |
| GgaAffx.26072.2.S1_s_at | TJP1                     |
| GgaAffx.26074.1.S1_at   | CCDC46                   |
| GgaAffx.26075.1.S1_s_at | RCJMB04_3e19 /// WDR82P1 |
| GgaAffx.26076.1.S1_at   | NEK8                     |
| GgaAffx.2608.1.S1_at    | MAD1L1                   |
| GgaAffx.26081.1.S1_s_at | RUFY2                    |
| GgaAffx.26081.2.S1_at   | RUFY2                    |
| GgaAffx.26090.1.S1_at   | LYPLA2P1                 |
| GgaAffx.26106.6.S1_s_at | JMJD2B                   |
| GgaAffx.26108.1.S1_at   | FAM81A                   |
| GgaAffx.2611.1.S1_at    | FBXL10                   |
| GgaAffx.2611.2.S1_s_at  | FBXL10                   |
| GgaAffx.26111.2.S1_s_at | CCAR1                    |
| GgaAffx.26128.1.S1_at   | GAA                      |
| GgaAffx.26129.1.S1_at   | FAM20A                   |
| GgaAffx.26133.1.S1_s_at | UGT1A1 /// UGT1A9        |
| GgaAffx.26139.2.S1_at   | LOC422990 /// PSMD13     |
| GgaAffx.26141.1.S1_s_at | HKDC1                    |
| GgaAffx.26156.1.S1_at   | VPS13D                   |
| GgaAffx.2616.1.S1_at    | LOC768647                |
| GgaAffx.26161.1.S1_at   | CGNL1                    |
| GgaAffx.26175.1.S1_at   | ABCA5                    |
| GgaAffx.26183.1.S1_at   | C7orf27                  |
| GgaAffx.26187.1.S1_s_at | WDR66                    |
| GgaAffx.26190.1.S1_at   | LOC417445                |
| GgaAffx.26195.1.S1_s_at | XPO1                     |



|                        |                                |
|------------------------|--------------------------------|
| GgaAfx.26199.2.S1_s_at | RCJMB04_13a9                   |
| GgaAfx.26203.1.S1_at   | SPECC1                         |
| GgaAfx.26205.1.S1_s_at | SLC39A11                       |
| GgaAfx.26210.1.A1_s_at | LOC770343                      |
| GgaAfx.26213.1.S1_at   | SHCBP1                         |
| GgaAfx.26220.2.S1_at   | SEMA3G                         |
| GgaAfx.26220.2.S1_s_at | SEMA3G                         |
| GgaAfx.26232.1.S1_at   | EFNB1                          |
| GgaAfx.26234.1.S1_s_at | KNTC1                          |
| GgaAfx.26236.1.S1_at   | STK38                          |
| GgaAfx.26244.4.S1_s_at | PPFIA1                         |
| GgaAfx.26246.1.S1_at   | SEPHS1                         |
| GgaAfx.26247.1.S1_at   | LRRC8A                         |
| GgaAfx.26254.1.S1_at   | FAAP100 /// NPLOC4             |
| GgaAfx.26256.1.S1_at   | RBM5                           |
| GgaAfx.26257.1.S1_at   | SLC45A1                        |
| GgaAfx.26262.1.S1_at   | LOC423006                      |
| GgaAfx.26265.1.S1_at   | ATXN2                          |
| GgaAfx.26265.2.S1_s_at | ATXN2                          |
| GgaAfx.26265.3.S1_s_at | ATXN2                          |
| GgaAfx.26266.1.S1_at   | RBM5                           |
| GgaAfx.26268.1.S1_at   | RNF216                         |
| GgaAfx.26278.1.S1_at   | PTCHD2                         |
| GgaAfx.26281.1.S1_s_at | ARFGEF2                        |
| GgaAfx.26281.3.S1_s_at | ARFGEF2                        |
| GgaAfx.26282.1.S1_at   | ZDHHC12                        |
| GgaAfx.26285.1.S1_at   | AKAP10                         |
| GgaAfx.26291.1.S1_at   | CCDC21                         |
| GgaAfx.26296.1.S1_at   | SLC7A9                         |
| GgaAfx.26305.1.S1_at   | OBSCN                          |
| GgaAfx.26327.1.S1_x_at | CHIR-AB3 /// LOC425309 /// LOC |
| GgaAfx.26344.1.S1_at   | ZNFX1                          |
| GgaAfx.26345.1.S1_at   | RASD1                          |
| GgaAfx.26355.1.S1_at   | SLC10A4                        |
| GgaAfx.26357.1.S1_at   | SLC6A1                         |
| GgaAfx.26357.2.S1_s_at | SLC6A1                         |
| GgaAfx.26361.2.S1_at   | GLRA4                          |
| GgaAfx.26363.1.A1_at   | VGLL4                          |
| GgaAfx.26365.1.S1_at   | C3orf31                        |
| GgaAfx.26372.1.S1_at   | KIAA0355                       |

|                        |                     |
|------------------------|---------------------|
| GgaAfx.26374.1.S1_at   | TIMP4               |
| GgaAfx.26375.1.S1_at   | DLG5                |
| GgaAfx.26383.1.S1_at   | LOC415969           |
| GgaAfx.26385.1.S1_s_at | RCJMB04_33h8        |
| GgaAfx.26395.1.S1_s_at | DEAF1               |
| GgaAfx.2640.1.S1_at    | NPAL3               |
| GgaAfx.26401.1.S1_at   | CEP152              |
| GgaAfx.26403.1.S1_at   | TPR                 |
| GgaAfx.26414.1.S1_s_at | CES1 /// LOC769704  |
| GgaAfx.26416.1.S1_at   | LOC416899           |
| GgaAfx.2642.1.A1_at    | CHST12              |
| GgaAfx.2642.1.S1_at    | CHST12              |
| GgaAfx.26426.1.S1_s_at | SCG2                |
| GgaAfx.26432.1.S1_s_at | COL11A1             |
| GgaAfx.26442.1.S1_s_at | CD72                |
| GgaAfx.26446.2.S1_s_at | GSTT1               |
| GgaAfx.26459.1.S1_s_at | USP54               |
| GgaAfx.26461.1.S1_at   | CDC14A              |
| GgaAfx.26461.2.S1_s_at | CDC14A              |
| GgaAfx.26462.1.A1_at   | GPR88               |
| GgaAfx.26463.1.S1_at   | ACPL2               |
| GgaAfx.26464.1.S1_at   | BRIP1               |
| GgaAfx.26476.1.S1_at   | DCP1A               |
| GgaAfx.26486.1.S1_at   | ZNF232              |
| GgaAfx.26489.1.S1_at   | POLR1E              |
| GgaAfx.26492.1.S1_s_at | AGL                 |
| GgaAfx.26498.1.S1_s_at | PDLIM1              |
| GgaAfx.26501.1.S1_s_at | OGT                 |
| GgaAfx.26502.1.S1_at   | FREM1               |
| GgaAfx.26505.1.S1_s_at | C3orf63             |
| GgaAfx.26508.2.S1_at   | TAF1                |
| GgaAfx.26508.2.S1_s_at | TAF1                |
| GgaAfx.26509.1.A1_at   | LOC771941           |
| GgaAfx.26509.1.S1_s_at | LOC771941 /// MLYCD |
| GgaAfx.26511.1.S1_s_at | MPZL1               |
| GgaAfx.26516.1.S1_at   | KIF9                |
| GgaAfx.26516.1.S1_s_at | KIF9                |
| GgaAfx.26527.1.S1_at   | TCOF1               |
| GgaAfx.26530.1.A1_at   | LOC424832           |
| GgaAfx.26530.1.S1_at   | LOC424832           |

|                        |                     |
|------------------------|---------------------|
| GgaAfx.26540.2.S1_s_at | LOC425155           |
| GgaAfx.26541.1.S1_at   | GFER                |
| GgaAfx.2655.1.S1_x_at  | COL13A1             |
| GgaAfx.2655.6.S1_at    | COL13A1             |
| GgaAfx.26560.1.S1_at   | ARHGAP29            |
| GgaAfx.26564.1.S1_at   | KSR1                |
| GgaAfx.26564.1.S1_s_at | KSR1                |
| GgaAfx.26564.2.S1_s_at | KSR1                |
| GgaAfx.26573.1.S1_at   | ZDHHC7              |
| GgaAfx.26579.1.S1_s_at | CSF1R               |
| GgaAfx.26586.1.S1_s_at | SLC7A3              |
| GgaAfx.26587.1.S1_at   | RCJMB04_1e1         |
| GgaAfx.26599.1.S1_s_at | LOC416916           |
| GgaAfx.26601.1.S1_s_at | ARFGAP1             |
| GgaAfx.26607.5.S1_s_at | ZNF143              |
| GgaAfx.26616.1.S1_s_at | DLG3                |
| GgaAfx.26624.6.S1_s_at | TRPM7               |
| GgaAfx.26629.2.S1_at   | KIAA0664            |
| GgaAfx.26630.1.S1_at   | TBC1D9B             |
| GgaAfx.26637.1.S1_at   | ERF                 |
| GgaAfx.26643.1.S1_at   | LRCH2               |
| GgaAfx.26643.2.S1_s_at | LRCH2               |
| GgaAfx.26643.4.S1_at   | LRCH2               |
| GgaAfx.26643.4.S1_s_at | LRCH2               |
| GgaAfx.26643.6.S1_at   | LRCH2               |
| GgaAfx.26644.1.S1_at   | WSCD1               |
| GgaAfx.26651.3.S1_at   | SCUBE2              |
| GgaAfx.26651.6.S1_s_at | SCUBE2              |
| GgaAfx.26653.1.S1_at   | ANUBL1              |
| GgaAfx.26656.1.S1_at   | SQSTM1              |
| GgaAfx.26656.2.S1_at   | SQSTM1              |
| GgaAfx.26666.1.S1_s_at | MYO1D               |
| GgaAfx.26668.2.S1_s_at | ST5                 |
| GgaAfx.26669.1.S1_s_at | MAML1               |
| GgaAfx.26670.1.S1_at   | SLC5A11             |
| GgaAfx.26671.1.S1_at   | EVI5                |
| GgaAfx.26671.1.S1_s_at | EVI5                |
| GgaAfx.26677.1.S1_at   | LOC423775           |
| GgaAfx.2668.1.S1_at    | PTDSS2              |
| GgaAfx.26683.1.S1_s_at | LOC777076 /// RUFY1 |

|                         |             |
|-------------------------|-------------|
| GgaAffx.26692.1.S1_at   | SLC13A5     |
| GgaAffx.26694.1.S1_at   | ADAMTS2     |
| GgaAffx.26697.2.S1_s_at | PRPF6       |
| GgaAffx.26702.1.S1_s_at | LOC422229   |
| GgaAffx.26704.1.S1_at   | ABHD7       |
| GgaAffx.26704.1.S1_s_at | ABHD7       |
| GgaAffx.26714.1.S1_s_at | RBBP6       |
| GgaAffx.26725.1.S1_at   | ZBTB46      |
| GgaAffx.26729.1.S1_s_at | TNRC6A      |
| GgaAffx.26737.1.S1_at   | PLEKHA7     |
| GgaAffx.26741.1.S1_s_at | ZNF644      |
| GgaAffx.2675.1.S1_at    | LOC424033   |
| GgaAffx.26752.1.S1_s_at | PIK3C2A     |
| GgaAffx.26766.1.S1_at   | TMEM32      |
| GgaAffx.2677.1.S1_at    | MYLK3       |
| GgaAffx.26771.1.S1_s_at | LIMA1       |
| GgaAffx.26772.1.S1_at   | LRRC8C      |
| GgaAffx.26774.2.S1_s_at | SLC9A6      |
| GgaAffx.26777.1.S1_s_at | TXNRD3      |
| GgaAffx.2684.1.S1_s_at  | FAT2        |
| GgaAffx.269.1.S1_at     | KLHL12      |
| GgaAffx.2690.1.S1_at    | RASAL2      |
| GgaAffx.2690.3.S1_s_at  | RASAL2      |
| GgaAffx.2698.4.S1_s_at  | ABCA8       |
| GgaAffx.2699.1.S1_s_at  | ABCA5       |
| GgaAffx.270.1.S1_at     | ERMP1       |
| GgaAffx.2700.1.S1_at    | MYLK3       |
| GgaAffx.2701.1.S1_at    | INPPL1      |
| GgaAffx.2710.1.S1_at    | WDR41       |
| GgaAffx.2714.2.S1_s_at  | CCDC109A    |
| GgaAffx.2732.1.S1_at    | LOC428824   |
| GgaAffx.2735.1.S1_s_at  | RCJMB04_3a3 |
| GgaAffx.2736.1.S1_at    | WNT11B      |
| GgaAffx.2744.1.S1_at    | LUZP2       |
| GgaAffx.2749.1.S1_at    | COR4        |
| GgaAffx.2750.1.S1_s_at  | RAB27A      |
| GgaAffx.2751.1.S1_at    | ARSB        |
| GgaAffx.2766.1.S1_s_at  | ASTN1       |
| GgaAffx.2767.1.A1_at    | PLEKHF1     |
| GgaAffx.2773.1.S1_at    | ZCCHC8      |

|                        |                     |
|------------------------|---------------------|
| GgaAffx.2785.1.S1_at   | CCDC137             |
| GgaAffx.2789.1.S1_at   | BHMT                |
| GgaAffx.2815.1.S1_at   | RBM22               |
| GgaAffx.2816.1.S1_s_at | TCTN1               |
| GgaAffx.2820.1.S1_at   | RCJMB04_19e2        |
| GgaAffx.2824.1.S1_s_at | KIAA1370            |
| GgaAffx.2824.2.S1_s_at | KIAA1370            |
| GgaAffx.2826.1.S1_at   | PHYHD1              |
| GgaAffx.2831.1.S1_at   | NDST1               |
| GgaAffx.2832.1.S1_s_at | NPLOC4              |
| GgaAffx.2853.1.S1_at   | RCJMB04_19e2        |
| GgaAffx.2862.1.S1_s_at | MTHFR               |
| GgaAffx.2862.3.S1_s_at | MTHFR               |
| GgaAffx.2867.1.S1_s_at | LOC428696           |
| GgaAffx.2874.5.S1_at   | LOC427547           |
| GgaAffx.2874.7.S1_s_at | LOC427547           |
| GgaAffx.2876.1.S1_at   | LOC772274 /// MYO5C |
| GgaAffx.2879.2.S1_at   | NMNAT2              |
| GgaAffx.288.1.S1_at    | DDX25               |
| GgaAffx.2884.1.S1_at   | FBXO2               |
| GgaAffx.2887.1.S1_at   | TRPV3               |
| GgaAffx.2890.1.S1_s_at | LOC416488           |
| GgaAffx.2893.1.S1_at   | ASPA                |
| GgaAffx.2903.1.A1_at   | GDPD2               |
| GgaAffx.2907.1.S1_at   | IVD                 |
| GgaAffx.2912.1.S1_s_at | NLE1                |
| GgaAffx.2918.1.S1_s_at | WDR34               |
| GgaAffx.2927.1.A1_at   | KCNJ12              |
| GgaAffx.2936.1.S1_at   | SLC7A10             |
| GgaAffx.2958.1.S1_at   | SCG3                |
| GgaAffx.2959.1.S1_x_at | LOC420363           |
| GgaAffx.2960.1.S1_s_at | C1QB                |
| GgaAffx.2968.1.S1_s_at | RCJMB04_13e7        |
| GgaAffx.2968.3.S1_s_at | SLC47A2             |
| GgaAffx.2975.1.S1_at   | DMXL2 /// LOC776238 |
| GgaAffx.2978.1.S1_at   | PLCB2               |
| GgaAffx.2978.2.S1_s_at | PLCB2               |
| GgaAffx.2978.3.S1_at   | PLCB2               |
| GgaAffx.2979.1.S1_at   | C12orf51            |
| GgaAffx.2984.1.S1_s_at | PHKA1               |

|                       |                         |
|-----------------------|-------------------------|
| GgaAfx.2985.1.S1_s_at | TRAFD1                  |
| GgaAfx.2986.1.S1_at   | C10orf56                |
| GgaAfx.2993.1.S1_at   | EPB42                   |
| GgaAfx.2993.5.S1_at   | LOC771136 /// TGM3      |
| GgaAfx.2993.7.S1_at   | LOC771136               |
| GgaAfx.3004.1.S1_at   | ATP2B2                  |
| GgaAfx.3009.1.S1_s_at | SEMA6D                  |
| GgaAfx.3022.1.S1_at   | PHACTR3                 |
| GgaAfx.3027.1.S1_at   | SLC6A11                 |
| GgaAfx.3028.1.S1_at   | SYCP2                   |
| GgaAfx.3035.1.S1_s_at | RCJMB04_4l2             |
| GgaAfx.3051.1.S1_at   | LOC415780               |
| GgaAfx.3052.1.S1_at   | LOC415780               |
| GgaAfx.3074.1.S1_at   | ATG7                    |
| GgaAfx.3074.1.S1_s_at | ATG7                    |
| GgaAfx.3077.1.S1_at   | RCJMB04_8b16            |
| GgaAfx.3077.1.S1_s_at | RCJMB04_8b16            |
| GgaAfx.3088.1.A1_at   | IRS1                    |
| GgaAfx.3094.1.S1_at   | LOC424802               |
| GgaAfx.3105.2.S1_s_at | TSEN2                   |
| GgaAfx.3109.1.S1_at   | C10orf11                |
| GgaAfx.311.1.S1_at    | PADI2                   |
| GgaAfx.3113.1.S1_at   | COMTD1                  |
| GgaAfx.3119.1.S1_at   | SHC4                    |
| GgaAfx.3119.2.S1_at   | SHC4                    |
| GgaAfx.3119.2.S1_s_at | SHC4                    |
| GgaAfx.3130.1.S1_at   | LOC415973               |
| GgaAfx.3132.1.S1_s_at | DHX30                   |
| GgaAfx.3134.1.S1_at   | RCJMB04_1f9             |
| GgaAfx.3145.1.S1_s_at | MYST4                   |
| GgaAfx.3147.1.S1_at   | TEX14                   |
| GgaAfx.318.1.S1_at    | FANCA                   |
| GgaAfx.3180.1.S1_s_at | C1orf27                 |
| GgaAfx.3180.2.S1_s_at | C1orf27                 |
| GgaAfx.3186.1.S1_at   | DRD4                    |
| GgaAfx.3192.1.S1_at   | C1orf26                 |
| GgaAfx.3196.1.S1_at   | FAM124B                 |
| GgaAfx.3200.1.S1_s_at | FBLN2                   |
| GgaAfx.3201.1.S1_at   | TAF4                    |
| GgaAfx.3202.2.S1_s_at | LOC416899 /// LOC768372 |

|                        |               |
|------------------------|---------------|
| GgaAffx.3206.1.S1_s_at | KIAA0913      |
| GgaAffx.3214.1.S1_at   | LOC425228     |
| GgaAffx.3235.1.S1_s_at | PHF2          |
| GgaAffx.3235.3.S1_s_at | PHF2          |
| GgaAffx.3236.1.S1_at   | GTPBP5        |
| GgaAffx.3241.1.S1_at   | LOC769184     |
| GgaAffx.3241.1.S1_x_at | LOC769184     |
| GgaAffx.3247.1.S1_at   | KIAA0423      |
| GgaAffx.325.7.S1_s_at  | KLHL12        |
| GgaAffx.3251.1.S1_s_at | LOC422804     |
| GgaAffx.3254.1.S1_at   | SYNPO2L       |
| GgaAffx.3255.1.S1_at   | WNK2          |
| GgaAffx.3255.1.S1_s_at | WNK2          |
| GgaAffx.3257.1.S1_at   | WNK2          |
| GgaAffx.3264.1.S1_at   | MOGAT1        |
| GgaAffx.3269.2.S1_s_at | ADCYAP1R1     |
| GgaAffx.327.1.S1_at    | UBXD5         |
| GgaAffx.3270.1.S1_at   | ADCYAP1R1     |
| GgaAffx.3275.1.S1_at   | USP54         |
| GgaAffx.3277.1.S1_at   | EXTL2         |
| GgaAffx.3282.1.S1_s_at | LOC428397     |
| GgaAffx.3282.3.S1_at   | LOC428397     |
| GgaAffx.3284.1.S1_at   | BICD2         |
| GgaAffx.3290.1.S1_at   | SPATA2L       |
| GgaAffx.3294.1.S1_at   | LOC423026     |
| GgaAffx.3295.1.S1_at   | LOC424816     |
| GgaAffx.3296.1.S1_at   | OLFML1        |
| GgaAffx.3297.1.S1_s_at | LMF1          |
| GgaAffx.3298.1.S1_s_at | SLC25A36      |
| GgaAffx.3299.1.S1_at   | TBX2 /// TBX4 |
| GgaAffx.3301.1.S1_at   | ZBTB47        |
| GgaAffx.3306.1.S1_s_at | KBTBD5        |
| GgaAffx.3306.2.S1_at   | KBTBD5        |
| GgaAffx.3306.3.S1_at   | KBTBD5        |
| GgaAffx.3307.1.S1_at   | PPFIBP2       |
| GgaAffx.331.2.S1_s_at  | SPIRE2        |
| GgaAffx.3310.1.S1_s_at | CA7           |
| GgaAffx.3321.1.S1_s_at | OVCH2         |
| GgaAffx.3345.1.S1_at   | C20orf151     |
| GgaAffx.335.1.S1_s_at  | SARS          |

|                        |                         |
|------------------------|-------------------------|
| GgaAffx.3350.1.S1_at   | USP32                   |
| GgaAffx.3352.1.S1_at   | RCJMB04_2p4             |
| GgaAffx.3366.1.S1_s_at | SORBS1                  |
| GgaAffx.3366.5.S1_at   | SORBS1                  |
| GgaAffx.3368.1.S1_at   | LOC772204               |
| GgaAffx.338.1.S1_at    | TNFRSF9                 |
| GgaAffx.338.2.S1_s_at  | TNFRSF9                 |
| GgaAffx.3387.1.S1_at   | LOC425324 /// LOC426333 |
| GgaAffx.3396.1.S1_at   | MRM1                    |
| GgaAffx.34.1.S1_at     | COPS5                   |
| GgaAffx.3404.1.S1_s_at | AATF                    |
| GgaAffx.3405.1.S1_at   | FREM1                   |
| GgaAffx.3407.1.S1_at   | FREM1                   |
| GgaAffx.3415.1.S1_at   | ZDHC21                  |
| GgaAffx.3419.1.S1_at   | CCDC66                  |
| GgaAffx.3431.1.S1_at   | HSD17B2                 |
| GgaAffx.3434.1.S1_s_at | AP1GBP1                 |
| GgaAffx.3437.2.S1_s_at | PTH1R                   |
| GgaAffx.3442.2.S1_s_at | ARHGEF3                 |
| GgaAffx.3443.1.S1_at   | LOC769642               |
| GgaAffx.345.1.S1_at    | LOC771297               |
| GgaAffx.3455.1.S1_at   | PIK3CB                  |
| GgaAffx.3464.1.S1_at   | APPL1                   |
| GgaAffx.3468.1.S1_at   | MYO18B                  |
| GgaAffx.3469.1.S1_at   | ITM2C                   |
| GgaAffx.3475.1.S1_at   | GPR55                   |
| GgaAffx.3477.1.A1_at   | GPR35                   |
| GgaAffx.3477.1.S1_at   | GPR35                   |
| GgaAffx.349.2.S1_s_at  | PER3                    |
| GgaAffx.349.3.S1_at    | PER3                    |
| GgaAffx.3490.1.S1_s_at | TBL3                    |
| GgaAffx.3505.1.S1_at   | NF1                     |
| GgaAffx.3510.1.S1_s_at | HPS4                    |
| GgaAffx.3513.1.S1_at   | DNHD2                   |
| GgaAffx.3518.1.S1_at   | OGFR                    |
| GgaAffx.3519.1.S1_at   | SLC44A3                 |
| GgaAffx.3525.1.S1_at   | F3                      |
| GgaAffx.3534.2.S1_s_at | TRPM2                   |
| GgaAffx.3542.1.S1_s_at | RCJMB04_2i22            |
| GgaAffx.3545.1.S1_at   | TSC2                    |



|                        |              |
|------------------------|--------------|
| GgaAffx.3547.1.S1_s_at | LOC422211    |
| GgaAffx.3553.2.A1_at   | LOC428402    |
| GgaAffx.3553.2.S1_at   | LOC428402    |
| GgaAffx.3561.1.S1_at   | LOC416914    |
| GgaAffx.3568.1.S1_at   | CRISPLD2     |
| GgaAffx.3574.1.S1_at   | RCJMB04_19f9 |
| GgaAffx.3582.1.S1_s_at | SQRDL        |
| GgaAffx.3582.2.S1_at   | SQRDL        |
| GgaAffx.3588.2.S1_at   | CELSR3       |
| GgaAffx.3595.5.S1_at   | SGSM2        |
| GgaAffx.3598.1.A1_at   | LOC428705    |
| GgaAffx.3603.1.S1_at   | LOC768665    |
| GgaAffx.3610.2.S1_s_at | BIRC7        |
| GgaAffx.3613.1.S1_at   | PKD2L1       |
| GgaAffx.3615.1.S1_at   | HMGXB3       |
| GgaAffx.3620.1.S1_at   | JPH3         |
| GgaAffx.3622.1.S1_at   | ABCG2        |
| GgaAffx.3622.2.S1_s_at | ABCG2        |
| GgaAffx.3623.1.S1_at   | ALOX5        |
| GgaAffx.3624.1.S1_at   | WDR40A       |
| GgaAffx.3635.1.S1_at   | LOC427400    |
| GgaAffx.3640.1.S1_at   | LOC772338    |
| GgaAffx.3644.4.S1_at   | KCNQ2        |
| GgaAffx.365.1.S1_at    | SOX13        |
| GgaAffx.3660.1.S1_at   | SRMS         |
| GgaAffx.3660.1.S1_x_at | SRMS         |
| GgaAffx.3663.1.S1_at   | HEXDC        |
| GgaAffx.3684.2.S1_at   | EEFSEC       |
| GgaAffx.3689.1.S1_at   | FAM69A       |
| GgaAffx.3690.1.S1_at   | PPYR1        |
| GgaAffx.3705.2.S1_s_at | HDC          |
| GgaAffx.3712.1.S1_s_at | DAK          |
| GgaAffx.3713.1.S1_s_at | SEC61A1      |
| GgaAffx.3716.1.S1_s_at | LCMT1        |
| GgaAffx.3719.1.S1_s_at | BTBD8        |
| GgaAffx.3719.3.S1_s_at | BTBD8        |
| GgaAffx.372.1.S1_at    | PTPN7        |
| GgaAffx.3720.1.S1_at   | GDF10        |
| GgaAffx.3726.1.S1_s_at | ABTB1        |
| GgaAffx.3729.3.S1_s_at | WHDC1        |

|                        |           |       |
|------------------------|-----------|-------|
| GgaAffx.373.1.S1_at    | PCNX      |       |
| GgaAffx.3730.1.S1_at   | BTBD8     |       |
| GgaAffx.3732.1.S1_at   | SAMD10    |       |
| GgaAffx.3734.1.S1_s_at | HOMER2    |       |
| GgaAffx.3741.1.S1_s_at | LOC422229 |       |
| GgaAffx.3750.1.S1_at   | AXUD1     |       |
| GgaAffx.3756.4.S1_s_at | PITPNM3   |       |
| GgaAffx.3765.1.S1_s_at | CDC7      |       |
| GgaAffx.377.1.S1_at    |           | 40970 |
| GgaAffx.3777.1.S1_s_at | ZBTB46    |       |
| GgaAffx.3779.1.S1_at   | TEKT1     |       |
| GgaAffx.3787.1.S1_at   | PALB2     |       |
| GgaAffx.3795.1.S1_at   | GPC3      |       |
| GgaAffx.3813.1.S1_at   | ZC3H18    |       |
| GgaAffx.3838.1.S1_at   | PLXNA1    |       |
| GgaAffx.3841.1.S1_at   | ENDOGL1   |       |
| GgaAffx.3847.1.S1_at   | HNRNPA0   |       |
| GgaAffx.3865.1.S1_at   | RHEB      |       |
| GgaAffx.3871.1.S1_at   | OTOG      |       |
| GgaAffx.3874.1.S1_at   | ACSF3     |       |
| GgaAffx.3883.1.S1_at   | MAP7D3    |       |
| GgaAffx.3887.1.S1_at   | KLF15     |       |
| GgaAffx.3892.1.S1_s_at | PGBD3     |       |
| GgaAffx.3894.1.S1_s_at | MAP7D3    |       |
| GgaAffx.3898.1.A1_at   | ESPNL     |       |
| GgaAffx.3906.1.S1_s_at | GALNS     |       |
| GgaAffx.3919.1.S1_s_at | JMJD5     |       |
| GgaAffx.3927.4.S1_s_at | LOC428958 |       |
| GgaAffx.3929.1.S1_at   | GPR112    |       |
| GgaAffx.3937.1.S1_at   | IL4R      |       |
| GgaAffx.3939.2.S1_s_at | DPP6      |       |
| GgaAffx.3941.1.S1_at   | IL21R     |       |
| GgaAffx.3948.2.S1_at   | CLCA2     |       |
| GgaAffx.3948.4.S1_s_at | LOC424523 |       |
| GgaAffx.3954.1.S1_at   | FAM38A    |       |
| GgaAffx.3956.1.S1_s_at | PAXIP1    |       |
| GgaAffx.396.1.S1_at    | ANKRD47   |       |
| GgaAffx.3985.1.S1_at   | KCTD5     |       |
| GgaAffx.3989.1.S1_at   | SLC6A6    |       |
| GgaAffx.3992.1.S1_s_at | PAK2      |       |

|                       |                |
|-----------------------|----------------|
| GgaAfx.3997.1.S1_s_at | ART1 /// ART7B |
| GgaAfx.3997.2.A1_at   | ART1           |
| GgaAfx.3997.2.S1_at   | ART1           |
| GgaAfx.4000.1.S1_at   | ARNT2          |
| GgaAfx.4004.2.S1_at   | C16orf45       |
| GgaAfx.4004.2.S1_s_at | C16orf45       |
| GgaAfx.4006.1.S1_at   | KCNQ1          |
| GgaAfx.401.1.S1_at    | PHF13          |
| GgaAfx.4011.1.S1_at   | TTLL9          |
| GgaAfx.4011.3.S1_s_at | TTLL9          |
| GgaAfx.4014.1.S1_at   | XKR7           |
| GgaAfx.4028.1.S1_at   | PLXNA4B        |
| GgaAfx.4030.2.S1_s_at | KIAA0430       |
| GgaAfx.4033.1.S1_at   | HTR7           |
| GgaAfx.4038.1.S1_s_at | RCJMB04_5h24   |
| GgaAfx.4044.1.S1_s_at | PTPRN2         |
| GgaAfx.4053.2.S1_at   | ZFAND6         |
| GgaAfx.407.4.S1_s_at  | HIVEP3         |
| GgaAfx.4076.1.S1_s_at | FAM62B         |
| GgaAfx.408.1.S1_at    | CIRH1A         |
| GgaAfx.4089.1.S1_s_at | UBASH3B        |
| GgaAfx.4108.1.S1_at   | RCJMB04_3m6    |
| GgaAfx.4109.1.S1_at   | LOC770392      |
| GgaAfx.411.1.S1_at    | COG8           |
| GgaAfx.4115.3.S1_s_at | ATP11C         |
| GgaAfx.4123.1.S1_at   | XKRX           |
| GgaAfx.4124.1.S1_at   | GRIK4          |
| GgaAfx.4128.1.S1_at   | ADORA2A        |
| GgaAfx.4130.1.S1_s_at | LIPH           |
| GgaAfx.4138.1.S1_s_at | ABCC1          |
| GgaAfx.4150.1.S1_at   | ARHGEF12       |
| GgaAfx.4161.1.S1_at   | BRSK2          |
| GgaAfx.4164.1.S1_at   | TADA3L         |
| GgaAfx.4176.3.S1_s_at | RAB36          |
| GgaAfx.4177.1.S1_at   | POU2F3         |
| GgaAfx.4195.1.S1_at   | TRIM29         |
| GgaAfx.420.1.S1_at    | RCJMB04_29f20  |
| GgaAfx.4203.1.S1_s_at | XYLT1          |
| GgaAfx.4203.2.S1_s_at | XYLT1          |
| GgaAfx.4208.1.S1_s_at | RCJMB04_22b21  |

|                       |              |
|-----------------------|--------------|
| GgaAfx.4209.1.S1_s_at | MCAM         |
| GgaAfx.4215.2.S1_at   | KIN          |
| GgaAfx.4217.2.S1_at   | PDZD3        |
| GgaAfx.4222.1.S1_at   | RCJMB04_1d17 |
| GgaAfx.4226.1.S1_at   | ABCG4        |
| GgaAfx.4227.1.S1_at   | SRPX2        |
| GgaAfx.4245.1.S1_at   | KLHL25       |
| GgaAfx.4264.2.S1_at   | LOC416959    |
| GgaAfx.4283.1.S1_at   | LOC771371    |
| GgaAfx.4294.1.S1_at   | SLCO3A1      |
| GgaAfx.4303.1.S1_at   | LOC415505    |
| GgaAfx.4305.1.S1_at   | TMC7         |
| GgaAfx.4314.1.S1_at   | LOC422075    |
| GgaAfx.4325.1.S1_at   | BAIAP2       |
| GgaAfx.4329.1.S1_s_at | MCM10        |
| GgaAfx.4331.2.S1_s_at | LOC416613    |
| GgaAfx.4332.1.A1_at   | CLDN22       |
| GgaAfx.4338.1.S1_at   | RCJMB04_33d2 |
| GgaAfx.4340.1.S1_at   | DUSP11       |
| GgaAfx.4341.1.S1_at   | DUSP11       |
| GgaAfx.4348.1.S1_at   | LOC423820    |
| GgaAfx.4352.1.S1_s_at | VWA3A        |
| GgaAfx.4353.1.S1_at   | LOC777252    |
| GgaAfx.4355.1.S1_at   | LOC416618    |
| GgaAfx.4361.4.S1_s_at | USP28        |
| GgaAfx.4368.2.S1_s_at | MCTP2        |
| GgaAfx.4379.1.S1_at   | TLR4         |
| GgaAfx.4384.1.S1_at   | RNF213       |
| GgaAfx.4387.1.S1_at   | ARRDC4       |
| GgaAfx.4389.1.S1_at   | LOC427509    |
| GgaAfx.4393.3.S1_s_at | LOC771298    |
| GgaAfx.4394.1.S1_at   | LOC416622    |
| GgaAfx.4397.1.S1_at   | LOC422082    |
| GgaAfx.4409.1.S1_at   | LOC428967    |
| GgaAfx.4411.2.S1_s_at | LRRC28       |
| GgaAfx.4428.1.S1_at   | ATP13A3      |
| GgaAfx.4428.2.S1_s_at | ATP13A3      |
| GgaAfx.4444.2.S1_s_at | KIAA0152     |
| GgaAfx.4456.1.S1_at   | LINS1        |
| GgaAfx.446.1.S1_at    | RNF207       |

|                        |                         |
|------------------------|-------------------------|
| GgaAffx.4460.3.S1_s_at | PARD3                   |
| GgaAffx.4463.1.S1_at   | AFF4                    |
| GgaAffx.4463.2.S1_s_at | AFF4                    |
| GgaAffx.4468.1.S1_at   | ACOX2                   |
| GgaAffx.4468.2.S1_s_at | ACOX2                   |
| GgaAffx.4480.1.S1_at   | CLEC16A                 |
| GgaAffx.4484.1.S1_at   | LOC427844               |
| GgaAffx.4487.1.S1_s_at | PGS1                    |
| GgaAffx.4487.3.S1_s_at | PGS1                    |
| GgaAffx.4490.1.S1_s_at | EPC1                    |
| GgaAffx.4497.3.S1_s_at | ATP13A4                 |
| GgaAffx.4506.2.S1_s_at | RAB3IL1                 |
| GgaAffx.4520.1.S1_s_at | KIF5B                   |
| GgaAffx.4524.1.S1_s_at | MSI1                    |
| GgaAffx.4528.1.S1_at   | PCSK6                   |
| GgaAffx.4531.1.S1_s_at | LOC769198               |
| GgaAffx.4536.1.S1_s_at | ARHGAP12                |
| GgaAffx.4549.1.S1_at   | ZNF438                  |
| GgaAffx.4554.1.S1_at   | LOC416638               |
| GgaAffx.4563.1.S1_at   | LOC428249               |
| GgaAffx.4569.1.S1_at   | LOC771141               |
| GgaAffx.4571.1.A1_at   | RCJMB04_2120            |
| GgaAffx.4573.1.S1_at   | LOC427511               |
| GgaAffx.4575.1.S1_at   | RCJMB04_2120            |
| GgaAffx.4580.1.S1_s_at | MED19                   |
| GgaAffx.4581.1.S1_at   | LOC424525               |
| GgaAffx.4584.1.S1_at   | RASL12                  |
| GgaAffx.4585.1.S1_at   | LOC422293               |
| GgaAffx.4587.1.S1_at   | LOC429557               |
| GgaAffx.460.1.S1_at    | STX12                   |
| GgaAffx.4601.1.S1_at   | SUDS3                   |
| GgaAffx.4606.2.S1_s_at | ABCC2                   |
| GgaAffx.4626.1.S1_at   | C20orf174               |
| GgaAffx.4634.4.S1_at   | MAGI1                   |
| GgaAffx.4635.1.A1_at   | LOC771647               |
| GgaAffx.4644.1.S1_at   | SSH1                    |
| GgaAffx.4644.2.S1_s_at | SSH1                    |
| GgaAffx.4650.1.S1_s_at | SELE                    |
| GgaAffx.4651.1.S1_at   | LOC420485               |
| GgaAffx.4652.2.S1_s_at | LOC769505 /// LOC769630 |

|                       |                         |
|-----------------------|-------------------------|
| GgaAfx.4655.1.S1_at   | TMEM8                   |
| GgaAfx.4661.1.S1_at   | LOC422301               |
| GgaAfx.4662.1.S1_at   | LOC422301               |
| GgaAfx.4665.1.S1_at   | CNNM1                   |
| GgaAfx.4666.1.S1_at   | LARS                    |
| GgaAfx.4666.1.S1_s_at | LARS                    |
| GgaAfx.4677.2.S1_s_at | MASTL                   |
| GgaAfx.4681.1.S1_at   | ITFG3                   |
| GgaAfx.4687.1.S1_at   | DENND4A                 |
| GgaAfx.4700.1.S1_s_at | ZFYVE27                 |
| GgaAfx.4703.1.S1_at   | ANKRD2                  |
| GgaAfx.471.1.S1_s_at  | LOC415660 /// LOC415663 |
| GgaAfx.4715.1.S1_at   | LOC428715               |
| GgaAfx.4717.1.S1_at   | LOC420491               |
| GgaAfx.4726.1.S1_s_at | KBTBD8                  |
| GgaAfx.4733.1.S1_at   | MTMR8                   |
| GgaAfx.4746.1.S1_at   | NAT15                   |
| GgaAfx.4748.1.S1_at   | ARHGEF9                 |
| GgaAfx.4754.2.S1_s_at | SLIT1                   |
| GgaAfx.4763.7.S1_s_at | CACNA1G                 |
| GgaAfx.4764.1.S1_at   | C20orf86                |
| GgaAfx.4768.3.S1_s_at | MEGF11                  |
| GgaAfx.4776.1.S1_s_at | MYO3A                   |
| GgaAfx.4777.1.S1_at   | TIPIN                   |
| GgaAfx.4789.1.S1_at   | C10orf63                |
| GgaAfx.4800.1.S1_s_at | MYO1B                   |
| GgaAfx.4802.1.S1_at   | NMUR1                   |
| GgaAfx.4816.3.S1_s_at | LOC427595               |
| GgaAfx.4817.1.S1_at   | PRODH                   |
| GgaAfx.4819.2.S1_at   | LOC422323               |
| GgaAfx.4820.1.S1_at   | LOC416090               |
| GgaAfx.4823.1.S1_at   | TMEM104                 |
| GgaAfx.4824.1.S1_s_at | PHLDB1                  |
| GgaAfx.4835.1.S1_at   | FBXO3                   |
| GgaAfx.4837.1.S1_s_at | KIAA1217                |
| GgaAfx.4840.2.S1_s_at | DIS3L2                  |
| GgaAfx.4846.4.S1_s_at | FOXP1                   |
| GgaAfx.4847.1.S1_at   | FADS6                   |
| GgaAfx.4848.1.S1_s_at | CBLN4                   |
| GgaAfx.4851.1.S1_at   | EIF4E3                  |

|                       |                         |
|-----------------------|-------------------------|
| GgaAfx.4864.1.S1_at   | SHQ1                    |
| GgaAfx.4867.1.S1_at   | ZDHC15                  |
| GgaAfx.4872.3.S1_s_at | LOC415641 /// LOC423151 |
| GgaAfx.4872.4.S1_s_at | LOC415641 /// LOC423151 |
| GgaAfx.488.1.S1_at    | KCNAB2                  |
| GgaAfx.4881.1.S1_at   | ALPI                    |
| GgaAfx.4891.2.S1_s_at | BTRC                    |
| GgaAfx.4894.1.S1_at   | LOC417007               |
| GgaAfx.4928.3.S1_s_at | BCDO2                   |
| GgaAfx.493.1.S1_s_at  | LOC420070               |
| GgaAfx.4936.3.S1_s_at | ECEL1                   |
| GgaAfx.4940.1.S1_s_at | LOC776539               |
| GgaAfx.4941.1.S1_at   | PAMR1                   |
| GgaAfx.4945.1.S1_at   | LDLRAD3                 |
| GgaAfx.4948.1.S1_at   | LDLRAD3                 |
| GgaAfx.4950.1.S1_at   | CHRND                   |
| GgaAfx.4955.1.S1_at   | LAMB1                   |
| GgaAfx.4956.1.S1_at   | CHRNA                   |
| GgaAfx.496.1.S1_at    | CAPN5                   |
| GgaAfx.4960.3.S1_at   | IQCH                    |
| GgaAfx.4973.1.S1_at   | TRAF6                   |
| GgaAfx.4973.2.S1_s_at | TRAF6                   |
| GgaAfx.4975.1.A1_at   | RAG1                    |
| GgaAfx.4975.1.S1_at   | RAG1                    |
| GgaAfx.4976.1.S1_at   | RAG2                    |
| GgaAfx.4982.1.S1_at   | NFATC2                  |
| GgaAfx.4984.2.S1_s_at | SLC26A3                 |
| GgaAfx.4985.1.S1_at   | C10orf112               |
| GgaAfx.4988.1.S1_at   | LOC424054               |
| GgaAfx.5009.1.S1_at   | RCJMB04_7p22            |
| GgaAfx.5013.1.S1_at   | C20orf175               |
| GgaAfx.5026.1.S1_at   | LIF                     |
| GgaAfx.5027.1.S1_at   | COG5                    |
| GgaAfx.503.1.S1_at    | CREG2                   |
| GgaAfx.5030.1.S1_at   | COG5                    |
| GgaAfx.5039.1.S1_at   | CORO2B                  |
| GgaAfx.5048.1.S1_s_at | PAK3                    |
| GgaAfx.5056.1.S1_at   | ASTL                    |
| GgaAfx.5077.1.S1_s_at | KIF23                   |
| GgaAfx.508.1.S1_at    | EYA3                    |

|                       |               |
|-----------------------|---------------|
| GgaAfx.5084.1.S1_at   | CCDC88A       |
| GgaAfx.5084.2.S1_s_at | CCDC88A       |
| GgaAfx.5084.3.S1_s_at | CCDC88A       |
| GgaAfx.5091.1.S1_at   | ATXN7L1       |
| GgaAfx.511.1.S1_at    | MYH13         |
| GgaAfx.5111.1.S1_at   | C10orf112     |
| GgaAfx.5114.1.S1_at   | SGOL2         |
| GgaAfx.5116.1.S1_at   | FBXO18        |
| GgaAfx.5126.1.S1_at   | TLR15         |
| GgaAfx.5144.1.S1_s_at | LOC424943     |
| GgaAfx.5146.1.S1_s_at | NT5C2         |
| GgaAfx.515.2.S1_s_at  | PIP5K1C       |
| GgaAfx.517.2.S1_s_at  | HYAL1         |
| GgaAfx.5185.2.S1_s_at | RCJMB04_28i17 |
| GgaAfx.5200.1.S1_at   | CFLAR         |
| GgaAfx.5200.2.S1_s_at | CFLAR         |
| GgaAfx.5207.1.S1_s_at | CDCA8         |
| GgaAfx.5217.1.S1_at   | IL5RA         |
| GgaAfx.5222.1.S1_at   | FAM26B        |
| GgaAfx.5224.1.S1_at   | FAM26A        |
| GgaAfx.5228.1.S1_at   | LOC416107     |
| GgaAfx.5229.1.S1_at   | LRCH4         |
| GgaAfx.5239.1.S1_at   | ITPR1         |
| GgaAfx.5245.1.S1_at   | OBFC1         |
| GgaAfx.5245.1.S1_s_at | OBFC1         |
| GgaAfx.5246.1.S1_at   | CASP10        |
| GgaAfx.5247.1.S1_at   | FGL2          |
| GgaAfx.5249.1.S1_at   | CAPN10        |
| GgaAfx.5249.2.S1_s_at | CAPN10        |
| GgaAfx.5251.1.S1_at   | PION          |
| GgaAfx.5255.1.S1_at   | LOC422353     |
| GgaAfx.5257.1.S1_at   | RSBN1L        |
| GgaAfx.5263.1.S1_at   | FES           |
| GgaAfx.5264.1.S1_at   | CASP18        |
| GgaAfx.5267.1.S1_at   | LMCD1         |
| GgaAfx.5278.1.S1_at   | LOC422353     |
| GgaAfx.5281.1.S1_s_at | C10orf78      |
| GgaAfx.5286.3.S1_s_at | HISPPD2A      |
| GgaAfx.5293.1.S1_at   | C20orf74      |
| GgaAfx.5294.1.S1_at   | VHL           |



|                       |               |
|-----------------------|---------------|
| GgaAfx.5297.1.S1_at   | RCJMB04_15j12 |
| GgaAfx.5299.1.S1_s_at | IRAK2         |
| GgaAfx.5303.1.A1_at   | KIAA1754      |
| GgaAfx.5306.3.S1_s_at | DVL3          |
| GgaAfx.5311.1.S1_at   | PFTK2         |
| GgaAfx.5316.1.S1_at   | CHST1         |
| GgaAfx.5323.2.S1_at   | DHX8          |
| GgaAfx.5323.3.S1_s_at | DHX8          |
| GgaAfx.5330.1.S1_at   | CDK3          |
| GgaAfx.5335.2.S1_s_at | PLXND1        |
| GgaAfx.5336.1.S1_at   | ALS2CR8       |
| GgaAfx.534.2.S1_s_at  | GUCY2F        |
| GgaAfx.5340.1.S1_at   | PLEKHM3       |
| GgaAfx.5352.3.S1_s_at | VPS18         |
| GgaAfx.5355.1.S1_at   | KLF7          |
| GgaAfx.5357.2.S1_at   | ALG3          |
| GgaAfx.5359.1.S1_at   | CPO           |
| GgaAfx.5362.2.S1_s_at | LOC417253     |
| GgaAfx.5365.1.S1_s_at | EIF4G1        |
| GgaAfx.5379.2.S1_at   | BRD1          |
| GgaAfx.5379.2.S1_s_at | BRD1          |
| GgaAfx.538.1.A1_at    | LRRC32        |
| GgaAfx.5380.1.S1_at   | PPP2R5D       |
| GgaAfx.5385.1.S1_at   | MDH1B         |
| GgaAfx.5385.2.S1_s_at | MDH1B         |
| GgaAfx.5387.1.S1_at   | MAL           |
| GgaAfx.5388.1.S1_s_at | INOC1         |
| GgaAfx.5390.1.S1_at   | SMNDC1        |
| GgaAfx.5394.1.S1_at   | NSUN6         |
| GgaAfx.5399.1.S1_at   | OIP5          |
| GgaAfx.54.1.S1_at     | KLHL5         |
| GgaAfx.5402.1.S1_at   | ADAM23        |
| GgaAfx.5404.1.S1_s_at | NUSAP1        |
| GgaAfx.5406.1.S1_at   | GPR1          |
| GgaAfx.5413.1.S1_at   | LOC771098     |
| GgaAfx.5413.1.S1_x_at | LOC771098     |
| GgaAfx.5416.2.S1_s_at | RTF1          |
| GgaAfx.5418.1.S1_at   | LOC771349     |
| GgaAfx.5419.1.A1_at   | LOC771361     |
| GgaAfx.5423.1.S1_at   | ZBTB33        |

|                        |               |
|------------------------|---------------|
| GgaAffx.5427.1.S1_at   | CUL9          |
| GgaAffx.5433.1.S1_at   | LOC771422     |
| GgaAffx.5453.1.S1_at   | MGA           |
| GgaAffx.5458.1.S1_at   | CTLA4         |
| GgaAffx.5467.1.S1_at   | RBM20         |
| GgaAffx.5472.1.S1_at   | SELO          |
| GgaAffx.5473.1.S1_at   | RAPH1         |
| GgaAffx.5474.1.S1_at   | WDR63         |
| GgaAffx.5477.1.S1_at   | TRABD         |
| GgaAffx.5482.2.S1_s_at | ZNF800        |
| GgaAffx.549.3.S1_at    | MAPK14        |
| GgaAffx.5492.1.S1_at   | C1QL3         |
| GgaAffx.5495.2.S1_s_at | JMJD7-PLA2G4B |
| GgaAffx.5499.1.S1_s_at | PNPLA7        |
| GgaAffx.5500.1.S1_at   | LOC420526     |
| GgaAffx.5501.1.S1_at   | C2orf13       |
| GgaAffx.5508.6.S1_s_at | MCF2L2        |
| GgaAffx.5512.1.S1_at   | LAMP3         |
| GgaAffx.5519.1.S1_at   | LOC421270     |
| GgaAffx.5529.1.S1_at   | GPAM          |
| GgaAffx.553.2.S1_s_at  | RASSF5        |
| GgaAffx.5539.1.S1_s_at | SLC1A4        |
| GgaAffx.5541.1.S1_at   | IDH1          |
| GgaAffx.5543.1.S1_at   | IQUB          |
| GgaAffx.5547.2.S1_at   | LOC771293     |
| GgaAffx.5548.1.S1_at   | RCJMB04_9o17  |
| GgaAffx.5549.1.S1_at   | ATP6AP1       |
| GgaAffx.555.1.S1_s_at  | PRKRIR        |
| GgaAffx.5556.1.S1_at   | HAO1          |
| GgaAffx.5560.1.S1_s_at | DNAJC10       |
| GgaAffx.5573.1.S1_s_at | PLCB1         |
| GgaAffx.5573.2.S1_s_at | PLCB1         |
| GgaAffx.5577.1.S1_at   | VTI1A         |
| GgaAffx.558.1.S1_s_at  | SLC26A8       |
| GgaAffx.5584.1.S1_at   | IL1RAPL2      |
| GgaAffx.5584.2.S1_s_at | IL1RAPL2      |
| GgaAffx.5585.1.S1_at   | LOC427775     |
| GgaAffx.5586.1.S1_at   | SYT4          |
| GgaAffx.5598.1.S1_at   | LRRC26        |
| GgaAffx.5600.1.S1_at   | EHBP1         |

|                       |               |
|-----------------------|---------------|
| GgaAfx.5604.2.S1_at   | PLCB4         |
| GgaAfx.5612.1.S1_at   | GIMAP1        |
| GgaAfx.5616.1.S1_at   | TMEM17        |
| GgaAfx.5617.1.S1_at   | PEX5L         |
| GgaAfx.562.1.S1_at    | RLF           |
| GgaAfx.5630.2.S1_s_at | SPTBN5        |
| GgaAfx.5630.6.S1_s_at | SPTBN5        |
| GgaAfx.5634.1.S1_s_at | FOXN2         |
| GgaAfx.5641.1.S1_s_at | FAM73A        |
| GgaAfx.5647.1.S1_at   | EXD3          |
| GgaAfx.5648.1.S1_at   | LOC428554     |
| GgaAfx.5653.2.S1_at   | PLA2G4F       |
| GgaAfx.5663.1.S1_at   | SMAD7         |
| GgaAfx.5667.1.S1_at   | LOC768788     |
| GgaAfx.5668.1.S1_at   | GNB4          |
| GgaAfx.5670.1.S1_at   | WNT16         |
| GgaAfx.5672.1.S1_at   | ZZZ3          |
| GgaAfx.5682.2.S1_s_at | STEAP4        |
| GgaAfx.5692.3.S1_s_at | RCJMB04_12b15 |
| GgaAfx.5695.1.S1_at   | PIGK          |
| GgaAfx.5704.1.S1_at   | LOC417291     |
| GgaAfx.5712.2.S1_s_at | TBC1D8B       |
| GgaAfx.5713.1.A1_at   | ANKRD9        |
| GgaAfx.5714.1.S1_at   | FUT7          |
| GgaAfx.5721.1.S1_at   | LYCAT         |
| GgaAfx.5725.3.S1_at   | ACTL6A        |
| GgaAfx.5729.1.S1_at   | CAPN13        |
| GgaAfx.5730.1.S1_at   | CAPN13        |
| GgaAfx.5734.2.S1_at   | GALNT14       |
| GgaAfx.5743.4.S1_at   | GTF2A1L       |
| GgaAfx.5743.4.S1_s_at | GTF2A1L       |
| GgaAfx.5745.1.S1_at   | TTN           |
| GgaAfx.575.1.S1_at    | MARVELD3      |
| GgaAfx.5758.1.S1_at   | TTN           |
| GgaAfx.5786.1.S1_at   | CDAN1         |
| GgaAfx.5788.1.S1_s_at | CDC42BPA      |
| GgaAfx.579.1.S1_s_at  | SRPK1         |
| GgaAfx.5791.1.S1_at   | LOC422394     |
| GgaAfx.5795.1.S1_at   | TRMT6         |
| GgaAfx.5808.1.S1_at   | C10orf96      |

|                       |                         |
|-----------------------|-------------------------|
| GgaAfx.5811.1.A1_x_at | LOC431318               |
| GgaAfx.5812.1.S1_at   | LOC416752               |
| GgaAfx.5816.1.S1_s_at | LOC770919               |
| GgaAfx.5818.1.S1_at   | LOC426835 /// LOC770105 |
| GgaAfx.5823.1.S1_s_at | AMDHD2                  |
| GgaAfx.5824.1.S1_at   | PNLIPRP3                |
| GgaAfx.5832.1.S1_s_at | PLD1                    |
| GgaAfx.5833.1.S1_at   | LOC423918               |
| GgaAfx.5835.1.S1_at   | TMEM62                  |
| GgaAfx.5841.1.S1_at   | RBM46                   |
| GgaAfx.5846.1.S1_s_at | LOC429837 /// SFMBT2    |
| GgaAfx.5847.1.A1_at   | NPY2R                   |
| GgaAfx.5850.1.S1_at   | DNAL1                   |
| GgaAfx.5852.1.S1_at   | RNPS1                   |
| GgaAfx.5856.1.S1_s_at | SLC18A2                 |
| GgaAfx.5859.1.S1_at   | PDZD8                   |
| GgaAfx.5862.1.S1_s_at | NUMB                    |
| GgaAfx.5869.1.S1_s_at | NVL                     |
| GgaAfx.5884.2.S1_at   | RBM25                   |
| GgaAfx.5884.3.S1_at   | RBM25                   |
| GgaAfx.5888.1.S1_at   | ZFYVE1                  |
| GgaAfx.5895.2.S1_at   | RCJMB04_3a1             |
| GgaAfx.5895.2.S1_s_at | RCJMB04_3a1             |
| GgaAfx.5911.2.S1_at   | WNT2                    |
| GgaAfx.5916.1.S1_at   | PHC3                    |
| GgaAfx.5916.2.S1_s_at | PHC3                    |
| GgaAfx.5923.1.S1_s_at | LRRC31                  |
| GgaAfx.5930.1.S1_at   | GRK5                    |
| GgaAfx.5936.1.S1_at   | SMOC1                   |
| GgaAfx.5947.1.S1_s_at | BAG3                    |
| GgaAfx.5949.1.S1_s_at | PPP1R3A                 |
| GgaAfx.5954.1.S1_at   | KIAA1822L               |
| GgaAfx.5958.1.A1_at   | PFN3                    |
| GgaAfx.5960.2.S1_s_at | LOC424998               |
| GgaAfx.5963.1.S1_at   | RCJMB04_7n4             |
| GgaAfx.5965.1.S1_at   | PPAPDC1A                |
| GgaAfx.5966.1.S1_at   | CDK6                    |
| GgaAfx.5967.1.S1_at   | SAMD9L                  |
| GgaAfx.5969.1.S1_at   | DOCK4                   |
| GgaAfx.5970.1.S1_at   | HEPACAM2                |

|                       |              |
|-----------------------|--------------|
| GgaAfx.5977.1.A1_at   | C14orf83     |
| GgaAfx.5983.1.S1_at   | ATE1         |
| GgaAfx.5987.1.S1_at   | PIGH         |
| GgaAfx.599.1.S1_at    | LOC776459    |
| GgaAfx.6002.2.S1_s_at | DYNC1I2      |
| GgaAfx.6003.1.S1_at   | PRICKLE1     |
| GgaAfx.6008.1.S1_at   | SPOCK3       |
| GgaAfx.6011.1.S1_s_at | ADAMTS20     |
| GgaAfx.6024.1.S1_at   | TMEM117      |
| GgaAfx.6026.1.S1_s_at | PEPCK-M      |
| GgaAfx.6031.4.S1_at   | MYO3B        |
| GgaAfx.6046.1.S1_at   | GPATCH2      |
| GgaAfx.605.5.S1_at    | NRG2         |
| GgaAfx.6052.1.S1_s_at | LOC422427    |
| GgaAfx.6053.1.A1_at   | COL1A2       |
| GgaAfx.6057.2.S1_s_at | RCJMB04_14m6 |
| GgaAfx.6062.1.A1_at   | USH2A        |
| GgaAfx.6062.1.S1_at   | USH2A        |
| GgaAfx.6064.1.S1_at   | USH2A        |
| GgaAfx.6065.1.S1_at   | LOC771944    |
| GgaAfx.6069.3.S1_at   | ARID2        |
| GgaAfx.6091.1.S1_at   | SART3        |
| GgaAfx.6093.1.S1_at   | KIAA0157     |
| GgaAfx.6110.1.S1_s_at | ARHGAP11A    |
| GgaAfx.6114.1.S1_at   | RASGRP1      |
| GgaAfx.6125.1.S1_at   | CENPF        |
| GgaAfx.6128.1.S1_at   | SLC7A11      |
| GgaAfx.6128.3.S1_at   | SLC7A11      |
| GgaAfx.6133.1.S1_at   | ELF2         |
| GgaAfx.6135.1.S1_at   | CENPF        |
| GgaAfx.6147.1.S1_at   | RPS6KC1      |
| GgaAfx.6154.1.S1_at   | FLVCR1       |
| GgaAfx.6156.1.S1_at   | NSL1         |
| GgaAfx.6162.1.S1_at   | LOC424161    |
| GgaAfx.6163.1.S1_at   | CLGN         |
| GgaAfx.6164.1.S1_at   | LOC422448    |
| GgaAfx.6169.1.S1_at   | TBK1         |
| GgaAfx.6171.1.S1_at   | FASTKD1      |
| GgaAfx.6177.1.S1_at   | GNS          |
| GgaAfx.6182.1.S1_at   | LOC421379    |

|                       |                         |
|-----------------------|-------------------------|
| GgaAfx.6185.1.S1_at   | LOC425522 /// LOC776113 |
| GgaAfx.6186.1.S1_at   | CCDC3                   |
| GgaAfx.6190.1.S1_at   | LEMD3                   |
| GgaAfx.6196.1.S1_at   | SERTAD4                 |
| GgaAfx.6197.1.S1_at   | SYT14                   |
| GgaAfx.6199.1.S1_at   | C1orf107                |
| GgaAfx.6199.1.S1_s_at | C1orf107                |
| GgaAfx.621.1.S1_at    | C1orf160                |
| GgaAfx.622.1.S1_at    | ESAM                    |
| GgaAfx.6223.1.S1_at   | KIAA1333                |
| GgaAfx.6228.1.S1_s_at | CYLD                    |
| GgaAfx.6233.1.S1_at   | KCNG3                   |
| GgaAfx.6236.1.S1_at   | LOC421394               |
| GgaAfx.6243.1.S1_s_at | THADA                   |
| GgaAfx.6243.3.S1_s_at | THADA                   |
| GgaAfx.625.1.S1_at    | LOC772366               |
| GgaAfx.6251.1.S1_at   | ABCG5                   |
| GgaAfx.6252.1.S1_at   | ABCG8                   |
| GgaAfx.626.1.A1_at    | PANX3                   |
| GgaAfx.627.1.S1_s_at  | NPHP4                   |
| GgaAfx.6271.1.S1_at   | ZNF827                  |
| GgaAfx.6274.1.S1_at   | SRBD1                   |
| GgaAfx.6275.1.S1_at   | SRBD1                   |
| GgaAfx.6276.1.S1_at   | ARHGAP5                 |
| GgaAfx.6282.1.S1_at   | KIAA0467                |
| GgaAfx.6286.1.S1_s_at | PRKCE                   |
| GgaAfx.6286.3.S1_s_at | PRKCE                   |
| GgaAfx.6287.1.S1_at   | LOC423317               |
| GgaAfx.6293.1.S1_at   | KIAA0467                |
| GgaAfx.6294.1.S1_at   | SOCS5                   |
| GgaAfx.6295.1.S1_at   | TMEM34                  |
| GgaAfx.6297.1.S1_at   | TTC7A                   |
| GgaAfx.630.1.S1_s_at  | C1orf174                |
| GgaAfx.6308.4.S1_s_at | PLB1                    |
| GgaAfx.6316.1.S1_at   | SUPT7L                  |
| GgaAfx.6328.1.S1_at   | DDI2                    |
| GgaAfx.634.1.S1_at    | LPO                     |
| GgaAfx.6369.2.S1_s_at | PLK3                    |
| GgaAfx.6384.2.S1_s_at | RCJMB04_13c10           |
| GgaAfx.6386.1.S1_at   | RNF8                    |

|                       |             |
|-----------------------|-------------|
| GgaAfx.6391.2.S1_s_at | ANKRD15     |
| GgaAfx.6392.1.S1_at   | DMRT3       |
| GgaAfx.6396.1.S1_at   | INTU        |
| GgaAfx.6397.1.S1_at   | LOC421438   |
| GgaAfx.640.1.S1_at    | TDRKH       |
| GgaAfx.6403.1.S1_at   | SLC29A1     |
| GgaAfx.6405.1.S1_at   | HSPA4L      |
| GgaAfx.6405.2.S1_s_at | HSPA4L      |
| GgaAfx.641.1.S1_at    | AP3D1       |
| GgaAfx.6410.1.S1_at   | ZNF410      |
| GgaAfx.6413.1.S1_s_at | LOC422497   |
| GgaAfx.6416.1.S1_at   | TRHDE       |
| GgaAfx.6416.2.S1_s_at | TRHDE       |
| GgaAfx.6418.2.S1_s_at | C4orf29     |
| GgaAfx.6425.1.S1_at   | LARP2       |
| GgaAfx.6433.3.S1_s_at | UROD        |
| GgaAfx.6437.1.S1_at   | GLIPR1L2    |
| GgaAfx.644.2.S1_s_at  | MAP2K4      |
| GgaAfx.6443.1.S1_s_at | ABCD4       |
| GgaAfx.645.1.S1_at    | MPO         |
| GgaAfx.6467.1.S1_s_at | ZDHHC17     |
| GgaAfx.6470.1.S1_at   | COL28A1     |
| GgaAfx.6475.1.S1_at   | E2F7        |
| GgaAfx.6478.1.S1_s_at | KIAA0317    |
| GgaAfx.65.1.S1_at     | FER1L5      |
| GgaAfx.6518.1.S1_at   | CNOT6L      |
| GgaAfx.6518.2.S1_s_at | CNOT6L      |
| GgaAfx.6519.1.S1_at   | TAS2R7      |
| GgaAfx.6526.1.S1_s_at | PIK3R3      |
| GgaAfx.6526.7.S1_s_at | PIK3R3      |
| GgaAfx.6528.2.S1_at   | LOC772154   |
| GgaAfx.653.1.S1_at    | DBF4B       |
| GgaAfx.6535.1.S1_s_at | POMGNT1     |
| GgaAfx.6545.4.S1_x_at | RCJMB04_n15 |
| GgaAfx.6552.5.S1_s_at | ESRRB       |
| GgaAfx.6562.1.S1_at   | GPR171      |
| GgaAfx.6566.1.S1_at   | MMRN1       |
| GgaAfx.6567.1.S1_at   | KIAA1737    |
| GgaAfx.6591.2.S1_s_at | ABCC10      |
| GgaAfx.660.1.S1_at    | GOLGA1      |

|                       |                        |
|-----------------------|------------------------|
| GgaAfx.662.1.S1_at    | LOC771115              |
| GgaAfx.6626.1.S1_s_at | PPP2R2D                |
| GgaAfx.6632.1.S1_at   | ALKBH1                 |
| GgaAfx.6638.1.A1_at   | PWWP2                  |
| GgaAfx.6647.1.S1_at   | LOC772154              |
| GgaAfx.6655.1.S1_at   | COL25A1                |
| GgaAfx.6656.1.S1_at   | LTBP1                  |
| GgaAfx.6665.1.S1_s_at | RCJMB04_1d5            |
| GgaAfx.6666.1.S1_s_at | YIPF4                  |
| GgaAfx.6671.1.S1_at   | ALOXE3 /// LOC429674   |
| GgaAfx.6675.3.S1_s_at | TBCKL                  |
| GgaAfx.6684.1.S1_s_at | GSTCD                  |
| GgaAfx.6685.1.S1_at   | GTF2A1                 |
| GgaAfx.6689.1.S1_at   | STON2                  |
| GgaAfx.6694.1.S1_at   | VIT                    |
| GgaAfx.6707.1.S1_at   | SULT6B1                |
| GgaAfx.6708.1.S1_at   | LRP2BP                 |
| GgaAfx.6712.1.S1_at   | PRKD3                  |
| GgaAfx.6712.2.S1_s_at | PRKD3                  |
| GgaAfx.6715.1.S1_s_at | PTPN21                 |
| GgaAfx.6720.3.S1_s_at | ZC3H14                 |
| GgaAfx.6720.5.S1_s_at | ZC3H14                 |
| GgaAfx.6727.2.S1_s_at | EML5                   |
| GgaAfx.6729.1.S1_at   | STOX2                  |
| GgaAfx.673.1.S1_s_at  | MAN1C1                 |
| GgaAfx.6735.1.S1_s_at | CDKN2AIP /// LOC422554 |
| GgaAfx.6738.1.S1_at   | TTC8                   |
| GgaAfx.6740.1.S1_s_at | FOXN3                  |
| GgaAfx.6757.1.S1_at   | LOC421495              |
| GgaAfx.6764.1.S1_at   | ZNF238                 |
| GgaAfx.6773.1.S1_at   | TMEM106B               |
| GgaAfx.6774.1.S1_at   | TMEM16H                |
| GgaAfx.6779.1.S1_s_at | RCJMB04_16f17          |
| GgaAfx.6783.2.S1_s_at | SMEK1                  |
| GgaAfx.6785.1.S1_at   | EXO1                   |
| GgaAfx.6789.1.S1_at   | WDR64                  |
| GgaAfx.6791.1.S1_at   | WDR64                  |
| GgaAfx.6796.1.S1_s_at | TRIP11                 |
| GgaAfx.6799.1.S1_s_at | FBXO8                  |
| GgaAfx.6802.1.S1_s_at | PIGM                   |



|                       |                      |
|-----------------------|----------------------|
| GgaAfx.681.3.S1_s_at  | MTMR4                |
| GgaAfx.6810.2.S1_s_at | CPSF2                |
| GgaAfx.6812.1.S1_at   | ACOT11               |
| GgaAfx.6816.2.S1_s_at | DGKB                 |
| GgaAfx.6821.1.S1_s_at | SLC24A4              |
| GgaAfx.6826.1.S1_at   | TMEM61               |
| GgaAfx.6834.4.S1_s_at | RYR2                 |
| GgaAfx.6835.1.S1_at   | USP24                |
| GgaAfx.6836.1.S1_at   | WDR17                |
| GgaAfx.6837.1.S1_at   | USP24                |
| GgaAfx.6839.1.S1_at   | AGR3                 |
| GgaAfx.6844.1.S1_at   | LOC429936            |
| GgaAfx.6847.2.S1_s_at | RCJMB04_27p10        |
| GgaAfx.6849.1.S1_at   | ERO1LB               |
| GgaAfx.6849.2.S1_s_at | ERO1LB               |
| GgaAfx.6855.1.S1_at   | KIAA1409             |
| GgaAfx.6859.1.S1_at   | MTHFD2L              |
| GgaAfx.6859.2.S1_s_at | MTHFD2L              |
| GgaAfx.6868.1.S1_at   | TACSTD2              |
| GgaAfx.6875.2.S1_at   | USO1                 |
| GgaAfx.6884.1.S1_at   | ANTXR2               |
| GgaAfx.6885.1.S1_at   | ANTXR2               |
| GgaAfx.6887.1.S1_at   | FGF5                 |
| GgaAfx.6890.1.S1_at   | TMEM161B             |
| GgaAfx.6896.1.S1_at   | LOC776184            |
| GgaAfx.6898.1.S1_at   | SP4                  |
| GgaAfx.6898.2.S1_s_at | SP4                  |
| GgaAfx.6916.1.S1_at   | B3GALT1              |
| GgaAfx.6931.1.S1_at   | GPNMB                |
| GgaAfx.6933.1.S1_s_at | C7orf30              |
| GgaAfx.6935.1.S1_at   | TTC21B               |
| GgaAfx.6936.1.S1_s_at | USP1                 |
| GgaAfx.6939.2.S1_s_at | PPFIA2               |
| GgaAfx.6945.1.S1_at   | SERPINA5             |
| GgaAfx.6948.1.S1_at   | TMTC2                |
| GgaAfx.6948.2.S1_s_at | TMTC2                |
| GgaAfx.6955.1.S1_s_at | MPP6                 |
| GgaAfx.6968.1.S1_s_at | OSBPL3               |
| GgaAfx.6970.1.S1_s_at | LOC771163            |
| GgaAfx.6975.1.S1_at   | LOC776434 /// PCNXL2 |

|                        |                               |
|------------------------|-------------------------------|
| GgaAffx.6978.1.S1_s_at | KLHL8                         |
| GgaAffx.6986.1.S1_at   | PRCP                          |
| GgaAffx.6995.1.S1_s_at | LOC424180 /// SCN1A /// SCN2A |
| GgaAffx.6995.2.S1_at   | SCN1A                         |
| GgaAffx.700.1.S1_at    | ACTRT2                        |
| GgaAffx.7006.1.S1_s_at | FIGN                          |
| GgaAffx.7016.1.S1_at   | C14orf49                      |
| GgaAffx.7026.1.S1_at   | C1orf96                       |
| GgaAffx.7034.1.S1_at   | TAF5L                         |
| GgaAffx.7038.2.S1_s_at | GALNT2                        |
| GgaAffx.7045.1.S1_at   | COG2                          |
| GgaAffx.7049.3.S1_s_at | WDR78                         |
| GgaAffx.7063.1.S1_at   | BCL11B                        |
| GgaAffx.7063.2.S1_s_at | BCL11B                        |
| GgaAffx.7065.1.S1_at   | THAP9                         |
| GgaAffx.7088.1.S1_at   | C12orf50                      |
| GgaAffx.7095.1.S1_at   | PDCD2                         |
| GgaAffx.7098.1.S1_at   | LOC422599                     |
| GgaAffx.7100.2.S1_s_at | CEP290                        |
| GgaAffx.7101.1.S1_s_at | CEP290                        |
| GgaAffx.7109.1.S1_s_at | EML1                          |
| GgaAffx.711.1.A1_at    | ST3GAL4                       |
| GgaAffx.7118.1.S1_s_at | COLQ                          |
| GgaAffx.7118.4.S1_at   | COLQ                          |
| GgaAffx.7120.1.S1_at   | HACL1                         |
| GgaAffx.7132.1.S1_at   | WDR25                         |
| GgaAffx.7149.1.S1_at   | PLCL2                         |
| GgaAffx.7161.1.S1_s_at | RCJMB04_1f4                   |
| GgaAffx.7162.1.S1_s_at | WDFY3                         |
| GgaAffx.7169.2.S1_at   | PPM1K                         |
| GgaAffx.7174.1.S1_at   | SGOL1                         |
| GgaAffx.7182.1.S1_at   | KIF25                         |
| GgaAffx.7188.1.S1_s_at | NGLY1                         |
| GgaAffx.7188.2.S1_s_at | NGLY1                         |
| GgaAffx.7188.3.S1_s_at | NGLY1                         |
| GgaAffx.7190.1.S1_s_at | PLXNC1                        |
| GgaAffx.7193.1.S1_at   | CCDC41                        |
| GgaAffx.7202.1.S1_at   | CRELD2                        |
| GgaAffx.7211.1.S1_at   | LOC421567                     |
| GgaAffx.7215.1.S1_at   | C1orf173                      |

|                       |           |
|-----------------------|-----------|
| GgaAfx.7220.1.S1_at   | WDR20     |
| GgaAfx.7221.1.S1_at   | C14orf131 |
| GgaAfx.7226.1.S1_at   | RNF25     |
| GgaAfx.7239.1.S1_s_at | ZNF142    |
| GgaAfx.7245.1.S1_at   | LOC421567 |
| GgaAfx.7251.1.S1_at   | CCR6      |
| GgaAfx.7257.1.S1_s_at | RBMS3     |
| GgaAfx.7261.2.S1_s_at | MFHAS1    |
| GgaAfx.7269.1.S1_at   | LOC417921 |
| GgaAfx.7275.3.S1_s_at | RPS6KA2   |
| GgaAfx.7278.1.S1_at   | SMARCAL1  |
| GgaAfx.7278.2.S1_at   | SMARCAL1  |
| GgaAfx.7278.2.S1_s_at | SMARCAL1  |
| GgaAfx.7282.1.S1_at   | GPD1L     |
| GgaAfx.7286.1.S1_s_at | PECR      |
| GgaAfx.7307.1.S1_at   | CYP27C1   |
| GgaAfx.7309.1.S1_at   | NOD1      |
| GgaAfx.7313.1.S1_at   | LOC419095 |
| GgaAfx.732.1.S1_at    | MEX3D     |
| GgaAfx.7320.1.S1_at   | CAPN7     |
| GgaAfx.7330.2.S1_s_at | SCYL2     |
| GgaAfx.7334.1.S1_s_at | PIK3R4    |
| GgaAfx.7345.1.S1_at   | ATP2C1    |
| GgaAfx.7345.3.S1_s_at | ATP2C1    |
| GgaAfx.7353.2.S1_s_at | SLC17A8   |
| GgaAfx.7353.6.S1_s_at | SLC17A8   |
| GgaAfx.7355.1.S1_at   | SPOP      |
| GgaAfx.736.3.S1_s_at  | TYW1      |
| GgaAfx.7375.2.S1_s_at | SLC4A4    |
| GgaAfx.7380.1.S1_s_at | CPNE4     |
| GgaAfx.7391.2.S1_s_at | NPFFR2    |
| GgaAfx.7394.1.S1_at   | ADAMTS3   |
| GgaAfx.7395.1.S1_at   | PNLDC1    |
| GgaAfx.7403.1.S1_at   | SLC5A8    |
| GgaAfx.7403.2.S1_s_at | SLC5A8    |
| GgaAfx.7407.1.S1_s_at | TFCP2L1   |
| GgaAfx.7409.1.S1_at   | UTP20     |
| GgaAfx.7415.1.S1_s_at | KIAA0284  |
| GgaAfx.7416.1.S1_at   | PLD4      |
| GgaAfx.7420.1.S1_at   | PLD4      |

|                       |                                 |       |
|-----------------------|---------------------------------|-------|
| GgaAfx.7423.1.S1_at   | ATG9A                           |       |
| GgaAfx.7428.2.S1_s_at | ACPP                            |       |
| GgaAfx.7431.1.S1_at   | NUP205                          |       |
| GgaAfx.7438.1.A1_at   | STX11                           |       |
| GgaAfx.7438.1.S1_at   | STX11                           |       |
| GgaAfx.7445.1.S1_at   | CSTF3                           |       |
| GgaAfx.7458.1.S1_at   | CCDC14                          |       |
| GgaAfx.746.3.S1_at    | DNAH9                           |       |
| GgaAfx.7466.1.A1_at   | CCR2                            |       |
| GgaAfx.7468.1.A1_at   | XCR1                            |       |
| GgaAfx.7468.1.S1_at   | XCR1                            |       |
| GgaAfx.7469.1.S1_at   | FYCO1                           |       |
| GgaAfx.7470.1.S1_at   | FYCO1                           |       |
| GgaAfx.7472.1.A1_at   | LOC769813                       |       |
| GgaAfx.7493.1.S1_s_at | UGT2A3                          |       |
| GgaAfx.7508.1.S1_at   | SGPP1                           |       |
| GgaAfx.7514.1.S1_at   | SPATA5                          |       |
| GgaAfx.7522.1.S1_at   | GUCY2C                          |       |
| GgaAfx.7522.1.S1_s_at | GUCY2C                          |       |
| GgaAfx.7538.1.S1_at   | KIAA1109                        |       |
| GgaAfx.7539.1.S1_at   | KIAA1109                        |       |
| GgaAfx.7543.1.S1_at   | KIAA1109                        |       |
| GgaAfx.7556.1.S1_at   | CDCP1                           |       |
| GgaAfx.7559.1.S1_s_at | PRKCH                           |       |
| GgaAfx.7561.1.S1_at   | SLC38A6                         |       |
| GgaAfx.7563.1.S1_at   | ULK4                            |       |
| GgaAfx.7570.1.S1_s_at |                                 | 41155 |
| GgaAfx.7575.1.S1_at   | MEI1                            |       |
| GgaAfx.7577.1.S1_at   | LOC425756                       |       |
| GgaAfx.7588.1.S1_at   | SLC25A38                        |       |
| GgaAfx.7589.1.A1_at   | CX3CR1                          |       |
| GgaAfx.7589.1.S1_at   | CX3CR1                          |       |
| GgaAfx.7590.1.S1_at   | TNIP3                           |       |
| GgaAfx.7591.1.S1_at   | TOB2                            |       |
| GgaAfx.7592.1.S1_at   | CCR4                            |       |
| GgaAfx.7593.1.S1_at   | TNIP3                           |       |
| GgaAfx.7600.1.S1_at   | LOC429569 /// LOC776078 /// PCI |       |
| GgaAfx.761.1.S1_at    | GPR114                          |       |
| GgaAfx.7611.2.S1_at   | CLASP2                          |       |
| GgaAfx.7629.1.S1_s_at | MKL1                            |       |

|                        |              |
|------------------------|--------------|
| GgaAffx.7631.1.S1_at   | QSER1        |
| GgaAffx.7635.1.S1_s_at | RCJMB04_23o7 |
| GgaAffx.7637.1.S1_at   | LARP7        |
| GgaAffx.7642.1.S1_at   | DCLK3        |
| GgaAffx.7644.1.S1_at   | GRAP2        |
| GgaAffx.7645.1.S1_s_at | LBA1         |
| GgaAffx.7654.1.S1_s_at | LOC424265    |
| GgaAffx.7654.2.S1_s_at | PARP14       |
| GgaAffx.7657.1.A1_at   | TIFA         |
| GgaAffx.7657.1.S1_at   | TIFA         |
| GgaAffx.7658.1.S1_at   | PARP9        |
| GgaAffx.7663.1.S1_at   | C4orf16      |
| GgaAffx.7663.2.S1_s_at | C4orf16      |
| GgaAffx.7665.1.S1_at   | GPR141       |
| GgaAffx.7666.1.S1_at   | LOC422694    |
| GgaAffx.7671.2.S1_at   | FAM62C       |
| GgaAffx.7671.3.S1_s_at | FAM62C       |
| GgaAffx.7673.1.S1_at   | CCDC73       |
| GgaAffx.7674.1.S1_at   | AOAH         |
| GgaAffx.7682.1.S1_at   | EN1          |
| GgaAffx.7693.2.S1_at   | ELP4         |
| GgaAffx.7704.1.S1_at   | HERPUD2      |
| GgaAffx.7717.1.S1_at   | RCJMB04_3l24 |
| GgaAffx.7727.2.S1_s_at | BBS9         |
| GgaAffx.7730.2.S1_s_at | ACMSD        |
| GgaAffx.7741.1.S1_s_at | ZRANB3       |
| GgaAffx.7745.3.S1_s_at | PDE1C        |
| GgaAffx.7751.1.S1_at   | C14orf104    |
| GgaAffx.7759.1.S1_at   | UTRN         |
| GgaAffx.776.2.S1_s_at  | WBSCR16      |
| GgaAffx.7763.1.A1_at   | LOC770975    |
| GgaAffx.7766.2.S1_s_at | GOLGA4       |
| GgaAffx.7775.1.S1_at   | TMEM184B     |
| GgaAffx.7781.1.S1_s_at | L2HGDH       |
| GgaAffx.7782.1.S1_at   | SHPRH        |
| GgaAffx.7787.1.S1_at   | CDKL1        |
| GgaAffx.7796.1.S1_s_at | SLC39A8      |
| GgaAffx.7799.2.S1_s_at | C6orf103     |
| GgaAffx.7801.1.S1_at   | C6orf103     |
| GgaAffx.7802.1.S1_at   | MAP4K5       |

|                        |           |
|------------------------|-----------|
| GgaAffx.7805.2.S1_s_at | C7orf10   |
| GgaAffx.7814.1.S1_at   | UST       |
| GgaAffx.7819.1.S1_s_at | HECW1     |
| GgaAffx.7819.3.S1_s_at | HECW1     |
| GgaAffx.7822.1.S1_at   | TDRD7     |
| GgaAffx.7823.1.S1_s_at | STK17A    |
| GgaAffx.7832.2.S1_s_at | FRMD6     |
| GgaAffx.7834.1.S1_at   | NXPH2     |
| GgaAffx.7836.1.S1_at   | LOC424300 |
| GgaAffx.7851.2.S1_s_at | NID2      |
| GgaAffx.7854.1.S1_at   | GPR137C   |
| GgaAffx.7866.8.S1_s_at | LRP1B     |
| GgaAffx.787.1.S1_s_at  | DBR1      |
| GgaAffx.7876.7.S1_at   | MTHFD1L   |
| GgaAffx.7879.1.S1_at   | LOC418038 |
| GgaAffx.7885.1.S1_at   | DDHD1     |
| GgaAffx.7898.1.S1_at   | ELFN2     |
| GgaAffx.7901.1.S1_at   | C14orf106 |
| GgaAffx.7903.1.S1_s_at | EPC2      |
| GgaAffx.7908.1.S1_at   | EIF2B4    |
| GgaAffx.7909.1.S1_at   | TMPRSS6   |
| GgaAffx.7916.1.S1_at   | RBM43     |
| GgaAffx.7919.2.S1_at   | TMPRSS6   |
| GgaAffx.7928.1.S1_s_at | SLC12A7   |
| GgaAffx.7930.2.S1_at   | CD1C      |
| GgaAffx.7936.1.S1_at   | BRD9      |
| GgaAffx.7939.2.S1_at   | SLC9A3    |
| GgaAffx.7949.1.S1_s_at | FMNL2     |
| GgaAffx.7951.1.S1_at   | COL15A1   |
| GgaAffx.7957.1.S1_at   | NR4A2     |
| GgaAffx.797.1.S1_at    | C16orf48  |
| GgaAffx.7983.1.S1_s_at | TLE1      |
| GgaAffx.7989.1.S1_at   |           |
| GgaAffx.7992.1.S1_at   | SLC28A3   |
| GgaAffx.7993.1.S1_at   | AGTPBP1   |
| GgaAffx.800.1.S1_s_at  | PLCH2     |
| GgaAffx.8002.1.S1_at   | C22orf28  |
| GgaAffx.8007.1.S1_at   | FANCC     |
| GgaAffx.8009.1.S1_at   | RECK      |
| GgaAffx.801.1.S1_at    | TP53INP2  |

|                       |               |       |
|-----------------------|---------------|-------|
| GgaAfx.8014.1.S1_at   | RIC8B         |       |
| GgaAfx.8019.1.S1_s_at | ATP9B         |       |
| GgaAfx.8023.1.S1_s_at | ALDH5A1       |       |
| GgaAfx.8023.3.S1_at   | ALDH5A1       |       |
| GgaAfx.8024.1.S1_at   | LOC771624     |       |
| GgaAfx.8027.1.S1_at   | LOC420821     |       |
| GgaAfx.8037.1.S1_s_at | KIF13A        |       |
| GgaAfx.8040.1.S1_s_at | ALDH1L2       |       |
| GgaAfx.8041.1.S1_at   | C12orf45      |       |
| GgaAfx.8042.1.S1_at   | RANBP9        |       |
| GgaAfx.8042.1.S1_s_at | RANBP9        |       |
| GgaAfx.8049.3.S1_s_at | CCDC90A       |       |
| GgaAfx.8055.1.S1_s_at | RCJMB04_19j20 |       |
| GgaAfx.8069.1.S1_s_at | NT5DC3        |       |
| GgaAfx.8072.2.S1_s_at | HIVEP1        |       |
| GgaAfx.8079.1.S1_at   | ADAM12        |       |
| GgaAfx.8092.1.S1_s_at | C12orf48      |       |
| GgaAfx.8095.1.S1_at   | GNPTAB        |       |
| GgaAfx.8097.1.S1_at   | SYCP3         |       |
| GgaAfx.8101.3.S1_at   | LOC428479     |       |
| GgaAfx.8107.1.S1_s_at | UBR4          |       |
| GgaAfx.8109.1.S1_at   | PARP12        |       |
| GgaAfx.8112.3.S1_s_at | TBXAS1        |       |
| GgaAfx.8115.3.S1_at   | ATP6V0A4      |       |
| GgaAfx.8118.1.S1_s_at | SVOPL         |       |
| GgaAfx.8122.1.S1_at   | C6orf85       |       |
| GgaAfx.8129.1.S1_at   | EXOC2         |       |
| GgaAfx.8131.1.S1_s_at | LOC418108     |       |
| GgaAfx.8143.1.S1_s_at | ADCK2         |       |
| GgaAfx.8144.1.S1_at   | SERPINB1      |       |
| GgaAfx.8148.1.S1_at   | SERPINB5      |       |
| GgaAfx.8156.1.S1_at   | LOC429942     |       |
| GgaAfx.8182.2.S1_s_at | FGD4          |       |
| GgaAfx.8201.1.S1_s_at |               | 40979 |
| GgaAfx.8202.1.S1_at   | RCJMB04_12m23 |       |
| GgaAfx.8211.1.S1_s_at | WASH2P        |       |
| GgaAfx.8215.1.S1_at   | C6orf98       |       |
| GgaAfx.8228.8.S1_at   | SLC6A13       |       |
| GgaAfx.8232.1.S1_s_at | WNK1          |       |
| GgaAfx.8244.1.S1_at   | ANKRD33B      |       |

|                       |                      |
|-----------------------|----------------------|
| GgaAfx.8261.1.S1_at   | IL17RA               |
| GgaAfx.8268.1.S1_at   | SBK2                 |
| GgaAfx.8270.1.S1_at   | CCT5                 |
| GgaAfx.8273.1.S1_at   | LOC425916            |
| GgaAfx.8273.1.S1_x_at | LOC425916            |
| GgaAfx.830.1.S1_at    | LOC426958            |
| GgaAfx.8301.1.S1_at   | LOC420943            |
| GgaAfx.8311.1.S1_s_at | FIGNL1               |
| GgaAfx.8313.1.S1_s_at | EPS8                 |
| GgaAfx.8317.2.S1_s_at | DDC                  |
| GgaAfx.8318.1.S1_at   | CHD2                 |
| GgaAfx.8324.1.S1_s_at | GRB10                |
| GgaAfx.8324.2.S1_at   | GRB10                |
| GgaAfx.8327.4.S1_s_at | TRIM27.2             |
| GgaAfx.8335.1.S1_at   | PIK3C2G              |
| GgaAfx.8337.1.S1_s_at | PLCZ1                |
| GgaAfx.8339.1.A1_at   | CAPZA3               |
| GgaAfx.8349.1.S1_at   | C18orf37             |
| GgaAfx.8350.1.S1_at   | C9orf5               |
| GgaAfx.8356.1.S1_s_at | MOCOS                |
| GgaAfx.8358.1.S1_s_at | TUBGCP6              |
| GgaAfx.8374.1.S1_s_at | SLCO1A2              |
| GgaAfx.8389.2.S1_s_at | SLC6A19              |
| GgaAfx.8389.7.S1_at   | SLC6A19              |
| GgaAfx.8393.2.S1_at   | GRAMD4 /// LOC425953 |
| GgaAfx.8393.3.S1_s_at | GRAMD4 /// LOC425953 |
| GgaAfx.8405.1.S1_at   | GABBR2               |
| GgaAfx.8409.1.S1_at   | CENPE                |
| GgaAfx.8414.2.S1_s_at | C3AR1                |
| GgaAfx.8419.5.S1_s_at | LOC431192            |
| GgaAfx.8421.1.S1_at   | LOC427933            |
| GgaAfx.8426.1.S1_s_at | RCJMB04_4o20         |
| GgaAfx.8442.1.S1_at   | LOC425987            |
| GgaAfx.845.1.S1_s_at  | MAP2K2               |
| GgaAfx.8456.1.S1_at   | CEP152               |
| GgaAfx.8463.1.S1_at   | DMXL2 /// LOC776238  |
| GgaAfx.8477.2.S1_s_at | SLC5A12              |
| GgaAfx.8480.1.S1_at   | GMIP                 |
| GgaAfx.8481.1.S1_at   | GMIP                 |
| GgaAfx.8485.1.S1_at   | SECISBP2L            |



|                       |                                 |
|-----------------------|---------------------------------|
| GgaAfx.8485.2.S1_s_at | SECISBP2L                       |
| GgaAfx.8487.1.S1_at   | LOC425493 /// LOC425497 /// LOC |
| GgaAfx.8497.1.S1_at   | OTUD7B                          |
| GgaAfx.851.1.S1_at    | PDCL                            |
| GgaAfx.8518.1.S1_at   | LMBRD2                          |
| GgaAfx.8524.2.S1_s_at | LOC430516                       |
| GgaAfx.8525.3.S1_s_at | IDE                             |
| GgaAfx.8525.8.S1_s_at | IDE                             |
| GgaAfx.8530.1.S1_at   | LOC772153                       |
| GgaAfx.8541.1.S1_at   | C9orf98                         |
| GgaAfx.8547.1.S1_at   | LOC425235 /// LOC429547 /// LOC |
| GgaAfx.855.1.S1_at    | STAG1                           |
| GgaAfx.8553.3.S1_at   | PBX4                            |
| GgaAfx.8554.1.S1_x_at | LOC396003                       |
| GgaAfx.8558.1.S1_s_at | SORBS2                          |
| GgaAfx.8560.1.S1_at   | LOC420992                       |
| GgaAfx.8568.1.S1_at   | PARD3B                          |
| GgaAfx.8571.1.S1_at   | PARD3B                          |
| GgaAfx.8574.1.S1_at   | TXNDC4                          |
| GgaAfx.8577.1.S1_s_at | PLEKHO1                         |
| GgaAfx.8585.3.S1_s_at | TLR3                            |
| GgaAfx.8586.1.S1_s_at | LOC416322                       |
| GgaAfx.8586.3.S1_s_at | LOC416322                       |
| GgaAfx.8588.1.S1_at   | S100A13                         |
| GgaAfx.859.1.S1_at    | CLIP2                           |
| GgaAfx.8591.1.S1_at   | CCDC82                          |
| GgaAfx.8595.2.S1_s_at | CENPN                           |
| GgaAfx.8602.2.S1_s_at | CASC3                           |
| GgaAfx.8616.1.S1_x_at | LOC429920 /// LOC429942 /// LOC |
| GgaAfx.8628.1.S1_at   | GZMK                            |
| GgaAfx.8631.1.S1_at   | CDC20B                          |
| GgaAfx.8637.1.S1_at   | LOC769442                       |
| GgaAfx.8649.1.S1_s_at | F11                             |
| GgaAfx.8655.1.S1_s_at | FAT                             |
| GgaAfx.866.1.S1_at    | CLIP2                           |
| GgaAfx.8661.1.S1_at   | FRG1                            |
| GgaAfx.8667.1.S1_at   | C6orf98                         |
| GgaAfx.8668.1.S1_at   | MYCT1                           |
| GgaAfx.8673.1.S1_at   | LOC421644                       |
| GgaAfx.8681.1.S1_s_at | CNKSR3                          |

|                        |                               |
|------------------------|-------------------------------|
| GgaAffx.8685.1.S1_s_at | C6orf62                       |
| GgaAffx.8691.1.S1_at   | PNKD                          |
| GgaAffx.8692.1.A1_at   | CLDN20                        |
| GgaAffx.8698.2.S1_s_at | ZNF236                        |
| GgaAffx.8698.3.S1_s_at | ZNF236                        |
| GgaAffx.8698.4.S1_s_at | ZNF236                        |
| GgaAffx.8699.1.S1_at   | CLEC2B /// CLEC2D /// LOC4170 |
| GgaAffx.870.1.S1_s_at  | RCJMB04_8m14                  |
| GgaAffx.8701.1.S1_s_at | NOX3                          |
| GgaAffx.8715.1.S1_s_at | C10orf137                     |
| GgaAffx.8716.1.S1_s_at | C10orf137                     |
| GgaAffx.8719.1.S1_at   | DLC1                          |
| GgaAffx.8720.1.S1_at   | LOC771735                     |
| GgaAffx.8722.1.S1_at   | ZDHHC14                       |
| GgaAffx.8722.1.S1_s_at | ZDHHC14                       |
| GgaAffx.8725.1.S1_s_at | CNDP2                         |
| GgaAffx.8727.1.S1_at   | C18orf51                      |
| GgaAffx.8733.1.S1_at   | PCNX                          |
| GgaAffx.8736.1.S1_at   | LOC770831                     |
| GgaAffx.8737.1.S1_at   | DLC1                          |
| GgaAffx.8738.1.S1_at   | PRDM2                         |
| GgaAffx.874.1.S1_at    | TRSPAP1                       |
| GgaAffx.8741.1.S1_at   | LONRF1                        |
| GgaAffx.8745.1.S1_at   | CBLN2                         |
| GgaAffx.8755.1.A1_at   | ENPP7                         |
| GgaAffx.8756.1.S1_at   | LOC769836                     |
| GgaAffx.8757.1.S1_at   | CD226                         |
| GgaAffx.876.1.S1_s_at  | SNAP29                        |
| GgaAffx.8761.1.S1_at   | LOC769676                     |
| GgaAffx.8763.1.S1_s_at | DOK6                          |
| GgaAffx.8765.1.S1_at   | GFPT2 /// LOC416372           |
| GgaAffx.8771.1.S1_s_at | GALK2                         |
| GgaAffx.8774.8.S1_x_at | LOC429898                     |
| GgaAffx.8775.1.S1_s_at | HIVEP2                        |
| GgaAffx.8779.1.S1_at   | LOC768893                     |
| GgaAffx.8785.1.S1_at   | IMPA2                         |
| GgaAffx.8788.1.S1_at   | TNPO3                         |
| GgaAffx.879.2.S1_s_at  | PTGS1                         |
| GgaAffx.8810.1.S1_at   | SLC35D3                       |
| GgaAffx.882.2.S1_s_at  | COX10                         |

|                        |                                 |
|------------------------|---------------------------------|
| GgaAffx.8820.1.S1_at   | RNMT                            |
| GgaAffx.8821.1.S1_at   | MC2R                            |
| GgaAffx.8823.2.S1_at   | LOC426295 /// LOC770658         |
| GgaAffx.8828.2.S1_at   | RCJMB04_18g1                    |
| GgaAffx.8837.1.S1_at   | GIMAP1                          |
| GgaAffx.8840.1.S1_at   | LOC421690                       |
| GgaAffx.8842.1.S1_s_at | LOC421049                       |
| GgaAffx.8846.1.S1_at   | LOC421049 /// LOC769555         |
| GgaAffx.8847.1.S1_at   | RCJMB04_5f7                     |
| GgaAffx.8861.1.S1_at   | SCFD2                           |
| GgaAffx.8868.2.S1_s_at | FAM38B                          |
| GgaAffx.8875.1.S1_at   | GNG4                            |
| GgaAffx.8878.1.S1_s_at | QDPR                            |
| GgaAffx.8887.1.S1_s_at | RCJMB04_35g11 /// VNN1          |
| GgaAffx.8889.1.S1_at   | TAAR1                           |
| GgaAffx.889.1.S1_at    | ZBTB44                          |
| GgaAffx.8892.1.S1_at   | LOC426330                       |
| GgaAffx.8892.1.S1_x_at | LOC426330                       |
| GgaAffx.8894.1.S1_at   | EPB41L2                         |
| GgaAffx.8900.1.S1_at   | RCJMB04_14c24                   |
| GgaAffx.8901.1.S1_at   | LRMP                            |
| GgaAffx.8903.1.S1_s_at | ARHGAP18                        |
| GgaAffx.8910.1.S1_at   | RCJMB04_9e6                     |
| GgaAffx.8910.2.S1_s_at | RCJMB04_9e6                     |
| GgaAffx.8913.1.S1_at   | CASC1                           |
| GgaAffx.8921.1.S1_at   | RCJMB04_21o24                   |
| GgaAffx.8928.1.S1_at   | KIAA0802                        |
| GgaAffx.8939.1.S1_s_at | LOC422763                       |
| GgaAffx.8941.1.S1_at   | LOC420252                       |
| GgaAffx.896.1.S1_at    | LOC419599                       |
| GgaAffx.8960.1.S1_at   | TXK                             |
| GgaAffx.8962.4.S1_at   | LOC426333 /// LOC769807         |
| GgaAffx.8962.6.S1_at   | LOC425324 /// LOC426333 /// LOC |
| GgaAffx.8964.1.S1_at   | NPAL1                           |
| GgaAffx.8965.1.S1_at   | LOC769475                       |
| GgaAffx.8969.1.S1_at   | LOC776064                       |
| GgaAffx.8972.1.S1_s_at | RCJMB04_8k11                    |
| GgaAffx.8978.2.S1_s_at | TTLL1                           |
| GgaAffx.8990.1.S1_at   | CAPRIN1                         |
| GgaAffx.9002.1.S1_s_at | ATP10D                          |

|                        |                         |
|------------------------|-------------------------|
| GgaAffx.9002.3.S1_s_at | ATP10D                  |
| GgaAffx.9008.1.S1_at   | PARVG                   |
| GgaAffx.9008.1.S1_s_at | PARVG                   |
| GgaAffx.9013.1.S1_at   | GNPDA2                  |
| GgaAffx.9014.1.S1_at   | EFCAB4B                 |
| GgaAffx.9022.1.S1_at   | RCJMB04_3j12            |
| GgaAffx.9023.1.S1_at   | ATXN10                  |
| GgaAffx.9032.4.S1_s_at | ATP8A1                  |
| GgaAffx.9032.5.S1_s_at | ATP8A1                  |
| GgaAffx.9033.1.S1_s_at | RCJMB04_11o5            |
| GgaAffx.9036.1.S1_at   | CCDC4                   |
| GgaAffx.9045.1.S1_at   | A2M                     |
| GgaAffx.9051.1.S1_s_at | APBB2                   |
| GgaAffx.9058.2.S1_s_at | RBM47                   |
| GgaAffx.9064.1.S1_at   | RHOH                    |
| GgaAffx.907.1.S1_at    | NADK                    |
| GgaAffx.9070.1.S1_s_at | NMRAL1                  |
| GgaAffx.9083.1.S1_at   | UGDH                    |
| GgaAffx.9087.2.S1_s_at | ARL2BP                  |
| GgaAffx.9093.1.S1_at   | ITFG2                   |
| GgaAffx.9094.1.S1_s_at | RELL1                   |
| GgaAffx.9098.1.S1_at   | CENTD1                  |
| GgaAffx.9104.2.S1_at   | LOC426508 /// LOC776720 |
| GgaAffx.9105.1.S1_at   | STIM2                   |
| GgaAffx.9109.1.S1_s_at | R3HDM2                  |
| GgaAffx.911.1.S1_at    | MYBBP1A                 |
| GgaAffx.9117.2.S1_s_at | MAN1A2                  |
| GgaAffx.9117.5.S1_s_at | MAN1A2                  |
| GgaAffx.9120.1.S1_at   | CCKAR                   |
| GgaAffx.9120.2.S1_s_at | CCKAR                   |
| GgaAffx.9121.1.S1_at   | APOA5                   |
| GgaAffx.9126.1.S1_at   | LGALS8                  |
| GgaAffx.9126.5.S1_s_at | LGALS8                  |
| GgaAffx.9126.6.S1_at   | LGALS8                  |
| GgaAffx.9126.6.S1_x_at | LGALS8                  |
| GgaAffx.9134.1.S1_at   | SEPSECS                 |
| GgaAffx.9142.1.S1_at   | PPARGC1A                |
| GgaAffx.9143.2.S1_at   | LOC430964               |
| GgaAffx.9152.2.S1_s_at | CASR                    |
| GgaAffx.916.1.S1_at    | HS3ST3A1 /// LOC769421  |

|                        |                     |       |
|------------------------|---------------------|-------|
| GgaAffx.9160.1.S1_at   | NCAPG               |       |
| GgaAffx.9166.2.S1_at   | DHX32               |       |
| GgaAffx.9173.1.A1_at   | FAM46C              |       |
| GgaAffx.9174.2.S1_at   | CHD4 /// LOC426176  |       |
| GgaAffx.9174.2.S1_s_at | CHD4 /// LOC426176  |       |
| GgaAffx.9175.1.A1_at   | GPR92               |       |
| GgaAffx.9175.1.S1_at   | GPR92               |       |
| GgaAffx.9185.1.A1_at   | C12orf53            |       |
| GgaAffx.9194.1.S1_at   | LAG3                |       |
| GgaAffx.9196.1.S1_s_at | LOC429336           |       |
| GgaAffx.9197.1.S1_at   | RCJMB04_7120        |       |
| GgaAffx.9212.1.S1_s_at | PROM1               |       |
| GgaAffx.9231.1.S1_at   | CSPP1               |       |
| GgaAffx.9231.2.S1_s_at | CSPP1               |       |
| GgaAffx.9238.1.S1_at   | LOC426620           |       |
| GgaAffx.9241.3.S1_s_at | SH3TC2              |       |
| GgaAffx.9243.1.S1_s_at | CNOT6 /// LOC772253 |       |
| GgaAffx.9243.3.S1_s_at | CNOT6               |       |
| GgaAffx.9256.1.S1_s_at | C1S                 |       |
| GgaAffx.9257.1.S1_at   | AGBL2               |       |
| GgaAffx.9262.1.S1_at   | MT3                 |       |
| GgaAffx.9263.1.S1_s_at | SUPT5H              |       |
| GgaAffx.9268.1.S1_at   | LASS3               |       |
| GgaAffx.9268.2.S1_s_at | LASS3               |       |
| GgaAffx.927.3.S1_s_at  | SPNS2               |       |
| GgaAffx.9275.1.S1_at   | CHD1                |       |
| GgaAffx.9281.1.S1_at   | LOC427110           |       |
| GgaAffx.9283.1.S1_at   | LOC427110           |       |
| GgaAffx.9284.1.S1_at   | MCTP1               |       |
| GgaAffx.9290.2.S1_s_at | CLSTN3              |       |
| GgaAffx.9296.3.S1_s_at | ELL2                |       |
| GgaAffx.9299.2.S1_at   | LOC769230 /// PC1   |       |
| GgaAffx.9300.1.S1_at   | CAST                |       |
| GgaAffx.9312.1.S1_at   |                     | 40971 |
| GgaAffx.9324.5.S1_s_at | MEGF10              |       |
| GgaAffx.9336.1.S1_at   | IL31RA              |       |
| GgaAffx.9342.1.S1_at   | LOC769174           |       |
| GgaAffx.9345.1.S1_at   | LOC770348           |       |
| GgaAffx.9346.1.S1_s_at | DEPDC1B             |       |
| GgaAffx.9347.1.S1_at   | ELOVL7              |       |

|                        |           |
|------------------------|-----------|
| GgaAffx.9350.2.S1_s_at | LOC770670 |
| GgaAffx.9351.1.S1_at   | LOC425720 |
| GgaAffx.9361.2.S1_s_at | RNF180    |
| GgaAffx.9364.1.S1_at   | SFRS12IP1 |
| GgaAffx.9368.2.S1_at   | ADAMTS6   |
| GgaAffx.9368.2.S1_s_at | ADAMTS6   |
| GgaAffx.9392.1.S1_at   | LOC427170 |
| GgaAffx.9401.1.S1_at   | LOC770116 |
| GgaAffx.9404.1.S1_at   | KIAA2018  |
| GgaAffx.9411.1.S1_at   | HOMER1    |
| GgaAffx.9412.1.S1_at   | LOC427182 |
| GgaAffx.9414.2.S1_s_at | EMILIN2   |
| GgaAffx.9415.1.S1_at   | PTPRK     |
| GgaAffx.9416.1.S1_at   | TRIM45    |
| GgaAffx.9419.1.S1_at   | C6orf190  |
| GgaAffx.9422.1.S1_at   | PTGER4    |
| GgaAffx.9422.2.S1_s_at | PTGER4    |
| GgaAffx.9423.1.S1_at   | C6orf174  |
| GgaAffx.9426.1.S1_at   | PRKAA1    |
| GgaAffx.9429.4.S1_at   | LPIN2     |
| GgaAffx.9435.1.S1_at   | FBXO4     |
| GgaAffx.9441.2.S1_s_at | LOC776223 |
| GgaAffx.945.1.S1_at    | AIRE      |
| GgaAffx.9464.1.S1_at   | DCBLD1    |
| GgaAffx.9472.1.S1_at   | LOC427201 |
| GgaAffx.9473.1.S1_s_at | POLQ      |
| GgaAffx.9478.1.S1_s_at | LOC427201 |
| GgaAffx.9484.1.S1_at   | KPNA5     |
| GgaAffx.9484.1.S1_s_at | KPNA5     |
| GgaAffx.9493.1.S1_s_at | STXBP5L   |
| GgaAffx.9494.1.S1_at   | LOC431595 |
| GgaAffx.9499.1.S1_at   | GTF2E1    |
| GgaAffx.9504.1.S1_at   | C5orf37   |
| GgaAffx.9506.1.S1_at   | SV2C      |
| GgaAffx.9512.2.S1_at   | MIB1      |
| GgaAffx.9512.2.S1_s_at | MIB1      |
| GgaAffx.9515.1.S1_at   | F2R       |
| GgaAffx.9520.1.S1_at   | TMEM128   |
| GgaAffx.9520.1.S1_s_at | TMEM128   |
| GgaAffx.9525.1.S1_at   | LYAR      |

|                        |                           |
|------------------------|---------------------------|
| GgaAffx.9530.1.S1_at   | SLC22A15                  |
| GgaAffx.9542.1.S1_at   | EVC                       |
| GgaAffx.9549.1.S1_at   | CDC2L6                    |
| GgaAffx.9557.1.S1_s_at | LAMA3                     |
| GgaAffx.9565.2.S1_s_at | PTPRD                     |
| GgaAffx.9568.1.S1_s_at | CDC40                     |
| GgaAffx.9578.1.S1_s_at | LOC418344                 |
| GgaAffx.9580.1.S1_at   | MLLT3                     |
| GgaAffx.9580.2.S1_s_at | MLLT3                     |
| GgaAffx.9581.1.S1_at   | ASAH3L                    |
| GgaAffx.9582.1.S1_s_at | DENND4C                   |
| GgaAffx.9583.1.S1_at   | OSBPL1A                   |
| GgaAffx.9585.1.S1_s_at | LOC427239 /// RCJMB04_9g9 |
| GgaAffx.9593.1.S1_at   | C9orf39                   |
| GgaAffx.9597.1.S1_at   | LOC431604                 |
| GgaAffx.9599.1.S1_at   | LOC421081                 |
| GgaAffx.9602.1.S1_at   | APBA1                     |
| GgaAffx.9611.1.S1_at   | TAF4B                     |
| GgaAffx.9611.2.S1_s_at | TAF4B                     |
| GgaAffx.9617.1.A1_at   | GPR15                     |
| GgaAffx.9617.1.S1_at   | GPR15                     |
| GgaAffx.9622.1.S1_s_at | ILDR1                     |
| GgaAffx.9623.1.S1_at   | WDR52                     |
| GgaAffx.9628.1.S1_at   | GDA                       |
| GgaAffx.9629.1.S1_at   | DSG2                      |
| GgaAffx.9633.1.S1_s_at | B4GALT6                   |
| GgaAffx.9635.2.S1_s_at | LOC421093                 |
| GgaAffx.9649.1.S1_at   | LOC431610                 |
| GgaAffx.9650.1.S1_at   | LOC431610                 |
| GgaAffx.9660.1.S1_at   | GNA14                     |
| GgaAffx.9661.1.S1_at   | RCJMB04_23b22             |
| GgaAffx.9662.1.S1_at   | RCJMB04_23b22             |
| GgaAffx.9678.2.S1_at   | DTNA                      |
| GgaAffx.968.3.S1_s_at  | ZAP70                     |
| GgaAffx.9694.1.S1_at   | LOC421107                 |
| GgaAffx.9704.1.S1_at   | TMEM157                   |
| GgaAffx.9710.2.S1_s_at | LOC769132                 |
| GgaAffx.9719.1.S1_at   | GIN1                      |
| GgaAffx.972.2.S1_s_at  | NCAPD3                    |
| GgaAffx.9720.1.A1_at   | RB1CC1                    |

|                        |                         |
|------------------------|-------------------------|
| GgaAffx.973.1.S1_at    | PPM1F                   |
| GgaAffx.9731.1.S1_s_at | TBC1D23                 |
| GgaAffx.9731.3.S1_s_at | TBC1D23                 |
| GgaAffx.9740.1.S1_at   | ARMC2                   |
| GgaAffx.9743.1.S1_s_at | GPR128                  |
| GgaAffx.9750.2.S1_s_at | LNPEP                   |
| GgaAffx.9753.1.S1_at   | LACE1                   |
| GgaAffx.9753.2.S1_at   | LACE1                   |
| GgaAffx.9757.3.S1_s_at | ABI3BP                  |
| GgaAffx.9758.1.S1_at   | SCML4                   |
| GgaAffx.9763.1.S1_s_at | RCJMB04_24g5            |
| GgaAffx.9763.2.S1_s_at | RCJMB04_24g5            |
| GgaAffx.9767.1.S1_at   | LOC776393               |
| GgaAffx.9770.3.S1_s_at | IMPG2                   |
| GgaAffx.9771.1.S1_at   | SENP7                   |
| GgaAffx.9774.1.S1_at   | LOC421125               |
| GgaAffx.9782.1.S1_at   | AIM1                    |
| GgaAffx.9785.3.S1_s_at | CBLB                    |
| GgaAffx.9788.1.S1_at   | SH2D1B                  |
| GgaAffx.9789.1.S1_at   | TRAT1                   |
| GgaAffx.9801.1.S1_at   | THAP1                   |
| GgaAffx.9802.1.S1_at   | PRDM1                   |
| GgaAffx.9805.1.S1_s_at | TMPRSS7                 |
| GgaAffx.9807.1.S1_at   | HOOK3                   |
| GgaAffx.9812.1.A1_at   | CGGBP1                  |
| GgaAffx.9813.1.S1_at   | LOC430761 /// LOC776461 |
| GgaAffx.9818.5.S1_s_at | PREP                    |
| GgaAffx.9822.1.S1_at   | HACE1                   |
| GgaAffx.9822.2.S1_at   | HACE1                   |
| GgaAffx.9824.3.S1_s_at | MINA /// RCJMB04_19e21  |
| GgaAffx.9826.1.S1_at   | PSD3                    |
| GgaAffx.983.1.S1_at    | SLC12A1                 |
| GgaAffx.9831.1.S1_at   | FSD1L                   |
| GgaAffx.9837.1.S1_at   | CD2                     |
| GgaAffx.9848.1.S1_s_at | IGSF3                   |
| GgaAffx.9854.2.S1_s_at | CHD7                    |
| GgaAffx.9859.1.S1_at   | KTELC1                  |
| GgaAffx.9870.1.S1_at   | GGH                     |
| GgaAffx.9875.1.S1_s_at | ARMC1                   |
| GgaAffx.9878.1.S1_at   | KLHL32                  |



|                        |           |
|------------------------|-----------|
| GgaAffx.9878.2.S1_s_at | KLHL32    |
| GgaAffx.988.3.S1_s_at  | CEP110    |
| GgaAffx.9882.3.S1_at   | ROBO2     |
| GgaAffx.9887.1.S1_s_at | SGK3      |
| GgaAffx.9910.1.S1_s_at | GRIN3A    |
| GgaAffx.9911.1.S1_at   | GRIN3A    |
| GgaAffx.9927.1.S1_at   | LOC427316 |
| GgaAffx.9928.1.A1_at   | ANKRD34B  |
| GgaAffx.9931.3.S1_s_at | KIAA0776  |
| GgaAffx.9935.1.S1_at   | SLCO5A1   |
| GgaAffx.9938.1.S1_at   | LOC427318 |
| GgaAffx.9956.3.S1_s_at | HGFAC     |
| GgaAffx.9957.1.S1_at   | LACTB2    |
| GgaAffx.9957.1.S1_s_at | LACTB2    |
| GgaAffx.9960.1.S1_at   | HTT       |
| GgaAffx.998.1.S1_at    | VWA1      |
| GgaAffx.9985.1.S1_s_at | ROD1      |
| GgaAffx.9996.1.S1_s_at | SUSD1     |

The different number of asterisks (\*) indicates statistically significant d

**nfected and RB1B infected chicken thymus tissues at 7, 14 21 and 28 dpi**

| Gene_Title                                                  | Fold Change (Mean) |          |          |
|-------------------------------------------------------------|--------------------|----------|----------|
|                                                             | 7dpi               | 14dpi    | 21dpi    |
| breast cancer 2, early onset                                | 1.015492           | 1.002534 | 0.968901 |
| orthodenticle homeobox 2                                    |                    |          | 2.372843 |
| Fas (TNF receptor superfamily, member 6)                    | 2.093793           | 2.20886  | 2.301005 |
| MKL/myocardin-like 2                                        | 2.49162            | 0.890158 | 1.224265 |
| hypothetical LOC416212                                      | 0.854166           | 2.28451  |          |
| zinc finger protein 512B                                    | 1.18886            | 0.730429 | 1.923972 |
| Solute carrier family 30 (zinc transporter), member 1       | 1.052566           | 1.235698 | 1.530342 |
| hypothetical protein LOC777533                              | 0.829933           | 0.909606 | 1.142019 |
| amylo-1, 6-glucosidase, 4-alpha-glucanotransferase (glycoge | 0.643951           | 1.101461 | 0.439414 |
| phosphatidylcholine transfer protein                        | 0.851164           | 1.224057 | 2.356533 |
| chromogranin B (secretogranin 1)                            | 1.301589           |          |          |
| vacuolar protein sorting 37 homolog B (S. cerevisiae)       |                    |          |          |
| cleavage and polyadenylation specific factor 3, 73kDa       |                    | 3.888355 |          |
| secernin 3                                                  | 1.716606           | 1.056959 | 0.338347 |
| Polymerase (RNA) I polypeptide B, 128kDa                    | 0.954794           | 0.874226 | 0.158632 |
| chromosome 20 open reading frame 58                         | 3.648778           | 1.426398 | 4.267167 |
| serpin peptidase inhibitor, clade B (ovalbumin), member 2   | 1.743185           | 3.425903 | 0.754401 |
| Serpin peptidase inhibitor, clade B (ovalbumin), member 2   | 3.926374           | 8.799125 | 0.969519 |
| serpin peptidase inhibitor, clade B (ovalbumin), member 2   | 1.883896           | 2.08595  | 1.025533 |
| Down syndrome critical region gene 2                        | 0.69904            | 1.154573 | 0.376312 |
| NADPH oxidase organizer 1                                   |                    |          | 0.04199  |
| CD200 receptor 1                                            | 2.218277           | 1.60943  | 5.400762 |
| Valosin-containing protein                                  | 2.26975            |          | 0.33704  |
| regulator of chromosome condensation (RCC1) and BTB (P      | 0.401577           | 1.654566 | 0.664966 |
| PHD finger protein 20-like 1                                | 1.154789           | 1.216548 | 1.102787 |
| t-complex 11 (mouse)-like 1                                 |                    |          |          |
| TATA box binding protein                                    | 1.10323            | 1.066117 | 0.878966 |
| TATA box binding protein                                    | 1.086252           | 0.989085 | 0.42972  |
| ubiquitin-activating enzyme E1-like 2                       | 0.530471           | 0.498726 |          |
| solute carrier family 16, member 6 (monocarboxylic acid tra | 0.858615           | 1.32397  | 0.193521 |
| transcription termination factor, RNA polymerase II         |                    |          | 0.182243 |
| ubiquitin specific peptidase 54                             |                    |          |          |
| Myotubularin related protein 7                              | 1.407102           | 0.668203 | 2.812147 |
| KN motif and ankyrin repeat domains 4                       | 1.76584            | 1.597441 | 2.941288 |

|                                                                       |          |          |          |
|-----------------------------------------------------------------------|----------|----------|----------|
| kelch domain containing 10                                            | 0.401871 | 0.844281 | 0.539734 |
| Core-binding factor, runt domain, alpha subunit 2; translocated to, 3 |          |          | 0.457757 |
| WD repeat domain 35                                                   | 0.314886 | 2.886201 | 2.433113 |
| WD repeat domain 35                                                   |          | 3.988382 |          |
| Similar to KIAA0712 protein                                           | 0.684272 | 0.304815 | 0.714333 |
| fibulin 5                                                             | 1.659269 | 1.751496 | 3.267515 |
| fibroblast activation protein, alpha                                  |          |          | 0.794608 |
| intraflagellar transport 80 homolog (Chlamydomonas)                   | 0.948325 | 0.844586 | 0.405309 |
| cordon-bleu homolog (mouse)                                           | 0.902538 | 0.856739 | 0.441963 |
| NLR family, CARD domain containing 5                                  | 0.637405 | 2.100674 | 0.602615 |
| annexin A8                                                            | 0.418762 | 1.133532 | 0.151639 |
| arginyl aminopeptidase (aminopeptidase B)-like 1                      | 1.10867  | 0.283937 | 0.991528 |
| arginyl aminopeptidase (aminopeptidase B)-like 1                      | 0.606356 | 1.271502 | 2.023698 |
| SET binding protein 1                                                 |          |          | 40.17753 |
| SET binding protein 1                                                 |          | 0.673571 |          |
| Fas apoptotic inhibitory molecule                                     | 1.096464 | 0.898013 | 0.320386 |
| enoyl Coenzyme A hydratase domain containing 1                        |          |          |          |
| transmembrane 4 L six family member 4                                 |          |          | 0.135321 |
| TBC1 domain family, member 8B (with GRAM domain)                      | 1.560444 | 1.522277 | 0.732416 |
| Similar to AHI1 protein                                               | 0.433109 | 1.046426 | 0.575256 |
| Similar to AHI1 protein                                               | 0.560592 | 1.058862 | 1.818079 |
| DnaJ (Hsp40) homolog, subfamily C, member 28                          | 0.991982 | 1.008099 | 1.619541 |
| chromosome 3 open reading frame 26                                    | 1.972657 | 2.746603 | 0.331597 |
| UDP-N-acetyl-alpha-D-galactosamine:polypeptide N-acetylglactosami     |          | 1.350184 | 0.051293 |
| epiregulin                                                            | 2.598501 | 0.598287 |          |
| endoplasmic reticulum protein 27 kDa                                  |          | 4.965324 |          |
| flotillin 2                                                           | 0.719506 | 1.110647 | 2.731668 |
| neurotensin                                                           | 6.367449 | 6.33206  | 2.836062 |
| RERG/RAS-like                                                         | 6.405937 |          |          |
| RERG/RAS-like                                                         |          |          | 5.078518 |
| recombination signal binding protein for immunoglobulin ka            | 1.370788 | 1.531251 | 0.374079 |
| recombination signal binding protein for immunoglobulin ka            | 1.473147 | 1.09733  | 0.390764 |
| serine/threonine/tyrosine interacting-like 1                          | 0.510732 | 1.212054 | 0.279896 |
| Cytidine deaminase                                                    |          | 0.331433 |          |
| Splicing factor 3b, subunit 1, 155kDa                                 |          | 4.39717  | 0.055953 |
| cell adhesion molecule 2                                              | 1.860217 |          | 0.400049 |
| similar to FLJ12476 protein                                           | 0.44564  |          |          |
| Solute carrier family 18 (vesicular monoamine), member 1              | 1.007566 | 0.774004 | 1.758814 |
| additional sex combs like 3 (Drosophila)                              | 0.661744 | 0.671096 | 0.23132  |
| TOX high mobility group box family member 3                           |          |          |          |

|                                                           |          |          |          |
|-----------------------------------------------------------|----------|----------|----------|
| chemokine (C-C motif) ligand 17                           | 0.54175  | 1.464508 | 6.736172 |
| mannan-binding lectin serine peptidase 2                  |          | 11.52892 |          |
| intestinal zipper protein /// similar to zipper protein   | 10.4874  | 1.024669 | 0.369629 |
| mitogen-activated protein kinase 12                       | 3.086698 | 1.632821 | 1.010218 |
| enhancer of zeste homolog 1 (Drosophila)                  | 0.694745 |          | 4.534922 |
| alkB, alkylation repair homolog 4 (E. coli)               | 0.851821 | 1.117418 | 1.852513 |
| ATP-binding cassette, sub-family A (ABC1), member 5       |          | 1.01345  | 0.013773 |
| tripartite motif-containing 65                            | 0.698022 | 0.849294 | 1.562876 |
| hypothetical LOC418990                                    | 0.692607 |          | 2.298861 |
| hypothetical LOC418990                                    |          | 0.881968 | 0.942141 |
| similar to similar to RIKEN cDNA 4933405A16 /// sphingor  | 2.428624 | 0.822279 | 2.105324 |
| fibrinogen alpha chain                                    |          |          |          |
| cytochrome P450, family 8, subfamily B                    | 0.855562 | 1.004852 | 4.755777 |
| chromodomain protein, Y-like 2                            |          | 2.444428 |          |
| chromosome 2 open reading frame 18                        | 0.7493   | 1.059132 | 1.958422 |
| oncostatin M receptor                                     | 1.275975 |          | 3.309956 |
| JMJD7-PLA2G4B readthrough transcript                      | 6.425811 | 0.61179  | 0.156465 |
| N-sulfoglucosamine sulfohydrolase (sulfamidase)           | 1.107683 | 1.364547 | 4.03433  |
| similar to Rps15a protein                                 | 1.976773 | 0.975907 | 0.38719  |
| GNAS complex locus                                        | 0.373411 | 0.927106 |          |
| Dual specificity phosphatase 13                           |          |          | 11.50077 |
| syntaxin binding protein 4                                | 2.046823 | 1.166284 | 2.144421 |
| Similar to RAB15                                          | 2.121759 |          |          |
| similar to Rho-GTPase-activating protein 6 (Rho-type GTPa | 1.262441 | 1.269799 | 2.04411  |
| developmentally regulated GTP binding protein 1           | 1.520143 | 0.820788 | 1.050772 |
| oleoyl-ACP hydrolase                                      | 1.95355  | 1.261712 | 0.2474   |
| phenazine biosynthesis-like protein domain containing     | 0.344112 | 0.713261 | 0.90173  |
| retinoblastoma binding protein 4                          | 1.001543 | 0.988707 | 0.616194 |
| retinoblastoma binding protein 4                          | 0.642103 | 1.093504 | 0.362978 |
| similar to RIKEN cDNA 3110009E18                          | 1.075559 | 1.809511 | 0.950064 |
| similar to hypothetical protein MGC17337                  | 0.701679 | 0.877999 | 0.627137 |
| carnitine palmitoyltransferase 1A (liver)                 | 0.792444 | 0.977201 | 4.520892 |
| ER degradation enhancer, mannosidase alpha-like 3         |          | 0.144472 |          |
| myosin, heavy chain 7B, cardiac muscle, beta              | 0.71758  | 0.40588  | 2.972533 |
| caveolin 2                                                | 2.034206 | 0.819936 | 1.93165  |
| GTPase activating protein and VPS9 domains 1              | 1.252363 | 0.732274 | 0.807187 |
| HCLS1 binding protein 3                                   | 0.932011 | 1.286462 | 5.019706 |
| exportin 5                                                | 28.06266 | 1.271888 | 1.56787  |
| RNA binding motif protein 14                              | 1.417484 | 1.220524 | 1.059801 |
| RNA binding motif protein 14                              |          | 0.292185 |          |

|                                                                    |          |          |          |
|--------------------------------------------------------------------|----------|----------|----------|
| similar to ENSANGP00000018456                                      | 0.4421   | 1.761196 |          |
| Hypothetical LOC422765                                             |          | 0.955666 |          |
| abhydrolase domain containing 11                                   |          |          | 2.808249 |
| RNA binding motif protein 26                                       | 0.685877 | 1.561155 | 0.380003 |
| similar to lysophospholipase I                                     | 0.345993 | 0.682905 | 0.060888 |
| transglutaminase 2 (C polypeptide, protein-glutamine-gamm          | 3.30078  | 2.031522 | 9.471435 |
| chromosome 19 open reading frame 12 /// similar to RIKEN           | 3.488899 | 1.900745 | 4.414374 |
| similar to RIKEN cDNA 1600014C10                                   | 6.144438 | 2.694762 | 4.363682 |
| Katanin p60 (ATPase-containing) subunit A 1                        | 0.517155 | 1.00116  | 0.355274 |
| ADP-ribosylation factor-like 11                                    |          | 0.559978 | 2.024722 |
| CDC14 cell division cycle 14 homolog C (S. cerevisiae)             | 0.603811 | 1.449701 | 0.492357 |
| Small nuclear ribonucleoprotein polypeptide A'                     | 1.012663 | 1.077094 | 0.758589 |
| adenomatous polyposis coli                                         | 0.382682 | 0.768748 | 1.031083 |
| integrin, beta 3 (platelet glycoprotein IIIa, antigen CD61)        | 1.240236 | 0.881992 | 2.217709 |
| G protein-coupled receptor 123                                     |          |          | 0.058537 |
| Translocase of inner mitochondrial membrane 10 homolog (c          | 0.800935 | 3.595135 | 1.843172 |
| solute carrier family 30 (zinc transporter), member 9              | 0.627067 | 1.102155 | 0.484735 |
| UDP-Gal:betaGlcNAc beta 1,3-galactosyltransferase, polype          | 0.480795 | 1.268549 |          |
| sorting nexin 16                                                   | 0.445954 | 0.74961  | 1.424609 |
| cylindromatosis (turban tumor syndrome)                            | 1.082668 |          |          |
| MAM domain containing glycosylphosphatidylinositol anchor 1        |          | 3.027958 |          |
| nucleolar protein 10                                               | 1.399362 | 0.983086 | 0.389327 |
| Similar to Myelin protein zero-like 1                              | 0.718896 | 1.115231 | 3.345933 |
| growth hormone inducible transmembrane protein                     |          | 0.161858 |          |
| CSRP2 binding protein                                              | 0.791153 | 1.133555 | 0.591028 |
| Similar to golgi-associated microtubule-binding protein HOC        | 0.772811 | 1.056399 | 2.76269  |
| visinin-like 1                                                     | 0.173887 |          |          |
| nudix (nucleoside diphosphate linked moiety X)-type motif 1        | 0.871566 | 1.124498 | 0.685061 |
| Wolf-Hirschhorn syndrome candidate 1                               | 0.96797  | 1.715829 | 0.481998 |
| fibronectin 1                                                      |          |          | 2.00342  |
| atrophin 1                                                         |          | 4.48422  |          |
| ATPase, H <sup>+</sup> transporting, lysosomal 34kDa, V1 subunit D |          |          | 0.06829  |
| ring finger protein 151                                            | 0.455594 | 2.428633 |          |
| peroxisome biogenesis factor 10                                    | 0.183242 | 1.102833 |          |
| similar to dedicator of cytokinesis 11                             | 0.930751 | 0.800349 | 0.276784 |
| sel-1 suppressor of lin-12-like (C. elegans)                       | 1.541269 | 1.169201 | 0.457928 |
| similar to Family with sequence similarity 35, member A            | 2.889126 | 0.623095 | 0.459683 |
| ankyrin repeat and FYVE domain containing 1                        |          |          |          |
| 3-hydroxymethyl-3-methylglutaryl-Coenzyme A lyase-like 1           |          |          |          |
| solute carrier family 36 (proton/amino acid symporter), mem        | 0.92439  | 1.427773 | 2.762508 |

|                                                                        |          |          |          |
|------------------------------------------------------------------------|----------|----------|----------|
| teashirt family zinc finger 1                                          |          |          | 0.050757 |
| teashirt family zinc finger 1                                          | 0.624904 | 0.488342 | 0.555524 |
| cadherin 17, LI cadherin (liver-intestine)                             | 0.126613 |          |          |
| Hypothetical LOC419647                                                 | 0.059198 |          |          |
| polymerase (RNA) I polypeptide A, 194kDa                               | 0.399149 | 1.07155  | 1.259378 |
| Ellis van Creveld syndrome                                             | 0.242806 |          |          |
| engulfment and cell motility 2                                         | 0.806867 | 0.551121 | 0.496274 |
| family with sequence similarity 102, member A                          | 1.100262 |          | 1.074438 |
| family with sequence similarity 102, member A                          | 0.592642 |          | 3.609779 |
| choline dehydrogenase                                                  |          |          |          |
| bone morphogenetic protein receptor, type II (serine/threonine kinase) |          | 1.027208 | 0.135073 |
| potassium channel tetramerisation domain containing 15                 | 0.788166 |          | 2.31049  |
| distal-less homeobox 1                                                 |          |          | 0.126261 |
| cAMP responsive element binding protein-like 2                         | 0.524459 | 0.801134 | 0.420241 |
| leucine rich repeat containing 41                                      | 0.062636 |          |          |
| Glycoprotein, synaptic 2                                               |          |          |          |
| GTPase activating Rap/RanGAP domain-like 1                             | 0.684096 | 0.9054   | 0.400315 |
| DAZ associated protein 1 /// interferon regulatory factor 4            | 1.600714 | 0.51735  | 1.942455 |
| Prokineticin 2                                                         |          |          |          |
| Similar to RNase H, putative                                           | 2.283373 | 0.476826 | 1.002583 |
| poly(A) binding protein, cytoplasmic 4 (inducible form)                | 1.551575 | 0.778246 | 2.724811 |
| CCR4-NOT transcription complex, subunit 1                              | 0.427564 | 0.501091 | 1.239287 |
| CCR4-NOT transcription complex, subunit 1                              | 0.369381 | 1.5472   | 0.479893 |
| family with sequence similarity 38, member B                           |          |          |          |
| serum response factor binding protein 1                                | 0.695573 | 1.188572 | 1.702659 |
| similar to MGC82198 protein                                            |          |          | 0.297468 |
| peroxisomal biogenesis factor 7                                        | 0.542503 | 2.018378 | 1.005069 |
| similar to EM4b                                                        |          |          | 0.057891 |
| hexokinase 2                                                           | 2.421134 | 0.954237 | 1.68021  |
| DEAH (Asp-Glu-Ala-His) box polypeptide 36                              | 1.455708 | 0.450966 | 1.955799 |
| calmodulin regulated spectrin-associated protein 1-like 1              |          |          | 0.036719 |
| Obg-like ATPase 1                                                      | 0.881327 | 1.05332  | 0.428972 |
| oxysterol binding protein-like 5                                       | 5.765184 |          |          |
| nuclear factor of kappa light polypeptide gene enhancer in B           | 2.910817 | 1.184179 | 1.815423 |
| similar to RIKEN cDNA 2600010E01                                       | 0.573095 | 0.720583 | 0.324324 |
| BCL2/adenovirus E1B 19kDa interacting protein 2                        |          | 0.193677 |          |
| BCL2/adenovirus E1B 19kDa interacting protein 2                        | 1.295433 | 1.526752 | 0.139742 |
| neutral sphingomyelinase (N-SMase) activation associated f             | 0.81729  | 1.95716  | 0.525286 |
| interleukin 17 receptor A                                              |          |          | 0.239262 |
| MAX gene associated                                                    | 0.212976 |          |          |

|                                                               |          |          |          |
|---------------------------------------------------------------|----------|----------|----------|
| even-skipped homeobox 2                                       | 4.226799 | 9.368829 | 1.271715 |
| adenosine monophosphate deaminase (isoform E)                 | 0.155066 | 1.001183 | 0.612891 |
| ubiquitin specific peptidase 24                               | 1.278773 | 0.726068 | 0.987591 |
| LYR motif containing 1                                        | 2.829001 | 0.781727 |          |
| suppressor of cytokine signaling 1                            | 4.417478 | 1.876167 | 3.83691  |
| p53 and DNA damage regulated 1                                | 0.784208 | 1.209775 | 2.474109 |
| chromosome 7 open reading frame 25                            | 1.887418 | 0.745609 | 0.572852 |
| popeye domain containing 2                                    | 0.698677 | 1.128084 | 1.459254 |
| myotubularin related protein 3                                |          |          | 0.499892 |
| Similar to amino acid feature: cytoplasmic domain, aa 1 .. 91 | 2.171558 | 0.492982 | 0.449592 |
| cytidine and dCMP deaminase domain containing 1               | 0.74732  | 1.017219 | 0.392059 |
| kinesin family member 15                                      |          | 2.172108 |          |
| signal transducing adaptor molecule (SH3 domain and ITAM      | 0.82995  | 1.421652 | 0.436242 |
| Chromosome 21 open reading frame 7                            | 0.831059 | 1.119911 | 1.848359 |
| pygopus homolog 1 (Drosophila)                                | 1.657131 | 1.91058  | 0.306523 |
| hect domain and RLD 3                                         | 1.262101 | 0.26371  |          |
| cytoplasmic linker associated protein 2                       | 0.940286 | 0.422369 | 0.902727 |
| Notch homolog 2 (Drosophila)                                  | 0.435593 | 1.052914 | 1.301066 |
| DEP domain containing 5                                       | 1.054501 | 1.036062 | 2.131107 |
| tRNA splicing endonuclease 54 homolog (S. cerevisiae)         | 0.88361  | 0.903586 | 0.400234 |
| leucine rich repeat containing 20                             | 1.116712 | 2.214728 | 4.435243 |
| pentatricopeptide repeat domain 2                             | 0.427955 | 1.046528 | 1.732949 |
| tumor protein p53 inducible protein 11                        | 0.143405 | 1.257524 | 1.689193 |
| Ribosomal protein L23                                         | 0.945513 | 0.765827 | 0.451326 |
| Similar to OTTHUMP00000065631                                 |          | 7.110085 |          |
| Fas (TNF receptor superfamily, member 6)                      | 1.299807 | 1.937592 | 3.942662 |
| vacuolar protein sorting 13 homolog B (yeast)                 | 1.213929 | 0.714361 | 1.239039 |
| DnaJ (Hsp40) homolog, subfamily A, member 4                   | 0.201379 | 0.040252 | 0.557546 |
| similar to hypothetical protein FLJ40773                      | 2.724932 | 1.909738 |          |
| chitinase domain containing 1                                 | 0.962475 | 1.51001  | 2.288303 |
| similar to aldo-keto reductase                                | 3.380276 | 1.777032 | 2.138914 |
| 3'-phosphoadenosine 5'-phosphosulfate synthase 1              | 0.526286 | 2.002173 | 0.470421 |
| angiogenic factor with G patch and FHA domains 1              | 0.629671 | 0.847576 | 0.835706 |
| Similar to synaptojanin 2                                     | 1.028769 |          | 0.088601 |
| GINS complex subunit 1 (Psf1 homolog)                         |          |          |          |
| dedicator of cytokinesis 7                                    |          | 0.045754 |          |
| myotubularin related protein 15                               |          | 0.619172 |          |
| galactose mutarotase (aldose 1-epimerase)                     | 0.755256 | 2.194187 | 0.930469 |
| cytochrome P450, family 4, subfamily V, polypeptide 2         | 5.992682 | 2.617084 | 2.134352 |
| cytochrome P450, family 4, subfamily V, polypeptide 2         | 5.37551  |          |          |

|                                                                 |          |          |          |
|-----------------------------------------------------------------|----------|----------|----------|
| Hypothetical protein LOC769486                                  | 0.793975 | 0.185961 |          |
| Hypothetical protein LOC769486                                  |          |          |          |
| GTP-ase like                                                    | 0.951738 | 0.836849 | 2.200885 |
| Similar to Ints3 protein                                        |          |          | 0.223066 |
| receptor accessory protein 3                                    | 0.606531 | 1.891127 | 5.065551 |
| PPPDE peptidase domain containing 2                             | 0.637869 | 1.155179 | 0.250735 |
| RAD52 motif 1                                                   | 0.651083 | 0.326328 | 1.282742 |
| nucleolar protein 8                                             | 0.862053 | 0.18642  | 0.302484 |
| FAT tumor suppressor homolog 2 (Drosophila)                     |          | 1.360512 |          |
| similar to Ran-binding protein 2 /// similar to RanBP2 (Ran-l   | 0.23491  | 1.698091 | 1.64367  |
| similar to Ran-binding protein 2                                | 0.234588 | 1.736717 | 1.393341 |
| Similar to Ran-binding protein 2                                | 0.231373 | 1.53217  | 1.4762   |
| NMDA receptor regulated 1-like                                  | 0.45596  | 1.108178 |          |
| piggyBac transposable element derived 3                         | 1.373309 | 1.102498 | 0.574068 |
| Similar to KIAA1617 protein                                     | 1.351559 | 1.194585 | 2.038439 |
| basic leucine zipper transcription factor, ATF-like 3           | 0.940202 | 1.106509 | 1.53502  |
| glucosidase, alpha; acid (Pompe disease, glycogen storage di    | 0.600175 | 0.237706 | 1.196836 |
| collagen, type IV, alpha 3 (Goodpasture antigen) binding prc    | 0.661079 | 1.728501 | 2.025911 |
| P450 (cytochrome) oxidoreductase                                |          | 1.332964 | 0.415816 |
| methylenetetrahydrofolate dehydrogenase (NADP+ depende          | 2.132916 | 0.655057 | 1.060168 |
| TBC1 domain family, member 24                                   | 0.385659 |          |          |
| leucine rich repeat containing 6                                |          | 2.037552 |          |
| ATPase family, AAA domain containing 1                          | 1.368506 | 1.628513 | 3.510451 |
| zinc finger and BTB domain containing 38                        | 1.097551 | 1.051621 | 2.671594 |
| growth arrest-specific 8                                        | 0.706242 | 1.311245 | 1.155903 |
| F-box protein 30                                                |          | 1.70199  |          |
| F-box protein 30                                                | 0.354652 | 1.337791 | 1.405091 |
| thyroid hormone receptor interactor 12                          | 0.651631 | 1.626423 | 0.265221 |
| coiled-coil domain containing 18                                | 1.322806 | 0.711407 | 0.518332 |
| endothelin receptor type B                                      | 1.28199  | 2.279385 | 1.275329 |
| histamine N-methyltransferase                                   | 0.754554 | 2.907196 |          |
| guanine nucleotide binding protein (G protein), gamma 13        | 1.075775 | 0.990107 | 0.450184 |
| Phosphoserine phosphatase                                       | 0.651048 | 1.419209 | 2.526461 |
| non-SMC element 2, MMS21 homolog (S. cerevisiae)                | 0.646949 | 1.251025 | 0.301259 |
| leucine rich repeat containing 8 family, member A               |          |          | 2.966912 |
| mutL homolog 1, colon cancer, nonpolyposis type 2 (E. coli)     | 0.727668 | 1.190046 | 0.044616 |
| serpin peptidase inhibitor, clade A (alpha-1 antiproteinase, ai | 2.707632 | 31.84077 |          |
| Peptidyl-tRNA hydrolase 2                                       | 2.915638 | 0.571634 |          |
| bone morphogenetic protein 4                                    |          | 2.15183  |          |
| similar to vitelliform macular dystrophy 2-like 2; bestrophin   | 0.919495 |          | 0.202802 |



|                                                               |          |          |          |
|---------------------------------------------------------------|----------|----------|----------|
| actin, beta-like 2                                            |          |          | 2.058101 |
| Actin binding LIM protein family, member 2                    |          |          | 8.361544 |
| interferon regulatory factor 7                                | 3.762804 | 1.318138 | 2.368789 |
| carosine dipeptidase 1 (metallopeptidase M20 family)          |          |          |          |
| homeodomain interacting protein kinase 2                      |          | 1.57271  | 0.114472 |
| TBC1 domain family, member 8 (with GRAM domain)               | 1.112279 | 0.944744 | 0.955662 |
| protein inhibitor of activated STAT, 4                        | 1.651496 | 0.732961 | 1.668354 |
| GRB2-related adaptor protein                                  | 0.814418 | 1.044856 | 1.776706 |
| p21/Cdc42/Rac1-activated kinase 1 (STE20 homolog, yeast)      | 16.517   | 0.640527 |          |
| Similar to PTD015 protein                                     |          | 0.469295 | 1.324643 |
| similar to Galanin receptor type 1 (GAL1-R) (GALR1)           |          |          |          |
| Carbonic anhydrase VB, mitochondrial                          | 0.825641 | 0.408552 | 1.190468 |
| Similar to RIKEN cDNA 2810039F03                              | 0.69202  | 2.530139 | 1.377197 |
| solute carrier family 22 (organic cation transporter), member | 2.283888 |          |          |
| Chromosome 22 open reading frame 13                           | 2.243055 | 0.887792 | 0.910143 |
| syntaxin binding protein 6 (amisyn)                           | 8.973401 |          | 0.067534 |
| pericentriolar material 1                                     |          | 0.550775 | 0.243366 |
| cathepsin D                                                   | 1.32781  | 1.0965   | 4.153223 |
| cathepsin D                                                   | 1.450422 | 1.157143 | 1.729374 |
| X-ray repair complementing defective repair in Chinese ham    | 0.990988 | 1.296305 | 0.816238 |
| CUB and zona pellucida-like domains 1                         | 0.41765  | 2.558599 |          |
| IQ motif containing GTPase activating protein 2               | 0.438658 | 0.422441 | 0.740537 |
| adaptor-related protein complex 1, sigma 3 subunit            | 0.961809 | 1.232167 | 0.665302 |
| ubiquitin-like, containing PHD and RING finger domains, 1     | 0.75315  | 0.849709 | 0.510965 |
| fucosidase, alpha-L- 2, plasma                                | 1.777634 | 0.489757 | 0.272923 |
| myosin XVI                                                    | 2.660861 | 3.402367 |          |
| glutathione S-transferase omega 1                             | 0.461271 | 5.174922 | 0.745024 |
| Xg blood group                                                |          | 11.61523 |          |
| islet cell autoantigen 1, 69kDa                               | 0.958914 | 0.878078 | 3.677331 |
| suppression of tumorigenicity 5                               | 1.289976 | 0.997472 |          |
| Potassium voltage-gated channel, Isk-related family, membe    | 1.074011 | 0.811996 | 2.825788 |
| Pregnancy-associated plasma protein A, pappalysin 1           |          |          | 0.363791 |
| pregnancy-associated plasma protein A, pappalysin 1           |          |          |          |
| DnaJ (Hsp40) homolog, subfamily C, member 19                  | 1.212787 | 0.354204 | 0.472033 |
| hypothetical gene supported by BX931420                       | 2.257625 | 0.721937 | 0.680016 |
| chromosome 1 open reading frame 80                            | 0.697749 | 0.913608 | 1.103371 |
| transmembrane protein 45A                                     |          |          |          |
| EF-hand calcium binding domain 1                              | 0.694183 | 1.517113 | 1.370928 |
| EF-hand calcium binding domain 1                              |          |          |          |
| chromosome 9 open reading frame 23                            | 0.386    | 0.977439 | 0.614717 |

|                                                                    |          |          |          |
|--------------------------------------------------------------------|----------|----------|----------|
| Chromosome 9 open reading frame 23                                 | 0.498402 | 0.752799 | 2.828818 |
| UBX domain containing 7                                            | 0.530735 |          | 2.034973 |
| UBX domain containing 7                                            | 1.829856 | 1.357207 | 0.69223  |
| transmembrane protein 63A                                          | 1.257174 | 0.960899 |          |
| TIA1 cytotoxic granule-associated RNA binding protein-like         | 56.68898 | 1.89025  | 0.966014 |
| piggyBac transposable element derived 5                            | 2.380467 |          | 17.17781 |
| Solute carrier family 6, member 15                                 | 0.411341 | 1.534722 | 1.056323 |
| Glycolipid transfer protein                                        | 0.99982  | 1.172468 | 2.426773 |
| Polycystic kidney and hepatic disease 1 (autosomal recessive)      | 0.920186 |          | 2.590658 |
| methyltransferase like 8                                           | 0.843583 | 0.757472 | 2.125617 |
| threonyl-tRNA synthetase-like 2                                    | 0.839906 | 0.671686 | 0.639197 |
| threonyl-tRNA synthetase-like 2                                    | 1.659657 | 1.112641 | 1.345514 |
| Similar to gag/env fusion protein                                  |          |          |          |
| zinc fingers and homeoboxes 1                                      | 2.392912 |          | 0.821236 |
| roundabout, axon guidance receptor, homolog 1 (Drosophila)         |          | 0.435614 |          |
| BCL6 co-repressor                                                  |          |          |          |
| glycerol-3-phosphate dehydrogenase 2 (mitochondrial)               | 28.85533 |          |          |
| centrosomal protein 110kDa                                         |          | 0.985418 |          |
| coiled-coil domain containing 45                                   | 1.13222  | 1.241908 | 0.973611 |
| EF-hand domain (C-terminal) containing 2                           |          |          | 0.030468 |
| importin 8                                                         | 0.887117 | 0.890473 | 0.376729 |
| protein tyrosine phosphatase, non-receptor type 2                  | 1.17584  | 1.14052  | 0.650674 |
| chromosome 20 open reading frame 23                                | 2.586802 | 1.21169  | 1.134596 |
| limb bud and heart development homolog (mouse)                     | 0.79847  | 1.407153 | 1.385099 |
| Kruppel-like factor 13                                             | 2.322257 | 0.768321 | 0.52666  |
| Kruppel-like factor 13                                             | 1.432042 | 0.836346 | 0.722782 |
| Dermatan sulfate epimerase                                         | 0.90719  | 1.06523  | 0.463008 |
| chromosome 20 open reading frame 42                                | 1.187414 |          |          |
| similar to mKIAA0746 protein                                       | 0.782533 | 1.099596 | 0.786078 |
| PHD finger protein 6                                               | 0.765833 | 1.666643 | 0.027012 |
| IQ motif and WD repeats 1 /// similar to MSTP055                   | 2.401088 | 2.617749 | 0.377773 |
| integrin, beta 1 (fibronectin receptor, beta polypeptide, antigen) | 2.298912 | 1.959825 | 6.747102 |
| Dephospho-CoA kinase domain containing                             |          |          |          |
| inhibitor of growth family, member 2                               | 0.77031  | 1.084354 | 0.456854 |
| zinc finger protein 518B                                           |          |          | 2.356479 |
| LSM14A, SCD6 homolog A (S. cerevisiae) /// synovial sarcoma        | 2.489842 | 0.84632  | 1.785931 |
| ubiquitin specific peptidase 18                                    | 3.231343 | 2.892901 | 5.609861 |
| structural maintenance of chromosomes 6                            | 0.560755 | 1.032208 | 0.314237 |
| structural maintenance of chromosomes 6                            | 1.849095 | 1.293049 | 0.48367  |
| chromosome 3 open reading frame 23                                 | 1.575704 | 1.150971 | 0.6179   |

|                                                                                |          |          |          |
|--------------------------------------------------------------------------------|----------|----------|----------|
| unkempt homolog (Drosophila)-like                                              | 0.976385 | 0.491509 | 0.854189 |
| Similar to hypothetical protein                                                | 2.73115  |          |          |
| isoleucyl-tRNA synthetase                                                      | 1.060763 | 3.12943  | 0.857517 |
| DCN1, defective in cullin neddylation 1, domain containing                     | 1.800946 | 0.992982 | 0.215073 |
| zinc finger CCCH-type containing 7A                                            | 1.032289 |          | 0.49971  |
| cdk inhibitor CIP1 (p21)                                                       | 1.504687 | 0.906061 | 2.778977 |
| Hypothetical protein LOC771662                                                 | 0.94124  |          | 15.21561 |
| cortactin binding protein 2                                                    | 1.952692 | 1.736845 |          |
| stromal antigen 2                                                              | 0.797815 | 0.663209 | 0.819433 |
| UDP-GlcNAc:betaGal beta-1,3-N-acetylglucosaminyltransfe                        | 0.48432  | 1.19053  | 1.469865 |
| dedicator of cytokinesis 5                                                     |          |          | 0.239782 |
| methionine adenosyltransferase II, beta                                        | 2.485789 | 0.518986 | 0.831961 |
| coiled-coil domain containing 117                                              | 0.969973 | 0.849485 | 2.690901 |
| Pyroglutamyl-peptidase I                                                       |          | 0.886261 | 0.124902 |
| MYST histone acetyltransferase (monocytic leukemia) 3                          | 0.643033 | 1.518518 | 0.454417 |
| BTB and CNC homology 1, basic leucine zipper transcriptio                      | 1.372097 | 2.192202 |          |
| Tetraspanin 9                                                                  |          | 0.200433 |          |
| Solute carrier family 22 (organic cation transporter), member                  | 0.398298 | 0.344872 |          |
| retinoic acid receptor, alpha                                                  | 3.094512 | 0.846833 | 2.669592 |
| breast cancer anti-estrogen resistance 3                                       |          | 1.905544 | 0.729551 |
| exocyst complex component 4                                                    |          |          | 0.419485 |
| Ankyrin repeat domain 46                                                       | 1.107992 | 0.87336  | 0.694668 |
| ankyrin repeat domain 46                                                       | 2.130319 | 0.948817 | 0.446037 |
| acyl-CoA synthetase long-chain family member 4                                 | 1.755952 | 1.612949 | 0.252561 |
| cingulin-like 1                                                                | 0.536104 | 1.140272 | 3.378293 |
| estrogen-related receptor gamma                                                | 0.841048 | 0.889749 | 2.116451 |
| Similar to Rasl11c protein                                                     | 0.248714 |          |          |
| similar to cAMP-specific phosphodiesterase variant PDE4D9                      |          |          | 0.092557 |
| similar to RIKEN cDNA 5830418K08 gene                                          | 1.005855 | 0.97056  | 0.506801 |
| protein phosphatase 1, regulatory (inhibitor) subunit 3D                       | 1.406508 | 1.275634 | 0.356127 |
| similar to Ubiquitin specific peptidase 30 /// ubiquitin specifi               | 0.195174 |          | 0.932479 |
| glycosyltransferase 8 domain containing 2                                      | 1.244417 | 0.965212 | 2.463608 |
| sperm associated antigen 17                                                    | 0.385227 | 1.040348 | 0.453269 |
| sperm associated antigen 17                                                    | 0.854821 | 1.65313  | 1.270091 |
| chemokine (C-C motif) ligand 19                                                | 4.675524 | 3.185068 | 4.97414  |
| Wolfram syndrome 1 (wolframin)                                                 | 0.634124 | 1.287043 | 1.261303 |
| solute carrier family 7 (cationic amino acid transporter, y+ system), member 7 |          |          | 2.17624  |
| solute carrier family 35, member F3                                            |          |          |          |
| CKLF-like MARVEL transmembrane domain containing 6                             | 1.01335  | 2.574094 | 2.179797 |
| Peripheral myelin protein 22                                                   | 1.591968 | 1.072025 | 3.022934 |

|                                                               |          |          |          |
|---------------------------------------------------------------|----------|----------|----------|
| G protein-coupled receptor 160                                | 0.900326 | 1.804136 | 0.433677 |
| Similar to cystatin B                                         |          |          | 2.053084 |
| phosphodiesterase 8A                                          | 0.138771 | 2.346446 | 1.122779 |
| Hypothetical LOC427516                                        |          | 0.756214 | 1.127112 |
| superoxide dismutase 3, extracellular                         | 1.14335  | 1.437364 | 1.723197 |
| Hypothetical protein LOC768709                                | 0.345354 | 1.052207 | 2.740882 |
| integrin beta 1 binding protein (melusin) 2                   | 0.551442 | 1.102258 | 3.031354 |
| coiled-coil domain containing 76                              |          | 0.482204 |          |
| Coiled-coil domain containing 76                              |          | 0.266448 | 0.081715 |
| similar to ovary-specific acidic protein                      | 0.703341 | 1.056699 | 0.698438 |
| myotubularin related protein 7                                |          |          | 13.7287  |
| similar to 1-aminocyclopropane-1-carboxylate synthase         | 0.830032 | 1.07283  | 0.72613  |
| integrin beta 3 binding protein (beta3-endonexin)             | 1.014234 | 1.091061 | 0.768998 |
| integrin, alpha 9                                             | 6.193476 |          |          |
| fibroblast growth factor 7 (keratinocyte growth factor)       | 1.761233 | 1.733953 | 2.008361 |
| fibroblast growth factor 7 (keratinocyte growth factor)       | 1.761342 | 2.326337 | 1.383996 |
| S100 calcium binding protein A10                              | 0.777883 | 1.230915 | 1.999046 |
| syntaxin binding protein 1                                    | 6.749277 | 0.829803 |          |
| similar to Torsin B precursor (Torsin family 1 member B) (F   | 2.309454 | 2.210398 | 1.41677  |
| vasoactive intestinal peptide receptor 2                      | 1.692526 |          | 38.42274 |
| guanine nucleotide binding protein (G protein), alpha inhibit | 0.739826 | 0.961504 | 0.386268 |
| galactose-3-O-sulfotransferase 2                              | 1.107628 | 2.885361 | 1.871599 |
| Cardiolipin synthase 1                                        | 0.977461 | 0.488344 | 0.47837  |
| angiotensin I converting enzyme (peptidyl-dipeptidase A) 2    | 1.380661 | 3.255103 | 3.320804 |
| angiotensin I converting enzyme (peptidyl-dipeptidase A) 2    | 1.352577 | 2.76886  | 2.232194 |
| additional sex combs like 3 (Drosophila)                      | 2.195827 | 0.382605 | 0.846824 |
| chromosome 3 open reading frame 63                            |          |          |          |
| claspin homolog (Xenopus laevis)                              | 0.747702 | 0.834507 | 3.166304 |
| tubulin tyrosine ligase-like family, member 7                 | 0.619274 |          | 2.33912  |
| uroplakin 3A                                                  | 1.849836 | 0.358966 | 0.937383 |
| peripheral myelin protein 2                                   | 0.868935 | 2.35623  | 1.977098 |
| alanyl-tRNA synthetase                                        | 0.803713 | 0.995302 | 2.136248 |
| FERM domain containing 3                                      | 0.847306 | 0.859254 | 1.665372 |
| dual specificity phosphatase and pro isomerase domain conta   | 0.926084 | 1.316718 | 0.101666 |
| small muscle protein, X-linked                                | 2.000266 |          | 2.48489  |
| asparagine-linked glycosylation 13 homolog (S. cerevisiae)    | 0.488552 | 1.100969 | 1.266449 |
| Similar to GPBP-interacting protein 130b                      | 0.548522 |          | 4.412458 |
| filamin A interacting protein 1-like                          | 1.650515 | 0.879852 | 3.500428 |
| leiomodulin 3 (fetal)                                         | 1.893223 | 1.370134 | 3.678527 |
| glutamate-rich 1                                              | 1.351585 | 0.976902 | 0.43026  |

|                                                                |          |          |          |
|----------------------------------------------------------------|----------|----------|----------|
| Mitochondrial trans-2-enoyl-CoA reductase                      | 2.188779 | 0.906604 | 2.450846 |
| endoplasmic reticulum aminopeptidase 1                         | 1.108834 | 0.819731 | 2.61657  |
| Cyclin J                                                       | 1.69714  | 1.138872 | 0.429718 |
| similar to ADP-ribosylarginine hydrolase (ADP-ribose-L-arg     | 0.696756 | 0.896859 | 1.684988 |
| family with sequence similarity 3, member B                    | 1.839878 |          | 20.3824  |
| SEC24 related gene family, member D ( <i>S. cerevisiae</i> )   | 0.121846 |          |          |
| doublecortin-like kinase 1                                     | 0.676206 | 0.574019 | 0.214626 |
| proenkephalin                                                  | 0.848305 | 1.42579  | 2.131197 |
| thioredoxin domain containing 15                               |          | 0.200158 |          |
| STARD3 N-terminal like                                         | 2.32204  | 0.914079 | 0.513009 |
| TGF beta-inducible nuclear protein 1                           | 0.358738 | 0.984442 | 1.242239 |
| chromosome 10 open reading frame 26                            | 0.569822 | 1.666321 | 0.786453 |
| chromosome 9 open reading frame 64                             | 0.421878 | 0.892318 | 1.155992 |
| serine/threonine/tyrosine kinase 1                             | 1.801866 | 1.453226 | 2.314181 |
| phospholipase A2, group X                                      |          | 2.363654 |          |
| Myeloid/lymphoid or mixed-lineage leukemia (trithorax hom      | 1.974274 | 0.771785 | 2.515419 |
| ethanolamine kinase 1                                          | 1.380647 | 0.606694 | 0.437321 |
| elongation protein 2 homolog ( <i>S. cerevisiae</i> )          | 2.476795 | 0.594132 | 0.422045 |
| oral-facial-digital syndrome 1                                 | 1.31202  | 1.15642  | 0.483404 |
| tropomodulin 3 (ubiquitous)                                    | 1.045994 | 1.100279 | 0.3027   |
| aldehyde dehydrogenase 7 family, member A1                     | 0.493678 | 0.804475 | 1.248691 |
| cystatin A (stefin A)                                          | 1.412848 | 1.144852 | 7.17522  |
| Sjogren syndrome antigen B (autoantigen La)                    | 1.179491 | 0.961214 | 0.540324 |
| ectonucleotide pyrophosphatase/phosphodiesterase 2 (autota     | 1.020627 | 0.536668 | 0.545368 |
| G protein-coupled receptor 23                                  | 0.748195 | 0.936333 | 0.070951 |
| G protein-coupled receptor 23                                  | 1.192759 | 0.943255 | 0.036055 |
| peptidylprolyl isomerase C (cyclophilin C)                     | 0.428813 | 1.101878 | 0.803051 |
| potassium channel tetramerisation domain containing 20         | 0.91704  | 0.585997 | 0.391605 |
| potassium channel tetramerisation domain containing 20         | 0.465448 | 1.213263 | 0.348919 |
| mitogen-activated protein kinase 8                             | 0.925577 | 1.023532 | 0.398327 |
| nucleoporin 153kDa                                             | 0.777899 | 0.679655 | 0.775039 |
| testis expressed 2                                             | 0.235345 | 0.933276 | 0.539358 |
| Rieske (Fe-S) domain containing                                |          | 0.527083 | 3.345091 |
| hypothetical LOC418095                                         | 3.410284 | 1.233128 | 1.157958 |
| polymerase (DNA directed) sigma                                | 0.718116 | 0.883794 |          |
| polymerase (DNA directed) sigma                                | 0.657732 | 2.09696  |          |
| ST6 beta-galactosamide alpha-2,6-sialyltransferase 1           | 0.69511  | 1.153887 | 1.98873  |
| BRI3 binding protein                                           | 1.133469 | 1.040799 | 0.322659 |
| coiled-coil domain containing 18 /// similar to Rab6-interacti | 0.986787 | 0.73956  | 0.518767 |
| similar to rat ribosomal protein L9 homologue /// ribosomal j  | 0.893163 | 0.623136 | 0.610626 |

|                                                                |          |          |          |
|----------------------------------------------------------------|----------|----------|----------|
| sterile alpha motif and leucine zipper containing kinase AZK   | 0.764403 | 1.304013 | 4.023024 |
| olfactomedin-like 3                                            | 2.399209 |          | 1.514498 |
| Pyrimidinergic receptor P2Y, G-protein coupled, 6              | 2.252715 | 1.215516 | 1.505559 |
| similar to immunoglobulin-like receptor CHIR-AB1 /// simil     | 1.266094 | 0.647181 | 7.995399 |
| similar to immunoglobulin-like receptor CHIR-AB1 /// simil     | 1.427316 | 0.846471 | 6.26647  |
| discs, large homolog 7 (Drosophila)                            | 0.642726 | 1.241945 | 0.76547  |
| adenylate cyclase 7 /// similar to Adenylate cyclase type 7 (A | 2.111242 | 0.806819 | 2.960471 |
| Similar to interferon, gamma-inducible protein 30              | 0.915132 | 1.093498 | 1.906608 |
| DnaJ (Hsp40) homolog, subfamily C, member 19                   | 1.286463 | 0.489505 | 1.453897 |
| Abhydrolase domain containing 11                               | 1.065923 | 1.062833 | 5.352221 |
| GDP dissociation inhibitor 2                                   | 0.94948  | 1.394005 | 0.25381  |
| similar to CG10964-PA                                          | 0.622199 | 1.2718   | 3.886206 |
| HOP homeobox                                                   | 1.785877 | 1.571629 | 2.330409 |
| HOP homeobox                                                   | 1.610653 | 1.686387 | 2.83929  |
| serine/threonine kinase 16                                     | 0.893908 | 0.855417 | 2.524477 |
| transmembrane protein 35                                       |          |          |          |
| similar to expressed sequence AI847670                         | 1.362328 | 0.703015 | 2.1329   |
| FYVE, RhoGEF and PH domain containing 3                        | 1.343008 | 1.420805 | 0.282666 |
| signal transducer and activator of transcription 1, 91kDa      | 3.209194 | 2.632239 | 3.095561 |
| signal transducer and activator of transcription 1, 91kDa      | 2.736524 | 2.376794 | 2.129059 |
| signal transducer and activator of transcription 1, 91kDa      | 5.503363 | 0.855613 | 2.019932 |
| tripartite motif-containing 65                                 | 1.280014 | 0.903313 | 2.040087 |
| hypothetical LOC428877                                         | 1.135172 | 0.806504 | 0.383288 |
| succinate dehydrogenase complex, subunit D, integral memb      | 8.414972 | 2.551236 | 5.428047 |
| WNT inhibitory factor 1                                        | 1.383592 | 1.662385 | 0.443686 |
| POT1 protection of telomeres 1 homolog (S. pombe)              | 1.021889 | 1.03031  | 0.763953 |
| Similar to LOC443703 protein                                   | 1.790158 | 2.205097 | 1.329081 |
| similar to LOC443703 protein                                   | 0.618088 | 0.639909 | 2.561255 |
| polymerase (DNA directed), beta                                | 0.706845 | 1.242185 | 0.510166 |
| cytochrome P450 A 37                                           | 2.139578 | 3.110683 | 7.007102 |
| hypothetical LOC426615                                         | 96.61513 |          | 0.768893 |
| Hypothetical LOC426615                                         | 332.3778 | 1.498287 | 0.106606 |
| Hypothetical LOC426615                                         | 132.7918 | 0.704371 | 0.157599 |
| PML-RARA regulated adaptor molecule 1                          | 1.162101 | 0.491275 | 0.277791 |
| Rac GTPase activating protein 1                                |          | 12.07892 |          |
| succinate receptor 1                                           | 2.125628 | 1.837989 | 6.183434 |
| dodecenoyl-Coenzyme A delta isomerase (3,2 trans-enoyl-C       | 0.79383  | 1.315775 | 2.337673 |
| chromosome 20 open reading frame 42                            | 1.002824 | 1.478527 | 2.188559 |
| family with sequence similarity 20, member A                   |          |          |          |
| Phytoceramidase, alkaline                                      | 1.152711 | 0.45284  | 2.802056 |

|                                                                 |          |          |          |
|-----------------------------------------------------------------|----------|----------|----------|
| fibrinogen gamma chain                                          | 2.603111 | 1.226294 | 1.094857 |
| glucosaminyl (N-acetyl) transferase family member 7             | 1.554967 | 1.304799 | 2.359837 |
| G protein-coupled receptor 56                                   | 2.113719 | 2.009747 | 1.550772 |
| bactericidal/permeability-increasing protein                    | 1.913009 | 1.438014 | 5.543205 |
| TNF receptor-associated factor 2                                | 1.121205 | 0.454942 | 1.752413 |
| chromatin modifying protein 4C                                  | 0.864731 | 1.210355 | 0.272256 |
| chromatin modifying protein 4C                                  | 1.054328 | 1.471027 | 0.533181 |
| basic helix-loop-helix domain containing, class B, 2            | 1.549631 | 1.465579 | 3.38566  |
| signal peptide peptidase-like 2A                                | 1.275062 | 0.786098 | 0.653271 |
| Tubulin tyrosine ligase-like family, member 11                  | 0.894189 | 0.480842 | 2.402455 |
| TOX high mobility group box family member 3                     | 1.379617 | 0.504645 | 3.538494 |
| TOX high mobility group box family member 3                     | 8.933427 |          | 1.548462 |
| spastic paraplegia 21, maspardin (autosomal recessive, Mast     | 0.742787 | 1.388867 | 0.344949 |
| synovial sarcoma, X breakpoint 2 interacting protein            | 0.462734 | 0.503468 | 0.022785 |
| DENN/MADD domain containing 4A                                  |          |          | 0.383412 |
| synaptogyrin 1                                                  | 1.599492 | 1.139078 | 1.056731 |
| Arylacetamide deacetylase-like 2                                | 1.198243 | 1.487433 | 2.377984 |
| phosphatase, orphan 2                                           | 0.753261 | 0.56726  | 1.247263 |
| similar to hypothetical protein MGC33926                        | 0.37268  | 0.825298 | 0.424672 |
| alanyl-tRNA synthetase domain containing 1                      | 0.547815 | 1.059152 | 2.547482 |
| carbohydrate kinase-like                                        | 1.231322 | 0.723083 | 2.304914 |
| lymphocyte antigen 6 complex, locus E                           | 2.578044 | 2.541309 | 3.04393  |
| hypothetical protein LOC769608 /// hypothetical protein LO      | 1.265683 | 1.457452 | 2.963937 |
| Hypothetical LOC426179                                          | 2.044227 |          | 4.605055 |
| Hypothetical LOC426179                                          | 1.39193  | 1.193512 | 2.077976 |
| homeobox B7                                                     | 0.73515  |          | 1.100484 |
| dishevelled associated activator of morphogenesis 2             | 1.618493 |          | 0.945309 |
| trinucleotide repeat containing 6B                              | 2.017981 | 0.792005 | 0.59485  |
| Growth arrest and DNA-damage-inducible, gamma                   | 1.602383 | 1.526743 | 4.461463 |
| solute carrier family 2 (facilitated glucose transporter), meml | 2.547    | 0.221059 | 1.4725   |
| similar to chromosome 6 open reading frame 119                  | 1.05882  | 0.940285 | 0.473297 |
| tissue factor pathway inhibitor (lipoprotein-associated coagu   | 0.630673 | 0.553458 | 0.189326 |
| tissue factor pathway inhibitor (lipoprotein-associated coagu   | 0.398972 | 0.831451 | 0.288395 |
| Tissue factor pathway inhibitor (lipoprotein-associated coagi   | 0.266476 | 0.50301  | 0.493013 |
| Tissue factor pathway inhibitor (lipoprotein-associated coagi   | 0.263826 | 0.537642 | 0.126641 |
| CDC42 effector protein (Rho GTPase binding) 3                   | 1.002387 | 0.851022 | 0.485902 |
| wings apart-like homolog (Drosophila)                           | 1.086159 | 0.085997 | 0.561403 |
| telomerase reverse transcriptase                                | 0.723309 | 0.443466 | 0.301493 |
| ankyrin repeat domain 13A                                       | 0.730946 | 0.939516 | 0.3567   |
| ring finger and WD repeat domain 2                              | 0.964793 | 0.77745  | 0.798123 |

|                                                              |          |          |          |
|--------------------------------------------------------------|----------|----------|----------|
| transmembrane protein 103                                    | 1.262438 | 1.269966 | 3.326249 |
| PFTAIRE protein kinase 1                                     |          |          |          |
| similar to hairy and enhancer of split 5                     |          |          |          |
| GTP cyclohydrolase I feedback regulator                      | 2.216698 | 0.901115 | 0.764536 |
| Norrie disease (pseudoglioma)                                | 4.075041 |          | 0.83274  |
| Rac GTPase activating protein 1                              | 0.470101 | 1.052272 | 0.176254 |
| transmembrane 6 superfamily member 1                         | 1.104507 | 1.259889 | 1.99238  |
| Calpastatin                                                  | 1.06493  | 0.8708   | 3.382153 |
| interleukin 28 receptor, alpha (interferon, lambda receptor) | 1.242121 | 0.700286 | 0.249901 |
| SH3 domain binding glutamic acid-rich protein                | 1.34343  | 0.470622 | 0.549432 |
| odz, odd Oz/ten-m homolog 4 (Drosophila)                     | 1.314333 |          | 0.806105 |
| C1q and tumor necrosis factor related protein 7              | 1.606763 | 1.659078 | 1.158036 |
| N-myristoyltransferase 1                                     | 0.980864 | 1.413441 | 2.739874 |
| similar to C6orf37                                           | 2.44398  | 1.344919 | 1.048654 |
| signal peptidase complex subunit 1 homolog (S. cerevisiae)   | 1.21613  | 0.311456 | 1.010943 |
| vaccinia related kinase 1                                    | 0.991792 | 1.118932 | 0.415139 |
| selenoprotein N, 1                                           | 0.417733 |          |          |
| selenoprotein N, 1                                           | 0.330003 | 0.725491 | 0.620061 |
| jumonji domain containing 2C                                 | 0.661864 | 0.694731 | 2.351101 |
| chromosome X open reading frame 41                           | 0.847761 | 2.375506 | 1.880375 |
| centromere protein Q                                         | 0.815466 | 1.038654 | 1.126682 |
| Mov10, Moloney leukemia virus 10, homolog (mouse)            | 2.466371 | 1.679052 | 5.067787 |
| protein phosphatase 1, regulatory (inhibitor) subunit 3B     | 1.418735 | 2.162528 |          |
| glycerol kinase                                              |          | 2.475567 |          |
| WW domain containing adaptor with coiled-coil                | 0.560771 | 0.412255 | 1.359185 |
| similar to organic solute transporter beta                   | 0.761985 | 1.680874 | 1.887979 |
| ninjurin 1                                                   | 0.772938 | 0.731369 | 0.335834 |
| ninjurin 1                                                   | 0.96824  | 0.891165 | 0.07561  |
| deoxyribonuclease I-like 3                                   | 1.802928 | 2.041627 | 0.97108  |
| egl nine homolog 3 (C. elegans)                              |          |          |          |
| nicotinate phosphoribosyltransferase domain containing 1     | 1.484657 | 0.615951 | 0.389615 |
| COBL-like 1                                                  | 1.57251  | 3.028829 | 1.086232 |
| Kruppel-like factor 6                                        | 1.070009 | 0.751197 | 1.535955 |
| Synapse defective 1, Rho GTPase, homolog 2 (C. elegans)      | 1.390503 | 1.387949 | 2.129678 |
| transmembrane protein 16A                                    | 2.003951 | 1.084172 | 7.329655 |
| biotinidase                                                  | 0.518117 | 1.532793 | 0.256492 |
| Similar to ARMET protein                                     | 1.733164 | 0.37511  | 0.896593 |
| Similar to ARMET protein                                     |          |          |          |
| nth endonuclease III-like 1 (E. coli)                        |          |          | 0.064052 |
| Hypothetical protein LOC771706                               | 1.345876 | 1.510268 | 1.161488 |



|                                                                     |          |          |          |
|---------------------------------------------------------------------|----------|----------|----------|
| tetraspanin 6                                                       | 1.851925 | 1.4535   | 2.83416  |
| similar to egg envelope component ZPAX                              | 6.909696 |          |          |
| Rho GTPase activating protein 1                                     | 1.082436 | 0.811377 | 2.880493 |
| LIM and senescent cell antigen-like domains 1 /// hypothetical      | 0.61075  | 1.628876 | 1.610734 |
| solute carrier family 7, member 6 opposite strand                   | 1.008958 | 1.015106 | 0.371186 |
| chromosome 9 open reading frame 19                                  | 0.922732 | 1.424231 | 0.474395 |
| chromosome 9 open reading frame 19                                  | 0.936446 | 1.194802 | 0.910139 |
| chromosome 9 open reading frame 19                                  | 0.923866 | 1.222144 | 0.578877 |
| sideroflexin 5                                                      | 0.803705 | 1.328655 | 1.536514 |
| Similar to SLC12A8 cation-chloride cotransporter                    | 2.12782  |          |          |
| cytosolic iron-sulfur protein assembly 1 homolog (S. cerevis        | 0.635858 | 1.181226 | 1.491951 |
| aspartate beta-hydroxylase                                          | 4.515996 |          |          |
| aspartate beta-hydroxylase                                          | 1.120175 | 1.501187 | 2.066569 |
| high-mobility group nucleosome binding domain 1                     | 1.163027 | 1.004993 | 0.429621 |
| Nuclear prelamin A recognition factor                               | 0.913761 | 1.187176 | 7.895663 |
| family with sequence similarity 129, member A                       | 1.7077   | 1.231935 | 0.504189 |
| solute carrier family 4, sodium bicarbonate cotransporter, member 7 |          | 2.948425 | 1.404548 |
| transmembrane protein 57                                            | 0.907022 | 1.113314 | 0.945694 |
| COX assembly mitochondrial protein homolog (S. cerevisiae           | 1.197265 | 1.737948 | 1.002842 |
| COX assembly mitochondrial protein homolog (S. cerevisiae           | 0.964976 | 1.459786 | 0.604324 |
| COX assembly mitochondrial protein homolog (S. cerevisiae           | 0.125114 |          |          |
| membrane protein, palmitoylated 7 (MAGUK p55 subfamily              | 0.265941 | 1.275202 | 0.91081  |
| zinc finger, MYND domain containing 11                              | 0.372195 | 1.146164 | 0.590524 |
| wings apart-like homolog (Drosophila)                               | 1.065379 | 0.830698 | 0.322225 |
| CD99 molecule-like 2                                                | 0.641871 | 0.822951 | 1.258717 |
| TROVE domain family, member 2                                       | 0.832636 | 0.973092 | 0.344733 |
| NOL1/NOP2/Sun domain family, member 3                               | 1.493851 | 0.994344 | 1.315819 |
| RNA (guanine-9-) methyltransferase domain containing 2              | 0.774512 | 1.290228 | 0.5728   |
| basic transcription factor 3                                        | 0.489273 | 1.10327  | 1.494191 |
| carboxypeptidase M                                                  | 1.079593 | 1.418109 | 2.192693 |
| kelch domain containing 8A                                          | 1.303895 | 0.494833 | 0.030115 |
| protein tyrosine phosphatase, receptor type, C                      | 1.073326 | 0.81886  | 0.380654 |
| protein tyrosine phosphatase, receptor type, C                      | 0.946444 | 0.904971 | 0.60896  |
| fibronectin leucine rich transmembrane protein 2                    |          | 0.383628 |          |
| asteroid homolog 1 (Drosophila)                                     | 2.107695 | 0.629753 | 0.858826 |
| adenylate kinase 5                                                  |          | 0.446347 | 1.062582 |
| cannabinoid receptor interacting protein 1                          | 1.974451 | 2.237128 | 0.723428 |
| iron-sulfur cluster assembly 2 homolog (S. cerevisiae)              |          | 0.307473 | 2.225401 |
| kinesin light chain 1                                               | 1.796108 | 1.04949  | 3.736351 |
| kinesin light chain 1                                               | 1.229961 | 0.712001 | 1.465807 |

|                                                                |          |          |          |
|----------------------------------------------------------------|----------|----------|----------|
| potassium channel, subfamily K, member 5                       | 3.686226 | 1.200703 | 3.100918 |
| Immunoglobulin superfamily, member 6                           | 1.811354 | 0.96036  | 0.314592 |
| Wolf-Hirschhorn syndrome candidate 1-like 1                    | 4.783567 | 0.865976 | 1.068602 |
| chromosome 1 open reading frame 35                             | 1.514675 | 1.069657 | 2.222043 |
| Zinc finger, CCHC domain containing 4                          | 2.23166  | 0.585356 | 1.420841 |
| mitochondrial ribosomal protein L53                            | 1.420882 | 1.028374 | 0.493672 |
| basic leucine zipper nuclear factor 1 (JEM-1)                  | 1.3916   | 0.750373 | 0.447362 |
| Trafficking protein particle complex 2-like                    | 1.112711 | 0.849238 | 2.367696 |
| regulator of calcineurin 2                                     | 3.073297 | 0.784506 |          |
| Glypican 5                                                     |          |          | 0.918724 |
| glutaminyI-tRNA synthase (glutamine-hydrolyzing)-like 1        | 1.085595 | 0.757945 | 0.464306 |
| IKAROS family zinc finger 5 (Pegasus)                          |          | 3.900208 | 1.062139 |
| ELMO/CED-12 domain containing 1                                |          | 21.69209 | 2.53368  |
| polymerase (RNA) II (DNA directed) polypeptide C, 33kDa        | 0.506248 | 1.376098 | 2.42517  |
| ring finger protein 11                                         | 1.052441 | 1.056272 | 1.541541 |
| RASD family, member 2                                          | 1.407222 | 1.398491 | 3.933473 |
| Hypothetical LOC419483                                         | 1.090456 | 1.324453 | 2.581435 |
| Secretogranin II (chromogranin C)                              | 0.410419 |          |          |
| Secretogranin II (chromogranin C)                              | 2.599512 | 1.033215 | 3.295616 |
| calcyphosine-like                                              | 0.759425 | 0.971242 | 1.106471 |
| THO complex 2                                                  | 0.970736 | 0.866007 | 0.750382 |
| Dicer1, Dcr-1 homolog (Drosophila)                             | 1.787081 | 0.94939  | 1.324093 |
| adrenomedullin                                                 | 3.02217  | 1.60195  | 3.61758  |
| chromosome 3 open reading frame 34                             | 1.097156 | 0.76026  | 0.830357 |
| glycogenin 1                                                   | 0.668648 | 1.152138 | 2.098987 |
| centrosomal protein 290kDa                                     | 0.375942 | 1.2051   | 0.581421 |
| family with sequence similarity 118, member B                  | 0.91411  | 0.824441 | 0.98649  |
| bystin-like                                                    | 0.638901 | 1.090666 | 2.037614 |
| biphenyl hydrolase-like (serine hydrolase; breast epithelial n | 1.302968 | 1.203549 | 0.370884 |
| Neuron derived neurotrophic factor                             | 2.775887 | 1.318972 | 0.643703 |
| hypothetical LOC416518                                         | 0.779183 | 1.367529 | 0.562251 |
| mitochondrial ribosomal protein S27                            | 0.586874 | 1.204902 | 2.125243 |
| peroxisomal biogenesis factor 16                               | 3.250936 | 0.716134 | 0.668757 |
| peroxisomal biogenesis factor 16                               | 0.937796 | 1.007911 | 1.904758 |
| hypothetical protein LOC769277                                 | 0.398705 |          | 1.398883 |
| oxidoreductase NAD-binding domain containing 1                 | 0.952437 | 1.169917 | 0.380408 |
| Similar to C/EBP-induced protein                               | 0.952382 | 0.788222 | 0.416898 |
| tetraspanin 8                                                  | 2.032493 | 2.743929 | 1.363454 |
| palmdelphin                                                    | 1.68524  | 1.642595 | 1.241231 |
| zinc finger, AN1-type domain 1                                 | 1.027745 | 0.957617 | 0.435618 |

|                                                                            |          |          |          |
|----------------------------------------------------------------------------|----------|----------|----------|
| homolog of rat pragma of Rnd2                                              | 1.552004 | 0.974617 | 2.356305 |
| lecithin retinol acyltransferase (phosphatidylcholine--retinol O-acyltrans |          | 0.40153  |          |
| similar to cylindromatosis (turban tumor syndrome); cylindro               | 6.32585  | 0.694505 |          |
| hypothetical LOC426515                                                     | 1.247381 | 0.867114 | 1.48583  |
| mediator of RNA polymerase II transcription, subunit 31 hor                | 0.699846 | 1.074872 | 0.356985 |
| ceruloplasmin (ferroxidase)                                                |          | 1.258119 | 0.626419 |
| similar to GLP_608_34837_33056                                             | 1.643246 | 1.029263 | 0.400805 |
| purinergic receptor P2X, ligand-gated ion channel, 5                       | 3.597729 | 3.514521 | 6.54902  |
| phosphatidic acid phosphatase type 2                                       | 1.100532 | 1.011611 | 0.486937 |
| solute carrier family 25 (mitochondrial carrier; Graves disease autoantig  |          | 1.370543 | 0.410401 |
| Ras-related associated with diabetes                                       | 1.05347  | 0.276072 | 0.20703  |
| similar to antithrombin 1 B chain                                          |          |          | 2.067765 |
| fibronectin leucine rich transmembrane protein 3                           |          |          |          |
| similar to vesicle amine transport protein 1; membrane prote               | 1.027941 | 2.36398  | 2.362532 |
| Chromosome 6 open reading frame 57                                         | 0.943498 | 0.809576 | 0.543123 |
| polymerase (DNA directed), alpha 1                                         | 0.298269 | 0.831403 | 0.481373 |
| hypothetical gene supported by BX933262; BX935476; CR4                     | 3.193818 | 1.201504 | 3.103493 |
| uncoupling protein 3 (mitochondrial, proton carrier)                       |          |          |          |
| CCR4 carbon catabolite repression 4-like (S. cerevisiae)                   |          |          | 0.463092 |
| receptor (G protein-coupled) activity modifying protein 2                  | 1.438558 | 1.425218 | 3.845367 |
| chromosome 2 open reading frame 34                                         | 1.506244 | 1.900812 |          |
| LSM14A, SCD6 homolog A (S. cerevisiae)                                     | 0.841939 | 0.855406 | 0.727343 |
| olfactomedin 3                                                             | 1.083149 | 1.219177 | 0.487479 |
| Apolipoprotein B mRNA editing enzyme, catalytic polypept                   | 0.690126 | 2.542624 |          |
| SH3 domain binding glutamic acid-rich protein like 2                       | 0.410897 | 0.499545 |          |
| zinc finger protein 207                                                    | 0.884781 | 0.98481  | 0.275988 |
| MYST histone acetyltransferase (monocytic leukemia) 4                      | 1.208759 | 0.599251 | 0.488974 |
| hypothetical gene supported by BX930628                                    | 0.344909 | 0.864704 | 1.078932 |
| protein kinase C and casein kinase substrate in neurons 3                  | 0.651034 | 0.948769 | 0.263261 |
| sushi domain containing 3                                                  | 0.674805 | 0.418402 | 1.089272 |
| RNA binding motif protein 26                                               | 0.323824 | 1.495217 | 0.954667 |
| steroid 5 alpha-reductase 2-like 2                                         | 1.340065 | 0.471023 |          |
| tetratricopeptide repeat domain 14                                         | 1.708553 | 0.710126 | 0.318743 |
| coiled-coil-helix-coiled-coil-helix domain containing 1                    | 0.933507 | 1.162425 | 0.46925  |
| zinc finger protein 294                                                    | 1.044576 | 0.829799 | 0.818364 |
| EGF-like-domain, multiple 7                                                | 1.99337  | 1.398509 | 2.595527 |
| EGF-like-domain, multiple 7                                                | 1.927446 | 1.575732 | 3.304797 |
| Rap guanine nucleotide exchange factor (GEF) 1                             | 1.94707  | 0.418939 | 0.902869 |
| intestinal cell (MAK-like) kinase                                          | 1.155128 | 0.872682 | 0.093875 |
| heterogeneous nuclear ribonucleoprotein L-like                             | 1.075922 | 1.605355 | 0.230313 |

|                                                                |          |          |          |
|----------------------------------------------------------------|----------|----------|----------|
| Heterogeneous nuclear ribonucleoprotein L-like                 | 0.849399 | 2.113966 |          |
| chromosome 12 open reading frame 57                            | 0.6241   | 0.950436 | 1.348844 |
| UBX domain containing 1                                        | 0.997113 | 1.016787 | 0.391802 |
| chromosome X open reading frame 36                             | 0.827823 | 2.531739 | 0.930403 |
| family with sequence similarity 62 (C2 domain containing) r    | 0.808918 | 0.835462 | 0.419577 |
| zinc finger E-box binding homeobox 2                           | 2.579612 | 1.792325 | 1.9938   |
| chromosome 16 open reading frame 42                            | 0.95873  | 0.965424 | 0.653715 |
| DEAD (Asp-Glu-Ala-Asp) box polypeptide 24                      | 0.995621 | 0.987636 | 0.684023 |
| dehydrogenase/reductase (SDR family) X-linked                  | 0.844149 | 1.173592 | 1.650136 |
| lymphatic vessel endothelial hyaluronan receptor 1             | 2.26923  |          | 5.169535 |
| oncostatin M receptor                                          | 1.260106 | 0.927364 | 3.265471 |
| oncostatin M receptor                                          |          | 0.084114 |          |
| chromosome 7 open reading frame 16                             | 1.734778 | 2.565699 | 2.850346 |
| A kinase (PRKA) anchor protein (gravin) 12                     | 35.7444  |          |          |
| craniofacial development protein 1                             | 0.678558 | 1.128996 | 1.517942 |
| chromosome 7 open reading frame 36                             | 1.035906 | 0.707978 | 0.2519   |
| chromosome 7 open reading frame 36                             | 0.938659 | 1.295665 | 2.349138 |
| SPC25, NDC80 kinetochore complex component, homolog (          | 0.84093  | 0.826001 | 0.328836 |
| katanin p60 (ATPase-containing) subunit A 1                    | 0.980712 | 0.817274 | 0.49873  |
| chromosome 13 open reading frame 7                             | 0.535511 | 0.341957 |          |
| rotatin                                                        | 0.683666 | 0.751255 | 0.575593 |
| GIN5 complex subunit 1 (Psf1 homolog)                          | 1.207054 | 0.699302 | 2.485228 |
| Chromosome 4 open reading frame 31                             |          |          | 2.685587 |
| Wolf-Hirschhorn syndrome candidate 1                           |          | 2.003978 |          |
| Lysophosphatidic acid receptor 2                               |          |          |          |
| centromere protein K                                           | 0.334623 | 1.165957 | 0.84629  |
| zinc finger, matrin type 5                                     | 0.780745 | 0.724861 | 1.42346  |
| KDEL (Lys-Asp-Glu-Leu) endoplasmic reticulum protein re        | 2.335109 | 1.669074 | 1.464889 |
| 5'-nucleotidase domain containing 1                            | 0.845255 | 1.188079 | 0.603709 |
| splicing factor, arginine/serine-rich 17A                      | 1.470466 | 0.748009 | 0.50501  |
| calcium/calmodulin-dependent protein kinase IV                 | 0.277881 | 1.466811 |          |
| Kruppel-like factor 3 (basic)                                  | 1.436576 | 0.996267 | 2.257398 |
| N-acylsphingosine amidohydrolase (acid ceramidase)-like        | 2.148952 | 1.464351 | 0.489983 |
| thymidylate synthetase                                         | 0.806934 | 0.988964 | 0.267957 |
| syntaxin 18                                                    | 1.137757 | 0.623807 | 1.111845 |
| acyl-CoA synthetase bubblegum family member 1                  | 0.752355 | 23.32252 | 1.465687 |
| protein tyrosine phosphatase, receptor type, f polypeptide (P' | 0.519619 |          |          |
| protein tyrosine phosphatase, receptor type, f polypeptide (P' | 1.228513 | 0.474607 | 0.318441 |
| nudix (nucleoside diphosphate linked moiety X)-type motif 7    | 1.441717 | 0.574259 | 0.414316 |
| RWD domain containing 2B                                       | 0.794496 | 1.267196 | 0.580942 |

|                                                               |          |          |          |
|---------------------------------------------------------------|----------|----------|----------|
| developing brain homeobox 2                                   | 0.634401 | 1.68437  |          |
| Wiskott-Aldrich syndrome-like                                 | 1.232835 | 0.718511 | 0.483937 |
| Wiskott-Aldrich syndrome-like                                 | 1.588021 | 0.762859 | 0.422163 |
| Hypothetical protein LOC771073                                | 1.022017 | 2.402548 |          |
| KIAA1274                                                      | 0.92541  | 0.878314 | 2.017385 |
| KIAA1274                                                      | 0.872888 | 1.698537 | 0.756512 |
| interleukin-1 receptor-associated kinase 1 binding protein 1  | 1.041672 | 1.319461 | 1.454256 |
| stannin                                                       | 1.361587 | 1.242454 | 1.611609 |
| chick olfactory receptor 4                                    | 0.702779 | 1.155557 | 1.097382 |
| fatty acid binding protein 3, muscle and heart (mammary-der   | 1.069179 | 1.647716 | 4.615017 |
| NADH dehydrogenase (ubiquinone) 1 alpha subcomplex, as        | 0.727102 | 0.91433  | 0.527971 |
| chromosome 15 open reading frame 40                           | 1.271434 | 1.133096 | 0.855972 |
| adenosine deaminase, tRNA-specific 2, TAD2 homolog (S. c      | 0.699953 | 0.923359 | 0.472565 |
| suppressor of variegation 4-20 homolog 1 (Drosophila)         | 11.18386 | 1.407232 |          |
| suppressor of variegation 4-20 homolog 1 (Drosophila)         | 0.835386 | 0.830855 | 0.068355 |
| cytochrome b, ascorbate dependent 3                           | 0.999419 | 1.038856 | 2.105524 |
| V-set and transmembrane domain containing 2A                  |          |          |          |
| muscle, skeletal, receptor tyrosine kinase                    | 1.629223 |          | 2.626553 |
| pleckstrin homology, Sec7 and coiled-coil domains 3           | 0.844043 | 1.137739 | 0.374902 |
| inositol monophosphatase domain containing 1                  | 1.193752 | 0.864109 | 0.441282 |
| chromosome 18 open reading frame 55                           | 1.107197 | 1.110214 | 0.645775 |
| hypothetical LOC423054                                        | 1.016278 | 0.806241 | 0.717075 |
| sorbin and SH3 domain containing 2                            | 5.695766 |          |          |
| apoptosis-inducing factor, mitochondrion-associated, 2        | 1.86374  | 1.238971 | 1.769603 |
| butyrobetaine (gamma), 2-oxoglutarate dioxygenase (gamma      | 1.54453  | 2.023136 | 5.51872  |
| Toll-interleukin 1 receptor (TIR) domain containing adaptor   | 1.638514 | 0.747682 | 1.593015 |
| cyclin-dependent kinase-like 2 (CDC2-related kinase)          | 1.119184 | 1.064435 | 1.699546 |
| calcitonin-related polypeptide alpha                          | 0.9672   | 0.403276 | 1.113857 |
| calcitonin-related polypeptide alpha                          | 2.137164 | 0.898221 | 0.916616 |
| MAX interactor 1                                              | 1.74052  | 1.118839 | 0.975002 |
| adaptor-related protein complex 3, beta 1 subunit             | 0.49334  | 1.333628 | 0.877647 |
| protein-L-isoaspartate (D-aspartate) O-methyltransferase dor  | 0.807213 | 0.645804 | 0.247109 |
| golgi phosphoprotein 3 (coat-protein)                         | 0.80711  | 1.043032 | 1.100112 |
| ankyrin repeat domain 16                                      | 1.198189 | 0.591206 | 2.854092 |
| cytohesin 4                                                   | 1.343957 | 0.424009 | 0.421441 |
| General transcription factor IIE, polypeptide 2, beta 34kDa   | 2.938989 | 1.329738 | 0.357437 |
| Werner syndrome                                               | 1.014342 | 1.096624 | 0.319184 |
| protein tyrosine phosphatase, receptor type, F                | 0.390887 |          |          |
| solute carrier family 13 (sodium-dependent citrate transporte | 0.815306 | 1.248684 |          |
| Similar to photolyase                                         | 1.70636  | 1.077835 | 2.864636 |

|                                                                                              |          |          |          |
|----------------------------------------------------------------------------------------------|----------|----------|----------|
| chromosome 3 open reading frame 39                                                           | 1.075519 | 1.256403 | 1.070288 |
| adipocyte-specific adhesion molecule                                                         | 0.48212  |          |          |
| potassium voltage-gated channel, shaker-related subfamily, $\beta$                           | 1.214099 | 0.966875 | 2.296053 |
| Twist3                                                                                       |          |          | 2.5938   |
| uveal autoantigen with coiled-coil domains and ankyrin repeat                                | 0.289553 |          |          |
| transmembrane protein 213                                                                    | 2.038494 | 2.849042 | 1.751044 |
| zinc finger protein 330                                                                      | 0.906485 | 0.95478  | 0.40843  |
| Transcription factor B1, mitochondrial                                                       | 1.169626 | 1.249943 | 0.844867 |
| transcription factor B1, mitochondrial                                                       | 1.017489 | 0.821485 | 0.414763 |
| Transcription factor B1, mitochondrial                                                       | 2.852271 | 2.187956 | 0.764258 |
| similar to MRC OX-2 antigen homolog                                                          | 1.147548 |          |          |
| adducin 1 (alpha)                                                                            | 1.227936 | 0.786424 | 0.513891 |
| Similar to Disabled homolog 2, mitogen-responsive phosphoprotein (Dr                         | 1.812865 |          | 2.064998 |
| corticotropin releasing hormone binding protein                                              | 0.783587 | 1.602948 | 0.043268 |
| Fanconi anemia, complementation group L                                                      | 1.008239 | 1.027604 | 0.471068 |
| similar to adrenodoxin homolog                                                               | 0.318752 |          | 1.280667 |
| carbohydrate (N-acetylglucosamine 6-O) sulfotransferase 6                                    | 0.633686 | 0.971442 | 2.094256 |
| transmembrane protein 164                                                                    | 0.905377 | 0.600291 | 0.614793 |
| fructose-1,6-bisphosphatase 2                                                                |          |          | 0.134802 |
| proline rich Gla (G-carboxyglutamic acid) 4 (transmembrane                                   | 1.497594 | 0.959616 | 0.499504 |
| similar to K60 protein                                                                       |          |          | 0.491796 |
| ataxin 3                                                                                     | 1.730656 | 0.80354  | 0.442511 |
| Integrin beta 1 binding protein 1                                                            | 1.3981   | 0.574445 | 0.516783 |
| UBX domain containing 7                                                                      | 1.156807 | 1.198562 | 1.29081  |
| similar to germinal center kinase-like kinase                                                | 1.482918 | 1.025566 | 0.524794 |
| EFR3 homolog A (S. cerevisiae)                                                               | 1.610069 | 46.94421 | 0.352073 |
| kinesin family member 21A                                                                    | 0.966903 | 2.039287 | 2.415267 |
| ankyrin repeat domain 10                                                                     | 2.362886 | 0.887774 | 0.406612 |
| chromosome 10 open reading frame 57                                                          | 0.839103 | 1.139139 | 0.248544 |
| mitogen-activated protein kinase kinase kinase 7                                             | 1.574031 | 1.014525 | 0.474084 |
| Splicing factor, arginine/serine-rich 11                                                     | 0.623956 | 1.21036  | 2.221844 |
| chromogranin A (parathyroid secretory protein 1)                                             | 1.471461 | 2.307571 | 5.218212 |
| exosome component 7                                                                          | 1.290159 | 1.111202 | 0.265772 |
| UBX domain containing 2                                                                      | 0.416784 | 1.05829  | 1.360542 |
| formin-like 1                                                                                | 1.973507 | 0.831062 | 1.790032 |
| LYR motif containing 1                                                                       | 1.146742 | 1.089137 | 0.415372 |
| UDP-N-acetyl-alpha-D-galactosamine:polypeptide N-acetylgalactosaminyltransferase             |          |          | 0.058226 |
| relaxin 3                                                                                    | 1.580533 | 0.944189 | 0.167535 |
| sirtuin (silent mating type information regulation 2 homolog)                                | 0.607337 | 1.109316 | 2.645358 |
| myeloid/lymphoid or mixed-lineage leukemia (trithorax homolog, Drosophila); translocated to, |          |          |          |

|                                                               |          |          |          |
|---------------------------------------------------------------|----------|----------|----------|
| RNA binding motif protein 17                                  | 0.75651  | 1.132839 | 0.493035 |
| chromosome 3 open reading frame 37                            | 0.699243 | 0.963194 | 0.246082 |
| small nuclear ribonucleoprotein 35kDa (U11/U12)               | 0.558464 | 13.79748 | 0.437157 |
| protein phosphatase 2 (formerly 2A), regulatory subunit B", l | 0.77282  | 1.038365 | 1.06375  |
| Potassium voltage-gated channel, Isk-related family, membe    | 0.433489 | 1.591784 | 2.160245 |
| sulfatase modifying factor 2                                  | 0.540125 | 0.973323 | 1.381486 |
| B6.1                                                          | 3.354931 | 1.785907 | 0.372141 |
| B6.1                                                          | 1.651439 | 1.050431 | 0.453222 |
| similar to TSG118.1 protein                                   | 1.135431 | 1.339262 | 0.836225 |
| vasohibin 2                                                   | 0.750029 | 0.950091 | 0.250241 |
| similar to hypothetical protein DKFZp434F117.1                | 0.854886 | 3.026327 | 1.349935 |
| Tweety homolog 3 (Drosophila)                                 | 1.264709 | 0.764637 | 0.454742 |
| similar to N-ethylmaleimide-sensitive factor attachment prot  | 1.299051 | 0.714413 | 0.045116 |
| junctional sarcoplasmic reticulum protein 1                   | 1.099513 | 0.57986  | 2.861717 |
| tetraspanin 13                                                | 1.11957  | 1.321382 | 2.475922 |
| GrpE-like 1, mitochondrial (E. coli)                          | 1.571297 | 2.010144 | 0.358134 |
| deoxynucleotidyltransferase, terminal, interacting protein 1  | 0.684916 | 0.985208 | 1.134702 |
| chromosome 9 open reading frame 30                            | 1.951672 |          | 0.49805  |
| zinc finger protein 451                                       | 1.163402 | 0.883505 | 0.250526 |
| Nuclear assembly factor 1 homolog (S. cerevisiae)             |          |          |          |
| Nucleoredoxin-like 2                                          | 0.817324 |          | 3.79685  |
| COMM domain containing 4                                      | 0.554372 | 1.353517 | 1.512323 |
| echinoderm microtubule associated protein like 4              | 1.558443 | 1.474846 | 3.691208 |
| zinc finger, DHHC-type containing 20                          | 1.235698 | 1.10135  | 1.693529 |
| similar to keratin 10; cytokeratin 10                         | 0.584383 | 0.985098 | 0.746786 |
| Plexin domain containing 2                                    | 1.160875 | 2.141556 | 1.658954 |
| LIM homeobox 8                                                | 2.638869 | 1.75568  | 1.980017 |
| interleukin 20 receptor, alpha                                | 1.913035 | 1.402946 | 0.382948 |
| zinc finger, CCHC domain containing 2                         | 1.984381 | 1.051753 | 0.566365 |
| calcineurin-like phosphoesterase domain containing 1          | 0.969855 | 1.342966 | 0.544223 |
| FRAS1 related extracellular matrix 1                          | 0.981934 | 0.370697 | 2.183696 |
| Similar to LOC445864 protein                                  | 1.566138 | 0.791444 | 4.300813 |
| M-phase phosphoprotein 9                                      | 9.358178 | 1.297758 | 0.631399 |
| Nuclear protein localization 4 homolog (S. cerevisiae)        | 1.374361 | 0.915445 | 1.150603 |
| nudix (nucleoside diphosphate linked moiety X)-type motif 2   | 0.241894 | 0.836598 | 1.551666 |
| vacuolar protein sorting 8 homolog (S. cerevisiae)            | 0.407027 | 1.150276 | 1.017128 |
| inositol polyphosphate-4-phosphatase, type II, 105kDa         | 10.68108 | 0.265495 | 1.308266 |
| transmembrane protein with EGF-like and two follistatin-like  | 0.619756 | 1.493172 | 0.312342 |
| choroideremia-like (Rab escort protein 2)                     | 1.098329 | 1.44048  | 0.515865 |
| dermatan sulfate epimerase                                    | 1.088135 | 1.497555 | 0.299121 |

|                                                              |          |          |          |
|--------------------------------------------------------------|----------|----------|----------|
| chromosome 14 open reading frame 153                         | 1.573719 | 0.6647   | 0.198221 |
| chromosome 14 open reading frame 153                         | 0.857793 | 0.776948 | 1.30158  |
| chromosome 14 open reading frame 153                         | 1.291942 | 0.753146 | 0.689037 |
| regulator of G-protein signalling 7                          |          | 0.037625 |          |
| LATS, large tumor suppressor, homolog 1 (Drosophila)         | 1.417178 | 0.787526 | 0.764646 |
| calcium channel, voltage-dependent, alpha 2/delta subunit 1  | 2.456872 |          |          |
| leucine rich repeat containing 42                            | 0.772265 | 0.742343 | 0.122964 |
| formin binding protein 1-like                                | 1.009089 | 1.064399 | 0.700527 |
| Glucocorticoid induced transcript 1                          | 1.959342 | 1.830403 | 3.462423 |
| similar to hypothetical protein FLJ23861                     | 2.888128 |          |          |
| Similar to pyridoxal kinase                                  |          |          |          |
| par-6 partitioning defective 6 homolog beta (C. elegans)     |          |          |          |
| Calnexin                                                     | 1.297868 | 0.913634 | 0.508945 |
| Hypothetical LOC430620                                       | 0.499619 | 1.154139 | 1.378574 |
| Hypothetical LOC415770                                       | 0.771206 | 0.817103 | 0.194316 |
| chromosome 19 open reading frame 40                          | 1.163569 | 0.825865 | 0.255927 |
| programmed cell death 6                                      | 1.209588 | 1.33837  | 1.279743 |
| similar to TGF-beta type II receptor                         | 1.973105 | 0.80765  | 1.59039  |
| serine/threonine kinase 11                                   | 1.009422 | 0.394359 | 2.737152 |
| Hypothetical LOC419381                                       | 1.170812 | 0.806255 |          |
| ras homolog gene family, member J                            | 1.367638 | 0.969829 | 2.562015 |
| WD repeat domain 12                                          | 0.761027 | 1.187183 | 0.455714 |
| transducin-like enhancer of split 4 (E(sp1) homolog, Drosopl | 0.845413 | 1.085992 | 2.016206 |
| complement component 7                                       | 1.337983 |          | 10.83317 |
| tripartite motif-containing 23                               | 1.051092 | 1.472261 | 1.790472 |
| membrane-spanning 4-domains, subfamily A, member 15          | 4.308551 | 1.35516  | 6.19129  |
| Retinoic acid induced 14                                     | 0.44276  |          |          |
| retinoic acid induced 14                                     |          |          | 0.098919 |
| angiogenic factor with G patch and FHA domains 1             | 0.888748 | 0.759275 | 0.633501 |
| similar to DNA segment, Chr 11, Wayne State University 99    | 2.145403 | 0.56681  | 0.672511 |
| NADH dehydrogenase (ubiquinone) Fe-S protein 5, 15kDa (      | 0.332765 | 0.988404 | 0.5968   |
| CD99 molecule                                                | 1.534288 | 1.383471 | 2.346803 |
| host cell factor C2                                          | 0.142277 |          | 0.652121 |
| host cell factor C2                                          | 1.492701 | 0.910458 | 0.505141 |
| WD repeat domain 12                                          | 0.940247 | 1.082033 | 0.454102 |
| Similar to MLL5                                              | 1.58367  | 0.658052 | 0.349097 |
| solute carrier family 45, member 1                           |          | 0.059687 | 1.196212 |
| similar to ARPP-21 protein                                   | 1.223505 | 0.823039 | 0.046724 |
| Similar to ARPP-21 protein                                   | 0.650096 | 0.768707 | 0.092582 |
| nucleophosmin (nucleolar phosphoprotein B23, numatrin)       | 0.773789 | 0.476737 | 0.381954 |



|                                                                        |          |          |          |
|------------------------------------------------------------------------|----------|----------|----------|
| UTP18, small subunit (SSU) processome component, homol                 | 1.590462 | 1.042086 | 0.353779 |
| WD repeat domain 33                                                    | 0.800036 | 0.901879 | 0.280005 |
| hypothetical LOC424434                                                 | 0.738011 | 0.791528 | 1.481178 |
| six transmembrane epithelial antigen of the prostate 1                 |          |          |          |
| 3-phosphoinositide dependent protein kinase-1                          | 0.959452 | 0.93531  | 0.498614 |
| taxilin alpha                                                          | 1.263516 | 1.274802 | 2.269982 |
| proprotein convertase subtilisin/kexin type 5                          |          | 3.247437 |          |
| patatin-like phospholipase domain containing 8                         | 0.836599 | 1.294803 | 0.999155 |
| signal transducer and activator of transcription 1, 91kDa              | 8.107924 | 1.872007 | 4.426861 |
| regulatory factor X domain containing 2                                | 1.090391 | 1.59439  | 0.558426 |
| filamin A interacting protein 1                                        | 0.812328 |          |          |
| suppressor of variegation 4-20 homolog 1 (Drosophila)                  | 1.081373 | 1.402412 | 1.084479 |
| RAD1 homolog (S. pombe)                                                | 0.460133 | 0.968446 | 0.948729 |
| Transmembrane protein 131                                              | 0.895031 | 0.933893 | 0.395488 |
| similar to Intraflagellar transport 74 homolog (Coiled-coil dc         | 0.637892 | 0.993561 | 5.245346 |
| Chromosome 12 open reading frame 43                                    | 0.868232 | 0.383753 | 0.969817 |
| ras homolog gene family, member G (rho G)                              | 1.137426 | 0.979403 | 0.596529 |
| cancer susceptibility candidate 5                                      |          | 1.418971 | 0.787912 |
| similar to Serine/threonine kinase 3 (STE20 homolog, yeast)            | 1.353858 | 0.923187 | 0.778531 |
| exosome component 2                                                    | 0.511794 | 1.157109 | 0.332379 |
| selenoprotein X, 1                                                     |          |          | 0.137424 |
| G protein-coupled receptor 143                                         | 7.84159  |          |          |
| Chromatin modifying protein 5                                          | 0.193161 |          |          |
| development and differentiation enhancing factor 1                     |          | 0.475003 |          |
| jumonji domain containing 2B                                           | 1.148872 | 0.896169 | 0.336036 |
| TNF receptor-associated factor 3 interacting protein 1 /// ubi         | 1.168122 | 0.937045 | 2.467394 |
| similar to delangin isoform A; Nipped-B-like                           | 10.66774 | 1.066183 | 0.447917 |
| dynein, light chain, roadblock-type 2                                  | 0.780357 | 1.329462 | 0.711991 |
| Sodium channel, voltage gated, type VIII, alpha subunit                | 1.217168 | 0.392266 | 0.728743 |
| sodium channel, voltage gated, type VIII, alpha subunit                |          | 0.407274 | 0.416374 |
| ets variant gene 7 (TEL2 oncogene)                                     | 1.942659 | 1.914965 | 5.422186 |
| HEAT repeat containing 5B                                              | 0.725596 | 1.525536 |          |
| OTU domain containing 7A                                               | 2.209754 |          | 6.290063 |
| copine VIII                                                            | 1.068795 | 0.496999 | 1.354688 |
| SLIT-ROBO Rho GTPase activating protein 1                              | 1.040128 | 1.053945 | 3.318611 |
| Opiate receptor-like 1                                                 | 5.444093 |          | 0.965356 |
| LSM11, U7 small nuclear RNA associated                                 | 1.871995 | 0.934301 | 0.682643 |
| NADH dehydrogenase (ubiquinone) 1 alpha subcomplex, 2,                 | 2.315731 | 0.372216 | 1.171619 |
| hypothetical LOC422427                                                 |          | 0.088712 |          |
| nuclear receptor subfamily 3, group C, member 1 (glucocorticoid recept |          | 1.295953 | 2.40549  |

|                                                                |          |          |          |
|----------------------------------------------------------------|----------|----------|----------|
| matrix metalloproteinase 3 (stromelysin 1, progelatinase)      | 0.704262 | 1.333936 | 2.447788 |
| kinesin family member 1B                                       |          | 0.98822  | 0.749117 |
| NUAK family, SNF1-like kinase, 2                               | 1.031147 | 1.045094 | 1.201581 |
| protein tyrosine phosphatase, non-receptor type 13 (APO-1/C    | 3.677011 | 1.585799 | 2.996717 |
| TBC1 domain family, member 14                                  | 0.445213 | 1.13362  | 5.772053 |
| Hypothetical protein LOC769019                                 | 1.653587 | 0.912937 | 1.380049 |
| chromosome 14 open reading frame 79                            |          |          | 3.649565 |
| hyaluronan binding protein 2                                   |          | 0.779541 | 0.475823 |
| PTC7 protein phosphatase homolog (S. cerevisiae)               |          | 0.655496 | 4.446432 |
| Smg-7 homolog, nonsense mediated mRNA decay factor (C.         | 10.20564 |          |          |
| PAS domain containing serine/threonine kinase                  | 1.488485 | 2.163287 | 0.53295  |
| SPARC related modular calcium binding 2                        | 1.595081 | 0.889437 | 0.298009 |
| IQ motif containing K                                          | 0.898408 | 0.795172 |          |
| GATS-like protein 1                                            | 0.72324  | 1.042785 | 0.763063 |
| similar to Hypothetical protein CBG04537                       | 1.669638 | 0.70766  | 0.157915 |
| N-acetylglucosamine-1-phosphate transferase, alpha and beta    | 0.994025 | 0.691587 | 0.154677 |
| tektin 1                                                       |          | 0.598525 | 0.174513 |
| tektin 1                                                       |          | 0.496673 |          |
| UDP-glucose pyrophosphorylase 2                                | 1.521596 |          |          |
| nuclear receptor subfamily 2, group C, member 1                | 0.63622  | 1.379235 | 1.23732  |
| Kv channel interacting protein 1                               | 1.175938 | 1.645818 | 0.043293 |
| chromatin modifying protein 1A                                 | 0.752315 | 1.723534 | 1.620749 |
| ATPase, class VI, type 11B                                     | 0.546697 | 0.467977 | 0.408932 |
| phospholipase A2 receptor 1, 180kDa                            | 1.82463  | 1.414062 | 2.392187 |
| ST6 beta-galactosamide alpha-2,6-sialyltransferase 2           | 0.442587 | 1.589023 | 1.199313 |
| cyclin T2                                                      | 1.163573 | 0.592979 | 0.366854 |
| solute carrier family 35, member B3                            | 0.534374 |          |          |
| NADH dehydrogenase (ubiquinone) Fe-S protein 3, 30kDa (        | 0.2049   | 1.360914 | 0.500224 |
| rhophilin, Rho GTPase binding protein 2                        | 1.319374 | 2.95592  | 1.360128 |
| RAS-like, family 11, member B                                  | 0.437693 | 0.516985 | 0.307945 |
| chromosome 12 open reading frame 11                            | 2.047097 | 1.009003 | 1.158488 |
| NMDA receptor regulated 1-like                                 | 1.159949 | 0.828233 | 0.519137 |
| solute carrier family 35, member B3                            | 0.417519 | 0.554164 | 1.192161 |
| solute carrier family 12 (potassium/chloride transporters), me | 2.429609 | 1.360715 | 1.346947 |
| Sarcoglycan, epsilon                                           | 1.070009 | 0.739962 | 2.000086 |
| structural maintenance of chromosomes flexible hinge doma      | 1.733968 | 1.15318  | 2.137888 |
| vascular cell adhesion molecule 1                              | 4.260043 | 2.514499 | 2.108773 |
| similar to KIAA0896 protein /// similar to progesterin induced | 1.042375 | 0.896965 | 0.699294 |
| elongation factor RNA polymerase II                            | 1.374175 | 0.870489 | 2.667586 |
| Regulation of nuclear pre-mRNA domain containing 1A            | 0.482613 | 0.631684 | 0.645622 |

|                                                                |          |          |          |
|----------------------------------------------------------------|----------|----------|----------|
| neuropeptides B/W receptor 1                                   | 1.385636 | 0.390353 | 0.290927 |
| KIAA1826                                                       | 0.942784 | 0.8968   | 0.498737 |
| myosin IF                                                      | 1.896979 | 1.35399  | 4.219529 |
| serologically defined colon cancer antigen 10                  | 0.302492 | 1.391145 | 2.190134 |
| CD8a molecule                                                  | 0.898291 | 0.706252 | 0.118094 |
| regulator of G-protein signalling 19                           |          | 1.223971 | 0.363047 |
| glucokinase                                                    | 1.220645 | 0.644178 | 9.906418 |
| asparagine-linked glycosylation 10, alpha-1,2-glucosyltransf   | 0.805895 | 2.214168 | 1.241414 |
| lon peptidase 2, peroxisomal                                   | 1.434247 | 1.126449 | 3.237126 |
| sperm associated antigen 9                                     | 1.442008 | 1.141979 | 0.488084 |
| ubiquitin-conjugating enzyme E2A (RAD6 homolog)                | 1.083568 | 1.10508  | 0.323463 |
| ubiquitin-conjugating enzyme E2A (RAD6 homolog)                | 1.143317 | 1.010935 | 0.583474 |
| inositol polyphosphate-5-phosphatase, 75kDa                    | 1.745288 | 1.337924 | 2.536341 |
| Ankyrin repeat and SOCS box-containing 2                       | 1.452392 | 2.357091 | 1.940302 |
| BCL2-antagonist/killer 1                                       | 1.283732 | 1.245776 | 2.601663 |
| chromosome 14 open reading frame 129                           | 0.753481 | 0.840223 | 0.32941  |
| chromosome 21 open reading frame 45                            | 0.785585 | 1.095946 | 0.537473 |
| DBF4 homolog (S. cerevisiae)                                   | 0.539354 | 0.876633 | 0.422414 |
| adaptor-related protein complex 4, epsilon 1 subunit           | 1.703335 | 0.986844 | 0.547021 |
| natural killer-tumor recognition sequence                      | 2.038667 | 1.11996  | 1.053719 |
| Collagen, type XXIV, alpha 1                                   |          | 0.646963 | 0.427476 |
| PTPRF interacting protein, binding protein 1 (liprin beta 1)   | 0.279328 |          |          |
| chloride intracellular channel 4                               | 1.12708  | 0.581992 | 1.499582 |
| Paired related homeobox 2                                      | 2.932353 | 2.210873 | 4.171929 |
| transmembrane protein 214                                      | 0.67229  | 0.853608 | 1.8742   |
| RAB2A, member RAS oncogene family                              | 1.01813  | 0.92822  | 0.39125  |
| Similar to MAP kinase kinase 6b                                | 0.502881 | 0.95299  | 0.345711 |
| leucine-rich PPR-motif containing                              | 14.26784 |          |          |
| activating signal cointegrator 1 complex subunit 3             | 17.47002 | 0.490217 | 2.247327 |
| similar to cisplatin resistance-associated overexpressed prote | 0.99192  | 0.937358 | 0.230494 |
| chromosome 1 open reading frame 77                             | 0.6953   | 0.918923 | 1.572309 |
| DnaJ (Hsp40) homolog, subfamily B, member 4                    |          | 0.286581 |          |
| potassium voltage-gated channel, subfamily H (eag-related),    | 2.186887 | 3.527716 | 1.125297 |
| E74-like factor 1 (ets domain transcription factor)            | 2.064499 | 1.084559 | 0.398835 |
| family with sequence similarity 53, member A                   | 0.998706 | 0.790061 | 0.091593 |
| Sorbin and SH3 domain containing 2                             | 1.620702 |          | 0.465158 |
| cytochrome b5 reductase 4                                      | 0.529123 | 1.736441 | 0.429206 |
| cytochrome b5 reductase 4                                      | 0.693242 | 1.343939 | 0.427283 |
| KIAA1467                                                       |          | 0.842083 | 0.266557 |
| dipeptidyl-peptidase 9                                         | 0.656914 | 1.076533 | 0.549496 |

|                                                                       |          |          |          |
|-----------------------------------------------------------------------|----------|----------|----------|
| non-SMC condensin II complex, subunit G2                              | 0.593064 | 2.060834 | 0.872925 |
| Mevalonate kinase (mevalonic aciduria)                                | 0.404415 | 0.527651 | 2.209155 |
| sema domain, immunoglobulin domain (Ig), transmembrane                | 1.082482 | 1.407617 | 2.66782  |
| OMA1 homolog, zinc metallopeptidase ( <i>S. cerevisiae</i> )          | 0.650367 | 0.974586 | 1.078668 |
| pleckstrin homology-like domain, family B, member 2                   | 2.191874 | 5.058651 |          |
| kinesin family member 20A /// kinesin family member 20A               | 0.483482 | 1.946585 | 1.548153 |
| similar to cytochrome P450 2D20                                       | 1.894849 | 1.642419 | 2.361188 |
| transmembrane protein 41B                                             | 1.319179 | 1.17972  | 2.03613  |
| similar to DKFZP434F2021 protein                                      | 0.774055 | 1.655301 | 0.486915 |
| myxovirus (influenza virus) resistance 1, interferon-inducibl         | 10.26924 | 2.391996 | 4.122604 |
| D-2-hydroxyglutarate dehydrogenase                                    | 0.400077 | 3.567374 | 0.822915 |
| Glutamate decarboxylase 2 (pancreatic islets and brain, 65kDa)        |          | 2.15137  |          |
| similar to T-cell receptor beta                                       | 0.74108  | 0.814277 | 0.303643 |
| similar to T-cell receptor beta chain                                 | 2.147672 | 0.415346 | 0.282274 |
| Transmembrane protein 62                                              | 1.328113 | 0.496443 | 1.085478 |
| Similar to Bardet-Biedl syndrome 7                                    | 1.553497 | 0.881393 | 0.874148 |
| Similar to junctophilin type 2                                        | 2.518762 | 1.202311 | 1.842831 |
| spleen focus forming virus (SFFV) proviral integration onco           | 3.000375 | 1.72354  | 1.645156 |
| Zinc finger CCHC-type and RNA binding motif 1                         | 1.52602  | 0.625429 | 1.617464 |
| influenza virus NS1A binding protein                                  | 0.698768 | 1.376949 | 0.429986 |
| zinc finger protein 512B                                              | 0.398903 | 1.805596 | 1.000106 |
| uridine-cytidine kinase 1-like 1 /// zinc finger protein 512B         | 2.396227 | 1.07751  | 1.007617 |
| chromosome 14 open reading frame 32                                   | 1.107777 | 0.790973 | 2.635435 |
| Epithelial stromal interaction 1 (breast)                             | 4.930083 | 2.12912  | 2.899373 |
| Similar to interleukin 17 receptor C                                  |          |          | 14.97826 |
| Prickle homolog 2 ( <i>Drosophila</i> )                               | 4.512341 | 1.110778 | 2.922391 |
| tectonin beta-propeller repeat containing 1                           | 0.108657 |          |          |
| Mitogen-activated protein kinase kinase kinase 7                      | 0.463683 | 1.017902 | 0.908878 |
| similar to LOC402959 protein                                          |          |          | 2.628918 |
| TIP41, TOR signalling pathway regulator-like ( <i>S. cerevisiae</i> ) | 1.151407 |          | 0.109938 |
| phosphotriesterase related                                            | 0.883034 | 1.018917 | 0.604493 |
| Tubulin, delta 1                                                      | 3.665586 | 1.26618  | 5.979248 |
| splicing factor 3b, subunit 3, 130kDa                                 | 1.427488 | 1.498285 | 0.427086 |
| Ankyrin 2, neuronal                                                   | 0.97196  | 0.821166 | 2.104384 |
| Hypothetical protein LOC768612                                        | 0.296315 | 0.706968 | 0.585829 |
| Amyloid beta (A4) precursor protein-binding, family B, men            | 0.866665 | 0.723226 | 1.64194  |
| Microtubule associated serine/threonine kinase 3                      | 2.248463 |          |          |
| Microtubule associated serine/threonine kinase 3                      | 1.834145 | 1.112211 | 2.143397 |
| ribosomal protein S6 kinase-like 1                                    | 1.20837  | 0.840348 | 2.921988 |
| dystrobrevin binding protein 1                                        | 1.153098 | 0.826309 |          |

|                                                               |          |          |          |
|---------------------------------------------------------------|----------|----------|----------|
| Regulatory factor X-associated protein                        | 1.323045 | 1.254221 | 0.399604 |
| nudix (nucleoside diphosphate linked moiety X)-type motif 4   | 0.744753 | 3.968769 | 1.262131 |
| Cell division cycle 37 homolog (S. cerevisiae)-like 1         |          |          |          |
| Cell division cycle 37 homolog (S. cerevisiae)-like 1         | 1.818467 | 0.836608 |          |
| Protein phosphatase 3 (formerly 2B), catalytic subunit, alpha | 1.253335 | 1.206865 | 2.253898 |
| Protein phosphatase 3 (formerly 2B), catalytic subunit, alpha | 1.157472 | 1.297632 | 1.771118 |
| tetratricopeptide repeat domain 33                            | 0.639301 | 1.433599 | 2.94635  |
| transmembrane protein 63A                                     | 1.227748 | 0.903257 | 0.788042 |
| Similar to putative RIN zinc finger protein                   | 1.032698 | 0.544326 | 0.288224 |
| exonuclease domain containing 1                               | 0.880359 | 1.137066 | 0.562016 |
| TatD DNase domain containing 1                                | 0.523004 | 0.666467 | 0.45469  |
| KIAA1841                                                      | 2.35735  | 0.992008 | 1.105513 |
| testis derived transcript (3 LIM domains)                     | 1.224243 | 0.795042 | 0.294258 |
| Hypothetical LOC421552                                        | 2.669884 | 1.005766 | 0.705318 |
| target of myb1 (chicken)-like 1                               | 2.321727 | 1.646101 | 2.29156  |
| sphingosine-1-phosphate receptor 1                            | 2.158198 |          |          |
| RAB guanine nucleotide exchange factor (GEF) 1                | 1.346313 | 0.367959 |          |
| sorting nexin 8                                               |          | 0.103466 |          |
| beta-2-microglobulin                                          | 0.947635 | 1.168715 | 1.571804 |
| Beta-2-microglobulin                                          | 1.19371  | 1.844615 | 3.307076 |
| hypothetical protein LOC768499                                | 1.072801 | 1.284478 | 2.099978 |
| thioredoxin domain containing 13                              | 0.605812 | 0.82306  | 0.471722 |
| additional sex combs like 3 (Drosophila)                      | 1.042715 | 0.511571 | 0.313404 |
| aryl hydrocarbon receptor nuclear translocator-like           | 1.966161 | 0.707752 | 0.955468 |
| ring finger protein, transmembrane 1                          | 1.267161 | 0.791023 | 0.733565 |
| oncoprotein induced transcript 3                              | 1.730795 | 1.225661 | 2.887144 |
| UDP-Gal:betaGlcNAc beta 1,4- galactosyltransferase, polyp     | 2.481262 | 1.029618 | 0.563525 |
| outer dense fiber of sperm tails 2                            | 1.682258 | 0.598933 | 0.364308 |
| beta-1,4-N-acetyl-galactosaminyl transferase 3                |          |          | 1.9317   |
| vacuolar protein sorting 26 homolog B (S. pombe)              | 1.607509 | 0.86861  | 2.912128 |
| Integrin beta 1 binding protein 3                             | 1.524414 | 0.853616 | 1.083287 |
| chromosome 1 open reading frame 9                             | 0.055253 |          |          |
| Prohibitin                                                    | 0.995308 | 0.636994 | 1.500567 |
| Insulin-like growth factor 2 mRNA binding protein 3           | 1.199314 | 1.024144 | 0.441275 |
| Bardet-Biedl syndrome 12                                      | 1.278904 | 1.007052 | 0.203313 |
| chromosome 4 open reading frame 18                            | 1.898009 |          | 2.198163 |
| hippocampus abundant transcript 1                             | 1.167135 | 0.852975 | 0.300562 |
| ST8 alpha-N-acetyl-neuraminide alpha-2,8-sialyltransferase 6  |          |          | 0.327105 |
| COMM domain containing 9                                      |          | 2.541128 |          |
| Similar to pleckstrin homology domain containing, family H    | 0.793133 | 3.043039 |          |

|                                                                     |          |          |          |
|---------------------------------------------------------------------|----------|----------|----------|
| Thiosulfate sulfurtransferase (rhodanese)                           | 0.345977 |          |          |
| mesoderm development candidate 2                                    | 0.911804 | 1.327775 | 2.135895 |
| solute carrier family 4, anion exchanger, member 2 (erythrocyte)    | 0.993679 | 0.747909 | 1.99738  |
| zinc finger, CCHC domain containing 7                               | 0.827618 | 0.926141 | 1.062303 |
| GTPase activating Rap/RanGAP domain-like 3                          | 0.965024 | 1.127903 | 1.478947 |
| GTPase activating Rap/RanGAP domain-like 3                          | 1.047098 | 0.636478 | 0.244717 |
| chromosome 1 open reading frame 41                                  | 0.253868 | 1.276835 | 0.274495 |
| interferon stimulated exonuclease gene 20kDa-like 2                 | 0.939319 | 0.929647 | 1.917976 |
| angiomin like 2                                                     | 1.424139 | 1.19621  | 2.214417 |
| smooth muscle protein phosphatase type 1-binding subunit            | 0.730528 | 0.889284 | 2.185852 |
| smooth muscle protein phosphatase type 1-binding subunit            | 0.634693 | 0.851427 | 0.349434 |
| chondroitin sulfate N-acetylgalactosaminyltransferase 1             |          | 0.469663 | 0.973716 |
| inositol polyphosphate-5-phosphatase F                              | 0.916208 | 0.955844 | 0.538775 |
| Hypothetical LOC430303                                              | 1.916321 |          |          |
| similar to collagen, type XXVII, alpha 1                            | 1.043312 |          |          |
| Similar to RIKEN cDNA 1110007C09                                    | 0.150966 |          |          |
| leucine-rich repeats and calponin homology (CH) domain containing 1 | 1.11697  | 0.841571 | 2.354608 |
| nuclear factor (erythroid-derived 2)-like 1                         | 2.429757 | 0.735943 | 0.827937 |
| zinc finger, CCHC domain containing 11                              | 2.088253 | 11.86587 |          |
| cleavage and polyadenylation specific factor 3-like                 | 0.784857 | 0.76148  | 0.740895 |
| Oxysterol binding protein-like 2                                    | 0.922981 | 0.940434 | 1.432034 |
| adducin 3 (gamma)                                                   | 1.788344 | 1.677665 | 2.630287 |
| kinesin family member 5B                                            | 0.981042 | 0.557295 | 0.446781 |
| sodium channel and clathrin linker 1                                | 1.690716 | 0.84636  | 0.372255 |
| R3H domain containing 1                                             | 0.832756 | 0.727919 | 0.481354 |
| phosphomannomutase 2                                                | 0.998017 | 0.911276 | 0.948091 |
| RNA binding motif protein 5                                         | 1.035439 | 0.768115 | 0.456691 |
| ARV1 homolog (S. cerevisiae)                                        | 1.246262 | 0.764211 | 0.638895 |
| regulator of G-protein signaling 9                                  | 0.446706 |          |          |
| radixin                                                             | 0.861163 | 1.148506 | 1.463467 |
| nexilin (F actin binding protein)                                   | 1.120787 | 1.197685 | 0.514803 |
| nexilin (F actin binding protein)                                   | 1.591478 | 0.405692 | 0.608835 |
| osteocrin                                                           | 2.029107 |          |          |
| YTH domain containing 2                                             | 0.397379 | 0.707234 |          |
| YTH domain containing 2                                             | 0.485759 | 1.356214 | 0.468741 |
| suppressor of variegation 3-9 homolog 2 (Drosophila)                | 1.126257 | 0.846704 | 0.445345 |
| heterogeneous nuclear ribonucleoprotein H3 (2H9)                    | 1.229547 | 0.888475 | 0.610868 |
| hypothetical protein LOC771290                                      |          | 0.476903 |          |
| Rho GTPase activating protein 24                                    | 2.867775 | 1.533099 | 2.526354 |
| F-box and leucine-rich repeat protein 22                            | 1.0167   | 0.943899 | 0.080506 |

|                                                                 |          |          |          |
|-----------------------------------------------------------------|----------|----------|----------|
| interleukin 15                                                  | 2.043946 | 1.440734 | 1.393769 |
| C2 calcium-dependent domain containing 2                        | 1.313201 | 1.001526 | 0.612591 |
| creatine kinase, mitochondrial 1A                               | 1.059083 | 2.15299  | 20.39546 |
| similar to ovary-specific acidic protein                        | 0.339305 | 0.787932 | 0.085346 |
| centrosomal protein 152kDa                                      | 1.34597  | 0.882212 | 0.130419 |
| neuregulin 1                                                    | 4.555925 | 1.038488 | 0.557911 |
| Splicing factor, arginine/serine-rich 3                         | 0.663083 | 1.253825 | 0.251072 |
| PHD finger protein 11                                           | 2.956257 | 1.561289 | 1.627752 |
| Hypothetical protein LOC768787                                  | 1.345691 | 1.393027 | 2.42269  |
| RAB21, member RAS oncogene family                               | 0.845464 | 1.382657 | 0.768621 |
| RAB21, member RAS oncogene family                               | 0.649007 | 0.785962 | 0.439527 |
| lamin B receptor                                                | 1.160836 | 1.322778 | 2.119084 |
| solute carrier family 7 (cationic amino acid transporter, y+ sy | 0.615649 | 1.661412 | 2.058445 |
| Solute carrier family 31 (copper transporters), member 1        | 1.161539 | 1.447238 | 1.839763 |
| Rho-associated, coiled-coil containing protein kinase 1         | 1.455281 | 0.937299 | 0.768845 |
| N-acetylneuraminic acid phosphatase                             | 2.345052 | 1.268209 | 0.939959 |
| coiled-coil domain containing 47                                | 0.851656 | 0.871725 | 0.612404 |
| aminopeptidase puromycin sensitive                              | 0.868583 | 1.091792 | 2.196715 |
| nuclear receptor coactivator 7                                  | 2.220336 | 0.512371 | 0.186463 |
| fibronectin type III domain containing 3B                       | 32.46056 | 0.835006 | 0.696436 |
| RAD52 motif 1                                                   | 1.679404 | 0.333531 | 0.982779 |
| KIAA1946                                                        |          | 0.71457  |          |
| similar to LOC495836 protein                                    | 0.897411 | 1.018504 | 0.654861 |
| folliculin-like 4                                               | 1.033661 | 0.7803   | 0.391612 |
| zinc finger protein 92 homolog (mouse)                          | 1.089435 | 0.674918 | 0.249181 |
| zinc finger protein 92 homolog (mouse)                          | 0.931666 | 0.705785 | 0.266004 |
| NIMA (never in mitosis gene a)-related kinase 1                 | 1.026823 | 0.917177 | 3.189606 |
| CD36 molecule (thrombospondin receptor)                         | 1.463913 | 1.764458 | 3.202619 |
| triple functional domain (PTPRF interacting)                    | 1.994899 | 1.732823 | 2.484618 |
| family with sequence similarity 20, member A                    | 1.055413 | 1.00217  | 2.848433 |
| family with sequence similarity 20, member A                    | 0.893146 | 1.102081 | 3.083435 |
| Nuclear protein localization 4 homolog (S. cerevisiae)          | 0.795652 | 1.38445  | 3.335456 |
| similar to TB2 /// receptor accessory protein 5                 | 0.329871 | 0.398446 | 3.842939 |
| RAB31, member RAS oncogene family                               | 0.75348  | 1.364228 | 1.398861 |
| mucin protein                                                   |          |          | 0.398349 |
| Ribosomal protein L9                                            | 0.670387 | 0.975876 | 2.06751  |
| poly (ADP-ribose) polymerase family, member 11                  | 1.370352 | 1.003076 | 0.682155 |
| Tva receptor                                                    | 5.52031  | 1.208756 | 0.269263 |
| zinc finger, MYND-type containing 8                             | 1.458843 | 1.130137 | 0.536397 |
| acyl-Coenzyme A binding domain containing 7                     | 1.349808 | 1.062948 | 4.316983 |

|                                                                                |          |          |          |
|--------------------------------------------------------------------------------|----------|----------|----------|
| CD38 molecule                                                                  | 2.29983  | 2.616639 | 7.514364 |
| utrophin                                                                       | 0.716688 | 1.54997  | 0.338025 |
| NKf3 kinase family member /// tetraspanin 3                                    | 1.362371 | 0.978923 | 0.474667 |
| programmed cell death 6 interacting protein                                    | 1.056324 | 0.574188 | 0.452192 |
| family with sequence similarity 40, member B                                   | 4.4402   | 0.1478   | 1.440497 |
| similar to RIKEN cDNA C030048B08                                               |          | 1.090271 |          |
| Acyl-CoA synthetase medium-chain family member 5                               | 13.44152 |          | 2.232328 |
| Non-SMC element 1 homolog (S. cerevisiae)                                      | 2.196021 | 0.479731 | 0.432186 |
| purinergic receptor P2X, ligand-gated ion channel, 4                           | 3.0303   | 0.906655 | 2.063336 |
| CKLF-like MARVEL transmembrane domain containing 4                             | 0.519903 | 1.116047 | 0.297439 |
| endothelin receptor type A                                                     | 2.008922 | 1.968185 | 4.046221 |
| protein tyrosine phosphatase, non-receptor type 3                              | 1.105152 | 2.710811 | 2.556939 |
| EF-hand domain family, member A2                                               | 0.604902 | 0.758577 | 1.67038  |
| Matrix metalloproteinase 23B                                                   | 0.952054 | 1.624427 | 5.303098 |
| Transmembrane protein 14C                                                      | 0.699833 | 1.09852  | 0.378691 |
| glyceraldehyde-3-phosphate dehydrogenase                                       | 0.595423 | 1.1488   | 1.42226  |
| GULP, engulfment adaptor PTB domain containing 1                               | 1.003157 |          | 2.083728 |
| HAUS augmin-like complex, subunit 8                                            | 0.435298 |          |          |
| signal recognition particle 54kDa                                              | 0.797765 | 2.925666 | 0.546634 |
| histone deacetylase 9                                                          | 1.219292 | 0.637549 | 0.230395 |
| heterogeneous nuclear ribonucleoprotein L-like                                 | 1.413049 | 0.599017 | 0.342361 |
| endothelin receptor B subtype 2                                                |          | 0.147691 |          |
| carboxypeptidase A6                                                            | 2.015069 |          |          |
| glycerol-3-phosphate dehydrogenase 1-like                                      | 0.745332 | 1.073277 | 0.386972 |
| similar to testis specific leucine rich repeat protein                         | 0.214826 | 2.405203 |          |
| dynein, axonemal, heavy chain 10                                               |          |          | 1.538211 |
| UDP-N-acetyl-alpha-D-galactosamine:polypeptide N-acetylglucosamine 4-epimerase | 1.686555 | 0.86785  | 0.579985 |
| exportin 4                                                                     | 1.426801 | 0.816761 | 0.462307 |
| tetratricopeptide repeat, ankyrin repeat and coiled-coil containing 1          |          |          | 0.075616 |
| deformed epidermal autoregulatory factor 1 (Drosophila)                        | 5.328695 |          |          |
| deformed epidermal autoregulatory factor 1 (Drosophila)                        | 1.555046 |          |          |
| family with sequence similarity 73, member B                                   |          | 2.640437 |          |
| family with sequence similarity 69, member B                                   | 0.893609 | 1.230211 | 2.079089 |
| armadillo repeat containing 8                                                  |          | 2.148518 | 0.713058 |
| AT hook containing transcription factor 1 pseudogene                           | 1.557076 | 0.587918 | 0.180543 |
| Solute carrier organic anion transporter family, member 5A1                    | 0.142846 |          |          |
| KIAA1841                                                                       | 0.486896 | 1.944882 | 0.761829 |
| zinc finger protein 532                                                        |          | 25.03421 |          |
| Bardet-Biedl syndrome 5                                                        | 0.87221  | 0.292237 |          |
| Bardet-Biedl syndrome 5                                                        |          |          | 0.39443  |



|                                                                                        |          |          |          |
|----------------------------------------------------------------------------------------|----------|----------|----------|
| coiled-coil domain containing 111                                                      | 1.179465 | 1.014419 | 0.432485 |
| glycosyltransferase 1 domain containing 1                                              | 1.019943 |          | 4.581154 |
| similar to CG30016-PA                                                                  | 0.381676 | 1.419822 | 0.985106 |
| trafficking protein, kinesin binding 1                                                 | 2.164206 | 1.40805  | 2.204471 |
| Xeroderma pigmentosum, complementation group C                                         |          | 1.047445 |          |
| transcription factor 7 (T-cell specific, HMG-box)                                      |          | 0.67867  | 0.476565 |
| PWWP domain containing 2A                                                              | 1.154319 | 0.871018 | 0.531307 |
| paired-like homeodomain 1                                                              | 1.500834 | 2.656543 |          |
| Hypothetical protein LOC769056                                                         | 2.103241 | 1.136378 |          |
| CD93 molecule                                                                          | 1.099821 | 0.888416 | 3.187136 |
| TBC1 domain family, member 9 (with GRAM domain)                                        |          |          | 8.336872 |
| cystathionine-beta-synthase                                                            | 0.984206 | 0.433693 |          |
| similar to glycoprotein                                                                |          | 3.936462 |          |
| Gal 8                                                                                  |          |          |          |
| Gal 8                                                                                  | 1.223037 | 1.271217 | 2.442679 |
| chromosome 13 open reading frame 24                                                    | 0.612256 | 1.565983 | 0.67804  |
| RNA binding motif protein 46                                                           | 1.165417 | 2.056679 | 0.097889 |
| lipoma HMGIC fusion partner-like 5                                                     | 0.37051  | 1.592436 | 4.412549 |
| S phase cyclin A-associated protein in the ER                                          |          |          | 0.310225 |
| similar to mitochondrial fission regulator 1 /// mitochondrial fission regu            |          | 2.104493 |          |
| sema domain, immunoglobulin domain (Ig), short basic domain, secreted, (semaphorin) 3F |          |          |          |
| transcription factor 7-like 1 (T-cell specific, HMG-box)                               |          |          |          |
| spastin                                                                                | 1.292519 | 0.581217 | 0.370916 |
| DENN/MADD domain containing 4C                                                         | 1.580515 | 0.395959 | 0.33537  |
| Latent transforming growth factor beta binding protein 3                               |          |          |          |
| sodium channel, voltage gated, type VIII, alpha subunit                                |          |          | 0.450978 |
| SAP30-like                                                                             | 1.206379 |          | 5.523506 |
| Solute carrier family 16, member 12 (monocarboxylic acid tr                            | 1.086749 | 3.194597 | 0.977495 |
| thyroid hormone responsive (SPOT14 homolog, rat)                                       | 1.367697 | 1.327044 | 3.99248  |
| hypothetical gene supported by CR353428                                                |          |          |          |
| multiple coagulation factor deficiency 2                                               | 1.671427 | 1.502171 | 0.475495 |
| lin-28 homolog B (C. elegans)                                                          | 0.444985 | 0.786293 | 0.62715  |
| similar to immune costimulatory protein B7-H4                                          | 0.633243 | 1.083491 | 0.08541  |
| similar to FERM, RhoGEF, and pleckstrin domain protein 1                               | 1.363062 |          | 0.28898  |
| DEP domain containing 6                                                                | 1.132565 | 0.943223 | 4.233838 |
| myotubularin related protein 12                                                        | 0.921807 | 0.783151 |          |
| CD72 molecule                                                                          | 2.037429 | 1.801361 | 1.045068 |
| 7-dehydrocholesterol reductase                                                         |          | 0.59453  | 0.220421 |
| AHNAK nucleoprotein 2                                                                  |          | 0.63889  | 2.095394 |
| activating transcription factor 7 interacting protein                                  | 1.106547 | 1.037323 | 0.704677 |

|                                                                     |          |          |          |
|---------------------------------------------------------------------|----------|----------|----------|
| similar to delangin isoform A; Nipped-B-like                        | 1.70768  | 0.890919 | 0.68517  |
| hypothetical protein LOC771290                                      | 0.117501 |          |          |
| Nucleolar protein with MIF4G domain 1                               | 0.730133 | 1.056673 | 0.474387 |
| Cdk5 and Abl enzyme substrate 2                                     | 0.569707 | 0.695455 |          |
| Nance-Horan syndrome (congenital cataracts and dental anomalies)    | 1.656165 | 0.816491 | 0.078706 |
| Development and differentiation enhancing factor 1                  | 1.214459 | 0.669182 | 0.334355 |
| tensin 3                                                            |          |          | 0.274867 |
| tensin 3                                                            | 0.639407 | 1.255818 | 0.508625 |
| Hypothetical protein LOC769469                                      | 1.137697 | 1.60148  | 3.219409 |
| contactin associated protein-like 5                                 | 0.324793 | 0.591942 | 0.630493 |
| Ankyrin repeat domain 34A                                           | 0.147572 |          |          |
| protein tyrosine phosphatase, receptor type, O                      | 5.857042 | 1.360406 |          |
| Hypothetical LOC425403                                              | 2.163285 | 1.144413 | 1.690212 |
| MLF1 interacting protein                                            | 0.368738 | 1.135026 | 0.481878 |
| MLF1 interacting protein                                            | 0.859336 | 0.969879 | 0.759156 |
| Notch homolog 2 (Drosophila)                                        |          |          |          |
| Low density lipoprotein receptor class A domain containing          | 0.561763 | 0.376437 | 0.483026 |
| Fanconi anemia, complementation group B                             | 0.849062 | 1.718559 | 1.593857 |
| microtubule-associated protein 1A                                   | 9.813943 |          |          |
| hypothetical gene supported by CR352862                             | 1.683043 | 1.274781 | 1.535463 |
| phosphodiesterase 5A, cGMP-specific                                 | 23.01367 |          | 0.345373 |
| secretin                                                            | 0.663747 | 3.022152 | 4.235093 |
| dual specificity phosphatase 22                                     |          | 0.699716 | 4.068555 |
| RAS p21 protein activator (GTPase activating protein) 1             | 0.759899 | 0.858867 | 3.177951 |
| melanocortin 5 receptor                                             |          | 1.153757 | 3.426947 |
| transforming growth factor, beta receptor I (activin A receptor)    | 1.242219 | 0.787823 | 0.359868 |
| GRB2-associated binding protein 2                                   | 0.501674 |          |          |
| myotubularin related protein 6                                      | 0.627782 | 2.746619 | 0.876392 |
| similar to KIAA0294                                                 |          | 1.582721 |          |
| fibroblast growth factor receptor 2                                 | 1.432092 |          | 8.890774 |
| chromosome 13 open reading frame 15                                 | 1.617617 | 1.730833 | 0.762319 |
| golgin B1, golgi integral membrane protein                          | 0.313328 |          |          |
| hypothetical protein LOC771050 /// hypothetical protein LOC771050   | 0.976061 | 1.428205 | 2.158596 |
| renal tumor antigen                                                 | 3.124738 |          |          |
| pyridine nucleotide-disulphide oxidoreductase domain 1              | 0.858573 | 1.308578 | 0.404756 |
| Guanine nucleotide binding protein (G protein), alpha z polypeptide | 0.866038 | 0.96254  | 0.391644 |
| guanine nucleotide binding protein (G protein), alpha z polypeptide |          | 0.44954  |          |
| urotensin 2                                                         | 0.606565 | 0.800722 | 1.502815 |
| adenylate cyclase 5                                                 |          | 0.282361 | 1.440866 |
| phosphodiesterase 7B                                                | 1.656824 | 1.746252 | 2.14529  |

|                                                                 |          |          |          |
|-----------------------------------------------------------------|----------|----------|----------|
| cytochrome P450, family 2, subfamily R, polypeptide 1           | 0.779153 | 0.639295 | 0.812269 |
| Sprouty-related, EVH1 domain containing 2 /// Trinucleotide     | 2.031867 | 1.336419 | 1.814876 |
| General transcription factor IIIC, polypeptide 4, 90kDa         |          | 2.340397 |          |
| ectonucleoside triphosphate diphosphohydrolase 8                | 1.313183 | 0.877531 | 1.523924 |
| intraflagellar transport 122 homolog (Chlamydomonas)            | 0.593269 |          | 0.287107 |
| dual-specificity tyrosine-(Y)-phosphorylation regulated kina    | 1.299765 | 0.939399 | 0.238652 |
| formin binding protein 4                                        | 0.65152  | 0.832773 | 0.923568 |
| hypothetical LOC426829 /// hypothetical protein LOC76998        | 0.784489 | 0.483337 | 0.996314 |
| RNA binding motif protein 12                                    |          | 2.006184 |          |
| Similar to Chromosome 4 open reading frame 32                   | 0.945265 | 0.86597  | 0.216444 |
| LTV1 homolog (S. cerevisiae)                                    | 0.708664 | 1.097843 | 0.697124 |
| Phosphatase and tensin homolog                                  | 1.03952  | 1.154344 | 0.887758 |
| Solute carrier family 41, member 1                              | 1.168227 | 0.927398 | 0.493487 |
| cysteine and histidine-rich domain (CHORD)-containing 1         | 1.083727 | 0.783643 | 0.378026 |
| lipase A, lysosomal acid, cholesterol esterase (Wolman disea    | 1.793903 | 1.572003 | 2.665036 |
| Hypothetical protein LOC772054                                  |          | 0.668391 |          |
| Hypothetical protein LOC776315                                  | 0.632062 | 0.775479 | 0.399288 |
| mitogen-activated protein kinase kinase 1                       | 1.596594 | 1.340869 | 0.214172 |
| H6 family homeobox 1                                            |          |          | 2.084972 |
| ubiquitin-conjugating enzyme E2N (UBC13 homolog, yeast)         | 2.139907 | 1.108842 | 0.405824 |
| solute carrier family 1 (high affinity aspartate/glutamate tran | 1.285212 | 1.235718 | 1.725092 |
| Pleckstrin homology domain containing, family B (evectins)      | 0.360287 | 0.799473 | 0.865338 |
| ADP-ribosylation factor-like 8B                                 | 0.754787 | 0.951447 | 1.098452 |
| Chaperonin containing TCP1, subunit 8 (theta)                   | 0.705797 | 0.654215 | 0.725721 |
| hypothetical protein LOC407087                                  | 0.41859  | 0.86455  | 0.337027 |
| GTP binding protein overexpressed in skeletal muscle            | 3.090469 | 1.383631 | 0.83375  |
| GTP binding protein overexpressed in skeletal muscle            | 2.080132 | 1.262901 | 3.360798 |
| C-type lectin domain family 2, member D                         | 6.457761 |          |          |
| similar to butyrophilin, subfamily 2, member A1 isoform 1 p     | 3.829465 | 1.640773 | 2.231802 |
| SET domain containing (lysine methyltransferase) 8              | 0.929708 | 0.114254 |          |
| Protocadherin 17                                                | 0.366829 |          | 4.578121 |
| acyl-CoA synthetase short-chain family member 3                 |          |          | 0.10461  |
| similar to newborn ovary homeodomain protein                    |          | 0.27733  |          |
| 5'-nucleotidase, cytosolic IB                                   | 2.124669 | 1.739128 | 1.98524  |
| nuclear receptor subfamily 2, group C, member 1                 | 0.924096 | 2.715306 | 0.691864 |
| Similar to alpha 1 type XXIV collagen                           | 0.557758 | 1.790529 | 0.975237 |
| Collagen, type XXIV, alpha 1 /// Similar to alpha 1 type XXI    | 2.564401 | 1.415988 | 0.616665 |
| DnaJ (Hsp40) homolog, subfamily B, member 5                     | 0.334235 | 1.040013 | 0.804601 |
| hect domain and RLD 2                                           |          | 2.499635 |          |
| similar to KIAA2026 protein                                     | 1.680813 | 0.618569 | 0.067827 |

|                                                                                    |          |          |          |
|------------------------------------------------------------------------------------|----------|----------|----------|
| ubiquitin protein ligase E3 component n-recognin 4                                 | 1.432991 | 0.865237 | 0.275659 |
| fucokinase                                                                         | 0.813999 | 1.049896 | 0.767844 |
| LSM5 homolog, U6 small nuclear RNA associated (S. cerevisiae)                      | 0.740826 | 0.860283 | 0.364974 |
| protein kinase C, alpha                                                            | 0.770897 | 1.070655 | 0.409289 |
| HFM1, ATP-dependent DNA helicase homolog (S. cerevisiae)                           | 1.568919 | 0.673701 | 0.600861 |
| Hermansky-Pudlak syndrome 5                                                        | 3.257737 | 1.37113  | 2.02389  |
| Protein phosphatase 1J (PP2C domain containing)                                    | 2.194863 | 1.449668 | 1.539543 |
| cubilin (intrinsic factor-cobalamin receptor)                                      | 0.735531 | 1.409269 | 4.065567 |
| dual-specificity tyrosine-(Y)-phosphorylation regulated kinase                     | 0.478875 | 11.54322 |          |
| FYVE, RhoGEF and PH domain containing 6                                            | 0.340488 | 0.630891 | 0.796735 |
| UDP-N-acetyl-alpha-D-galactosamine:polypeptide N-acetyltransferase                 | 0.608166 | 1.330455 | 0.45139  |
| hect domain and RLD 4                                                              | 1.169585 | 169.3747 | 1.278899 |
| deltex 3-like (Drosophila)                                                         | 3.491229 | 0.951457 | 0.973898 |
| DEAD (Asp-Glu-Ala-Asp) box polypeptide 51                                          |          |          | 0.476927 |
| dpy-19-like 1 (C. elegans)                                                         | 1.062426 | 0.145182 |          |
| ubiquitin specific peptidase 16                                                    | 1.505769 | 0.869898 | 0.49917  |
| pro-melanin-concentrating hormone                                                  | 1.396008 |          |          |
| tectonin beta-propeller repeat containing 1                                        |          |          |          |
| ADAMTS-like 1                                                                      | 0.781019 | 1.053643 | 0.540813 |
| tuftelin 1                                                                         | 1.143051 | 0.588149 |          |
| Actin, beta-like 2                                                                 |          | 0.128779 |          |
| Actin, beta-like 2                                                                 |          | 1.223647 | 2.352701 |
| Transporter 1, ATP-binding cassette, sub-family B (MDR/TAP)                        | 1.954836 | 0.976459 | 3.469525 |
| similar to armadillo repeat containing 2                                           | 1.718227 | 2.00705  | 0.286651 |
| UDP-Gal:betaGlcNAc beta 1,4- galactosyltransferase, polypeptide                    | 0.892122 | 0.896282 | 0.242265 |
| hypothetical gene supported by CR387047                                            | 0.51179  | 0.44431  | 2.442257 |
| jun oncogene                                                                       | 1.578506 | 1.183791 | 1.980235 |
| dolichyl-phosphate mannosyltransferase polypeptide 1, catalytic                    | 0.903954 | 1.002558 | 0.99465  |
| hypothetical gene supported by CR386914                                            | 1.124929 | 1.919849 | 2.502574 |
| 1-acylglycerol-3-phosphate O-acyltransferase 6 (lysophospholipase)                 | 0.710417 | 1.144387 | 0.608012 |
| pleiotrophin                                                                       | 0.721532 | 2.02204  | 1.372548 |
| pleiotrophin                                                                       |          |          |          |
| bromodomain and WD repeat domain containing 2                                      | 5.468165 |          | 2.507758 |
| Karyopherin alpha 3 (importin alpha 4)                                             | 0.921806 | 0.730017 | 0.371073 |
| breast cancer 1, early onset                                                       | 0.865944 | 1.007467 | 0.452007 |
| ATP synthase, H <sup>+</sup> transporting, mitochondrial F1 complex, gamma subunit | 1.005318 | 0.753495 | 1.116467 |
| Glucosamine (N-acetyl)-6-sulfatase (Sanfilippo disease IIID)                       | 1.632387 | 1.282555 | 2.214541 |
| vacuolar protein sorting 13 homolog B (yeast)                                      | 1.143605 | 0.658902 | 0.367294 |
| eukaryotic translation initiation factor 2, subunit 2 beta, 38kDa                  | 1.690732 | 1.022322 | 0.848334 |
| SMAD specific E3 ubiquitin protein ligase 2                                        | 1.413462 | 0.451435 | 0.505191 |

|                                                                             |          |          |          |
|-----------------------------------------------------------------------------|----------|----------|----------|
| coiled-coil domain containing 88A                                           | 1.220616 | 1.076759 | 0.613231 |
| coiled-coil domain containing 88A                                           | 1.217175 | 1.490894 | 0.444469 |
| G protein-coupled receptor 1                                                | 1.251216 | 1.495294 | 3.88877  |
| Similar to nucleophosmin/nucleoplasmin, 2                                   | 19.6195  |          |          |
| KH domain containing, RNA binding, signal transduction associated 2         |          | 14.04181 |          |
| ras responsive element binding protein 1                                    | 1.701412 | 0.878938 | 0.362979 |
| Oxytocin receptor                                                           | 0.48009  |          |          |
| kinesin family member 14                                                    |          | 1.170713 | 0.964058 |
| kinesin family member 14                                                    | 0.665048 | 1.037118 | 0.747741 |
| interleukin 23 receptor                                                     | 1.532561 | 0.509287 | 0.611652 |
| polycomb group ring finger 5                                                | 2.886586 | 1.119747 |          |
| sodium channel and clathrin linker 1                                        | 2.564267 | 1.227488 |          |
| N-acetylated alpha-linked acidic dipeptidase-like 2                         | 0.839128 | 1.753275 | 1.479247 |
| family with sequence similarity 123B                                        |          | 8.768123 | 21.39697 |
| Tetratricopeptide repeat, ankyrin repeat and coiled-coil containing 2       |          |          | 0.132041 |
| Tetratricopeptide repeat, ankyrin repeat and coiled-coil containing 2       | 0.690702 | 1.182663 | 1.45915  |
| leucine rich repeat containing 48                                           | 0.370937 | 1.158423 | 0.169817 |
| Abhydrolase domain containing 7                                             | 0.773432 | 1.004211 | 0.418176 |
| Abhydrolase domain containing 7                                             | 0.424888 | 0.602633 | 0.051162 |
| chromosome 21 open reading frame 70                                         | 1.081082 | 1.048459 | 0.741231 |
| Alanine-glyoxylate aminotransferase 2-like 1                                | 0.623219 | 0.675048 | 0.259814 |
| glutaredoxin 3                                                              | 1.090504 | 1.146668 | 0.690497 |
| KIAA1109                                                                    |          | 2.549077 |          |
| Glycerophosphodiester phosphodiesterase 1                                   | 0.819358 | 0.941329 | 0.453231 |
| peroxidase homolog (Drosophila)                                             | 2.205363 | 1.232805 | 0.050704 |
| fms-related tyrosine kinase 1 (vascular endothelial growth factor receptor) | 2.77068  | 1.190479 | 1.649728 |
| zinc finger protein 509                                                     | 2.23656  | 0.997295 | 0.317293 |
| KIAA1333                                                                    | 1.11345  | 0.861558 | 0.42287  |
| Acid phosphatase-like 2                                                     | 2.748384 | 1.297578 | 0.587148 |
| Tuftelin 1                                                                  | 0.890557 | 1.075933 | 1.741183 |
| interleukin 6 (interferon, beta 2)                                          | 2.642528 |          |          |
| Signaling lymphocytic activation molecule family member 1                   | 1.344296 | 0.823403 | 0.40792  |
| Similar to bactericidal permeability-increasing protein                     | 1.132261 |          | 10.91105 |
| LIM and senescent cell antigen-like domains 1 /// hypothetical              | 0.659844 | 2.180943 | 1.123489 |
| MAS-related GPR, member H                                                   | 3.064102 | 1.243178 | 5.518506 |
| ISL LIM homeobox 1                                                          | 1.203381 | 0.907499 | 1.946576 |
| ISL LIM homeobox 1                                                          | 0.875215 | 0.958787 | 1.09959  |
| KIAA1109                                                                    | 0.40353  |          |          |
| hypothetical gene supported by CR385901                                     |          |          | 0.468239 |
| Solute carrier family 23 (nucleobase transporters), member 3                |          | 0.432664 |          |

|                                                                                 |          |          |          |
|---------------------------------------------------------------------------------|----------|----------|----------|
| teashirt family zinc finger 2                                                   | 0.976184 | 0.783813 | 2.313563 |
| phosphoserine aminotransferase 1                                                | 1.2772   | 0.606029 | 0.786783 |
| spectrin repeat containing, nuclear envelope 2                                  | 1.155956 | 0.853273 | 1.278112 |
| MYST histone acetyltransferase (monocytic leukemia) 3                           | 0.550611 | 0.632759 | 1.527525 |
| family with sequence similarity 38, member B                                    | 1.291982 | 1.591462 | 2.105157 |
| Hypothetical protein LOC769469                                                  | 1.558274 | 1.131413 | 5.434678 |
| similar to hypothetical protein                                                 | 0.743418 |          |          |
| prostaglandin-D synthase                                                        | 1.171568 | 1.1269   | 1.327021 |
| titin                                                                           |          |          |          |
| Myosin VI                                                                       |          | 2.550199 |          |
| chromosome 7 open reading frame 46                                              | 0.526361 | 1.259284 | 0.163599 |
| Contactin 4                                                                     | 2.433532 | 1.868787 | 0.787147 |
| Protein phosphatase 1, regulatory (inhibitor) subunit 10                        | 1.867185 |          |          |
| Transcription factor 25 (basic helix-loop-helix)                                | 0.94437  | 0.868352 | 2.078953 |
| mitofusin 2                                                                     | 1.108513 | 2.554567 | 0.070135 |
| chromosome 17 open reading frame 85                                             | 1.111707 | 0.937538 | 0.810457 |
| Chromosome 16 open reading frame 14                                             | 0.20095  | 0.831841 | 3.417528 |
| Chromosome 21 open reading frame 70                                             | 0.551242 | 1.054524 | 3.097688 |
| intraflagellar transport 88 homolog (Chlamydomonas)                             | 0.647312 | 0.89056  | 0.584087 |
| PHD finger protein 15                                                           | 0.799373 | 0.770781 | 0.194191 |
| jumonji domain containing 1C                                                    | 2.32071  | 1.158278 | 0.536784 |
| T-complex 11 (mouse)-like 1                                                     | 1.543442 | 0.84108  | 1.190803 |
| Solute carrier family 6 (neurotransmitter transporter, taurine)                 | 3.393465 | 1.224126 | 0.790594 |
| polycystic kidney and hepatic disease 1 (autosomal recessive)                   | 2.137149 |          |          |
| methyltransferase like 7A                                                       | 1.12793  | 1.684714 | 4.18028  |
| V-myc myelocytomatosis viral related oncogene, neuroblast                       | 0.886188 | 0.937609 | 0.273417 |
| ELKS/RAB6-interacting/CAST family member 1                                      | 1.362729 | 0.260872 | 0.432577 |
| palladin, cytoskeletal associated protein                                       |          |          |          |
| ST6 (alpha-N-acetyl-neuraminyl-2,3-beta-galactosyl-1,3)-N-acetylgalactosaminide |          |          | 0.450195 |
| ubiquitin associated protein 2                                                  | 6.395588 | 1.521185 | 0.689363 |
| splicing factor, arginine/serine-rich 4                                         |          | 0.165972 | 1.955665 |
| family with sequence similarity 134, member C                                   | 0.379267 | 1.531828 | 0.061942 |
| family with sequence similarity 134, member C                                   | 1.246092 | 0.899    | 0.38424  |
| StAR-related lipid transfer (START) domain containing 4                         | 0.202988 | 0.54664  | 1.062324 |
| RAP2C, member of RAS oncogene family                                            | 0.869632 | 1.760451 | 0.648471 |
| Ribosomal protein SA                                                            | 1.768913 | 0.513179 | 2.218013 |
| guanine nucleotide binding protein (G protein), gamma 11                        | 0.888293 | 2.351505 | 2.156968 |
| microtubule-associated protein tau                                              | 0.698028 | 0.864238 | 2.389835 |
| spastic paraplegia 3A (autosomal dominant)                                      |          |          | 0.111961 |
| Rac GTPase activating protein 1                                                 | 0.79272  | 1.139375 | 0.485293 |

|                                                              |          |          |          |
|--------------------------------------------------------------|----------|----------|----------|
| Collagen, type IV, alpha 3 (Goodpasture antigen) binding pr  | 0.172106 |          |          |
| Chromosome 14 open reading frame 121                         | 1.216294 | 1.1158   | 1.967089 |
| hypothetical LOC425659                                       | 0.477536 | 1.309358 | 0.738845 |
| transmembrane protein 175                                    | 0.681338 | 0.962171 | 2.642578 |
| Non-SMC condensin II complex, subunit H2                     | 0.353152 | 1.397476 | 0.558247 |
| centrosomal protein 55kDa                                    | 1.163593 | 0.809616 | 0.424202 |
| UDP-glucose ceramide glucosyltransferase                     | 0.792938 | 1.095929 | 2.702426 |
| vacuolar protein sorting 54 homolog (S. cerevisiae)          | 0.964736 | 0.79067  | 0.727333 |
| adaptor-related protein complex 2, mu 1 subunit              | 0.611611 | 1.210542 | 0.384645 |
| hypothetical protein LOC768772                               | 1.179599 | 1.215711 | 2.015903 |
| solute carrier family 24 (sodium/potassium/calcium exchang   | 1.590332 | 0.867799 | 3.738529 |
| Enah/Vasp-like                                               | 0.769331 | 1.091886 | 0.115893 |
| Fas apoptotic inhibitory molecule 2                          | 0.396253 |          |          |
| signal-induced proliferation-associated 1 like 2             | 2.815393 | 2.735905 | 4.466204 |
| WD repeats and SOF1 domain containing                        | 1.323567 | 2.343607 | 0.706621 |
| hypothetical LOC420734                                       | 1.146543 |          |          |
| kinesin family member 27                                     | 2.443153 |          |          |
| paired related homeobox 1                                    | 1.923623 | 1.817585 | 3.767112 |
| Paired related homeobox 1                                    | 2.87429  | 1.462008 | 6.449259 |
| DPH3, KTI11 homolog (S. cerevisiae)                          | 1.03027  | 0.670269 | 0.461013 |
| hypothetical LOC416390                                       |          |          |          |
| lectin, galactoside-binding, soluble, 3                      | 1.842208 | 1.263343 | 4.835852 |
| baculoviral IAP repeat-containing 5 (survivin)               | 0.492669 | 1.409104 | 0.401077 |
| t-complex 11 homolog (mouse)                                 |          | 0.195151 | 4.847409 |
| kelch-like 10 (Drosophila)                                   | 1.774668 | 1.825995 | 1.515244 |
| similar to hypothetical protein MGC33370                     | 1.468382 | 0.698758 | 2.250039 |
| transmembrane protease, serine 2                             | 2.65343  | 1.945855 | 2.756421 |
| forkhead box N4                                              | 0.339367 |          |          |
| solute carrier family 24 (sodium/potassium/calcium exchang   | 2.089893 | 1.589893 | 1.46815  |
| similar to NAD(P) dependent steroid dehydrogenase-like       | 3.7629   | 0.757685 | 0.507824 |
| hypothetical LOC426161                                       |          | 0.058169 |          |
| Hypothetical LOC426985                                       | 0.834875 | 0.225227 |          |
| hypothetical protein LOC772356                               | 4.102151 | 1.233356 | 2.074012 |
| apoptosis inhibitor 5 /// pyruvate dehydrogenase complex, cc | 2.204434 | 1.288967 | 0.681147 |
| runt-related transcription factor 2                          | 1.695834 | 3.402427 | 17.47121 |
| Basic helix-loop-helix domain containing, class B, 2         | 2.577177 | 1.48248  | 6.380785 |
| nuclear receptor subfamily 2, group C, member 2              |          | 0.802784 | 2.143646 |
| nuclear receptor subfamily 2, group C, member 2              | 1.001845 | 0.762079 | 0.559439 |
| nuclear receptor subfamily 2, group C, member 2              | 1.659772 | 0.882073 | 0.399824 |
| transmembrane protein 184B                                   | 0.797995 | 0.792995 | 2.129272 |

|                                                                      |          |          |          |
|----------------------------------------------------------------------|----------|----------|----------|
| Serine/threonine kinase 24 (STE20 homolog, yeast)                    | 0.812976 | 0.962302 | 1.944381 |
| THAP domain containing 7                                             | 1.23222  | 0.869345 | 1.119424 |
| RCSD domain containing 1                                             | 3.896322 | 1.550408 | 0.914042 |
| 4-hydroxyphenylpyruvate dioxygenase                                  | 0.891122 |          | 5.07013  |
| sorting nexin 3                                                      | 0.830399 | 1.019267 | 0.389943 |
| polyribonucleotide nucleotidyltransferase 1                          | 0.324265 |          | 0.89907  |
| jumonji domain containing 1C                                         | 1.41415  | 0.662706 | 0.481674 |
| adenosylmethionine decarboxylase 1                                   | 0.909804 | 0.885146 | 2.157773 |
| hypothetical gene supported by CR385274                              | 0.663498 | 0.88319  | 0.331548 |
| kinesin family member 24                                             | 0.442717 | 1.213295 | 23.06225 |
| chromosome 6 open reading frame 186                                  | 7.209417 | 8.15834  | 0.057341 |
| LysM, putative peptidoglycan-binding, domain containing 2            | 0.890369 | 0.842563 | 0.381298 |
| ubiquitin-conjugating enzyme E2 variant 2                            | 1.068909 | 0.870592 | 0.393408 |
| interferon regulatory factor 10                                      | 2.340875 | 1.078732 | 4.06463  |
| denticleless homolog (Drosophila)                                    |          |          | 0.048039 |
| thioredoxin domain containing 16                                     | 1.460827 | 1.599772 | 3.136327 |
| fms-related tyrosine kinase 4                                        | 2.185971 | 2.318331 | 3.68605  |
| cytokine-like nuclear factor n-pac                                   | 0.530231 | 0.98153  | 0.394865 |
| cytokine-like nuclear factor n-pac                                   | 0.737357 | 1.35587  | 0.460642 |
| TRAF interacting protein                                             | 0.384405 | 1.121656 | 2.669114 |
| LIM and SH3 protein 1                                                | 0.761108 | 0.932408 | 2.090533 |
| Zinc finger protein 318                                              | 0.860659 | 0.811911 | 0.272461 |
| ring finger protein 149                                              | 0.942803 | 2.184556 | 1.014812 |
| centrosomal protein 63kDa                                            | 1.005402 | 0.409179 |          |
| similar to USP6NL protein                                            | 1.668644 | 1.098212 | 0.771438 |
| chromosome 6 open reading frame 98                                   | 10.99415 |          |          |
| essential meiotic endonuclease 1 homolog 1 (S. pombe)                | 0.618674 | 1.531635 | 0.256154 |
| stathmin-like 2                                                      | 0.751417 | 1.701439 | 3.881511 |
| coiled-coil domain containing 117 /// hypothetical protein LOC769136 |          | 0.032203 |          |
| Hypothetical LOC416916                                               |          |          | 0.346126 |
| transmembrane protein 37                                             | 0.422117 | 1.040409 | 1.44111  |
| leucine zipper-EF-hand containing transmembrane protein 2            | 1.23067  | 0.040264 |          |
| Zinc finger, DHHC-type containing 14                                 | 1.109953 | 0.731142 | 0.586982 |
| zinc finger protein 106 homolog (mouse)                              | 2.194409 | 0.941494 | 1.28151  |
| spastic ataxia of Charlevoix-Saguenay (sacsin)                       | 1.142943 | 0.652708 | 0.520604 |
| high-mobility group 20A                                              |          |          | 0.466499 |
| midline 1                                                            | 2.477146 | 1.313127 | 1.861037 |
| HIV-1 Tat specific factor 1                                          | 1.142336 |          | 0.633961 |
| activating signal cointegrator 1 complex subunit 3-like 1            | 0.933343 | 0.887352 | 0.498027 |
| PDZ domain containing RING finger 3                                  | 2.001145 | 1.015492 | 1.505089 |



|                                                                                              |          |          |          |
|----------------------------------------------------------------------------------------------|----------|----------|----------|
| TBCC domain containing 1                                                                     | 1.345165 | 0.621095 |          |
| protein phosphatase 1, regulatory (inhibitor) subunit 14C                                    | 0.87826  | 0.801656 | 0.273163 |
| Hypothetical LOC428586                                                                       | 1.21226  | 1.048614 | 1.574116 |
| nucleoporin 153kDa                                                                           | 1.896769 |          | 0.643628 |
| family with sequence similarity 46, member D                                                 | 3.1395   | 0.038358 | 1.125903 |
| POZ (BTB) and AT hook containing zinc finger 1                                               | 2.484058 | 1.1316   | 0.695147 |
| GRB2-associated binding protein 1                                                            | 2.751234 | 1.588709 | 1.336409 |
| Similar to Chromosome 1 open reading frame 33                                                | 0.578998 |          | 2.614433 |
| KIAA0664                                                                                     | 0.586137 | 0.938157 | 1.436957 |
| centrosomal protein 76kDa /// similar to Centrosomal protein                                 | 2.164902 | 0.745928 | 0.769964 |
| dihydroxyacetone kinase 2 homolog (S. cerevisiae)                                            | 0.94918  | 0.730184 | 3.276705 |
| nicotinamide phosphoribosyltransferase                                                       | 3.853836 | 1.001201 | 2.470277 |
| mannosidase, beta A, lysosomal                                                               | 0.772271 | 1.655637 | 1.430467 |
| frataxin                                                                                     | 0.710163 | 0.957807 | 2.288807 |
| poly (ADP-ribose) polymerase family, member 6                                                | 1.251601 | 0.76915  | 2.31324  |
| Similar to KIAA1217 protein                                                                  | 2.089722 | 1.186436 | 2.562873 |
| hypothetical LOC431243 /// similar to APH1A protein                                          | 0.803332 |          | 0.375881 |
| collectin sub-family member 12                                                               | 2.143329 | 1.508072 | 3.672692 |
| ghrelin/obestatin prohormone                                                                 | 1.483341 | 1.052456 | 1.089267 |
| follicle stimulating hormone, beta polypeptide                                               |          | 0.063073 |          |
| ecto-NOX disulfide-thiol exchanger 1                                                         | 0.573199 | 0.359987 |          |
| tyrosyl-DNA phosphodiesterase 1                                                              | 0.847339 | 1.213943 | 0.607503 |
| family with sequence similarity 76, member A                                                 | 0.863951 | 0.808038 | 0.154352 |
| Hypothetical LOC425209                                                                       | 0.897216 | 1.105307 | 2.131212 |
| procollagen-proline, 2-oxoglutarate 4-dioxygenase (proline 4-hydroxylase), alpha polypeptide |          |          |          |
| chromosome 3 open reading frame 14                                                           | 2.068067 | 1.696893 | 0.870449 |
| Transmembrane protein 220                                                                    | 0.774963 | 0.662698 | 0.393429 |
| YTH domain containing 1                                                                      | 1.13879  | 0.721364 | 0.498654 |
| chondroadherin                                                                               | 2.407173 | 0.446128 | 1.071198 |
| uveal autoantigen with coiled-coil domains and ankyrin repeat                                | 1.667864 | 1.18239  | 0.4477   |
| adiponectin, C1Q and collagen domain containing                                              | 1.49253  | 1.729474 | 2.95101  |
| triple functional domain (PTPRF interacting)                                                 | 0.103822 | 1.378802 |          |
| chromosome 5 open reading frame 24                                                           | 1.108591 | 0.902662 | 0.469583 |
| similar to hypothetical protein                                                              |          |          | 2.720952 |
| R-spondin 3 homolog (Xenopus laevis)                                                         |          |          | 5.352421 |
| DnaJ (Hsp40) homolog, subfamily C, member 3                                                  | 1.062144 | 0.94582  | 0.671011 |
| REST corepressor 3                                                                           | 0.707743 | 0.761585 | 0.459634 |
| E2F transcription factor 8                                                                   | 0.808603 | 0.84435  | 0.279972 |
| ankyrin repeat and BTB (POZ) domain containing 1                                             | 0.89737  | 2.671686 | 0.739871 |
| Solute carrier family 1 (glutamate/neutral amino acid transporter)                           | 0.430575 | 1.183984 | 0.751897 |

|                                                                      |          |          |          |
|----------------------------------------------------------------------|----------|----------|----------|
| CD55 molecule, decay accelerating factor for complement (Cromer bloc | 4.920405 |          |          |
| ferredoxin reductase                                                 | 0.783286 | 1.361713 | 2.277745 |
| hypothetical protein LOC769756                                       | 2.188992 |          |          |
| excision repair cross-complementing rodent repair deficiency         | 1.265104 | 0.760936 | 1.358616 |
| hypothetical LOC427191                                               | 0.568778 | 1.182174 | 2.90908  |
| BTB (POZ) domain containing 12                                       | 1.172019 | 1.020824 | 0.514101 |
| apolipoprotein H (beta-2-glycoprotein I)                             | 0.854253 |          |          |
| SRY (sex determining region Y)-box 5                                 | 0.774721 | 0.774013 | 3.090755 |
| Similar to importin beta subunit                                     | 0.853605 | 0.639084 | 1.425573 |
| chromosome 3 open reading frame 59                                   | 0.369254 | 0.987925 | 3.495354 |
| VMA21 vacuolar H <sup>+</sup> -ATPase homolog (S. cerevisiae)        | 0.732414 | 0.781256 | 0.266976 |
| G protein-coupled receptor 153                                       | 0.779833 | 0.631576 | 0.22369  |
| Ceruloplasmin (ferroxidase)                                          | 1.102557 | 0.426105 | 2.409398 |
| RAD51 homolog (RecA homolog, E. coli) (S. cerevisiae)                | 0.409033 | 1.115144 | 0.907793 |
| Ca <sup>2+</sup> -dependent secretion activator                      | 3.127783 | 1.423167 |          |
| hypothetical gene supported by CR385186                              | 0.648124 | 1.156281 | 0.706076 |
| STT3, subunit of the oligosaccharyltransferase complex, hon          | 1.168174 | 0.916689 | 0.504402 |
| PITPNM family member 3                                               | 1.808393 | 1.634342 | 6.559222 |
| ankyrin repeat and MYND domain containing 1                          | 1.109189 | 0.901367 | 1.400741 |
| transmembrane and tetratricopeptide repeat containing 1              | 1.711484 | 1.127162 | 2.122607 |
| RAB14, member RAS oncogene family                                    | 1.481897 | 0.899637 | 0.319794 |
| KIAA1310                                                             | 0.807996 | 1.210071 | 2.988101 |
| KIAA1310                                                             | 0.478412 | 1.410112 | 3.177434 |
| transmembrane and coiled-coil domains 7                              | 1.451599 | 1.340704 | 2.989071 |
| Protein tyrosine phosphatase, receptor type, K                       | 0.848512 | 1.08522  | 0.468436 |
| keratin 14                                                           | 0.696736 | 0.841745 | 0.278914 |
| Fucosidase, alpha-L- 1, tissue                                       | 0.858564 | 0.955621 | 0.900674 |
| Similar to mKIAA1930 protein                                         | 0.971802 | 0.746783 | 0.397814 |
| protein phosphatase 2 (formerly 2A), regulatory subunit B", ;        | 1.279302 | 0.544237 | 0.380645 |
| Ring finger protein 19B                                              | 4.012212 | 1.42892  | 4.64298  |
| Mannosidase, endo-alpha                                              | 0.74504  | 2.145941 | 1.166532 |
| family with sequence similarity 81, member A                         |          |          | 2.233691 |
| PDGFA associated protein 1                                           |          | 1.578398 | 0.056078 |
| N-6 adenine-specific DNA methyltransferase 2 (putative)              | 0.633513 | 2.428591 | 2.001422 |
| potassium channel tetramerisation domain containing 3                | 1.340757 | 0.859561 | 2.624281 |
| myosin IXA                                                           | 1.327151 | 0.926307 | 2.174635 |
| cytoplasmic polyadenylation element binding protein 2                | 0.834152 | 0.956168 | 2.072549 |
| short coiled-coil protein                                            | 1.184626 | 0.967496 | 0.46472  |
| hypothetical LOC418218                                               |          |          | 2.509034 |
| regulator of chromosome condensation (RCC1) and BTB (Pc              | 0.841809 | 0.859249 | 0.345663 |

|                                                                       |          |          |          |
|-----------------------------------------------------------------------|----------|----------|----------|
| cortactin                                                             | 1.096025 | 1.040047 | 2.201152 |
| similar to class I alpha chain                                        | 0.912703 | 0.570258 | 4.313083 |
| similar to MHC Rfp-Y class I alpha chain /// similar to MHC           | 0.955128 | 0.489267 | 3.691034 |
| Chromosome 6 open reading frame 62                                    | 1.23232  | 3.762167 | 0.895924 |
| Vacuolar protein sorting 8 homolog (S. cerevisiae)                    | 0.66878  | 1.129645 | 2.090257 |
| similar to dysferlin                                                  |          |          | 0.40527  |
| PHD finger protein 14                                                 | 0.794903 | 1.356948 | 0.224688 |
| similar to KIAA2026 protein                                           | 1.338472 | 0.753689 | 0.514512 |
| hypothetical gene supported by CR387037                               | 0.810177 | 0.498584 | 0.434642 |
| Sec61 alpha 2 subunit (S. cerevisiae)                                 | 1.361082 | 0.402151 | 0.773021 |
| Sec61 alpha 2 subunit (S. cerevisiae)                                 | 1.997286 | 1.218461 | 0.400108 |
| 1-acylglycerol-3-phosphate O-acyltransferase 3 /// similar to         | 1.350587 | 1.24459  | 2.700016 |
| SECIS binding protein 2                                               | 0.35441  | 11.68548 | 1.585608 |
| mitogen-activated protein kinase 10                                   | 0.722449 | 1.081641 |          |
| hypothetical gene supported by CR386657                               | 0.7251   | 0.86631  | 0.251029 |
| serine/threonine kinase 10                                            | 0.849109 | 1.735611 | 2.58678  |
| Myotubularin related protein 9                                        | 1.201817 | 0.863164 | 2.07149  |
| DIP2 disco-interacting protein 2 homolog B (Drosophila)               | 0.618071 | 1.726436 | 0.138036 |
| KIAA1913                                                              | 0.824504 | 0.685124 | 0.356707 |
| WD repeat and FYVE domain containing 1                                | 1.366306 | 0.924497 | 0.348543 |
| hypothetical LOC420382                                                |          |          | 2.234357 |
| hypothetical LOC426128                                                | 0.942196 | 1.653375 | 0.330959 |
| abhydrolase domain containing 13                                      | 1.096626 | 0.940241 | 0.401505 |
| DENN/MADD domain containing 4C                                        | 0.338924 | 1.247111 |          |
| cell division cycle 2-like 2 (PITSLRE proteins)                       | 1.011373 | 0.55501  | 0.392457 |
| similar to putative 40-2-3 protein                                    | 1.029203 | 0.961584 | 1.970601 |
| similar to hypothetical protein FLJ39743                              | 1.005506 | 0.712343 | 0.698038 |
| translocation protein 1                                               | 1.173969 | 0.332887 | 0.527711 |
| Similar to choline transporter-like protein 1, splice                 | 0.409077 | 1.910312 | 1.308361 |
| ATG4 autophagy related 4 homolog B (S. cerevisiae)                    | 0.373727 | 1.783472 | 0.97275  |
| ATG4 autophagy related 4 homolog B (S. cerevisiae)                    | 0.692723 | 0.587933 | 0.464803 |
| Notch homolog 1, translocation-associated (Drosophila)                | 0.971722 | 0.947791 | 0.749876 |
| protein phosphatase 6, catalytic subunit                              | 0.830632 | 1.076346 | 1.44572  |
| spire homolog 1 (Drosophila)                                          | 1.926435 | 2.755335 | 5.331232 |
| amidohydrolase domain containing 2                                    | 1.00461  | 1.225778 | 2.725736 |
| KIAA1109                                                              | 1.216332 | 0.89056  | 0.725294 |
| transmembrane protein 220                                             | 0.542549 | 0.614136 | 0.428037 |
| STT3, subunit of the oligosaccharyltransferase complex, homolog A (S. | 1.343863 |          | 0.021931 |
| ankyrin repeat and SOCS box-containing 5                              | 0.29341  | 1.108025 | 0.854994 |
| KIAA0368                                                              |          |          | 2.513332 |

|                                                                       |          |          |          |
|-----------------------------------------------------------------------|----------|----------|----------|
| complement C4 /// steroid 21-hydroxylase                              | 0.864399 | 1.23451  | 1.338914 |
| nuclear receptor subfamily 2, group C, member 2                       | 0.683318 | 1.979926 | 0.49833  |
| membrane bound O-acyltransferase domain containing 1                  | 1.271072 | 1.559802 | 2.127716 |
| ubiquitin specific peptidase 24                                       | 1.378598 | 2.315481 | 1.197842 |
| Nedd4 binding protein 1                                               |          |          |          |
| Chromosome 10 open reading frame 72                                   | 1.379322 | 1.171781 | 2.686904 |
| interferon regulatory factor 2 binding protein 2                      | 1.083361 | 1.20316  | 2.166288 |
| ubiquitin specific peptidase 14 (tRNA-guanine transglycosyl           | 0.85799  | 1.018968 | 2.739966 |
| Tripartite motif-containing 35                                        | 0.82011  | 1.06921  | 4.036332 |
| hypothetical LOC423474                                                | 1.618591 | 1.683534 | 1.337948 |
| SPARC related modular calcium binding 1                               |          | 1.278308 | 0.17395  |
| Similar to Bardet-Biedl syndrome 7                                    | 1.097897 | 0.976027 | 0.165863 |
| PR domain containing 11                                               | 1.096351 | 1.863735 | 3.622881 |
| pyruvate dehydrogenase kinase, isozyme 4                              | 0.790822 | 2.155557 | 4.998191 |
| hypothetical protein LOC769733                                        | 0.942985 | 0.908188 | 0.45796  |
| Na <sup>+</sup> /H <sup>+</sup> exchanger domain containing 2         | 0.892287 | 2.398379 | 4.698542 |
| UBX domain protein 2B                                                 | 1.18284  | 0.873132 | 0.480423 |
| interferon induced with helicase C domain 1                           | 2.37039  | 1.358636 | 2.653053 |
| spermatogenesis associated 17                                         |          | 3.47133  |          |
| RNA binding motif protein 7                                           | 0.718973 | 1.057546 | 0.478634 |
| dynein, light chain, Tctex-type 3                                     | 0.861538 | 1.43216  | 2.067637 |
| CDGSH iron sulfur domain 2                                            | 1.623408 | 1.106466 | 2.796847 |
| RAS p21 protein activator 3                                           | 2.002371 | 0.926609 | 0.498224 |
| chromosome 5 open reading frame 30                                    | 0.677403 | 1.001478 | 0.725379 |
| similar to 2C4D /// MOB1, Mps One Binder kinase activator-like 3 (yea |          | 0.06059  | 0.195646 |
| Hypothetical protein LOC768787                                        | 1.325832 | 1.59863  | 6.665435 |
| Hypothetical protein LOC768787                                        | 1.93968  | 3.060607 | 1.136212 |
| hypothetical gene supported by CR386744                               | 0.525538 | 0.884328 | 0.304915 |
| SRY (sex determining region Y)-box 1                                  | 0.103406 |          | 1.362076 |
| similar to ARPP-21 protein                                            | 0.680577 | 0.971613 | 0.238909 |
| deoxyribonuclease II beta                                             |          | 2.484549 |          |
| family with sequence similarity 65, member A                          | 0.880187 | 0.884999 | 2.633047 |
| sphingomyelin phosphodiesterase 3, neutral membrane (neut             | 0.702034 | 1.247197 | 0.208838 |
| WD repeat domain 44                                                   | 1.191501 | 0.841319 | 0.351554 |
| ATPase, Ca <sup>++</sup> transporting, ubiquitous                     | 2.534743 | 0.795312 | 0.327546 |
| metaxin 3                                                             | 0.420815 | 0.665767 |          |
| drebrin-like                                                          | 0.669264 | 0.969086 | 1.877201 |
| Melanoma inhibitory activity family, member 3                         |          | 0.070415 |          |
| Melanoma inhibitory activity family, member 3                         | 1.522061 | 0.655381 | 0.464563 |
| hypothetical gene supported by CR386144                               | 1.056809 | 0.943879 | 0.942257 |

|                                                             |          |          |          |
|-------------------------------------------------------------|----------|----------|----------|
| hypothetical gene supported by CR387685                     | 2.076503 | 1.119499 | 1.14638  |
| hypothetical gene supported by CR387685                     | 2.651317 | 1.3609   | 1.073681 |
| CD81 molecule                                               | 1.018783 | 1.326086 | 2.090125 |
| lysosomal associated protein transmembrane 4 beta           | 0.941451 | 1.822479 | 0.473834 |
| spermatogenesis associated 18 homolog (rat)                 |          | 2.945248 | 0.44418  |
| succinate-CoA ligase, GDP-forming, alpha subunit            | 0.962926 | 0.498276 | 1.053172 |
| myeloid cell leukemia sequence 1 (BCL2-related)             | 1.098719 | 1.162589 | 0.527311 |
| Alpha thalassemia/mental retardation syndrome X-linked      | 1.207143 | 1.003245 | 0.681504 |
| similar to KIAA1271 protein                                 | 1.205317 | 1.221681 | 0.856281 |
| hephaestin                                                  | 1.491912 | 1.290992 | 4.116605 |
| GRAM domain containing 3                                    | 0.680992 | 0.933961 | 2.102744 |
| cullin 1                                                    | 1.643087 | 0.776    | 0.351632 |
| chromosome 15 open reading frame 41                         | 1.462284 | 0.815449 | 0.442952 |
| bile acid Coenzyme A: amino acid N-acyltransferase (glycin  | 1.627351 |          | 2.250511 |
| phosphotyrosine interaction domain containing 1             | 0.812955 | 1.50842  | 1.854076 |
| T-cell lymphoma breakpoint associated target 1              | 0.111409 |          |          |
| T-cell lymphoma breakpoint associated target 1              | 0.111409 |          |          |
| ADP-ribosylation factor-like 4C                             | 1.117633 | 1.293177 | 2.185362 |
| Engulfment and cell motility 1                              |          | 0.233022 |          |
| outer dense fiber of sperm tails 1                          |          |          |          |
| similar to FLJ46082 protein                                 |          |          |          |
| bromodomain containing 8                                    | 1.149703 | 0.495896 | 0.688461 |
| tubulin polymerization-promoting protein family member 2    | 0.699891 |          | 0.335551 |
| lipoma HMGIC fusion partner                                 | 1.800722 | 1.031491 | 1.415825 |
| leucine rich repeat containing 67                           |          |          | 3.146885 |
| hypothetical LOC419830                                      | 1.89982  | 0.655438 | 1.21974  |
| sperm associated antigen 4                                  | 0.312368 |          |          |
| Cytochrome b5 domain containing 2                           | 0.960044 | 1.311616 | 1.812942 |
| hypothetical gene supported by CR387546                     | 0.586098 | 1.000894 | 0.29796  |
| hypothetical gene supported by CR386965 /// hypothetical pi | 1.041976 | 0.85374  | 0.640378 |
| PHD finger protein 5A                                       |          | 0.095795 |          |
| PHD finger protein 5A                                       | 0.608884 |          |          |
| PHD finger protein 5A                                       | 0.646966 | 0.974428 | 0.414319 |
| Complement C4                                               | 0.507561 | 1.337139 | 2.014253 |
| complement C4                                               | 0.834649 | 1.095138 | 2.984961 |
| endonuclease/exonuclease/phosphatase family domain conta    | 1.03633  | 2.396173 | 3.376522 |
| deoxycytidine kinase                                        | 0.715907 | 1.006613 | 0.334637 |
| similar to myosin IIIA; deafness, autosomal recessive 30    | 1.204242 | 0.936192 | 3.222477 |
| DENN/MADD domain containing 5B                              | 1.196118 | 0.765302 | 0.493394 |
| Membrane associated guanylate kinase, WW and PDZ doma       | 2.238816 | 1.016158 | 6.669768 |

|                                                                       |          |          |          |
|-----------------------------------------------------------------------|----------|----------|----------|
| farnesyltransferase, CAAX box, alpha                                  | 0.730275 | 0.903199 | 0.867183 |
| parvin, beta                                                          | 0.445384 |          |          |
| claudin domain containing 1                                           | 1.213567 | 0.770018 | 0.175364 |
| protein tyrosine phosphatase, non-receptor type 5 (striatum-enriched) |          | 0.953382 | 2.039405 |
| nucleolar protein 11                                                  | 1.781365 | 0.86054  | 0.43507  |
| ecotropic viral integration site 5                                    | 1.630799 | 0.590529 | 1.170329 |
| Similar to Vasohibin                                                  | 0.915519 | 0.954018 | 0.349473 |
| SLIT-ROBO Rho GTPase activating protein 1                             | 2.1022   | 0.886101 | 1.795242 |
| similar to dysferlin                                                  | 1.364585 | 0.934573 | 2.252202 |
| Neuro-oncological ventral antigen 1                                   | 2.759865 | 1.148203 | 1.169158 |
| glycine C-acetyltransferase (2-amino-3-ketobutyrate coenzym           | 0.265569 | 0.875345 | 0.450591 |
| multiple EGF-like-domains 9                                           | 2.227948 |          |          |
| tumor suppressor candidate 2                                          | 1.007602 | 1.252528 | 2.610312 |
| TAR DNA binding protein                                               | 1.042248 | 0.820803 | 0.626618 |
| hypothetical gene supported by CR387102                               |          |          | 0.454127 |
| similar to Atp5c1-prov protein /// TAF3 RNA polymerase II,            | 0.838963 | 0.666669 | 0.381966 |
| Kruppel-like factor 6                                                 | 1.008987 | 1.01311  | 1.878118 |
| Hypothetical protein LOC769351                                        | 0.88884  |          | 0.157971 |
| E74-like factor 1 (ets domain transcription factor)                   | 0.993389 | 0.648627 | 0.438864 |
| KIAA0082                                                              | 2.615685 | 1.243825 | 1.928474 |
| PDS5, regulator of cohesion maintenance, homolog A (S. ce             | 0.397016 | 1.370606 | 0.363902 |
| nuclear receptor coactivator 7                                        | 0.459784 | 2.086202 | 0.251498 |
| fibroblast growth factor receptor 2                                   | 0.750616 |          | 3.33722  |
| Homer homolog 3 (Drosophila)                                          | 1.685686 | 0.813066 | 2.110309 |
| Homer homolog 3 (Drosophila)                                          | 0.8029   | 1.266424 | 2.510093 |
| cAMP responsive element binding protein 3-like 2                      | 0.772037 | 0.811554 | 0.422813 |
| cAMP responsive element binding protein 3-like 2                      | 0.369027 | 1.118074 | 0.40374  |
| hypothetical gene supported by CR387752                               | 0.835326 | 1.61116  | 2.017327 |
| Similar to Parp3 protein                                              | 1.07063  | 1.675963 | 4.090956 |
| Mannan-binding lectin serine peptidase 2                              | 0.600174 |          |          |
| Cadherin 8, type 2                                                    |          | 2.027176 |          |
| Nipped-B homolog (Drosophila)                                         | 0.922656 | 1.098686 | 0.477324 |
| signal peptidase complex subunit 2 homolog (S. cerevisiae)            | 0.806588 | 0.861484 | 0.162169 |
| syntaxin 1A (brain)                                                   | 0.09462  |          | 0.041195 |
| chromosome 14 open reading frame 149                                  | 1.236753 | 1.140109 | 2.159416 |
| myelin expression factor 2                                            | 1.800708 | 1.217975 | 0.362736 |
| similar to selenium donor protein /// selenophosphate synthet         | 1.077534 | 1.000067 | 0.591316 |
| collagen, type III, alpha 1                                           |          | 4.807562 | 0.105899 |
| chromosome 20 open reading frame 194                                  | 1.19758  | 0.808674 | 0.422987 |
| zinc binding alcohol dehydrogenase, domain containing 1               | 0.975811 | 1.134809 | 0.909295 |

|                                                                                     |          |          |          |
|-------------------------------------------------------------------------------------|----------|----------|----------|
| hypothetical gene supported by CR391572                                             | 1.661774 | 1.751194 | 2.253166 |
| Gal 10                                                                              | 0.706422 | 2.49008  |          |
| amyotrophic lateral sclerosis 2 (juvenile) chromosome region                        | 0.902883 | 4.983303 | 0.856883 |
| ATPase family, AAA domain containing 5                                              | 0.612923 | 0.692149 | 0.45893  |
| bruno-like 6, RNA binding protein (Drosophila)                                      | 0.990934 | 2.208696 | 0.673031 |
| glucosidase, alpha; neutral C                                                       | 1.051562 | 0.835029 | 2.477508 |
| glycosyltransferase 25 domain containing 2                                          |          |          |          |
| Sel-1 suppressor of lin-12-like (C. elegans)                                        | 1.646902 | 0.779757 | 1.033688 |
| family with sequence similarity 122B                                                | 1.093748 | 1.111386 | 0.394445 |
| chromodomain helicase DNA binding protein 9                                         | 1.099829 | 0.82794  | 0.859554 |
| galactosidase, alpha                                                                | 1.511735 | 0.77245  | 2.911584 |
| galactosidase, alpha                                                                | 1.525894 | 0.963141 | 1.758656 |
| oligonucleotide/oligosaccharide-binding fold containing 2A                          | 1.17205  | 0.743965 | 0.584005 |
| EPS8-like 2                                                                         | 2.893804 | 1.082932 | 2.890734 |
| janus kinase and microtubule interacting protein 1                                  | 2.797357 |          | 1.786635 |
| tetratricopeptide repeat domain 9                                                   | 0.76841  | 3.473909 | 0.60989  |
| piwi-like 1 (Drosophila)                                                            | 0.803166 | 1.899979 | 4.503171 |
| Gen homolog 1, endonuclease (Drosophila)                                            | 1.094954 | 1.759486 | 0.459634 |
| laminin, gamma 1 (formerly LAMB2)                                                   | 0.66607  | 0.864917 | 0.503431 |
| calcium binding protein 1                                                           |          | 0.048649 | 0.42571  |
| Kelch-like 29 (Drosophila)                                                          | 2.30669  | 1.338692 | 0.646133 |
| hypothetical gene supported by CR389297                                             | 0.145762 | 0.758555 |          |
| alcohol dehydrogenase, iron containing, 1                                           | 2.731699 | 1.092269 | 1.063157 |
| structural maintenance of chromosomes 6                                             | 1.41254  | 0.746371 | 0.489025 |
| hypothetical LOC424473                                                              | 0.886866 | 0.471287 | 2.733701 |
| Solute carrier family 24, member 5                                                  | 1.429382 | 1.049148 | 0.96047  |
| oxidation resistance 1                                                              | 1.13742  | 0.98971  | 2.445937 |
| hypothetical gene supported by CR390941                                             | 1.571556 | 37.05172 |          |
| ST3 beta-galactoside alpha-2,3-sialyltransferase 5                                  | 0.71327  | 0.770657 | 0.146028 |
| Rho guanine nucleotide exchange factor (GEF) 10                                     |          |          |          |
| Hippocampus abundant transcript 1                                                   | 0.983092 | 1.401993 | 0.205477 |
| hippocampus abundant transcript 1                                                   | 0.897445 | 0.836609 | 0.33824  |
| family with sequence similarity 136, member A /// hypothetical                      | 0.635629 | 1.164704 | 1.997924 |
| KIAA0753                                                                            | 1.654989 | 0.743993 | 0.52312  |
| glycoprotein M6B                                                                    | 1.14859  |          | 2.160501 |
| yippee-like 2 (Drosophila)                                                          | 1.404017 | 0.617083 | 0.380699 |
| fibroblast growth factor 2 (basic)                                                  | 0.823499 | 0.922059 | 2.305392 |
| LON peptidase N-terminal domain and ring finger 3                                   | 0.634922 | 0.545089 | 2.573035 |
| UDP-N-acetyl-alpha-D-galactosamine:polypeptide N-acetylgalactosaminyl transferase 2 |          | 3.984968 |          |
| similar to UDP-glucose:glycoprotein glucosyltransferase 2                           | 1.51791  | 8.097808 |          |

|                                                                        |          |          |          |
|------------------------------------------------------------------------|----------|----------|----------|
| ATP-binding cassette, sub-family C (CFTR/MRP), member                  | 2.312679 | 0.647703 | 1.205614 |
| zinc finger protein 644                                                | 0.508694 | 1.121697 | 0.427194 |
| transcription elongation factor B (SIII), polypeptide 3 (110kD)        | 0.643954 | 1.268369 | 2.377119 |
| asparagine-linked glycosylation 9 homolog (S. cerevisiae, alj)         | 1.049281 | 1.14944  | 0.807828 |
| calpain 1, (mu/I) large subunit                                        | 0.96596  | 0.863417 | 2.205091 |
| solute carrier family 25, member 32                                    | 1.055752 | 0.947537 | 0.73143  |
| spectrin repeat containing, nuclear envelope 2                         | 1.015031 | 0.849125 | 1.53321  |
| hypothetical protein LOC771537                                         | 2.068852 | 0.941141 | 2.00999  |
| chromosome 8 open reading frame 41                                     | 1.530202 | 0.502381 | 1.547063 |
| scinderin                                                              | 1.235965 | 1.233624 | 0.613266 |
| nuclear receptor subfamily 3, group C, member 1 (glucocorticoid recept | 0.026333 |          |          |
| BCL2-like 15                                                           | 1.345979 | 4.893666 | 0.823287 |
| Hepatic leukemia factor                                                | 0.539346 | 1.222661 | 0.47835  |
| Protein arginine methyltransferase 8                                   | 1.13759  | 2.318639 | 0.923207 |
| dedicator of cytokinesis 3                                             |          |          |          |
| mesoderm development candidate 2                                       | 0.865314 | 0.698315 | 0.709079 |
| transmembrane emp24 domain trafficking protein 2                       | 1.276976 | 1.104803 | 0.452281 |
| coiled-coil domain containing 127                                      | 0.595063 | 0.4495   | 0.961171 |
| asparagine-linked glycosylation 14 homolog (S. cerevisiae)             | 0.785462 | 1.210396 | 1.171353 |
| TNF-related apoptosis inducing ligand-like                             |          |          |          |
| interferon induced transmembrane protein 5                             |          |          | 3.075853 |
| Fructosamine 3 kinase                                                  | 1.884481 | 1.123082 | 1.042573 |
| similar to putative endoplasmic reticulum protein family mei           | 1.89163  | 0.837798 | 0.865943 |
| pleckstrin homology domain containing, family K member 1               | 1.275188 | 0.637136 | 0.799837 |
| EPH receptor A1                                                        | 2.105513 | 1.094248 |          |
| breast cancer anti-estrogen resistance 1                               | 1.169913 | 1.006402 | 3.420632 |
| WW and C2 domain containing 1                                          | 1.414508 | 1.660037 | 3.454045 |
| Ras-related GTP binding C                                              | 0.733538 | 0.839452 | 0.437983 |
| EF-hand domain family, member A2                                       | 1.471079 | 1.529777 | 2.339141 |
| transmembrane protein 49                                               | 2.495839 | 1.274998 | 3.17881  |
| solute carrier family 25 (mitochondrial carrier; phosphate car         | 0.36285  | 0.96927  | 1.0014   |
| NKF3 kinase family member                                              |          | 3.026458 |          |
| hypothetical gene supported by CR387606                                | 0.765927 | 2.153174 | 0.497476 |
| Lymphoid enhancer-binding factor 1                                     | 0.501172 | 1.731705 | 0.247917 |
| Zinc finger protein 827                                                | 1.538833 | 0.975283 | 0.361333 |
| Choline phosphotransferase 1                                           | 2.203878 | 1.414319 | 0.479775 |
| hypothetical gene supported by CR386328                                | 1.926242 | 1.171306 | 1.477538 |
| ST6 (alpha-N-acetyl-neuraminy-2,3-beta-galactosyl-1,3)-N-              | 0.472345 | 0.761755 | 0.58108  |
| erbb2 interacting protein                                              |          |          | 3.469221 |
| ADP-ribosylation factor GTPase activating protein 2                    | 0.990867 | 0.861169 | 1.667519 |



|                                                                |          |          |          |
|----------------------------------------------------------------|----------|----------|----------|
| BTB (POZ) domain containing 3                                  | 0.756792 | 0.749072 | 0.277147 |
| chromosome 1 open reading frame 168                            | 2.491035 | 0.854418 | 2.30723  |
| Solute carrier family 26, member 11                            | 1.094386 | 0.836883 | 2.4003   |
| sphingomyelin phosphodiesterase, acid-like 3B                  | 1.923004 |          | 1.094343 |
| sphingomyelin synthase 1                                       | 1.224786 | 0.876814 | 2.185384 |
| nuclear factor I/B                                             | 2.008753 | 1.251118 | 2.597852 |
| dynein, light chain, LC8-type 2                                | 0.56533  | 0.887147 | 0.46402  |
| Cappuccino homolog (mouse)                                     | 1.166571 | 1.055639 | 0.5296   |
| zinc finger protein 292                                        | 1.002555 | 0.817257 | 0.47364  |
| fibronectin type III domain containing 3A                      | 0.783124 | 2.771555 | 1.588459 |
| Transient receptor potential cation channel, subfamily V, me   | 1.204768 | 0.913902 | 2.706939 |
| torsin A interacting protein 1                                 | 0.286188 | 0.80356  | 2.144216 |
| Dehydrogenase/reductase (SDR family) member 2                  | 1.221761 | 0.887906 | 0.399025 |
| Hypothetical LOC416414                                         | 0.844792 | 0.788017 | 0.330561 |
| spen homolog, transcriptional regulator (Drosophila)           | 0.920403 | 0.736999 | 1.426574 |
| Splicing factor, arginine/serine-rich 8 (suppressor-of-white-a | 0.753771 | 0.878388 | 0.451442 |
| solute carrier family 27 (fatty acid transporter), member 4    | 1.039432 | 0.96693  | 2.730835 |
| DCN1, defective in cullin neddylation 1, domain containing     | 1.426928 | 2.143931 | 1.054406 |
| mitogen-activated protein kinase kinase 3                      | 2.927041 | 1.230482 | 3.27125  |
| Transmembrane protein 215                                      |          |          | 0.774042 |
| Hypothetical protein LOC770202                                 | 0.827841 | 0.951101 | 0.359464 |
| similar to MGC53931 protein                                    | 0.818709 | 1.233321 | 2.288322 |
| Glucocorticoid induced transcript 1                            | 1.283412 | 1.309622 | 1.641558 |
| Retinaldehyde binding protein 1-like 1                         |          |          |          |
| POM121 membrane glycoprotein (rat)                             |          | 8.63144  |          |
| TBC1 domain family, member 22B                                 |          |          |          |
| mitochondrial tumor suppressor 1                               | 0.911998 | 0.726899 | 2.494517 |
| family with sequence similarity 101, member A                  | 1.300377 | 2.128226 | 0.446371 |
| nuclear respiratory factor 1                                   | 1.273265 | 1.075139 | 3.458977 |
| ubiquitin specific peptidase 30                                | 0.607179 |          | 2.366918 |
| similar to kinesin, putative                                   | 6.03135  | 3.856516 | 9.768168 |
| titin                                                          | 1.23016  | 0.799864 | 3.35668  |
| KIAA0319-like                                                  |          |          |          |
| Thioredoxin domain containing 10                               |          | 0.298337 |          |
| thioredoxin domain containing 10                               | 1.135058 | 0.806454 | 0.349975 |
| ATPase type 13A3                                               | 1.173596 | 1.194495 | 0.64991  |
| hypothetical gene supported by CR389067; CR406161              | 0.724944 | 2.797186 | 1.552501 |
| Patatin-like phospholipase domain containing 2                 | 1.311924 | 1.049837 | 2.576901 |
| Cdk5 and Abl enzyme substrate 1                                | 2.444449 |          | 0.941898 |
| Ankyrin repeat domain 13C                                      |          | 0.66119  | 0.258701 |

|                                                             |          |          |          |
|-------------------------------------------------------------|----------|----------|----------|
| Fibulin 2                                                   | 1.277005 | 1.833475 | 0.907438 |
| ADP-ribosylation factor-like 13B                            | 1.459333 | 0.514162 | 0.338715 |
| ring finger protein 14                                      | 1.294404 | 0.88445  | 0.984254 |
| ADAM metallopeptidase with thrombospondin type 1 motif, 13  |          | 2.137171 | 1.710339 |
| Solute carrier family 16, member 2 (monocarboxylic acid tra | 1.731516 | 1.295608 | 2.837902 |
| follistatin-like 1                                          | 2.784903 | 1.43928  | 1.212205 |
| SET binding factor 2                                        | 3.81081  |          |          |
| pleckstrin homology domain containing, family C (with FER   | 2.11264  | 1.110432 | 3.066691 |
| activity-dependent neuroprotector homeobox                  | 2.06561  | 0.548647 | 0.413516 |
| nudix (nucleoside diphosphate linked moiety X)-type motif 5 | 1.072229 | 0.631748 | 0.966379 |
| natural killer-tumor recognition sequence                   | 1.575499 | 1.028249 | 0.499835 |
| ubiquitin protein ligase E3 component n-recognin 2          |          |          | 0.086354 |
| uroplakin 1B                                                |          |          |          |
| ras homolog gene family, member C                           | 1.763911 | 1.995438 | 2.23641  |
| YY1 associated factor 2                                     | 1.338053 | 1.139073 | 0.412652 |
| acyl-CoA thioesterase 9                                     | 1.25466  | 0.823767 | 1.642813 |
| nebulin                                                     | 1.019929 | 0.596831 | 3.133365 |
| similar to nebulin /// nebulin                              | 1.199804 | 0.657053 | 3.702963 |
| family with sequence similarity 76, member B                | 1.280234 | 0.93073  | 0.703366 |
| KTI12 homolog, chromatin associated (S. cerevisiae)         |          | 0.916837 | 1.519626 |
| Arachidonate 5-lipoxygenase-activating protein              | 0.372977 | 1.122808 | 0.296386 |
| SLAIN motif family, member 2                                | 1.059699 | 0.906696 | 0.56981  |
| Hepatoma-derived growth factor (high-mobility group protei  | 0.658301 | 1.126207 | 2.183566 |
| chloride intracellular channel 2                            | 1.86396  | 1.006384 | 0.840288 |
| cell adhesion molecule 1                                    | 0.663195 | 2.038113 | 0.570898 |
| gallinacin 1                                                | 0.588128 | 1.156406 | 2.643057 |
| importin 5                                                  | 0.740738 | 1.288682 | 0.45309  |
| G protein-coupled receptor 116                              | 1.244769 | 1.327062 | 2.455646 |
| Calcium/calmodulin-dependent protein kinase (CaM kinase)    | 1.03328  | 1.126213 | 0.356881 |
| retinitis pigmentosa 2 (X-linked recessive)                 | 0.830033 | 1.17629  | 0.468027 |
| WAP four-disulfide core domain 1                            | 0.930793 | 1.346793 | 4.510736 |
| Similar to immunoglobulin-like receptor CHIR-B2             | 1.719832 |          | 0.995798 |
| activating transcription factor 3                           | 3.14317  | 1.900758 | 2.548599 |
| glutaminase                                                 | 2.06591  | 1.244791 | 0.25232  |
| ring finger protein 213                                     | 3.887599 | 1.723825 | 4.676801 |
| polymerase (RNA) mitochondrial (DNA directed)               | 11.71342 | 2.041724 | 1.008639 |
| thyroid hormone receptor interactor 12                      | 1.057039 | 1.077634 | 0.580278 |
| neutrophil cytosolic factor 2 (65kDa, chronic granulomatous | 1.001768 | 1.995652 | 2.010956 |
| neutrophil cytosolic factor 2 (65kDa, chronic granulomatous | 1.631553 | 1.76693  | 2.864808 |
| jumonji domain containing 1A                                | 2.070877 | 1.095958 | 0.349475 |

|                                                                       |          |          |          |
|-----------------------------------------------------------------------|----------|----------|----------|
| solute carrier family 30 (zinc transporter), member 6                 | 0.388821 | 1.206002 | 0.436273 |
| hypothetical LOC420411                                                | 1.231645 | 1.191207 | 2.810469 |
| solute carrier family 33 (acetyl-CoA transporter), member 1           | 1.72853  | 0.839973 | 0.260627 |
| transmembrane protein 131                                             | 1.684886 | 1.828248 | 0.218667 |
| leucine rich repeat containing 40                                     |          | 3.95425  |          |
| UDP-glucose ceramide glucosyltransferase                              | 1.160386 | 1.069619 | 0.708871 |
| KIAA1324-like                                                         | 0.35351  |          | 3.400836 |
| FERM domain containing 5                                              |          |          | 9.241431 |
| chromosome 16 open reading frame 68                                   | 0.821128 | 1.161946 | 2.24968  |
| Similar to immunoglobulin-like receptor CHIR-A                        | 0.806106 | 0.487101 | 1.588208 |
| immunoglobulin-like receptor CHIR-B5 /// immunoglobulin-              | 1.883037 | 1.005347 | 3.609002 |
| mannosyl (beta-1,4-)-glycoprotein beta-1,4-N-acetylglucosam           | 1.267975 | 1.15384  | 1.798601 |
| GLIS family zinc finger 2                                             | 0.854945 | 0.721258 | 2.131778 |
| WAP, follistatin/kazal, immunoglobulin, kunitz and netrin domain cont |          | 14.01764 |          |
| similar to LOC387763 protein                                          | 1.796381 | 1.281349 | 5.523727 |
| Spen homolog, transcriptional regulator (Drosophila)                  | 1.001021 | 1.006395 | 1.493303 |
| death inducer-obliterators 1                                          | 1.411643 | 0.518686 | 1.560305 |
| sperm associated antigen 16                                           |          | 3.184159 |          |
| adenylate cyclase 9                                                   | 0.949334 | 1.069902 | 1.616336 |
| phosphoribosyl pyrophosphate amidotransferase                         | 1.744738 | 1.466438 | 0.394926 |
| chromosome 9 open reading frame 82                                    | 0.409847 | 1.080923 | 1.198921 |
| TSR1, 20S rRNA accumulation, homolog (S. cerevisiae)                  | 0.570165 | 0.856957 | 2.22642  |
| Similar to chromosome 6 open reading frame 60                         | 0.08413  | 0.46488  |          |
| hypothetical gene supported by CR388594                               | 0.277383 | 0.958078 |          |
| chromosome 6 open reading frame 60                                    | 1.028479 | 0.61246  | 0.499005 |
| kinesin family member 5C                                              | 0.266222 | 1.072567 |          |
| tumor necrosis factor receptor superfamily, member 13B                |          |          |          |
| Membrane associated guanylate kinase, WW and PDZ domain               | 1.470988 | 1.654779 | 2.027378 |
| guanylate binding protein                                             | 5.197248 | 1.407721 | 13.67494 |
| pumilio homolog 2 (Drosophila)                                        | 1.268037 | 1.183371 | 0.474422 |
| heterogeneous nuclear ribonucleoprotein A3                            | 1.007632 | 0.634696 | 0.247964 |
| chromosome 10 open reading frame 47                                   |          | 0.776395 | 0.141641 |
| Nedd4 family interacting protein 1                                    | 0.667755 | 0.943712 | 3.221432 |
| KIAA1217                                                              |          |          | 1.574721 |
| solute carrier organic anion transporter family, member 2B1           | 1.065745 | 1.22886  | 2.405431 |
| integrin, alpha 8                                                     |          | 2.30072  |          |
| integrin, alpha 8                                                     | 0.980763 | 1.488495 | 3.515881 |
| similar to hypothetical protein FLJ32658                              |          |          | 0.055509 |
| similar to LOC129293 protein                                          | 1.310002 | 0.43417  | 1.065546 |
| docking protein 7                                                     | 1.648113 | 2.404147 |          |

|                                                                      |          |          |          |
|----------------------------------------------------------------------|----------|----------|----------|
| tetraspanin 12                                                       |          |          | 0.242807 |
| SH3 domain containing ring finger 1                                  | 0.388283 | 0.332933 |          |
| spectrin repeat containing, nuclear envelope 2                       |          |          |          |
| avidin related protein 2 /// hypothetical LOC427416                  | 0.286981 | 0.308797 | 1.625744 |
| Fanconi anemia, complementation group A                              | 0.484675 | 0.687464 |          |
| nuclear receptor binding SET domain protein 1                        |          |          |          |
| Splicing factor, arginine/serine-rich 11                             | 0.921455 | 1.125029 | 1.687542 |
| coiled-coil domain containing 91                                     | 0.705118 | 0.762583 | 0.469946 |
| Neural cell adhesion molecule 1                                      | 1.145693 | 1.155802 | 3.82426  |
| anaphase promoting complex subunit 4                                 | 0.828836 | 1.138011 | 0.767306 |
| pleckstrin homology domain containing, family B (evectins)           | 0.750086 | 1.084217 | 0.702508 |
| sphingomyelin phosphodiesterase 4, neutral membrane (neut            | 0.79253  |          | 2.513927 |
| hypothetical gene supported by CR389209                              |          |          | 9.585346 |
| TSC22 domain family, member 1                                        | 1.24648  | 0.693119 | 0.497655 |
| TSC22 domain family, member 1                                        | 1.474437 | 0.753327 | 0.333331 |
| similar to Auh protein                                               | 0.343635 | 0.747128 | 1.972718 |
| similar to Auh protein                                               | 0.298987 | 0.899284 | 3.350374 |
| FERM domain containing 4B                                            | 0.833797 | 0.677636 | 1.702327 |
| janus kinase and microtubule interacting protein 2                   |          |          | 2.334153 |
| ribosomal protein L29                                                | 0.665167 | 1.075925 | 0.491537 |
| zinc finger CCCH-type, antiviral 1                                   | 3.230821 | 1.499093 | 1.80952  |
| ATP-binding cassette, sub-family B (MDR/TAP), member 10              |          |          | 0.351554 |
| protein kinase, cAMP-dependent, catalytic, beta                      | 1.114926 | 0.876749 | 0.229844 |
| DEAD (Asp-Glu-Ala-Asp) box polypeptide 49                            | 3.723095 |          |          |
| similar to Protein C20orf129                                         | 0.68987  | 1.231663 | 2.013758 |
| similar to Dual specificity protein phosphatase 13 (Testis- an       | 0.988075 |          | 2.908156 |
| solute carrier family 35, member B4                                  | 6.152582 |          |          |
| solute carrier family 35, member B4                                  |          | 1.264526 |          |
| E4F transcription factor 1                                           | 1.386407 | 0.469723 | 0.657566 |
| protein tyrosine phosphatase-like (proline instead of catalytic      | 0.667491 | 2.40114  | 0.720725 |
| SOUL protein                                                         | 1.528827 | 0.384904 | 1.94283  |
| FERM domain containing 1                                             | 1.060861 |          |          |
| asp (abnormal spindle) homolog, microcephaly associated (Drosophila) |          |          |          |
| FK506 binding protein 6, 36kDa                                       | 1.120877 | 1.649337 | 1.578851 |
| heat shock 27kDa protein 1                                           | 1.727075 | 0.605875 | 2.05219  |
| myotubularin related protein 8                                       | 0.419169 | 2.397535 | 0.720739 |
| CCR4-NOT transcription complex, subunit 2                            | 1.449189 |          | 21.70014 |
| lactase                                                              |          | 0.920452 | 2.915142 |
| NMDA receptor regulated 2                                            |          | 5.027103 |          |
| plexin C1                                                            | 0.7946   | 0.272725 | 0.915976 |

|                                                                       |          |          |          |
|-----------------------------------------------------------------------|----------|----------|----------|
| Hypothetical LOC429096                                                | 4.129702 |          | 0.767064 |
| similar to hypothetical protein FLJ10081                              |          | 0.88223  |          |
| Zinc finger, DHHC-type containing 21                                  | 0.885465 | 0.857087 | 0.490504 |
| putative neuronal cell adhesion molecule                              | 0.675646 | 0.637212 | 0.267715 |
| tubulin, beta 2B                                                      | 0.712304 | 1.094548 | 0.443824 |
| Basonuclin 1                                                          |          | 17.23839 |          |
| BCL6 co-repressor                                                     | 1.221539 |          |          |
| transmembrane protein 59                                              | 0.550417 | 0.886112 | 0.348135 |
| adaptor-related protein complex 3, delta 1 subunit                    | 0.668807 | 0.86007  | 1.84392  |
| Peroxisome biogenesis factor 1                                        | 0.826029 | 0.633597 | 0.727568 |
| sal-like 1 (Drosophila)                                               | 2.970838 | 1.32998  | 0.902364 |
| sal-like 1 (Drosophila)                                               | 2.247962 |          |          |
| deiodinase, iodothyronine, type II                                    | 2.333705 | 1.356145 | 2.269224 |
| regulator of telomere elongation helicase 1                           | 5.555022 | 0.833882 |          |
| chromosome 9 open reading frame 75                                    | 2.270344 | 1.115731 | 4.472449 |
| Notch homolog 1, translocation-associated (Drosophila)                | 0.574769 | 0.374786 |          |
| nuclear receptor co-repressor 1                                       | 1.112994 | 0.870316 | 0.427353 |
| Similar to Hypothetical protein BC001096                              | 2.08551  | 1.045119 | 1.7969   |
| PET112-like (yeast)                                                   | 0.823506 | 0.927025 | 0.655306 |
| hypothetical protein LOC768462                                        | 2.181506 | 1.670577 | 0.715585 |
| Golgi associated, gamma adaptin ear containing, ARF binding protein 2 |          |          |          |
| Golgi associated, gamma adaptin ear containing, ARF bindir            | 0.77757  | 1.676627 | 25.96041 |
| progesterone receptor membrane component 1                            | 0.775342 | 1.057465 | 2.577742 |
| KIAA2018                                                              | 0.43919  |          |          |
| protein tyrosine phosphatase-like A domain containing 1               |          |          | 31.56909 |
| mutS homolog 6 (E. coli)                                              | 0.66391  | 0.651465 | 0.468837 |
| mutS homolog 6 (E. coli)                                              | 1.098121 | 1.144457 | 0.439005 |
| ankyrin repeat domain 26                                              | 1.2199   | 0.796877 | 0.637942 |
| Similar to DNA helicase HEL308                                        | 2.016216 |          |          |
| Similar to DNA helicase HEL308                                        | 1.720846 | 1.81701  | 2.695311 |
| helicase, POLQ-like                                                   | 1.161122 | 1.209872 | 2.627257 |
| RAB11B, member RAS oncogene family                                    |          | 0.734902 | 0.345654 |
| chromosome 14 open reading frame 135                                  |          | 0.688771 |          |
| UDP glycosyltransferase 8                                             | 2.013385 | 0.842684 | 0.713087 |
| SLIT and NTRK-like family, member 2                                   | 0.863406 | 1.217512 | 0.130558 |
| solute carrier family 16, member 10 (aromatic amino acid tra          | 0.852969 | 1.330009 | 2.456718 |
| Hypothetical LOC422400                                                |          | 1.95689  |          |
| opioid growth factor receptor-like 1                                  |          |          |          |
| sulfatase 1                                                           | 2.130678 | 2.700554 |          |
| Hypothetical protein LOC771883                                        | 0.076584 |          |          |

|                                                               |          |          |          |
|---------------------------------------------------------------|----------|----------|----------|
| SRY (sex determining region Y)-box 30                         |          | 4.432604 |          |
| similar to Egfl3 protein                                      | 2.255776 |          | 0.518378 |
| Ca <sup>2+</sup> -dependent secretion activator               |          | 3.6979   |          |
| signal peptide, CUB domain, EGF-like 2                        |          | 0.311751 |          |
| chondroitin sulfate proteoglycan 5 (neuroglycan C)            |          |          |          |
| chromosome 16 open reading frame 62                           | 0.409003 |          | 1.05826  |
| sterile alpha motif domain containing 13                      | 1.07312  | 1.264249 | 0.32561  |
| ubiquitin associated and SH3 domain containing, B             |          |          | 2.077788 |
| Chromosome 10 open reading frame 54                           | 0.866054 | 0.728649 | 2.854793 |
| Hypothetical LOC423545                                        |          | 14.14457 |          |
| spindlin 1                                                    | 7.413218 | 1.969263 | 0.223725 |
| ATP-binding cassette, sub-family D (ALD), member 3            | 1.22596  | 1.185006 | 0.385424 |
| protein tyrosine phosphatase, receptor type, F                | 1.282605 | 0.600108 | 0.331037 |
| Metaxin 3                                                     | 0.790795 | 0.820154 | 0.656531 |
| dedicator of cytokinesis 8                                    | 0.800805 | 0.956412 | 4.154333 |
| Rab interacting lysosomal protein                             | 0.795449 | 0.774151 | 1.502267 |
| Hypothetical LOC429131                                        |          |          |          |
| XK, Kell blood group complex subunit-related family, meml     | 1.525307 | 0.948524 | 0.932378 |
| protein tyrosine phosphatase, receptor type, S                | 2.018413 | 1.203966 | 1.658715 |
| parvin, alpha                                                 | 1.158769 | 0.883695 | 0.401977 |
| similar to FNDC3 protein                                      |          | 2.709738 |          |
| AP2 associated kinase 1                                       | 1.483574 | 0.947629 | 2.01831  |
| ankyrin repeat domain 50                                      |          |          | 0.75449  |
| transcription elongation factor A (SII), 1                    | 1.360349 | 1.46514  | 1.244028 |
| leucyl-tRNA synthetase                                        | 0.943741 |          | 0.322221 |
| phospholipase A2 receptor 1, 180kDa                           | 2.679903 | 2.138547 | 6.068629 |
| MutS homolog 3 (E. coli)                                      | 0.047366 |          |          |
| ADAM metallopeptidase with thrombospondin type 1 motif,       | 0.031412 | 37.78676 |          |
| chromosome 22 open reading frame 30                           | 1.55802  | 0.722638 | 0.467472 |
| serine palmitoyltransferase, long chain base subunit 3        | 2.812488 | 0.59456  | 1.470808 |
| vacuolar protein sorting 53 homolog (S. cerevisiae)           | 0.898325 | 1.0778   | 2.21485  |
| mitochondrial ribosomal protein L41                           | 0.729319 | 0.771892 | 1.900821 |
| coiled-coil domain containing 125                             |          | 0.557707 | 0.441409 |
| ligand dependent nuclear receptor corepressor-like            | 1.895867 | 0.491597 | 0.608985 |
| hypothetical gene supported by CR391077                       |          | 2.013996 | 1.362057 |
| sirtuin (silent mating type information regulation 2 homolog) | 0.732891 | 0.75718  | 1.405729 |
| transmembrane and coiled-coil domain family 3                 |          |          | 21.27035 |
| similar to rapamycin insensitive companion of mTOR; rictor    | 0.472009 | 1.132377 | 1.938342 |
| similar to hypothetical protein AN5649.2                      | 0.446864 |          |          |
| sal-like 4 (Drosophila)                                       | 6.718767 | 1.525726 |          |

|                                                               |          |          |          |
|---------------------------------------------------------------|----------|----------|----------|
| Hypothetical protein LOC777388                                |          |          |          |
| mucin 1, cell surface associated                              | 1.452279 | 0.731963 | 0.502027 |
| hypothetical gene supported by CR391215                       | 1.835762 | 1.476587 | 2.102361 |
| lung lectin                                                   | 0.946002 | 2.412724 | 2.425365 |
| family with sequence similarity 84, member A                  | 0.902135 | 0.604377 | 0.3336   |
| hypothetical protein LOC769331                                |          |          |          |
| transmembrane and coiled-coil domains 3                       | 9.757479 | 1.03822  | 0.148281 |
| F-box and leucine-rich repeat protein 10                      |          | 0.912601 |          |
| dihydrolipoamide branched chain transacylase E2               | 1.041967 | 0.77799  | 0.280921 |
| Rho GTPase activating protein 5                               | 1.721259 | 0.881208 | 0.380526 |
| family with sequence similarity 96, member B                  | 0.404715 | 1.0972   | 0.999562 |
| alveolar soft part sarcoma chromosome region, candidate 1     | 0.964838 | 0.607965 | 0.339039 |
| centrosomal protein 192kDa                                    | 1.559448 | 0.926823 | 0.41008  |
| cyclin Y-like 1                                               |          | 1.013467 |          |
| echinoderm microtubule associated protein like 1              | 4.9084   | 0.929039 |          |
| fidgetin-like 1                                               | 0.890396 | 1.151518 | 0.848738 |
| ELAV (embryonic lethal, abnormal vision, Drosophila)-like     | 1.525213 | 0.804659 | 0.359643 |
| nei endonuclease VIII-like 3 (E. coli)                        | 0.692948 | 0.699894 | 0.36437  |
| ADAM metallopeptidase with thrombospondin type 1 motif,       | 0.106227 |          |          |
| similar to cDNA sequence BC016423                             |          | 0.950731 | 4.941025 |
| archain 1                                                     | 1.253843 | 0.990392 | 0.74175  |
| LanC lantibiotic synthetase component C-like 2 (bacterial)    | 0.782021 | 1.335547 | 3.028461 |
| Hypothetical LOC418298                                        | 0.862283 | 1.216829 | 0.917992 |
| solute carrier family 25, member 28                           | 2.027351 | 0.58867  | 0.97069  |
| structural maintenance of chromosomes 6                       | 1.189416 | 1.070695 | 0.787902 |
| ectonucleoside triphosphate diphosphohydrolase 1              | 0.779772 | 1.397078 | 1.084653 |
| similar to KIAA1546 protein                                   | 1.24358  | 2.64625  | 1.279354 |
| ATP citrate lyase                                             |          |          | 0.084866 |
| similar to FLJ42526 protein                                   | 2.349956 | 1.641735 |          |
| hydroxysteroid (11-beta) dehydrogenase 1-like                 | 3.594263 | 1.296746 | 1.20101  |
| RAB39B, member RAS oncogene family                            | 0.9615   | 0.846791 | 0.457266 |
| programmed cell death 1                                       | 0.702331 | 1.261662 | 0.444481 |
| small nuclear ribonucleoprotein D3 polypeptide 18kDa          | 0.877942 | 1.16463  | 0.604271 |
| glucocorticoid induced transcript 1                           | 1.251932 | 1.658271 | 1.953372 |
| myosin, light chain 1, alkali; skeletal, fast                 | 1.315895 | 1.4413   | 2.156397 |
| v-yes-1 Yamaguchi sarcoma viral oncogene homolog 1            | 0.014355 |          | 0.897659 |
| v-yes-1 Yamaguchi sarcoma viral oncogene homolog 1            | 0.34743  | 1.479084 | 1.431817 |
| guanine nucleotide binding protein (G protein), alpha inhibit | 1.139826 | 1.337544 | 0.449402 |
| guanine nucleotide binding protein (G protein), alpha inhibit | 1.168464 | 1.583013 | 0.867786 |
| Notch homolog 2 (Drosophila)                                  |          |          | 2.407026 |

|                                                              |          |          |          |
|--------------------------------------------------------------|----------|----------|----------|
| par-3 partitioning defective 3 homolog (C. elegans)          | 1.304371 | 1.430793 | 3.868698 |
| protein tyrosine phosphatase type IVA, member 3              | 0.822699 | 0.617816 | 0.348874 |
| trinucleotide repeat containing 15                           | 1.101429 | 0.701803 | 0.640163 |
| Protein tyrosine phosphatase type IVA, member 1              | 1.11993  | 0.909715 | 1.508766 |
| Ras association (RalGDS/AF-6) domain family 5                | 0.908278 | 0.802495 | 0.77454  |
| serine carboxypeptidase 1                                    | 1.517689 | 1.388808 | 2.179563 |
| acyl-CoA synthetase long-chain family member 1               | 1.030276 |          |          |
| phosphatidylinositol-3,4,5-trisphosphate-dependent Rac excl  | 1.781078 | 1.558201 | 3.712039 |
| ADNP homeobox 2                                              | 1.306025 | 0.825649 | 0.480706 |
| transforming, acidic coiled-coil containing protein 1        | 1.248081 | 1.113974 | 2.076699 |
| Ubiquitin specific peptidase 9, X-linked                     | 6.177838 |          |          |
| gamma-aminobutyric acid (GABA) A receptor, gamma 2           |          |          |          |
| Vpr (HIV-1) binding protein                                  | 0.734655 | 1.341286 | 2.619565 |
| polymerase (DNA directed), lambda                            | 0.959569 | 1.17957  | 5.461015 |
| antigen identified by monoclonal antibody Ki-67              | 0.784134 | 0.958176 | 0.700498 |
| similar to RIKEN cDNA 1700047I17                             | 1.054232 | 0.579815 | 0.232272 |
| guanylate binding protein family, member 6                   |          | 0.360642 | 2.80234  |
| transmembrane BAX inhibitor motif containing 1               | 0.855775 | 0.972786 | 2.013626 |
| RNA binding motif protein 16                                 | 1.225397 | 0.823215 | 0.308194 |
| inositol 1,3,4-triphosphate 5/6 kinase                       |          | 0.165253 |          |
| NUAK family, SNF1-like kinase, 1                             | 1.308531 | 1.243099 | 2.09495  |
| nestin                                                       | 0.987374 | 1.509813 | 2.313301 |
| diacylglycerol kinase, iota                                  |          |          | 40.35094 |
| interleukin 1, beta                                          | 2.495466 |          | 1.770766 |
| splicing factor, arginine/serine-rich 11                     | 1.518729 | 0.954336 | 0.693352 |
| Solute carrier family 29 (nucleoside transporters), member 3 | 0.992904 | 0.879775 | 0.496765 |
| family with sequence similarity 134, member C                | 0.872207 | 0.86664  | 0.474808 |
| zinc finger and BTB domain containing 1                      | 1.615276 | 0.632589 | 0.385102 |
| similar to similar to expressed sequence AI316785 /// USP6   | 0.637589 | 1.301813 | 0.17546  |
| amylase, alpha 2A; pancreatic                                | 2.114347 | 0.824184 | 1.821968 |
| Dual specificity phosphatase 5                               | 2.882029 | 0.969417 | 1.329652 |
| zinc finger, DHHC-type containing 23                         | 0.891793 | 0.408745 | 1.062019 |
| kinesin family member 3B                                     | 1.076731 | 1.458928 | 1.516529 |
| CDC5 cell division cycle 5-like (S. pombe)                   | 0.445379 | 1.395525 | 1.804445 |
| isocitrate dehydrogenase 3 (NAD+) alpha                      | 0.320904 | 0.889522 | 1.183563 |
| interleukin 18 (interferon-gamma-inducing factor)            | 5.627726 | 2.65775  | 14.82556 |
| GTPase activating protein and VPS9 domains 1                 |          |          | 0.058716 |
| chromosome 11 open reading frame 46                          | 1.222705 | 0.539579 | 0.400107 |
| Secernin 1                                                   | 2.590006 |          | 0.973834 |
| cysteine-rich secretory protein LCCL domain containing 1     | 3.202246 | 2.470281 | 2.239454 |



|                                                                                          |          |          |          |
|------------------------------------------------------------------------------------------|----------|----------|----------|
| Peroxidasin homolog (Drosophila)                                                         | 1.458982 | 1.150971 | 0.599399 |
| TEL2, telomere maintenance 2, homolog (S. cerevisiae)                                    | 0.862151 | 0.031883 | 0.046401 |
| Vps20-associated 1 homolog (S. cerevisiae)                                               | 1.141636 | 1.096116 | 0.396733 |
| v-ral simian leukemia viral oncogene homolog B (ras related chromodomain protein, Y-like | 0.793073 | 0.941674 | 0.648438 |
|                                                                                          |          |          | 0.495669 |
| solute carrier family 39 (zinc transporter), member 6                                    | 6.80279  | 4.047414 | 1.263753 |
| ADP-ribosylation factor-like 2 binding protein                                           | 0.728664 | 1.374242 | 1.409538 |
| growth hormone secretagogue receptor                                                     |          | 0.47758  |          |
| chromosome 6 open reading frame 192                                                      | 0.94664  | 1.484577 | 2.593807 |
| Diacylglycerol kinase, delta 130kDa                                                      | 1.47674  | 1.023151 | 2.828617 |
| catenin (cadherin-associated protein), delta 1                                           | 1.256848 | 1.259861 | 2.787941 |
| ankyrin repeat domain 28                                                                 | 1.576615 | 1.256014 | 2.19511  |
| Ubiquinol-cytochrome c reductase complex chaperone, CBP                                  | 1.312979 | 1.028362 | 0.537328 |
| methytransferase like 5                                                                  | 0.654211 | 0.874151 | 0.430862 |
| replication factor C (activator 1) 1, 145kDa                                             | 1.147816 | 1.193731 | 0.74944  |
| Muscle-restricted coiled-coil protein                                                    | 0.766329 | 0.750381 | 0.239471 |
| retinoblastoma binding protein 6                                                         | 0.646574 | 1.248938 | 0.422108 |
| sorting nexin family member 21                                                           | 2.137133 | 0.621667 | 2.494916 |
| Cyclin J                                                                                 | 1.794307 | 1.231493 | 0.457487 |
| Hypothetical LOC417822                                                                   | 0.967984 | 0.486381 | 0.179821 |
| similar to similar to CDNA sequence BC043118                                             | 1.332586 | 2.020714 | 1.258031 |
| Cache domain containing 1                                                                | 1.106079 | 1.52933  | 0.834733 |
| solute carrier family 10 (sodium/bile acid cotransporter family), member 7               |          |          | 0.881563 |
| ret proto-oncogene                                                                       | 1.032179 | 1.951045 | 6.708891 |
| cadherin 2, type 1, N-cadherin (neuronal)                                                | 2.399815 | 1.36145  | 1.216971 |
| Myoneurin                                                                                | 1.074761 | 1.084118 | 0.489316 |
| Similar to trans-Golgi protein GMx33                                                     | 7.840203 | 0.896614 | 0.188312 |
| limb region 1 homolog (mouse)                                                            | 1.164768 | 0.990425 | 0.436476 |
| MAX interactor 1                                                                         | 2.030275 | 1.435534 | 1.579676 |
| similar to FKSG11                                                                        | 3.749151 | 0.619642 | 2.199139 |
| ER lipid raft associated 1                                                               | 1.110017 | 1.03417  | 0.401409 |
| kelch repeat and BTB (POZ) domain containing 10                                          | 1.294059 | 0.999993 | 4.361946 |
| Seizure related 6 homolog (mouse)-like                                                   | 0.449949 | 1.157626 | 0.765888 |
| hypothetical gene supported by CR406964                                                  | 1.100029 | 0.904584 | 0.601316 |
| Hypothetical LOC421229                                                                   | 0.470308 | 1.181485 | 0.024995 |
| Similar to PIAS-like protein hZimp10                                                     | 1.071358 | 0.737996 | 0.820697 |
| ST8 alpha-N-acetyl-neuraminide alpha-2,8-sialyltransferase 5                             |          |          |          |
| GA binding protein transcription factor, beta subunit 2                                  | 1.008964 | 1.011387 | 0.893804 |
| ZXD family zinc finger C                                                                 | 1.317222 | 1.054622 | 0.481367 |
| RAB GTPase activating protein 1                                                          | 1.341778 | 0.465086 |          |

|                                                                       |          |          |          |
|-----------------------------------------------------------------------|----------|----------|----------|
| bromodomain and WD repeat domain containing 1                         |          | 0.486544 | 1.468212 |
| Paired related homeobox 2                                             | 1.434169 | 0.693626 | 3.31354  |
| TBC1 (tre-2/USP6, BUB2, cdc16) domain family, member 1                | 0.965588 | 0.90561  | 0.538572 |
| RAN binding protein 1                                                 | 0.861301 | 1.242891 | 0.805806 |
| retinoblastoma binding protein 6                                      |          | 8.028213 | 0.050572 |
| growth arrest and DNA-damage-inducible, alpha                         | 0.517658 | 0.834384 | 0.478646 |
| Similar to hypothetical protein MGC42105                              |          | 0.242306 |          |
| similar to endoU protein                                              | 0.883651 | 5.731008 | 1.434289 |
| hypothetical gene supported by CR406014                               | 2.048923 | 0.458724 | 0.525292 |
| aldehyde dehydrogenase 9 family, member A1                            |          | 1.452486 | 0.3642   |
| CLPTM1-like                                                           | 2.694037 | 0.648775 | 1.361726 |
| phosphoribosyl pyrophosphate synthetase 1                             | 0.720832 | 1.396955 | 0.688674 |
| transmembrane protein 57                                              | 6.30176  |          |          |
| solute carrier family 35, member E3                                   | 1.664004 | 0.695286 | 0.782906 |
| Solute carrier family 16, member 2 (monocarboxylic acid tra           | 1.191067 | 0.866971 | 1.421298 |
| R-spondin 3 homolog (Xenopus laevis)                                  | 2.16162  | 1.182292 | 4.625516 |
| ST8 alpha-N-acetyl-neuraminide alpha-2,8-sialyltransferase 3          |          | 1.682572 | 2.334378 |
| hypothetical protein LOC772031                                        | 0.455777 | 1.606161 | 2.008477 |
| Nasal embryonic LHRH factor                                           |          | 2.379555 | 0.137127 |
| v-crk sarcoma virus CT10 oncogene                                     | 1.0862   | 1.369962 | 0.472484 |
| hypothetical gene supported by CR406681                               |          | 1.576401 |          |
| epoxide hydrolase 2, cytoplasmic                                      | 1.057181 | 1.231639 | 3.571159 |
| Zinc finger protein 704                                               | 1.113342 | 0.785828 | 0.421716 |
| Chromosome 10 open reading frame 38                                   | 0.649246 | 1.476538 | 0.209586 |
| Mitochondrial ribosomal protein L20                                   | 1.37842  | 0.335882 | 1.273837 |
| melanoma inhibitory activity family, member 3                         | 1.137578 | 1.113342 | 5.79873  |
| ST6 (alpha-N-acetyl-neuraminyl-2,3-beta-galactosyl-1,3)-N-acetylgalac |          | 3.428819 |          |
| similar to RIKEN cDNA 2700049P18                                      | 0.721552 | 1.104771 | 0.419462 |
| Fatty acid desaturase 2                                               | 0.598023 | 1.01016  | 0.551706 |
| torsin A interacting protein 2                                        |          | 4.569411 |          |
| trinucleotide repeat containing 6C                                    | 2.968726 | 0.687509 | 0.929783 |
| myb-like, SWIRM and MPN domains 1                                     |          | 0.324028 |          |
| BMP2 inducible kinase                                                 | 0.657538 | 0.887331 | 0.582785 |
| Ninein (GSK3B interacting protein)                                    | 1.347902 | 0.926345 | 0.380284 |
| ataxin 7                                                              | 1.226957 | 0.956155 | 0.776626 |
| Epithelial membrane protein 1                                         | 1.547678 | 1.293933 | 5.386149 |
| mediator complex subunit 13                                           |          |          |          |
| cytochrome P450, family 26, subfamily C, polypeptide 1                | 0.897096 | 0.383278 | 0.963505 |
| RAB22A, member RAS oncogene family                                    | 1.600618 | 0.744252 | 0.452345 |
| Nucleolar protein 12                                                  | 0.499469 | 0.21595  | 2.082225 |

|                                                                  |          |          |          |
|------------------------------------------------------------------|----------|----------|----------|
| Cas-Br-M (murine) ecotropic retroviral transforming sequen       | 0.988685 | 1.134439 | 0.30594  |
| Lysyl oxidase-like 3                                             |          |          | 3.57193  |
| Similar to MEG3                                                  | 1.423652 | 1.240147 | 3.469322 |
| acyl-CoA thioesterase 9                                          |          |          | 2.05587  |
| collagen, type IV, alpha 2                                       | 1.919938 | 1.034933 | 2.432577 |
| frizzled homolog 4 (Drosophila)                                  | 1.890019 | 0.981431 | 4.70861  |
| hypothetical protein LOC772356                                   | 2.587585 | 1.104711 | 4.485047 |
| similar to UDP-glucose ceramide glucosyltransferase-like 1       | 2.01734  | 1.060828 | 0.565662 |
| transducin-like enhancer of split 3 (E(sp1) homolog, Drosophila) |          | 0.458136 | 0.715751 |
| KIAA0368                                                         | 0.514979 | 1.026476 | 5.928019 |
| Similar to pol                                                   |          |          | 1.33519  |
| ADAM metallopeptidase domain 28                                  | 2.593618 | 1.668543 | 1.988658 |
| CD44 molecule (Indian blood group)                               | 0.937998 | 0.771527 | 0.394288 |
| Hypothetical LOC417937                                           | 2.038274 | 1.285322 | 2.59169  |
| carbohydrate sulfotransferase 10                                 | 1.452362 | 0.903871 | 0.675888 |
| ankyrin repeat domain 32                                         | 0.656151 | 0.709872 | 0.940239 |
| solute carrier family 25, member 39                              |          |          | 0.348722 |
| ring finger protein 34                                           |          | 0.753242 |          |
| ring finger protein 34                                           | 2.114659 | 0.926972 | 1.409267 |
| coiled-coil domain containing 73                                 | 3.286166 | 0.658434 |          |
| MAP7 domain containing 3                                         | 2.622559 | 0.442457 | 1.120079 |
| transmembrane protein 106C                                       | 1.203674 | 2.118425 | 3.418888 |
| titin                                                            | 0.754466 | 1.160512 | 5.148635 |
| titin                                                            | 0.800775 | 1.200612 | 2.6746   |
| titin                                                            | 1.348194 | 1.474374 | 3.319728 |
| titin                                                            |          |          | 10.14445 |
| ERGIC and golgi 2                                                | 0.873561 | 0.903619 | 1.865305 |
| nuclear transcription factor Y, alpha                            | 1.188092 | 0.918717 | 0.654114 |
| Similar to similar to CDNA sequence BC043118                     | 1.096876 | 0.666962 | 2.16371  |
| G protein-coupled receptor 149                                   | 13.09752 | 4.611315 | 3.663429 |
| FAT tumor suppressor homolog 3 (Drosophila)                      |          | 0.231337 | 0.702382 |
| Hypothetical LOC419269                                           |          |          | 20.01099 |
| GRB2-associated binding protein 1                                |          | 2.071469 | 0.873502 |
| chromosome 14 open reading frame 143                             | 0.969251 | 1.705357 | 2.347784 |
| chromosome 20 open reading frame 58                              | 2.173892 |          |          |
| hypothetical gene supported by CR405884                          | 0.410026 | 0.809373 | 0.132256 |
| chromosome 15 open reading frame 23                              | 0.814407 | 0.989911 | 0.598965 |
| transmembrane and tetratricopeptide repeat containing 1          |          |          |          |
| transmembrane and tetratricopeptide repeat containing 1          | 0.746541 | 0.557353 |          |
| purinergic receptor P2Y, G-protein coupled, 8                    | 2.032976 | 1.378374 | 1.085822 |

|                                                                        |          |          |          |
|------------------------------------------------------------------------|----------|----------|----------|
| peroxisomal proliferator-activated receptor A interacting con          | 0.453645 |          | 1.173887 |
| FERM and PDZ domain containing 2                                       | 0.365517 |          |          |
| Heterogeneous nuclear ribonucleoprotein K                              | 18.81659 | 2.933654 | 0.344409 |
| Heterogeneous nuclear ribonucleoprotein K                              | 25.81952 | 1.735626 | 0.255857 |
| CDC28 protein kinase regulatory subunit 2                              | 0.368561 | 1.007839 | 0.94925  |
| coiled-coil domain containing 103                                      | 1.442957 | 1.254054 | 0.976645 |
| Influenza virus NS1A binding protein                                   | 1.614534 |          | 12.68456 |
| ubiquinol-cytochrome c reductase binding protein                       | 1.350747 | 0.974595 | 0.4752   |
| myoglobin                                                              | 0.715532 | 0.276972 | 0.348812 |
| Similar to KIAA0644 protein                                            | 0.641621 | 0.83459  | 0.121106 |
| hypothetical gene supported by CR406167                                | 0.674513 | 0.655224 | 0.275772 |
| PHD finger protein 2                                                   | 1.064952 | 0.712597 | 0.310244 |
| Transmembrane protein 179                                              | 0.430841 |          |          |
| Similar to coiled-coil domain protein D53                              |          |          |          |
| myosin X                                                               | 0.944193 | 0.788841 | 0.287282 |
| myosin X                                                               | 0.951682 | 0.673525 | 0.254473 |
| iduronidase, alpha-L-                                                  |          |          |          |
| protein kinase N2                                                      | 0.892054 | 1.408024 | 0.23616  |
| doublecortin-like kinase 1                                             | 1.608297 | 0.90594  | 0.178759 |
| notum pectinacetylsterase homolog (Drosophila)                         | 0.649534 | 0.905129 | 3.523738 |
| Hypothetical LOC415615                                                 | 0.484239 | 0.982552 | 0.816337 |
| phosphatidylinositol-3,4,5-trisphosphate-dependent Rac exchange factor |          | 1.275772 |          |
| protein phosphatase 4, regulatory subunit 1                            | 1.141502 | 0.361679 | 0.552428 |
| Family with sequence similarity 107, member B                          | 1.046052 | 0.901287 | 0.494392 |
| DCN1, defective in cullin neddylation 1, domain containing             | 0.886709 | 0.896192 | 0.499425 |
| Enah/Vasp-like                                                         | 0.228024 |          | 0.667322 |
| Hypothetical LOC427846                                                 | 0.348692 | 0.977194 |          |
| Hypothetical LOC427846                                                 | 0.860495 | 0.593206 | 3.096736 |
| forkhead box O3                                                        | 0.45475  | 0.473214 | 0.585106 |
| ATG2 autophagy related 2 homolog B (S. cerevisiae)                     | 1.692388 | 0.532868 | 1.223057 |
| uridine phosphorylase 2                                                |          | 1.119216 |          |
| coagulation factor V (proaccelerin, labile factor)                     | 2.389683 |          |          |
| diaphanous homolog 3 (Drosophila)                                      | 1.037609 | 1.29846  | 0.541768 |
| molybdenum cofactor sulfurase                                          | 1.53643  | 4.626714 |          |
| similar to echinoderm microtubule associated protein like 5            | 0.388118 | 0.969873 |          |
| G protein-coupled receptor 97                                          | 1.236344 | 0.667047 | 0.754034 |
| Vacuolar protein sorting 41 homolog (S. cerevisiae)                    | 0.853149 | 1.11025  | 0.377409 |
| Vacuolar protein sorting 41 homolog (S. cerevisiae)                    | 3.150085 | 0.588575 | 0.367972 |
| claudin 15                                                             | 1.699181 | 2.888036 | 0.926927 |
| low density lipoprotein-related protein 12                             | 1.521938 | 0.915947 | 0.277381 |

|                                                               |          |          |          |
|---------------------------------------------------------------|----------|----------|----------|
| Chromosome 14 open reading frame 32                           | 1.747954 | 1.420496 | 0.808337 |
| matrix metallopeptidase 9 (gelatinase B, 92kDa gelatinase, 9  | 7.579496 |          | 4.315287 |
| zinc finger, ZZ-type with EF-hand domain 1                    |          | 1.240753 | 0.20542  |
| DIP2 disco-interacting protein 2 homolog A (Drosophila)       |          | 0.487496 | 0.586937 |
| MAD2 mitotic arrest deficient-like 1 (yeast)                  | 0.668617 | 1.128313 | 0.472957 |
| similar to Chromosome 2 open reading frame 3                  |          |          | 0.698432 |
| TOX high mobility group box family member 3                   | 3.765452 | 1.647679 | 1.579909 |
| target of EGR1, member 1 (nuclear)                            | 0.783722 | 0.80337  | 1.471765 |
| anaphase promoting complex subunit 2                          | 0.424976 | 0.875053 | 0.447555 |
| plexin A2                                                     | 1.05798  | 0.834734 | 3.426852 |
| Malate dehydrogenase 2, NAD (mitochondrial)                   | 0.788041 | 0.707446 | 0.291428 |
| AT rich interactive domain 1A (SWI-like)                      | 2.327885 | 1.432004 | 1.522655 |
| coiled-coil domain containing 112                             | 0.719622 | 1.608045 | 3.593658 |
| mitochondrial ribosomal protein L35                           | 0.895657 | 1.106128 | 0.950191 |
| Fas (TNFRSF6) associated factor 1                             | 1.83719  | 0.978166 | 0.70097  |
| phosphatidylinositol glycan anchor biosynthesis, class S      | 0.927353 | 1.093933 | 2.191981 |
| similar to zinc finger RNA binding protein                    | 2.656919 |          | 0.608851 |
| chromosome 20 open reading frame 7                            | 1.323096 | 0.94695  | 0.432947 |
| snail homolog 2 (Drosophila)                                  | 1.711763 | 1.25592  | 2.425142 |
| ring finger protein 207                                       | 2.132008 |          | 3.143831 |
| mediator of RNA polymerase II transcription, subunit 31 hor   | 1.197297 | 0.875357 | 0.324494 |
| trefoil factor 2                                              | 1.042537 | 1.135465 | 2.426958 |
| hypothetical protein LOC769949                                |          | 0.266662 |          |
| coiled-coil domain containing 60                              | 3.014278 |          |          |
| Coagulation factor XIII, A1 polypeptide                       | 0.947832 | 1.503367 | 10.37932 |
| chromosome 10 open reading frame 63                           | 0.584646 | 0.949758 | 3.400589 |
| chromosome 10 open reading frame 63                           | 0.91851  | 3.528046 | 1.27222  |
| Zinc finger, DHHC-type containing 3                           | 1.044215 | 1.328717 | 1.419172 |
| chitinase, acidic /// similar to CBPch04                      | 11.99135 |          | 0.756885 |
| KIAA0430                                                      |          | 19.83793 |          |
| dedicator of cytokinesis 9                                    | 1.330251 | 0.923027 | 0.217743 |
| fibrillin 2                                                   |          |          | 0.311979 |
| coiled-coil domain containing 84                              | 1.315009 | 0.480996 | 0.323948 |
| ring finger protein 19A                                       |          | 1.393012 |          |
| delta/notch-like EGF repeat containing                        |          |          |          |
| ST3 beta-galactoside alpha-2,3-sialyltransferase 5            | 0.792541 | 0.631369 | 0.019252 |
| tec protein tyrosine kinase                                   | 1.925379 | 0.580715 | 0.370992 |
| thrombomucin                                                  | 1.964773 | 1.284614 | 2.216014 |
| Exocyst complex component 3-like                              | 1.060258 | 1.506348 | 1.354346 |
| Similar to nitric oxide synthase 1 (neuronal) adaptor protein | 0.951938 | 1.254443 | 3.048297 |

|                                                                     |          |          |          |
|---------------------------------------------------------------------|----------|----------|----------|
| proprotein convertase subtilisin/kexin type 6                       | 1.455922 | 1.318062 | 2.80515  |
| LATS, large tumor suppressor, homolog 1 (Drosophila)                | 0.912375 | 1.086928 | 0.711199 |
| chromosome 20 open reading frame 11                                 | 0.829541 | 0.71058  | 0.591962 |
| paralemmin 2                                                        | 0.994744 | 1.290799 | 2.513742 |
| 4-aminobutyrate aminotransferase                                    | 0.781119 | 1.036374 | 1.136334 |
| ninjurin 2                                                          | 2.287693 | 0.531934 | 1.106555 |
| signal-induced proliferation-associated 1 like 2                    | 1.138613 |          | 4.475415 |
| unc-119 homolog B (C. elegans)                                      | 1.078952 | 1.122279 | 0.216988 |
| mannosidase, alpha, class 1A, member 1                              | 0.447591 | 0.914724 | 0.551589 |
| BCL2/adenovirus E1B 19kDa interacting protein 3                     | 0.363362 | 1.084907 | 0.171553 |
| topoisomerase (DNA) II alpha 170kDa                                 | 1.078949 | 1.058107 | 0.435321 |
| integrin, beta 1 (fibronectin receptor, beta polypeptide, antigen)  | 1.850876 | 1.975765 | 5.611638 |
| musashi homolog 1 (Drosophila)                                      |          |          | 2.386063 |
| deoxynucleotidyltransferase, terminal, interacting protein 2        | 0.439373 | 0.569341 | 0.057704 |
| pleckstrin homology domain containing, family M (with RUF1)         | 1.68279  | 1.123377 | 2.173593 |
| chromosome 13 open reading frame 34                                 | 1.015541 | 1.254811 | 0.437024 |
| cell division cycle associated 2                                    |          | 1.247295 | 0.236915 |
| mab-21-like 2 (C. elegans)                                          |          |          | 6.246142 |
| heme oxygenase (decycling) 1                                        | 1.679744 | 1.35757  | 4.09     |
| tropomodulin 4 (muscle)                                             | 0.991436 | 1.251187 | 2.861436 |
| Endoplasmic reticulum-golgi intermediate compartment (ER) protein 1 | 1.022466 | 1.001055 | 1.175609 |
| pyruvate dehydrogenase (lipoamide) alpha 1                          | 1.61044  | 0.898792 | 0.297608 |
| chromosome 1 open reading frame 83                                  | 0.652562 | 0.784472 | 0.321388 |
| chromosome 1 open reading frame 83                                  | 0.809599 | 0.960042 | 0.289605 |
| glutaminase                                                         | 2.468722 | 0.79645  | 0.510431 |
| glutaminase                                                         | 1.442418 | 0.886808 | 0.476164 |
| GATA binding protein 6                                              | 1.869361 | 1.200601 | 9.57096  |
| v-ets erythroblastosis virus E26 oncogene                           | 2.218742 | 1.757985 | 1.46521  |
| v-ets erythroblastosis virus E26 oncogene                           | 1.093134 | 1.851706 | 2.258922 |
| kinesin heavy chain member 2A                                       | 0.696131 | 1.324123 | 3.20175  |
| inhibitor of DNA binding 4, dominant negative helix-loop-helix      | 1.469613 | 0.676197 | 0.469833 |
| GATA binding protein 5                                              | 1.156287 | 1.634898 | 1.670464 |
| thioredoxin-like 1                                                  | 0.4504   | 1.34787  | 1.542838 |
| ubiquitin specific peptidase 25                                     | 2.088339 | 1.329888 | 0.481609 |
| casein kinase 1, epsilon                                            | 0.844898 | 0.784584 | 0.313549 |
| casein kinase 1, epsilon                                            | 1.430296 | 0.52109  | 0.397668 |
| DNA2 DNA replication helicase 2-like (yeast)                        | 1.300029 | 2.036099 | 0.778465 |
| myosin phosphatase Rho interacting protein                          | 2.162187 | 0.531683 | 1.302205 |
| WD repeat domain 5                                                  | 0.873755 | 1.096057 | 0.734409 |
| hypothetical LOC426015                                              | 0.648494 | 1.142164 | 2.439854 |

|                                                               |          |          |          |
|---------------------------------------------------------------|----------|----------|----------|
| hypothetical LOC426015 /// hypothetical protein LOC76844      | 0.652819 | 0.870459 | 2.071008 |
| neurexin 1                                                    | 1.295564 | 1.815363 | 3.362807 |
| suppression of tumorigenicity 14 (colon carcinoma)            | 1.248599 | 1.342074 | 2.26983  |
| hypothetical protein LOC768920                                | 0.780012 | 0.860071 | 0.505025 |
| microtubule-associated protein 1B                             |          |          |          |
| similar to GTP-binding protein SB128                          | 1.605069 | 1.059006 | 2.380203 |
| adenosine deaminase, RNA-specific, B1 (RED1 homolog rat       | 1.330327 | 0.82655  | 0.463102 |
| chromosome 5 open reading frame 21                            | 1.622533 | 1.132749 | 0.417163 |
| heat shock transcription factor 2                             | 1.261518 | 1.516319 | 0.266797 |
| solute carrier family 31 (copper transporters), member 1      | 0.787799 | 0.601144 | 2.078568 |
| KS5 protein                                                   | 1.044651 | 0.843537 | 2.96073  |
| Slit homolog 1 (Drosophila)                                   | 0.443684 |          |          |
| mitogen-activated protein kinase 1                            | 1.181507 | 0.41049  | 0.578461 |
| guanine nucleotide binding protein (G protein), alpha inhibit | 1.039159 | 0.882425 | 0.435171 |
| MHC class II antigen B-F minor heavy chain                    | 291.5095 | 3.516264 | 0.032792 |
| fer-1-like 3, myoferlin (C. elegans)                          | 3.005156 | 1.176118 | 2.324343 |
| protein phosphatase 1, regulatory (inhibitor) subunit 12B     | 0.458222 | 1.732789 | 1.126359 |
| DOT1-like, histone H3 methyltransferase (S. cerevisiae)       | 0.603489 | 1.090834 | 2.406644 |
| twist homolog 2 (Drosophila)                                  | 1.916296 | 1.957323 | 3.281041 |
| Growth hormone regulated TBC protein 1                        | 0.51109  | 1.361467 | 0.126295 |
| chromosome 5 open reading frame 13                            | 0.673331 | 1.095124 | 0.673354 |
| GPN-loop GTPase 2                                             | 0.92601  | 0.908024 | 1.641004 |
| suppressor of cytokine signaling 2                            | 1.8109   | 1.316001 | 1.850915 |
| cysteine-rich, angiogenic inducer, 61                         | 3.441224 | 1.773256 | 1.581363 |
| FK506 binding protein 1B, 12.6 kDa                            | 0.601676 | 0.927576 | 2.198998 |
| interleukin 6 signal transducer (gp130, oncostatin M receptor | 2.185428 | 1.266791 | 1.172481 |
| similar to alpha2,3-sialyltransferase                         | 0.620685 | 0.809582 | 2.858311 |
| zona pellucida glycoprotein 1 (sperm receptor)                | 3.709076 |          | 9.463066 |
| frequenin homolog (Drosophila)                                | 1.284148 | 0.564946 | 1.595566 |
| HIR histone cell cycle regulation defective homolog A (S. ce  | 0.865149 | 0.911776 | 0.541184 |
| transmembrane protein 163                                     | 2.05933  | 0.575698 |          |
| coagulation factor XIII, A1 polypeptide                       |          |          | 3.2262   |
| coagulation factor XIII, A1 polypeptide                       |          |          |          |
| steroidogenic acute regulator                                 |          | 0.238611 |          |
| KIAA1529 /// similar to RP11-23J9.1                           |          | 39.18995 |          |
| delta-like 1 (Drosophila)                                     | 3.339141 |          | 1.466343 |
| histidine triad nucleotide binding protein 1                  | 0.48173  | 1.152426 | 2.205078 |
| Cell division cycle 37 homolog (S. cerevisiae)                | 0.474363 | 0.750063 | 0.490076 |
| cone-type transducin alpha subunit                            |          | 0.567439 | 1.007614 |
| adenomatosis polyposis coli down-regulated 1                  | 1.11689  | 2.145867 | 1.67764  |

|                                                                     |          |          |          |
|---------------------------------------------------------------------|----------|----------|----------|
| nuclear VCP-like                                                    | 5.294993 |          |          |
| RAD51 homolog (RecA homolog, E. coli) (S. cerevisiae)               | 0.693498 | 1.100329 | 0.543146 |
| chemokine (C-X-C motif) receptor 4                                  | 0.933392 | 0.80233  | 0.194278 |
| SET domain containing 3                                             | 2.330379 | 0.443231 |          |
| DnaJ (Hsp40) homolog, subfamily C, member 9                         | 0.862939 | 1.032619 | 0.683208 |
| DnaJ (Hsp40) homolog, subfamily C, member 9                         | 0.435899 | 1.115596 | 0.770445 |
| transmembrane and coiled-coil domains 1                             | 0.254236 | 0.756299 | 4.679155 |
| centromere protein C 1                                              | 1.132413 | 1.058833 | 0.538588 |
| leucine aminopeptidase 3                                            | 2.256764 | 1.196802 | 0.961369 |
| nucleoporin like 1                                                  | 0.977821 | 1.014007 | 0.44088  |
| eyes absent homolog 1 (Drosophila)                                  | 1.959687 | 1.074707 |          |
| similar to conserved hypothetical protein                           | 1.414623 | 1.906346 | 2.736948 |
| Sp3 transcription factor                                            | 0.966193 | 0.881197 | 0.550938 |
| TP53 regulated inhibitor of apoptosis 1                             | 1.00626  | 1.000046 | 0.589833 |
| LIM homeobox 9                                                      | 0.198121 |          |          |
| LIM homeobox 9                                                      | 2.060383 |          |          |
| disabled homolog 1 (Drosophila)                                     | 2.136399 | 0.801248 | 0.781597 |
| synaptobrevin-like 1                                                | 0.710952 | 0.9055   | 0.885223 |
| Synaptobrevin-like 1                                                |          |          |          |
| resistance to inhibitors of cholinesterase 3 homolog (C. elegans)   | 0.616508 |          | 0.244755 |
| resistance to inhibitors of cholinesterase 3 homolog (C. elegans)   | 1.243551 | 1.275786 | 0.452466 |
| Smith-Magenis syndrome chromosome region, candidate 8               | 0.961019 | 0.805442 | 1.345829 |
| similar to M-phase phosphoprotein 1                                 | 0.728847 | 1.301236 | 0.777588 |
| similar to M-phase phosphoprotein 1                                 | 0.830475 | 0.767819 | 0.857993 |
| cyclin E1 /// similar to cyclin E                                   | 1.543645 | 1.921463 | 0.953707 |
| similar to KIAA0614 protein                                         | 2.061068 | 1.713095 | 1.908001 |
| leucine rich repeat containing 17                                   | 2.40051  | 3.217743 | 3.10076  |
| similar to Putative ubiquitin-conjugating enzyme E2 D3-like         | 0.862286 | 0.946729 | 0.451604 |
| similar to Putative ubiquitin-conjugating enzyme E2 D3-like         | 16.68352 | 1.843322 | 0.414127 |
| zinc finger protein, X-linked                                       | 0.860307 | 1.010994 | 0.275361 |
| cryptochrome 2 (photolyase-like)                                    | 0.714145 | 0.71592  | 0.059008 |
| cryptochrome 2 (photolyase-like)                                    | 1.265312 | 0.733393 | 0.512568 |
| cryptochrome 2 (photolyase-like)                                    | 1.329228 | 0.752784 | 0.557431 |
| dpy-19-like 1 (C. elegans)                                          |          |          |          |
| WD repeat domain 1                                                  | 1.029914 | 1.317727 | 0.535551 |
| similar to early response to neural induction ERNI                  |          | 1.02237  | 0.391253 |
| UDP-Gal:betaGlcNAc beta 1,4- galactosyltransferase, polypeptide     | 1.064188 | 1.238905 | 2.875949 |
| Tetratricopeptide repeat, ankyrin repeat and coiled-coil containing | 4.110894 | 1.027589 | 0.707524 |
| neurotrimin                                                         | 1.010342 | 1.005698 | 2.421729 |
| chromosome 1 open reading frame 115                                 | 0.77911  | 0.825176 | 1.4063   |



|                                                                  |          |          |          |
|------------------------------------------------------------------|----------|----------|----------|
| glutathione S-transferase theta 1                                | 0.76841  | 0.714248 | 0.082646 |
| glutathione S-transferase theta 1                                | 0.592636 | 0.750355 | 0.141111 |
| MOB1, Mps One Binder kinase activator-like 1A (yeast)            | 1.442965 | 1.020993 |          |
| RAN binding protein 9                                            | 1.215127 | 0.881966 | 0.38592  |
| fibroblast growth factor 18                                      |          | 0.368059 | 2.797958 |
| Hypothetical LOC421802                                           | 0.451149 | 0.526578 |          |
| interferon-related developmental regulator 1                     | 1.042056 | 1.079076 | 0.696812 |
| tyrosine kinase with immunoglobulin-like and EGF-like dom        | 7.540117 | 0.871855 | 2.825521 |
| glutamate-ammonia ligase (glutamine synthetase)                  | 0.823584 | 0.956105 | 2.493061 |
| glutamate-ammonia ligase (glutamine synthetase)                  | 1.09839  | 1.18313  | 2.261168 |
| immunoglobulin J polypeptide, linker protein for immunogl        | 2.369604 | 1.557781 | 0.180305 |
| Solute carrier family 40 (iron-regulated transporter), member    | 0.79004  | 2.05465  | 0.902512 |
| proprotein convertase subtilisin/kexin type 5                    | 5.197226 |          |          |
| paraoxonase 2                                                    |          |          | 2.734103 |
| inhibitor of growth family, member 1                             | 1.243819 | 0.940942 | 0.615099 |
| primase, DNA, polypeptide 2 (58kDa)                              | 1.500531 | 1.964139 | 0.482021 |
| neurochondrin                                                    | 0.205938 | 1.284513 |          |
| xanthine dehydrogenase                                           | 1.259173 |          | 2.762937 |
| cysteine conjugate-beta lyase 2                                  | 1.005493 | 0.883303 | 2.685095 |
| ubiquitin B                                                      | 0.54743  | 1.266642 | 1.50724  |
| ubiquitin B                                                      | 0.584148 | 1.292028 | 1.382976 |
| similar to hypothetical protein FLJ38973                         | 0.726223 | 0.761541 | 0.488153 |
| purinergic receptor P2Y, G-protein coupled, 1                    | 1.451125 |          | 2.251043 |
| complement component 3                                           | 0.916921 | 0.997212 | 2.57155  |
| protein tyrosine phosphatase, receptor type, G                   | 0.924832 | 1.141977 | 0.338949 |
| CHK2 checkpoint homolog (S. pombe)                               | 0.960462 | 1.294657 | 0.639669 |
| heat shock factor binding protein 1                              | 0.690263 | 1.054245 | 0.41171  |
| forkhead box K1                                                  | 0.813379 | 0.39503  | 0.611499 |
| 3-hydroxy-3-methylglutaryl-Coenzyme A synthase 2 (mitochondrial) |          |          | 4.601584 |
| interleukin 1 receptor-like 1                                    | 1.608865 | 2.069449 | 4.038357 |
| interleukin 1 receptor-like 1                                    | 0.935653 | 2.123495 | 8.117787 |
| brain factor-2                                                   |          |          |          |
| lipoma HMGIC fusion partner-like 2 /// osteoblast membran        | 2.517398 | 1.229699 | 2.255386 |
| glutathione S-transferase alpha 3                                | 1.27537  | 1.794011 | 2.115105 |
| latent transforming growth factor beta binding protein 1         | 0.775202 | 1.835479 | 1.45346  |
| neuropilin 2                                                     | 1.1521   | 1.451014 |          |
| RALBP1 associated Eps domain containing 2                        | 0.850653 | 1.145967 | 0.345898 |
| Similar to MGC83953 protein                                      | 0.696796 | 0.82156  | 0.193713 |
| similar to LOC283951 protein                                     | 0.911379 | 1.836156 | 0.498398 |
| chemokine (C-C motif) ligand 4                                   | 82.85354 |          | 7.323856 |

|                                                                   |          |          |          |
|-------------------------------------------------------------------|----------|----------|----------|
| lactotransferrin                                                  | 2.413333 | 1.190915 | 0.866849 |
| lactotransferrin                                                  | 2.226141 | 1.444311 | 0.863581 |
| succinate-CoA ligase, GDP-forming, beta subunit                   | 1.682792 | 0.583006 | 0.949403 |
| collagen, type XIV, alpha 1 (undulin)                             | 0.777831 | 0.809527 | 0.543931 |
| Tumor protein D52-like 1                                          | 1.622065 |          | 3.839991 |
| UTP6, small subunit (SSU) processome component, homolo            | 1.194005 | 1.441442 | 0.448212 |
| lysosomal-associated membrane protein 2                           | 1.266496 | 2.252354 | 0.828265 |
| Nuclear receptor interacting protein 3                            | 1.973737 | 3.145179 | 3.320178 |
| major facilitator superfamily domain containing 10                | 0.88348  | 0.93558  | 2.373513 |
| similar to PLCG1 variant protein                                  | 0.758592 | 0.874109 | 1.641351 |
| coiled-coil domain containing 86                                  | 0.60939  | 1.388669 | 1.976451 |
| doublesex and mab-3 related transcription factor 1                | 0.72878  | 0.843954 | 1.570562 |
| v-maf musculoaponeurotic fibrosarcoma oncogene homolog            | 3.640804 | 1.622886 | 7.674698 |
| doublecortex                                                      | 0.650197 | 3.304656 | 0.355275 |
| three prime histone mRNA exonuclease 1                            | 1.051361 | 1.088303 | 2.104003 |
| keratin 19                                                        | 1.033809 | 1.15189  | 0.299475 |
| keratin 19                                                        | 0.435386 | 0.951768 | 0.213901 |
| keratin 19                                                        | 0.773187 | 3.1071   | 0.128669 |
| secreted protein, acidic, cysteine-rich (osteonectin)             | 1.185094 | 1.06365  | 0.416693 |
| tropomodulin 1                                                    | 0.47729  | 0.799    | 1.241924 |
| 4-aminobutyrate aminotransferase                                  |          |          |          |
| mucolipin 2                                                       | 2.52591  | 1.789679 | 2.063888 |
| cripto, FRL-1, cryptic family 1B                                  |          |          | 4.580862 |
| similar to peripheral clock protein 2                             | 0.957233 | 1.040286 | 2.365939 |
| transforming growth factor, beta receptor II (70/80kDa)           | 1.619095 | 1.070943 | 0.408851 |
| myotubularin related protein 2                                    | 0.963592 | 0.47275  | 1.104761 |
| homeobox B3                                                       | 2.907315 | 0.647538 | 1.237151 |
| macrophage receptor with collagenous structure                    | 2.917887 | 1.620523 | 0.822768 |
| hypothetical gene supported by CR354225                           | 0.846573 | 3.950516 |          |
| FK506 binding protein 9, 63 kDa                                   | 2.739212 | 1.483242 | 2.806661 |
| sulfotransferase family, cytosolic, 1C, member 3                  | 1.626838 | 1.29886  | 2.776973 |
| retinoic acid receptor, beta                                      | 1.522001 | 1.526583 | 2.149719 |
| methylenetetrahydrofolate dehydrogenase (NADP+ depende            | 1.384914 | 0.956298 | 0.215565 |
| family with sequence similarity 69, member B                      | 0.593038 | 1.36379  | 1.876765 |
| family with sequence similarity 69, member B                      |          | 2.168094 |          |
| fibulin 1                                                         | 1.778176 | 1.831455 | 5.140056 |
| aquaporin 1 (Colton blood group)                                  | 1.189872 | 1.466677 | 5.162772 |
| fibroblast growth factor 13                                       | 1.074103 | 21.027   | 3.134738 |
| runt-related transcription factor 1; translocated to, 1 (cyclin I | 1.771061 | 1.447092 | 2.141031 |
| frizzled homolog 6 (Drosophila)                                   | 2.587858 | 3.291985 | 0.455547 |

|                                                          |          |          |          |
|----------------------------------------------------------|----------|----------|----------|
| frizzled homolog 6 (Drosophila)                          | 10.30159 |          |          |
| La ribonucleoprotein domain family, member 4             | 1.249517 | 2.009763 | 1.71858  |
| lymphoid enhancer-binding factor 1                       | 0.653143 | 1.07825  | 0.115798 |
| lymphoid enhancer-binding factor 1                       | 0.857836 | 0.987736 | 0.1661   |
| RNA binding protein with multiple splicing 2             | 2.493628 | 1.11525  | 2.475775 |
| retina and anterior neural fold homeobox                 | 0.148075 | 1.199093 |          |
| nuclear receptor subfamily 6, group A, member 1          | 1.270319 | 1.693926 | 2.174767 |
| clock homolog (mouse)                                    | 1.816299 | 0.597752 | 0.488849 |
| calmegin                                                 | 1.242554 | 4.405936 | 0.800895 |
| bone morphogenetic protein 1                             | 2.431551 | 0.969158 | 0.523179 |
| bone morphogenetic protein 1                             | 1.133396 |          | 5.849726 |
| potassium voltage-gated channel, subfamily G, member 2   |          | 0.760245 | 2.79903  |
| F-box protein 5                                          | 1.462125 |          | 0.469029 |
| creatine kinase, brain                                   | 1.435054 | 1.480389 | 1.529247 |
| synuclein, alpha (non A4 component of amyloid precursor) | 1.390384 | 1.883743 | 1.091451 |
| transcription factor 7-like 2 (T-cell specific, HMG-box) | 1.463929 | 1.15698  | 0.578297 |
| cannabinoid receptor 1 (brain)                           | 2.04543  |          | 5.728003 |
| activated leukocyte cell adhesion molecule               | 1.021554 | 0.838104 | 0.491304 |
| integrator complex subunit 6                             |          | 0.809704 | 0.089508 |
| glutamate receptor, ionotropic, AMPA 4                   | 0.427953 | 1.243006 | 0.822374 |
| family with sequence similarity 96, member A             | 2.236385 | 0.234492 | 0.541317 |
| Rho GTPase activating protein 21                         | 1.930519 | 1.525496 | 2.634774 |
| COX11 homolog, cytochrome c oxidase assembly protein (y  | 3.291381 | 0.905429 | 0.858629 |
| zinc finger, CCHC domain containing 4                    | 0.47658  | 0.35073  | 1.218222 |
| microphthalmia-associated transcription factor           |          |          |          |
| Zwilch, kinetochore associated, homolog (Drosophila)     | 0.630862 | 1.231723 | 3.603106 |
| leucine-rich, glioma inactivated 1                       | 3.069115 | 1.433104 | 0.926185 |
| seven in absentia homolog 1 (Drosophila)                 | 0.485167 | 1.407251 | 0.739218 |
| adducin 3 (gamma)                                        | 1.657321 | 1.608286 | 2.774761 |
| early B-cell factor 1                                    | 2.197584 | 2.084862 | 2.944317 |
| DEAH (Asp-Glu-Ala-His) box polypeptide 30                | 1.109636 | 0.804794 | 0.679759 |
| splicing factor 3a, subunit 3, 60kDa                     | 0.743623 | 1.268239 | 0.382477 |
| solute carrier family 35, member F1                      | 1.289568 | 1.406315 | 2.141486 |
| interleukin 6 (interferon, beta 2)                       | 3.619404 |          | 46.51493 |
| v-src sarcoma viral oncogene                             | 2.067374 |          | 2.274828 |
| similar to Protein C18orf1                               | 0.561634 | 3.900918 | 2.748873 |
| similar to Protein C18orf1                               | 1.293891 | 2.421524 | 5.804923 |
| myosin IXA                                               | 2.565661 | 0.795472 | 2.302902 |
| transmembrane protein 192                                | 1.095764 | 1.002779 | 0.484116 |
| v-maf musculoaponeurotic fibrosarcoma oncogene homolog   | 0.974243 | 0.891115 | 1.57505  |

|                                                              |          |          |          |
|--------------------------------------------------------------|----------|----------|----------|
| chromosome 1 open reading frame 102                          | 0.918903 | 0.866062 | 0.798133 |
| v-maf musculoaponeurotic fibrosarcoma oncogene homolog       | 1.848327 | 0.885785 | 1.614651 |
| phosphofructokinase, muscle                                  | 1.187788 | 0.436452 | 2.603456 |
| phosphofructokinase, liver                                   | 0.877577 | 1.041297 | 2.168976 |
| aryl hydrocarbon receptor nuclear translocator-like 2        | 1.374443 | 0.861638 | 1.579729 |
| TIMP metalloproteinase inhibitor 3 (Sorsby fundus dystrophy  | 2.867467 | 1.845621 | 3.352392 |
| cholinergic receptor, nicotinic, alpha 9                     | 1.469286 | 0.3725   | 0.357894 |
| hypothetical protein LOC776660                               | 2.435552 | 1.490744 | 1.709908 |
| ubiquitin-conjugating enzyme E2N (UBC13 homolog, yeast)      | 0.868685 | 0.885612 | 0.365533 |
| similar to CASP gene product                                 | 0.818763 | 0.955371 | 0.468729 |
| cut-like homeobox 1 /// similar to CASP gene product         | 0.55865  | 0.689931 | 0.252282 |
| attachment region binding protein                            | 0.947057 | 0.384105 | 3.206524 |
| UDP-Gal:betaGlcNAc beta 1,4- galactosyltransferase, polyp    | 1.008208 | 1.185596 | 4.571989 |
| leucine rich repeat containing 8 family, member D            | 0.925917 | 0.979933 | 0.648935 |
| stathmin 1                                                   | 0.370442 | 1.132591 | 0.317107 |
| activin A receptor, type IIA                                 |          |          |          |
| hyaluronan binding protein 4                                 | 1.053899 | 1.103619 | 2.612181 |
| Phosphatase and tensin homolog                               | 1.031028 | 1.390096 | 0.4724   |
| solute carrier family 12 (sodium/chloride transporters), mem | 0.987146 | 0.456817 | 5.310114 |
| Transporter 2, ATP-binding cassette, sub-family B (MDR/T     | 1.683743 | 1.388565 | 3.689806 |
| vav 3 oncogene                                               | 1.196671 | 0.711722 | 0.358815 |
| vav 3 oncogene                                               | 1.066912 | 0.774264 | 0.612814 |
| DnaJ (Hsp40) homolog, subfamily C, member 18                 | 2.575387 | 0.596658 | 0.793793 |
| DnaJ (Hsp40) homolog, subfamily C, member 18                 | 3.071274 | 0.699591 | 0.831207 |
| DnaJ (Hsp40) homolog, subfamily C, member 18                 | 2.527498 | 1.130252 | 0.511367 |
| dihydrofolate reductase                                      | 0.327056 | 1.302426 | 2.128062 |
| fibrillin 1                                                  | 0.590442 | 0.972466 | 3.615338 |
| methyltransferase like 14                                    | 0.691136 | 0.954485 | 0.377787 |
| c-mer proto-oncogene tyrosine kinase                         | 1.668502 | 1.505839 | 4.743076 |
| carbonyl reductase 1                                         | 0.967041 | 1.011214 | 1.45039  |
| smoothelin                                                   |          | 2.59691  | 0.798196 |
| Rho GTPase activating protein 26                             |          | 1.163176 | 2.744898 |
| Rho GTPase activating protein 26                             | 0.504055 | 3.253635 |          |
| hemoglobin, alpha 2                                          | 0.480146 | 1.921648 | 5.434627 |
| hemoglobin, alpha 2                                          | 0.531891 | 1.671765 | 5.308849 |
| similar to chromosome 2 open reading frame 24                | 0.840427 | 0.90905  | 2.029083 |
| hemoglobin, alpha 1                                          | 0.587715 | 1.357911 | 4.477974 |
| hemoglobin, alpha 1                                          | 0.471881 | 1.539881 | 4.347862 |
| Glypican 4                                                   | 2.041791 | 0.744664 | 1.018833 |
| centromere protein F, 350/400ka (mitosin)                    | 1.175441 | 1.106449 | 0.858912 |

|                                                                |          |          |          |
|----------------------------------------------------------------|----------|----------|----------|
| Similar to stomatin related protein                            | 1.130723 | 1.10316  | 2.67258  |
| metal-regulatory transcription factor 1                        | 1.069158 | 0.744785 | 0.309758 |
| ribosome binding protein 1 homolog 180kDa (dog)                | 1.798158 | 1.208668 | 1.219651 |
| paired-like homeobox 2b                                        | 9.87342  |          |          |
| lysosomal-associated membrane protein 2                        | 0.403811 | 1.736651 | 0.658568 |
| claudin 3                                                      | 0.616332 | 0.747024 | 2.306872 |
| interleukin 22 receptor, alpha 1                               | 3.224229 | 3.241365 | 1.435847 |
| chemokine (C-C motif) ligand 1                                 | 2.010654 | 1.885237 | 3.122369 |
| caspase 6, apoptosis-related cysteine peptidase                | 1.509581 | 0.849378 | 0.423765 |
| chaperonin containing TCP1, subunit 6A (zeta 1)                | 1.739382 | 0.872099 | 0.729275 |
| TIMP metalloproteinase inhibitor 2                             | 0.858679 | 1.155226 | 1.448877 |
| chromosome 3 open reading frame 64                             | 0.07127  | 0.569674 | 1.655023 |
| Glycosyltransferase                                            | 2.078346 | 0.954314 | 0.30872  |
| protein tyrosine phosphatase, receptor-type, Z polypeptide 1   | 2.343234 | 1.225848 | 0.70653  |
| iroquois homeobox 2                                            | 1.330604 |          |          |
| odx, odd Oz/ten-m homolog 2 (Drosophila)                       | 1.003777 | 0.619065 | 2.864115 |
| retinoblastoma 1 (including osteosarcoma)                      | 1.022376 | 1.113594 | 0.714985 |
| chromosome 18 open reading frame 37                            | 0.484773 | 1.419429 | 1.402869 |
| aldehyde dehydrogenase 1 family, member A2                     | 1.601611 | 1.416561 | 1.492856 |
| aldehyde dehydrogenase 1 family, member A2                     | 5.558109 |          | 0.648949 |
| nischarin                                                      | 1.200824 | 0.827431 | 0.539101 |
| PRKR interacting protein 1 (IL11 inducible)                    | 1.075789 | 0.793962 | 0.610804 |
| SEC24 family, member B (S. cerevisiae)                         | 1.258069 | 0.724045 | 0.391205 |
| fibroblast growth factor 14                                    |          |          |          |
| ARP2 actin-related protein 2 homolog (yeast)                   | 0.834768 | 1.264786 | 1.936654 |
| cAMP responsive element binding protein 1                      | 4.702666 | 1.061562 | 1.047918 |
| Similar to Mediator of RNA polymerase II transcription subunit | 0.883405 | 0.975339 | 0.784842 |
| retinol saturase (all-trans-retinol 13,14-reductase)           | 0.785113 | 0.97235  | 2.140006 |
| similar to Small inducible cytokine A13 precursor (CCL13) (    | 11.73451 |          |          |
| chordin-like 1                                                 | 1.130213 | 2.334973 | 1.722335 |
| formin binding protein 1-like                                  | 1.628732 | 0.824116 | 0.417301 |
| EPH receptor A5                                                | 1.137063 | 1.49064  | 1.899939 |
| YTH domain family, member 1                                    | 1.300674 | 1.112561 | 0.70788  |
| EPH receptor B3                                                | 1.183494 |          |          |
| BARX homeobox 2                                                |          |          |          |
| hypothetical LOC423006                                         | 0.427771 | 1.299982 | 1.001353 |
| myosin binding protein C, slow type                            | 1.374063 | 0.753797 | 2.123067 |
| HCLS1 binding protein 3                                        | 1.797456 | 1.280808 | 3.21478  |
| galectin CG-16                                                 | 0.336295 | 0.794399 | 0.511667 |
| Galectin CG-16                                                 | 1.007054 | 0.992602 | 2.096253 |

|                                                                                  |          |          |          |
|----------------------------------------------------------------------------------|----------|----------|----------|
| ADAMTS-like 3                                                                    |          | 1.102122 | 13.27558 |
| similar to general transcription factor                                          | 8.546334 | 1.471567 | 3.627541 |
| golgi apparatus protein 1                                                        | 0.733711 | 0.973323 | 1.72431  |
| golgi apparatus protein 1                                                        | 0.616633 | 0.887605 | 1.347206 |
| phospholipase B domain containing 1                                              | 1.284474 | 1.106125 | 1.844216 |
| collagen, type IV, alpha 2                                                       | 1.184308 | 1.015152 | 2.35835  |
| Frizzled-8                                                                       | 2.001433 | 5.913417 | 2.704442 |
| collagen, type VI, alpha 1                                                       | 1.788846 | 1.660956 | 2.238648 |
| claudin 5                                                                        |          | 2.533384 | 1.759195 |
| neurocalcin delta                                                                | 1.667229 | 0.380319 | 0.117566 |
| diazepam binding inhibitor (GABA receptor modulator, acyl                        | 3.254142 | 0.197089 | 1.230238 |
| proline rich 11                                                                  | 0.830487 | 1.034453 | 0.738421 |
| inhibitor of DNA binding 2, dominant negative helix-loop-h                       | 1.095056 | 0.897194 | 0.341034 |
| CAP-GLY domain containing linker protein 1                                       | 0.749917 | 1.577115 | 1.752053 |
| syndecan 3                                                                       | 0.950673 | 1.088615 | 2.873306 |
| prostaglandin-D synthase                                                         | 2.466216 | 1.844215 | 1.018712 |
| thrombospondin, type I, domain containing 7A                                     |          | 0.458108 |          |
| cannabinoid receptor 1 (brain)                                                   | 0.330466 | 0.809123 |          |
| family with sequence similarity 122A                                             | 0.802146 | 1.122108 | 0.443331 |
| similar to Moesin (Membrane-organizing extension spike protein)                  |          | 3.293328 |          |
| cyclin B2                                                                        | 0.718587 | 1.168158 | 0.835277 |
| exocyst complex component 5                                                      | 0.406848 |          |          |
| keratin                                                                          | 0.711906 | 0.737221 | 0.449429 |
| MRE11 meiotic recombination 11 homolog A (S. cerevisiae)                         | 1.710588 | 0.563941 | 0.411712 |
| ORM1-like 3 (S. cerevisiae)                                                      |          | 0.822272 | 0.402585 |
| quaking homolog, KH domain RNA binding (mouse)                                   | 1.132904 | 0.857971 | 0.43176  |
| cell division cycle associated 3                                                 | 0.621968 | 1.054264 | 0.477165 |
| dachshund homolog 2 (Drosophila)                                                 | 0.767929 | 1.112252 | 0.495442 |
| potassium intermediate/small conductance calcium-activated channel, subfamily N, |          |          | 0.116277 |
| LFNG O-fucosylpeptide 3-beta-N-acetylglucosaminyltransfe                         | 1.627337 | 1.379977 | 3.066934 |
| mitochondrial ribosomal protein L21                                              |          | 0.45669  |          |
| homeobox D8                                                                      | 0.609528 |          | 8.297633 |
| ubiquitin specific peptidase 10                                                  | 0.966311 | 0.855667 | 1.06158  |
| Tumor necrosis factor, alpha-induced protein 1 (endothelial)                     | 0.549023 | 2.08712  | 2.300634 |
| structural maintenance of chromosomes 4                                          | 0.900351 | 0.983508 | 0.445407 |
| C-RF amide                                                                       | 1.643638 | 0.632375 |          |
| chromosome 7 open reading frame 23                                               | 1.931041 | 1.032758 | 1.605154 |
| inositol polyphosphate multikinase                                               | 1.158135 | 1.384542 | 2.793183 |
| Anillin, actin binding protein                                                   | 0.756699 | 1.074437 | 0.304756 |
| anillin, actin binding protein                                                   | 0.114699 |          |          |

|                                                                          |          |          |          |
|--------------------------------------------------------------------------|----------|----------|----------|
| X-ray repair complementing defective repair in Chinese ham               | 1.069045 | 1.200015 | 0.992513 |
| required for meiotic nuclear division 1 homolog (S. cerevisia            | 1.3951   | 0.655644 | 0.457983 |
| mannosidase, alpha, class 1B, member 1                                   | 1.581527 | 0.85939  | 0.428808 |
| c-fos induced growth factor (vascular endothelial growth fac             | 1.677466 | 2.059323 | 5.195278 |
| sprouty homolog 1, antagonist of FGF signaling (Drosophila               | 0.75787  | 0.491343 | 0.640463 |
| HemK methyltransferase family member 1                                   | 0.999494 | 1.220804 | 0.783458 |
| myosin, heavy chain 11, smooth muscle                                    | 1.538989 | 1.00877  | 4.458451 |
| NADH dehydrogenase (ubiquinone) Fe-S protein 4, 18kDa (                  | 0.331912 | 0.530579 | 1.111572 |
| PHD finger protein 11                                                    | 3.299323 | 1.144717 | 1.983491 |
| neuronal growth regulator 1                                              | 1.302885 | 1.031516 | 2.895689 |
| similar to Breast carcinoma amplified sequence 1 (Novel am               | 7.440256 |          |          |
| v-abl Abelson murine leukemia viral oncogene homolog 2 (a                | 0.314701 | 0.968089 |          |
| visinin-like 1                                                           | 1.238583 |          | 0.029577 |
| lecithin-cholesterol acyltransferase                                     | 2.078016 | 2.137977 | 10.80032 |
| angiopoietin 2                                                           | 2.374574 | 1.720765 | 1.829934 |
| hypothetical LOC425605                                                   | 0.503175 | 1.367474 | 2.185424 |
| similar to MGC80370 protein                                              |          | 3.497344 | 1.913483 |
| MHC B-G antigen                                                          | 1.080911 | 0.696556 | 0.697069 |
| MHC B-G antigen                                                          | 5.606188 |          |          |
| cerebellin 1 precursor                                                   | 1.189853 | 1.140943 | 1.254747 |
| Mitochondrial ribosomal protein S16                                      | 0.967149 | 1.109711 | 0.254877 |
| hyaluronan synthase 2                                                    | 3.758232 | 1.676101 | 1.205537 |
| ATPase, Na <sup>+</sup> /K <sup>+</sup> transporting, beta 1 polypeptide | 1.345253 | 1.426018 | 1.862079 |
| hypothetical LOC425172 /// tRNA 5-methylaminomethyl-2-                   | 1.498075 | 0.618136 | 0.562528 |
| endothelin receptor type B                                               | 1.182092 | 1.032051 | 2.889225 |
| ankyrin repeat domain 38                                                 | 4.568518 | 0.792857 | 2.755526 |
| cytochrome P450, family 26, subfamily A, polypeptide 1                   | 1.697711 | 0.581587 | 0.037541 |
| mitochondrial ribosomal protein L17                                      | 0.395974 | 1.171279 | 1.772798 |
| mitochondrial ribosomal protein L17                                      | 0.327294 | 1.000777 | 1.529609 |
| mitochondrial ribosomal protein L17                                      | 0.40899  | 1.057628 | 1.556768 |
| hematopoietically expressed homeobox                                     | 1.262886 | 1.172605 | 1.874177 |
| nuclear receptor coactivator 1                                           | 1.373789 | 0.833674 | 2.365558 |
| fatty acid binding protein 5                                             | 1.190769 | 0.916251 | 2.668652 |
| chromosome 18 open reading frame 21                                      | 1.640421 | 1.26988  | 0.391262 |
| spondin 1, extracellular matrix protein                                  | 8.473291 | 1.663639 | 1.306609 |
| matrix-remodelling associated 8                                          | 2.439311 | 2.099623 | 2.465011 |
| mucin 5B, oligomeric mucus/gel-forming                                   | 1.191861 | 2.220426 |          |
| capping protein (actin filament) muscle Z-line, alpha 2                  | 1.536225 | 1.011044 | 0.936945 |
| arylsulfatase family, member H                                           | 2.286081 | 1.549821 | 1.299164 |
| podocalyxin-like                                                         | 1.936293 | 1.029361 | 3.080452 |

|                                                                |          |          |          |
|----------------------------------------------------------------|----------|----------|----------|
| ATPase, Ca <sup>++</sup> transporting, plasma membrane 1       | 1.732199 | 1.022497 | 0.68094  |
| protocadherin 9                                                | 2.911247 |          | 45.7665  |
| complement component 4 binding protein, alpha                  | 1.08866  | 0.913083 | 0.724662 |
| lysozyme G-like 2                                              | 3.486435 |          | 3.133091 |
| Similar to MGC81154 protein                                    | 0.599669 | 1.046096 | 1.881224 |
| interferon regulatory factor 2                                 | 1.037782 | 0.837072 | 0.490052 |
| tumor necrosis factor receptor superfamily, member 1A          | 1.667186 | 1.099755 | 2.031239 |
| popeye domain containing 3                                     | 0.87801  | 0.772626 | 0.416828 |
| popeye domain containing 3                                     | 0.804508 | 0.367923 | 0.673515 |
| popeye domain containing 3                                     | 1.187071 | 0.800157 | 0.632746 |
| SH3-domain kinase binding protein 1                            | 0.949856 | 1.875325 | 0.400756 |
| SH3-domain kinase binding protein 1                            | 12.03348 |          |          |
| SH3-domain kinase binding protein 1                            | 0.893869 | 0.783824 | 0.320542 |
| T cell receptor alpha locus                                    | 0.656161 | 1.105889 | 0.338924 |
| lipopolysaccharide-induced TNF factor                          | 1.517638 | 2.790421 | 9.931461 |
| lipopolysaccharide-induced TNF factor                          | 1.47572  | 2.259956 | 3.802655 |
| adrenergic, alpha-1B-, receptor                                | 0.684882 | 2.045896 |          |
| solute carrier family 34 (sodium phosphate), member 1          | 1.544036 | 1.154177 | 2.247447 |
| paired-like homeodomain 2                                      | 2.520153 | 0.483826 | 1.400022 |
| FCH and double SH3 domains 2                                   | 0.976859 | 0.921842 | 0.450012 |
| calcium channel, voltage-dependent, gamma subunit 4            |          | 3.665758 | 2.643293 |
| olfactomedin 1                                                 | 1.017882 | 3.551179 |          |
| Growth differentiation factor 5                                |          | 2.412833 |          |
| EPH receptor B2                                                | 0.818471 | 1.448828 | 1.834512 |
| cholinergic receptor, nicotinic, beta 4                        |          | 2.377781 | 2.397416 |
| mitogen-activated protein kinase 6                             | 5.38117  |          | 1.04364  |
| Cbp/p300-interacting transactivator, with Glu/Asp-rich carboxy | 1.662742 | 1.502624 | 4.081304 |
| HESX homeobox 1                                                |          | 0.93268  | 2.524873 |
| neurexin 3                                                     | 1.018801 | 1.187852 | 2.197221 |
| zinc finger protein 609                                        | 9.279846 | 0.14608  | 0.836581 |
| sterol carrier protein 2                                       | 1.354736 | 1.139334 | 0.517883 |
| ELAV (embryonic lethal, abnormal vision, Drosophila)-like      | 2.573113 | 0.477971 | 2.67754  |
| PDZ and LIM domain 3                                           | 0.293728 | 0.558648 | 0.250955 |
| PDZ and LIM domain 3                                           | 0.384331 | 0.704071 | 0.458603 |
| transmembrane protein 167                                      | 0.582391 | 1.096891 | 0.544983 |
| transmembrane protein 167                                      | 0.22141  |          |          |
| frizzled homolog 9 (Drosophila)                                | 1.285264 | 1.274311 | 1.320034 |
| phospholipase C, delta 1                                       | 2.508857 | 2.505011 | 0.722469 |
| collagen, type IX, alpha 3                                     | 19.93803 |          |          |
| collagen, type IX, alpha 3                                     | 4.762602 | 0.44007  | 4.770791 |



|                                                                |          |          |          |
|----------------------------------------------------------------|----------|----------|----------|
| ets variant gene 6 (TEL oncogene)                              | 1.170614 | 1.150881 | 2.500015 |
| fibroblast growth factor receptor 2                            | 1.582902 | 1.436074 | 4.699017 |
| fibroblast growth factor receptor 2                            | 1.811013 | 1.131411 | 3.053947 |
| Rho-associated, coiled-coil containing protein kinase 2        | 0.683823 | 1.53871  | 1.75626  |
| regulator of G-protein signaling 20                            | 0.855868 | 1.307886 | 0.253367 |
| mitochondrial ribosomal protein L27                            | 0.892625 | 1.174653 | 0.778444 |
| myosin VA (heavy chain 12, myoxin)                             | 2.093092 | 0.874967 | 0.562272 |
| similar to myosin VA (heavy polypeptide 12, myoxin) /// sin    | 2.121912 | 0.814256 | 0.396814 |
| secreted phosphoprotein 1 (osteopontin, bone sialoprotein I, s | 1.608139 | 0.615076 | 0.934598 |
| solute carrier family 16, member 3 (monocarboxylic acid tra    | 1.20651  |          | 1.002164 |
| CD44 molecule (Indian blood group)                             | 1.739684 | 0.568252 | 0.252589 |
| CD44 molecule (Indian blood group)                             | 1.041954 | 1.179708 | 0.45999  |
| dickkopf homolog 3 (Xenopus laevis)                            | 0.874442 | 2.023534 | 2.71742  |
| similar to Gag-Pol polyprotein                                 | 0.586796 | 1.00436  | 0.165217 |
| T-cell receptor V alpha                                        | 0.621523 | 1.427991 | 0.175918 |
| insulin receptor                                               |          | 0.331488 |          |
| K(lysine) acetyltransferase 2A                                 | 1.366785 | 0.83435  | 2.030252 |
| eukaryotic translation initiation factor 4E                    | 1.002565 | 0.900759 | 0.437356 |
| Sec23 homolog A (S. cerevisiae)                                | 1.352374 | 0.89986  | 0.445392 |
| Sec23 homolog A (S. cerevisiae)                                | 1.594924 | 0.801797 | 0.430956 |
| Sec23 homolog A (S. cerevisiae)                                | 0.694135 | 2.248413 | 0.217101 |
| Sec23 homolog A (S. cerevisiae)                                | 0.506522 | 0.930787 | 0.398378 |
| Sec23 homolog A (S. cerevisiae)                                | 0.935633 | 1.197364 | 0.259177 |
| hypothetical LOC426458 /// hypothetical protein LOC77085       | 0.426536 | 0.742762 | 0.641452 |
| E2F transcription factor 4, p107/p130-binding                  | 0.747459 | 0.98743  | 2.005825 |
| folliculin                                                     |          | 0.401806 | 4.035666 |
| folliculin                                                     | 0.798051 | 0.395195 |          |
| hypothetical LOC415913                                         | 0.677826 | 1.071594 | 0.24537  |
| crystallin, zeta (quinone reductase)                           |          | 1.974052 | 10.10022 |
| cortactin                                                      | 2.279575 | 1.175518 | 0.653661 |
| kinectin 1 (kinesin receptor)                                  | 0.474973 | 1.203154 | 1.491742 |
| C-type lectin domain family 3, member B                        | 1.766189 | 2.027471 | 1.036807 |
| nuclear factor (erythroid-derived 2)-like 2                    | 1.642987 | 1.278397 | 1.815333 |
| nuclear factor (erythroid-derived 2)-like 2                    | 1.213014 | 1.320143 | 3.029044 |
| Cadherin 20, type 2                                            | 1.0088   | 1.554542 | 1.43426  |
| T cell receptor alpha locus                                    | 1.386206 | 0.289733 | 0.28656  |
| glutamine rich protein                                         | 0.670772 | 0.898226 | 1.687142 |
| Trinucleotide repeat containing 15                             | 2.673298 |          | 0.111864 |
| Rous sarcoma virus transcription enhancer factor II            | 0.699472 | 1.06472  | 2.035865 |
| ST3 beta-galactoside alpha-2,3-sialyltransferase 1             | 1.327486 | 1.177074 | 3.534508 |

|                                                               |          |          |          |
|---------------------------------------------------------------|----------|----------|----------|
| calpain 2, (m/II) large subunit                               | 1.788386 | 2.07343  | 2.774243 |
| TATA box binding protein (TBP)-associated factor, RNA pc      | 0.609095 | 0.913541 | 0.341819 |
| myosin, heavy chain 1, skeletal muscle, adult /// myosin, hea | 1.465602 | 1.011775 | 0.524806 |
| fatty acid binding protein 1, liver                           | 0.905424 | 2.342217 | 15.0514  |
| histone deacetylase 4                                         | 1.306755 | 1.230466 | 2.15569  |
| Zinc finger protein 207                                       | 1.273643 | 0.791706 | 1.360336 |
| zinc finger protein 207                                       | 1.010945 | 0.885658 | 0.88295  |
| MHC B-G antigen /// hypothetical LOC425214 /// similar to     | 1.561027 | 1.514457 | 2.101648 |
| Similar to ATP-binding cassette, sub-family C, member 9 isc   | 0.841322 | 0.943101 | 0.494651 |
| hypothetical LOC416899                                        |          | 2.928216 |          |
| centromere protein F, 350/400ka (mitosin)                     | 0.725012 | 1.007399 | 0.381014 |
| muscleblind-like 2 (Drosophila)                               | 1.855334 | 1.162553 | 2.280797 |
| calcium/calmodulin-dependent protein kinase kinase 2, beta    | 2.945828 | 1.06519  | 1.211429 |
| B-cell linker                                                 | 5.881552 | 1.205445 | 0.583431 |
| integrator complex subunit 6                                  | 0.809736 | 0.425054 | 0.325768 |
| thyroid hormone receptor interactor 13                        | 0.972449 | 1.232274 | 0.801412 |
| carboxypeptidase Z                                            | 0.984183 | 0.961031 |          |
| T cell receptor alpha locus                                   | 0.944947 | 3.484862 | 0.17052  |
| RYK receptor-like tyrosine kinase                             | 1.021822 | 1.310377 | 0.822226 |
| hairy and enhancer of split 1, (Drosophila)                   |          | 0.095288 |          |
| potassium channel, subfamily T, member 1                      | 1.3287   | 1.130473 | 3.350942 |
| RCD1 required for cell differentiation1 homolog (S. pombe)    | 0.902336 | 0.958317 | 0.43411  |
| interleukin 17 receptor D                                     | 1.235851 | 1.088526 | 0.235903 |
| sterol carrier protein 2                                      | 1.084834 | 1.273968 | 2.021867 |
| angiotensin I converting enzyme (peptidyl-dipeptidase A) 1    | 0.687023 | 1.975312 | 2.458406 |
| target of myb1 (chicken)                                      | 0.873499 | 1.527231 | 4.272393 |
| aldehyde dehydrogenase 1 family, member A3                    | 0.916719 | 1.884792 | 3.845217 |
| BCL2-related ovarian killer                                   | 0.764189 | 1.225307 | 1.038951 |
| tenascin C                                                    | 2.619977 | 1.173297 | 0.914815 |
| nuclear autoantigenic sperm protein (histone-binding)         | 0.566178 | 1.198336 | 0.372458 |
| period homolog 2 (Drosophila)                                 | 0.906235 | 0.426942 | 0.663466 |
| period homolog 2 (Drosophila)                                 |          |          | 4.827294 |
| Period homolog 2 (Drosophila)                                 | 0.701093 | 1.326725 | 5.638754 |
| embigin homolog (mouse)                                       | 0.455852 | 1.230886 | 0.408237 |
| protein phosphatase 3 (formerly 2B), regulatory subunit B, a  | 1.167108 | 1.128748 | 0.362541 |
| Pleckstrin homology domain containing, family A (phosphoi     | 1.554864 | 1.465919 | 2.623678 |
| frizzled homolog 3 (Drosophila)                               | 0.494066 | 1.044248 | 0.39104  |
| 17-beta-hydroxysteroid dehydrogenase                          |          |          | 1.835699 |
| deoxythymidylate kinase (thymidylate kinase)                  | 0.776397 | 1.031501 | 0.693902 |
| ras homolog gene family, member B                             | 1.718173 | 1.643899 | 2.61076  |

|                                                          |          |          |          |
|----------------------------------------------------------|----------|----------|----------|
| zinc finger protein 622                                  | 0.846631 | 0.986583 | 1.091355 |
| cathepsin B                                              | 2.037703 | 1.383431 | 3.811512 |
| peroxisome proliferator-activated receptor gamma         | 2.41938  | 0.920576 | 0.776053 |
| peroxisome proliferator-activated receptor gamma         |          |          | 4.010248 |
| regulator of G-protein signaling 17                      | 0.901318 | 1.240407 | 0.165521 |
| presenilin 1 (Alzheimer disease 3)                       | 3.108389 | 0.664146 | 0.750107 |
| Ras association (RalGDS/AF-6) domain family 8            | 1.235746 | 1.230062 | 2.936586 |
| Carbohydrate sulfotransferase 10                         | 1.104423 | 0.958267 | 0.885995 |
| general transcription factor IIH, polypeptide 1, 62kDa   | 1.952818 | 4.194649 | 0.275181 |
| v-akt murine thymoma viral oncogene homolog 1            | 1.216462 | 1.073662 | 0.316271 |
| deltex 3-like (Drosophila)                               | 2.251792 | 0.90276  | 2.08326  |
| platelet-derived growth factor alpha polypeptide         | 1.920424 | 1.174885 | 1.220717 |
| ADP-ribosyltransferase                                   | 1.083997 | 0.719464 | 0.41722  |
| cadherin 13, H-cadherin (heart)                          | 1.559026 | 1.371565 | 2.07307  |
| cadherin 13, H-cadherin (heart)                          | 3.960881 | 1.118563 | 1.65745  |
| Epidermal retinal dehydrogenase 2                        |          | 5.984656 |          |
| transgelin                                               | 1.309205 | 1.570406 | 3.115844 |
| interleukin 10 receptor, beta                            | 1.633849 | 1.342485 | 2.537236 |
| pleckstrin                                               | 1.464136 | 1.500168 | 0.458783 |
| pleckstrin                                               | 1.462806 | 0.73927  | 0.417604 |
| eukaryotic translation initiation factor 5B              | 1.474267 | 0.372306 | 1.716067 |
| hyaluronan and proteoglycan link protein 1               | 0.824373 | 0.79049  | 0.065298 |
| v-erb-a erythroblastic leukemia viral oncogene homolog 4 | 1.145458 | 1.325212 | 0.488448 |
| transmembrane and coiled-coil domains 3                  | 2.256096 | 0.838649 | 1.332661 |
| bone morphogenetic protein 2                             | 1.744006 | 3.583792 | 4.069346 |
| transcription factor Dp-1                                | 1.130366 | 1.248298 | 0.87641  |
| GC-rich promoter binding protein 1-like 1                | 0.837788 | 1.120186 | 0.449772 |
| enabled homolog (Drosophila)                             | 2.033372 | 0.648787 | 0.197046 |
| tachykinin receptor 1                                    |          |          |          |
| survival motor neuron                                    | 0.522743 | 1.151596 | 0.440875 |
| sema domain, immunoglobulin domain (Ig), short basic dom | 1.655779 | 1.483807 |          |
| sema domain, immunoglobulin domain (Ig), short basic dom | 0.480532 | 0.860233 | 0.895129 |
| twist homolog 1 (Drosophila)                             |          |          | 2.05778  |
| multiple inositol polyphosphate histidine phosphatase, 1 | 0.341222 | 1.71654  | 1.135904 |
| matrix metalloproteinase-13                              | 0.102004 | 0.465095 | 0.429503 |
| inhibin, beta A                                          | 2.454489 | 1.813505 | 3.286439 |
| carbonic anhydrase II                                    | 0.551772 | 2.446552 | 1.041282 |
| Fibronectin 1                                            | 2.821707 | 1.311211 | 2.40749  |
| liver basic fatty acid binding protein                   |          |          | 0.075157 |
| ChaC, cation transport regulator homolog 1 (E. coli)     | 0.928786 | 0.539401 | 0.152737 |

|                                                                |          |          |          |
|----------------------------------------------------------------|----------|----------|----------|
| peroxisome proliferator-activated receptor alpha               | 0.735794 | 0.533451 | 1.210725 |
| transcription factor 12                                        | 2.260632 | 2.128454 | 0.417361 |
| IKAROS family zinc finger 5 (Pegasus)                          |          | 2.223042 | 0.676382 |
| ezrin                                                          | 1.443182 | 1.575085 | 3.83333  |
| tumor protein p63                                              | 1.146249 | 1.277261 | 1.920407 |
| pepsinogen 5, group I (pepsinogen A)                           | 0.635799 | 1.043765 | 0.293249 |
| mitogen-activated protein kinase-activated protein kinase 5    | 0.933143 | 1.201472 | 2.237224 |
| zona pellucida glycoprotein 4                                  |          |          | 3.34976  |
| K123 protein                                                   | 3.40534  | 1.902315 | 2.500258 |
| MHC class II antigen alpha                                     | 4.592145 |          | 0.076628 |
| SMT3 suppressor of mif two 3 homolog 2 (S. cerevisiae)         | 0.498786 | 1.543504 | 1.064589 |
| thioredoxin                                                    | 0.689624 | 1.167329 | 2.181056 |
| similar to DNA segment, Chr 10, Johns Hopkins University       | 0.592957 | 1.357981 | 0.561674 |
| inhibitor of DNA binding 3, dominant negative helix-loop-helix | 0.785186 | 0.681411 | 0.486432 |
| inositol 1,4,5-trisphosphate 3-kinase A                        | 0.484473 |          | 0.578843 |
| connective tissue growth factor                                | 1.345394 | 3.707102 | 6.006635 |
| myosin, light chain 9, regulatory                              | 0.935583 | 1.010761 | 3.145778 |
| eukaryotic translation elongation factor 1 alpha 2             | 1.557678 | 1.237919 | 3.523644 |
| single stranded DNA binding protein 3                          | 0.742907 | 0.83286  | 0.555395 |
| single stranded DNA binding protein 3                          | 0.734363 | 0.923697 | 0.377603 |
| high-mobility group box 2                                      | 0.62518  | 1.019842 | 0.411563 |
| structural maintenance of chromosomes 2                        | 0.35282  | 1.07394  | 1.598716 |
| translin                                                       | 0.857721 | 1.182723 | 0.427666 |
| RAN, member RAS oncogene family pseudogene 1                   | 0.924468 | 1.166298 | 0.711692 |
| Colony stimulating factor 1 receptor, formerly McDonough 1     | 1.681139 | 1.856326 | 2.131509 |
| KIAA1143                                                       | 1.455395 | 1.343792 | 1.880992 |
| lumican                                                        | 1.042876 | 1.329704 | 0.492446 |
| smoothened homolog (Drosophila)                                | 1.047124 | 0.792557 | 1.00448  |
| homeodomain protein                                            | 0.14785  | 0.490027 | 0.082055 |
| frizzled homolog 1 (Drosophila)                                | 1.350525 | 0.992693 | 2.085886 |
| SLIT and NTRK-like family, member 4                            | 1.044662 | 2.992773 |          |
| wingless-type MMTV integration site family, member 5A          | 1.135773 | 1.511159 | 1.087464 |
| troponin T type 3 (skeletal, fast)                             | 1.088549 | 1.236266 | 2.394997 |
| myosin, light chain kinase                                     | 2.138912 | 2.255425 | 4.764131 |
| myosin, light chain kinase                                     | 2.049479 | 1.675162 | 3.003498 |
| epidermal growth factor receptor pathway substrate 15          | 0.188516 |          |          |
| epidermal growth factor receptor pathway substrate 15          | 0.451542 |          | 0.826646 |
| Similar to surfeit 6                                           |          |          |          |
| Similar to surfeit 6                                           | 0.985861 | 0.566278 | 0.484216 |
| parvalbumin                                                    |          | 1.111544 | 1.749523 |

|                                                                    |          |          |          |
|--------------------------------------------------------------------|----------|----------|----------|
| 2',3'-cyclic nucleotide 3' phosphodiesterase                       | 1.101307 | 1.324192 | 2.069201 |
| similar to guanine nucleotide exchange factor Lbc                  | 0.828839 | 0.082368 | 1.203497 |
| beta-carotene 15,15'-monooxygenase 1                               | 2.605689 | 1.706315 | 1.731462 |
| transmembrane 9 superfamily member 3                               | 0.342366 |          | 1.265467 |
| solute carrier family 15 (oligopeptide transporter), member 1      | 0.99668  |          | 5.197547 |
| tropomyosin 1 (alpha)                                              | 0.837434 | 1.238296 | 2.306769 |
| tropomyosin 1 (alpha)                                              | 1.673097 | 1.27741  | 0.932867 |
| ATP-binding cassette, sub-family B (MDR/TAP), member 1             | 0.835299 | 1.120161 | 2.229946 |
| ATP-binding cassette, sub-family B (MDR/TAP), member 1             | 2.150683 | 0.94219  | 1.982271 |
| immunoglobulin lambda-like polypeptide 1                           | 5.448275 | 1.050933 | 0.238897 |
| immunoglobulin lambda-like polypeptide 1                           | 5.161595 | 0.938063 | 0.443212 |
| immunoglobulin lambda-like polypeptide 1                           | 9.246994 | 1.096676 | 0.674674 |
| immunoglobulin lambda-like polypeptide 1                           | 11.01102 | 1.149009 | 0.29609  |
| immunoglobulin lambda-like polypeptide 1                           | 4.954589 | 0.917705 | 0.570688 |
| apolipoprotein B (including Ag(x) antigen)                         | 4.112413 | 3.871205 | 11.34393 |
| plasminogen                                                        | 0.892153 | 0.045099 |          |
| caspase 9, apoptosis-related cysteine peptidase                    | 0.725201 | 0.783359 | 1.902132 |
| aldehyde dehydrogenase 1 family, member A1                         |          | 2.26718  |          |
| tensin 1                                                           | 1.302631 | 1.10917  | 4.059835 |
| tensin 1                                                           | 0.958974 | 1.28006  | 4.31788  |
| cyclin A2                                                          | 0.982302 | 1.164301 | 0.660027 |
| enolase 2 (gamma, neuronal)                                        |          |          | 56.07011 |
| SMAD family member 5                                               | 1.939278 | 0.673686 | 0.475772 |
| cholinergic receptor, nicotinic, alpha 1 (muscle)                  | 1.40662  |          |          |
| Eukaryotic translation initiation factor 4 gamma, 2                | 0.069231 |          | 0.469529 |
| matrilin 1, cartilage matrix protein                               |          |          | 0.27936  |
| COP9 constitutive photomorphogenic homolog subunit 5 (Arabidopsis) |          | 0.877348 |          |
| COP9 constitutive photomorphogenic homolog subunit 5 (A            | 1.171588 | 1.01353  | 0.594752 |
| serpin peptidase inhibitor, clade B (ovalbumin), member 10         |          | 2.439484 |          |
| basigin (Ok blood group)                                           | 0.980935 | 1.035434 | 2.03819  |
| Similar to 5A11/Basigin-2                                          | 0.769055 | 1.055939 | 2.277059 |
| Thy-1 cell surface antigen                                         | 2.439451 |          | 3.356593 |
| high-mobility group nucleosomal binding domain 2                   | 0.902671 | 1.053582 | 0.836595 |
| exportin 7                                                         | 3.194124 | 1.361176 | 1.042347 |
| aldo-keto reductase family 1, member B10 (aldose reductase         | 1.52992  | 1.134194 | 1.728541 |
| neurofilament, medium polypeptide 150kDa                           | 1.876845 |          | 10.46685 |
| major histocompatibility complex class I glycoprotein              | 51.12829 | 1.198863 | 0.151755 |
| Interferon (alpha, beta and omega) receptor 1                      | 1.144494 | 1.541976 | 3.082514 |
| osteoglycin                                                        | 0.96708  | 1.430202 | 0.461611 |
| Chromosome 20 open reading frame 11                                | 1.093944 | 0.837037 | 0.31915  |

|                                                                       |          |          |          |
|-----------------------------------------------------------------------|----------|----------|----------|
| actin binding LIM protein family, member 2                            | 1.059682 | 0.835849 | 2.073928 |
| actin binding LIM protein family, member 2                            | 0.967739 | 1.056447 | 0.741894 |
| actin binding LIM protein family, member 2                            | 5.958656 | 0.965264 | 1.641827 |
| reticulon 4                                                           | 1.423933 | 0.750905 | 0.28446  |
| thymidine kinase 1, soluble                                           | 0.666907 | 1.039912 | 0.706779 |
| metallothionein 4                                                     | 0.538529 | 1.234744 | 4.500221 |
| cartilage associated protein                                          | 1.80795  | 1.041732 | 2.431079 |
| myomesin (M-protein) 2, 165kDa                                        | 1.226233 | 1.17856  | 3.387962 |
| myosin, heavy chain 1, skeletal muscle, adult /// myosin, hea         | 0.696685 | 1.805766 | 4.37316  |
| myosin, heavy chain 6, cardiac muscle, alpha                          | 1.354829 | 0.622946 | 0.705712 |
| myosin, heavy chain 6, cardiac muscle, alpha                          | 0.92749  | 0.634922 | 0.290472 |
| myosin, heavy chain 2, skeletal muscle, adult                         | 0.397025 | 1.152968 | 6.463645 |
| myosin, heavy chain 2, skeletal muscle, adult                         | 0.707415 | 1.560372 | 3.558466 |
| myosin, heavy chain 2, skeletal muscle, adult                         | 0.82104  | 1.687942 | 5.181946 |
| myosin, heavy chain 3, skeletal muscle, embryonic                     | 0.624262 | 1.288711 | 6.213583 |
| leukocyte cell-derived chemotaxin 2                                   | 0.40806  |          |          |
| V-set and immunoglobulin domain containing 1                          | 0.71702  | 0.853544 | 0.129565 |
| homeobox A4                                                           | 1.071721 | 0.436666 | 0.632379 |
| collagen, type VI, alpha 2                                            | 1.686763 | 1.61513  | 2.207325 |
| pterin-4 alpha-carbinolamine dehydratase/dimerization cofac           | 1.356997 | 1.667957 | 1.805767 |
| similar to trypsinogen /// similar to trypsinogen /// protease, s     | 0.714499 | 1.898014 | 0.130515 |
| similar to trypsinogen /// similar to trypsinogen /// protease, s     | 0.643639 | 2.704625 | 0.17036  |
| similar to trypsinogen /// similar to trypsinogen /// protease, s     | 0.879288 | 1.479195 | 0.246228 |
| CCAAT/enhancer binding protein (C/EBP), beta                          | 3.183117 | 1.78913  | 3.9086   |
| STT3, subunit of the oligosaccharyltransferase complex, homolog A (S. | 1.390512 |          | 2.436182 |
| tryptophan hydroxylase 1                                              |          |          |          |
| laminin, gamma 1 (formerly LAMB2)                                     | 1.286474 | 0.834486 | 8.491019 |
| argininosuccinate lyase                                               | 1.066633 | 1.095988 | 1.924217 |
| CDC-like kinase 3                                                     | 0.611095 | 1.325898 | 0.193721 |
| CDC-like kinase 3                                                     | 2.021563 | 0.891833 | 0.270181 |
| chromodomain helicase DNA binding protein 1                           | 0.581669 | 1.065166 | 1.288266 |
| desmuslin                                                             | 1.334009 | 0.743913 | 1.598707 |
| parvalbumin                                                           |          |          | 2.642986 |
| M-CK                                                                  | 1.436244 | 1.50211  | 4.369845 |
| SRY (sex determining region Y)-box 8                                  | 0.476003 | 0.760164 | 0.918338 |
| poly(A) polymerase alpha                                              | 0.929415 | 0.864458 | 0.409164 |
| calcium channel, voltage-dependent, N type, alpha 1B subun            | 1.507307 | 1.167711 | 5.638233 |
| Hypothetical protein LOC777119                                        | 1.963976 | 1.297868 | 3.338997 |
| 5'-nucleotidase, cytosolic III-like                                   | 1.565441 | 1.838761 | 2.333557 |
| growth hormone receptor                                               |          |          |          |

|                                                                   |          |          |          |
|-------------------------------------------------------------------|----------|----------|----------|
| heat shock 90kDa protein 1, beta                                  | 0.695728 | 1.153081 | 3.261774 |
| ubiquinol-cytochrome c reductase core protein I                   | 0.646914 | 1.004183 | 0.245383 |
| myb-like, SWIRM and MPN domains 1                                 | 2.723778 | 0.550297 | 0.698575 |
| hypothetical LOC417822                                            | 1.269712 | 0.73116  | 0.498579 |
| SWI/SNF related, matrix associated, actin dependent regulat       | 0.86944  | 1.132129 | 0.581305 |
| SWI/SNF related, matrix associated, actin dependent regulat       | 0.581549 | 1.334235 | 0.449481 |
| FYN oncogene related to SRC, FGR, YES                             | 0.919448 | 0.956497 | 1.598859 |
| tumor necrosis factor (ligand) superfamily, member 13b            | 4.18635  |          | 1.332464 |
| tumor necrosis factor (ligand) superfamily, member 13b            | 4.344528 | 2.074895 | 2.807566 |
| IKAROS family zinc finger 3 (Aiolos)                              |          | 0.758688 | 0.473643 |
| N-acetylgalactosaminidase, alpha-                                 | 1.007891 | 0.850476 | 2.152967 |
| tyrosine kinase 2                                                 | 0.908769 | 1.662795 | 2.64754  |
| minichromosome maintenance complex component 6                    | 0.68006  | 1.230358 | 0.445374 |
| putative homeodomain transcription factor 2                       | 2.194722 | 1.001889 | 2.960055 |
| cytochrome b5 reductase 2                                         | 0.914772 | 1.468586 | 2.601367 |
| interferon regulatory factor 4                                    | 1.210796 | 1.989222 | 4.052806 |
| general transcription factor IIIC, polypeptide 3, 102kDa          | 0.907548 | 0.822798 | 0.295363 |
| RAP1A, member of RAS oncogene family                              | 1.038861 | 1.000436 | 0.605261 |
| baculoviral IAP repeat-containing 2                               | 1.736308 | 1.185983 | 2.008698 |
| baculoviral IAP repeat-containing 2                               |          |          |          |
| baculoviral IAP repeat-containing 2                               | 2.011516 | 0.938414 | 0.904358 |
| ferritin, heavy polypeptide 1                                     | 0.899764 | 1.231652 | 2.015345 |
| ferritin, heavy polypeptide 1                                     | 0.898307 | 1.272444 | 1.70975  |
| ferritin, heavy polypeptide 1                                     | 0.93148  | 1.3161   | 1.88392  |
| B-cell CLL/lymphoma 2                                             | 1.135632 | 1.176446 | 0.578875 |
| prosaposin                                                        | 2.03521  | 1.171888 | 1.013222 |
| prosaposin                                                        | 1.202827 | 1.304221 | 1.77049  |
| chemokine (C-C motif) ligand 4                                    | 44.24128 | 2.403212 | 4.186489 |
| TAP binding protein (tapasin)                                     | 1.628076 | 1.502808 | 3.841823 |
| CD74 molecule, major histocompatibility complex, class II i       | 0.785448 | 1.360365 | 0.475867 |
| serpin peptidase inhibitor, clade I (neuroserpin), member 1       | 0.462794 | 0.330556 | 0.437571 |
| AQ                                                                |          | 2.598385 |          |
| reticulon 1                                                       | 1.376145 | 1.325764 | 2.43302  |
| Ubiquitin C                                                       | 0.428866 | 1.243454 | 0.788383 |
| SH3-domain GRB2-like 3                                            | 0.698229 | 0.719773 | 0.192579 |
| similar to T cell receptor alpha /// similar to T cell receptor a | 0.649243 | 0.819287 | 0.398818 |
| solute carrier family 35 (CMP-sialic acid transporter), member A1 |          | 4.959918 | 1.612063 |
| microtubule-associated protein 6                                  | 0.912957 | 2.572959 | 1.407207 |
| similar to T cell receptor alpha /// similar to T cell receptor a | 0.601656 | 1.622245 | 0.319731 |
| similar to trypsinogen /// similar to trypsinogen /// similar to  | 2.297392 | 0.397978 | 0.723272 |

|                                                                         |          |          |          |
|-------------------------------------------------------------------------|----------|----------|----------|
| nuclear receptor subfamily 2, group F, member 2                         | 2.403026 | 0.912786 | 2.707636 |
| G protein-coupled receptor kinase interactor 2                          | 0.493339 | 0.476068 | 2.083418 |
| phosphoenolpyruvate carboxykinase 1 (soluble)                           | 2.086015 | 8.059832 | 11.77938 |
| similar to T cell receptor alpha                                        | 0.507806 | 2.11918  | 0.702073 |
| Similar to T cell receptor alpha                                        | 1.111399 | 2.007769 | 0.324923 |
| chromosome 11 open reading frame 61                                     | 0.915147 | 0.721963 | 1.506452 |
| calmodulin 2 (phosphorylase kinase, delta)                              | 0.502205 | 1.451901 | 0.427296 |
| ribosomal protein L35a                                                  | 0.823987 | 1.061612 | 0.295896 |
| ets variant gene 4 (E1A enhancer binding protein, E1AF)                 | 0.935596 |          |          |
| SET translocation (myeloid leukemia-associated)                         |          |          | 0.245586 |
| ets variant gene 5 (ets-related molecule)                               | 1.68069  | 0.816462 | 1.997337 |
| ubiquitin specific peptidase like 1                                     | 1.395991 | 0.688265 | 0.602715 |
| RAD21 homolog (S. pombe)                                                | 0.935385 | 0.97097  | 0.644629 |
| ubiquitin-conjugating enzyme E2, J1 (UBC6 homolog, yeast                | 2.21311  | 1.06141  | 0.422673 |
| tight junction protein 2 (zona occludens 2)                             | 2.016054 | 1.333194 | 2.265444 |
| ribophorin II                                                           | 0.512491 | 0.532469 | 0.033608 |
| ribophorin II                                                           | 1.246151 | 2.383542 | 1.019391 |
| noggin                                                                  | 1.205825 | 0.789899 | 0.194961 |
| breast cancer 1, early onset                                            | 1.194908 | 0.853414 | 0.878823 |
| breast cancer 1, early onset                                            | 1.178662 | 1.044036 | 0.573774 |
| CD5 molecule                                                            | 1.368071 | 0.651383 | 2.859641 |
| Ribosomal protein S28                                                   | 0.638363 | 1.433071 | 0.028867 |
| T-cell, immune regulator 1, ATPase, H <sup>+</sup> transporting, lysoso | 1.26645  | 0.782934 | 2.171738 |
| Ribosomal protein S14                                                   | 1.220692 | 0.433853 |          |
| ribonucleotide reductase M1 polypeptide                                 | 0.65476  | 1.22573  | 0.465238 |
| ribonucleotide reductase M1 polypeptide                                 | 0.46559  | 1.400942 | 0.384154 |
| Peroxiredoxin 3                                                         | 0.785235 | 0.889637 | 0.662687 |
| septin 11                                                               | 0.914871 | 1.988639 | 4.187456 |
| DEAH (Asp-Glu-Ala-His) box polypeptide 15                               | 0.445588 | 0.929516 | 0.632981 |
| Dynein, light chain, Tctex-type 1                                       | 0.445155 | 1.021196 | 1.171619 |
| A kinase (PRKA) anchor protein (gravin) 12                              | 0.860583 | 0.905817 | 0.217087 |
| A kinase (PRKA) anchor protein (gravin) 12                              | 1.051182 | 0.922757 | 0.166999 |
| aldo-keto reductase family 1, member D1 (delta 4-3-ketoster             | 0.33322  | 1.637708 | 0.469655 |
| BRG1 protein                                                            | 1.07432  | 0.836249 | 2.276872 |
| myosin, heavy chain 10, non-muscle                                      | 0.489855 | 0.90766  | 1.098919 |
| fibrinogen beta chain                                                   | 2.575877 | 2.517073 | 1.964265 |
| MAX dimerization protein 4                                              | 0.962277 | 0.944927 | 0.27226  |
| selenoprotein X, 1                                                      | 0.911404 | 1.382293 | 3.532663 |
| Gal 9                                                                   | 0.467984 |          | 1.927778 |
| flavin containing monooxygenase 6 pseudogene                            | 1.089438 | 1.292397 | 2.047914 |



|                                                                          |          |          |          |
|--------------------------------------------------------------------------|----------|----------|----------|
| testis expressed 264                                                     | 0.665974 | 1.036112 | 1.563382 |
| ATP synthase, H <sup>+</sup> transporting, mitochondrial F0 complex, s   | 0.903838 | 0.50881  | 0.388963 |
| ATP synthase, H <sup>+</sup> transporting, mitochondrial F0 complex, s   | 1.501488 | 0.717417 | 1.124196 |
| ATP synthase, H <sup>+</sup> transporting, mitochondrial F0 complex, s   | 1.124611 | 1.135845 | 0.54758  |
| Ras association (RalGDS/AF-6) domain family member 2                     | 1.041237 | 0.97924  | 2.736708 |
| tubulin, beta 2A                                                         | 1.516339 | 0.913128 | 0.994758 |
| cytidine deaminase                                                       |          |          | 1.582584 |
| Arginine and glutamate rich 1                                            | 1.177871 | 0.507693 | 0.578405 |
| Ribosomal protein L24                                                    | 3.16002  | 0.444623 | 1.551792 |
| Ribosomal protein L24                                                    | 1.454909 | 1.018058 | 1.663791 |
| Rho-related BTB domain containing 2                                      |          | 2.401908 |          |
| hypothetical protein LOC422090                                           | 0.607094 | 0.648826 | 0.609992 |
| ATPase, Na <sup>+</sup> /K <sup>+</sup> transporting, beta 3 polypeptide | 1.123436 | 1.161511 | 0.762482 |
| parathymosin                                                             | 0.895582 | 0.89686  | 0.558567 |
| TAF13 RNA polymerase II, TATA box binding protein (TB                    | 1.020068 | 0.779855 | 0.484434 |
| Prefoldin subunit 1                                                      |          |          | 2.405358 |
| luteinizing hormone/choriogonadotropin receptor                          | 5.698554 |          |          |
| Similar to ubiquinol-cytochrome c reductase complex (7.2 kI              | 1.028595 | 0.51714  |          |
| Chromosome 10 open reading frame 84                                      | 1.058287 | 1.389564 | 0.387154 |
| Similar to RIKEN cDNA 2610205E22 gene                                    | 0.63223  | 0.950968 | 1.777977 |
| phosphohistidine phosphatase 1                                           | 0.630645 | 1.01182  | 1.086264 |
| Methyltransferase 10 domain containing                                   |          |          |          |
| apolipoprotein A-IV                                                      | 1.407931 | 2.653104 | 16.56821 |
| apolipoprotein A-IV                                                      | 1.337143 | 6.651408 | 10.93978 |
| TNF receptor-associated protein 1                                        | 0.979002 | 1.086292 | 2.133243 |
| similar to forkhead box M1                                               | 1.000024 | 0.921071 | 0.302815 |
| tyrosyl-tRNA synthetase                                                  | 0.826262 | 0.872648 | 2.548166 |
| Axin 1                                                                   |          |          | 9.006218 |
| axin 1                                                                   | 0.330739 |          | 2.346021 |
| chromosome 19 open reading frame 6                                       | 0.610014 | 1.285821 | 2.19593  |
| proteasome (prosome, macropain) 26S subunit, ATPase, 3                   | 0.974924 | 0.927891 | 0.333808 |
| ribosomal protein L31                                                    | 0.660996 | 1.23688  | 0.385137 |
| chromosome 19 open reading frame 12                                      | 1.214999 | 1.115983 | 1.846911 |
| Tubulin, alpha 1c                                                        | 0.777867 | 1.06269  | 1.780986 |
| tubulin, alpha 1c                                                        | 0.700344 | 1.133486 | 1.989681 |
| phosphoserine phosphatase                                                | 1.087507 | 1.132929 | 0.734171 |
| Hypothetical protein LOC769329                                           | 2.79315  | 0.763363 | 0.992896 |
| delta/notch-like EGF repeat containing                                   | 1.051727 | 0.61585  | 0.952448 |
| delta/notch-like EGF repeat containing                                   |          | 0.036485 | 0.732137 |
| T-box 19                                                                 | 16.58643 |          |          |

|                                                                |          |          |          |
|----------------------------------------------------------------|----------|----------|----------|
| ATPase, H <sup>+</sup> transporting, lysosomal V0 subunit a1   | 1.085255 | 1.132306 | 2.904278 |
| syndecan 2                                                     | 2.638214 | 1.698411 | 1.255259 |
| syndecan 2                                                     | 2.590996 | 1.094031 | 1.173189 |
| uracil-DNA glycosylase                                         | 0.449031 | 1.357674 | 0.542444 |
| uracil-DNA glycosylase                                         | 0.426424 | 1.203098 | 1.268414 |
| acyl-CoA thioesterase 8                                        | 1.156234 | 0.789999 | 1.2594   |
| forkhead box C2 (MFH-1, mesenchyme forkhead 1)                 | 1.251924 | 3.995772 | 1.273668 |
| MAX-like protein X                                             | 1.342559 | 0.72824  | 0.87619  |
| hypothetical LOC415641 /// similar to rat GCP360               | 0.506749 | 0.66297  |          |
| Nedd4 family interacting protein 1                             | 1.475397 | 0.911015 | 0.729199 |
| dihydroorotate dehydrogenase                                   | 0.958958 | 1.050279 | 1.33249  |
| calcium binding and coiled-coil domain 2                       | 2.251957 | 1.337964 | 1.309682 |
| RNA-binding region (RNP1, RRM) containing 3                    | 0.595475 | 0.796002 | 0.296782 |
| 3-oxoacid CoA transferase 1                                    | 0.239166 | 0.77517  | 0.98029  |
| Splicing factor, arginine/serine-rich 3                        | 1.605942 | 0.608975 | 0.398448 |
| apolipoprotein A-I                                             | 2.912112 | 2.35725  | 11.29423 |
| apolipoprotein A-I                                             | 2.872472 | 3.289707 | 10.73986 |
| leukocyte cell derived chemotaxin 1                            | 2.362088 | 1.128756 |          |
| heat shock protein 90kDa beta (Grp94), member 1                | 0.983007 | 1.210481 | 0.517083 |
| heat shock protein 90kDa beta (Grp94), member 1                | 1.118497 | 0.945232 | 0.422426 |
| PTPRF interacting protein, binding protein 1 (liprin beta 1)   | 1.076719 | 0.955409 | 2.644161 |
| chromosome 6 open reading frame 72                             | 2.18079  | 1.706639 | 1.082319 |
| Ribosomal protein L18a                                         | 1.770263 | 0.355497 | 1.134778 |
| N-ethylmaleimide-sensitive factor attachment protein, beta     | 1.285607 | 0.812916 | 0.980583 |
| syndecan binding protein (syntenin)                            | 1.304637 | 0.51412  | 0.49627  |
| low density lipoprotein receptor-related protein 11            | 0.998433 | 1.170849 | 0.280612 |
| low density lipoprotein receptor-related protein 11            | 0.993847 | 1.00715  | 0.172741 |
| low density lipoprotein receptor-related protein 11            | 0.911542 | 1.907555 | 0.099401 |
| neogenin                                                       | 0.713216 | 1.37037  | 2.074396 |
| peptidase (mitochondrial processing) alpha                     | 1.445104 | 0.928074 | 1.034978 |
| NADH dehydrogenase (ubiquinone) 1 beta subcomplex, 1, 7        | 0.665008 | 1.386714 | 0.907804 |
| solute carrier family 25 (mitochondrial carrier; phosphate car | 0.860839 | 0.692986 | 0.795063 |
| hydroxyacyl-Coenzyme A dehydrogenase                           | 1.015249 | 1.145393 | 0.933849 |
| follicle stimulating hormone receptor                          |          | 2.165758 | 0.104784 |
| FK506 binding protein 5                                        | 1.212912 | 1.405607 | 5.669345 |
| heterochromatin protein 1, binding protein 3                   |          | 20.17082 |          |
| heterochromatin protein 1, binding protein 3                   | 1.179015 | 0.876601 | 0.435047 |
| cold inducible RNA binding protein                             | 0.809932 | 0.676785 | 0.288173 |
| mitogen-activated protein kinase kinase kinase 4               |          |          | 0.023524 |
| TEA domain family member 3                                     | 1.018862 | 1.075611 | 5.083906 |

|                                                                                                 |          |          |          |
|-------------------------------------------------------------------------------------------------|----------|----------|----------|
| ADP-ribosylation factor-like 1                                                                  | 1.902004 | 0.718319 | 2.337192 |
| N-acetyltransferase 11                                                                          | 1.236814 | 0.804751 | 1.81395  |
| v-ets erythroblastosis virus E26 oncogene homolog 2 (avian)                                     | 0.674048 | 0.984679 | 0.99776  |
| cullin 3                                                                                        | 0.421565 | 1.401377 | 0.549407 |
| YY1 transcription factor                                                                        | 1.105242 | 0.903242 | 0.337223 |
| YY1 transcription factor                                                                        | 0.845005 | 1.10045  | 0.281634 |
| nonhistone chromosomal protein HMG-14A                                                          | 0.678061 | 1.303735 | 0.376384 |
| similar to rat ribosomal protein L9 homologue /// ribosomal p                                   | 0.487172 | 0.688504 | 0.55611  |
| heterogeneous nuclear ribonucleoprotein A/B                                                     | 0.778653 | 0.96067  | 0.39242  |
| heterogeneous nuclear ribonucleoprotein A/B                                                     | 1.124266 | 0.524747 | 0.21477  |
| nitrilase family, member 2                                                                      | 1.27417  | 1.13686  | 2.112856 |
| short chain dehydrogenase/reductase family 16C, member 5                                        |          |          | 0.337055 |
| Family with sequence similarity 70, member A                                                    | 0.800244 | 0.371891 | 0.816598 |
| interferon-induced protein 35                                                                   | 1.552919 | 1.661799 | 4.42231  |
| NFS1 nitrogen fixation 1 homolog (S. cerevisiae)                                                | 2.677341 |          | 0.378892 |
| kelch domain containing 2                                                                       | 0.811959 | 0.951217 | 0.275237 |
| glycoprotein M6A                                                                                |          |          | 2.280123 |
| protein phosphatase 1M (PP2C domain containing)                                                 | 1.111465 | 1.130212 | 2.140487 |
| D4, zinc and double PHD fingers family 2                                                        |          | 2.259666 |          |
| Eukaryotic translation initiation factor 3, subunit E                                           | 0.687992 | 0.407785 |          |
| Synaptosomal-associated protein, 25kDa                                                          |          | 13.10662 | 0.178516 |
| lysine (K)-specific demethylase 6A                                                              | 1.108347 | 0.685729 | 0.881194 |
| fibromodulin                                                                                    |          |          |          |
| heterogeneous nuclear ribonucleoprotein K                                                       | 1588.08  | 1.682791 | 0.121908 |
| F-box protein 45                                                                                | 1.215812 | 0.788066 | 0.463071 |
| solute carrier family 25 (mitochondrial carrier; adenine nucle                                  | 0.758837 | 1.039583 | 0.570798 |
| cathepsin K                                                                                     | 1.901841 | 0.978035 | 6.941406 |
| secreted frizzled-related protein 1                                                             |          | 1.366381 | 1.129531 |
| secreted frizzled-related protein 1                                                             | 1.436882 | 1.379674 | 2.073058 |
| hypothetical protein LOC770612                                                                  | 1.275535 | 1.342615 | 2.741159 |
| clathrin, light chain (Lca)                                                                     | 0.517436 | 1.016894 | 0.539242 |
| transmembrane protein 141                                                                       | 0.508626 | 0.814085 | 2.22877  |
| transmembrane protein 141                                                                       | 0.777029 | 1.049759 | 2.599233 |
| keratocan                                                                                       | 0.21066  |          |          |
| chromosome 19 open reading frame 10                                                             | 0.911731 | 0.773404 | 0.467659 |
| malate dehydrogenase 2, NAD (mitochondrial)                                                     | 0.415464 | 1.221882 | 0.452101 |
| solute carrier family 4, anion exchanger, member 1                                              | 0.919006 | 1.531883 | 6.659634 |
| similar to Splicing factor, arginine/serine-rich 5 (Pre-mRNA splicing factor SRP40) (Insulin-in |          |          |          |
| similar to Splicing factor, arginine/serine-rich 5 (Pre-mRNA                                    | 2.668459 | 0.862527 | 0.237566 |
| similar to Splicing factor, arginine/serine-rich 5 (Pre-mRNA                                    | 2.037853 | 0.934468 | 0.247267 |

|                                                               |          |          |          |
|---------------------------------------------------------------|----------|----------|----------|
| anti-apoptotic NR13                                           | 2.453153 | 1.766065 | 1.424677 |
| anti-apoptotic NR13                                           | 2.158319 | 1.290584 | 2.82547  |
| E74-like factor 1 (ets domain transcription factor)           | 2.675926 | 1.07645  | 0.623937 |
| TEA domain family member 4                                    | 0.756701 | 0.910445 | 3.38156  |
| TEA domain family member 4                                    |          | 0.434403 | 1.063371 |
| glutamate receptor interacting protein 1                      | 2.438266 | 0.844209 | 0.728762 |
| Collagen, type III, alpha 1                                   | 1.424586 | 0.948552 | 0.456862 |
| collagen, type III, alpha 1                                   | 1.164115 | 1.47033  | 0.442051 |
| chromosome 20 open reading frame 149                          | 0.966754 | 1.116317 | 1.498564 |
| Hypothetical protein LOC769345                                | 0.266146 | 1.280727 | 0.612983 |
| peripheral myelin protein 22                                  | 1.633519 | 1.18964  | 3.235665 |
| ring finger protein 185                                       | 1.009033 |          | 0.394611 |
| Thioredoxin domain containing 17                              | 0.700299 | 1.437902 | 1.548981 |
| Thioredoxin domain containing 17                              | 0.685325 | 1.12902  | 1.423831 |
| pancreatic lipase                                             |          | 0.293705 |          |
| actin, alpha, cardiac muscle 1                                | 2.070329 | 1.012052 | 0.796038 |
| proteasome (prosome, macropain) 26S subunit, ATPase, 5        | 0.754621 | 1.098081 | 2.156943 |
| heat shock 10kDa protein 1 (chaperonin 10)                    | 0.67532  | 1.283343 | 0.735774 |
| tubulin, beta 2C                                              | 0.718087 | 1.053637 | 0.552155 |
| ribosomal protein L7                                          | 0.500601 | 1.692474 |          |
| heat shock protein 90kDa alpha (cytosolic), class A member    | 1.182123 | 1.067484 | 0.611024 |
| ankyrin repeat and SOCS box-containing 7                      |          |          | 0.785851 |
| annexin A1                                                    | 1.026395 | 1.606552 | 3.321433 |
| protein tyrosine phosphatase type IVA, member 1               | 1.125818 | 0.91726  | 0.221047 |
| neurofascin                                                   | 1.172478 | 1.357663 | 4.278413 |
| heterogeneous nuclear ribonucleoprotein A2/B1                 | 1.000875 | 1.072747 | 0.434595 |
| Similar to Glutathione peroxidase 3 precursor (GSHPx-3) (G    | 0.367002 | 1.571138 | 2.607494 |
| chromobox homolog 4 (Pc class homolog, Drosophila)            | 2.06627  | 1.559492 | 2.221932 |
| similar to C-type lectin-like receptor                        | 0.751193 | 0.99028  | 2.032943 |
| similar to amino acid feature: cytoplasmic domain, aa 1 .. 91 | 1.040759 | 0.537422 | 2.001983 |
| Similar to amino acid feature: cytoplasmic domain, aa 1 .. 91 | 1.076662 | 0.613692 | 0.44729  |
| POU class 2 associating factor 1                              |          |          | 30.79568 |
| GTPase activating protein (SH3 domain) binding protein 1      | 1.203321 | 1.723271 | 0.419683 |
| GA binding protein transcription factor, beta subunit 2       | 1.328677 | 0.887625 | 0.572416 |
| similar to KIAA0332                                           | 2.523221 | 0.890087 | 0.359522 |
| PMS1 postmeiotic segregation increased 1 (S. cerevisiae)      | 1.082018 | 0.746021 | 0.189908 |
| hypoxia-inducible factor 1, alpha subunit (basic helix-loop-h | 1.4999   | 0.964642 | 1.79941  |
| amylase, alpha 2A; pancreatic                                 | 3.582466 | 0.834391 | 0.86267  |
| fatty acid binding protein 4, adipocyte                       | 2.330237 | 2.642717 | 8.966799 |
| ubiquitin-conjugating enzyme E2I (UBC9 homolog, yeast)        | 0.983813 | 1.046562 | 0.493064 |

|                                                                           |          |          |          |
|---------------------------------------------------------------------------|----------|----------|----------|
| heat shock protein 70                                                     | 0.884643 | 0.713653 | 0.307583 |
| FK506 binding protein 1A, 12kDa                                           | 0.486498 | 1.206847 | 0.659624 |
| sterol regulatory element binding transcription factor 2                  | 0.500291 | 1.009037 | 2.294434 |
| gallinacin 2                                                              | 0.333622 | 0.834702 |          |
| frizzled-related protein                                                  | 2.160465 | 1.128953 | 2.198675 |
| left-right determination factor 2                                         | 0.766613 |          | 1.200408 |
| xin actin-binding repeat containing 2                                     | 2.440415 | 0.597299 | 1.297783 |
| similar to T-cell receptor gamma Vg3-Jg3                                  | 0.543679 | 0.971814 | 0.280655 |
| similar to T-cell receptor gamma Vg3-Jg3                                  | 0.844008 | 1.142423 | 0.232822 |
| similar to T-cell receptor gamma V2.6a /// similar to T-cell r            | 0.554365 | 0.765848 | 0.304534 |
| similar to T-cell receptor gamma V2.6a /// similar to T-cell r            | 0.653389 | 1.368582 | 0.200312 |
| similar to T-cell receptor gamma Vg3-Jg3                                  | 0.724182 | 0.969471 | 0.156519 |
| similar to T cell receptor gamma /// similar to T-cell receptor           | 0.885524 | 1.183984 | 0.192625 |
| similar to T-cell receptor gamma Vg3-Jg3 /// similar to T-cel             | 0.578105 | 1.499778 | 0.4413   |
| Similar to T-cell receptor gamma chain Vg1-Jg2                            | 0.717015 | 1.118853 | 0.140873 |
| similar to T-cell receptor gamma chain Vg3-Jg3 /// similar to             | 0.803434 | 1.213619 | 0.492432 |
| similar to T-cell receptor gamma Vg3-Jg3                                  | 0.951674 | 1.014395 | 0.228973 |
| Similar to T-cell receptor gamma chain Vg3-Jg3                            | 0.787407 | 0.918063 | 0.564299 |
| similar to T-cell receptor gamma chain Vg3-Jg3 /// similar to T-cell rece | 0.275827 |          |          |
| similar to T-cell receptor gamma chain Vg3-Jg3 /// similar to T-cell rece | 37.9857  |          |          |
| similar to T cell receptor gamma /// similar to T-cell receptor           | 0.754327 | 4.102089 | 0.180623 |
| similar to T cell receptor gamma /// similar to T-cell receptor           | 0.856413 | 1.034776 | 0.158959 |
| similar to T-cell receptor gamma Vg3-Jg3 /// similar to T-cel             | 33.68452 |          |          |
| similar to T cell receptor gamma /// similar to T-cell receptor           | 0.931211 | 1.107974 | 0.17919  |
| Similar to T-cell receptor gamma chain Vg3-Jg3                            | 1.064038 | 0.780954 | 0.344593 |
| similar to T-cell receptor gamma chain Vg3-Jg3 /// similar to             | 0.553338 | 1.42418  | 0.418942 |
| collagen, type XII, alpha 1                                               | 0.322542 | 1.149299 | 1.556154 |
| protein tyrosine phosphatase, receptor type, A                            | 0.633593 | 2.27682  | 0.565882 |
| protein tyrosine phosphatase, receptor type, A                            | 0.941653 | 0.892133 | 0.479513 |
| major histocompatibility complex class I glycoprotein                     | 2.650126 | 3.963451 | 2.292785 |
| MHC class I antigen B-F minor heavy chain /// major histoc                | 1.529753 | 1.428223 | 3.495125 |
| MHC class I antigen B-F minor heavy chain /// major histoc                | 2.922054 | 3.477581 | 2.752367 |
| versican                                                                  | 1.271077 | 1.241033 | 11.40564 |
| versican                                                                  | 1.305076 | 1.227105 | 8.109183 |
| tropomyosin 3                                                             | 0.710645 | 1.823288 | 3.573499 |
| tropomyosin 3                                                             | 0.718165 | 1.258401 | 3.330654 |
| tropomyosin 3                                                             | 0.529558 | 1.141268 | 2.584088 |
| tropomyosin 3                                                             | 1.12302  | 1.351888 | 2.593454 |
| msh homeobox 2                                                            | 0.576945 |          |          |
| calbindin 2, 29kDa (calretinin)                                           | 0.660327 | 1.04533  | 1.271115 |

|                                                                |          |          |          |
|----------------------------------------------------------------|----------|----------|----------|
| transcription factor 3 (E2A immunoglobulin enhancer bindin     | 0.918753 | 0.595022 | 0.336324 |
| adenosine A1 receptor                                          |          |          |          |
| hemoglobin, gamma A /// hemoglobin, gamma G                    | 0.541377 | 1.500658 | 4.681903 |
| hemoglobin, epsilon 1 /// hemoglobin, gamma G                  | 0.359922 | 1.146098 |          |
| Aldolase A                                                     | 1.235883 | 1.294688 | 3.016856 |
| troponin T type 2 (cardiac)                                    | 0.923498 | 0.47623  | 2.799286 |
| histone deacetylase 1                                          | 0.612679 | 1.12208  | 1.391247 |
| myosin binding protein C, fast type                            | 0.198327 | 1.900271 | 1.035484 |
| caldesmon 1                                                    | 3.172612 | 1.628333 | 2.685914 |
| caldesmon 1                                                    | 3.187307 | 1.908553 | 3.290035 |
| Similar to T-cell receptor gamma chain Vg2-Jg3                 | 1.330215 | 0.527027 | 0.714302 |
| similar to T-cell receptor gamma chain Vg2-Jg3                 | 1.85124  | 0.643863 | 0.158075 |
| integrin, alpha 4 (antigen CD49D, alpha 4 subunit of VLA-4     | 1.82431  | 0.943908 | 0.570116 |
| integrin, alpha 4 (antigen CD49D, alpha 4 subunit of VLA-4     | 0.229002 | 2.435542 | 1.831747 |
| midkine (neurite growth-promoting factor 2)                    | 0.424486 | 0.794086 | 1.725156 |
| chitinase, acidic                                              | 0.565937 |          |          |
| chitinase, acidic                                              |          | 1.539676 | 2.644258 |
| cyclin-dependent kinase inhibitor 2B (melanoma, p16, inhibi    | 1.373595 | 3.960395 | 8.144782 |
| cyclin-dependent kinase inhibitor 2A (melanoma, p16, inhibi    | 0.967598 | 2.026598 | 9.333667 |
| matrix metalloproteinase 27                                    |          | 2.751026 |          |
| zinc finger protein, X-linked                                  | 0.807273 | 0.845242 | 0.698979 |
| high mobility group AT-hook 2                                  |          |          | 0.348919 |
| Y-Lb III                                                       | 0.492517 |          | 0.337535 |
| 5'-nucleotidase, cytosolic III                                 | 0.997652 | 1.26247  | 2.079237 |
| ST8 alpha-N-acetyl-neuraminide alpha-2,8-sialyltransferase     | 0.874925 | 1.030417 | 0.364429 |
| similar to Trappin-6                                           | 1.987057 | 2.484322 | 7.304639 |
| ovomucoid                                                      | 0.782916 | 8.413291 |          |
| immunoglobulin, light chain, lambda, psi-V12 pseudogene        | 4.896084 |          |          |
| caveolin 1, caveolae protein, 22kDa                            | 1.936309 | 1.338037 | 2.888219 |
| Annexin A2                                                     | 0.75832  | 0.986475 | 1.173838 |
| cholinergic receptor, nicotinic, alpha 3                       | 0.997979 | 2.555238 |          |
| zinc finger and BTB domain containing 16                       |          |          |          |
| v-myc myelocytomatosis viral related oncogene, neuroblasto     | 0.828277 | 0.882906 | 0.450608 |
| T-cell leukemia homeobox 1                                     | 0.493672 | 1.031957 |          |
| coiled-coil domain containing 80                               | 1.053565 | 2.114327 | 2.363409 |
| interleukin 8                                                  | 2.140995 | 1.506982 | 0.827026 |
| homeobox A7                                                    | 0.470708 | 0.388534 | 0.141218 |
| glutamate receptor, ionotropic, AMPA 2                         |          |          | 0.664741 |
| similar to T-cell receptor gamma V2.9 /// similar to T-cell re | 1.389433 | 0.690251 | 0.48086  |
| coagulation factor VIII, procoagulant component                | 0.946846 |          | 3.079478 |

|                                                                 |          |          |          |
|-----------------------------------------------------------------|----------|----------|----------|
| coagulation factor VII (serum prothrombin conversion accel      | 1.248867 | 0.616666 | 2.708629 |
| deleted in azoospermia-like                                     |          |          | 4.304927 |
| MHC class II beta chain                                         | 1.236546 | 0.014338 | 0.157274 |
| coagulation factor X                                            | 1.455787 | 1.021522 | 0.431387 |
| Selenophosphate synthetase 1                                    | 0.630319 | 1.102054 | 0.435277 |
| Selenophosphate synthetase 1                                    | 0.794505 | 1.079438 | 0.45019  |
| damage-specific DNA binding protein 1, 127kDa                   |          |          | 1.43955  |
| MHC class II beta chain                                         |          |          | 0.328747 |
| tumor necrosis factor receptor superfamily, member 1B           | 55.29062 | 60.74509 | 45.66635 |
| tumor necrosis factor receptor superfamily, member 1B           | 0.859649 | 1.310199 | 2.996088 |
| tumor necrosis factor receptor superfamily, member 1B           | 1.536882 | 1.326694 | 2.704626 |
| periostin, osteoblast specific factor                           | 2.087969 | 1.939728 | 3.153747 |
| calcium channel, voltage-dependent, beta 4 subunit              | 0.684139 | 0.577157 | 0.609833 |
| ankyrin 3                                                       | 2.203751 |          |          |
| coagulation factor V (proaccelerin, labile factor)              | 2.809604 | 1.01958  | 1.665368 |
| nerve growth factor, beta polypeptide                           | 2.25937  |          |          |
| BCL2-related protein A1                                         | 1.445537 | 2.094443 | 1.022752 |
| BCL2-related protein A1                                         | 2.546234 | 1.767735 | 1.832059 |
| tetraspanin 32                                                  | 0.255027 | 5.541969 |          |
| CD81 molecule                                                   | 0.792722 | 1.353054 | 2.405307 |
| Ubiquitin-conjugating enzyme E2G 2 (UBC7 homolog, yeas          | 0.891282 | 0.961749 | 0.471695 |
| MHC class II antigen B-F minor heavy chain                      | 82.2093  | 1.550271 | 20.57477 |
| podocalyxin-like                                                | 1.959234 | 1.103526 | 2.596262 |
| cadherin 5, type 2, VE-cadherin (vascular epithelium)           | 1.50848  | 1.352947 | 3.084893 |
| PHD finger protein 20-like 1                                    | 1.077915 | 0.87604  | 0.577689 |
| MICAL-like 1                                                    | 2.08765  | 0.746858 | 1.362183 |
| protein tyrosine phosphatase, receptor type, F                  | 1.07654  | 0.743461 | 0.218023 |
| MHC class II antigen B-F minor heavy chain                      | 0.575303 | 0.327192 | 2.416155 |
| tumor necrosis factor receptor superfamily, member 8            | 0.98776  | 2.48984  | 30.0138  |
| sequestosome 1                                                  | 0.813031 | 1.240324 | 1.109344 |
| sequestosome 1                                                  | 0.655103 | 1.719309 | 1.618457 |
| extracellular leucine-rich repeat and fibronectin type III cont | 0.076604 |          |          |
| Sin3A-associated protein, 30kDa                                 | 0.7138   | 1.19569  | 0.345998 |
| abl-interactor 1                                                | 1.058468 | 1.151038 | 0.328345 |
| benzodiazapine receptor (peripheral)-like 1                     | 1.288463 | 1.705162 | 11.13672 |
| ubiquilin 1                                                     | 0.56816  | 0.842938 | 0.49913  |
| G kinase anchoring protein 1                                    | 0.589809 | 0.767143 | 0.397323 |
| nucleoporin 98kDa                                               | 0.845391 | 1.083331 | 1.470052 |
| KIAA1609                                                        | 5.698385 |          | 1.20708  |
| chromosome 18 open reading frame 22                             | 0.920163 | 1.554122 | 0.482689 |

|                                                                      |          |          |          |
|----------------------------------------------------------------------|----------|----------|----------|
| protein phosphatase 4, regulatory subunit 2                          | 0.739475 | 0.730172 | 0.53992  |
| Protein phosphatase 4, regulatory subunit 2                          | 0.944258 | 0.791495 | 0.643413 |
| CWC15 homolog (S. cerevisiae)                                        |          | 0.642793 | 0.166878 |
| importin 7                                                           |          |          |          |
| hydroxysteroid (17-beta) dehydrogenase 11                            | 1.407862 | 1.123146 | 2.038054 |
| poly-U binding splicing factor 60KDa                                 | 1.021998 | 0.777697 | 0.493606 |
| poly-U binding splicing factor 60KDa                                 | 1.00442  | 1.099292 | 0.393068 |
| KIAA0317                                                             | 1.114203 | 0.996004 | 0.554804 |
| KIAA0317                                                             | 0.593424 | 0.491691 | 0.693312 |
| EGF-containing fibulin-like extracellular matrix protein 1           | 2.342815 | 1.626154 | 2.954254 |
| REX1, RNA exonuclease 1 homolog (S. cerevisiae)                      | 0.611735 | 1.067341 | 2.239926 |
| acetyl-Coenzyme A acetyltransferase 2 (acetoacetyl Coenzyme A)       | 0.705832 | 1.424854 | 5.051304 |
| Hypothetical LOC422270                                               | 0.238976 | 0.029613 |          |
| threonyl-tRNA synthetase-like 2                                      | 1.293524 | 1.046046 | 2.267955 |
| acylphosphatase 2, muscle type                                       | 1.214207 | 1.082935 | 0.346811 |
| scavenger receptor class B, member 2                                 | 1.14017  | 1.034861 | 0.327016 |
| LanC lantibiotic synthetase component C-like 1 (bacterial)           | 1.449018 | 1.128645 | 2.184961 |
| thyrotrophic embryonic factor                                        | 1.097947 | 0.673741 | 0.852546 |
| Glycerol-3-phosphate dehydrogenase 1 (soluble)                       | 1.581014 | 2.486872 | 5.387204 |
| cell adhesion molecule 1                                             | 3.209706 | 1.62939  | 2.15969  |
| hypothetical LOC424892                                               | 1.858654 | 1.140383 | 0.885211 |
| calcium channel, voltage-dependent, L type, alpha 1D subunit         | 0.570428 | 1.218933 | 0.914784 |
| phosphodiesterase 6D, cGMP-specific, rod, delta                      | 0.803525 | 1.276408 | 0.653009 |
| sprouty-related, EVH1 domain containing 1                            | 2.319846 | 1.334798 | 1.401625 |
| autocrine motility factor receptor                                   | 0.538469 | 1.100284 | 1.61409  |
| autocrine motility factor receptor                                   | 0.575394 | 0.950025 | 1.371152 |
| leucine rich repeat and fibronectin type III domain containing 1     | 1.052271 | 0.544292 |          |
| MADS box transcription enhancer factor 2, polypeptide C (nucleosome) | 0.641595 | 1.105303 | 7.021376 |
| B-cell CLL/lymphoma 7A                                               | 0.948284 | 0.948012 | 0.341429 |
| similar to Phosphopantothienoylcysteine synthetase                   | 2.546998 | 1.484635 | 1.212395 |
| SH3 and multiple ankyrin repeat domains 2                            | 0.925095 | 0.862211 | 0.427279 |
| alkB, alkylation repair homolog 2 (E. coli)                          | 0.806847 | 0.907613 | 0.465968 |
| mitochondrial ribosomal protein S6                                   | 0.982418 | 1.001419 | 0.193359 |
| O-sialoglycoprotein endopeptidase-like 1                             | 1.00554  | 1.306376 | 0.645201 |
| dipeptidyl-peptidase 7                                               | 1.496789 | 0.775026 | 1.562109 |
| hypothetical LOC417676                                               | 10.98071 | 1.594213 | 0.665877 |
| 2'-5'-oligoadenylate synthetase-like                                 | 3.970471 | 2.15335  | 4.969732 |
| TSC22 domain family, member 3                                        | 0.88558  | 1.15269  | 1.829182 |
| alcohol dehydrogenase 5 (class III), chi polypeptide                 | 1.236044 | 0.569743 | 0.253648 |
| sodium channel, nonvoltage-gated 1, gamma                            | 1.210607 | 0.648087 | 1.08509  |



|                                                                 |          |          |          |
|-----------------------------------------------------------------|----------|----------|----------|
| vascular endothelial growth factor A                            | 1.351935 | 0.852406 | 5.718562 |
| transmembrane protein 45B                                       |          |          |          |
| heterogeneous nuclear ribonucleoprotein U (scaffold attachr     | 1.066663 | 0.999255 | 0.332355 |
| programmed cell death 2-like /// programmed cell death 2-lik    | 1.120076 | 1.361906 | 0.598636 |
| NIMA (never in mitosis gene a)-related kinase 4                 | 0.494694 | 1.099811 | 2.455619 |
| argininosuccinate synthetase 1                                  | 2.24455  | 1.560624 | 3.1731   |
| tumor necrosis factor receptor superfamily, member 6b, decc     | 1.140377 | 1.285186 | 3.867566 |
| CD247 molecule                                                  | 0.767646 | 0.916114 | 0.523669 |
| similar to serine protease                                      | 2.321678 | 1.642544 | 1.982518 |
| serine/threonine kinase 40                                      | 0.974029 | 0.579766 | 1.62939  |
| complement component 1, q subcomponent, B chain                 | 1.808432 | 1.533044 | 5.473615 |
| cytochrome P450, family 2, subfamily J, polypeptide 2           | 23.50637 |          | 1.072459 |
| cytochrome P450, family 2, subfamily J, polypeptide 2           |          | 1.406416 | 0.374089 |
| ArfGAP with GTPase domain, ankyrin repeat and PH domai          | 2.084784 | 0.813038 | 1.722864 |
| matrix Gla protein                                              | 0.989151 | 1.7845   | 2.789399 |
| dehydrogenase/reductase (SDR family) member 7                   | 0.690867 | 1.123668 | 1.412047 |
| transcription elongation factor A (SII), 2                      | 1.186286 | 0.909473 | 1.858145 |
| Lon peptidase 1, mitochondrial                                  | 0.494841 | 0.998595 | 1.226877 |
| claudin 11 (oligodendrocyte transmembrane protein)              | 1.321864 | 0.883127 | 2.141491 |
| lymphotactin                                                    | 1.732345 | 1.424461 | 0.218577 |
| EF-hand domain family, member A1                                | 1.25336  | 0.613947 | 0.561221 |
| Ras-related GTP binding B                                       | 0.892747 | 0.886014 | 2.443743 |
| B-cell CLL/lymphoma 7A                                          | 1.42738  | 0.664805 | 0.322104 |
| HIV-1 Tat interactive protein 2, 30kDa                          | 1.250539 | 1.148859 | 2.215647 |
| 3-hydroxybutyrate dehydrogenase, type 1                         | 0.36844  |          |          |
| 3-hydroxybutyrate dehydrogenase, type 1                         |          |          |          |
| adaptor-related protein complex 4, beta 1 subunit               | 1.437441 | 0.930288 | 1.637158 |
| CDK5 regulatory subunit associated protein 1-like 1             | 1.507991 | 0.508701 | 0.452755 |
| cytokine induced apoptosis inhibitor 1                          | 0.576872 | 0.786839 | 0.255281 |
| regulator of calcineurin 1                                      | 0.547729 | 0.724827 | 0.42571  |
| dynein, cytoplasmic 2, light intermediate chain 1               |          | 1.033488 | 1.964672 |
| polymerase (DNA directed), epsilon 3 (p17 subunit)              | 1.189306 | 0.974556 | 1.045701 |
| mitochondrial ribosomal protein L42                             | 0.463867 |          |          |
| SGT1, suppressor of G2 allele of SKP1 (S. cerevisiae)           | 0.756103 | 1.049747 | 0.131062 |
| muscle RAS oncogene homolog                                     | 1.207995 | 1.054107 | 0.80307  |
| dihydrouridine synthase 1-like (S. cerevisiae)                  | 0.725351 | 0.717935 | 2.504314 |
| hypothetical LOC415950                                          | 0.511821 | 0.970807 | 1.129451 |
| similar to nuclear DNA-binding protein; small unique nuclea     | 0.84506  | 0.933464 | 1.423822 |
| deiodinase, iodothyronine, type III                             | 0.313675 | 1.272375 | 2.599575 |
| Solute carrier family 25 (mitochondrial carrier; citrate transp | 0.65629  | 0.843    | 0.481905 |

|                                                                                             |          |          |          |
|---------------------------------------------------------------------------------------------|----------|----------|----------|
| tetraspanin 1                                                                               | 1.676545 | 2.283681 | 1.437146 |
| Mitogen-activated protein kinase 14                                                         | 0.829029 | 1.162616 | 2.008992 |
| deiodinase, iodothyronine, type I                                                           | 1.106436 | 2.278016 | 1.626527 |
| smu-1 suppressor of mec-8 and unc-52 homolog (C. elegans)                                   | 0.886914 | 3.014845 | 1.544358 |
| LATS, large tumor suppressor, homolog 1 (Drosophila)                                        | 2.233899 | 0.829313 | 0.298898 |
| FUN14 domain containing 1                                                                   | 1.258837 | 0.981398 | 0.763096 |
| hepatocyte growth factor (hepapoietin A; scatter factor)                                    |          | 2.097648 |          |
| diacylglycerol lipase, beta                                                                 | 1.638612 | 0.898428 | 0.839749 |
| platelet/endothelial cell adhesion molecule                                                 | 1.613374 | 0.875054 | 0.682457 |
| leptin receptor overlapping transcript-like 1                                               | 1.287832 | 1.03866  | 0.45323  |
| SCY1-like 3 (S. cerevisiae)                                                                 | 0.946298 | 0.949781 | 1.776537 |
| nucleophosmin/nucleoplasmin, 3                                                              | 0.972176 | 1.788191 | 3.911316 |
| G protein-coupled receptor 153                                                              | 0.774318 | 0.477918 | 0.201795 |
| G protein pathway suppressor 1                                                              | 1.318893 | 0.961089 | 0.28678  |
| cysteine and glycine-rich protein 3 (cardiac LIM protein)                                   | 1.435707 | 1.363803 | 2.609453 |
| RWD domain containing 4A                                                                    | 0.956677 | 0.960118 | 0.768815 |
| dynein, light chain, roadblock-type 1                                                       | 0.56709  | 2.039509 | 1.33242  |
| paired box gene 6                                                                           | 2.60204  |          | 6.653445 |
| solute carrier family 25 (mitochondrial carrier; adenine nucleotide translocator), member 4 |          |          |          |
| gem (nuclear organelle) associated protein 5                                                | 1.108967 | 0.793901 | 1.182294 |
| elongation factor Tu GTP binding domain containing 1                                        | 0.788267 | 1.342833 | 0.271742 |
| hypermethylated in cancer 2                                                                 | 3.311151 | 2.566508 | 5.629719 |
| F-box and leucine-rich repeat protein 18                                                    | 0.731308 | 0.662712 | 2.133136 |
| PDZK1 interacting protein 1                                                                 | 1.111791 | 1.622978 | 1.317253 |
| transient receptor potential cation channel, subfamily V, member 1                          | 2.207263 | 3.175826 | 3.543737 |
| signal recognition particle 14kDa (homologous Alu RNA binding protein)                      | 1.083771 | 0.654237 | 0.572804 |
| signal recognition particle 14kDa (homologous Alu RNA binding protein)                      | 0.930063 | 0.989782 | 0.657254 |
| voltage-gated sodium channel SNS                                                            | 0.341007 | 0.944423 |          |
| Adenylate kinase 3-like 2                                                                   | 1.348581 | 1.359099 | 2.374921 |
| BTG3 associated nuclear protein                                                             | 1.447045 | 0.898363 | 0.452619 |
| hypothetical protein LOC770126                                                              | 2.139706 | 0.582517 | 1.677596 |
| phosphoglycolate phosphatase                                                                | 0.719492 | 1.011207 | 1.881206 |
| Enah/Vasp-like                                                                              | 1.257517 | 0.946387 | 0.520715 |
| Lipase, endothelial                                                                         | 0.991407 | 1.473522 | 4.59386  |
| hypothetical LOC415671                                                                      | 0.654023 | 1.066335 | 0.574919 |
| sodium channel, voltage-gated, type IX, alpha subunit                                       | 0.428806 |          |          |
| IKK interacting protein                                                                     | 3.270341 | 1.72444  | 0.919162 |
| IKK interacting protein                                                                     | 0.8058   | 1.197976 | 0.457925 |
| ATP-binding cassette, sub-family C (CFTR/MRP), member 1                                     | 4.93772  | 0.955391 |          |
| cell cycle associated protein 1                                                             | 0.946531 | 0.599806 | 0.219392 |

|                                                             |          |          |          |
|-------------------------------------------------------------|----------|----------|----------|
| interleukin 4                                               | 1.030405 | 0.76215  | 9.770724 |
| DnaJ (Hsp40) homolog, subfamily A, member 1                 | 1.289774 | 0.687084 | 0.532606 |
| DnaJ (Hsp40) homolog, subfamily A, member 1                 | 0.801016 | 0.742971 | 0.529844 |
| Immunoglobulin superfamily containing leucine-rich repeat   | 5.021068 | 2.501117 | 4.611899 |
| v-Ki-ras2 Kirsten rat sarcoma viral oncogene homolog        | 0.847934 | 1.198134 | 0.791008 |
| syntxin1B                                                   |          | 0.432149 |          |
| glutamate receptor, ionotropic, delta 2                     |          |          | 0.764619 |
| kinesin family member 2C                                    | 0.895358 | 1.065121 | 0.69155  |
| kinesin family member 2C                                    | 0.686836 | 1.462237 |          |
| kinesin family member 2C                                    | 0.770931 | 1.066996 | 0.68135  |
| NADH dehydrogenase (ubiquinone) 1 beta subcomplex, 4, 1     | 0.742829 | 0.899853 | 0.313401 |
| chromosome 7 open reading frame 26                          | 0.819247 | 0.89384  | 0.446837 |
| reticulon 4 interacting protein 1                           | 1.079135 | 0.705883 | 0.393595 |
| nuclear receptor subfamily 5, group A, member 2             | 1.422498 | 1.714791 | 2.59067  |
| nuclear receptor subfamily 5, group A, member 2             | 7.60621  |          | 1.269722 |
| CD8b molecule                                               | 0.621424 | 0.838618 | 0.106222 |
| lymphocyte antigen 96                                       | 5.027757 | 2.496606 | 2.290418 |
| HD domain containing 2                                      | 0.989534 | 1.477486 | 2.00371  |
| Salvador homolog 1 (Drosophila)                             | 0.841067 | 1.418801 | 0.411901 |
| interleukin 13 receptor, alpha 2                            | 1.237152 | 1.605677 | 4.104223 |
| CD8a molecule                                               | 0.942014 | 0.665975 | 0.277972 |
| ankyrin repeat domain 1 (cardiac muscle)                    | 1.872628 | 1.013373 | 1.580372 |
| ankyrin repeat domain 1 (cardiac muscle)                    | 2.222048 |          | 0.978494 |
| phosphofructokinase, platelet                               | 1.673122 | 1.37703  | 2.262282 |
| tetraspanin 4                                               | 2.088391 | 1.303636 | 0.562668 |
| inducible T-cell co-stimulator ligand                       |          |          | 2.281939 |
| pumilio homolog 1 (Drosophila)                              | 1.665837 | 0.646541 | 0.421427 |
| CD34 molecule                                               | 0.927384 | 0.999229 | 1.937304 |
| cAMP responsive element binding protein 3                   | 0.787209 | 1.147043 | 3.038959 |
| Hypothetical protein LOC769246                              | 0.361508 |          | 0.912827 |
| CutC copper transporter homolog (E. coli)                   | 1.887548 | 0.610818 | 0.363229 |
| Trinucleotide repeat containing 18                          | 1.781829 | 0.772516 | 0.862979 |
| transmembrane protein 121                                   | 0.253867 |          |          |
| similar to Brn1-prov protein                                | 0.74285  | 1.189643 | 0.811979 |
| prolyl 4-hydroxylase, alpha polypeptide II                  | 1.529352 | 1.554021 | 1.091862 |
| ubiquilin 4                                                 | 1.074827 | 1.619126 | 0.357718 |
| tripartite motif-containing 59                              | 0.839477 | 1.035964 | 0.487059 |
| Sjogren's syndrome nuclear autoantigen 1                    | 0.772061 | 0.885644 | 0.42093  |
| mediator of RNA polymerase II transcription, subunit 10 hor | 0.629082 | 1.711977 | 1.09448  |
| sucrase-isomaltase (alpha-glucosidase)                      | 1.108998 | 8.96381  | 1.974183 |

|                                                           |          |          |          |
|-----------------------------------------------------------|----------|----------|----------|
| RNA binding protein with multiple splicing                | 2.017465 | 2.384141 | 9.227642 |
| RNA binding protein with multiple splicing                | 4.691075 | 1.261521 | 3.947085 |
| hypothetical protein LOC770695                            | 2.473269 | 1.91543  | 1.055174 |
| microtubule-associated protein tau                        | 1.491973 | 0.691166 | 2.64928  |
| Down syndrome cell adhesion molecule                      |          |          | 4.92615  |
| sucrase-isomaltase                                        |          |          |          |
| RWD domain containing 2B                                  |          |          | 1.116259 |
| Similar to immunoglobulin-like receptor CHIR-AB1          | 0.796022 | 1.276641 | 1.197926 |
| immunoglobulin-like receptor CHIR-B3 /// similar to immun | 2.053751 | 0.525251 | 3.101414 |
| vitamin D (1,25- dihydroxyvitamin D3) receptor            | 2.548413 | 0.579776 | 1.638775 |
| hypothetical protein LOC771291                            | 1.447658 | 1.780642 | 2.366648 |
| ProSAPiP1 protein                                         | 1.043828 | 0.884216 | 4.051028 |
| claudin 10                                                | 2.234078 | 2.000184 | 1.759244 |
| mediator complex subunit 21                               | 0.943297 | 0.983589 | 0.349275 |
| UDP glucuronosyltransferase 1 family, polypeptide A1      | 1.97926  | 3.513547 | 6.325312 |
| peptidase D                                               | 1.277229 | 1.688402 | 2.790349 |
| ectonucleotide pyrophosphatase/phosphodiesterase 7        | 1.600614 | 2.053466 | 8.652059 |
| glycoprotein A33 (transmembrane)                          | 1.33909  | 3.02657  | 3.240325 |
| tubulin folding cofactor A                                | 0.423252 | 0.798867 | 0.519743 |
| Olfactomedin-like 2B                                      | 2.02086  | 1.580746 | 2.421966 |
| DAZ associated protein 1                                  | 0.946931 | 0.239727 | 1.113814 |
| mitochondrial ribosomal protein L1                        | 0.830977 | 0.77733  | 2.151592 |
| MICAL-like 2                                              | 1.125008 | 1.433787 | 3.407196 |
| GDNF family receptor alpha 1                              | 2.050159 | 1.630579 | 6.455085 |
| myeloid/lymphoid or mixed-lineage leukemia 3              | 0.589556 | 0.936686 | 1.526527 |
| WD repeat domain 77                                       | 1.319716 | 0.912309 | 1.362692 |
| programmed cell death 6                                   | 1.042585 | 0.983076 | 0.421791 |
| alkylglycerone phosphate synthase                         | 1.318985 | 1.198629 | 0.153056 |
| family with sequence similarity 125, member B             | 0.874596 | 0.938251 | 0.483826 |
| cgABP260                                                  | 1.342504 | 0.654447 | 2.297854 |
| DnaJ (Hsp40) homolog, subfamily A, member 4               | 1.22059  | 0.774965 | 0.27879  |
| DnaJ (Hsp40) homolog, subfamily A, member 4               | 1.029563 | 0.977949 | 0.148881 |
| brain protein 44-like                                     | 2.07283  | 0.852976 | 0.407274 |
| brain protein 44-like                                     | 0.90922  | 1.352318 | 0.449147 |
| chromosome 1 open reading frame 123                       | 0.053843 | 1.171074 |          |
| synaptogyrin 3                                            | 3.013721 | 0.991388 | 1.325399 |
| cytochrome P450, family 11, subfamily A, polypeptide 1    |          |          |          |
| hypothetical protein LOC769799                            | 0.544579 | 0.826347 | 0.285148 |
| cytochrome c, somatic                                     | 1.164273 | 1.46083  | 2.002783 |
| cytochrome c, somatic                                     | 0.845356 | 1.102902 | 0.441895 |

|                                                                        |          |          |          |
|------------------------------------------------------------------------|----------|----------|----------|
| lysyl oxidase-like 1                                                   | 1.247099 | 1.298048 | 2.965499 |
| Hypothetical protein LOC769360                                         |          | 2.617747 |          |
| ADP-ribosyltransferase                                                 | 5.701627 |          |          |
| ADP-ribosyltransferase /// ADP-ribosyltransferase                      | 0.722729 | 0.746591 | 0.477797 |
| chloride channel 7                                                     | 1.124324 | 0.82964  | 2.041982 |
| syntrophin, beta 1 (dystrophin-associated protein A1, 59kDa            | 2.521844 | 1.828599 | 1.276717 |
| carboxypeptidase A2 (pancreatic)                                       |          |          | 0.487731 |
| NEL-like 2 (chicken)                                                   | 1.031449 | 2.266772 | 1.346031 |
| solute carrier family 43, member 3                                     | 1.23106  | 1.122002 | 2.857275 |
| hypothetical gene supported by CR389157                                | 1.745108 | 1.735995 | 2.418241 |
| CAMP responsive element binding protein 3-like 2                       | 0.903691 | 0.942505 | 0.385485 |
| CAMP responsive element binding protein 3-like 2                       |          | 1.913945 |          |
| nemo-like kinase                                                       | 0.974676 | 1.167024 | 2.442956 |
| hydroxy-delta-5-steroid dehydrogenase, 3 beta- and steroid d           | 1.841265 | 0.290981 |          |
| uroporphyrinogen III synthase (congenital erythropoietic por           | 0.885513 | 2.039388 | 2.23233  |
| progesterone and adipoQ receptor family member VII                     |          | 1.676504 | 0.128449 |
| methyl-CpG binding domain protein 2                                    | 0.536885 | 0.968381 | 1.822586 |
| STE20-related kinase adaptor alpha                                     | 1.441624 | 1.412064 | 0.104188 |
| similar to phosphatidic acid phosphatase type 2 domain cont            | 0.923029 | 0.865468 | 0.559321 |
| similar to FLJ46266 protein                                            | 0.739969 | 0.875815 | 1.490462 |
| OAF homolog (Drosophila)                                               |          | 0.13653  |          |
| proteasome (prosome, macropain) activator subunit 3 (PA28 gamma; Ki    | 1.140769 |          | 1.478826 |
| malic enzyme 3, NADP(+)-dependent, mitochondrial                       | 0.757336 | 1.31336  | 0.424751 |
| ring finger protein 128                                                |          |          | 0.601558 |
| CDC45 cell division cycle 45-like (S. cerevisiae)                      | 0.995283 | 0.965205 | 0.550221 |
| ubiquitin-like, containing PHD and RING finger domains, 2              | 1.283183 | 1.255331 | 0.373755 |
| hypothetical LOC418426                                                 | 0.771814 | 0.90538  | 0.327981 |
| proline-rich nuclear receptor coactivator 1                            | 0.749284 | 1.057478 | 1.800942 |
| cathepsin S                                                            | 1.743456 | 1.290501 | 1.848857 |
| succinate-CoA ligase, GDP-forming, alpha subunit                       |          | 2.122162 |          |
| succinate-CoA ligase, GDP-forming, alpha subunit                       | 1.466797 | 1.234462 | 0.579014 |
| proteasome (prosome, macropain) 26S subunit, non-ATPase                | 0.621122 | 1.112742 | 1.858699 |
| hepatitis A virus cellular receptor 1                                  | 0.889729 | 1.052453 | 0.254959 |
| NIMA (never in mitosis gene a)-related kinase 6                        | 1.399306 | 1.273825 | 2.234517 |
| chromosome 20 open reading frame 54                                    | 0.805366 | 1.23618  | 1.845417 |
| GTPase activating Rap/RanGAP domain-like 3                             | 1.375882 | 1.03645  | 0.41501  |
| Mitochondrial ribosomal protein S18C                                   | 1.528739 | 0.538563 | 0.264038 |
| CDC-like kinase 4                                                      | 1.182874 | 0.759886 | 0.558081 |
| ATP synthase, H <sup>+</sup> transporting, mitochondrial F0 complex, s | 0.590199 | 1.533864 | 0.177367 |
| stearoyl-CoA desaturase 5                                              | 0.887997 | 0.803726 | 1.598183 |

|                                                                        |          |          |          |
|------------------------------------------------------------------------|----------|----------|----------|
| polycystic kidney disease 2 (autosomal dominant)                       | 0.793601 | 2.096775 | 1.216196 |
| polycystic kidney disease 2 (autosomal dominant)                       | 2.741319 | 0.952043 | 0.768462 |
| heterogeneous nuclear ribonucleoprotein A0                             | 0.774554 | 1.015342 | 0.37376  |
| v-kit Hardy-Zuckerman 4 feline sarcoma viral oncogene hon              | 0.424401 | 1.19865  | 0.593855 |
| SEC11 homolog A (S. cerevisiae)                                        | 1.849508 | 0.837214 | 0.508822 |
| transcription factor 7 (T-cell specific, HMG-box)                      | 0.487783 | 0.954827 | 0.330012 |
| dynein, axonemal, light intermediate chain 1                           | 1.236646 | 0.68545  | 0.34218  |
| bone morphogenetic protein receptor, type IB                           | 0.457193 | 0.973453 | 1.440911 |
| prostate stem cell antigen                                             | 2.175788 | 0.959722 | 1.676803 |
| serglycin                                                              | 0.999494 | 1.558973 | 3.38615  |
| similar to Kunitz-like protease inhibitor                              |          |          | 2.363156 |
| transmembrane and immunoglobulin domain containing 1                   |          | 9.208269 |          |
| hypothetical LOC419498                                                 | 1.436278 | 5.753975 | 1.332766 |
| solute carrier family 27 (fatty acid transporter), member 2            | 1.187867 |          | 35.56762 |
| thyroid hormone receptor beta 2                                        |          | 0.548815 | 2.222149 |
| 5'-nucleotidase domain containing 2                                    | 0.53944  | 0.968389 | 1.64639  |
| ATP synthase, H <sup>+</sup> transporting, mitochondrial F0 complex, s | 0.361662 | 1.107555 | 1.406008 |
| chromosome 9 open reading frame 91                                     | 1.163005 | 0.900235 | 1.901438 |
| Similar to contactin associated protein                                | 8.848162 |          | 2.003163 |
| similar to Acyl-CoA thioesterase 2                                     | 1.345762 | 1.191394 | 2.547388 |
| H3 histone, family 3A /// similar to histone protein Hist2h3c          | 0.478297 | 1.519229 | 1.007802 |
| H3 histone, family 3A /// similar to histone protein Hist2h3c          | 0.477543 | 1.103781 | 1.07579  |
| chromosome 6 open reading frame 86                                     | 0.546993 | 1.069366 | 0.590693 |
| chromosome 6 open reading frame 86                                     | 0.742181 | 0.900991 | 0.453883 |
| retinoic acid receptor responder (tazarotene induced) 2                | 1.163963 |          | 3.501111 |
| translocator protein (18kDa)                                           | 1.516035 | 1.646043 | 1.327816 |
| UBX domain containing 2                                                | 0.482637 | 0.163866 | 0.961159 |
| DnaJ (Hsp40) homolog, subfamily C, member 8                            | 0.824069 | 1.01301  | 1.194696 |
| lectin, galactoside-binding, soluble, 2                                | 0.742325 | 2.199319 | 1.579038 |
| actin binding LIM protein family, member 3                             | 3.51299  | 0.752041 | 2.350946 |
| acyl-Coenzyme A dehydrogenase, long chain                              | 1.053921 | 1.155315 | 2.168559 |
| similar to beta chain spectrin /// spectrin, beta, non-erythrocy       | 1.337837 | 0.979861 | 0.735429 |
| kinesin family member 9                                                | 3.480453 | 1.039058 | 4.27512  |
| LYR motif containing 2                                                 | 0.800813 | 0.789648 | 0.406746 |
| cytochrome P450, family 1, subfamily A, polypeptide 1                  | 2.297443 | 1.204993 | 0.905689 |
| Cytochrome c oxidase subunit VIIc                                      | 0.407055 | 1.102347 | 1.717645 |
| chromosome 12 open reading frame 31                                    | 1.088641 | 2.00184  | 0.959717 |
| SIL1 homolog, endoplasmic reticulum chaperone (S. cerevis              | 1.469266 | 1.050322 | 4.175556 |
| cytochrome P450 1A4                                                    | 0.971224 | 2.457564 |          |
| Hydroxysteroid (11-beta) dehydrogenase 1                               | 1.488173 |          | 8.62113  |

|                                                            |          |          |          |
|------------------------------------------------------------|----------|----------|----------|
| Similar to phosphoseryl-tRNA kinase                        | 0.655498 | 1.212201 | 2.382501 |
| regenerating islet-derived family, member 4                | 0.638166 | 1.883396 | 2.153437 |
| Hypothetical protein LOC770190                             | 0.747867 | 1.060298 | 0.44143  |
| ISG12-2 protein-like                                       | 2.56202  | 4.619786 | 4.073908 |
| BTB (POZ) domain containing 11                             | 1.076626 | 1.312419 | 3.089975 |
| BTB (POZ) domain containing 11                             | 1.479377 | 1.044556 | 5.758236 |
| homeobox A2                                                | 6.353515 | 0.595724 | 2.06734  |
| phospholipase A2, group IB (pancreas)                      | 0.737749 |          | 1.641643 |
| beaded filament structural protein 1, filensin             | 1.497098 | 2.522578 | 1.672022 |
| ovalbumin                                                  | 2.091467 | 1.570105 | 1.33812  |
| switch-associated protein 70                               | 0.877826 | 1.336837 | 0.448318 |
| discoidin, CUB and LCCL domain containing 2                | 1.080597 | 0.943859 | 0.530217 |
| selenium binding protein 1                                 | 1.244033 | 0.876255 | 0.48226  |
| transmembrane protein 16A                                  | 3.024439 | 8.531697 | 4.021624 |
| glycine N-methyltransferase                                | 0.845446 | 0.828984 | 0.319717 |
| Hypothetical protein LOC770490                             | 0.592561 | 1.087057 | 2.014786 |
| similar to methyltransferase 24 (37.8 kD) (3D495)          | 0.420933 | 1.532235 | 0.650104 |
| glutathione S-transferase theta 1                          | 0.707883 | 0.763022 | 0.336318 |
| stomatin                                                   | 2.256195 | 1.669738 | 2.046465 |
| phenylalanyl-tRNA synthetase, beta subunit                 | 0.914011 | 1.994033 | 0.480551 |
| pescadillo homolog 1, containing BRCT domain (zebrafish)   | 0.78176  | 1.000253 | 2.906192 |
| pescadillo homolog 1, containing BRCT domain (zebrafish)   |          |          |          |
| chromosome 16 open reading frame 57                        | 0.666301 | 1.173203 | 0.66023  |
| calcium binding protein 39-like                            | 0.572917 | 1.907986 | 3.564753 |
| calcium binding protein 39-like                            | 0.533002 | 1.551144 | 2.060562 |
| transmembrane 4 L six family member 4                      | 0.725331 | 2.87711  | 4.354819 |
| SH3 and PX domain containing 3                             | 0.885491 | 0.47214  | 0.841576 |
| phosphoribosyl pyrophosphate synthetase-associated protein | 0.82605  | 0.935422 | 0.444114 |
| hairly/enhancer-of-split related with YRPW motif 1         | 1.466795 | 1.359463 | 5.248457 |
| similar to FNDC3 protein                                   | 2.200957 | 1.155505 | 2.96942  |
| adrenergic, beta, receptor kinase 2                        | 2.497142 | 0.865585 | 0.631445 |
| angiotensin II receptor, type 1                            |          | 9.660226 |          |
| retinol binding protein 2, cellular                        | 1.745211 | 4.89546  | 20.43699 |
| translocase of inner mitochondrial membrane 17 homolog A   | 0.660106 | 1.163047 | 0.670994 |
| hypothetical LOC420860                                     | 0.539887 | 1.074037 | 1.177844 |
| EPH receptor B6                                            | 0.934066 | 1.14465  | 0.45714  |
| ring finger protein 7                                      | 0.935513 | 1.069395 | 0.428583 |
| bromodomain containing 7                                   | 1.162519 | 1.086571 | 0.519903 |
| troponin I type 1 (skeletal, slow)                         | 0.503538 |          | 1.253782 |
| deafness, autosomal dominant 5                             | 0.451233 | 1.470179 | 5.431844 |

|                                                                                        |          |          |          |
|----------------------------------------------------------------------------------------|----------|----------|----------|
| cyclin-dependent kinase inhibitor 3 (CDK2-associated dual s                            | 0.568614 | 1.179841 | 0.498152 |
| IWS1 homolog (S. cerevisiae)                                                           | 0.910797 | 1.206598 | 3.313463 |
| chromosome 7 open reading frame 30                                                     |          | 1.228249 | 0.105868 |
| glutaredoxin (thioltransferase)                                                        | 0.217603 | 0.938272 | 1.105501 |
| similar to nuclear cap binding protein subunit 2; nuclear cap                          | 0.619479 | 1.045022 | 0.300029 |
| integrin-binding sialoprotein (bone sialoprotein, bone sialoprotein II)                |          | 0.384127 |          |
| DEP domain containing 7                                                                | 0.898552 | 0.86484  | 0.292092 |
| dual specificity phosphatase 14                                                        | 0.967001 | 1.234261 | 1.508354 |
| ectonucleoside triphosphate diphosphohydrolase 8                                       | 1.432266 | 0.747928 | 2.195956 |
| BTG family, member 2                                                                   | 1.093418 | 0.678699 | 0.374723 |
| basic helix-loop-helix domain containing, class B, 8                                   | 0.505728 | 0.894119 | 0.458578 |
| Protein phosphatase 2 (formerly 2A), regulatory subunit A, t                           | 1.034079 | 0.823062 | 2.331153 |
| S100 calcium binding protein A11                                                       | 0.784489 | 1.103325 | 1.93273  |
| cathepsin C                                                                            | 2.420805 | 1.847124 | 4.265418 |
| receptor-associated protein of the synapse                                             |          |          | 1.975933 |
| mal, T-cell differentiation protein-like                                               | 1.001279 | 2.530187 | 2.654953 |
| similar to T-cell receptor gamma V2.9 /// similar to T-cell re                         | 0.935237 | 1.060276 | 0.129074 |
| chromosome 1 open reading frame 190                                                    | 1.282669 | 1.639    | 2.292075 |
| diacylglycerol kinase, epsilon 64kDa                                                   |          | 0.658214 | 0.479833 |
| ribosomal protein L38                                                                  | 0.477694 |          | 0.738334 |
| SKI-like oncogene                                                                      | 0.686192 | 0.957669 | 2.12562  |
| MTERF domain containing 1                                                              | 0.909851 | 0.726567 | 0.909462 |
| similar to Myo15b protein                                                              | 2.579018 | 3.309265 | 3.623139 |
| transmembrane protein 104                                                              |          | 0.469594 |          |
| chromosome X open reading frame 39                                                     | 2.051323 | 0.494944 | 0.060438 |
| fibroblast growth factor 1 (acidic)                                                    | 0.857972 | 2.590352 | 2.910217 |
| calpain 8                                                                              | 0.736418 | 9.037849 | 1.522102 |
| similar to chemokine CXCL13/BCA-1                                                      | 7.620164 | 3.038143 | 6.837249 |
| Gallicin 11                                                                            |          | 4.436104 |          |
| similar to inteferon-induced membrane protein Leu-13/9-27                              | 1.830237 | 1.51397  | 6.568122 |
| lysophospholipase II pseudogene 1                                                      | 0.9425   | 1.059923 | 2.52849  |
| fatty acid binding protein 2, intestinal                                               | 1.971333 | 1.84881  | 5.438075 |
| Transmembrane protein 173                                                              | 1.971216 | 1.071093 | 4.077681 |
| Fc fragment of IgE, high affinity I, receptor for; gamma poly                          | 1.928297 | 1.242552 | 3.838469 |
| tenascin XB                                                                            | 1.655481 | 1.227155 | 5.341344 |
| Kelch repeat and BTB (POZ) domain containing 8                                         | 1.294432 | 0.776152 | 0.40297  |
| G protein-coupled receptor 87                                                          | 0.296728 | 1.189473 | 0.567147 |
| sema domain, immunoglobulin domain (Ig), short basic domain, secreted, (semaphorin) 3G |          |          |          |
| forkhead box G1                                                                        | 1.491877 | 1.335815 | 2.816959 |
| ryanodine receptor 3                                                                   | 0.433566 | 1.127158 |          |



|                                                                            |          |          |          |
|----------------------------------------------------------------------------|----------|----------|----------|
| ryanodine receptor 1 (skeletal)                                            |          |          |          |
| syndecan 1                                                                 | 2.674267 | 1.667569 | 1.336423 |
| pyrimidinergic receptor P2Y, G-protein coupled, 6                          | 0.80161  | 1.53887  | 0.306592 |
| NK-lysin                                                                   | 0.626284 | 1.139161 |          |
| chromosome 1 open reading frame 66                                         | 1.003736 | 1.158976 | 2.12994  |
| purinergic receptor P2Y, G-protein coupled, 5                              | 1.304969 | 1.547856 | 2.008786 |
| similar to LOC443683 protein                                               | 1.174939 |          | 1.11076  |
| programmed cell death 1 ligand 2                                           | 0.797959 | 1.053157 | 0.438048 |
| hepatic nuclear factor 4beta                                               | 1.47755  | 1.660189 | 2.977297 |
| vasoactive intestinal peptide                                              | 0.429918 | 0.74241  | 0.599618 |
| major intrinsic protein of lens fiber                                      | 0.651909 | 2.288939 | 0.735861 |
| macrophage stimulating 1 (hepatocyte growth factor-like)                   | 1.966666 |          | 8.629267 |
| ATP-binding cassette, sub-family G (WHITE), member 1                       | 0.571692 | 0.909834 | 0.886847 |
| similar to feather keratin /// similar to feather keratin /// simil        | 0.771706 | 0.13043  | 0.887837 |
| granzyme A (granzyme 1, cytotoxic T-lymphocyte-associate                   | 3.863542 | 3.990535 | 47.08629 |
| RAD9 homolog A (S. pombe)                                                  | 1.476969 | 0.847856 | 2.237282 |
| vacuolar protein sorting 16 homolog (S. cerevisiae)                        | 0.611566 | 1.052029 | 2.572065 |
| RAB40C, member RAS oncogene family                                         | 0.710684 | 0.4139   |          |
| DEAH (Asp-Glu-Ala-Asp/His) box polypeptide 57 /// similar to DEAH          |          | 0.184769 | 0.467727 |
| GTP cyclohydrolase 1 (dopa-responsive dystonia)                            | 4.851989 | 2.297348 | 8.023099 |
| Dolichyl-diphosphooligosaccharide-protein glycosyltransfer:                | 0.754362 | 1.161082 | 2.204233 |
| KIAA1244                                                                   | 0.634892 | 0.711806 | 0.483228 |
| regulator of G-protein signalling 12                                       | 1.655735 | 12.27865 | 0.977599 |
| Gnot1 homeodomain protein                                                  | 1.27111  | 0.480428 | 0.79397  |
| solute carrier family 10 (sodium/bile acid cotransporter family), member 4 |          |          | 0.18996  |
| similar to Scale keratin (S-ker) (sKer)                                    |          | 0.403197 | 2.08614  |
| similar to Scale keratin (S-ker) (sKer)                                    |          | 0.107403 |          |
| similar to Scale keratin (S-ker) (sKer)                                    |          | 0.133067 |          |
| very low density lipoprotein receptor                                      | 2.1681   | 1.154113 | 2.006964 |
| nuclear factor I/B                                                         | 1.155676 | 0.973533 | 2.435608 |
| nuclear factor I/B                                                         | 5.892205 | 1.501609 | 1.466971 |
| kelch-like 8 (Drosophila)                                                  |          |          | 2.57554  |
| Kinesin family member C1                                                   | 0.347176 | 0.75834  | 0.726    |
| hypothetical protein LOC768701                                             | 0.994054 | 1.271766 | 1.275035 |
| neurotrophic tyrosine kinase, receptor, type 2                             | 0.244877 |          |          |
| ST6 (alpha-N-acetyl-neuraminy-2,3-beta-galactosyl-1,3)-N-                  | 6.658791 |          |          |
| proteasome (prosome, macropain) 26S subunit, ATPase, 3                     | 0.362616 | 1.519795 | 0.706768 |
| hypothetical LOC419812                                                     | 0.564241 | 1.45892  | 3.343568 |
| chromosome 2 open reading frame 43                                         | 1.131381 | 1.829526 | 0.271887 |
| CCR4-NOT transcription complex, subunit 4                                  | 2.223518 | 0.942439 | 1.805678 |

|                                                              |          |          |          |
|--------------------------------------------------------------|----------|----------|----------|
| hypothetical LOC425364 /// hypothetical LOC425625 /// hy     | 1.676621 | 0.426332 | 1.013218 |
| GLI pathogenesis-related 1                                   | 0.973138 | 1.480071 | 0.371493 |
| v-raf-1 murine leukemia viral oncogene homolog 1             | 1.584557 | 0.883087 | 0.545803 |
| solute carrier family 26, member 9                           | 1.700548 | 0.35705  |          |
| hypothetical LOC425311                                       | 0.639967 |          |          |
| similar to cytidine deaminase                                |          |          | 2.031299 |
| F-box protein 39                                             | 1.061192 | 0.787438 | 0.486814 |
| Hypothetical protein LOC776097                               | 1.072608 | 1.119428 | 0.464871 |
| roundabout, axon guidance receptor, homolog 2 (Drosophila    | 0.664869 | 3.244282 | 1.126118 |
| adenylate cyclase 7                                          | 1.154205 | 0.618102 | 2.891701 |
| metallo-beta-lactamase domain containing 2                   |          | 0.311409 |          |
| ribonuclease H1                                              |          |          | 0.036875 |
| CXXC finger 5                                                | 1.130013 | 0.104672 |          |
| GABA A receptor                                              | 2.117676 | 1.161929 | 0.573526 |
| myb-like, SWIRM and MPN domains 1                            | 1.419886 | 0.60124  | 0.380778 |
| cysteine and glycine-rich protein 1                          | 0.967514 | 1.323598 | 3.330671 |
| Dynein, axonemal, heavy chain 9                              | 1.154749 |          |          |
| EPH receptor B1                                              | 1.483891 | 1.019303 | 1.335927 |
| Similar to guanine nucleotide exchange factor Lbc            | 1.07959  | 1.638027 | 0.497607 |
| interleukin 4 receptor                                       | 1.182859 | 0.944551 | 2.077681 |
| ABI gene family, member 3                                    | 3.401904 | 1.059217 |          |
| vinculin                                                     |          |          | 1.614075 |
| similar to Hypothetical protein FLJ11506                     | 1.126367 | 0.976408 | 0.449214 |
| similar to Hypothetical protein FLJ11506                     | 0.378017 | 1.167195 | 0.976855 |
| mahogunin, ring finger 1                                     | 0.550526 | 0.923872 | 2.262094 |
| Hematological and neurological expressed 1                   | 0.774494 | 1.083047 | 0.847421 |
| hematological and neurological expressed 1                   | 0.696358 | 0.874195 | 0.396018 |
| Programmed cell death 5                                      | 9.425183 |          |          |
| thyroid hormone receptor beta                                |          | 0.268763 |          |
| Similar to KIAA1990 protein                                  | 0.932845 | 0.891148 | 2.728878 |
| NK3 homeobox 2                                               | 0.995612 | 0.437616 |          |
| troponin I type 2 (skeletal, fast)                           | 0.959079 | 1.14305  | 2.051625 |
| F-box and WD repeat domain containing 8                      | 0.655861 | 1.303137 | 4.18072  |
| similar to stem cell antigen 2                               | 2.194541 | 1.396181 | 1.115839 |
| guanine nucleotide binding protein (G protein), beta polypep | 1.195413 | 1.625501 | 3.747133 |
| leukocyte ribonuclease A-2                                   | 2.218934 | 2.271751 | 4.075813 |
| leukocyte ribonuclease A-1 /// leukocyte ribonuclease A-2    | 2.419965 | 2.216785 | 2.907348 |
| similar to cAMP-dependent protein kinase inhibitor gamma     | 2.482759 | 1.175117 | 0.910533 |
| Chondroitin polymerizing factor                              | 1.668638 | 1.045653 | 2.056805 |
| guanine deaminase /// hypothetical protein LOC770483         |          | 0.477204 | 0.555967 |

|                                                               |          |          |          |
|---------------------------------------------------------------|----------|----------|----------|
| FYVE, RhoGEF and PH domain containing 3                       | 0.928877 | 0.932312 | 0.496198 |
| v-ros UR2 sarcoma virus oncogene homolog 1 (avian)            | 1.147275 | 0.925673 | 4.476453 |
| sirtuin (silent mating type information regulation 2 homolog) | 0.708479 | 1.088672 | 1.161063 |
| leukocyte ribonuclease A-1                                    | 2.242966 | 1.507305 | 3.191123 |
| Hypothetical protein LOC769722                                | 0.878469 | 1.032027 | 0.516148 |
| Hypothetical protein LOC769722                                | 0.932205 | 0.980874 | 0.639264 |
| Hypothetical protein LOC769722                                | 0.931294 | 0.93656  | 0.647265 |
| suppressor of Ty 5 homolog (S. cerevisiae)                    | 1.018345 | 0.816793 | 2.135918 |
| suppressor of Ty 5 homolog (S. cerevisiae)                    | 0.673661 | 0.748917 | 2.54415  |
| cathepsin H                                                   | 1.18363  | 1.089878 | 1.567345 |
| similar to LOC494798 protein                                  |          | 0.92661  | 1.628146 |
| selenoprotein P, plasma, 1                                    | 0.543918 | 0.730681 | 0.622753 |
| selenoprotein P, plasma, 1                                    | 0.734425 | 0.997346 | 2.074177 |
| Deleted in malignant brain tumors 1                           | 3.654652 | 2.405131 | 2.798229 |
| MBD2-interacting zinc finger                                  | 0.616668 | 0.803629 | 1.302452 |
| progesterone receptor                                         | 2.70368  | 3.317997 | 1.378654 |
| hypothetical protein LOC776812                                | 0.808692 | 1.183848 | 3.016047 |
| tumor protein p53                                             | 3.685075 |          |          |
| SH3-domain GRB2-like endophilin B1                            | 1.237564 | 1.066668 | 0.497068 |
| immunoglobulin superfamily, member 1                          | 3.650528 | 1.89107  | 1.861073 |
| signal-induced proliferation-associated 1 like 1              | 0.660281 | 0.851405 | 0.357515 |
| nuclear factor I-X protein                                    | 1.284601 | 1.184881 | 1.522645 |
| peptidylprolyl isomerase H (cyclophilin H)                    | 0.786296 | 1.203948 | 0.401664 |
| Forkhead box K2                                               | 1.299264 | 0.957011 | 0.733132 |
| nuclear factor I/C (CCAAT-binding transcription factor)       | 3.943064 | 0.97188  | 1.172236 |
| nuclear factor I/C (CCAAT-binding transcription factor)       | 1.627059 | 1.428045 |          |
| son of sevenless homolog 2 (Drosophila)                       | 1.694534 | 1.165493 | 0.82318  |
| hypothetical LOC420010                                        | 1.676277 | 1.495601 | 2.480044 |
| Cytoskeleton associated protein 5                             | 1.068616 | 1.245763 | 0.680304 |
| transmembrane protein 22                                      | 0.556833 | 1.582218 | 0.407855 |
| nuclear factor I/B                                            | 0.879692 | 1.218346 | 1.885854 |
| family with sequence similarity 120A                          | 1.869381 | 0.90636  | 0.634384 |
| platelet-derived growth factor beta polypeptide (simian sarcc | 1.200055 | 0.990902 | 3.318239 |
| nuclear factor I/A                                            | 2.582238 | 1.085413 | 1.404352 |
| nuclear factor I/A                                            | 6.385803 | 1.576672 | 0.717784 |
| similar to macrophage inflammatory protein-2                  | 16.30568 | 3.510748 | 7.923984 |
| U-box domain containing 5                                     | 0.442695 | 0.959451 |          |
| cysteine-rich PDZ-binding protein                             | 1.338665 | 1.342217 | 0.40807  |
| inositol polyphosphate-5-phosphatase K                        | 0.91709  | 0.96947  | 0.711798 |
| tenascin R (restrictin, janusin)                              |          |          | 4.565133 |

|                                                          |          |          |          |
|----------------------------------------------------------|----------|----------|----------|
| angiotensin II receptor-associated protein               | 0.955149 | 1.120959 | 0.472563 |
| ligatin                                                  | 0.450995 | 1.222243 | 0.578304 |
| methyltransferase like 9                                 | 0.66633  | 1.124697 | 0.44011  |
| lysozyme (renal amyloidosis)                             | 2.821059 | 1.468645 | 0.594182 |
| oxysterol binding protein-like 10                        | 0.827404 | 0.889076 | 0.451465 |
| Chromosome 14 open reading frame 32                      | 1.313665 | 0.876587 | 0.463499 |
| formin 1                                                 | 1.14551  | 1.220288 | 0.724203 |
| FXD domain containing ion transport regulator 6          | 0.829382 | 0.695177 | 1.689172 |
| chromosome 19 open reading frame 28                      | 0.534447 | 0.843872 | 0.276137 |
| intraflagellar transport 172 homolog (Chlamydomonas)     | 0.792931 | 1.21002  | 3.444523 |
| phospholipase C, gamma 2 (phosphatidylinositol-specific) | 0.532492 | 1.149308 | 4.004355 |
| leupaxin                                                 | 0.868076 | 0.89494  | 0.306536 |
| lamin A                                                  | 1.419554 | 0.226281 | 2.497593 |
| similar to DNA replication initiator protein             | 0.728482 | 1.193267 | 0.760726 |
| mitochondrial trans-2-enoyl-CoA reductase                | 1.492623 | 0.98837  | 2.284103 |
| dystrophin                                               | 1.369737 | 1.272879 | 0.776996 |
| dystrophin                                               | 2.268413 | 1.028915 | 0.650953 |
| dystrophin                                               | 2.818693 |          |          |
| BUB1 budding uninhibited by benzimidazoles 1 homolog (y  | 0.738454 | 1.073051 | 0.604683 |
| 3'(2'), 5'-bisphosphate nucleotidase 1                   | 0.713827 | 0.922044 | 0.366361 |
| 3'(2'), 5'-bisphosphate nucleotidase 1                   | 0.834927 | 1.07589  | 0.21738  |
| spermatogenesis associated 13                            | 0.8054   | 1.180534 |          |
| similar to Cytochrome P450 4A2 precursor (CYPIVA2) (Lau  | 1.501171 | 1.466588 | 3.214292 |
| catechol-O-methyltransferase                             |          | 0.716865 | 0.328197 |
| calpain 3, (p94)                                         | 1.146174 | 1.480777 | 1.231303 |
| peroxisomal membrane protein 4, 24kDa                    | 0.91452  | 0.998828 | 0.420299 |
| serine/threonine kinase 10                               | 1.728407 | 1.577583 | 2.636814 |
| hypothetical protein LOC769044                           | 1.921456 | 2.479096 | 2.47362  |
| v-myb myeloblastosis viral oncogene homolog (avian)      | 0.904834 | 0.869527 | 0.214672 |
| zona pellucida glycoprotein 3 (sperm receptor)           | 1.886965 |          | 0.163413 |
| transmembrane BAX inhibitor motif containing 1           | 1.175536 | 0.896554 | 2.097132 |
| similar to Ephx1 protein                                 | 1.147565 | 1.374633 | 2.337817 |
| CGI-146 protein                                          | 1.413643 | 1.414658 | 2.01549  |
| cKrl protein                                             | 1.101516 | 1.035949 | 1.058749 |
| adaptor-related protein complex 1, gamma 1 subunit       |          | 3.297553 |          |
| nuclear receptor binding protein 1                       | 1.108491 | 0.840013 | 2.189018 |
| hypothetical gene supported by CR387739                  | 1.138032 |          | 2.532934 |
| carboxymethylenebutenolidase homolog (Pseudomonas)       | 3.996085 | 1.922709 | 0.927757 |
| CD28 molecule                                            | 0.721533 | 0.895602 | 0.245355 |
| similar to ovary-specific acidic protein                 | 0.362856 | 0.830516 | 0.170962 |

|                                                             |          |          |          |
|-------------------------------------------------------------|----------|----------|----------|
| SRY (sex determining region Y)-box 17                       | 1.717021 | 1.233974 | 3.931103 |
| dehydrogenase/reductase (SDR family) member 3               | 1.093114 | 1.033405 | 3.739194 |
| Hypothetical LOC425086                                      | 0.765491 | 1.26606  | 2.774106 |
| homeobox D4                                                 |          |          |          |
| phospholipid transfer protein                               | 0.703707 | 1.395802 | 2.013381 |
| hypothetical LOC428693                                      | 1.177922 | 0.748327 | 0.401382 |
| Hypothetical LOC426184                                      | 5.115493 |          | 3.550704 |
| cAMP responsive element binding protein 3-like 3            |          | 1.686905 | 2.464799 |
| Mitochondrial ribosomal protein S12                         | 0.662492 | 1.262708 | 1.614559 |
| Similar to NAD(P)H dehydrogenase, quinone 1                 | 0.487406 | 1.111028 | 0.617613 |
| SEC14-like 2 (S. cerevisiae)                                | 1.794037 | 2.035521 | 0.731356 |
| hypothetical protein LOC769608                              | 0.854451 | 0.992354 | 1.316807 |
| cell division cycle 2, G1 to S and G2 to M                  | 0.660164 | 1.229442 | 0.533325 |
| Scavenger receptor class F, member 1                        | 1.460893 | 1.312613 | 1.367167 |
| mitochondrial ribosome recycling factor                     | 1.174986 | 0.771171 | 2.760967 |
| mitochondrial ribosome recycling factor                     | 1.187908 | 1.21456  | 3.078192 |
| chromosome 7 open reading frame 55                          | 0.6001   | 1.132978 | 1.655921 |
| WD repeat domain 13                                         | 2.208559 | 1.403431 | 1.065283 |
| similar to isocitrate dehydrogenase 2 (NADP+), mitochondri  | 0.659481 | 1.117482 | 0.321627 |
| membrane protein, palmitoylated 1, 55kDa                    | 0.988226 | 0.944519 | 2.236164 |
| motile sperm domain containing 1                            | 2.337653 | 0.984021 | 0.398389 |
| phosphatidylinositol glycan anchor biosynthesis, class C    | 0.504682 | 1.040008 | 2.83234  |
| Solute carrier family 25, member 29                         | 2.777598 | 1.031899 | 3.264323 |
| F-box and leucine-rich repeat protein 21                    | 2.723504 | 0.714582 | 0.578363 |
| F-box and leucine-rich repeat protein 21                    | 0.5818   | 1.241657 | 1.46756  |
| chromosome 20 open reading frame 116                        | 0.84315  | 1.25291  | 2.529242 |
| similar to feather keratin                                  |          | 0.287045 |          |
| mature avidin                                               | 18.48336 | 20.68621 | 208.2145 |
| interferon gamma receptor 2 (interferon gamma transducer 1  | 1.396179 | 1.411081 | 1.167912 |
| complement component 1, q subcomponent, A chain             | 2.012853 | 1.739779 | 3.26899  |
| similar to Potassium channel modulatory factor 1            | 9.747985 | 1.701651 | 0.229502 |
| protein kinase, AMP-activated, beta 1 non-catalytic subunit |          |          |          |
| glial fibrillary acidic protein                             | 0.511355 | 1.452444 | 0.768652 |
| hypothetical LOC426622                                      | 0.705199 | 1.256842 | 0.494509 |
| hypothetical LOC426622                                      | 0.807541 | 0.890927 | 0.429664 |
| thioredoxin reductase 3                                     |          | 1.452173 | 0.281942 |
| thioredoxin reductase 3                                     | 0.460573 | 1.107562 | 0.46075  |
| ADP-ribosylation factor GTPase activating protein 3         | 0.117766 | 3.978085 | 2.414196 |
| retinoic acid induced 2                                     | 0.909039 | 1.586982 |          |
| Single-stranded DNA binding protein 2                       | 1.082096 | 0.77189  | 0.234826 |

|                                                           |          |          |          |
|-----------------------------------------------------------|----------|----------|----------|
| single-stranded DNA binding protein 2                     | 0.734588 | 1.002451 | 0.102149 |
| sarcalumenin                                              | 1.174736 | 0.815864 | 2.097891 |
| chromosome 6 open reading frame 161                       | 0.69848  | 1.129261 | 0.480642 |
| IKAROS family zinc finger 2 (Helios)                      | 1.113911 | 0.931283 | 0.358665 |
| MIS12, MIND kinetochore complex component, homolog (y     | 0.749133 | 1.221603 | 0.548183 |
| Pantothenate kinase 3                                     | 2.104469 | 0.997737 | 0.969652 |
| hypothetical protein LOC769609                            | 0.874166 | 0.876718 | 0.938514 |
| nonhomologous end-joining factor 1                        | 0.835822 | 2.351699 |          |
| NADH dehydrogenase (ubiquinone) 1 beta subcomplex, 3, 1   | 0.995403 | 0.409754 | 0.376202 |
| RNA binding motif protein 41                              | 0.636871 | 0.893904 | 1.315504 |
| ELOVL family member 6, elongation of long chain fatty aci | 0.819118 | 1.079045 | 2.038777 |
| goosecoid homeobox                                        | 2.842149 | 6.404926 | 2.701925 |
| WDR45-like                                                | 1.061071 | 1.724927 | 0.273009 |
| nucleolar protein with MIF4G domain 1                     | 1.412353 | 1.259231 | 0.599014 |
| torsin family 1, member A (torsin A)                      | 1.070615 | 1.340105 | 0.467    |
| quiescence-specific protein                               | 1.759008 | 1.006658 | 1.383564 |
| chromosome 11 open reading frame 77                       | 0.816912 | 1.625036 | 2.061126 |
| Chromosome 9 open reading frame 167                       | 1.405248 | 1.081837 | 1.775432 |
| LIM domain only 2 (rhombotin-like 1)                      | 2.837635 | 1.454736 | 3.433939 |
| S100 calcium binding protein A9                           |          |          | 2.266534 |
| similar to MGC69149 protein                               | 2.207726 | 1.454884 | 2.260773 |
| Tripeptidyl peptidase I                                   | 0.807341 | 0.956273 | 2.596825 |
| somatostatin                                              | 1.756941 | 1.629714 | 6.367144 |
| synaptojanin 2                                            | 1.201755 | 2.016149 | 1.870738 |
| Annexin A8-like 1                                         | 0.724715 | 1.015198 | 0.425531 |
| cardiomyopathy associated 5                               |          |          | 2.848339 |
| synaptotagmin XI                                          | 0.904727 | 1.249589 | 2.742459 |
| oxysterol binding protein-like 1A                         | 3.553625 | 2.789949 | 1.367228 |
| teashirt family zinc finger 2                             | 1.875565 | 2.344001 | 1.314704 |
| prostaglandin E receptor 3 (subtype EP3)                  | 0.727303 | 1.10234  | 1.514299 |
| similar to type I hair keratin KA31                       | 0.37826  | 0.757926 | 0.133058 |
| similar to type I hair keratin KA31                       |          | 0.326359 | 0.742412 |
| similar to type I hair keratin KA31                       | 0.440645 | 0.816089 | 0.069172 |
| mediator complex subunit 24                               | 0.717072 | 1.077573 | 1.763895 |
| apical protein 2                                          | 0.491784 | 1.667699 | 0.683111 |
| chromosome 9 open reading frame 151                       | 0.579691 | 1.076592 | 1.891941 |
| Chromosome 9 open reading frame 151                       | 0.704111 | 0.552703 | 1.385983 |
| family with sequence similarity 123A                      | 0.627485 | 1.100167 | 2.4344   |
| PDZ and LIM domain 4                                      | 0.8225   | 0.84588  | 0.657801 |
| PERP, TP53 apoptosis effector                             | 0.814698 | 1.361165 | 0.245098 |

|                                                                        |          |          |          |
|------------------------------------------------------------------------|----------|----------|----------|
| heparan sulfate proteoglycan 2                                         | 1.069537 | 1.119972 | 3.025067 |
| heparan sulfate proteoglycan 2                                         | 2.938134 | 0.74178  | 1.990742 |
| transmembrane protein 108                                              | 0.952155 | 1.051237 | 0.592153 |
| mutS homolog 6 (E. coli)                                               | 0.924627 | 1.128163 | 0.521432 |
| SET domain containing 4                                                | 3.747595 | 1.036325 | 2.069154 |
| plastin 1 (I isoform)                                                  | 0.458284 | 0.95927  | 0.432703 |
| RAS-like, family 11, member B                                          | 0.708522 | 0.595184 | 0.469977 |
| general transcription factor IIH, polypeptide 4, 52kDa                 | 1.126414 | 0.962586 | 2.162674 |
| myogenic differentiation 1                                             | 1.784265 | 0.917001 | 4.131697 |
| similar to p150 target of rapamycin (TOR)-scaffold protein c           | 2.218724 | 1.124424 | 1.100305 |
| beta-1,4-galactosyltransferase                                         |          |          |          |
| carbamoyl-phosphate synthetase 2, aspartate transcarbamyla             | 0.827749 | 1.152407 | 3.323085 |
| carbamoyl-phosphate synthetase 2, aspartate transcarbamylase, and dihy |          | 1.053941 | 3.169876 |
| FUS interacting protein (serine/arginine-rich) 1                       | 1.005841 | 0.950471 | 0.624971 |
| T-cell acute lymphocytic leukemia 1                                    | 0.565709 | 1.22606  | 1.755436 |
| Kruppel-like factor 2 (lung)                                           | 2.009831 | 1.587864 | 1.398614 |
| Nuclear protein, ataxia-telangiectasia locus                           | 1.546977 | 0.930838 | 0.597262 |
| nuclear receptor binding SET domain protein 1                          | 1.020411 | 0.925941 | 1.696474 |
| MORN repeat containing 2                                               | 1.074206 | 0.505473 | 26.26952 |
| WNT1 inducible signaling pathway protein 1                             | 1.010311 | 0.843258 | 1.478377 |
| similar to Chymotrypsin inhibitor (DPCI)                               | 1.044568 |          | 2.526408 |
| ankyrin 2, neuronal                                                    |          |          | 0.303178 |
| Hypothetical protein LOC770202                                         | 0.646543 | 0.965774 | 0.707324 |
| hypothetical LOC424918                                                 | 1.466673 | 2.270203 |          |
| small nuclear ribonucleoprotein polypeptide A'                         | 0.946991 | 0.690947 | 3.4436   |
| kelch-like 18 (Drosophila)                                             | 1.788795 | 0.897842 | 2.062048 |
| gamma-glutamyltransferase-like 3                                       | 1.131167 | 1.600253 | 1.165789 |
| insulin-like growth factor binding protein 2, 36kDa                    | 2.068699 | 1.17288  | 1.174934 |
| similar to Maltase-glucoamylase (alpha-glucosidase)                    | 0.613106 | 3.171021 | 5.427752 |
| Similar to Im:7137941 protein                                          | 1.36318  |          | 0.75748  |
| phospholipid scramblase 1                                              | 2.048191 | 1.472475 | 1.939562 |
| phospholipid scramblase 1                                              | 2.698575 | 1.411904 | 2.022357 |
| Pleckstrin homology, Sec7 and coiled-coil domains 3                    | 1.202053 | 0.86872  | 0.465067 |
| component of oligomeric golgi complex 7                                | 1.447812 | 0.863799 | 0.768578 |
| chromosome 11 open reading frame 54                                    | 0.764001 | 1.026988 | 0.383287 |
| chromosome 6 open reading frame 129                                    | 0.628128 | 0.961253 | 0.591325 |
| myosin IXA                                                             | 2.872065 | 0.571735 | 3.637131 |
| chromosome 8 open reading frame 80                                     | 3.502652 | 2.010985 | 3.970815 |
| activin A receptor, type IIB                                           |          | 6.678993 |          |
| similar to 6.8 kDa mitochondrial proteolipid                           | 0.829415 | 1.351337 | 0.096895 |

|                                                          |          |          |          |
|----------------------------------------------------------|----------|----------|----------|
| glycogen synthase kinase 3 beta                          | 0.823267 | 0.971819 | 1.803991 |
| proline rich 6                                           | 0.466329 | 1.790475 | 1.088838 |
| adenylosuccinate synthase                                | 1.120489 | 1.438943 | 0.488475 |
| sema domain, immunoglobulin domain (Ig), transmembrane   | 0.822397 | 0.85316  | 1.236094 |
| SAPS domain family, member 3                             | 0.146629 | 4.417114 | 3.489949 |
| chromosome 9 open reading frame 18                       |          | 0.74816  |          |
| c-myc binding protein                                    | 0.888047 | 0.433137 | 0.471895 |
| similar to RIKEN cDNA A930008G19 gene                    | 1.279992 | 1.385632 | 2.146529 |
| G-protein signaling modulator 2 (AGS3-like, C. elegans)  | 1.060519 | 0.967627 | 0.667974 |
| anaphase promoting complex subunit 2                     | 0.820521 | 0.926583 | 1.585251 |
| chromosome 20 open reading frame 72                      | 0.869171 | 1.043416 | 0.509698 |
| calcium/calmodulin-dependent serine protein kinase (MAGU | 1.19534  | 0.399463 |          |
| calcium/calmodulin-dependent serine protein kinase (MAGU | 1.123126 | 0.624616 | 0.400302 |
| transgelin 3                                             | 1.6693   | 0.975647 | 2.398129 |
| hypothetical LOC423257                                   | 0.832696 | 1.240541 | 0.6768   |
| monoamine oxidase A                                      | 2.830139 | 1.867308 | 4.435587 |
| Hypothetical LOC415966                                   | 0.488527 | 1.099309 | 0.29663  |
| villin-like                                              | 1.020888 | 1.400703 | 2.328156 |
| similar to PINCH protein                                 | 2.486926 | 0.31645  | 0.755261 |
| Arylsulfatase family, member I                           | 0.47362  | 0.650051 | 0.990195 |
| Ectonucleoside triphosphate diphosphohydrolase 7         | 1.322238 | 1.269949 | 2.179662 |
| deoxynucleotidyltransferase, terminal                    | 0.591973 | 0.471255 | 0.414993 |
| pentatricopeptide repeat domain 1                        | 0.99387  | 0.859447 | 0.793067 |
| mitochondrial ribosomal protein L33                      | 0.647654 | 0.436314 |          |
| oxysterol binding protein-like 10                        | 0.905626 | 1.195923 | 2.117384 |
| calcium-binding protein                                  | 1.03326  | 1.255504 | 0.937851 |
| hypothetical LOC422459                                   | 0.820555 | 1.312259 | 2.042696 |
| hypothetical protein LOC770248                           | 0.76921  | 1.857063 | 0.373613 |
| Unc-50 homolog (C. elegans)                              | 1.049522 | 0.699442 | 0.773131 |
| chaperonin containing TCP1, subunit 2 (beta)             | 0.98893  | 1.109494 | 0.477301 |
| similar to human phosphotyrosine phosphatase kappa       | 0.787799 | 0.766365 | 2.017934 |
| similar to LOC446287 protein                             | 2.228105 | 0.863805 | 3.467716 |
| TM2 domain containing 2                                  | 1.317103 | 0.550767 | 0.391058 |
| hypothetical LOC396357                                   | 2.030411 | 0.518496 | 1.956335 |
| chromosome 4 open reading frame 8                        |          |          | 0.276118 |
| ADAM metallopeptidase with thrombospondin type 1 motif,  | 0.894493 | 1.512392 | 0.95414  |
| nuclear receptor subfamily 0, group B, member 2          | 1.794227 | 0.451673 | 1.384576 |
| acyl-CoA synthetase bubbligum family member 2            | 0.738129 | 1.187244 | 1.757253 |
| inhibitor of growth family, member 4                     | 1.142649 | 0.780287 | 0.785281 |
| islet amyloid polypeptide                                | 0.805673 | 1.118638 | 0.905159 |



|                                                                |          |          |          |
|----------------------------------------------------------------|----------|----------|----------|
| similar to very large inducible GTPase-1                       | 8.38246  | 2.568482 | 9.438594 |
| coiled-coil domain containing 28A                              | 1.305947 | 0.877801 | 0.371846 |
| coiled-coil domain containing 28A                              | 1.088931 | 0.558834 | 0.331585 |
| chromosome 6 open reading frame 89                             | 0.644643 | 0.708506 | 0.498852 |
| Milk fat globule-EGF factor 8 protein                          | 1.549078 | 1.485449 | 7.578666 |
| Hypothetical protein LOC771069                                 | 0.528656 | 1.836183 | 2.495391 |
| non-metastatic cells 6, protein expressed in (nucleoside-diph  | 1.242551 | 1.044123 | 0.476242 |
| origin recognition complex, subunit 6 like (yeast)             | 0.964913 | 1.053238 | 1.212944 |
| origin recognition complex, subunit 6 like (yeast)             | 1.036149 | 1.219097 | 0.287077 |
| similar to aldose reductase                                    | 1.135402 | 1.039201 | 1.623191 |
| nasal embryonic LHRH factor                                    | 6.918679 | 0.605266 | 2.931586 |
| intersectin 2                                                  | 0.607217 | 0.849015 | 2.682951 |
| similar to Ppp4r1-prov protein                                 | 1.399279 | 1.00564  | 0.658858 |
| chromosome 15 open reading frame 48                            | 2.116995 | 1.827715 | 3.289798 |
| coiled-coil domain containing 12                               | 0.927683 | 1.074585 | 0.478308 |
| kelch-like 8 (Drosophila)                                      | 1.112766 | 1.114405 | 0.825233 |
| colony stimulating factor 2 receptor, alpha, low-affinity (gra | 1.395501 | 1.436475 | 3.843498 |
| protein tyrosine phosphatase, receptor type, S                 | 0.475913 | 0.747516 | 0.573781 |
| mannan-binding lectin serine peptidase 1 (C4/C2 activating c   | 0.739628 | 2.566619 | 1.379272 |
| Arrestin domain containing 2                                   | 1.38775  | 1.005761 | 3.16631  |
| synaptophysin-like 1                                           | 1.17849  | 2.553278 | 8.636956 |
| hypothetical protein LOC769446                                 | 1.239002 | 0.735362 | 0.24575  |
| glyoxalase I                                                   | 1.122938 | 1.331645 | 0.061529 |
| BMP binding endothelial regulator                              |          | 1.536643 | 2.107827 |
| exportin 6                                                     | 0.457362 | 0.754597 | 2.886944 |
| interleukin-1 receptor-associated kinase 2                     | 1.643329 | 0.995576 | 0.495766 |
| cofilin 2 (muscle)                                             | 1.663128 | 0.776807 | 2.225127 |
| phosphatidylinositol glycan anchor biosynthesis, class L       | 1.581072 | 1.452021 | 1.452423 |
| peroxisome biogenesis factor 10                                | 0.63521  | 1.053027 | 0.32897  |
| peroxisome biogenesis factor 10                                | 1.092803 | 0.762964 | 0.180708 |
| glutathione transferase                                        | 0.981903 | 1.810814 | 2.229885 |
| B-cell CLL/lymphoma 9                                          | 2.999128 | 1.168417 | 1.688996 |
| polymerase (RNA) II (DNA directed) polypeptide E, 25kDa        | 0.735534 | 0.958143 | 0.479843 |
| mutS homolog 4 (E. coli)                                       | 1.689678 | 0.794936 | 0.442401 |
| C1q and tumor necrosis factor related protein 2                | 1.025461 | 1.207458 | 1.058709 |
| secreted frizzled-related protein 4                            | 0.438373 | 0.090162 |          |
| similar to ribosomal protein L23A                              | 0.40646  | 0.661902 | 0.456485 |
| leucine rich repeat and sterile alpha motif containing 1       | 0.288187 | 0.391284 | 0.837263 |
| domesticus (clone 1.6 kB) islet-2                              | 2.100044 | 0.933841 | 1.561401 |
| fin bud initiation factor homolog (zebrafish)                  | 0.668877 | 2.152591 | 3.51669  |

|                                                                  |          |          |          |
|------------------------------------------------------------------|----------|----------|----------|
| Boc homolog (mouse)                                              | 0.496735 | 0.716746 | 0.384558 |
| leucine rich repeat containing 16A                               | 2.085301 | 1.111413 | 1.878364 |
| Chromosome 16 open reading frame 61                              |          | 2.929699 | 0.780767 |
| Chromosome 16 open reading frame 61                              | 0.962168 | 1.114137 | 0.489406 |
| interferon regulatory factor 1                                   | 2.963294 | 1.547715 | 2.323075 |
| GRAM domain containing 2                                         | 1.664309 | 1.059267 | 0.598267 |
| Similar to 1600002O04Rik protein                                 | 2.454808 | 2.342421 | 1.799491 |
| Similar to 1600002O04Rik protein                                 | 1.555553 | 1.604301 | 2.463152 |
| chromosome 11 open reading frame 52                              | 0.559145 | 1.117944 | 4.26904  |
| cytoskeleton associated protein 5                                | 0.604439 | 1.674178 | 2.545687 |
| cytoskeleton associated protein 5                                | 2.005532 | 1.16282  | 0.769541 |
| family with sequence similarity 108, member C1                   | 1.508804 | 1.149524 | 0.706554 |
| ring finger protein 34                                           | 0.991691 | 0.951177 | 2.30052  |
| acetylcholinesterase                                             |          | 0.275943 |          |
| ATG12 autophagy related 12 homolog (S. cerevisiae)               | 0.52648  | 1.133285 | 1.266849 |
| WWC family member 3                                              | 1.810687 | 1.115991 | 2.511958 |
| CDP-diacylglycerol synthase (phosphatidate cytidyltransferase)   | 0.910549 | 1.165409 | 1.845618 |
| Sterile alpha motif domain containing 4A                         | 2.002891 | 0.840687 | 1.222648 |
| GATA binding protein 4                                           |          | 0.375793 |          |
| Ribosomal protein L27a                                           | 1.070007 | 0.720434 | 0.233015 |
| solute carrier family 14 (urea transporter), member 2            | 1.887711 | 1.443279 | 0.867014 |
| wingless-type MMTV integration site family, member 5B            | 1.127389 |          | 2.117358 |
| chromosome 1 open reading frame 128                              | 0.657673 | 0.925457 | 1.401408 |
| ring finger protein 4                                            | 1.5113   | 0.9234   | 0.205376 |
| similar to Prt1 homolog                                          | 0.677828 | 1.103187 | 0.732204 |
| chromosome 20 open reading frame 177                             | 1.254268 | 0.912332 | 0.236743 |
| chromosome 20 open reading frame 177                             | 0.973135 | 0.934534 | 0.513751 |
| ATP synthase mitochondrial F1 complex assembly factor 1          | 0.932238 | 0.919133 | 0.51177  |
| ATP synthase mitochondrial F1 complex assembly factor 1          | 0.717049 | 0.896885 | 0.388332 |
| ATP synthase mitochondrial F1 complex assembly factor 1          | 0.729519 | 2.746413 | 1.017528 |
| chromosome 2 open reading frame 33                               | 1.848456 | 0.775783 | 1.262409 |
| chromosome 20 open reading frame 30                              | 1.034282 | 1.157904 | 0.349839 |
| phosphatidylethanolamine N-methyltransferase                     | 0.473663 | 0.937581 | 1.568984 |
| phosphatidylethanolamine N-methyltransferase                     | 0.604205 | 1.002454 | 0.342236 |
| interferon                                                       |          |          |          |
| chromosome 5 open reading frame 32                               | 1.301194 | 1.165219 | 1.564542 |
| IMP1 inner mitochondrial membrane peptidase-like (S. cerevisiae) | 1.104229 | 0.791751 | 0.897687 |
| tissue factor pathway inhibitor 2                                | 1.511668 | 1.56038  | 3.094491 |
| chromosome 6 open reading frame 154                              | 2.158325 | 1.716475 | 1.668007 |
| replication factor C (activator 1) 4, 37kDa                      | 0.975865 | 2.279025 | 1.235626 |

|                                                                                       |          |          |          |
|---------------------------------------------------------------------------------------|----------|----------|----------|
| transforming growth factor, beta receptor III                                         | 0.886623 | 0.378096 |          |
| chromosome 6 open reading frame 32                                                    | 2.255476 | 1.786693 | 3.058107 |
| LYR motif containing 5                                                                | 0.752536 | 1.181812 | 0.299642 |
| EPH receptor A3                                                                       | 1.68457  | 1.25844  | 2.196478 |
| HscB iron-sulfur cluster co-chaperone homolog (E. coli)                               | 0.780248 | 1.470888 | 0.339839 |
| ADP-ribosylation factor-like 6 interacting protein 1                                  | 1.037153 | 1.085819 |          |
| mannosyl (alpha-1,3-)-glycoprotein beta-1,4-N-acetylglucosyl transferase              | 1.213221 | 1.577051 | 2.90423  |
| mannosyl (alpha-1,3-)-glycoprotein beta-1,4-N-acetylglucosyl transferase              | 1.698248 | 1.407419 | 2.197137 |
| guanine nucleotide binding protein (G protein), alpha activating activity polypeptide |          |          | 0.016855 |
| growth arrest-specific 6                                                              | 0.836455 | 1.217912 | 2.693595 |
| folliculin-like 4                                                                     | 0.759585 | 1.633026 | 0.322864 |
| CASP8 associated protein 2                                                            | 1.151866 | 1.001552 | 0.979484 |
| Kruppel-like factor 1 (erythroid)                                                     | 0.808072 | 1.069892 | 1.7353   |
| TAF3 RNA polymerase II, TATA box binding protein (TBP)-associated factor              |          | 0.475853 |          |
| Translocase of outer mitochondrial membrane 7 homolog (yeast)                         | 0.746458 |          | 0.070764 |
| hypothetical gene supported by CR389297                                               | 0.658575 | 0.997798 | 0.434612 |
| ariadne homolog 2 (Drosophila)                                                        |          |          |          |
| ariadne homolog 2 (Drosophila)                                                        | 2.173856 | 0.513373 | 1.415016 |
| hemopoietic cell kinase                                                               | 3.867596 | 1.375688 | 4.429757 |
| KIAA0020                                                                              | 0.62586  | 1.113216 | 2.104642 |
| solute carrier family 46, member 3                                                    | 1.016461 | 0.681755 | 0.126432 |
| Heat shock transcription factor 1                                                     | 0.831351 | 0.673371 | 1.86149  |
| musculoskeletal, embryonic nuclear protein 1                                          | 1.304485 | 1.116151 | 2.771473 |
| gap junction protein, beta 1, 32kDa                                                   | 0.760122 | 0.67291  | 1.675682 |
| pseudouridylate synthase 7 homolog (S. cerevisiae)                                    | 0.972347 | 1.089127 | 2.198935 |
| similar to hypothetical protein 4933429F08                                            | 1.762754 | 6.835208 |          |
| hypothetical protein LOC770818                                                        | 0.798392 | 2.300165 | 5.797689 |
| intestinal zipper protein                                                             | 5.452234 | 1.837004 | 0.239058 |
| intestinal zipper protein                                                             | 1.03864  | 3.707    | 0.544204 |
| Chromosome 10 open reading frame 65                                                   |          | 0.439724 |          |
| kelch domain containing 4                                                             | 1.106083 | 1.053402 | 1.804721 |
| coenzyme Q10 homolog B (S. cerevisiae)                                                | 0.85071  | 0.856906 | 1.633967 |
| E74-like factor 3 (ets domain transcription factor, epithelial-specific)              | 1.245626 | 1.050282 | 1.558066 |
| hypothetical gene supported by CR385622                                               |          |          |          |
| fibroblast growth factor binding protein 1                                            | 1.284189 | 2.857923 | 1.291526 |
| envoplakin                                                                            | 0.541944 | 1.010993 | 0.411713 |
| family with sequence similarity 70, member A                                          | 0.66563  | 0.463293 | 0.669575 |
| integrin, alpha V (vitronectin receptor, alpha polypeptide, an                        | 1.572453 | 0.846966 | 0.439646 |
| RAB17, member RAS oncogene family                                                     | 0.977831 | 4.792392 | 1.400736 |
| androgen receptor                                                                     |          |          | 2.341787 |

|                                                                           |          |          |          |
|---------------------------------------------------------------------------|----------|----------|----------|
| similar to LOC495234 protein                                              |          | 0.939807 | 0.061199 |
| villin 1                                                                  | 1.357554 | 0.826143 | 1.67895  |
| aspartylglucosaminidase                                                   | 1.276971 | 0.913226 | 0.421257 |
| similar to Ras-related protein Rab-10                                     | 2.42179  | 1.931503 | 1.158965 |
| similar to Ras-related protein Rab-10                                     | 4.010339 | 1.050137 | 0.41711  |
| chromosome 11 open reading frame 34                                       | 1.268636 | 2.109211 | 1.728262 |
| RAB20, member RAS oncogene family                                         | 2.419436 | 1.732896 | 4.73639  |
| Chromosome 16 open reading frame 14                                       | 1.226879 | 1.881298 | 3.864426 |
| influenza virus NS1A binding protein                                      | 1.475456 | 0.87154  | 0.502869 |
| tubulin, beta 1                                                           | 0.815373 | 1.434461 | 1.15372  |
| RCC1 domain containing 1                                                  | 1.136379 | 0.434448 |          |
| centrosomal protein 192kDa                                                | 0.959904 | 1.0817   | 0.841172 |
| ladinin 1                                                                 | 0.791976 | 1.55458  | 2.212901 |
| troponin I type 3 (cardiac)                                               |          | 0.424204 |          |
| similar to hypothetical protein                                           | 1.493218 | 0.406349 | 1.20364  |
| Similar to KIAA1237 protein                                               | 4.449758 | 2.226501 | 3.715159 |
| solute carrier family 7 (cationic amino acid transporter, y+ system), mer |          | 0.136541 |          |
| NDUFA12-like                                                              | 0.519083 | 1.339816 | 2.160735 |
| elastin (supravalvular aortic stenosis, Williams-Beuren syndr             | 0.565795 | 0.661619 | 0.726381 |
| Similar to Chromosome 4 open reading frame 32                             | 0.694861 | 0.931408 | 0.390072 |
| similar to Ran binding protein 11                                         | 0.557483 | 1.153965 | 2.446132 |
| ISG12-1 protein-like                                                      | 4.453338 | 2.662163 | 10.75652 |
| troponin C type 2 (fast)                                                  | 0.82471  | 1.055422 | 3.635145 |
| F-box protein 31                                                          | 1.208219 | 0.576299 | 2.439155 |
| hypothetical protein LOC770630                                            | 112.8299 | 1.118901 | 0.397148 |
| endothelin 2                                                              | 1.242075 | 4.139586 | 1.259831 |
| hypothetical LOC427229                                                    | 1.407474 | 0.754078 | 0.437909 |
| transcription factor 21                                                   | 4.745378 | 1.072599 | 4.685581 |
| peroxisomal biogenesis factor 12                                          | 1.036293 | 1.419055 | 2.533562 |
| cytidine monophosphate (UMP-CMP) kinase 2, mitochondri                    | 6.040607 | 2.562893 | 4.679065 |
| ribosomal protein L7-like 1                                               | 1.09204  | 0.955646 | 0.594318 |
| interleukin 8                                                             | 5.052205 | 2.15385  | 1.466765 |
| chromosome 8 open reading frame 80                                        | 2.301619 | 2.006848 | 2.574014 |
| chromosome 13 open reading frame 18                                       | 1.269735 | 1.969471 | 2.098776 |
| TIA1 cytotoxic granule-associated RNA binding protein-like                | 1.482059 | 0.794805 | 0.308033 |
| Hypothetical LOC417387                                                    | 1.309219 | 0.849695 | 0.412801 |
| phosphoglycerate mutase family member 5                                   | 1.084488 | 1.459953 | 0.472504 |
| TIP41, TOR signalling pathway regulator-like (S. cerevisiae)              | 1.16844  | 1.336623 | 0.728557 |
| ankyrin repeat domain 40                                                  | 1.260711 | 1.208677 | 1.092409 |
| calmodulin binding transcription activator 1                              | 0.631143 | 0.795001 | 0.563994 |

|                                                                           |          |          |          |
|---------------------------------------------------------------------------|----------|----------|----------|
| similar to ST3A1                                                          | 1.655054 | 4.437985 | 4.74288  |
| hypothetical LOC424241                                                    | 0.728586 | 0.896693 | 0.200207 |
| chromosome 1 open reading frame 9                                         | 0.71921  | 0.842553 | 0.144444 |
| similar to thioesterase B                                                 | 1.279197 | 2.303794 | 5.339675 |
| similar to LOC443703 protein                                              | 1.073517 | 1.155471 | 5.239765 |
| carboxylesterase 1 (monocyte/macrophage serine esterase 1)                | 1.017549 | 2.062812 | 3.366569 |
| Similar to thioesterase B                                                 | 20.38913 | 0.800833 |          |
| similar to thioesterase B /// similar to thioesterase B                   | 0.776777 | 1.763851 | 15.616   |
| acylglycerol kinase                                                       | 0.857693 | 1.376301 | 0.363837 |
| acylglycerol kinase                                                       | 0.578093 | 1.683883 | 0.365744 |
| fragile X mental retardation, autosomal homolog 1                         | 1.295897 | 0.899602 | 0.429168 |
| protein kinase C, eta                                                     | 1.398246 | 2.137347 | 2.47655  |
| transmembrane protein 120A                                                | 0.397214 | 0.759878 | 0.287479 |
| hypothetical protein LOC768701                                            | 1.258708 | 0.784615 | 1.973581 |
| similar to similar to CDNA sequence BC043118                              | 0.744405 | 1.585787 | 2.14163  |
| laminin, alpha 2 (merosin, congenital muscular dystrophy)                 | 0.779413 | 2.175772 | 8.986461 |
| kinesin family member 13A                                                 | 0.986279 | 0.779646 | 2.17386  |
| glutathione S-transferase alpha 3                                         | 0.731397 | 1.355493 | 2.695437 |
| Atonal homolog 8 (Drosophila)                                             | 1.352379 | 1.552728 | 1.050289 |
| axin 2                                                                    | 1.056964 | 0.853605 | 3.20673  |
| Axin 2                                                                    | 1.42943  | 0.843208 | 2.597852 |
| glucuronidase, beta                                                       | 1.350038 | 1.498378 | 2.307096 |
| aldehyde dehydrogenase 2 family (mitochondrial)                           | 1.28865  | 1.071996 | 2.379984 |
| tandem C2 domains, nuclear                                                | 1.01785  | 1.162437 | 2.939153 |
| neuropeptide Y                                                            | 1.452234 | 0.980368 | 4.536183 |
| Rap guanine nucleotide exchange factor (GEF) 3                            |          |          | 84.72007 |
| ring finger protein 122                                                   | 0.46548  | 1.473551 | 1.44052  |
| small nuclear ribonucleoprotein D3 polypeptide 18kDa                      | 0.743728 | 1.104813 | 0.402511 |
| FUS interacting protein (serine/arginine-rich) 1                          | 1.099469 | 0.942148 | 0.523976 |
| ATPase, Na <sup>+</sup> /K <sup>+</sup> transporting, alpha 3 polypeptide | 0.352292 |          |          |
| secretory carrier membrane protein 5                                      | 0.957437 | 0.913212 | 2.05026  |
| LATS, large tumor suppressor, homolog 1 (Drosophila)                      | 0.775845 | 2.398883 | 0.578112 |
| similar to KIAA0592 protein                                               | 1.578172 |          | 0.372411 |
| epithelial membrane protein 1                                             |          |          | 2.021258 |
| centrosomal protein 57kDa                                                 | 0.476257 | 1.129249 | 0.938405 |
| FUN14 domain containing 2                                                 | 0.545278 | 1.021101 | 2.446939 |
| similar to C-type lectin                                                  | 0.642936 | 0.36179  | 1.536572 |
| cadherin                                                                  | 0.484985 |          |          |
| cadherin                                                                  | 0.793064 | 0.382255 | 1.510314 |
| Ubiquitin-conjugating enzyme E2F (putative)                               |          | 0.067361 |          |

|                                                             |          |          |          |
|-------------------------------------------------------------|----------|----------|----------|
| Jumping translocation breakpoint                            | 0.670498 | 1.147595 | 1.200972 |
| chromosome 20 open reading frame 42                         | 1.704282 | 1.53372  | 2.083208 |
| myosin, light chain 2, regulatory, cardiac, slow            | 0.243548 | 1.006451 | 0.380106 |
| Der1-like domain family, member 3                           | 1.372317 | 0.464165 | 0.479225 |
| F-box and leucine-rich repeat protein 12                    |          | 0.621793 |          |
| chromosome 18 open reading frame 45                         | 1.238171 | 1.549081 | 0.984284 |
| chromosome 9 open reading frame 21                          | 2.381829 | 0.739918 | 2.427491 |
| similar to tRNA selenocysteine associated protein           | 0.817184 | 1.112515 | 0.491233 |
| chromosome 9 open reading frame 80                          | 0.721127 | 0.143354 |          |
| phosphatase and actin regulator 1                           |          |          |          |
| insulin-like growth factor binding protein 4                | 1.887495 | 0.551855 | 2.062228 |
| Similar to Ecrg4-A protein                                  | 1.377714 | 0.497799 | 0.208165 |
| Chromosome 4 open reading frame 33                          | 1.422401 | 2.532237 | 0.645066 |
| Chromosome 4 open reading frame 33                          | 1.182726 | 2.467201 | 1.031335 |
| dual specificity phosphatase 6                              | 2.350251 | 0.97049  | 1.799413 |
| Glutathione reductase                                       | 0.886533 | 1.111797 | 1.716178 |
| fibroblast growth factor binding protein 2                  | 0.877277 | 0.886027 | 0.776446 |
| histidine ammonia-lyase                                     |          |          |          |
| similar to Scale keratin (S-ker) (sKer)                     | 0.952769 | 0.473372 |          |
| telomeric repeat binding factor (NIMA-interacting) 1        | 0.445666 | 1.036543 | 0.795694 |
| Similar to immunoglobulin-like receptor CHIR-AB1            | 1.364975 |          | 2.475017 |
| interleukin 1 receptor, type I                              | 1.737891 | 2.685704 | 4.920364 |
| glycine C-acetyltransferase (2-amino-3-ketobutyrate coenzym | 0.320404 | 0.971591 | 0.167601 |
| BUB1 budding uninhibited by benzimidazoles 1 homolog be     | 0.692599 | 1.128802 | 0.681406 |
| chromodomain helicase DNA binding protein 1                 | 316.2725 | 1.339711 | 0.197797 |
| SMT3 suppressor of mif two 3 homolog 1 (S. cerevisiae)      | 0.8785   | 1.036399 | 0.494597 |
| non-SMC condensin I complex, subunit G                      | 0.598123 | 1.254538 | 0.735828 |
| Peroxisome biogenesis factor 10                             | 2.401127 | 0.990037 | 0.515777 |
| far upstream element (FUSE) binding protein 1               | 0.732673 | 0.600573 | 0.355263 |
| far upstream element (FUSE) binding protein 1               | 1.319722 | 0.878779 | 0.49138  |
| signal recognition particle 72kDa                           | 1.186863 | 1.079184 | 2.594105 |
| signal recognition particle 72kDa                           | 1.812699 | 0.26979  | 1.395344 |
| NADH dehydrogenase (ubiquinone) flavoprotein 1, 51kDa       | 0.768359 | 1.061186 | 1.617273 |
| fibroblast growth factor 9 (glia-activating factor)         |          | 0.158371 |          |
| ribosomal protein S13                                       | 6.458999 | 0.065755 | 1.251301 |
| Ribosomal protein S13                                       | 9.002128 | 1.412891 |          |
| nipsnap homolog 3A (C. elegans)                             | 0.708941 | 0.81101  | 2.259385 |
| tribbles homolog 2 (Drosophila)                             | 1.117219 | 0.951277 | 0.382237 |
| tribbles homolog 2 (Drosophila)                             | 1.16739  | 1.166007 | 0.4887   |
| Src-like-adaptor                                            | 1.267968 | 0.665499 | 0.131049 |

|                                                                        |          |          |          |
|------------------------------------------------------------------------|----------|----------|----------|
| Src-like-adaptor                                                       | 0.686725 | 0.676497 | 0.309472 |
| aspartyl aminopeptidase                                                | 0.695098 | 1.061413 | 2.072233 |
| lipoma HMGIC fusion partner-like 5                                     |          | 10.28834 | 3.679422 |
| low density lipoprotein receptor                                       | 3.029991 | 1.056424 | 0.633477 |
| cAMP responsive element binding protein 1                              | 0.638    | 0.481522 | 2.048235 |
| cAMP responsive element binding protein 1                              | 1.427968 | 2.630325 | 0.208984 |
| unc-5 homolog C (C. elegans)                                           | 0.764515 | 0.319367 | 1.02454  |
| tankyrase, TRF1-interacting ankyrin-related ADP-ribose pol             | 1.03541  | 1.167059 | 0.956118 |
| lectin, galactoside-binding, soluble, 1                                | 0.837567 | 1.56736  | 2.824501 |
| ATP synthase, H <sup>+</sup> transporting, mitochondrial F1 complex, c | 1.727762 | 0.274073 | 1.037658 |
| basic transcription factor 3-like 4                                    | 0.741413 | 1.246796 | 0.538362 |
| interleukin 17F                                                        |          | 2.323662 | 1.711169 |
| similar to Transcriptional adaptor 1 (HFI1 homolog, yeast)-li          | 0.824672 | 0.900568 | 0.471943 |
| Syndecan 1                                                             | 1.141391 | 1.256288 | 3.30958  |
| signal transducer and activator of transcription 3 (acute-phas         | 1.82104  | 1.021019 | 2.437026 |
| similar to CG9147-PB                                                   | 0.441398 | 1.274818 | 0.997773 |
| Solute carrier family 5 (sodium/glucose cotransporter), mem            | 0.857598 | 1.708718 | 5.779653 |
| gap junction protein, delta 3, 31.9kDa                                 | 2.105465 | 0.807608 | 0.764357 |
| Similar to Williams Beuren syndrome chromosome region 2'               | 0.862338 |          |          |
| gap junction protein, alpha 5, 40kDa                                   | 1.564576 |          | 4.881511 |
| solute carrier family 5 (sodium/glucose cotransporter), meml           | 1.456952 | 2.466588 | 1.646705 |
| collagen, type XVII, alpha 1                                           | 0.65621  | 1.006708 | 0.723273 |
| cytohesin 4                                                            | 1.111161 | 0.582183 | 0.304619 |
| chromosome 14 open reading frame 83                                    | 1.697812 | 0.689634 | 0.550319 |
| fibroblast growth factor receptor 1                                    | 1.503856 | 1.092461 | 2.410799 |
| dual specificity phosphatase 15                                        | 1.297641 | 1.331939 | 2.66725  |
| solute carrier family 2 (facilitated glucose transporter), meml        | 0.937742 | 1.316617 | 3.516434 |
| calponin alpha                                                         | 1.650329 | 0.714749 | 1.234975 |
| regulator of G-protein signalling 14                                   | 0.945118 | 0.608527 | 1.357659 |
| polo-like kinase 3 (Drosophila)                                        | 1.407741 | 1.205476 | 2.546442 |
| microtubule associated monooxygenase, calponin and LIM do              | 1.175839 | 0.705042 | 1.981197 |
| mal, T-cell differentiation protein 2                                  | 1.191121 | 1.416167 | 3.544155 |
| similar to Junction plakoglobin                                        | 0.767748 | 0.790592 | 0.540656 |
| similar to Ig V-region-like B-G antigen 17                             | 1.404408 | 1.36664  | 0.175753 |
| YTH domain containing 1                                                | 1.388355 | 0.771614 | 0.318788 |
| ATPase, Ca <sup>++</sup> transporting, cardiac muscle, fast twitch 1   | 3.586559 | 1.280358 | 4.192113 |
| fibroblast growth factor receptor-like 1                               | 1.561324 |          |          |
| tumor necrosis factor (ligand) superfamily, member 10                  | 1.939339 | 1.17937  | 1.969265 |
| tumor necrosis factor (ligand) superfamily, member 10                  | 1.324276 | 0.991359 | 3.929961 |
| E4F transcription factor 1                                             | 2.359416 | 0.992104 | 0.617378 |

|                                                                      |          |          |          |
|----------------------------------------------------------------------|----------|----------|----------|
| parvalbumin                                                          | 0.561755 | 1.047877 | 0.10366  |
| leucine-rich repeat-containing G protein-coupled receptor 4          | 1.66654  | 1.899686 | 1.867794 |
| Transmembrane protein 34                                             | 1.058307 | 0.45872  | 0.568625 |
| FCF1 small subunit (SSU) processome component homolog                | 0.482674 | 1.137849 | 1.609673 |
| Ewing sarcoma breakpoint region 1                                    | 3.058683 | 0.580688 | 0.793586 |
| zinc finger and BTB domain containing 17                             | 1.08502  | 0.74736  | 1.547863 |
| N-acetylneuraminic acid synthase (sialic acid synthase)              | 1.021216 | 1.460132 | 0.419934 |
| farnesyl-diphosphate farnesyltransferase 1                           | 0.478658 | 0.926035 | 0.990897 |
| myosin binding protein H                                             | 0.734603 | 0.822844 | 0.293801 |
| Wiskott-Aldrich syndrome-like                                        | 1.25058  | 0.929244 | 0.988843 |
| family with sequence similarity 100, member A                        | 0.627988 | 1.153417 | 2.261611 |
| similar to MUC2                                                      | 1.011593 | 3.126339 | 0.937004 |
| Similar to keratin 18                                                | 1.06183  | 1.566923 | 1.619396 |
| Tubulin, delta 1                                                     | 2.040591 | 0.70006  | 1.598583 |
| Tubulin, delta 1                                                     | 0.796861 | 1.018158 | 2.193119 |
| ATPase, H <sup>+</sup> /K <sup>+</sup> exchanging, beta polypeptide  | 1.346774 | 1.676555 | 1.1052   |
| kelch repeat and BTB (POZ) domain containing 2                       | 1.174989 | 0.865498 | 0.430129 |
| isopentenyl-diphosphate delta isomerase 1                            | 0.804519 | 1.078639 | 0.681181 |
| sulfotransferase family, cytosolic, 1B, member 1                     | 1.460023 | 0.941116 | 2.060114 |
| zinc finger and BTB domain containing 43                             | 0.986819 | 1.227848 | 0.238818 |
| FK506 binding protein 7                                              | 2.031293 | 0.935552 | 1.475602 |
| bromodomain containing 1                                             | 1.650849 | 0.89461  | 0.402507 |
| mitogen-activated protein kinase kinase kinase 8                     | 3.406311 | 2.003632 | 2.01142  |
| adenosylmethionine decarboxylase 1                                   | 0.901628 | 2.564122 | 1.745425 |
| glycerophosphodiester phosphodiesterase 1                            | 0.38634  | 0.7668   | 0.906921 |
| oncomodulin 2                                                        | 0.181644 | 0.894084 | 0.010404 |
| N-myc (and STAT) interactor                                          | 1.967915 | 1.784052 | 2.00821  |
| aquaporin 11                                                         |          | 9.957932 |          |
| Ataxin 7-like 1                                                      | 1.228888 | 0.849157 | 1.05501  |
| Diacylglycerol kinase, delta 130kDa                                  | 1.930394 | 1.012993 | 2.023154 |
| collagen, type VI, alpha 3                                           | 1.681778 | 1.462163 | 2.61485  |
| membrane metallo-endopeptidase                                       | 3.475706 | 1.380113 | 13.07196 |
| membrane metallo-endopeptidase                                       |          |          |          |
| Dipeptidyl-peptidase 4 (CD26, adenosine deaminase complexing protein |          | 22.92608 |          |
| integrin, alpha 3 (antigen CD49C, alpha 3 subunit of VLA-3           | 1.141352 | 0.776711 | 1.328216 |
| presenilin associated, rhomboid-like                                 | 0.91372  | 0.345006 | 1.285848 |
| Cadherin 8, type 2                                                   | 0.570512 | 1.763433 | 1.515332 |
| protein phosphatase 2, regulatory subunit B', gamma isoform          | 1.36746  | 2.501677 | 0.425897 |
| eukaryotic translation initiation factor 5                           | 1.045507 | 1.107556 | 0.485509 |
| meprin A, alpha (PABA peptide hydrolase)                             | 1.495062 | 1.47809  | 4.132357 |



|                                                                |          |          |          |
|----------------------------------------------------------------|----------|----------|----------|
| WD repeat and FYVE domain containing 3                         | 0.366494 |          | 1.716018 |
| protein phosphatase 1, regulatory (inhibitor) subunit 16B      | 2.075271 | 0.711475 | 2.701115 |
| antizyme inhibitor 1 /// similar to ornithine decarboxylase an | 0.898772 | 1.223386 | 1.175128 |
| oxysterol binding protein-like 6                               | 0.407329 | 0.67878  |          |
| perilipin                                                      | 2.322896 | 1.186029 | 3.524034 |
| corticotropin releasing hormone receptor 2                     |          | 0.27519  |          |
| thioredoxin 2                                                  | 0.793411 | 1.125994 | 0.429395 |
| similar to HBxAg transactivated protein 2 /// similar to HBx.  | 0.689125 | 0.969217 | 2.860472 |
| S100 calcium binding protein A6                                | 1.435396 | 1.51135  | 3.72006  |
| hypothetical protein LOC769755                                 | 0.673902 | 0.627029 | 1.787733 |
| fatty acid binding protein 6, ileal (gastrotropin)             | 1.420443 | 1.345768 | 1.137572 |
| similar to GTPase, IMAP family member 7                        | 1.166176 | 1.281699 | 8.777992 |
| chromosome 1 open reading frame 58                             | 1.036568 | 3.451736 | 2.160775 |
| acyl-Coenzyme A dehydrogenase family, member 11                | 0.823403 | 1.083361 | 2.093031 |
| hypothetical LOC424832                                         | 0.978044 | 0.741822 | 0.323916 |
| chemokine (C-C motif) receptor 8                               | 1.877737 | 2.334662 | 3.904043 |
| THO complex 7 homolog (Drosophila)                             | 0.5768   | 0.766251 | 0.204298 |
| nucleoporin like 2                                             | 0.460976 | 1.24866  | 0.352607 |
| protocadherin 24                                               | 2.149657 | 3.262589 | 6.030731 |
| A kinase (PRKA) anchor protein 13                              | 1.345197 | 1.141566 | 2.675684 |
| mesenchyme homeobox 2                                          | 3.696918 | 1.03825  | 2.086782 |
| adenosine A3 receptor                                          | 0.826941 | 2.171077 | 0.92338  |
| keratin associated protein 10-4                                | 0.463102 |          |          |
| serine/threonine kinase 17b                                    | 0.93802  | 0.577873 | 0.411859 |
| FK506 binding protein 4, 59kDa                                 | 0.770449 | 0.978137 | 0.590587 |
| KIAA0494                                                       | 0.912673 | 1.041586 | 2.30536  |
| atrophin 1                                                     | 2.160497 | 0.778244 | 1.375702 |
| sorting nexin 4                                                | 1.188434 | 0.797901 | 0.422923 |
| sorting nexin 4                                                | 0.59325  | 1.346906 | 0.235812 |
| complement component 1, r subcomponent                         | 3.037259 | 2.052326 | 3.531933 |
| scavenger receptor class B, member 1                           | 1.407828 | 1.008473 | 2.759235 |
| syntaxin 2                                                     | 0.385164 | 1.1483   | 1.387105 |
| beclin 1, autophagy related                                    | 1.213798 | 0.905989 | 0.694912 |
| NCK adaptor protein 2                                          | 1.172191 | 1.086055 | 0.592862 |
| Ethylmalonic encephalopathy 1                                  | 0.859967 | 1.16985  | 1.330032 |
| dedicator of cytokinesis 9                                     | 2.145856 | 0.845763 | 1.103954 |
| Golgi membrane protein 1                                       | 1.39806  | 1.000338 | 0.555297 |
| Wolf-Hirschhorn syndrome candidate 2                           | 0.882996 | 1.044982 | 0.449585 |
| similar to pim-3 protein                                       | 1.52788  | 1.30915  | 4.077858 |
| similar to cytosolic nucleotidase I                            | 0.874973 | 0.936441 | 0.945099 |

|                                                              |          |          |          |
|--------------------------------------------------------------|----------|----------|----------|
| ectonucleotide pyrophosphatase/phosphodiesterase 3           | 2.896299 | 2.974906 | 3.319189 |
| chromosome 12 open reading frame 10                          | 0.892357 | 1.159249 | 1.508004 |
| transcobalamin II; macrocytic anemia                         | 1.444106 | 3.845743 | 1.871388 |
| hydrogen voltage-gated channel 1                             | 2.15275  | 0.534347 | 0.681513 |
| abl interactor 2                                             | 0.692022 | 0.997079 | 0.468827 |
| DnaJ (Hsp40) homolog, subfamily C, member 3                  | 0.407527 | 0.950643 |          |
| potassium voltage-gated channel, shaker-related subfamily, r | 1.612056 | 1.02999  | 0.809357 |
| Rh-associated glycoprotein                                   | 0.678059 | 2.143402 | 3.076522 |
| Rh-associated glycoprotein                                   | 0.903096 | 1.219892 | 3.381127 |
| somatostatin II                                              |          |          |          |
| slit homolog 2 (Drosophila)                                  | 2.016965 | 1.43701  |          |
| lysozyme G-like 2                                            | 5.55333  | 2.880743 | 6.193183 |
| immunoglobulin-like receptor CHIR-A2 /// similar to immu     | 1.734975 | 0.582035 | 2.769917 |
| ATPase, class V, type 10D                                    | 0.820489 | 1.306111 |          |
| fizzy/cell division cycle 20 related 1 (Drosophila)          |          | 0.36488  |          |
| alanyl-tRNA synthetase                                       |          |          | 0.276429 |
| Chemokine ah221                                              | 9.107544 | 2.561138 | 9.052442 |
| tumor-associated calcium signal transducer 1                 | 1.709032 | 2.185387 | 1.182811 |
| tumor-associated calcium signal transducer 1                 | 1.207523 | 1.369786 | 2.257456 |
| tumor-associated calcium signal transducer 1                 | 2.172786 | 3.632697 | 0.505414 |
| GEM interacting protein                                      | 1.173481 | 1.027811 | 2.62586  |
| fizzy-related protein homolog                                | 0.452644 | 0.074535 |          |
| hypothetical LOC424588                                       | 1.219454 | 0.825974 | 2.573654 |
| haloacid dehalogenase-like hydrolase domain containing 2     |          | 0.393402 | 1.917629 |
| suppressor of cytokine signaling 3                           | 1.016029 | 1.134717 | 2.87136  |
| transmembrane protein 169                                    | 1.113749 | 0.716379 | 2.414502 |
| phosphofurin acidic cluster sorting protein 2                | 0.341791 | 0.342558 | 1.042839 |
| transmembrane protein 57                                     | 1.202401 | 1.031463 | 0.741089 |
| COX19 cytochrome c oxidase assembly homolog (S. cerevis      | 0.901344 | 1.02152  | 0.475141 |
| AHA1, activator of heat shock 90kDa protein ATPase homo      | 2.708017 | 0.680856 | 0.721467 |
| interferon, gamma                                            | 3.606716 | 3.404986 | 4.745357 |
| DnaJ (Hsp40) homolog, subfamily B, member 6                  | 1.254165 | 1.29399  | 0.406413 |
| DnaJ (Hsp40) homolog, subfamily B, member 6                  | 1.079453 | 1.630744 | 0.387191 |
| Pantothenate kinase 3                                        | 1.086128 | 1.101842 | 0.534679 |
| chromosome 6 open reading frame 163                          |          | 2.626562 |          |
| S100 calcium binding protein B                               |          |          | 10.01721 |
| potassium channel tetramerisation domain containing 10       |          | 1.334129 | 0.04632  |
| potassium channel tetramerisation domain containing 10       |          |          | 0.074344 |
| potassium channel tetramerisation domain containing 10       | 3.419786 | 1.83927  | 0.394651 |
| potassium large conductance calcium-activated channel, sub   | 5.554926 |          | 7.753195 |

|                                                               |          |          |          |
|---------------------------------------------------------------|----------|----------|----------|
| Ribosomal protein S25                                         |          |          |          |
| Similar to MGC83563 protein                                   | 1.004148 | 0.921939 | 0.957438 |
| neuralized homolog (Drosophila)                               | 1.584212 | 1.282628 | 3.8413   |
| phosphoribosyl pyrophosphate synthetase-associated protein    | 0.573246 | 0.867198 | 0.866322 |
| agmatine ureohydrolase (agmatinase) /// similar to putative a | 1.263669 | 1.422745 | 2.93834  |
| Sp1 transcription factor                                      | 7.836747 | 0.539776 | 0.734763 |
| ectonucleoside triphosphate diphosphohydrolase 1              | 0.689813 | 0.864404 | 0.789359 |
| placenta-specific 8                                           | 1.283966 | 2.30541  | 2.723897 |
| similar to Pre-mRNA cleavage complex 2 protein Pcf11 (Pre     | 2.186431 | 1.048438 | 0.409257 |
| nucleolar protein 14                                          | 1.036192 | 1.16906  | 1.03072  |
| M-phase phosphoprotein 10 (U3 small nucleolar ribonucleop     | 0.957485 | 0.953063 | 0.431968 |
| mitochondrial ribosomal protein S10                           | 0.768242 | 1.044983 | 0.515471 |
| alpha thalassemia/mental retardation syndrome X-linked        | 0.38105  | 0.873018 | 0.820984 |
| ELMO/CED-12 domain containing 2                               | 0.774829 | 0.989791 | 0.559511 |
| leptin receptor                                               | 2.375417 | 0.810315 |          |
| HLA-G histocompatibility antigen, class I, G /// similar to M | 0.755021 | 3.907836 | 33.51654 |
| major histocompatibility complex class I glycoprotein         | 1.110531 | 1.611255 | 0.980386 |
| tektin 4                                                      | 2.002716 |          |          |
| similar to MHC Rfp-Y class I alpha chain /// similar to MHC   | 1.017612 | 0.383146 | 2.117626 |
| high mobility group AT-hook 1                                 | 0.769999 | 1.285612 | 0.483886 |
| jumonji domain containing 2C                                  | 1.097269 | 1.054941 | 2.10766  |
| mutS homolog 2, colon cancer, nonpolyposis type 1 (E. coli)   | 0.755778 | 1.146401 | 0.803803 |
| phospholipase A2, group VI (cytosolic, calcium-independent    | 2.414054 | 0.860137 | 2.029066 |
| alanyl (membrane) aminopeptidase (aminopeptidase N, amin      | 0.857335 | 2.22266  | 6.681004 |
| serine hydrolase-like 2                                       | 0.755581 | 0.513287 | 0.4276   |
| Hypothetical protein LOC772074                                | 1.074416 | 0.901628 | 2.642076 |
| centrin, EF-hand protein, 3 (CDC31 homolog, yeast)            | 0.362292 | 1.087952 | 0.584366 |
| eukaryotic translation initiation factor 2 alpha kinase 4     | 1.194473 | 1.025579 | 0.09374  |
| heparan sulfate 2-O-sulfotransferase 1                        | 1.737299 | 1.021035 | 0.503822 |
| heparan sulfate 2-O-sulfotransferase 1                        | 0.564755 | 1.059376 | 0.650674 |
| fibronectin 1                                                 | 3.549117 | 1.226821 | 1.534356 |
| IMP3, U3 small nucleolar ribonucleoprotein, homolog (yeast)   | 0.484922 | 1.284277 | 1.033453 |
| carnitine palmitoyltransferase 1A (liver)                     | 0.555198 | 0.696945 | 1.948982 |
| v-akt murine thymoma viral oncogene homolog 2                 | 0.710428 | 0.823961 | 1.155651 |
| similar to RIKEN cDNA 5830415L20                              | 0.838368 | 0.969321 | 0.718692 |
| similar to MGC80162 protein                                   | 1.061129 | 1.124848 | 1.592897 |
| neuronal pentraxin II                                         | 0.636269 | 0.417951 | 0.551969 |
| plasminogen activator, tissue                                 | 0.756332 | 0.092561 | 0.152757 |
| FAST kinase domains 2                                         | 0.548667 | 1.377803 | 2.039218 |
| glycine/arginine rich protein 1                               | 1.333972 | 0.887096 | 2.337495 |

|                                                             |          |          |          |
|-------------------------------------------------------------|----------|----------|----------|
| SRY (sex determining region Y)-box 4                        | 0.708699 | 0.562629 | 0.428962 |
| Keratin 222 pseudogene                                      | 0.998671 | 0.593562 | 0.035429 |
| ADP-ribosylhydrolase like 1                                 | 0.767515 | 0.33362  | 1.164533 |
| WEE1 homolog (S. pombe)                                     | 0.826282 | 1.171021 | 0.564709 |
| chromosome 4 open reading frame 34                          | 0.892017 | 2.086032 | 0.90974  |
| serum/glucocorticoid regulated kinase 1                     | 2.053299 | 1.744389 | 4.035993 |
| serum/glucocorticoid regulated kinase 1                     | 1.404177 | 2.075523 | 2.453271 |
| G1 to S phase transition 1                                  | 0.932982 | 1.09393  | 0.484333 |
| Histidine triad nucleotide binding protein W                | 2.214362 | 4.190777 | 0.83144  |
| ubiquitin specific peptidase 7 (herpes virus-associated)    | 1.125013 | 0.92529  | 0.520698 |
| ubiquitin specific peptidase 7 (herpes virus-associated)    | 0.807311 | 1.131388 | 0.015375 |
| apoptosis, caspase activation inhibitor                     | 4.2528   | 0.543372 | 0.039731 |
| vimentin                                                    | 1.112027 | 1.210148 | 1.06926  |
| nuclear factor related to kappaB binding protein            | 2.155732 | 0.921819 | 0.643015 |
| nuclear factor related to kappaB binding protein            | 2.367941 | 1.130264 | 0.433766 |
| surfactant, pulmonary-associated protein A1                 | 1.15118  | 1.741931 | 3.256441 |
| hypothetical LOC423783                                      | 2.015953 | 1.422106 | 0.488265 |
| insulin-like growth factor binding protein 5                |          | 1.508486 | 11.50401 |
| RIO kinase 1 (yeast)                                        | 0.353065 | 0.88015  | 0.851604 |
| tudor domain containing 3                                   | 1.022965 | 0.927724 | 1.274341 |
| superoxide dismutase 2, mitochondrial                       | 0.895134 | 1.065026 | 0.491121 |
| glycyl-tRNA synthetase                                      | 2.175394 | 1.435447 | 3.591631 |
| acidic (leucine-rich) nuclear phosphoprotein 32 family, mem | 0.441976 | 1.140832 | 0.570744 |
| acidic (leucine-rich) nuclear phosphoprotein 32 family, mem | 2.601655 | 0.595131 | 0.952056 |
| IKAROS family zinc finger 2 (Helios)                        | 0.745254 | 0.85885  | 0.29192  |
| Gem (nuclear organelle) associated protein 4                | 0.723402 | 1.421307 | 3.005865 |
| SIVA1, apoptosis-inducing factor                            | 0.892677 | 0.905881 | 0.48985  |
| retinol binding protein 7, cellular                         | 2.878328 | 2.456374 | 6.285202 |
| gamma-glutamyltransferase 1                                 | 0.703259 | 1.567971 | 2.159741 |
| prominin-like protein                                       | 1.591382 | 0.553829 | 3.168032 |
| Actin, beta                                                 | 0.958873 | 0.925542 | 0.348695 |
| KH-type splicing regulatory protein                         |          | 2.400341 |          |
| coiled-coil domain containing 109B                          | 0.976984 | 2.21351  | 0.845396 |
| proprotein convertase subtilisin/kexin type 2               | 2.167185 | 1.627126 | 2.905537 |
| family with sequence similarity 101, member B               | 1.195024 | 1.146022 | 3.837599 |
| selenoprotein T                                             | 1.025355 | 1.183794 | 0.651125 |
| glutamate receptor, ionotropic, AMPA 1                      |          | 0.33325  |          |
| centromere protein H                                        | 0.539081 | 1.074351 | 1.087254 |
| similar to orphan G-protein coupled receptor Dez            | 1.355615 | 1.280763 | 1.847911 |
| chromosome 17 open reading frame 63                         |          | 0.72877  | 2.410772 |

|                                                                          |          |          |          |
|--------------------------------------------------------------------------|----------|----------|----------|
| integral membrane protein 2B                                             | 0.740567 | 1.017735 | 0.488353 |
| angiopoietin 1                                                           | 4.466857 |          |          |
| lin-52 homolog (C. elegans)                                              | 0.956252 | 0.995958 | 0.385355 |
| integrin, beta 5                                                         | 1.837185 | 1.268536 | 2.022104 |
| dystroglycan                                                             | 0.435208 |          |          |
| dystroglycan                                                             | 0.682004 | 0.937799 | 6.417893 |
| dystroglycan                                                             | 0.710161 | 0.910749 | 2.974739 |
| receptor tyrosine kinase-like orphan receptor 1                          | 1.684302 | 0.910212 | 0.492276 |
| brain-specific homeobox                                                  | 0.779808 | 0.068909 |          |
| cHz-cadherin                                                             |          |          | 3.760671 |
| receptor interacting protein kinase 5                                    | 1.157189 | 0.534537 | 0.29628  |
| heparan sulfate 6-O-sulfotransferase 2                                   | 0.743117 | 0.821817 | 0.702553 |
| heparanase                                                               | 2.117394 | 1.120967 | 1.823275 |
| basic helix-loop-helix domain containing, class B, 4                     | 2.257845 | 7.902049 | 0.084033 |
| protocadherin 17                                                         | 0.894483 | 2.048339 | 0.914436 |
| protocadherin gamma subfamily C, 5                                       | 0.467305 | 1.022571 |          |
| FAT tumor suppressor homolog 3 (Drosophila)                              |          |          |          |
| bone morphogenetic protein 10                                            | 1.275666 | 7.545814 | 0.934796 |
| tubby like protein 1                                                     |          |          | 19.51533 |
| protein phosphatase 2 (formerly 2A), regulatory subunit B, alpha isoform |          |          | 0.057199 |
| 3-hydroxyisobutyryl-Coenzyme A hydrolase                                 |          | 1.24558  | 0.288498 |
| chemokine (C-X-C motif) ligand 12 (stromal cell-derived fac              | 0.774954 | 0.894717 | 0.797204 |
| Chemokine (C-X-C motif) ligand 12 (stromal cell-derived fa               | 0.938235 | 0.792307 | 0.356384 |
| 3-hydroxyanthranilate 3,4-dioxygenase                                    | 1.535529 | 1.17071  | 2.072118 |
| DENN/MADD domain containing 4A                                           |          | 0.322471 |          |
| chromosome 6 open reading frame 117                                      | 0.377235 | 1.298564 | 1.148367 |
| NK2 homeobox 1                                                           |          | 13.7962  |          |
| KIAA1946                                                                 | 0.275367 | 0.810874 | 1.147337 |
| EF-hand calcium binding protein 1                                        | 0.453017 | 1.263278 | 0.193664 |
| chromosome 14 open reading frame 143                                     | 1.198458 | 2.72963  | 0.505933 |
| cathelicidin antimicrobial peptide                                       | 0.28427  |          |          |
| zinc finger, DHHC-type containing 6                                      | 0.985311 | 1.054877 | 0.463851 |
| coiled-coil domain containing 131                                        | 2.181873 | 0.731726 | 1.265437 |
| motile sperm domain containing 2                                         | 0.668294 | 1.046915 | 0.416256 |
| Solute carrier family 7 (cationic amino acid transporter, y+ s           | 3.190525 |          |          |
| Family with sequence similarity 120A                                     | 0.719167 | 0.693827 | 0.615031 |
| zinc finger and BTB domain containing 34                                 | 1.728414 | 0.674229 | 0.500023 |
| chemokine (C-C motif) ligand 4 /// chemokine (C-C motif) li              | 0.789418 | 1.577483 | 0.491768 |
| chromosome 1 open reading frame 55                                       | 1.117967 | 0.761642 | 0.330261 |
| Solute carrier family 25, member 37                                      | 19.7954  | 0.836707 |          |

|                                                               |          |          |          |
|---------------------------------------------------------------|----------|----------|----------|
| solute carrier family 25, member 37                           | 0.211071 | 2.199596 | 3.234434 |
| UDP-GlcNAc:betaGal beta-1,3-N-acetylglucosaminyltransfe       | 1.869807 |          | 11.81605 |
| extracellular matrix protein 2, female organ and adipocyte sp | 0.967286 | 0.553097 | 0.553004 |
| similar to enhancer of split related protein-7                | 0.909872 | 0.821771 | 0.257231 |
| Tubulin, gamma complex associated protein 4                   | 0.838223 | 0.457329 | 0.66484  |
| aldo-keto reductase family 1, member B1 (aldose reductase)    | 1.232925 | 1.655508 | 2.455979 |
| RNA-binding region (RNP1, RRM) containing 3                   |          |          |          |
| RNA-binding region (RNP1, RRM) containing 3                   | 1.113491 | 0.765107 | 0.337207 |
| coiled-coil domain containing 141                             |          | 0.518431 |          |
| SRY (sex determining region Y)-box 18                         | 1.318459 | 0.940059 | 3.482861 |
| ArfGAP with GTPase domain, ankyrin repeat and PH domain 1     |          |          | 5.594456 |
| docking protein 5                                             | 0.655493 | 0.826675 | 0.361261 |
| epithelial membrane protein 2                                 | 1.16404  | 0.765222 | 0.335674 |
| UBA domain containing 2                                       | 0.611137 | 1.214123 |          |
| gap junction protein, delta 2, 36kDa                          | 1.733346 | 1.621671 | 1.115746 |
| vasoactive intestinal peptide receptor 1                      |          |          |          |
| dynactin 5 (p25)                                              | 1.027503 | 1.40891  | 4.591823 |
| poly (ADP-ribose) polymerase family, member 4                 | 0.582244 | 0.58032  | 0.934225 |
| heat shock 70kDa protein 4                                    | 0.894796 | 0.880531 | 0.434673 |
| T-box 5                                                       |          | 0.113529 |          |
| BMS1 homolog, ribosome assembly protein (yeast)               |          |          |          |
| BMS1 homolog, ribosome assembly protein (yeast)               | 1.399223 | 0.819258 | 0.36336  |
| synapsin II                                                   | 0.067483 |          |          |
| DCN1, defective in cullin neddylation 1, domain containing    | 1.144103 | 0.830454 | 2.13619  |
| proline rich 5 (renal)                                        | 1.408028 | 1.582271 | 5.027688 |
| proline rich 5 (renal)                                        | 0.421343 | 0.886052 | 1.466968 |
| Similar to platelet-activating factor acetylhydrolase 2       | 0.488012 |          | 2.082168 |
| platelet-activating factor acetylhydrolase 2, 40kDa           | 1.139586 | 1.12247  | 1.063939 |
| paired-like homeodomain 1                                     | 11.73831 | 1.159551 |          |
| calcium/calmodulin-dependent protein kinase II alpha          | 0.709837 |          | 2.109159 |
| glycolipid transfer protein domain containing 1               |          | 0.437693 | 0.736769 |
| chimerin (chimaerin) 1                                        | 1.429482 | 0.784493 | 0.441406 |
| chimerin (chimaerin) 1                                        | 0.205904 | 1.354845 | 0.262125 |
| RNA polymerase II associated protein 2                        |          | 9.035877 |          |
| RNA polymerase II associated protein 2                        | 1.496263 | 0.92203  | 0.45984  |
| 2,4-dienoyl CoA reductase 1, mitochondrial                    |          | 0.481398 | 1.664122 |
| similar to C-type lectin                                      | 0.50342  | 0.342786 | 1.583418 |
| small nucleolar RNA, H/ACA box 32                             | 0.884472 | 0.859409 | 0.947635 |
| Spermidine/spermine N1-acetyltransferase 1                    | 1.04076  | 0.589012 | 0.210241 |
| hydroxyprostaglandin dehydrogenase 15-(NAD)                   | 1.682427 | 1.323612 | 5.280044 |

|                                                                                     |          |          |          |
|-------------------------------------------------------------------------------------|----------|----------|----------|
| cytochrome P450 3A80                                                                | 1.084197 | 1.960855 | 1.577424 |
| annexin A13                                                                         | 1.469368 | 2.396446 | 4.697372 |
| Yip1 domain family, member 5                                                        |          | 0.103704 | 0.412139 |
| zinc finger and BTB domain containing 25                                            | 0.472351 | 1.194511 | 0.978202 |
| serpin peptidase inhibitor, clade A (alpha-1 antiproteinase, antitrypsin), member 4 |          |          |          |
| Chromosome 9 open reading frame 100                                                 |          | 2.013098 |          |
| meiotic nuclear divisions 1 homolog (S. cerevisiae) /// tripart                     | 0.64409  | 1.402178 | 0.360537 |
| spectrin, beta, non-erythrocytic 1                                                  |          | 0.37187  | 1.561529 |
| chromosome 15 open reading frame 42                                                 | 1.045305 | 1.141466 | 0.62951  |
| DALR anticodon binding domain containing 3                                          | 1.821165 | 1.026188 | 2.814817 |
| DALR anticodon binding domain containing 3                                          | 1.642168 | 1.060442 | 2.820745 |
| chondrolectin                                                                       |          | 0.793414 | 0.24439  |
| alpha thalassemia/mental retardation syndrome X-linked                              | 1.284771 | 0.848106 | 0.354804 |
| fumarylacetoacetate hydrolase (fumarylacetoacetase)                                 |          | 0.674373 | 2.949318 |
| tripartite motif-containing 55                                                      |          |          | 2.204565 |
| platelet derived growth factor D                                                    | 2.054848 | 1.970185 | 3.936215 |
| host cell factor C2                                                                 |          | 0.395319 |          |
| chromosome 17 open reading frame 39                                                 | 2.038223 | 1.11406  | 1.258785 |
| RAD51-like 3 (S. cerevisiae)                                                        | 0.95434  | 1.058705 | 0.450542 |
| family with sequence similarity 77, member D                                        | 3.278224 | 1.023097 | 0.023414 |
| BCL2-associated transcription factor 1                                              | 0.893042 | 1.116359 | 0.527781 |
| retinol dehydrogenase 10 (all-trans)                                                |          | 4.161876 |          |
| family with sequence similarity 149, member A                                       | 3.736622 | 1.354295 | 1.432431 |
| monooxygenase, DBH-like 1                                                           | 0.603432 | 1.736381 | 7.814603 |
| hypothetical protein LOC770574                                                      | 1.638391 | 0.962901 | 0.418004 |
| HEAT repeat containing 2                                                            | 1.245495 | 0.989995 | 0.521408 |
| HEAT repeat containing 2                                                            | 1.097241 | 0.811488 | 2.750116 |
| pinin, desmosome associated protein                                                 | 0.749158 | 0.573087 | 0.827677 |
| JMJD7-PLA2G4B readthrough transcript                                                | 1.625356 | 3.007329 | 0.74404  |
| photopigment melanopsin-like                                                        |          |          | 1.214792 |
| tetraspanin 7                                                                       | 1.468045 | 0.819671 | 3.044519 |
| tetraspanin 7                                                                       | 0.807231 |          |          |
| dolichyl-phosphate (UDP-N-acetylglucosamine) N-acetylglu                            | 0.631607 | 1.077368 | 0.693338 |
| dolichyl-phosphate (UDP-N-acetylglucosamine) N-acetylglucosaminepl                  |          | 0.830025 | 0.387812 |
| eukaryotic translation initiation factor 1B                                         | 1.013838 | 0.986458 | 0.458204 |
| phosphatidic acid phosphatase type 2A                                               | 1.589876 | 1.467832 | 3.373476 |
| Phosphatidic acid phosphatase type 2A                                               | 1.468695 | 1.18965  | 2.035479 |
| SH2 domain containing 4A                                                            | 2.298601 | 1.304923 | 1.71377  |
| Similar to hypothetical protein FLJ38663                                            | 0.742673 | 1.237603 | 0.818514 |
| histidine triad nucleotide binding protein W                                        | 694.6108 | 1.523488 | 0.655596 |

|                                                            |          |          |          |
|------------------------------------------------------------|----------|----------|----------|
| similar to Cyclin F                                        |          | 0.759296 | 0.042482 |
| Hypothetical protein LOC770050                             | 0.063067 | 0.39531  | 0.679587 |
| Hypothetical LOC422005                                     | 0.607068 | 1.023159 | 0.288799 |
| Hypothetical LOC422005                                     | 0.91694  | 1.143379 | 0.582982 |
| spondin 2, extracellular matrix protein                    | 2.129862 | 1.187043 | 0.742587 |
| phosphopantothenoylecysteine decarboxylase                 | 0.846316 | 1.165303 | 0.21887  |
| phosphopantothenoylecysteine decarboxylase                 | 0.861715 | 1.086718 | 0.272423 |
| splicing factor 3a, subunit 1, 120kDa                      | 1.071918 | 0.946702 | 0.724604 |
| similar to AP-2 repressor                                  | 1.174201 | 0.537322 | 0.47273  |
| intraflagellar transport 80 homolog (Chlamydomonas)        | 1.004482 | 0.711076 | 0.493381 |
| itchy homolog E3 ubiquitin protein ligase (mouse)          | 9.336546 | 2.811548 | 0.545588 |
| regulator of G-protein signalling 5                        | 0.447682 | 1.636654 | 0.583881 |
| Cold inducible RNA binding protein                         |          | 0.970214 | 0.053262 |
| chromosome 12 open reading frame 5                         | 1.536714 | 0.930413 | 0.45732  |
| cytidine deaminase                                         | 0.846583 | 0.915353 | 2.223723 |
| ankyrin repeat domain 9                                    | 2.058138 | 0.868449 | 1.836442 |
| leucine proline-enriched proteoglycan (leprecan) 1         | 3.362189 | 1.388109 | 1.024756 |
| myotubularin related protein 14                            | 0.561051 | 1.391121 | 1.89686  |
| pleckstrin homology, Sec7 and coiled-coil domains, binding | 1.587236 | 0.981197 | 2.169735 |
| polymerase I and transcript release factor                 | 1.163641 | 1.352944 | 1.968804 |
| polymerase I and transcript release factor                 | 0.594413 |          | 2.710325 |
| Chromosome 5 open reading frame 3                          | 0.425362 |          |          |
| chromosome 5 open reading frame 3                          | 0.962975 | 1.06118  | 0.611722 |
| RNA binding motif protein 24                               | 2.73165  | 1.241339 | 2.25463  |
| immunoglobulin mu binding protein 2                        |          | 0.459857 |          |
| premature ovarian failure, 1B                              | 1.833401 | 2.021575 | 0.747191 |
| Premature ovarian failure, 1B                              | 17.47757 | 0.581142 | 0.117177 |
| phosphoenolpyruvate carboxykinase                          | 0.484048 | 1.679957 | 1.146816 |
| hypothetical LOC427134                                     | 6.052747 | 2.354407 | 0.170408 |
| RUN and FYVE domain containing 1                           | 1.305327 | 1.090014 | 1.213825 |
| chromobox homolog 7                                        | 0.582097 | 1.203454 | 1.861216 |
| chromosome 4 open reading frame 20                         | 0.512392 | 2.26629  | 0.601205 |
| toll-like receptor 2                                       | 2.445508 | 0.910139 | 0.560168 |
| cyclin H                                                   | 0.563815 | 0.628043 | 2.689304 |
| inositol(myo)-1(or 4)-monophosphatase 1                    | 0.664884 | 1.028872 | 0.062924 |
| AIG2-like domain 1                                         | 0.978079 | 2.123902 |          |
| bromodomain containing 3                                   | 0.468623 | 1.031456 | 0.585965 |
| GDP-mannose pyrophosphorylase B                            | 2.500627 | 0.909908 | 2.528963 |
| peroxisome biogenesis factor 13                            | 1.269341 | 1.114823 | 0.727118 |
| chloride intracellular channel 2                           | 1.677661 | 0.893851 | 2.145801 |



|                                                                           |          |          |          |
|---------------------------------------------------------------------------|----------|----------|----------|
| Hypothetical protein LOC777379                                            | 1.57219  | 0.593885 | 0.142453 |
| tetratricopeptide repeat domain 14                                        | 1.301391 | 0.682318 | 0.383813 |
| ribonuclease P/MRP 30kDa subunit                                          |          | 0.786433 | 0.322463 |
| golgi integral membrane protein 4                                         | 0.663488 | 0.816947 | 0.941733 |
| carbonic anhydrase VB, mitochondrial                                      | 0.065689 | 2.037372 | 0.325948 |
| WD repeat domain 21A                                                      | 3.268496 | 0.707586 | 0.52558  |
| heat shock protein 25                                                     | 2.198658 | 0.941761 | 0.511903 |
| ADP-ribosylation factor-like 4A                                           | 1.159831 | 0.895577 | 2.622251 |
| RAB3B, member RAS oncogene family                                         | 0.911357 | 1.375166 | 2.064321 |
| transmembrane protein 39A                                                 | 0.827074 |          | 0.295952 |
| tumor necrosis factor receptor superfamily, member 18                     | 0.948866 | 1.344155 | 0.472244 |
| ubiquitin specific peptidase 38                                           | 0.998977 | 1.088045 | 0.965516 |
| Hypothetical protein LOC768982                                            | 1.012206 | 0.870857 | 0.146542 |
| v-ral simian leukemia viral oncogene homolog B (ras related               | 0.925436 | 1.198329 | 0.417807 |
| solute carrier family 9 (sodium/hydrogen exchanger), memb                 | 1.305642 | 1.12951  | 0.421935 |
| zinc finger, CCHC domain containing 6                                     | 0.49451  | 1.427824 | 0.905254 |
| homocysteine-inducible, endoplasmic reticulum stress-induc                | 2.031378 | 0.949012 | 0.100186 |
| complement component 1, q subcomponent, C chain                           | 2.572676 | 1.64369  | 3.288132 |
| Purinergic receptor P2Y, G-protein coupled, 13                            | 2.528181 | 1.49588  | 4.355588 |
| colony stimulating factor 2 receptor, alpha, low-affinity (grai           | 1.047897 | 1.140078 | 0.32594  |
| transforming, acidic coiled-coil containing protein 3                     | 0.66849  | 1.268254 | 1.584634 |
| oxidation resistance 1                                                    | 1.634991 | 0.995192 | 1.363369 |
| immunoresponsive 1 homolog (mouse)                                        | 1.69884  | 1.475367 | 126.2908 |
| Solute carrier family 7 (cationic amino acid transporter, y+ system), mei |          | 1.405314 | 0.78581  |
| Solute carrier family 7 (cationic amino acid transporter, y+ s            | 0.936266 | 0.904363 | 2.155723 |
| hypothetical protein LOC770777                                            | 1.806495 | 3.244188 | 7.096649 |
| septin 10                                                                 | 1.922295 | 1.16775  | 2.108561 |
| Anthrax toxin receptor 2                                                  | 3.465678 | 0.722039 | 1.507927 |
| meteorin, glial cell differentiation regulator-like                       | 1.357666 | 1.395529 | 3.071322 |
| mitochondrial ribosomal protein L50                                       | 0.456978 | 1.92448  | 3.884596 |
| chromosome 10 open reading frame 118                                      | 0.537957 | 1.907792 | 3.413466 |
| kelch-like 6 (Drosophila)                                                 | 1.044607 | 0.698477 | 0.438088 |
| platelet/endothelial cell adhesion molecule /// platelet/endoth           | 3.987391 | 0.803001 | 0.649885 |
| Platelet/endothelial cell adhesion molecule                               | 1.38855  | 1.231683 | 0.321404 |
| NIN1/RPN12 binding protein 1 homolog (S. cerevisiae)                      | 0.739144 | 0.944723 | 2.10102  |
| hypothetical gene supported by BX933423                                   |          |          | 0.026324 |
| chromosome 17 open reading frame 62                                       | 0.788789 | 1.300989 | 0.625281 |
| similar to BC039210 protein                                               | 1.739222 | 0.968875 | 4.677564 |
| deleted in malignant brain tumors 1                                       | 2.421762 | 1.621776 | 3.393142 |
| thrombospondin, type I, domain containing 7A                              | 0.776791 | 0.640997 | 3.695375 |

|                                                                     |          |          |          |
|---------------------------------------------------------------------|----------|----------|----------|
| NAD(P) dependent steroid dehydrogenase-like                         | 0.483783 | 1.120032 | 0.837787 |
| PAN3 polyA specific ribonuclease subunit homolog (S. cere           | 1.453432 | 0.626318 | 0.351516 |
| zinc finger protein 652                                             | 0.452649 | 1.115266 | 1.390479 |
| ectonucleoside triphosphate diphosphohydrolase 1                    | 1.017341 | 0.609888 | 26.90203 |
| TBC1 domain family, member 13                                       | 0.840009 | 2.397165 |          |
| annexin A10                                                         | 0.890271 | 1.163227 | 0.398628 |
| RAS, dexamethasone-induced 1                                        | 1.203713 | 2.688214 | 4.303764 |
| WD repeat domain 51A                                                | 0.855241 | 1.22342  | 52.06071 |
| similar to HEXIM1 protein                                           | 0.802112 | 0.714348 | 1.199196 |
| fascin homolog 1, actin-bundling protein (Strongylocentrotu         | 1.069747 | 2.583971 | 1.749559 |
| ubiquinol-cytochrome c reductase binding protein                    | 1.661525 | 1.053233 | 0.193494 |
| Signal recognition particle 19kDa                                   | 0.450097 | 0.927396 | 0.94055  |
| KIAA1712                                                            | 0.623114 | 1.701489 | 1.14019  |
| RAS p21 protein activator 3                                         | 0.785705 | 0.725985 | 0.359791 |
| nuclear factor of kappa light polypeptide gene enhancer in B        | 1.165573 | 1.354698 | 2.384509 |
| fructosamine 3 kinase related protein                               | 0.804069 | 0.781145 | 0.3256   |
| nuclear receptor interacting protein 1                              | 0.780969 | 0.803678 | 0.414422 |
| zinc finger, FYVE domain containing 28                              | 12.27069 |          | 1.375076 |
| chromosome 4 open reading frame 15                                  | 1.386362 | 1.323776 | 0.781411 |
| polymerase (DNA directed) nu                                        | 8.284039 | 0.911197 | 2.648654 |
| Wolf-Hirschhorn syndrome candidate 2                                |          |          |          |
| coxsackie virus and adenovirus receptor                             | 0.979765 | 0.977928 | 0.383237 |
| leucine zipper-EF-hand containing transmembrane protein 1           | 0.702943 | 0.489345 | 1.50247  |
| stem-loop (histone) binding protein                                 | 2.869438 | 1.252018 | 1.398714 |
| MDN1, midasin homolog (yeast)                                       | 0.136221 | 0.671736 | 0.88287  |
| zinc finger protein 704                                             | 0.766062 | 0.85927  | 0.213401 |
| gamma-aminobutyric acid (GABA) receptor, rho 1                      |          | 5.283282 |          |
| aminoacylase 1-like 2                                               | 1.487664 |          | 5.111879 |
| ADAM metallopeptidase with thrombospondin type 1 motif, 1           |          | 1.596154 |          |
| ADAM metallopeptidase with thrombospondin type 1 motif,             | 1.219499 |          | 3.94464  |
| chromosome 6 open reading frame 165                                 | 6.35545  |          |          |
| solute carrier family 7, (cationic amino acid transporter, y+ s     | 0.092189 |          |          |
| E2F transcription factor 5, p130-binding                            | 3.380595 | 1.011269 | 0.794455 |
| 5'-nucleotidase, ecto (CD73)                                        |          | 3.013972 |          |
| protease, serine, 35                                                |          |          |          |
| chromosome 6 open reading frame 157                                 | 0.407832 | 1.577    | 0.244136 |
| ATPase, H <sup>+</sup> transporting, lysosomal 38kDa, V0 subunit D2 |          | 7.124945 | 4.631216 |
| similar to RHACD8-4L                                                |          |          | 0.050338 |
| TTK protein kinase                                                  | 0.792489 | 0.808964 | 0.361587 |
| Leber congenital amaurosis 5                                        | 0.397617 | 1.938997 | 0.655806 |

|                                                                                     |          |          |          |
|-------------------------------------------------------------------------------------|----------|----------|----------|
| receptor-interacting serine-threonine kinase 2                                      | 2.177991 | 0.606618 | 0.41111  |
| similar to CD8 alpha chain /// similar to RHACD8-4L                                 | 0.710464 | 1.072208 | 0.291059 |
| similar to RHACD8-4L /// similar to CD8 alpha chain /// sim                         | 0.398137 | 1.925524 |          |
| similar to CD8 alpha chain /// similar to RHACD8-4L /// sim                         | 1.298912 | 0.770098 | 0.131416 |
| similar to CD8 alpha chain /// similar to RHACD8-4L /// sim                         | 1.028359 | 0.451516 | 0.186803 |
| synaptojanin 1                                                                      | 0.5879   |          | 0.838231 |
| transmembrane protein 64                                                            | 1.684115 | 1.940633 | 6.561656 |
| DEAD (Asp-Glu-Ala-Asp) box polypeptide 43                                           |          | 0.377858 |          |
| hypothetical LOC428371                                                              | 0.779847 | 1.196812 | 0.468787 |
| RNA binding motif protein 12B                                                       | 1.070686 | 1.085836 | 0.252238 |
| protein phosphatase 2C, magnesium-dependent, catalytic subunit                      |          | 0.363142 |          |
| WD repeat domain 76                                                                 | 0.955633 | 1.146185 | 2.129359 |
| regulating synaptic membrane exocytosis 1                                           | 0.848307 | 1.013548 | 4.286289 |
| cadherin 17, LI cadherin (liver-intestine)                                          | 1.858774 | 1.359779 | 2.209592 |
| dpy-19-like 4 (C. elegans)                                                          | 1.830439 | 1.296996 | 0.542125 |
| dpy-19-like 4 (C. elegans)                                                          | 1.378234 | 0.834091 | 0.576699 |
| potassium voltage-gated channel, Isk-related family, member 2                       |          | 8.063368 |          |
| similar to Serine/threonine kinase 3 (STE20 homolog, yeast)                         | 1.144326 | 0.462315 | 0.59108  |
| vacuolar protein sorting 13 homolog B (yeast)                                       | 0.729379 | 1.068339 | 0.49527  |
| regulator of G-protein signalling 22                                                | 0.237945 |          |          |
| F-box protein 43 /// similar to F-box only protein 43 (Endogenous meiotic inhibitor |          |          | 0.179962 |
| sperm associated antigen 1                                                          |          | 0.797974 |          |
| sperm associated antigen 1                                                          | 0.646026 | 1.287825 | 0.360812 |
| ribonucleotide reductase M2 B (TP53 inducible)                                      | 0.524859 | 0.924886 | 0.104561 |
| tetratricopeptide repeat domain 3                                                   | 1.283068 | 0.442279 | 0.615559 |
| potassium inwardly-rectifying channel, subfamily J, member 15                       |          | 1.811375 | 2.210077 |
| forkhead box K2                                                                     | 1.091875 | 0.924638 | 0.435481 |
| brain and acute leukemia, cytoplasmic                                               | 0.448834 |          |          |
| regulating synaptic membrane exocytosis 2                                           | 0.389493 | 1.258233 |          |
| transmembrane 7 superfamily member 4                                                | 1.234933 | 0.930812 | 2.600998 |
| zinc finger protein, multitype 2                                                    |          | 39.99725 |          |
| oxidation resistance 1                                                              | 0.926516 | 1.362334 | 0.430322 |
| exocyst complex component 6B                                                        |          | 9.824823 |          |
| Down syndrome cell adhesion molecule                                                | 0.397681 | 0.807536 |          |
| beta-site APP-cleaving enzyme 2                                                     | 17.8287  |          |          |
| transmembrane protease, serine 2                                                    | 0.352074 |          | 1.032046 |
| C2 calcium-dependent domain containing 2                                            |          |          |          |
| G protein-coupled receptor 20                                                       |          |          | 27.82794 |
| inositol polyphosphate-5-phosphatase, 145kDa                                        |          | 0.439877 |          |
| ubiquitin associated and SH3 domain containing, A                                   | 2.237587 | 1.482746 | 1.330136 |

|                                                                                  |          |          |          |
|----------------------------------------------------------------------------------|----------|----------|----------|
| similar to fibropellin Ia                                                        |          |          | 0.121962 |
| myeloid/lymphoid or mixed-lineage leukemia (trithorax hom                        | 0.387346 | 0.749594 | 0.947593 |
| trafficking protein particle complex 9                                           | 0.812427 | 1.05366  | 0.288065 |
| potassium channel, subfamily K, member 9                                         | 0.499184 |          |          |
| similar to Cystathionine-beta-synthase                                           | 1.024092 | 0.843555 | 2.948457 |
| family with sequence similarity 135, member B                                    | 0.272124 |          |          |
| crystallin, alpha A                                                              |          |          |          |
| ZFAT zinc finger 1                                                               | 2.112331 | 1.771366 | 0.763916 |
| monoamine oxidase B                                                              |          | 2.561508 |          |
| monoamine oxidase B                                                              |          |          |          |
| PHD finger protein 20-like 1                                                     | 0.69967  | 1.087833 | 0.379406 |
| potassium voltage-gated channel, KQT-like subfamily, member 3                    |          | 0.061609 |          |
| otoconin 90                                                                      |          |          |          |
| X-linked Kx blood group                                                          | 13.17846 | 4.252493 |          |
| hypothetical LOC428640                                                           |          | 0.311972 |          |
| hypothetical LOC418592 /// hypothetical protein LOC76843                         | 0.140375 |          |          |
| collagen, type XXI, alpha 1                                                      | 0.158593 |          |          |
| hypocretin (orexin) receptor 2                                                   | 0.175284 | 14.82916 | 1.01453  |
| hypothetical LOC428238                                                           | 14.66986 |          |          |
| adenylate cyclase 8 (brain)                                                      | 0.415885 | 0.046587 |          |
| chromosome 6 open reading frame 142                                              | 0.449458 |          |          |
| kelch-like 31 (Drosophila)                                                       |          |          | 2.596056 |
| hypothetical protein LOC772218                                                   | 2.469252 |          |          |
| kelch-like 15 (Drosophila)                                                       | 1.0867   | 0.729395 | 0.342754 |
| kelch-like 15 (Drosophila)                                                       | 2.214064 | 0.316985 | 0.223077 |
| family with sequence similarity 91, member A1                                    |          | 2.465004 | 1.325455 |
| similar to Acp1 protein                                                          | 1.292296 |          | 6.162565 |
| chromosome 8 open reading frame 32                                               | 0.768005 | 1.083061 | 0.675466 |
| ATPase family, AAA domain containing 2                                           | 0.859549 | 1.179567 | 0.531876 |
| tumor suppressing subtransferable candidate 1                                    | 0.525447 | 1.613409 | 0.28718  |
| tetratricopeptide repeat domain 15                                               | 1.133597 | 0.84746  | 0.602856 |
| radical S-adenosyl methionine domain containing 2                                | 5.18347  | 2.075869 | 5.57553  |
| ring finger protein 144A                                                         |          | 2.85858  |          |
| membrane bound O-acyltransferase domain containing 2                             | 1.082862 | 0.474096 | 0.048742 |
| defective in sister chromatid cohesion 1 homolog (S. cerevis                     | 1.397348 | 1.396676 | 0.3399   |
| TAF2 RNA polymerase II, TATA box binding protein (TBP)-associated factor, 150kDa |          |          |          |
| maternal embryonic leucine zipper kinase                                         | 0.593407 | 1.036222 | 1.161392 |
| hypothetical LOC421935                                                           | 1.831226 | 2.086577 | 0.857244 |
| ATPase, H <sup>+</sup> transporting, lysosomal 42kDa, V1 subunit C2              | 0.525587 |          | 2.201175 |
| ATPase, H <sup>+</sup> transporting, lysosomal 42kDa, V1 subunit C2              | 1.730823 | 2.207982 | 1.765376 |

|                                                                  |          |          |          |
|------------------------------------------------------------------|----------|----------|----------|
| potassium voltage-gated channel, subfamily F, member 1           |          | 7.435446 |          |
| Rho-associated, coiled-coil containing protein kinase 2          | 0.909271 |          | 0.337571 |
| phosphatidylinositol-5-phosphate 4-kinase, type II, beta         |          | 0.370396 |          |
| similar to GREB1 protein                                         |          |          |          |
| similar to egg envelope component ZPAX                           |          |          | 10.24064 |
| potassium voltage-gated channel, delayed-rectifier, subfamily    | 1.190043 | 1.108241 | 0.043728 |
| ATPase family, AAA domain containing 2B                          | 1.460675 | 0.806848 | 0.468824 |
| similar to A830093I24Rik protein                                 |          |          | 0.159641 |
| intersectin 2                                                    | 0.744599 | 0.487397 | 1.645093 |
| zinc finger protein 512                                          |          | 0.694123 |          |
| nuclear receptor binding protein 1                               | 0.654989 | 1.186185 | 1.126152 |
| phosphorylase kinase, alpha 2 (liver)                            | 0.694069 | 0.978115 | 0.793998 |
| dystrobrevin, beta                                               |          | 0.409927 |          |
| cyclin-dependent kinase-like 5                                   |          |          | 3.121144 |
| similar to KIAA1833 protein /// hypothetical protein LOC77       | 0.508999 |          | 1.470211 |
| similar to chromosome X open reading frame 20                    | 1.062283 | 1.772699 | 0.372566 |
| Nance-Horan syndrome (congenital cataracts and dental anomalies) |          | 2.011789 |          |
| RALBP1 associated Eps domain containing 2                        | 0.427501 |          |          |
| selenoprotein I                                                  | 3.088302 |          |          |
| motile sperm domain containing 2                                 | 0.707322 | 0.623881 | 0.398679 |
| RAB9A, member RAS oncogene family                                | 0.902419 | 1.191883 | 0.58986  |
| scavenger receptor class A, member 5 (putative)                  | 1.450361 | 0.820129 | 5.361535 |
| toll-like receptor 7                                             | 2.070571 | 0.958591 | 1.110561 |
| calcium/calmodulin-dependent protein kinase kinase 1, alpha      |          | 6.33802  |          |
| hypothetical protein LOC768434                                   | 0.435324 |          | 1.150065 |
| adenylate cyclase 3                                              |          | 1.256348 |          |
| shroom family member 2                                           | 0.04929  |          |          |
| neurologin 4, X-linked                                           | 0.495492 |          | 0.039231 |
| exostoses (multiple)-like 3                                      | 3.586706 | 1.255018 | 0.948784 |
| integrator complex subunit 9                                     | 0.990224 | 0.512473 | 0.51677  |
| hypothetical LOC427799                                           | 1.538529 |          | 0.18402  |
| arylsulfatase D                                                  | 0.935047 | 1.082381 | 0.052141 |
| chromosome 8 open reading frame 13                               | 0.774694 | 1.437743 | 0.961569 |
| progesterone and adiponectin receptor family member VIII         | 0.726734 | 2.061566 |          |
| CD7 molecule                                                     | 1.28263  | 1.591799 | 2.112591 |
| methylmalonyl Coenzyme A mutase                                  | 0.831634 | 0.923387 | 0.400443 |
| ectonucleotide pyrophosphatase/phosphodiesterase 4 (putative)    | 0.436236 | 1.167462 | 0.279139 |
| GTP binding protein 6 (putative)                                 | 1.057688 | 0.408941 | 1.349958 |
| isochorismatase domain containing 1                              |          | 2.514224 | 1.236208 |
| transmembrane protein 166                                        | 0.5771   | 0.894058 | 0.717482 |

|                                                                                    |          |          |          |
|------------------------------------------------------------------------------------|----------|----------|----------|
| non imprinted in Prader-Willi/Angelman syndrome 1                                  | 1.056362 | 1.165623 | 0.505896 |
| ATPase, class V, type 10A                                                          | 2.888772 | 1.153486 | 3.572105 |
| ATPase, class V, type 10A                                                          | 7.35941  |          | 1.516842 |
| ATPase, class V, type 10A                                                          | 2.114125 | 2.438514 | 1.752747 |
| hypothetical LOC418688                                                             |          |          | 26.53126 |
| mannosyl (alpha-1,3-)-glycoprotein beta-1,4-N-acetylglucosyl transferase           | 1.150292 | 0.732272 | 0.357876 |
| MIT, microtubule interacting and transport, domain containing                      | 1.655257 | 1.076907 | 0.835112 |
| interleukin 1 receptor, type II                                                    | 0.521768 | 0.665372 | 0.392651 |
| interleukin 1 receptor-like 2                                                      | 1.503525 | 1.442069 | 2.514705 |
| interleukin 18 receptor 1                                                          | 3.086522 | 1.174967 | 0.879779 |
| solute carrier family 9 (sodium/hydrogen exchanger), member 1                      | 1.002615 | 1.57125  | 6.632906 |
| major facilitator superfamily domain containing 9                                  | 1.039751 | 0.694876 | 0.646067 |
| UDP-glucuronate decarboxylase 1                                                    | 1.345996 | 1.150328 | 0.286713 |
| mannosidase, endo-alpha-like                                                       | 2.914145 |          |          |
| PCI domain containing 2                                                            | 1.060056 | 0.938143 | 0.369924 |
| similar to Guanine nucleotide exchange factor DBS (DBLs b                          | 3.88562  | 1.539751 | 5.056529 |
| similar to Guanine nucleotide exchange factor DBS (DBLs b                          | 2.888861 | 1.840934 | 2.779066 |
| MCF.2 cell line derived transforming sequence-like                                 | 1.005029 |          | 3.153575 |
| Rho guanine nucleotide exchange factor (GEF) 7                                     | 0.871224 | 2.420838 | 0.925722 |
| solute carrier family 10 (sodium/bile acid cotransporter family)                   | 1.678345 | 2.446437 | 1.1284   |
| sodium leak channel, non-selective                                                 | 1.297083 | 0.789617 |          |
| Epstein-Barr virus induced gene 2 (lymphocyte-specific G protein-coupled receptor) | 1.399294 | 0.843198 | 0.203008 |
| Epstein-Barr virus induced gene 2 (lymphocyte-specific G protein-coupled receptor) | 8.176481 | 2.888663 | 1.966572 |
| serine/threonine kinase 24 (STE20 homolog, yeast)                                  | 0.766884 | 0.929881 | 1.874478 |
| ATP-binding cassette, sub-family C (CFTR/MRP), member 1                            | 6.763999 | 0.95841  |          |
| G protein-coupled receptor 180                                                     | 1.842816 | 0.875783 | 0.52941  |
| ceroid-lipofuscinosis, neuronal 5                                                  | 0.457478 | 3.211181 |          |
| TBC1 domain family, member 4                                                       |          | 0.402579 | 1.309821 |
| protocadherin 20                                                                   | 0.466675 |          |          |
| diaphanous homolog 3 (Drosophila)                                                  | 0.1058   | 0.735749 |          |
| NMDA receptor regulated 1-like                                                     | 1.022558 | 0.813227 | 0.501916 |
| NMDA receptor regulated 1-like                                                     | 1.424652 | 1.250405 | 0.476698 |
| hypothetical LOC428066                                                             | 0.810877 | 1.477171 | 2.193841 |
| diacylglycerol kinase, eta                                                         | 0.395698 |          |          |
| diacylglycerol kinase, eta                                                         | 6.472975 | 0.628613 | 2.065406 |
| tumor necrosis factor (ligand) superfamily, member 11                              |          | 3.660468 | 0.439595 |
| solute carrier family 25, member 30                                                | 0.450943 | 0.839832 | 0.164403 |
| lymphocyte cytosolic protein 1 (L-plastin)                                         | 0.746025 | 2.505786 | 1.589497 |
| succinate-CoA ligase, ADP-forming, beta subunit                                    | 1.125398 | 1.141673 | 0.462342 |
| SET domain, bifurcated 2                                                           |          |          | 6.190028 |

|                                                                             |          |          |          |
|-----------------------------------------------------------------------------|----------|----------|----------|
| SET domain, bifurcated 2                                                    | 0.882977 | 1.130607 | 2.010918 |
| karyopherin alpha 3 (importin alpha 4)                                      | 1.197573 | 0.639902 | 0.267005 |
| dehydrogenase/reductase (SDR family) member 12 /// simila                   | 0.670866 | 0.257293 | 0.916013 |
| ATPase, Cu <sup>++</sup> transporting, beta polypeptide                     | 0.573228 | 0.656171 | 2.253117 |
| component of oligomeric golgi complex 6                                     | 0.781218 | 0.886454 | 0.339308 |
| component of oligomeric golgi complex 6                                     | 0.727253 | 1.201477 | 0.382649 |
| chromosome 13 open reading frame 23                                         | 2.804658 | 0.688334 | 1.057733 |
| stomatin (EPB72)-like 3                                                     | 0.929899 |          | 3.927225 |
| cyclin A1                                                                   |          |          | 0.363269 |
| doublecortin-like kinase 1                                                  |          |          |          |
| StAR-related lipid transfer (START) domain containing 13                    | 1.688091 | 0.452289 |          |
| furry homolog (Drosophila)                                                  | 2.174104 |          | 0.349164 |
| heat shock 105kDa/110kDa protein 1                                          | 0.857908 | 0.666839 | 0.114921 |
| heat shock 105kDa/110kDa protein 1                                          | 0.493807 | 0.330066 |          |
| solute carrier family 7 (cationic amino acid transporter, y <sup>+</sup> sy | 0.680777 | 0.712221 | 2.099314 |
| solute carrier family 46, member 3                                          |          |          | 0.153556 |
| nucleoporin 88kDa                                                           |          |          | 0.165181 |
| ubiquitin specific peptidase 12                                             | 1.620873 | 1.435956 | 2.52447  |
| ATPase, aminophospholipid transporter-like, class I, type 8A, member 2      |          |          | 4.466952 |
| SET binding protein 1                                                       | 2.978781 |          | 2.263374 |
| mitochondrial intermediate peptidase                                        | 1.039503 | 1.226762 | 0.925113 |
| mitochondrial intermediate peptidase                                        | 0.605766 | 1.158002 | 0.474014 |
| protein kinase, AMP-activated, beta 2 non-catalytic subunit                 | 0.196601 | 0.772528 | 0.691333 |
| zinc finger, MYM-type 2                                                     | 1.229274 | 1.133903 | 0.446186 |
| centromere protein J                                                        | 1.095797 | 0.972077 | 0.52923  |
| exophilin 5                                                                 | 27.00298 |          |          |
| exophilin 5 /// KDEL (Lys-Asp-Glu-Leu) containing 2                         | 1.148153 |          | 0.196722 |
| RAB39, member RAS oncogene family                                           | 0.552777 |          | 0.264109 |
| RAB39, member RAS oncogene family                                           | 0.668231 | 0.983671 | 0.408299 |
| guanylate cyclase 1, soluble, alpha 2                                       | 0.880948 |          | 2.047756 |
| aminoadipate-semialdehyde dehydrogenase-phosphopantethe                     | 0.742044 | 1.790937 | 0.065779 |
| aminoadipate-semialdehyde dehydrogenase-phosphopantethe                     |          | 1.388444 | 0.395719 |
| dynein, cytoplasmic 2, heavy chain 1                                        | 0.697905 | 0.791139 | 0.90263  |
| dynein, cytoplasmic 2, heavy chain 1                                        | 1.376576 | 0.581486 | 3.10668  |
| matrix metalloproteinase 1 (interstitial collagenase)                       |          | 0.506765 | 0.105065 |
| hypothetical LOC418990                                                      |          |          | 0.468979 |
| family with sequence similarity 76, member B                                | 1.221044 | 1.074679 | 0.374609 |
| protein phosphatase 2A activator, regulatory subunit 4                      | 1.249328 | 1.503877 | 1.48176  |
| coiled-coil domain containing 67                                            | 0.040174 |          |          |
| solute carrier family 36 (proton/amino acid symporter), mem                 | 0.273323 | 1.099263 | 0.946975 |

|                                                                                    |          |          |          |
|------------------------------------------------------------------------------------|----------|----------|----------|
| Rho guanine nucleotide exchange factor (GEF) 19                                    | 0.069286 |          |          |
| fibroblast growth factor 23                                                        |          |          |          |
| male sterility domain containing 1                                                 |          |          | 0.087176 |
| similar to metalloprotease/disintegrin/cysteine-rich protein                       | 1.428213 |          | 0.046351 |
| polymerase (DNA-directed), delta 3, accessory subunit                              | 0.457474 | 1.134071 | 0.61547  |
| DnaJ (Hsp40) related, subfamily B, member 13                                       |          | 0.323927 |          |
| similar to olfactory receptor, family 52, subfamily R, member 2                    | 0.588584 | 1.174994 | 1.161162 |
| receptor accessory protein 2                                                       | 2.427915 |          |          |
| cAMP-regulated phosphoprotein, 19kDa                                               | 0.51077  | 0.917089 | 0.369024 |
| cAMP-regulated phosphoprotein, 19kDa                                               | 0.712252 | 0.916735 | 0.492577 |
| similar to calcium-activated potassium channel SK3                                 | 1.071127 | 0.812547 |          |
| coiled-coil-helix-coiled-coil-helix domain containing 8                            | 0.455534 | 0.974406 | 2.094057 |
| hypothetical LOC429831                                                             | 0.650028 |          |          |
| olfactory receptor, family 10, subfamily A, member 7                               | 0.587777 | 0.996132 | 2.618546 |
| chromosome 16 open reading frame 35                                                |          | 1.304853 | 0.310384 |
| tudor and KH domain containing                                                     |          | 0.87382  | 0.521542 |
| development and differentiation enhancing factor-like 1                            |          |          |          |
| toll-like receptor 6                                                               | 4.984224 | 1.739063 | 0.476797 |
| similar to toll-like receptor 1 /// toll-like receptor 16 /// toll-like receptor 1 | 2.072388 | 1.084468 | 0.763507 |
| similar to toll-like receptor 1 /// toll-like receptor 16 /// toll-like receptor 1 | 3.382301 | 1.526372 | 2.247171 |
| ligand dependent nuclear receptor corepressor-like                                 | 0.726253 | 0.634373 | 0.395133 |
| hypothetical protein LOC776768                                                     | 1.352689 | 3.723297 | 4.738505 |
| hypothetical protein LOC776768                                                     | 2.136649 | 3.541695 | 2.858468 |
| similar to PINCH-1                                                                 | 0.158055 |          |          |
| WD repeats and SOF1 domain containing                                              | 0.567892 | 1.384912 | 0.291118 |
| tuberous sclerosis 1                                                               | 0.659105 | 0.200314 | 1.248081 |
| hypothetical protein LOC772235                                                     | 1.104472 | 0.774245 | 0.388468 |
| coiled-coil domain containing 83                                                   | 15.43621 | 2.062548 | 0.511305 |
| THUMP domain containing 2                                                          | 1.265702 | 0.812791 | 0.686089 |
| attractin                                                                          | 0.743018 | 1.095256 | 0.328881 |
| attractin                                                                          | 0.709294 |          |          |
| similar to WC1 tail                                                                | 0.559883 | 0.59256  | 0.342603 |
| CD5 molecule-like /// similar to scavenger receptor cysteine-rich type 1           | 0.449879 |          |          |
| fibrillin 2                                                                        | 0.453135 |          |          |
| similar to death receptor 3                                                        | 2.294586 | 0.538375 | 1.120385 |
| glutaminy-peptide cyclotransferase-like                                            | 0.945043 | 0.587119 | 2.221254 |
| progressive external ophthalmoplegia 1                                             | 0.911662 | 3.311179 | 1.305331 |
| similar to Rhomboid family 1 (Drosophila) /// rhomboid 5 homolog                   | 0.923021 | 1.283397 | 0.247545 |
| WWC family member 3                                                                | 1.450674 | 1.121836 | 2.202414 |
| similar to MOV10-like 1 /// similar to Zcwpw2 protein                              | 2.127378 |          |          |



|                                                                           |          |          |          |
|---------------------------------------------------------------------------|----------|----------|----------|
| similar to MOV10-like 1 /// similar to Zcwpw2 protein                     |          |          | 5.616337 |
| F-box protein 38 /// hypothetical LOC426479 /// similar to F.             | 2.862438 | 0.496993 | 1.076097 |
| CDC42 small effector 2                                                    | 0.324991 | 1.511563 | 0.62855  |
| similar to KIAA0540 protein                                               | 0.717267 | 0.856824 | 3.675079 |
| potassium voltage-gated channel, delayed-rectifier, subfamily S, member 2 |          |          | 4.833761 |
| KIAA1324-like                                                             | 0.224764 |          | 1.669258 |
| cylindromatosis (turban tumor syndrome)                                   |          |          | 0.146658 |
| KIAA0802                                                                  |          | 0.448743 |          |
| hypothetical LOC430965                                                    | 3.312936 |          |          |
| zinc finger CCCH-type, antiviral 1                                        | 0.848246 | 1.341443 | 1.707788 |
| small G protein signaling modulator 1                                     | 0.345241 | 1.390506 |          |
| Mdm2, transformed 3T3 cell double minute 2, p53 binding p                 | 1.49208  | 1.545481 | 1.007574 |
| primase, polypeptide 1, 49kDa                                             | 0.485406 | 1.005724 | 0.68348  |
| metastasis suppressor 1                                                   | 2.638116 | 0.824034 | 0.590864 |
| chromosome 20 open reading frame 59                                       | 1.69206  | 0.931617 |          |
| solute carrier family 27 (fatty acid transporter), member 6               |          |          |          |
| NIMA (never in mitosis gene a)-related kinase 2                           | 0.841501 | 1.09847  | 0.425944 |
| MAX interactor 1                                                          | 1.337603 | 1.294147 | 3.986459 |
| nuclear receptor coactivator 7                                            | 1.378457 | 0.992438 | 0.700244 |
| eukaryotic translation initiation factor 2, subunit 3 gamma, 5            | 0.863942 | 1.149727 | 0.79803  |
| TAF8 RNA polymerase II, TATA box binding protein (TBP                     | 1.007684 | 1.069343 | 1.923988 |
| kinesin family member 11                                                  | 0.809584 | 1.102862 | 1.049469 |
| exportin 4                                                                | 0.823845 | 0.985323 | 0.443255 |
| FUS interacting protein (serine/arginine-rich) 1                          | 0.967061 | 0.893214 | 0.574336 |
| uridine monophosphate synthetase (orotate phosphoribosyl t                | 0.683538 | 0.810555 | 0.333572 |
| tumor necrosis factor receptor superfamily, member 18                     | 0.933956 | 1.641738 | 0.429844 |
| matrix metalloproteinase 7 (matrilysin, uterine)                          | 1.491131 | 1.022488 | 1.51583  |
| SH3-domain kinase binding protein 1                                       | 0.806748 | 1.006344 | 0.771867 |
| sorting nexin 13                                                          | 1.095695 | 2.107544 | 1.624944 |
| dynein, cytoplasmic 1, light intermediate chain 2                         | 0.759957 | 0.494012 | 0.779346 |
| solute carrier organic anion transporter family, member 4A1               | 8.00668  |          | 119.3875 |
| spermatogenesis associated 6                                              | 3.383733 |          |          |
| adaptor-related protein complex 3, mu 1 subunit                           | 0.818112 | 1.029072 | 0.68683  |
| splicing factor 3b, subunit 3, 130kDa                                     |          |          | 0.086587 |
| galactokinase 2                                                           | 0.439766 | 1.097955 | 2.124789 |
| chromosome 10 open reading frame 46                                       | 0.966049 | 1.062202 | 0.616341 |
| similar to Tcf-3 co-repressor CtBP                                        | 1.039293 | 0.904482 | 0.591965 |
| zinc finger protein 706                                                   | 1.19779  | 1.005685 | 0.610265 |
| chromosome 14 open reading frame 169                                      | 1.156469 | 1.368605 | 0.691327 |
| CDK2-associated protein 1                                                 | 0.761819 | 0.902805 | 0.489271 |

|                                                                        |          |          |          |
|------------------------------------------------------------------------|----------|----------|----------|
| lysosomal-associated protein transmembrane 4 alpha                     |          | 1.068285 | 0.442124 |
| lysosomal-associated protein transmembrane 4 alpha                     | 1.286955 | 1.222428 | 0.310745 |
| Ras association (RalGDS/AF-6) domain family member 2                   | 1.834941 | 1.272227 | 1.036671 |
| ubiquitin-fold modifier 1                                              | 0.940622 | 1.19986  | 0.344627 |
| USP6 N-terminal like                                                   | 1.137928 | 1.095801 | 0.75506  |
| chromosome 9 open reading frame 41                                     | 1.089955 | 0.850364 | 0.961837 |
| KIAA1524                                                               | 0.678313 | 1.063922 | 0.77604  |
| solute carrier family 25 (mitochondrial carrier; adenine nucle         | 1.077582 | 1.317621 | 2.07505  |
| chromosome 20 open reading frame 24                                    | 0.692731 | 0.940848 | 0.377123 |
| asparagine-linked glycosylation 12 homolog (S. cerevisiae, alpha-1,6-m |          | 0.481868 |          |
| asparagine-linked glycosylation 12 homolog (S. cerevisiae, alpha-1,6-m |          | 0.49003  | 0.662153 |
| TRAF-type zinc finger domain containing 1                              | 2.865745 | 1.310492 | 2.121759 |
| cyclin E2                                                              | 0.726332 | 1.306011 | 0.653343 |
| cyclin E2                                                              | 0.490288 | 1.002587 | 0.469388 |
| ras homolog gene family, member G (rho G)                              | 0.016771 |          | 33.2223  |
| chaperonin containing TCP1, subunit 4 (delta)                          | 0.765134 | 1.245421 | 0.332234 |
| claudin 1                                                              | 1.567063 | 1.38188  | 2.865758 |
| D-dopachrome tautomerase                                               | 9.175349 | 0.31832  | 0.150312 |
| D-dopachrome tautomerase                                               | 1.31076  | 0.513226 | 0.347755 |
| coiled-coil domain containing 5 (spindle associated)                   | 0.238548 | 1.583422 | 1.397302 |
| epsin 2                                                                | 1.028201 | 0.491039 | 0.614143 |
| similar to Sphingomyelin phosphodiesterase, acid-like 3A               | 1.441893 | 1.939592 | 3.60698  |
| H2A histone family, member V                                           | 0.83788  | 1.054592 | 0.567403 |
| chromosome 5 open reading frame 41                                     | 0.811258 | 0.467556 | 0.483479 |
| transducin (beta)-like 3                                               | 1.540576 | 2.705659 | 0.832211 |
| nucleolar protein 5A (56kDa with KKE/D repeat)                         | 0.965169 | 1.011679 | 2.27227  |
| c-mer proto-oncogene tyrosine kinase                                   |          | 0.058709 | 1.415173 |
| chromosome 14 open reading frame 129                                   | 0.785566 | 0.782987 | 0.608282 |
| origin recognition complex, subunit 1-like (yeast)                     | 1.796831 | 1.136744 | 2.48704  |
| cyclin C                                                               | 1.550469 | 0.995425 | 0.4208   |
| WD repeat, sterile alpha motif and U-box domain containing             | 1.78621  | 0.784573 | 0.568403 |
| myosin IG                                                              | 1.04001  | 0.853361 | 2.365695 |
| similar to RIKEN cDNA 4931428F04 gene                                  | 1.566134 | 0.779905 | 4.744235 |
| proline-rich nuclear receptor coactivator 2                            | 0.890492 | 0.997261 | 0.61079  |
| heme binding protein 1                                                 | 1.436182 | 1.476646 | 1.757391 |
| karyopherin alpha 2 (RAG cohort 1, importin alpha 1)                   | 0.691063 | 1.233969 | 0.799614 |
| synovial sarcoma translocation, chromosome 18                          | 1.341894 | 0.880444 | 0.490372 |
| RNA binding motif protein 24                                           | 2.448491 | 1.144278 | 2.534897 |
| 15 kDa selenoprotein                                                   | 1.654364 | 1.067838 | 0.37666  |
| chromosome 18 open reading frame 22                                    | 0.973767 | 0.771253 | 0.657454 |

|                                                             |          |          |          |
|-------------------------------------------------------------|----------|----------|----------|
| Hypothetical protein LOC769469                              | 1.135873 | 1.318124 | 3.017607 |
| cytochrome b5 reductase 4                                   | 0.866768 | 0.882779 | 0.78364  |
| clathrin interactor 1                                       | 1.453994 | 1.07652  | 2.010958 |
| E2F transcription factor 6                                  | 1.512489 | 1.08197  | 0.694613 |
| WD repeat domain 51B                                        | 1.073013 | 1.17862  | 0.294829 |
| similar to Auh protein                                      | 0.805236 | 0.863712 | 3.790608 |
| PCI domain containing 2                                     | 0.831297 | 1.147582 | 0.15392  |
| zinc finger protein 384                                     | 0.790432 | 0.449188 | 1.529451 |
| zinc finger protein 313                                     | 0.840616 | 0.740209 | 0.497486 |
| integrin, alpha 9                                           | 0.67048  | 1.826207 | 2.190947 |
| chromosome 16 open reading frame 75                         | 1.711818 | 1.31997  | 2.925587 |
| primase, DNA, polypeptide 2 (58kDa)                         | 0.329548 | 2.397382 | 0.314654 |
| splicing factor, arginine/serine-rich 18                    | 2.096923 | 0.761736 | 0.482435 |
| cAMP-regulated phosphoprotein, 19kDa                        | 0.837709 | 1.013093 | 0.41128  |
| pleckstrin homology domain containing, family F (with FYV   | 1.157599 | 2.600837 | 1.482169 |
| pleckstrin homology domain containing, family F (with FYV   | 1.04064  | 0.956232 | 0.809015 |
| RNA U, small nuclear RNA export adaptor (phosphorylation    | 0.706616 | 0.818885 | 0.845366 |
| Rho guanine nucleotide exchange factor (GEF) 3              | 0.985539 | 0.952075 | 0.430854 |
| progesterone receptor membrane component 2                  | 0.980844 | 1.267447 | 0.385545 |
| progesterone receptor membrane component 2                  | 0.938122 | 1.572646 | 0.350083 |
| dymeclin                                                    | 0.47866  | 0.890661 | 1.789772 |
| threonyl-tRNA synthetase                                    | 0.540249 | 1.128303 | 2.097912 |
| lymphocyte cytosolic protein 1 (L-plastin)                  | 1.068838 | 1.40648  | 2.241243 |
| glycosyltransferase 1 domain containing 1                   | 2.322277 | 1.621146 | 6.185924 |
| early growth response 1                                     | 1.642747 | 0.718556 | 0.524935 |
| inositol hexakisphosphate kinase 2                          | 0.869538 | 0.925886 | 0.457201 |
| stem-loop (histone) binding protein                         | 2.944013 | 1.334555 | 2.250091 |
| Nedd4 binding protein 3                                     | 0.80485  | 0.824296 | 2.031407 |
| similar to cytochrome b-5 reductase                         | 0.394973 | 1.511293 | 0.580487 |
| ring finger protein 20                                      | 0.426343 | 0.748146 | 1.938436 |
| IKAROS family zinc finger 5 (Pegasus)                       | 1.116699 | 0.775805 | 0.497377 |
| ADP-ribosylation factor-like 13B                            | 2.126533 | 0.95715  | 0.393202 |
| centrosomal protein 55kDa                                   | 0.329505 | 1.345253 | 0.881942 |
| similar to SRF-related protein                              | 0.926401 | 0.672479 | 1.78472  |
| similar to SRF-related protein                              | 1.082727 | 0.807785 | 1.376955 |
| GUF1 GTPase homolog (S. cerevisiae)                         | 1.63531  | 0.832552 | 0.604503 |
| SAP domain containing ribonucleoprotein                     | 0.744977 |          | 3.56887  |
| capping protein (actin filament) muscle Z-line, alpha 1     | 1.197004 | 0.931101 | 0.269934 |
| APAF1 interacting protein                                   | 0.882246 | 0.746627 | 0.218168 |
| SWI/SNF related, matrix associated, actin dependent regulat | 0.671231 | 1.018131 | 0.435915 |

|                                                                          |          |          |          |
|--------------------------------------------------------------------------|----------|----------|----------|
| similar to gamma filamin protein                                         | 35.32156 |          |          |
| twinfilin, actin-binding protein, homolog 1 (Drosophila)                 | 3.453667 | 0.348873 | 3.517727 |
| similar to chromosome 7 open reading frame 28B; CGI-43 li                | 1.141073 | 0.968044 | 0.526443 |
| death inducer-obliterators 1                                             | 1.303073 | 0.892611 | 0.687866 |
| YTH domain family, member 3                                              | 1.013571 | 0.886622 | 0.587138 |
| solute carrier family 7 (cationic amino acid transporter, y+ sy          | 1.105917 | 1.548776 | 0.397124 |
| coronin 7 /// mitochondria-associated protein involved in gra            | 1.068939 | 0.877749 | 3.416102 |
| fucosyltransferase 3 (galactoside 3(4)-L-fucosyltransferase, Lewis blood |          | 0.386193 |          |
| prolyl 4-hydroxylase, alpha polypeptide II                               | 1.392244 | 1.032863 | 1.448208 |
| globoside alpha-1,3-N-acetylgalactosaminyltransferase 1                  | 1.091026 | 0.811299 | 1.146331 |
| intraflagellar transport 52 homolog (Chlamydomonas)                      | 1.10363  | 0.40295  | 0.432648 |
| transmembrane protein 59                                                 | 0.630007 | 0.847266 | 0.281584 |
| CD36 molecule (thrombospondin receptor)                                  | 1.692145 | 1.452296 | 3.215609 |
| G protein-coupled receptor 158                                           | 0.763199 |          |          |
| potassium channel, subfamily K, member 1                                 |          | 3.128731 |          |
| synaptotagmin binding, cytoplasmic RNA interacting protein               | 1.30188  | 1.200073 | 0.762241 |
| SLIT-ROBO Rho GTPase activating protein 3                                |          | 1.014024 | 7.148929 |
| ARP6 actin-related protein 6 homolog (yeast)                             | 0.653196 | 1.247991 | 0.229873 |
| chromosome 1 open reading frame 57                                       | 1.208184 | 1.169128 | 0.366206 |
| chromosome 1 open reading frame 107                                      | 0.052778 | 0.776686 | 0.678035 |
| splicing factor, arginine/serine-rich 5                                  |          |          | 0.027463 |
| damage-specific DNA binding protein 1, 127kDa                            | 0.907873 | 0.924251 | 1.883148 |
| Bruton agammaglobulinemia tyrosine kinase                                | 1.329407 | 1.262047 | 2.040343 |
| G1 to S phase transition 1                                               | 0.550232 | 1.402784 | 0.446763 |
| eukaryotic translation initiation factor 3, subunit H                    | 0.644549 | 1.118692 | 0.526305 |
| purinergic receptor P2Y, G-protein coupled, 10                           |          | 0.657569 | 0.167416 |
| dolichyl pyrophosphate phosphatase 1                                     | 2.05958  |          |          |
| F-box protein 22                                                         |          |          | 1.264447 |
| vacuolar protein sorting 53 homolog (S. cerevisiae)                      | 1.325588 | 0.768755 | 0.706262 |
| kelch-like 9 (Drosophila)                                                | 1.260296 | 1.342913 | 2.269216 |
| fumarate hydratase                                                       | 0.819307 | 1.490653 | 0.769277 |
| ankyrin repeat domain 10                                                 | 1.777589 | 0.714634 | 0.516058 |
| oxysterol binding protein-like 2                                         | 0.780999 | 0.882178 | 0.378557 |
| mitochondrial ribosomal protein L50                                      | 0.38617  | 0.968113 | 1.558272 |
| guanine nucleotide binding protein (G protein), beta polypep             | 1.646444 |          | 0.388643 |
| ST3 beta-galactoside alpha-2,3-sialyltransferase 5                       | 2.337174 | 1.126294 | 0.020416 |
| ST3 beta-galactoside alpha-2,3-sialyltransferase 5                       | 0.722998 | 0.606878 | 0.111883 |
| similar to Transcription factor 12 (Transcription factor HTF-            | 0.345609 | 0.173689 |          |
| DEAD (Asp-Glu-Ala-Asp) box polypeptide 47                                | 0.840754 | 1.135984 | 1.339975 |
| myosin IC                                                                | 3.10553  | 1.922481 | 2.672028 |

|                                                                |          |          |          |
|----------------------------------------------------------------|----------|----------|----------|
| dihydrofolate reductase                                        | 0.329476 | 1.275637 | 1.248272 |
| neuralized homolog (Drosophila)                                | 2.158626 | 1.937197 | 1.513631 |
| phosducin-like 3                                               |          |          | 0.021362 |
| G patch domain containing 1                                    | 0.51762  | 0.719081 | 0.376689 |
| RAP1, GTP-GDP dissociation stimulator 1                        | 1.277125 | 0.850264 | 0.728808 |
| LIM and senescent cell antigen-like domains 1 /// hypothetical | 0.393305 | 1.852131 | 2.051606 |
| heterogeneous nuclear ribonucleoprotein M                      | 0.773796 | 0.778584 | 0.373955 |
| phosphoinositide-3-kinase, regulatory subunit 4, p150          | 0.174149 | 3.881553 |          |
| phosphoinositide-3-kinase, regulatory subunit 4, p150          | 0.847128 | 0.957598 | 0.704348 |
| proteasome (prosome, macropain) activator subunit 4            | 0.653497 | 1.069417 | 1.386172 |
| heat shock 60kDa protein 1 (chaperonin) /// similar to similar | 0.895323 | 1.088285 | 0.587079 |
| tripartite motif-containing 8                                  | 1.031258 | 0.884992 | 1.4598   |
| family with sequence similarity 13, member C1                  | 0.737674 | 2.082852 | 0.334494 |
| Similar to pancreatic intrinsic factor                         | 2.389428 |          |          |
| alpha-methylacyl-CoA racemase                                  | 0.821548 | 1.172795 | 2.504289 |
| prosaposin                                                     | 1.498536 | 1.154635 | 0.428273 |
| acyl-Coenzyme A dehydrogenase, C-2 to C-3 short chain          | 1.204788 | 0.861407 | 0.565306 |
| vacuolar protein sorting 35 homolog (S. cerevisiae)            | 1.053368 | 1.054833 | 0.884871 |
| staufen, RNA binding protein, homolog 2 (Drosophila)           | 1.546998 | 0.735946 | 0.685581 |
| nuclear transcription factor Y, beta                           | 0.751827 | 0.805864 | 0.384987 |
| nephroblastoma overexpressed gene                              | 0.044746 |          |          |
| phytanoyl-CoA 2-hydroxylase interacting protein-like           | 0.803131 | 1.263194 | 0.424488 |
| succinate-CoA ligase, GDP-forming, beta subunit                | 0.290383 | 106.7644 | 809.5533 |
| arginine and glutamate rich 1                                  | 1.578526 | 0.790851 | 0.383083 |
| LSM14A, SCD6 homolog A (S. cerevisiae)                         | 1.04957  | 0.828615 | 0.380369 |
| catalase                                                       | 0.271956 | 0.901679 | 2.534438 |
| amyloid beta (A4) precursor protein-binding, family B, mem     | 0.801389 | 0.826642 | 0.515024 |
| transcription factor 3 (E2A immunoglobulin enhancer bindin     | 1.141485 | 0.707839 | 0.246156 |
| forkhead box M1                                                | 1.128062 | 0.997547 | 0.394988 |
| tumor necrosis factor receptor superfamily, member 1B          | 1.250094 | 1.541355 | 3.218207 |
| mitogen-activated protein kinase kinase 3                      | 0.490751 |          | 0.455443 |
| ORAI calcium release-activated calcium modulator 1             | 0.971726 | 1.029282 | 1.473459 |
| transducin (beta)-like 1 X-linked receptor 1                   | 1.034099 | 0.913675 | 2.211594 |
| chromosome 1 open reading frame 69                             | 1.003608 | 0.891264 | 1.27376  |
| MANSC domain containing 1                                      | 1.362118 | 1.354964 | 1.572014 |
| muscleblind-like (Drosophila)                                  | 0.822118 | 1.032378 | 2.514712 |
| leucine zipper and CTNNBIP1 domain containing                  | 1.033271 | 0.87501  | 0.581603 |
| tRNA 5-methylaminomethyl-2-thiouridylate methyltransfera       | 0.867928 | 0.895718 | 1.913146 |
| TEK tyrosine kinase, endothelial (venous malformations, mu     | 0.894523 | 1.526033 | 3.350663 |
| deoxycytidine kinase                                           | 0.433017 | 0.906453 | 0.48853  |

|                                                                                       |          |          |          |
|---------------------------------------------------------------------------------------|----------|----------|----------|
| arrestin domain containing 1                                                          | 2.658875 | 2.09886  | 3.085698 |
| arrestin domain containing 1                                                          | 3.519953 | 1.311534 | 2.763842 |
| FK506 binding protein 5                                                               | 0.68643  | 1.498547 | 9.836465 |
| centromere protein L                                                                  | 1.063629 | 1.059574 | 0.805528 |
| YTH domain containing 2                                                               |          |          | 0.477993 |
| rogdi homolog (Drosophila)                                                            | 2.290957 | 1.081149 | 0.746668 |
| PMS1 postmeiotic segregation increased 1 (S. cerevisiae)                              | 0.747585 | 0.713091 | 0.32834  |
| similar to Splicing factor, arginine/serine-rich 5 (Pre-mRNA                          | 1.103132 | 0.958538 | 0.539004 |
| DnaJ (Hsp40) homolog, subfamily B, member 14                                          | 0.792116 | 0.794697 | 2.004612 |
| similar to MRC OX-2 antigen homolog                                                   | 1.468487 | 0.75908  | 0.482826 |
| HAUS augmin-like complex, subunit 6                                                   | 0.470649 | 1.267564 | 1.355064 |
| ras homolog gene family, member F (in filopodia)                                      | 2.392261 | 0.851747 | 1.670245 |
| protein inhibitor of activated STAT, 2                                                | 0.406087 | 0.78706  |          |
| similar to nuclear cap binding protein subunit 2; nuclear cap                         | 0.644101 | 0.991553 | 0.439108 |
| chromosome 20 open reading frame 11                                                   | 1.287166 | 0.970286 | 0.462473 |
| quinoid dihydropteridine reductase                                                    | 0.887475 | 0.829851 | 0.496067 |
| trafficking protein particle complex 2                                                | 0.995728 | 1.837551 | 0.498659 |
| trafficking protein particle complex 2                                                | 1.12133  | 2.213122 | 1.028027 |
| family with sequence similarity 53, member A                                          | 0.781756 | 0.880541 | 0.277276 |
| progesterone receptor membrane component 1                                            | 1.144731 | 1.353815 | 1.810696 |
| cyclin-dependent kinase 9                                                             | 0.697033 | 1.385293 | 0.76286  |
| similar to immunoglobulin-like receptor CHIR-B2 precursor                             | 0.718483 |          | 0.612128 |
| zinc finger CCCH-type containing 15                                                   | 1.360446 | 1.127166 | 0.339252 |
| transient receptor potential cation channel, subfamily C, member 4 associated protein |          |          |          |
| ligase IV, DNA, ATP-dependent                                                         | 0.879278 | 0.671493 | 0.110501 |
| FtsJ homolog 3 (E. coli)                                                              | 0.908849 | 0.830688 | 2.847834 |
| membrane bound O-acyltransferase domain containing 2                                  | 1.067029 | 0.088557 | 0.149757 |
| CD200 molecule                                                                        | 0.91805  | 0.818142 | 0.662653 |
| tyrosine 3-monooxygenase/tryptophan 5-monooxygenase act                               | 0.950522 | 0.849385 | 0.475171 |
| CLPTM1-like                                                                           | 1.222271 | 1.490033 | 2.294933 |
| round spermatid basic protein 1                                                       | 2.076368 | 1.245502 | 0.387998 |
| glycosyltransferase 8 domain containing 3                                             | 1.162553 | 0.910878 | 0.39752  |
| syntaxin 17                                                                           | 0.968955 | 1.408864 | 0.732871 |
| calcium/calmodulin-dependent protein kinase (CaM kinase)                              | 1.72858  | 1.39937  | 0.348976 |
| kinesin family member 20A                                                             | 0.895088 | 0.959258 | 0.410628 |
| DNA2 DNA replication helicase 2-like (yeast)                                          | 0.941914 | 1.64224  | 0.918593 |
| mitochondrial ribosomal protein L51                                                   | 0.984104 | 1.00583  | 0.551677 |
| low density lipoprotein receptor-related protein 5                                    | 1.586788 | 0.589128 | 1.174819 |
| 5'-nucleotidase, cytosolic III-like                                                   | 1.379364 | 1.258428 | 3.141409 |
| high-mobility group 20A                                                               | 0.841478 | 1.098354 | 0.474574 |

|                                                               |          |          |          |
|---------------------------------------------------------------|----------|----------|----------|
| O-linked N-acetylglucosamine (GlcNAc) transferase (UDP-1      | 2.334001 | 0.781576 | 0.270739 |
| membrane bound O-acyltransferase domain containing 1          |          | 1.645811 | 2.402727 |
| similar to ADP-ribosylation factor-like 10B /// sperm adhesio | 0.571928 | 1.136951 | 0.414927 |
| KRR1, small subunit (SSU) processome component, homolo        | 1.096642 | 0.822457 | 0.591751 |
| ubiquitin specific peptidase 4 (proto-oncogene)               | 1.0536   | 1.099791 | 0.571324 |
| leucine rich repeat and Ig domain containing 2                |          |          |          |
| ribosomal RNA processing 12 homolog (S. cerevisiae)           | 0.990461 | 1.096152 | 2.332565 |
| N-acetylneuraminate pyruvate lyase (dihydrodipicolinate syr   | 0.948282 | 1.518264 | 2.463118 |
| N-acetylneuraminate pyruvate lyase (dihydrodipicolinate syr   | 0.961903 | 1.121279 | 4.239685 |
| lysophosphatidylglycerol acyltransferase 1                    | 1.073283 | 1.292423 | 2.824029 |
| nudix (nucleoside diphosphate linked moiety X)-type motif 1   | 0.571378 | 1.138989 | 0.691551 |
| ATPase, class II, type 9B                                     | 2.870602 | 0.768837 |          |
| ATPase type 13A4                                              | 2.152097 |          |          |
| cysteine-rich PDZ-binding protein                             | 1.153541 | 1.06576  | 0.474516 |
| proprotein convertase subtilisin/kexin type 7                 | 0.841689 | 1.251695 | 2.996422 |
| minichromosome maintenance complex component 6                | 1.655633 | 1.864724 | 2.540409 |
| minichromosome maintenance complex component 6                | 0.784761 | 1.535603 | 0.821638 |
| succinate-CoA ligase, ADP-forming, beta subunit               | 1.113092 | 1.076112 | 0.185043 |
| KIAA1128                                                      |          |          | 1.968674 |
| Hypothetical LOC416414                                        | 0.934322 | 0.812017 | 0.425397 |
| transglutaminase 4 (prostate)                                 | 4.723535 |          | 2.89923  |
| family with sequence similarity 102, member A                 | 0.531108 | 1.113458 | 1.789026 |
| major vault protein                                           | 1.194885 | 0.983026 | 1.383682 |
| coiled-coil domain containing 43                              | 1.749523 | 0.281277 | 1.634417 |
| spastin                                                       | 1.421421 | 0.740301 | 0.345141 |
| arylsulfatase family, member K                                | 0.75586  | 0.953847 | 2.355924 |
| chromosome 9 open reading frame 3                             | 0.928561 |          |          |
| stromal cell derived factor 4                                 | 1.117654 | 1.264129 | 2.07673  |
| alcohol dehydrogenase 5 (class III), chi polypeptide          | 0.595298 | 1.011935 | 0.448397 |
| hypothetical protein LOC769855                                | 2.108607 | 0.736153 | 5.328231 |
| hypothetical protein LOC769855                                | 1.228709 | 0.911003 | 0.417972 |
| StAR-related lipid transfer (START) domain containing 4       | 0.510595 | 1.014206 | 0.886818 |
| golgi reassembly stacking protein 1, 65kDa                    | 0.987047 | 0.469256 | 1.466155 |
| ecotropic viral integration site 2A                           | 2.029688 | 1.033013 | 1.273314 |
| golgi SNAP receptor complex member 1                          | 1.214524 | 0.858824 | 0.64073  |
| glutamate receptor, ionotropic, delta 1                       | 0.378712 | 0.848411 | 1.794029 |
| solute carrier family 47, member 1                            | 0.874463 | 1.572557 | 6.04019  |
| inhibitor of growth family, member 3                          | 1.232253 | 0.801481 | 0.486132 |
| exocyst complex component 2                                   | 5.37314  | 0.767716 | 0.701972 |
| ras homolog gene family, member A                             | 0.687542 | 1.302097 | 0.317286 |

|                                                               |          |          |          |
|---------------------------------------------------------------|----------|----------|----------|
| protein-O-mannosyltransferase 1                               | 0.822739 | 0.6553   | 0.261684 |
| polymerase (DNA-directed), delta 3, accessory subunit         | 0.784898 | 1.737646 | 0.734459 |
| matrix metalloproteinase 24 (membrane-inserted)               | 0.905979 | 1.045942 | 2.143128 |
| chromosome 1 open reading frame 144                           | 0.430487 | 1.05756  | 0.38657  |
| protein disulfide isomerase family A, member 4                | 0.649843 | 114.564  | 0.996228 |
| dynactin 3 (p22)                                              | 0.384862 | 1.10963  | 1.489825 |
| glutamate receptor, ionotropic, delta 1                       | 0.80888  | 0.772246 | 0.270819 |
| toll interacting protein                                      | 0.851772 | 1.107109 | 0.460715 |
| eukaryotic translation initiation factor 4A, isoform 2        | 1.034085 | 1.026891 | 0.384737 |
| pelota homolog (Drosophila)                                   | 0.459239 | 1.097887 | 1.416338 |
| l(3)mbt-like 3 (Drosophila)                                   | 0.62075  |          | 0.200378 |
| 3-hydroxybutyrate dehydrogenase, type 1                       | 0.7704   | 1.167376 | 0.568555 |
| transmembrane protein 194B                                    | 1.104417 | 0.834213 | 2.08634  |
| PDZ and LIM domain 7 (enigma)                                 | 1.36529  | 1.100855 | 0.877287 |
| GTPase activating Rap/RanGAP domain-like 3                    | 0.832221 | 0.745597 | 0.304563 |
| general transcription factor IIIC, polypeptide 6, alpha 35kDa | 1.260442 | 1.238877 | 1.996912 |
| solute carrier family 25 (mitochondrial carrier, brain), memb | 1.105164 | 1.559116 | 0.670682 |
| pantothenate kinase 3                                         |          | 0.806014 | 0.3723   |
| family with sequence similarity 125, member A                 | 1.128127 | 0.250585 | 1.079552 |
| KIAA1609                                                      | 1.692135 | 0.854103 | 2.640689 |
| 3-hydroxy-3-methylglutaryl-Coenzyme A reductase               | 0.902223 | 1.597336 | 0.386496 |
| PQ loop repeat containing 2                                   | 1.539906 | 1.246164 | 1.957145 |
| pericentrin                                                   | 0.661706 | 0.763285 | 1.551682 |
| denticleless homolog (Drosophila)                             | 1.688895 | 1.14419  | 0.779468 |
| split hand/foot malformation (ectrodactyly) type 1            | 0.92457  | 1.252268 | 0.182566 |
| split hand/foot malformation (ectrodactyly) type 1            | 0.93426  | 1.127206 | 0.373989 |
| phospholipid scramblase 1                                     | 1.837283 | 1.660324 | 1.56436  |
| cat eye syndrome chromosome region, candidate 1               | 2.507049 | 1.004904 |          |
| chromosome 10 open reading frame 119                          | 1.069939 | 1.159656 | 0.565835 |
| POU class 2 associating factor 1                              | 4.187156 | 17.85227 | 47.70974 |
| kelch-like 15 (Drosophila)                                    | 1.054562 | 0.623517 | 0.362948 |
| transmembrane protein 208                                     | 0.494567 | 0.985999 | 2.465074 |
| nucleolar complex associated 2 homolog (S. cerevisiae)        | 0.779659 | 1.244053 | 3.544006 |
| receptor-interacting serine-threonine kinase 2                | 2.158036 | 1.428436 | 0.959755 |
| lectin, galactoside-binding, soluble, 8 (galectin 8)          | 0.363695 | 0.94992  | 0.55335  |
| casein kinase 1, gamma 1                                      | 0.630209 | 0.935114 | 0.463326 |
| similar to Protein C18orf1                                    | 1.364084 | 2.661833 | 8.993832 |
| zinc finger, AN1-type domain 5                                | 0.549548 | 0.911307 | 2.616857 |
| centrosomal protein 170kDa                                    | 2.2501   | 1.071012 | 0.350642 |
| UBA domain containing 2                                       | 0.742631 | 1.082577 | 0.48673  |



|                                                              |          |          |          |
|--------------------------------------------------------------|----------|----------|----------|
| serum/glucocorticoid regulated kinase family, member 3       | 0.78412  | 1.021876 | 0.438943 |
| excision repair cross-complementing rodent repair deficiency | 0.630394 | 1.034672 | 0.458723 |
| potassium channel tetramerisation domain containing 7        | 0.681403 | 2.078952 | 1.472949 |
| diaphanous homolog 1 (Drosophila)                            | 1.853557 | 0.840155 | 0.462929 |
| fibronectin type III domain containing 3A                    | 1.439949 | 1.324479 | 1.836851 |
| family with sequence similarity 96, member A                 | 4.598352 |          |          |
| replication factor C (activator 1) 3, 38kDa                  | 0.982211 | 1.137545 | 0.56642  |
| similar to T cell receptor alpha                             | 3.048135 | 0.690566 | 0.315266 |
| calcium activated nucleotidase 1                             | 0.744964 | 1.098484 | 1.559846 |
| solute carrier family 25, member 32                          | 0.797869 | 1.290831 | 2.002772 |
| dihydroxyacetone kinase 2 homolog (S. cerevisiae)            | 0.673929 | 1.242908 | 0.730659 |
| dCMP deaminase                                               | 0.936159 | 0.929013 | 0.721086 |
| neuroepithelial cell transforming gene 1                     | 1.0651   | 1.166281 | 3.30603  |
| origin recognition complex, subunit 2-like (yeast)           | 1.392779 | 1.251453 | 2.17778  |
| centromere protein O                                         | 0.773545 | 0.811679 | 0.679436 |
| NSFL1 (p97) cofactor (p47)                                   | 1.584932 | 1.333368 | 1.751095 |
| ligand dependent nuclear receptor corepressor-like           |          |          |          |
| serine/threonine kinase 4                                    | 0.856781 | 1.054894 | 3.610053 |
| tRNA methyltransferase 6 homolog (S. cerevisiae)             | 0.237708 | 0.096747 | 0.319162 |
| claudin domain containing 1                                  | 0.928321 | 0.654864 | 0.280782 |
| coiled-coil domain containing 13                             | 0.926119 | 2.605864 | 2.250842 |
| similar to transcript expressed during hematopoiesis 2       | 0.898817 | 0.689656 | 1.664877 |
| sterile alpha motif domain containing 11                     | 0.511067 | 0.947965 | 2.387522 |
| tyrosylprotein sulfotransferase 2                            | 0.986039 | 0.868141 | 0.654914 |
| survival of motor neuron protein interacting protein 1       | 2.060169 | 0.785957 | 0.880056 |
| coiled-coil domain containing 5 (spindle associated)         | 0.337295 | 1.295403 | 1.369077 |
| hypothetical protein LOC422090                               | 0.827898 | 0.785499 | 0.831194 |
| aspartylglucosaminidase                                      | 1.13733  | 2.201377 | 1.70894  |
| dual specificity phosphatase 10                              | 2.1656   | 1.19898  | 6.043369 |
| cytoskeleton associated protein 2                            | 0.910106 | 1.458843 | 0.430433 |
| similar to BC027088 protein                                  | 0.772772 | 1.019014 | 1.066397 |
| SERTA domain containing 2                                    | 0.344798 | 0.939344 | 2.432853 |
| transmembrane protein 68                                     | 1.418693 | 1.082979 | 0.456404 |
| acidic (leucine-rich) nuclear phosphoprotein 32 family, mem  | 0.613652 | 1.152733 | 0.510086 |
| Ran GTPase activating protein 1                              | 0.812051 | 0.795253 | 1.362264 |
| adrenergic, beta, receptor kinase 1                          | 0.868918 | 1.045635 | 1.679466 |
| loss of heterozygosity, 12, chromosomal region 1             | 1.003272 | 0.79914  | 2.101255 |
| cerebellar degeneration-related protein 2, 62kDa             | 1.494798 | 0.86937  | 0.205467 |
| spleen tyrosine kinase                                       | 1.980032 | 1.292847 | 0.463727 |
| similar to immunoglobulin-like receptor CHIR-B2 precursor    | 1.634433 | 0.885104 | 3.640183 |

|                                                                                 |          |          |          |
|---------------------------------------------------------------------------------|----------|----------|----------|
| solute carrier family 12 (potassium/chloride transporters), member 12           | 0.817002 | 0.782743 | 0.757446 |
| neutrophil cytosolic factor 4, 40kDa                                            | 2.172879 | 1.285741 | 0.927506 |
| poly(A)-specific ribonuclease (deadenylation nuclease)                          | 1.020763 | 1.102824 | 0.878487 |
| AT rich interactive domain 5B (MRF1-like)                                       | 1.530687 | 1.437492 | 1.791521 |
| nudix (nucleoside diphosphate linked moiety X)-type motif 1                     | 0.988785 | 0.979288 | 0.501101 |
| glutamyl-tRNA synthetase 2, mitochondrial (putative)                            | 0.767977 | 1.441495 | 1.745926 |
| family with sequence similarity 76, member A                                    | 0.771718 | 0.835475 | 0.426698 |
| splicing factor, arginine/serine-rich 6                                         | 1.181637 | 0.939689 | 0.799464 |
| NADH dehydrogenase (ubiquinone) Fe-S protein 1, 75kDa (similar to C6orf37)      | 0.520403 | 7.33346  | 14.84032 |
| GA binding protein transcription factor, alpha subunit 60kDa (similar to GABP1) | 2.829796 | 1.635109 | 2.106979 |
| RIO kinase 2 (yeast)                                                            | 2.726804 | 0.58036  | 0.212485 |
| REST corepressor 3                                                              | 0.472876 | 0.920992 | 1.040323 |
| RAN binding protein 1                                                           | 1.544747 | 0.939255 | 0.239454 |
| polo-like kinase 1 (Drosophila)                                                 | 0.645453 | 1.122167 | 0.482206 |
| chromosome 9 open reading frame 80                                              | 0.812255 | 1.118553 | 0.909628 |
| hypothetical protein LOC768701                                                  | 0.466391 | 1.297522 | 1.085978 |
| glia maturation factor, beta                                                    | 1.071346 | 1.057542 | 2.02416  |
| RAB GTPase activating protein 1-like                                            | 0.600854 | 1.015475 | 0.080415 |
| liver glycogen phosphorylase                                                    | 0.798769 | 1.402768 | 0.54787  |
| magnesium transporter 1                                                         | 0.871631 | 0.999316 | 1.803276 |
| family with sequence similarity 108, member B1                                  | 0.900313 | 0.982069 | 0.618665 |
| membrane protein, palmitoylated 1, 55kDa                                        | 0.473978 | 1.069241 | 1.530714 |
| C-terminal binding protein 1                                                    | 1.015666 | 2.095842 | 17.24312 |
| 5'-nucleotidase, cytosolic II                                                   | 0.864265 | 0.944158 | 0.346211 |
| SMYD family member 5                                                            | 1.940442 | 1.091872 | 5.348654 |
| protein phosphatase 1, regulatory (inhibitor) subunit 12A                       | 0.726539 | 0.569742 | 1.252895 |
| protein phosphatase 2, regulatory subunit B, delta isoform                      | 1.498572 | 1.136279 | 0.441577 |
| protein phosphatase 2, regulatory subunit B, delta isoform                      | 0.991738 | 0.799926 | 0.419086 |
| BCL2-associated athanogene 3                                                    | 1.356325 | 0.82374  | 0.519521 |
| ras guanine nucleotide dissociation stimulator-like 1                           | 2.379676 | 0.6099   | 0.900721 |
| DnaJ (Hsp40) homolog, subfamily B, member 9                                     | 1.785508 | 1.114846 | 1.936658 |
| DnaJ (Hsp40) homolog, subfamily B, member 9                                     | 0.985254 | 0.9799   | 0.972411 |
| cysteine-rich hydrophobic domain 1                                              | 1.251337 | 0.781524 | 0.447733 |
| RWD domain containing 1                                                         | 0.619765 | 1.003497 | 0.99935  |
| phosphatidylinositol-specific phospholipase C, X domain containing 1-like       | 0.571102 | 0.643227 | 0.254536 |
| similar to cisplatin resistance-associated overexpressed protein 1              | 2.28722  | 1.875979 | 6.460738 |
| dual-specificity tyrosine-(Y)-phosphorylation regulated kinase 1-like           |          | 0.433448 | 0.568012 |
| tetratricopeptide repeat domain 7B                                              | 1.314964 | 0.658704 | 0.568468 |
|                                                                                 | 0.838585 | 0.713279 | 0.287079 |
|                                                                                 | 2.024492 | 0.799283 | 0.850645 |

|                                                                                    |          |          |          |
|------------------------------------------------------------------------------------|----------|----------|----------|
| La ribonucleoprotein domain family, member 7                                       | 1.054282 | 0.911359 | 0.475721 |
| WD repeat domain 68                                                                | 0.898756 | 0.95762  | 0.45992  |
| SGT1, suppressor of G2 allele of SKP1 ( <i>S. cerevisiae</i> )                     | 0.88319  | 0.950003 | 0.494479 |
| homeodomain interacting protein kinase 1                                           | 2.85598  | 0.701758 | 0.665452 |
| similar to RIKEN cDNA 1810055E12                                                   | 1.036961 | 1.216302 | 0.400359 |
| HEAT repeat containing 3                                                           | 0.873879 | 1.217866 | 2.304869 |
| chromosome 20 open reading frame 108                                               | 1.909959 | 0.586072 | 0.309028 |
| transmembrane protein 128                                                          | 0.981399 | 1.195726 | 0.486462 |
| brain protein 44-like                                                              | 0.783385 | 0.980185 | 0.495002 |
| KIAA1704                                                                           | 1.327019 | 0.85729  | 0.503615 |
| enolase 1, (alpha)                                                                 | 0.332899 | 1.304413 | 0.307972 |
| heterogeneous nuclear ribonucleoprotein K                                          | 85.26582 | 0.508156 | 0.286854 |
| protein tyrosine phosphatase type IVA, member 1                                    | 0.816219 | 0.749261 | 0.479171 |
| LAS1-like ( <i>S. cerevisiae</i> )                                                 |          | 1.836358 | 0.275863 |
| similar to endoplasmic reticulum protein 29 /// endoplasmic r                      | 1.199438 | 1.024238 | 0.27677  |
| tripartite motif-containing 14                                                     | 0.615602 | 0.812282 | 0.584467 |
| immunoresponsive 1 homolog (mouse)                                                 | 3.784739 | 2.68941  | 12.64198 |
| torsin family 1, member A (torsin A)                                               | 0.349126 | 0.953912 | 1.960937 |
| leucine-rich PPR-motif containing                                                  |          |          | 0.468962 |
| complement component 3a receptor 1                                                 | 5.426692 | 1.521684 | 1.722459 |
| tRNA splicing endonuclease 2 homolog ( <i>S. cerevisiae</i> )                      | 0.887207 | 1.069116 | 0.441866 |
| RFT1 homolog ( <i>S. cerevisiae</i> )                                              | 1.327522 | 0.832389 | 0.286627 |
| pallidin homolog (mouse)                                                           | 0.731502 | 1.359857 | 0.411352 |
| abl-interactor 1                                                                   | 2.040894 | 0.565447 | 0.421084 |
| tetratricopeptide repeat domain 7A                                                 | 2.228993 | 3.680379 |          |
| transmembrane protein 41B                                                          | 1.632458 | 1.261893 | 0.913686 |
| spermatid perinuclear RNA binding protein                                          | 1.256716 | 1.027123 | 0.622485 |
| mitogen-activated protein kinase 11                                                | 1.671232 | 1.188616 | 2.397165 |
| R-spondin homolog ( <i>Xenopus laevis</i> )                                        |          |          | 0.462179 |
| ATPase, H <sup>+</sup> /K <sup>+</sup> transporting, nongastric, alpha polypeptide |          | 1.113521 |          |
| mindbomb homolog 2 ( <i>Drosophila</i> )                                           | 1.167882 | 1.000099 | 0.543002 |
| tripartite motif-containing 39                                                     | 2.095248 | 1.791471 | 3.344444 |
| cathepsin A                                                                        | 1.229909 | 1.381704 | 3.354782 |
| NFKB activating protein                                                            | 1.416398 | 0.925255 | 0.576973 |
| mitochondrial ribosomal protein S6                                                 | 0.775153 | 1.216291 | 0.217851 |
| BUD13 homolog ( <i>S. cerevisiae</i> )                                             | 1.039533 | 1.018766 | 2.009652 |
| solute carrier family 30 (zinc transporter), member 6                              | 1.200058 | 0.620164 | 0.196368 |
| acyl-CoA synthetase long-chain family member 5                                     | 0.962963 | 1.126764 | 0.806749 |
| acyl-CoA synthetase long-chain family member 5                                     | 1.04222  | 1.22753  | 0.808701 |
| similar to hypothetical protein FLJ22557                                           | 0.992414 | 0.822913 | 0.386062 |

|                                                               |          |          |          |
|---------------------------------------------------------------|----------|----------|----------|
| zinc finger, matrin type 2                                    | 0.935511 | 1.009282 | 0.606539 |
| tetraspanin 12                                                | 0.899537 | 1.000734 | 0.398689 |
| chromosome 4 open reading frame 20                            | 1.140552 | 0.835578 | 0.361268 |
| 24-dehydrocholesterol reductase                               | 0.538285 | 1.224003 | 0.598632 |
| highly divergent homeobox                                     | 0.92487  | 1.204954 | 0.601218 |
| similar to FLJ20359 protein                                   |          | 0.425045 |          |
| ubinuclein 1                                                  |          | 0.179851 |          |
| ankyrin repeat and SOCS box-containing 3                      | 0.400382 |          |          |
| carbohydrate sulfotransferase 10                              | 1.431013 | 0.777695 | 0.413315 |
| RAS guanyl releasing protein 3 (calcium and DAG-regulated)    | 1.902481 | 1.180881 | 0.422046 |
| itchy homolog E3 ubiquitin protein ligase (mouse)             | 2.329381 | 0.837951 |          |
| basic helix-loop-helix domain containing, class B, 4          | 0.933796 | 8.97005  | 0.368329 |
| 5'-nucleotidase, cytosolic III                                | 1.759786 | 1.048266 | 1.552926 |
| sirtuin (silent mating type information regulation 2 homolog) | 0.608503 | 1.097221 | 1.633973 |
| 5-methyltetrahydrofolate-homocysteine methyltransferase       | 1.535046 | 0.675083 | 0.560132 |
| lanosterol synthase (2,3-oxidosqualene-lanosterol cyclase)    | 0.61747  | 0.854609 | 1.802124 |
| heat shock protein 90kDa alpha (cytosolic), class A member    | 0.602597 | 0.766743 | 0.176347 |
| phosphoinositide-3-kinase, regulatory subunit 5, p101         | 0.991931 | 0.481212 | 1.832772 |
| chromosome 1 open reading frame 59                            | 0.588737 | 1.171248 | 4.711847 |
| zinc finger family member 767                                 | 1.058923 | 2.089888 | 1.248723 |
| stromal cell-derived factor 2-like 1                          | 0.958135 | 1.078258 | 0.355834 |
| TAP binding protein-like                                      | 2.127038 | 1.250799 | 1.123174 |
| glucuronidase, beta                                           | 1.427299 | 1.459139 | 2.506685 |
| glucuronidase, beta                                           | 1.294777 | 1.183297 | 1.691741 |
| sorting nexin 3                                               | 0.677559 | 0.997241 | 0.273721 |
| tetratricopeptide repeat domain 14                            | 0.824974 | 0.844309 | 1.162678 |
| spermatogenesis associated 2                                  | 1.227351 | 0.890374 | 0.669909 |
| tec protein tyrosine kinase                                   | 1.07105  | 0.979653 | 0.475619 |
| nucleosome assembly protein 1-like 4                          | 0.81034  | 0.968197 | 0.47138  |
| purinergic receptor P2Y, G-protein coupled, 8                 | 3.950109 | 1.273292 | 1.765441 |
| Kruppel-like factor 6                                         | 1.019139 | 1.253894 | 2.036585 |
| tumor necrosis factor, alpha-induced protein 8                | 0.812885 | 0.976929 | 1.567377 |
| NUF2, NDC80 kinetochore complex component, homolog (f         | 0.052094 | 0.696026 | 12.86634 |
| heterogeneous nuclear ribonucleoprotein D-like                | 1.364565 | 0.77286  | 0.615216 |
| mitochondrial ribosomal protein L37                           | 0.686953 | 1.067962 | 2.173221 |
| synaptotagmin VI                                              |          | 0.265562 |          |
| similar to zinc finger and BTB domain containing 8; BTB/POZ   | 1.040993 | 0.982816 | 1.793686 |
| kinesin family member 23                                      | 1.179    | 0.934244 | 0.649578 |
| chromosome 22 open reading frame 25                           | 1.020126 | 0.843813 | 0.447825 |
| glycosyltransferase-like domain containing 1                  | 1.491042 | 1.045801 | 1.097491 |

|                                                           |          |          |          |
|-----------------------------------------------------------|----------|----------|----------|
| plastin 3 (T isoform)                                     | 1.537732 | 1.304352 | 2.046322 |
| WD repeat and FYVE domain containing 1                    | 1.425417 | 0.856627 | 0.44091  |
| ubiquitin-conjugating enzyme E2O                          | 0.790007 | 0.498587 | 2.06848  |
| chromosome 10 open reading frame 58                       | 1.625466 | 1.421366 | 4.006158 |
| kelch-like 7 (Drosophila)                                 | 2.948998 | 0.455309 | 4.253596 |
| F-box protein 8                                           | 1.288856 | 0.574739 | 0.298336 |
| E2F transcription factor 5, p130-binding                  | 2.155774 | 0.977178 | 1.143789 |
| complement component (3d/Epstein Barr virus) receptor 2   | 4.21871  | 2.192497 | 2.522847 |
| nucleoporin like 2                                        | 0.675391 | 1.000303 | 0.423516 |
| solute carrier family 39 (zinc transporter), member 13    | 1.36517  | 1.226324 | 1.637768 |
| proteasome (prosome, macropain) 26S subunit, non-ATPase   | 0.686324 | 1.1637   | 1.534264 |
| similar to Heat shock protein 67B2                        | 0.757733 | 1.106329 | 0.407834 |
| tripartite motif-containing 33                            | 1.421835 | 0.9886   | 0.490537 |
| yippee-like 2 (Drosophila)                                | 1.20696  | 0.567183 | 0.421524 |
| small nuclear RNA activating complex, polypeptide 5, 19kD | 0.86775  | 1.093752 | 0.753357 |
| chemokine (C-C motif) receptor 8                          | 1.309259 | 2.351821 | 7.621622 |
| RNA binding motif protein 12B                             | 0.833446 | 0.900786 | 0.522956 |
| transmembrane protein 123                                 | 2.481066 | 1.019203 | 0.235957 |
| FYN binding protein (FYB-120/130)                         | 0.975756 | 0.809817 | 0.166905 |
| STIP1 homology and U-box containing protein 1             | 0.800293 | 0.884833 | 2.043901 |
| protein phosphatase 1, regulatory (inhibitor) subunit 16B | 1.567008 | 0.732789 | 3.575388 |
| myelin expression factor 2                                | 1.968616 | 0.569224 | 0.531498 |
| coiled-coil domain containing 34                          | 2.2128   | 1.629215 | 0.548316 |
| WD repeat domain 36                                       | 0.469837 | 0.872341 | 1.89745  |
| leucine rich repeat containing 28                         | 0.970223 | 0.945369 | 0.328631 |
| ribosomal protein S14                                     | 0.372951 | 1.107036 | 0.395333 |
| proteasome (prosome, macropain) subunit, alpha type, 2    | 0.912099 | 0.898048 |          |
| chromosome 15 open reading frame 23                       | 0.721298 | 1.035131 | 0.927396 |
| far upstream element (FUSE) binding protein 1             | 0.845075 | 0.886196 | 0.483102 |
| RM11, RecQ mediated genome instability 1, homolog (S. cer | 0.59039  | 0.929589 | 0.796976 |
| chromosome 13 open reading frame 1                        | 1.012401 | 0.816833 | 0.398217 |
| GrpE-like 1, mitochondrial (E. coli)                      | 0.86243  | 1.104174 | 0.487527 |
| RAB33B, member RAS oncogene family                        | 0.967621 | 0.881816 | 0.392489 |
| tumor necrosis factor (ligand) superfamily, member 13b    | 5.573077 | 2.130432 | 5.529872 |
| catenin, beta like 1                                      | 0.814521 | 0.943001 | 2.306259 |
| Hypothetical LOC424678                                    | 0.417268 | 0.892891 | 0.736946 |
| similar to DNA polymerase-transactivated protein 6        | 1.606364 | 1.20119  | 0.607887 |
| fucosyltransferase 8 (alpha (1,6) fucosyltransferase)     | 1.168116 | 0.866468 | 0.735243 |
| crystallin, zeta (quinone reductase)                      | 1.06653  | 0.935098 | 2.09775  |
| sorting nexin 5                                           | 1.036151 | 1.422454 | 0.726841 |

|                                                                        |          |          |          |
|------------------------------------------------------------------------|----------|----------|----------|
| clathrin, light chain (Lca)                                            | 0.372132 | 1.079296 | 1.122413 |
| prune homolog (Drosophila)                                             | 0.48314  | 0.534194 |          |
| methylthioadenosine phosphorylase                                      | 0.627611 | 1.158884 | 3.610689 |
| flotillin 2                                                            | 1.331838 | 0.604316 | 3.236728 |
| chromosome 6 open reading frame 130                                    | 1.270501 | 0.907478 | 0.493076 |
| poly(A) polymerase alpha                                               | 1.328865 | 0.729218 | 0.327089 |
| immunoglobulin mu binding protein 2                                    | 1.274991 | 1.294415 | 1.371328 |
| Src-like-adaptor                                                       | 0.951705 | 0.674017 | 0.163664 |
| F-box protein 32                                                       | 0.357631 | 1.16862  | 0.783107 |
| vanin 1                                                                | 0.68454  | 1.346787 | 1.895379 |
| nuclear factor of kappa light polypeptide gene enhancer in B           | 2.156216 | 0.881063 | 2.404678 |
| 3-oxoacid CoA transferase 1                                            | 0.366413 | 1.054033 | 0.790248 |
| myotrophin                                                             | 0.906148 | 0.810141 | 0.434791 |
| mitogen-activated protein kinase kinase 5                              | 0.942651 | 1.093943 | 2.522275 |
| ATPase, H <sup>+</sup> transporting, lysosomal 38kDa, V0 subunit D2    | 1.519167 | 2.447396 | 8.959435 |
| kelch domain containing 10                                             |          |          | 0.975331 |
| glucocorticoid induced transcript 1                                    | 2.374527 | 1.77354  | 3.822957 |
| solute carrier family 16, member 1 (monocarboxylic acid tra            | 0.854753 | 1.013193 | 2.300337 |
| syntaxin binding protein 3                                             | 0.341914 |          |          |
| SUMO/sentrin specific peptidase family member 8                        | 1.779545 | 0.882956 | 0.420446 |
| protein kinase C, delta                                                | 1.157437 | 0.653106 | 0.43486  |
| zinc finger CCCH-type containing 12A                                   | 1.460885 | 0.24337  | 0.642954 |
| 6-phosphofructo-2-kinase/fructose-2,6-biphosphatase 4                  |          | 0.925128 | 0.15668  |
| similar to Hypothetical protein SB153, isoform 1                       | 2.351444 | 0.691003 | 0.668854 |
| RNA binding protein, autoantigenic (hnRNP-associated with lethal yellc |          | 15.73246 | 0.303435 |
| asparagine-linked glycosylation 1, beta-1,4-mannosyltransferase homok  |          | 0.487516 | 0.313075 |
| adenosine monophosphate deaminase 1 (isoform M)                        | 1.103058 | 2.404491 |          |
| dedicator of cytokinesis 2                                             | 1.01049  | 0.911036 | 0.444084 |
| hypothetical LOC415325                                                 | 2.203358 | 3.176225 | 5.582749 |
| forkhead box I1                                                        | 1.515471 | 1.81299  | 3.275486 |
| chloride channel CLIC-like 1                                           | 0.895233 | 0.329376 |          |
| envoplakin                                                             |          | 1.556648 |          |
| poly (ADP-ribose) glycohydrolase                                       | 0.946484 | 1.061632 | 0.439782 |
| chromosome 16 open reading frame 62                                    | 0.373241 | 1.09667  | 0.214668 |
| WD repeat domain 47                                                    | 2.111318 | 0.784335 | 0.784971 |
| KIAA0692                                                               | 2.963765 | 0.84135  | 0.914007 |
| calmodulin regulated spectrin-associated protein 1-like 1              |          | 0.935037 | 0.303567 |
| gamma-aminobutyric acid (GABA) A receptor, pi                          | 0.945104 | 0.954364 | 3.347601 |
| similar to KIAA1032 protein                                            | 1.917577 | 0.468111 | 0.391275 |
| similar to egg-specific protein                                        | 2.565518 | 0.856517 | 2.463409 |

|                                                                    |          |          |          |
|--------------------------------------------------------------------|----------|----------|----------|
| tumor suppressor candidate 4                                       |          | 0.805734 | 0.227075 |
| hypothetical LOC415671                                             |          | 0.101683 |          |
| galactose-1-phosphate uridylyltransferase                          | 0.713925 | 0.445804 | 1.772905 |
| formin homology 2 domain containing 1                              | 1.330981 | 0.80026  | 4.019383 |
| formin homology 2 domain containing 1                              | 1.819659 |          | 3.475478 |
| CD6 molecule                                                       | 0.824579 |          | 1.102713 |
| CD6 molecule                                                       | 0.392746 | 0.498723 |          |
| ring finger and FYVE-like domain containing 1                      | 1.312237 | 1.422735 | 0.793337 |
| ubিনuclein 1                                                       |          | 0.475094 | 1.018731 |
| Dmx-like 1                                                         |          | 5.047422 | 0.63381  |
| unc-13 homolog D (C. elegans)                                      | 1.093643 | 0.777886 | 1.980235 |
| hypothetical LOC415913                                             | 0.497859 | 1.181657 | 0.212095 |
| UDP-N-acetyl-alpha-D-galactosamine:polypeptide N-acetyltransferase | 1.379886 | 1.41377  | 1.275585 |
| CUB and zona pellucida-like domains 1                              | 0.634619 | 8.516839 | 0.420342 |
| eukaryotic translation initiation factor 2C, 1                     |          | 0.304931 |          |
| oxoglutarate dehydrogenase-like                                    | 0.626804 | 0.551738 | 1.287261 |
| oxoglutarate dehydrogenase-like                                    | 0.596528 | 1.082072 | 2.191678 |
| unkempt homolog (Drosophila)                                       | 0.833689 | 0.539002 | 0.848266 |
| casein kinase 1, gamma 1                                           | 0.819067 | 0.946596 | 0.218861 |
| casein kinase 1, gamma 1 /// similar to KIAA0101                   | 0.46055  | 1.059876 | 0.404773 |
| solute carrier family 25, member 46                                | 1.232918 | 0.647541 | 0.354804 |
| COMM domain containing 10                                          | 0.541884 | 2.141534 | 0.690163 |
| similar to laeverin                                                | 1.643036 | 1.393717 | 0.397752 |
| neuregulin 3                                                       |          | 1.064876 |          |
| dynein, axonemal, heavy chain 3                                    | 0.648722 | 1.009497 | 2.284607 |
| coagulation factor XIII, B polypeptide                             | 0.529265 |          | 2.030609 |
| coagulation factor XIII, B polypeptide                             | 0.281447 |          |          |
| KIAA0258                                                           | 6.293525 |          | 1.32507  |
| EGF-like-domain, multiple 7                                        |          |          | 2.921704 |
| similar to KIAA1328 protein                                        |          | 1.048059 |          |
| complement factor H                                                | 0.897759 | 0.897088 | 0.067372 |
| complement factor H                                                |          |          | 0.014543 |
| WD repeat domain 24                                                | 0.857307 | 1.134861 | 2.776845 |
| aquaporin 7                                                        |          |          |          |
| aquaporin 7                                                        | 0.43227  | 0.987834 |          |
| dual oxidase maturation factor 1                                   | 2.152313 | 1.503761 | 0.845181 |
| Vac14 homolog (S. cerevisiae)                                      |          | 0.97208  | 1.558578 |
| WD repeat domain 75                                                | 0.991937 | 0.866688 | 0.933488 |
| ubiquinol-cytochrome c reductase core protein II                   | 1.073894 | 1.459326 | 0.357768 |
| zinc finger, MYM-type 4                                            |          | 0.07501  |          |

|                                                                   |          |          |          |
|-------------------------------------------------------------------|----------|----------|----------|
| regulator of G-protein signalling 13                              | 1.1041   | 1.109351 | 0.492289 |
| olfactory receptor, family 10, subfamily A, member 4              |          | 0.713825 | 2.086079 |
| hypothetical protein LOC770019                                    |          | 2.35396  |          |
| hypothetical LOC427084                                            | 1.385846 | 1.032996 | 0.485164 |
| CUB and Sushi multiple domains 2                                  | 0.354929 |          |          |
| geranylgeranyl diphosphate synthase 1                             | 1.110323 | 1.050163 | 0.470075 |
| adenylate cyclase 10 (soluble) /// hypothetical protein LOC7      | 1.819968 | 0.427671 |          |
| adenylate cyclase 10 (soluble)                                    |          | 0.345598 |          |
| retinoid X receptor, alpha                                        |          | 0.43671  |          |
| nicotinamide nucleotide adenylyltransferase 1                     |          | 8.944266 | 1.445121 |
| KIAA1946                                                          | 0.510879 | 1.398858 | 0.35606  |
| prenylcysteine oxidase 1 like                                     | 2.187726 | 1.898124 | 3.823356 |
| dymeclin                                                          | 0.653407 | 2.017987 | 1.277821 |
| dymeclin                                                          | 0.375742 |          | 1.665156 |
| t-complex 11 homolog (mouse)                                      | 0.737171 | 0.627861 |          |
| t-complex 11 homolog (mouse)                                      | 0.851736 | 2.394296 |          |
| solute carrier family 15, member 4                                | 0.816303 | 1.237889 | 0.509687 |
| similar to retinoblastoma-binding protein 1-related protein       | 2.020257 | 0.890768 | 0.782661 |
| UDP-N-acetylglucosamine pyrophosphorylase 1                       | 1.78491  | 0.791772 | 2.108193 |
| exportin 6                                                        | 6.59355  |          |          |
| coiled-coil domain containing 57                                  |          |          |          |
| protocadherin 15                                                  | 3.683202 |          |          |
| protocadherin 15                                                  | 0.452645 |          |          |
| pecanex homolog (Drosophila)                                      | 1.128827 | 0.934785 | 0.7396   |
| protocadherin 15                                                  | 0.387185 | 0.922114 | 0.673312 |
| transcription factor Dp-2 (E2F dimerization partner 2)            | 0.866795 | 0.910774 | 0.333078 |
| transcription factor Dp-2 (E2F dimerization partner 2)            | 0.70013  | 0.81461  | 0.329008 |
| protocadherin 15                                                  |          |          | 18.75425 |
| chromosome 2 open reading frame 21                                | 1.333615 | 0.509435 | 0.414868 |
| G protein-coupled receptor kinase 7                               | 0.675845 | 2.215482 | 0.76297  |
| protein kinase C and casein kinase substrate in neurons 1         | 0.33712  |          |          |
| similar to Acylamino-acid-releasing enzyme (AARE) (Acyl-          | 0.488405 | 0.790513 |          |
| zinc finger and BTB domain containing 38                          | 3.810678 | 0.940858 | 1.312543 |
| ectonucleotide pyrophosphatase/phosphodiesterase 1                |          | 3.867216 | 1.434892 |
| acetoacetyl-CoA synthetase                                        | 0.552201 | 1.613555 | 0.343275 |
| amine oxidase, copper containing 3 (vascular adhesion prote       | 0.342202 |          |          |
| macrophage stimulating 1 receptor (c-met-related tyrosine kinase) |          |          |          |
| ADAMTS-like 2                                                     |          | 2.537758 |          |
| WD repeat domain 69                                               | 11.64969 |          | 1.553516 |
| hypothetical LOC420114                                            |          |          | 0.279659 |



|                                                                        |          |          |          |
|------------------------------------------------------------------------|----------|----------|----------|
| Rho-related BTB domain containing 1                                    | 0.895442 | 2.177696 | 0.785742 |
| exosome component 10                                                   | 0.890187 | 1.03087  | 0.953665 |
| core-binding factor, runt domain, alpha subunit 2; translocat          | 0.834009 | 1.234192 | 0.407074 |
| ankyrin-repeat and fibronectin type III domain containing 1            |          |          | 7.611201 |
| regulator of G-protein signalling 14                                   | 1.305792 | 0.979383 | 1.056125 |
| ankyrin 3                                                              | 3.169329 | 1.248818 | 0.52756  |
| solute carrier family 9 (sodium/hydrogen exchanger), member 2          |          | 14.0154  |          |
| zinc finger CCCH-type containing 7A                                    | 1.279375 | 0.887165 | 0.858931 |
| phosphatidylinositol glycan anchor biosynthesis, class V               | 0.808081 | 0.850662 | 2.087602 |
| LAG1 homolog, ceramide synthase 1                                      |          | 1.135599 | 0.340627 |
| hypothetical protein LOC768480 /// solute carrier family 16,           | 1.680332 | 1.16055  | 0.404954 |
| homeobox A6                                                            | 1.208462 | 0.51732  | 0.27103  |
| SRY (sex determining region Y)-box 5                                   | 1.096621 |          | 117.9329 |
| axin 1                                                                 | 0.669777 | 0.888175 | 0.989386 |
| heat shock protein 25                                                  | 2.516575 | 1.092583 | 0.456345 |
| carnitine palmitoyltransferase 1A (liver)                              | 1.303206 | 1.15344  | 2.247803 |
| growth differentiation factor 9                                        | 0.457046 | 1.001028 | 0.329081 |
| periostin, osteoblast specific factor                                  | 1.285458 | 1.083249 | 0.926536 |
| transient receptor potential cation channel, subfamily C, member 1     |          | 1.438361 | 0.42225  |
| protein kinase C, beta                                                 |          | 0.897192 | 1.189878 |
| protein kinase C, alpha                                                | 0.97671  | 1.228595 | 0.081328 |
| signal transducer and activator of transcription 3 (acute-phas         | 1.514709 | 1.191119 | 1.558734 |
| distal-less homeobox 6                                                 | 2.340132 |          |          |
| orthodenticle homeobox 2                                               |          |          |          |
| protocadherin gamma subfamily A, 2                                     | 1.64362  | 1.160386 | 2.692418 |
| Copine VIII                                                            | 1.987325 | 1.330001 | 1.941036 |
| Down syndrome critical region gene 3                                   | 1.134544 | 0.946452 | 0.489041 |
| chromosome 16 open reading frame 70                                    |          | 1.212458 | 0.724542 |
| leucine rich repeat containing 28                                      | 0.742906 | 1.061646 | 0.260352 |
| similar to nucleophosmin/nucleoplasmin, 2                              |          | 0.790678 | 0.600655 |
| procollagen-proline, 2-oxoglutarate 4-dioxygenase (proline 4-hydroxyla |          | 0.796303 | 0.322619 |
| dynein, cytoplasmic 2, light intermediate chain 1                      | 0.441424 | 2.312286 | 0.734357 |
| MAP-kinase activating death domain                                     |          | 0.278656 |          |
| dynammin binding protein                                               | 5.377087 | 1.971727 |          |
| RCD1 required for cell differentiation1 homolog (S. pombe)             | 0.451522 | 1.651079 | 0.485705 |
| PAP associated domain containing 1                                     | 1.491748 | 0.891109 | 0.545221 |
| Zinc and ring finger 2                                                 | 0.961254 | 0.787865 | 0.392231 |
| Hypothetical LOC418900                                                 | 0.72114  | 1.133073 | 0.192198 |
| Hypothetical LOC422903                                                 | 1.019937 | 1.342205 | 2.23829  |
| 5-hydroxytryptamine (serotonin) receptor 2C                            |          | 9.169883 |          |

|                                                                         |          |          |          |
|-------------------------------------------------------------------------|----------|----------|----------|
| NHL repeat containing 2                                                 | 0.976675 | 1.251183 | 0.445859 |
| Excision repair cross-complementing rodent repair deficiency            | 0.981136 | 0.829522 | 0.256293 |
| myc target 1                                                            |          | 1.561901 | 1.363128 |
| phosphoribosyl pyrophosphate synthetase-associated protein              | 0.941366 | 0.742526 | 1.2892   |
| RNA binding motif protein 33                                            | 1.130226 | 1.102706 | 0.880572 |
| FCH and double SH3 domains 2                                            | 0.843828 | 0.937646 | 0.428371 |
| RAB4A, member RAS oncogene family                                       | 0.757719 | 1.005132 | 1.246964 |
| Antagonist of mitotic exit network 1 homolog (S. cerevisiae)            | 2.093466 | 1.072278 | 1.173623 |
| poly (ADP-ribose) polymerase family, member 4                           |          |          |          |
| RNA binding motif protein 33                                            | 0.879913 | 1.018645 | 0.809191 |
| activated leukocyte cell adhesion molecule                              | 0.998854 | 0.879338 | 0.328497 |
| LOC417551                                                               | 1.097959 | 0.452254 | 1.685596 |
| hypothetical gene supported by CR390948                                 |          | 0.615856 | 2.519035 |
| N-acetylated alpha-linked acidic dipeptidase 2                          |          |          |          |
| NUAK family, SNF1-like kinase, 1                                        | 1.43459  | 1.391298 | 2.191658 |
| hypoxia-inducible factor 1, alpha subunit (basic helix-loop-h           | 1.218679 | 1.030283 | 1.722237 |
| Ribosomal protein S6 kinase, 52kDa, polypeptide 1                       | 0.487415 | 0.812238 | 0.922274 |
| Collagen, type IV, alpha 5 (Alport syndrome)                            | 1.013721 | 0.820114 | 6.345138 |
| hypothetical gene supported by CR353498                                 | 1.685264 | 0.76711  | 1.875608 |
| zinc finger and BTB domain containing 25                                | 0.669073 | 0.826435 | 0.469053 |
| KIAA0802                                                                | 2.764797 | 1.031569 | 2.864227 |
| PDZ and LIM domain 5                                                    | 2.585628 | 1.090669 | 1.079122 |
| Immunoglobulin superfamily, member 10                                   | 1.98554  | 1.036437 | 2.72823  |
| RAB11 family interacting protein 4 (class II)                           | 0.059083 |          |          |
| chromosome 6 open reading frame 130                                     |          |          | 0.211145 |
| 1-acylglycerol-3-phosphate O-acyltransferase 6 (lysophosphatidic acid ε |          | 0.18169  | 1.041127 |
| collagen, type XVI, alpha 1                                             | 2.023953 | 0.959968 | 4.071076 |
| protein tyrosine phosphatase, receptor type, S                          | 1.33384  | 0.534338 | 3.381881 |
| General transcription factor IIIC, polypeptide 2, beta 110kDa           | 0.572602 | 0.807027 | 1.636049 |
| Similar to RIKEN cDNA 8030446C20                                        | 19.26087 | 1.057359 | 0.873056 |
| Hypothetical protein LOC768386                                          |          | 1.629327 | 0.037017 |
| FtsJ homolog 3 (E. coli)                                                |          | 0.94282  | 1.334631 |
| Wolf-Hirschhorn syndrome candidate 1                                    | 0.40124  | 1.469457 | 3.420993 |
| pyruvate dehydrogenase phosphatase isoenzyme 2                          | 0.774595 | 0.904807 | 0.265585 |
| NEDD4 binding protein 2-like 1                                          | 0.480203 | 0.885739 | 2.821896 |
| RAD54-like 2 (S. cerevisiae)                                            | 9.2002   | 0.675047 | 1.072787 |
| RAB27A, member RAS oncogene family                                      | 0.981513 | 0.931589 | 0.259664 |
| membrane bound O-acyltransferase domain containing 2                    | 0.877836 | 1.229051 | 0.962779 |
| tetratricopeptide repeat domain 13                                      | 3.915017 | 0.858969 | 0.313527 |
| chromosome 9 open reading frame 41                                      | 0.55264  | 0.948098 | 0.611194 |

|                                                                 |          |          |                      |
|-----------------------------------------------------------------|----------|----------|----------------------|
| membrane protein, palmitoylated 3 (MAGUK p55 subfamily KIAA0430 | 2.437604 | 0.681195 | 0.598868<br>0.026831 |
| LOC420939                                                       | 1.607527 | 1.497546 | 2.484914             |
| Solute carrier family 30 (zinc transporter), member 1           | 1.467951 | 1.562153 | 2.474627             |
| Hypothetical LOC423879                                          | 1.058225 | 0.96464  | 0.242216             |
| exophilin 5                                                     | 1.347009 | 2.259832 | 2.754441             |
| zinc finger CCCH-type containing 6                              | 2.126642 | 0.644967 | 0.599669             |
| chromosome 12 open reading frame 10                             | 0.532848 | 0.934754 | 2.884425             |
| chromosome 12 open reading frame 10                             | 0.646312 | 0.759544 | 2.859256             |
| chromosome 14 open reading frame 43                             | 1.519166 | 0.59892  | 2.164389             |
| Hypothetical LOC417130                                          | 0.489764 | 0.814428 | 1.428166             |
| Host cell factor C2                                             | 1.276877 | 0.605038 | 0.33822              |
| protein S (alpha)                                               | 1.563748 | 1.371124 | 1.315197             |
| replication factor C (activator 1) 1, 145kDa                    | 0.948909 | 0.827479 | 2.336322             |
| ATP binding domain 4                                            | 0.848519 | 1.096746 | 2.046452             |
| Microtubule-associated protein 7                                | 1.270468 |          | 2.621625             |
| similar to RIKEN cDNA 2810451A06 gene                           | 0.079315 |          | 1.248189             |
| Chromodomain helicase DNA binding protein 1                     | 56.38715 | 1.112245 | 0.207518             |
| yippee-like 2 (Drosophila)                                      | 1.539645 | 0.57341  | 0.357503             |
| WD repeat and FYVE domain containing 3                          |          |          | 41.70946             |
| microtubule-associated protein 7                                | 1.009216 | 1.022284 | 1.084252             |
| nucleolar protein 5A (56kDa with KKE/D repeat)                  | 0.951492 | 0.989234 | 1.579202             |
| zinc finger CCCH-type, antiviral 1                              | 3.774448 | 1.5602   | 0.870237             |
| transforming, acidic coiled-coil containing protein 2           | 19.90378 | 0.511254 |                      |
| ATPase family, AAA domain containing 5                          | 0.745701 | 1.235869 | 0.286409             |
| similar to hypothetical protein FLJ38973                        | 0.843435 | 0.844    | 0.345185             |
| LSM8 homolog, U6 small nuclear RNA associated (S. cerev         | 2.873586 | 1.018684 | 0.343538             |
| T-cell immunoglobulin and mucin domain containing 4             | 0.500555 | 2.415244 | 1.69128              |
| hematological and neurological expressed 1                      | 0.961122 | 1.058422 | 0.913496             |
| Olfactomedin-like 2B                                            | 1.226582 | 0.945645 | 2.4739               |
| Family with sequence similarity 107, member B                   | 1.502271 | 1.203251 | 0.455283             |
| nuclear prelamin A recognition factor                           | 1.055565 | 0.926338 | 1.015924             |
| ZFAT zinc finger 1                                              | 1.342628 | 1.346862 | 0.514342             |
| phosphofurin acidic cluster sorting protein 2                   | 1.409669 | 0.79412  | 1.365153             |
| membrane-bound transcription factor peptidase, site 1           | 0.614321 | 1.231678 | 0.834639             |
| Sodium channel, voltage-gated, type II, alpha subunit           | 7.042868 | 1.005598 |                      |
| Similar to SSFA2 protein                                        | 1.341557 | 1.170413 | 0.427947             |
| coiled-coil domain containing 52                                | 0.76712  | 0.84122  | 0.534465             |
| spleen focus forming virus (SFFV) proviral integration onco     | 3.417788 | 1.618024 | 1.879086             |
| ORM1-like 1 (S. cerevisiae)                                     | 0.731691 | 0.860467 | 0.485073             |

|                                                               |          |          |          |
|---------------------------------------------------------------|----------|----------|----------|
| doublecortex                                                  |          | 8.253369 |          |
| mitofusin 1                                                   |          |          | 0.659112 |
| BTB (POZ) domain containing 1                                 | 0.931766 | 0.985907 | 0.458502 |
| mitochondrial ribosome recycling factor                       | 1.337491 | 0.767866 | 2.205522 |
| myosin phosphatase Rho interacting protein                    | 1.551458 | 0.77497  | 2.851405 |
| similar to Myotubularin related protein 9                     | 1.060607 | 0.838319 | 2.122418 |
| Inhibitor of kappa light polypeptide gene enhancer in B-cells | 0.409959 | 0.88902  | 1.211987 |
| Triple functional domain (PTPRF interacting)                  | 2.145023 | 1.118903 | 5.258018 |
| Similar to trypsinogen                                        | 1.127867 | 0.301657 | 0.253473 |
| centaurin, alpha 2                                            | 1.251512 | 1.417119 | 2.470093 |
| zinc finger protein 706                                       | 1.066397 | 1.004257 | 0.455719 |
| Similar to Poly [ADP-ribose] polymerase 14 (PARP-14) (B       | 4.165403 | 1.383867 | 2.075972 |
| mitochondrial translation optimization 1 homolog (S. cerevis  | 0.44323  | 1.467963 | 0.559027 |
| SET domain containing (lysine methyltransferase) 8            | 0.626213 | 1.493465 | 0.451311 |
| transmembrane protein 119                                     |          | 0.364667 |          |
| tensin 1                                                      | 1.595666 | 2.273633 |          |
| actin-like 6A                                                 | 0.448183 | 2.921839 | 0.405595 |
| Ch-runtB2                                                     | 0.814502 | 0.879087 | 0.307598 |
| Solute carrier family 45, member 4                            | 0.458769 | 1.251358 | 0.860609 |
| kelch-like 26 (Drosophila)                                    |          | 12.01196 |          |
| Zinc finger, RAN-binding domain containing 2                  | 1.393874 | 0.95945  | 0.51714  |
| WWC family member 3                                           | 1.660769 | 1.473075 | 2.386892 |
| Ribosomal protein, large, P1                                  | 12.49346 |          |          |
| Ribosomal protein, large, P1                                  | 1.529404 | 0.405305 | 0.939354 |
| chromosome 9 open reading frame 96                            | 1.991931 | 0.874591 | 2.177922 |
| HECT, C2 and WW domain containing E3 ubiquitin protein        | 0.818352 | 0.52462  | 0.120015 |
| FK506 binding protein 12-rapamycin associated protein 1       |          |          | 0.394091 |
| F-box and leucine-rich repeat protein 20                      | 1.126569 | 0.737646 | 0.53098  |
| Myotubularin related protein 7                                | 1.702621 | 1.082425 | 6.82641  |
| N-acylaminoacyl-peptide hydrolase                             | 1.030522 | 0.714788 | 2.388217 |
| ATP-binding cassette, sub-family B (MDR/TAP), member 1        | 0.704364 | 1.368298 | 4.982566 |
| CDC5 cell division cycle 5-like (S. pombe)                    | 0.642089 | 0.793458 | 2.31445  |
| activating transcription factor 7 interacting protein         | 0.643509 | 0.857325 | 2.380037 |
| SRY (sex determining region Y)-box 7                          | 2.892748 | 1.342849 | 3.490411 |
| NOP16 nucleolar protein homolog (yeast)                       | 0.834611 | 1.393462 | 1.122727 |
| hypothetical LOC423478                                        | 2.018656 |          |          |
| protein phosphatase 1, regulatory (inhibitor) subunit 12B     |          | 1.268635 |          |
| protein phosphatase 1, regulatory (inhibitor) subunit 12B     | 1.017841 | 1.005056 | 2.995721 |
| Thioredoxin domain containing 10                              | 1.212257 | 0.95238  | 0.549276 |
| Similar to KIAA0612 protein                                   | 1.606743 | 0.666239 | 1.809951 |

|                                                                             |          |          |          |
|-----------------------------------------------------------------------------|----------|----------|----------|
| Solute carrier family 29 (nucleoside transporters), member 3                | 1.481216 | 1.114312 | 0.069469 |
| Zinc binding alcohol dehydrogenase, domain containing 2                     | 0.861609 | 0.767418 | 0.449589 |
| Zinc finger protein 511                                                     |          | 0.844689 |          |
| PDS5, regulator of cohesion maintenance, homolog B ( <i>S. cerevisiae</i> ) |          | 0.037283 |          |
| diacylglycerol kinase, delta 130kDa                                         | 0.922939 | 1.487195 | 1.729346 |
| NEDD4 binding protein 2                                                     | 0.717721 | 0.898687 | 0.470411 |
| NEDD4 binding protein 2                                                     | 0.687844 | 1.030744 | 0.622899 |
| Similar to KIAA1370 protein                                                 | 0.808093 | 0.751984 | 1.296305 |
| Similar to RanBP7/importin 7                                                | 0.999413 | 0.96818  | 0.941636 |
| Tetratricopeptide repeat domain 39A                                         | 0.989994 | 1.889526 | 0.351774 |
| microtubule-actin crosslinking factor 1                                     |          | 0.995571 |          |
| fibroblast growth factor receptor 2                                         | 0.927428 |          |          |
| Glutamate receptor, ionotropic, AMPA 3                                      | 0.259989 | 1.088304 |          |
| Brain protein 44-like                                                       | 1.21321  |          |          |
| PAS domain containing serine/threonine kinase                               | 0.543593 | 1.042902 | 0.283294 |
| PAS domain containing serine/threonine kinase                               | 0.880742 | 1.257876 | 0.671277 |
| adenosine deaminase, tRNA-specific 1                                        | 1.438243 | 0.659091 | 0.926918 |
| G protein-coupled receptor kinase 6                                         | 0.563372 | 0.802331 | 1.297305 |
| POM121 membrane glycoprotein (rat)                                          | 0.813528 | 1.181384 | 2.424227 |
| RELT-like 1                                                                 | 0.358273 | 0.907397 | 1.480123 |
| caldesmon 1                                                                 | 1.659272 | 2.189153 | 5.282702 |
| WD repeat domain 76                                                         | 0.865213 | 1.130048 | 2.358092 |
| bromodomain adjacent to zinc finger domain, 1B                              | 1.839095 | 0.897007 | 0.677245 |
| family with sequence similarity 44, member B                                | 0.754402 | 1.230554 | 1.800887 |
| B-cell CLL/lymphoma 9                                                       | 1.460107 | 1.143977 | 2.73332  |
| transducer of ERBB2, 2                                                      | 1.161463 | 0.591445 | 0.28073  |
| Dapper, antagonist of beta-catenin, homolog 2 ( <i>Xenopus laevis</i> )     | 3.072675 | 1.877368 | 2.21419  |
| Dapper, antagonist of beta-catenin, homolog 2 ( <i>Xenopus laevis</i> )     | 2.108629 | 1.850548 | 1.371065 |
| TSR1, 20S rRNA accumulation, homolog ( <i>S. cerevisiae</i> )               |          | 0.653139 | 0.391988 |
| development and differentiation enhancing factor 1                          | 1.277924 | 0.664643 | 0.445509 |
| hect (homologous to the E6-AP (UBE3A) carboxyl terminus                     | 1.228392 | 0.876477 | 0.602014 |
| porcupine                                                                   | 0.931372 | 1.382284 | 1.550229 |
| porcupine                                                                   | 0.974355 | 1.554689 | 2.127761 |
| BCL6 co-repressor                                                           | 1.132971 | 0.971506 | 0.387346 |
| Similar to Tcf-3 co-repressor CtBP                                          | 0.884656 | 1.166094 | 0.659831 |
| Calcineurin binding protein 1                                               | 1.328841 | 0.895795 | 0.596744 |
| nucleoporin 35kDa                                                           | 0.698694 | 1.082901 | 0.624435 |
| TBC1 domain family, member 23                                               | 1.692474 | 0.996082 | 0.413132 |
| ADAM metallopeptidase domain 9 (meltrin gamma)                              | 1.465924 | 1.154191 | 0.661401 |
| aldolase B, fructose-bisphosphate                                           | 1.010749 | 1.423848 | 4.437392 |

|                                                                                    |          |          |          |
|------------------------------------------------------------------------------------|----------|----------|----------|
| oxidative stress induced growth inhibitor 1                                        | 1.320023 | 0.98094  | 2.34087  |
| microtubule-associated protein 1A                                                  | 0.784602 | 0.812755 | 0.521422 |
| similar to long microtubule-associated protein 1A; long MAI                        | 1.246917 | 0.534739 | 0.403238 |
| cathepsin B                                                                        | 2.19162  | 1.441065 | 2.885587 |
| CDK2-associated protein 1                                                          | 0.677991 | 0.827376 | 0.293397 |
| FYVE, RhoGEF and PH domain containing 3                                            | 0.82409  | 0.972817 | 0.747504 |
| unc-93 homolog B1 (C. elegans)                                                     |          |          | 0.052765 |
| tubulin tyrosine ligase-like family, member 12                                     | 0.433491 | 1.899772 | 0.108589 |
| tubulin tyrosine ligase-like family, member 12                                     | 0.503657 | 1.319459 | 0.361315 |
| BTG family, member 2                                                               | 0.91301  | 0.626426 | 0.413663 |
| Similar to MCTP2                                                                   | 1.205581 | 1.836495 | 3.06681  |
| Zinc finger protein 592                                                            | 2.94933  | 0.798791 | 1.250723 |
| Ribokinase                                                                         | 0.951275 | 0.474736 | 0.641483 |
| WD repeat domain 73                                                                | 0.852485 | 0.888456 | 0.805256 |
| Acidic (leucine-rich) nuclear phosphoprotein 32 family, men                        | 0.667915 | 1.274619 | 0.245703 |
| vacuolar protein sorting 4 homolog B (S. cerevisiae)                               | 0.54172  | 1.172786 | 0.711962 |
| fukutin related protein                                                            | 1.441151 | 0.682303 | 1.025016 |
| M-phase phosphoprotein 9                                                           |          | 2.659385 | 0.670252 |
| Membrane-associated ring finger (C3HC4) 11                                         |          |          |          |
| SWI/SNF related, matrix associated, actin dependent regulator of chromatin, subfar |          |          | 0.174404 |
| Galactose-3-O-sulfotransferase 1                                                   | 0.979271 | 0.997461 | 0.175872 |
| PH domain and leucine rich repeat protein phosphatase                              | 0.342741 | 0.943118 | 1.301907 |
| WD repeat domain 31                                                                |          |          | 2.269904 |
| Guanylate cyclase 1, soluble, alpha 2                                              | 2.107626 | 1.191096 | 1.897264 |
| chromosome 9 open reading frame 58                                                 | 1.220128 | 1.225866 | 1.017849 |
| transient receptor potential cation channel, subfamily M, mei                      | 1.299737 | 1.153998 |          |
| B-cell CLL/lymphoma 11A (zinc finger protein)                                      | 2.87882  | 0.651114 | 0.606216 |
| Amyloid beta (A4) precursor protein-binding, family A, member 1 (X11)              |          |          |          |
| Phospholipase A2, group X                                                          | 0.405037 | 1.42251  | 0.797133 |
| Ankyrin repeat domain 13C                                                          | 0.795152 | 0.995245 | 0.319101 |
| copine IV                                                                          | 2.686111 | 0.735694 | 4.353081 |
| hypothetical protein LOC772356                                                     | 2.594922 | 1.304412 | 2.596886 |
| Discoidin, CUB and LCCL domain containing 1                                        | 0.467579 | 0.689146 | 0.200245 |
| Discoidin, CUB and LCCL domain containing 1                                        | 0.527865 | 0.7061   | 0.209325 |
| Hypothetical protein LOC771033                                                     | 4.997049 | 0.513238 | 1.811264 |
| Hypothetical protein LOC771033                                                     | 29.67889 |          |          |
| Rho GTPase activating protein 5                                                    | 1.091204 | 0.979759 | 0.308294 |
| KIAA1797                                                                           | 0.322644 | 0.906256 | 2.108681 |
| coronin, actin binding protein, 2A                                                 | 1.795962 | 1.125107 | 1.639826 |
| LOC421235                                                                          |          | 0.445643 |          |

|                                                                                   |          |          |          |
|-----------------------------------------------------------------------------------|----------|----------|----------|
| Non imprinted in Prader-Willi/Angelman syndrome 1                                 | 1.82473  | 0.424755 | 0.652885 |
| non imprinted in Prader-Willi/Angelman syndrome 1                                 | 2.095974 | 0.97538  | 0.431008 |
| carbonic anhydrase IV                                                             | 0.79855  |          | 2.975108 |
| yippee-like 1 (Drosophila)                                                        | 0.725376 | 0.7906   | 0.228322 |
| SAM domain and HD domain 1                                                        | 2.758332 | 1.508576 | 3.293049 |
| WD repeat domain 34                                                               | 1.040874 |          | 3.748781 |
| abhydrolase domain containing 12                                                  |          | 1.416698 | 0.224182 |
| CCCTC-binding factor (zinc finger protein)                                        | 1.304042 | 1.002359 | 0.528441 |
| Heterogeneous nuclear ribonucleoprotein D (AU-rich element)                       | 1.033334 | 0.764441 | 0.414672 |
| F-box protein 11                                                                  | 0.883728 | 1.615732 | 0.391098 |
| Similar to Solute carrier family 30 (zinc transporter), member 1                  | 1.226736 | 1.420109 | 0.455107 |
| palmitoyl-protein thioesterase 1 (ceroid-lipofuscinosis, neuronal)                | 1.593126 | 0.866643 | 0.317759 |
| ATP-binding cassette, sub-family C (CFTR/MRP), member 6                           |          |          |          |
| COX10 homolog, cytochrome c oxidase assembly protein, heme A: farnesyltransferase |          |          | 0.083674 |
| caldesmon 1                                                                       | 2.712007 | 1.40405  | 1.279848 |
| Hypothetical protein LOC769096                                                    | 6.410654 | 1.229453 |          |
| solute carrier family 25, member 13 (citrin)                                      | 0.901436 | 1.120369 | 0.407772 |
| chromosome 5 open reading frame 35                                                | 0.488735 | 0.861232 | 0.568708 |
| lysocardiolipin acyltransferase                                                   | 2.064216 | 2.468146 | 0.66875  |
| ubiquitin protein ligase E3B                                                      | 1.51625  | 0.850945 | 0.853953 |
| hypothetical gene supported by CR406014                                           | 0.861245 | 0.555147 | 0.534767 |
| Zinc finger CCCH-type containing 12D                                              | 1.289016 | 3.094465 | 2.570006 |
| Potassium channel tetramerisation domain containing 9                             |          | 2.37186  | 0.378989 |
| ADAM metallopeptidase domain 8                                                    |          |          |          |
| chromosome 4 open reading frame 29                                                | 2.020431 | 0.816758 | 0.60903  |
| tectonin beta-propeller repeat containing 1                                       | 2.202789 | 0.944285 | 0.552047 |
| Hypothetical LOC421802                                                            | 0.516884 | 0.487095 | 0.53771  |
| serine/threonine kinase 25 (STE20 homolog, yeast)                                 | 0.610779 | 1.344583 | 0.021895 |
| mesoderm development candidate 1                                                  | 1.644511 | 0.923695 | 0.610211 |
| Nucleolar protein family A, member 1 (H/ACA small nucleolar RNA binding protein)  | 2.046313 | 9.206406 | 0.070311 |
| Y box binding protein 1                                                           | 1.662375 | 0.593853 | 0.666897 |
| formin binding protein 1                                                          | 0.75214  | 1.116047 | 0.381216 |
| similar to MGC80370 protein                                                       |          | 2.150274 |          |
| Hypothetical protein LOC777054                                                    | 2.330263 | 1.263289 | 1.012839 |
| fragile X mental retardation, autosomal homolog 1                                 | 1.22185  | 0.771558 | 0.435573 |
| ADAM metallopeptidase domain 32                                                   | 0.31602  |          | 1.464488 |
| benzodiazapine receptor (peripheral) associated protein 1                         | 0.973837 | 1.128692 | 0.664165 |
| PHD finger protein 20-like 1                                                      | 0.952439 | 1.036975 | 0.486855 |
| KIAA0774                                                                          |          |          | 0.098993 |
| fibroblast growth factor receptor substrate 3                                     | 1.61129  | 0.541619 |          |

|                                                           |          |          |          |
|-----------------------------------------------------------|----------|----------|----------|
| UDP-GlcNAc:betaGal beta-1,3-N-acetylglucosaminyltransfe   | 0.838631 | 1.347979 | 0.474077 |
| GC-rich promoter binding protein 1                        | 0.46507  | 0.964759 | 1.339788 |
| DD1 protein                                               | 1.006008 |          | 1.492585 |
| human immunodeficiency virus type I enhancer binding prot | 0.93781  | 0.739742 | 0.444537 |
| Myeloma overexpressed 2                                   | 0.482718 | 1.102012 | 0.791363 |
| Phospholipase A2, group XIIA                              | 1.339767 | 1.013556 | 2.497732 |
| RAS-like, family 10, member B                             | 0.179721 | 1.61938  | 1.727508 |
| protein tyrosine phosphatase, receptor type, T            |          |          |          |
| Hypothetical protein LOC770534                            |          |          | 6.648183 |
| protein phosphatase methylesterase 1                      | 0.424281 | 1.789542 | 2.357965 |
| FK506 binding protein 15, 133kDa                          | 0.992003 | 0.892911 | 2.042445 |
| nipsnap homolog 1 (C. elegans)                            | 0.930039 | 1.287366 | 2.267678 |
| hypothetical protein LOC768803                            |          | 0.569987 | 0.627161 |
| hypothetical protein LOC768803                            | 0.43131  | 1.053238 | 0.921787 |
| coiled-coil domain containing 92                          | 0.821986 | 1.110565 | 0.442622 |
| carbonic anhydrase XII                                    |          |          | 0.076937 |
| Forkhead box K2                                           | 1.58397  | 1.010217 | 0.424778 |
| chromogranin A (parathyroid secretory protein 1)          | 1.77722  | 1.946145 | 9.754737 |
| LOC416951                                                 | 1.309207 | 0.705277 | 0.454999 |
| hypothetical protein LOC771106                            | 1.755658 | 0.696648 | 0.435641 |
| Cell division cycle associated 8                          | 3.38928  | 0.87467  | 0.439289 |
| Similar to trans-Golgi protein GMx33                      | 9.36847  | 1.400062 | 0.106722 |
| Similar to putative selenoprotein O                       | 1.633753 | 0.689956 | 1.012845 |
| oral cancer overexpressed 1                               | 1.472665 | 0.819972 | 0.615998 |
| Family with sequence similarity 91, member A1             | 1.879484 | 0.839826 | 0.198203 |
| Hypothetical protein LOC771190                            | 2.046511 | 1.386291 | 2.828574 |
| Coiled-coil domain containing 72                          | 1.149626 | 0.640856 | 0.118313 |
| Hypothetical LOC427838                                    | 1.455157 | 7.983209 | 1.557882 |
| chromosome 14 open reading frame 83                       | 1.39272  | 0.818494 | 0.654547 |
| WSC domain containing 2                                   | 0.487666 | 2.429091 | 1.646325 |
| G protein-coupled receptor kinase interactor 1            | 2.361571 |          |          |
| Protein tyrosine phosphatase, receptor type, R            | 2.130346 | 1.184291 | 3.65227  |
| Sodium channel, voltage gated, type VIII, alpha subunit   | 3.194932 | 0.681901 | 0.317834 |
| bromodomain adjacent to zinc finger domain, 1A            | 0.468043 | 1.516349 | 1.446139 |
| similar to RIKEN cDNA A830006F12 gene                     | 0.491729 | 1.133414 | 0.951799 |
| Similar to normal mucosa of esophagus specific 1          | 3.730888 | 1.341368 | 2.480521 |
| Similar to MS1                                            | 0.578866 | 0.683162 | 4.85152  |
| lemur tyrosine kinase 2                                   | 0.632167 | 0.197985 |          |
| coiled-coil domain containing 132                         | 0.561011 | 3.059242 | 1.026586 |
| interferon-related developmental regulator 1              | 0.92665  | 1.011424 | 0.281159 |



|                                                                |          |          |          |
|----------------------------------------------------------------|----------|----------|----------|
| solute carrier family 16, member 1 (monocarboxylic acid tra    | 1.037094 | 1.057965 | 2.137142 |
| BRCA1 associated RING domain 1                                 | 1.058925 | 1.298146 | 1.057887 |
| protein tyrosine phosphatase, receptor type, T                 |          |          |          |
| xylosyltransferase I                                           | 1.13942  | 1.832423 | 1.561847 |
| interleukin 18 (interferon-gamma-inducing factor)              | 3.910009 | 1.389383 | 2.834343 |
| calcium channel, voltage-dependent, beta 4 subunit             | 1.082685 | 0.701118 | 0.410842 |
| gametogenetin binding protein 2                                | 1.175113 | 0.89742  | 0.73984  |
| t-complex 11 (mouse)-like 2                                    | 0.975935 | 0.976744 | 2.07422  |
| stathmin 1                                                     | 0.53652  | 1.060916 | 0.502847 |
| anti-Mullerian hormone                                         |          |          | 1.82524  |
| lipoprotein lipase                                             | 0.865271 | 2.332225 | 11.95701 |
| slow muscle troponin T                                         | 1.021312 | 1.519328 | 2.889678 |
| collagen, type VI, alpha 1                                     | 1.68955  | 1.682683 | 2.902373 |
| interleukin 10 receptor, beta                                  | 1.632742 | 1.363772 | 1.017059 |
| cytochrome P-450 2C45                                          |          | 1.287058 | 4.025112 |
| intestinal zipper protein                                      | 2.280811 |          |          |
| glucagon                                                       | 2.038884 | 1.325308 | 2.39405  |
| glucagon                                                       | 3.046135 | 1.381676 | 1.037291 |
| NK2 transcription factor related, locus 6 (Drosophila)         |          |          | 0.171451 |
| forkhead box A2                                                | 1.119822 | 1.756248 | 2.559201 |
| bHLH transcription factor beta3                                | 3.424382 | 1.302846 | 2.602551 |
| thrombopoietin                                                 | 0.950877 |          |          |
| homeobox A7                                                    | 0.496709 | 0.679575 | 0.397105 |
| zinc finger protein 313                                        | 0.839531 | 0.813916 | 0.367313 |
| LIM and senescent cell antigen-like domains 1 /// hypothetical | 0.365523 | 3.522506 | 0.941903 |
| cadherin 13, H-cadherin (heart)                                | 1.756945 | 2.880154 | 6.230001 |
| aldehyde dehydrogenase 3 family, member B1 /// similar to 1    | 1.408528 |          | 0.335029 |
| cytochrome P450 A 37                                           | 1.402543 | 1.566933 | 2.564651 |
| ST8 alpha-N-acetyl-neuraminide alpha-2,8-sialyltransferase 3   |          |          | 2.442629 |
| iroquois homeobox 4                                            | 0.022386 |          | 0.966549 |
| iroquois homeobox 4                                            |          |          |          |
| fibroblast growth factor 13                                    |          |          | 14.69022 |
| cholecystokinin                                                | 2.116844 | 3.976333 | 1.826861 |
| beta-defensin 12                                               |          | 0.148092 |          |
| Gal 5                                                          | 0.394012 | 0.81218  | 0.309427 |
| Gal 4                                                          | 0.419988 | 1.628073 |          |
| Gal 7                                                          | 0.326109 |          | 1.451431 |
| cytochrome P450 2H1                                            | 1.472301 | 4.223658 | 3.410433 |
| cytochrome P450, family 2, subfamily C, polypeptide 18         | 0.924355 | 5.67421  | 6.422395 |
| cytochrome P450, family 2, subfamily C, polypeptide 18         | 2.030014 | 14.32135 | 4.453572 |

|                                                               |          |          |          |
|---------------------------------------------------------------|----------|----------|----------|
| cadherin 2, type 1, N-cadherin (neuronal)                     | 2.012161 | 1.301523 | 1.567573 |
| cathelicidin antimicrobial peptide                            | 0.230572 |          | 50.75547 |
| ST8 alpha-N-acetyl-neuraminide alpha-2,8-sialyltransferase 6  |          |          |          |
| piggyBac transposable element derived 3                       |          | 2.515413 |          |
| galactosamine (N-acetyl)-6-sulfate sulfatase (Morquio syndr   | 0.46016  | 0.788153 | 0.356416 |
| ARP3 actin-related protein 3 homolog B (yeast)                |          |          | 0.488233 |
| histone deacetylase 7A                                        | 0.78973  | 0.689794 | 0.462368 |
| DEAD (Asp-Glu-Ala-Asp) box polypeptide 51                     | 1.223127 | 1.017289 | 0.844055 |
| protein tyrosine phosphatase, non-receptor type 5 (striatum-e | 12.8928  |          | 2.602392 |
| interferon-induced protein with tetratricopeptide repeats 5   | 9.720315 | 3.856989 | 4.438786 |
| WD repeat domain 53                                           | 1.107335 | 0.814694 | 0.444827 |
| DEAD (Asp-Glu-Ala-Asp) box polypeptide 46                     | 0.962617 | 0.911304 | 0.592012 |
| 1-acylglycerol-3-phosphate O-acyltransferase 6 (lysophosph    | 0.968495 | 1.110232 | 1.504696 |
| solute carrier family 16, member 12 (monocarboxylic acid tr   | 0.713129 | 5.647218 |          |
| kelch-like 22 (Drosophila)                                    | 0.754034 | 1.0317   | 3.442358 |
| angiomotin like 2                                             |          | 6.570074 |          |
| hemopoietic cell kinase                                       | 2.101895 | 0.85075  | 1.933918 |
| hemopoietic cell kinase                                       | 4.957073 | 2.156935 | 3.471772 |
| nucleolar complex associated 3 homolog (S. cerevisiae)        | 0.761511 | 1.081122 | 0.499112 |
| perilipin                                                     | 1.343015 | 2.040622 | 1.779939 |
| additional sex combs like 1 (Drosophila)                      | 1.702142 | 0.769719 | 2.472158 |
| chromosome 15 open reading frame 42                           | 0.405556 | 1.166877 | 0.612186 |
| centrosomal protein 63kDa                                     | 16.7407  | 0.626097 |          |
| dual specificity phosphatase 8                                | 0.965438 |          | 0.143531 |
| mitogen-activated protein kinase kinase kinase 13             | 0.840139 |          | 0.607354 |
| similar to ovary-specific MOB-like protein                    | 0.880082 | 1.210395 | 0.22334  |
| abhydrolase domain containing 2                               | 0.651046 | 1.25158  | 1.129031 |
| L-amino-acid oxidase precursor                                | 3.313757 |          | 3.743162 |
| ATP-binding cassette, sub-family C (CFTR/MRP), member 6       |          | 0.189426 |          |
| vacuolar protein sorting 8 homolog (S. cerevisiae)            | 1.013562 | 1.16561  | 2.277904 |
| fer-1-like 3, myoferlin (C. elegans)                          |          | 2.217816 | 1.688905 |
| NADPH oxidase 1                                               | 0.768636 | 1.235352 | 2.037678 |
| similar to glypican-5                                         |          |          |          |
| RAD50 homolog (S. cerevisiae)                                 | 2.226771 | 1.185131 | 1.584168 |
| RAD50 homolog (S. cerevisiae)                                 | 1.037405 | 1.135153 | 2.200114 |
| A kinase (PRKA) anchor protein 13                             | 0.929762 | 1.154564 | 2.916284 |
| spermatogenesis associated 20                                 |          |          |          |
| similar to MGC83953 protein                                   | 0.523478 | 1.294072 | 0.242162 |
| lysophospholipase 3 (lysosomal phospholipase A2)              | 0.788247 | 1.259141 | 0.22716  |
| phospholipid transfer protein                                 | 0.819698 | 1.349475 | 3.066793 |

|                                                                     |          |          |          |
|---------------------------------------------------------------------|----------|----------|----------|
| eukaryotic translation initiation factor 4E nuclear import factor 1 | 1.059875 | 3.105782 |          |
| discs, large homolog 1 (Drosophila)                                 | 1.946899 |          | 0.022335 |
| choline kinase alpha                                                | 2.655276 | 0.912897 | 0.509997 |
| similar to MGC64341 protein                                         | 0.558117 | 0.820919 | 0.051395 |
| similar to p150 target of rapamycin (TOR)-scaffold protein c        | 1.010753 | 1.035478 | 0.108588 |
| ATP-binding cassette, sub-family A (ABC1), member 12                | 0.525393 | 0.787471 | 0.248611 |
| CDK5 regulatory subunit associated protein 2                        | 0.850047 | 2.123318 | 0.897448 |
| sphingomyelin phosphodiesterase 3, neutral membrane (neut           | 1.21259  | 1.005512 | 0.40566  |
| multiple EGF-like-domains 9                                         | 1.642493 | 1.977469 |          |
| copine VIII                                                         | 1.324629 |          | 2.300081 |
| copine VIII                                                         | 1.484502 | 0.353027 | 1.873754 |
| cell adhesion molecule 1                                            | 0.841293 | 1.376885 | 1.036308 |
| pitrilysin metallopeptidase 1                                       |          | 2.042041 |          |
| hypothetical LOC425659                                              | 1.502566 |          |          |
| chromobox homolog 8 (Pc class homolog, Drosophila)                  | 0.54792  | 0.649345 | 0.290415 |
| DnaJ (Hsp40) homolog, subfamily C, member 8                         | 0.696284 | 1.268318 | 0.556268 |
| ankyrin repeat and SOCS box-containing 7                            |          | 1.197043 | 0.303131 |
| chromosome 5 open reading frame 33                                  | 1.209504 | 1.294067 | 3.011512 |
| similar to BC033915 protein                                         | 3.10471  |          | 4.975729 |
| similar to BC033915 protein                                         | 0.784694 | 1.18796  | 2.170712 |
| chondroitin sulfate synthase 1                                      |          |          | 0.068816 |
| mitochondrial ribosomal protein L12                                 | 0.495407 | 0.977157 | 0.97893  |
| interleukin 1 receptor accessory protein                            | 0.88922  | 0.882789 | 0.999808 |
| peroxisomal biogenesis factor 11 gamma                              | 0.842153 | 1.176272 | 4.081269 |
| Ca <sup>2+</sup> -dependent secretion activator                     | 0.816388 | 1.29441  | 1.518504 |
| Ca <sup>2+</sup> -dependent secretion activator                     | 0.51286  | 2.632511 | 1.19585  |
| Ca <sup>2+</sup> -dependent secretion activator                     | 0.377451 |          |          |
| hypothetical LOC428323                                              | 0.844936 | 5.780867 |          |
| heat shock 70kDa protein 4                                          | 1.084144 | 0.998311 | 0.455846 |
| transmembrane protein 130                                           | 3.574982 | 0.789923 | 2.290257 |
| KIAA0174                                                            | 1.166952 | 1.143883 | 0.326665 |
| tumor protein p63                                                   | 0.714066 | 0.208648 | 0.719151 |
| catenin (cadherin-associated protein), delta 1                      |          |          | 2.397982 |
| somatostatin                                                        | 2.044411 | 1.257789 | 5.988626 |
| zinc finger, DHHC-type containing 5                                 | 5.668034 | 0.653384 | 1.001414 |
| WW domain containing adaptor with coiled-coil                       | 2.154536 |          |          |
| acyltransferase like 1                                              | 1.054844 | 1.48781  | 0.9954   |
| COX15 homolog, cytochrome c oxidase assembly protein (y             | 0.764426 | 1.107596 | 1.342998 |
| phosphate cytidylyltransferase 1, choline, alpha                    | 0.706785 | 0.730301 | 0.492194 |
| DENN/MADD domain containing 4A                                      | 0.680953 | 2.067449 | 0.4509   |

|                                                                     |          |          |          |
|---------------------------------------------------------------------|----------|----------|----------|
| hypothetical protein LOC770883                                      | 0.994176 | 0.061674 |          |
| leucine-rich repeats and calponin homology (CH) domain containing 3 |          |          |          |
| mahogunin, ring finger 1                                            | 0.757014 | 0.982952 | 1.563336 |
| amine oxidase (flavin containing) domain 2                          | 0.28929  | 0.984831 | 0.682405 |
| ADAM metalloproteinase domain 28                                    | 1.182003 | 0.910188 | 2.228148 |
| DOT1-like, histone H3 methyltransferase ( <i>S. cerevisiae</i> )    |          | 0.508237 |          |
| BTB (POZ) domain containing 12                                      | 2.063733 | 0.756311 | 0.549335 |
| myosin IIIA                                                         |          | 1.627306 | 0.429044 |
| signal transducer and activator of transcription 1, 91kDa           | 4.189686 | 1.839424 | 2.880142 |
| RAE1 RNA export 1 homolog ( <i>S. pombe</i> )                       | 0.871341 | 1.017267 | 0.378273 |
| B-cell CLL/lymphoma 9-like                                          | 2.722704 | 0.50894  | 1.027222 |
| armadillo repeat containing 9                                       | 0.279516 | 0.853141 | 1.311913 |
| myosin IB                                                           | 3.689026 | 1.073914 | 0.644099 |
| myosin IB                                                           | 0.830227 |          | 0.129668 |
| F-box and WD repeat domain containing 4                             | 0.406155 | 1.344193 | 1.009051 |
| Rho GTPase activating protein 21                                    | 2.450396 | 2.703679 | 1.236527 |
| KIAA2022                                                            |          | 6.013168 |          |
| KIAA1217                                                            |          |          | 5.801391 |
| Similar to KIAA1217 protein                                         | 1.988259 | 2.443818 | 2.457479 |
| docking protein 5                                                   | 1.298099 | 0.649654 | 0.164046 |
| hypothetical LOC415641 /// similar to rat GCP360                    | 3.402462 | 0.866237 | 0.613583 |
| chromosome 17 open reading frame 28                                 |          |          |          |
| KIAA1841                                                            |          | 0.334547 |          |
| Similar to tetratricopeptide repeat domain 12                       | 1.393845 | 1.414842 |          |
| similar to pyruvate dehydrogenase complex, component X              |          |          | 0.431859 |
| alpha thalassemia/mental retardation syndrome X-linked              | 0.867738 | 0.890166 | 0.430794 |
| chromosome 11 open reading frame 57                                 | 0.343033 | 0.395867 | 1.134278 |
| sperm associated antigen 6                                          | 0.467115 |          |          |
| sperm associated antigen 6                                          | 0.038904 |          |          |
| myeloid/lymphoid or mixed-lineage leukemia (trithorax hom           | 8.678377 | 0.645973 | 0.306455 |
| mitogen-activated protein kinase kinase 5                           | 8.578166 | 2.092991 | 1.835904 |
| PH domain and leucine rich repeat protein phosphatase-like          | 1.023474 | 1.003138 | 2.064117 |
| solute carrier family 16, member 5 (monocarboxylic acid tra         | 4.366852 | 2.083733 |          |
| ATPase, Ca <sup>++</sup> transporting, plasma membrane 4            |          | 0.404397 | 1.655632 |
| transmembrane protein 209                                           |          |          | 0.050876 |
| transmembrane protein 209                                           |          |          | 0.230264 |
| tRNA splicing endonuclease 54 homolog ( <i>S. cerevisiae</i> )      | 1.864582 | 0.67941  | 0.241292 |
| myotubularin related protein 3                                      | 0.540093 | 0.46253  | 1.719298 |
| HMG-box transcription factor 1                                      | 0.992003 | 0.871104 | 0.373824 |
| PR domain containing 11                                             | 1.033946 | 1.070326 | 4.277841 |

|                                                                      |          |          |          |
|----------------------------------------------------------------------|----------|----------|----------|
| hypothetical protein LOC770890                                       | 1.077663 | 2.800731 | 2.986177 |
| mesoderm specific transcript homolog (mouse)                         | 1.922086 | 1.305161 | 0.085672 |
| olfactory receptor OR35                                              | 0.832135 |          | 2.544768 |
| chromosome 2 open reading frame 60                                   | 1.185989 | 0.727687 | 0.529025 |
| similar to olfactory receptor 2                                      | 1.646778 | 1.256854 | 0.060262 |
| SFRS protein kinase 2                                                | 1.357777 | 0.855333 | 0.28286  |
| SFRS protein kinase 2                                                | 1.284456 | 0.909886 | 0.241777 |
| spectrin, beta, non-erythrocytic 1                                   | 0.869142 | 1.098673 | 0.541276 |
| ankyrin repeat domain 34A                                            | 1.222303 | 2.112959 |          |
| hypothetical LOC424944                                               |          |          |          |
| coiled-coil domain containing 146                                    | 0.387036 |          | 2.183199 |
| arginine decarboxylase                                               | 1.122411 | 0.776704 | 2.283568 |
| arginyl aminopeptidase (aminopeptidase B)-like 1                     |          |          | 0.426432 |
| arginyl aminopeptidase (aminopeptidase B)-like 1                     | 2.059105 | 1.812453 | 0.761755 |
| cytoskeleton associated protein 5                                    | 0.646496 | 1.062912 | 0.312321 |
| cytoskeleton associated protein 5                                    | 1.267204 | 1.52671  | 0.258393 |
| solute carrier family 24 (sodium/potassium/calcium exchanger), membe |          | 0.488138 | 0.987739 |
| GDNF-inducible zinc finger protein 1                                 |          | 1.510327 |          |
| GDNF-inducible zinc finger protein 1 /// zinc finger protein 1       | 4.715968 |          |          |
| GDNF-inducible zinc finger protein 1                                 | 0.963852 | 0.876408 | 1.124876 |
| amyotrophic lateral sclerosis 2 (juvenile) chromosome region         | 1.060724 | 0.892403 | 0.479469 |
| chromosome 20 open reading frame 19                                  | 0.455965 | 0.235454 | 0.502054 |
| ankyrin repeat domain 12                                             | 0.94338  | 0.959904 | 0.480412 |
| amyotrophic lateral sclerosis 2 (juvenile)                           | 1.144555 | 0.736084 | 0.390281 |
| zinc finger and BTB domain containing 34                             | 2.04816  | 0.912552 | 0.368164 |
| guanine nucleotide binding protein, alpha transducing 3              | 0.485066 |          | 0.013298 |
| solute carrier family 35, member B4                                  |          |          | 0.41433  |
| solute carrier family 35, member B4                                  | 0.426664 | 1.845008 | 1.059354 |
| heterogeneous nuclear ribonucleoprotein L-like                       | 1.158113 | 0.980404 | 0.499437 |
| aspartyl-tRNA synthetase 2, mitochondrial                            |          |          | 0.129636 |
| delta-like 4 (Drosophila)                                            |          | 0.121923 | 0.187479 |
| family with sequence similarity 125, member B                        | 0.571533 | 0.265324 | 0.286939 |
| nuclear receptor subfamily 2, group C, member 2                      | 1.079419 | 1.174863 | 0.325005 |
| bromodomain containing 1                                             | 1.111119 | 0.715575 | 0.282412 |
| bromodomain containing 1                                             | 1.056923 | 0.857417 | 0.409575 |
| asparagine-linked glycosylation 12 homolog (S. cerevisiae, a         | 2.33511  | 0.947389 | 0.340374 |
| FYVE, RhoGEF and PH domain containing 5                              |          | 0.026723 |          |
| zinc finger, BED-type containing 4                                   |          | 1.258977 |          |
| zinc finger, BED-type containing 4                                   | 1.430055 | 0.946285 | 0.511286 |
| INO80 complex homolog 1 (S. cerevisiae)                              | 0.728609 | 1.940629 | 0.664151 |

|                                                           |          |          |          |
|-----------------------------------------------------------|----------|----------|----------|
| interleukin 17 receptor E-like                            | 0.494758 | 0.868359 | 0.516639 |
| FK506 binding protein 5                                   | 0.740458 | 1.571545 | 7.136981 |
| IQ motif containing GTPase activating protein 1           | 1.478177 | 1.001455 | 0.425787 |
| family with sequence similarity 125, member B             | 0.723514 | 0.169024 | 0.84633  |
| mitogen-activated protein kinase 11                       |          |          | 0.097831 |
| mitogen-activated protein kinase 11                       | 2.191586 | 0.936496 | 1.507974 |
| leukocyte receptor tyrosine kinase                        | 0.371352 | 0.557829 |          |
| general transcription factor IIH, polypeptide 4, 52kDa    | 1.760865 | 1.127858 | 4.355519 |
| MAX gene associated                                       | 1.599822 | 0.931431 | 0.488286 |
| activating transcription factor 2                         | 1.560228 | 1.026145 | 0.338914 |
| Ras association (RalGDS/AF-6) and pleckstrin homology do  | 1.126238 | 0.945869 | 0.382926 |
| solute carrier family 25, member 43                       | 0.183753 | 1.38337  |          |
| cubilin (intrinsic factor-cobalamin receptor)             |          | 3.081995 | 0.552477 |
| chromosome 20 open reading frame 23                       | 1.045163 | 1.836558 | 4.965624 |
| chromosome 20 open reading frame 23                       | 1.052751 | 1.08914  | 1.059106 |
| WD repeat domain 85                                       |          |          | 0.118924 |
| synovial sarcoma, X breakpoint 2 interacting protein      |          | 2.138176 |          |
| synovial sarcoma, X breakpoint 2 interacting protein      | 0.621129 | 0.683188 | 0.369001 |
| chromosome 10 open reading frame 38                       | 1.221428 | 1.543957 | 0.8402   |
| spermatogenesis associated 1                              | 1.714178 |          | 2.095721 |
| leucine rich repeat and sterile alpha motif containing 1  | 0.68736  | 0.910979 | 2.034669 |
| aftiphilin                                                | 0.864366 | 1.246432 | 0.467764 |
| aftiphilin                                                | 1.573841 | 0.442113 | 0.655293 |
| ATPase, class VI, type 11B                                | 1.103858 | 2.167988 | 0.391465 |
| ATPase, class VI, type 11B                                |          | 1.351092 | 0.228583 |
| thioredoxin domain containing 13                          | 1.171747 | 0.759006 | 0.78624  |
| WD repeat domain 31                                       | 2.306766 |          |          |
| phospholipase C, beta 1 (phosphoinositide-specific)       |          |          | 1.905853 |
| EGF, latrophilin and seven transmembrane domain containin | 2.166648 | 1.11428  | 2.830083 |
| ring finger protein 208                                   |          | 0.381273 |          |
| EH domain binding protein 1                               | 0.847566 | 1.715117 | 0.815523 |
| F-box protein 11                                          | 1.795756 | 0.924146 | 0.584792 |
| p21(CDKN1A)-activated kinase 7                            | 0.291444 |          | 11.44774 |
| mitogen-activated protein kinase kinase kinase kinase 4   | 0.705918 | 0.90275  | 0.773455 |
| elongation factor Tu GTP binding domain containing 2      | 0.887108 | 0.977646 | 0.799302 |
| transmembrane protein 16C                                 |          |          |          |
| chromosome X open reading frame 57                        | 1.085136 | 0.557829 | 0.860143 |
| McKusick-Kaufman syndrome                                 | 1.646257 | 0.786986 | 0.374922 |
| transmembrane protein 87A                                 | 0.547948 | 1.28126  | 0.862042 |
| lipocalin 15                                              | 5.26941  | 2.972869 | 1.620777 |

|                                                              |          |          |          |
|--------------------------------------------------------------|----------|----------|----------|
| hypothetical LOC420542                                       |          | 0.503599 |          |
| hypothetical LOC420542                                       | 1.07388  |          | 0.079503 |
| solute carrier family 13 (sodium-dependent dicarboxylate tra | 0.099347 | 3.228088 |          |
| titin                                                        |          |          |          |
| myotubularin 1                                               | 1.082492 | 0.634455 | 0.456504 |
| forkhead box N1                                              | 1.920615 | 0.919203 | 0.340928 |
| ankyrin repeat domain 26                                     | 24.51914 | 1.374497 | 0.617932 |
| ankyrin repeat domain 26                                     | 0.439966 | 1.299602 | 0.636602 |
| centrosomal protein 27kDa                                    | 0.784555 | 1.159868 | 0.464998 |
| diacylglycerol O-acyltransferase homolog 2 (mouse)           | 1.581529 | 0.885141 | 0.495361 |
| unc-119 homolog (C. elegans)                                 |          |          | 2.410209 |
| attractin-like 1                                             |          | 2.859176 |          |
| epithelial cell transforming sequence 2 oncogene             |          | 1.16195  | 0.058513 |
| CDC42 binding protein kinase alpha (DMPK-like)               | 1.008274 | 1.591994 | 2.001981 |
| cyclin F                                                     | 0.828956 | 1.363803 | 0.457119 |
| hypothetical protein LOC770184                               | 0.297978 | 0.850896 | 0.620433 |
| TBC1 domain family, member 24                                | 0.733461 | 1.010838 | 0.078244 |
| ubiquitin protein ligase E3 component n-recognin 1           | 0.453282 |          | 0.298235 |
| ubiquitin protein ligase E3 component n-recognin 1           |          |          | 2.390709 |
| phospholipase D1, phosphatidylcholine-specific               |          |          | 0.26267  |
| benzodiazapine receptor (peripheral) associated protein 1    | 1.117631 | 0.846668 | 0.826058 |
| benzodiazapine receptor (peripheral) associated protein 1    |          |          |          |
| Fanconi anemia, complementation group F                      | 0.763835 | 1.310036 | 0.444994 |
| TRAF2 and NCK interacting kinase                             | 2.495747 | 0.869665 | 1.132451 |
| cornichon homolog 3 (Drosophila)                             |          |          | 0.418676 |
| Obg-like ATPase 1                                            | 0.60985  | 0.964472 | 0.458706 |
| eukaryotic translation initiation factor 3, subunit A        | 0.471941 | 1.163594 | 0.676751 |
| Crm, cramped-like (Drosophila)                               | 1.363634 | 0.438073 | 0.50453  |
| erythrocyte membrane protein band 4.1-like 1                 | 0.72395  | 2.38728  | 1.729686 |
| regulator of G-protein signaling 6                           |          |          |          |
| suppression of tumorigenicity 7                              |          | 1.576675 | 2.34513  |
| ankyrin repeat and IBR domain containing 1                   |          | 5.662854 | 0.435008 |
| leucine rich repeat containing 34                            | 2.472031 | 0.652737 | 1.112037 |
| dispatched homolog 1 (Drosophila)                            |          | 2.955098 |          |
| ecotropic viral integration site 1                           | 4.393488 | 0.577306 | 1.24148  |
| golgi integral membrane protein 4                            | 0.471397 | 0.72394  | 0.713253 |
| Rap guanine nucleotide exchange factor (GEF) 2               | 4.718527 | 1.359522 | 0.511572 |
| folliculin interacting protein 2                             | 2.039135 | 0.953539 | 0.689713 |
| neuropeptide Y receptor Y5                                   | 0.392235 | 0.460544 | 0.799953 |
| RAB3 GTPase activating protein subunit 2 (non-catalytic)     | 2.199235 | 0.869949 | 0.465017 |

|                                                                              |          |          |          |
|------------------------------------------------------------------------------|----------|----------|----------|
| sucrase-isomaltase (alpha-glucosidase)                                       | 0.913085 | 2.225877 | 1.026489 |
| similar to mitochondrial methionine aminopeptidase 3                         | 2.921544 | 1.328321 | 0.159472 |
| transforming, acidic coiled-coil containing protein 2                        | 1.006234 | 0.924919 | 1.554748 |
| type XXIII collagen alpha 1 chain /// type XXIII collagen alpha 1            | 0.624065 |          | 1.207788 |
| tousled-like kinase 1                                                        | 1.583567 | 0.953095 | 0.48427  |
| tousled-like kinase 1                                                        | 1.07455  | 1.094343 | 0.43796  |
| ubiquitin-like domain containing CTD phosphatase 1                           | 0.823448 | 1.430448 | 0.23848  |
| membrane protein, palmitoylated 5 (MAGUK p55 subfamily)                      | 4.0621   | 1.128743 | 1.048411 |
| thrombospondin 1                                                             |          |          | 0.597214 |
| hypothetical LOC422427                                                       | 17.91866 | 2.73274  | 7.424909 |
| cholinergic receptor, muscarinic 5                                           | 3.786818 |          |          |
| collagen, type I, alpha 2                                                    | 0.832408 | 1.185218 | 0.416679 |
| amiloride-sensitive cation channel 1, neuronal (degenerin)                   | 0.268404 | 0.950963 | 0.600509 |
| arginine/serine-rich coiled-coil 1                                           | 1.102942 | 0.168413 | 1.175278 |
| sprouty-related, EVH1 domain containing 1                                    | 2.117909 | 1.510061 | 0.881266 |
| hematopoietic cell-specific Lyn substrate 1                                  | 1.102911 | 1.006936 | 1.079452 |
| similar to NADH dehydrogenase                                                | 0.95789  | 1.043368 | 0.313879 |
| MON2 homolog (S. cerevisiae)                                                 | 0.902613 | 0.942283 | 0.369021 |
| zinc finger protein 770                                                      | 1.819074 | 9.275853 | 0.041138 |
| inositol polyphosphate-4-phosphatase, type II, 105kDa                        | 0.969175 | 1.492094 | 1.711512 |
| transcriptional regulating factor 1                                          | 1.637672 | 1.453556 | 2.331739 |
| echinoderm microtubule associated protein like 4                             | 5.350184 | 1.023253 | 3.381628 |
| striatin, calmodulin binding protein 3                                       | 2.08958  | 1.43973  | 0.873514 |
| pleckstrin homology domain containing, family H (with MyTH4 domain) member 1 |          |          | 0.950846 |
| tyrosine kinase with immunoglobulin-like and EGF-like domains                | 0.58975  | 0.803537 | 5.50042  |
| RAB3A interacting protein (rabin3)                                           | 0.733653 | 0.912799 | 0.514014 |
| elongation of very long chain fatty acids (FEN1/Elo2, SUR4)                  | 0.889824 | 1.427086 | 0.354545 |
| bromodomain adjacent to zinc finger domain, 1A                               | 1.690938 | 1.398072 | 0.452656 |
| growth arrest-specific 7                                                     | 0.878995 | 1.78502  | 3.305367 |
| insulin receptor                                                             | 0.362467 |          | 0.159698 |
| dishevelled associated activator of morphogenesis 2                          | 0.848081 | 1.188746 | 2.106295 |
| jumonji domain containing 2A                                                 | 1.041559 | 0.832474 | 0.441573 |
| KIAA0082                                                                     | 2.821279 |          | 1.634926 |
| steroid 21-hydroxylase                                                       | 4.730613 |          |          |
| leucine-rich repeat-containing G protein-coupled receptor 5                  |          |          |          |
| coiled-coil domain containing 131                                            | 1.173225 | 1.093257 | 0.392836 |
| RAB21, member RAS oncogene family                                            | 0.914726 | 1.669721 | 0.373993 |
| F-box protein 33                                                             | 0.76568  | 1.444154 | 0.585623 |
| vacuolar protein sorting 13 homolog C (S. cerevisiae)                        | 2.699767 |          | 1.162717 |
| chromosome 14 open reading frame 44                                          | 0.654208 | 0.894459 | 1.848635 |



|                                                                      |          |          |          |
|----------------------------------------------------------------------|----------|----------|----------|
| major facilitator superfamily domain containing 8                    | 3.432963 | 0.968163 | 1.433695 |
| similar to KIAA1193 /// mesoderm induction early response            | 0.589916 | 1.028026 | 2.801037 |
| similar to acetyl-CoA synthetase 2-like                              | 1.050381 | 0.484096 | 0.972643 |
| similar to acetyl-CoA synthetase 2-like                              | 0.725009 |          |          |
| keratin 79                                                           |          | 3.933899 |          |
| latent transforming growth factor beta binding protein 3             | 0.404138 |          | 0.521589 |
| YLP motif containing 1                                               | 1.359442 | 0.76082  | 0.376548 |
| nucleophosmin/nucleoplasmin, 3                                       | 0.927157 | 1.519906 | 3.567424 |
| helicase with zinc finger                                            | 2.803421 | 0.903345 | 0.209293 |
| ribosomal protein S6 kinase-like 1                                   |          |          | 11.49658 |
| solute carrier family 33 (acetyl-CoA transporter), member 1          |          |          |          |
| similar to KIAA0612 protein                                          | 2.261571 | 0.700122 | 1.670662 |
| ceruloplasmin (ferroxidase)                                          | 1.62411  | 1.361411 | 0.272324 |
| Hermansky-Pudlak syndrome 3                                          | 0.810753 | 0.955954 | 0.733938 |
| latent transforming growth factor beta binding protein 1             | 1.749308 | 9.744562 | 0.380304 |
| early B-cell factor 3                                                | 2.348315 | 1.996922 | 3.074215 |
| AHA1, activator of heat shock 90kDa protein ATPase homolog 1 (yeast) |          |          | 0.19854  |
| SCL/TAL1 interrupting locus                                          |          |          | 0.393962 |
| solute carrier family 5 (sodium/glucose cotransporter), meml         | 3.77562  | 0.528212 |          |
| chromosome 1 open reading frame 165                                  | 1.076948 | 0.98999  | 0.898224 |
| Fc receptor family member                                            | 0.462865 |          |          |
| alanine-glyoxylate aminotransferase 2-like 1                         | 2.887218 | 0.497938 | 0.224219 |
| hairy and enhancer of split 5 (Drosophila)                           |          | 2.807822 |          |
| 3'-phosphoadenosine 5'-phosphosulfate synthase 1                     | 0.957415 | 1.142392 | 0.421815 |
| family with sequence similarity 82, member A                         | 0.375039 |          |          |
| family with sequence similarity 82, member A                         |          | 1.566716 | 0.82024  |
| similar to chromosome 14 open reading frame 145                      | 2.933726 | 1.1692   | 0.720814 |
| fibronectin leucine rich transmembrane protein 2                     |          |          |          |
| fasciculation and elongation protein zeta 2 (zygin II)               | 0.422375 |          | 1.088575 |
| similar to KIAA1546 protein                                          | 1.518472 | 0.962672 | 0.654257 |
| G protein-coupled receptor 65                                        | 1.221752 | 0.269898 | 1.925611 |
| G protein-coupled receptor 65                                        | 2.95183  | 1.336762 | 0.753795 |
| sorting nexin 25                                                     | 2.849456 | 0.882448 | 0.47264  |
| coiled-coil and C2 domain containing 1B                              | 0.032958 | 1.333011 |          |
| acyl-CoA synthetase long-chain family member 1                       | 1.503163 | 1.270209 | 1.427212 |
| zinc finger, CCHC domain containing 11                               | 1.793649 | 1.211366 | 0.905722 |
| coiled-coil domain containing 111                                    | 2.03921  | 1.278782 | 2.003169 |
| transcription factor B2, mitochondrial                               | 2.24831  | 0.64145  | 0.651805 |
| sterol carrier protein 2                                             | 2.047528 | 1.378501 | 2.845885 |
| echinoderm microtubule associated protein like 5                     | 0.849348 |          | 0.304323 |

|                                                                                     |          |          |          |
|-------------------------------------------------------------------------------------|----------|----------|----------|
| WW and C2 domain containing 2                                                       | 2.098504 | 1.495209 | 1.529986 |
| missing oocyte, meiosis regulator, homolog (Drosophila)                             | 0.795746 | 0.844441 | 1.066703 |
| coiled-coil domain containing 88C                                                   | 1.706516 | 0.731277 | 0.489234 |
| UDP-N-acetyl-alpha-D-galactosamine:polypeptide N-acetylglucosyl transferase         | 3.760844 | 0.609334 | 0.597196 |
| similar to RIKEN cDNA 2810410C14 gene                                               | 0.447704 | 1.320897 | 0.133745 |
| similar to RIKEN cDNA 2810410C14 gene                                               | 0.868069 | 0.719116 | 0.576283 |
| formin 2                                                                            |          | 2.778297 |          |
| golgi autoantigen, golgin subfamily a, 5                                            | 1.302075 | 1.183061 | 0.444857 |
| Fanconi anemia, complementation group D2                                            | 0.954537 | 1.30477  | 1.075294 |
| phosphatidic acid phosphatase type 2B                                               | 0.428508 | 0.761382 |          |
| spermatogenesis associated 4                                                        | 5.138623 |          | 1.115458 |
| complement component (3d/Epstein Barr virus) receptor 2                             | 2.101748 | 1.05364  | 1.260789 |
| sorting nexin 13                                                                    |          | 2.228022 |          |
| myb-like, SWIRM and MPN domains 1                                                   | 2.305855 | 1.777006 | 0.624591 |
| similar to MGC83505 protein /// retinol dehydrogenase 5 (11-cis/9-cis)              |          |          | 0.136914 |
| retinol dehydrogenase 5 (11-cis/9-cis)                                              | 0.733489 | 1.301131 | 0.072848 |
| chromodomain helicase DNA binding protein 9                                         | 2.637667 |          |          |
| integrin, beta 8                                                                    | 3.707721 |          |          |
| anthrax toxin receptor 2                                                            | 3.240504 |          |          |
| InaD-like (Drosophila)                                                              | 1.346249 | 0.795584 | 0.173151 |
| InaD-like (Drosophila)                                                              | 7.187179 |          |          |
| ankyrin repeat domain 38                                                            | 1.015388 | 0.536517 |          |
| nidogen 1                                                                           | 2.767054 | 5.981386 |          |
| dedicator of cytokinesis 7                                                          | 0.896434 | 0.532091 | 0.440893 |
| serpin peptidase inhibitor, clade A (alpha-1 antiproteinase, antitrypsin), member 4 |          |          | 7.025928 |
| similar to PWP2 periodic tryptophan protein homolog (yeast) /// similar to PWP2H    |          |          | 0.39606  |
| similar to PWP2 periodic tryptophan protein homolog (yeast) /// similar to PWP2H    |          |          | 0.393869 |
| signal-induced proliferation-associated 1 like 2                                    | 30.1645  | 1.008864 |          |
| signal-induced proliferation-associated 1 like 2                                    | 0.723248 | 7.424616 | 1.280856 |
| similar to C3 and PZP-like alpha-2-macroglobulin domain c                           | 0.574627 | 0.908778 | 0.977046 |
| homeobox A6                                                                         | 0.857769 | 0.7576   | 0.467682 |
| homeobox A11                                                                        | 5.037512 |          |          |
| Homeobox A10                                                                        |          |          | 2.180918 |
| protein tyrosine phosphatase, non-receptor type 13 (APO-1/C                         | 0.440561 | 0.998685 | 0.682265 |
| interferon induced with helicase C domain 1                                         | 3.67284  | 1.580525 | 1.775657 |
| Rho GTPase activating protein 24                                                    | 1.269804 | 1.550029 | 1.972131 |
| lin-54 homolog (C. elegans)                                                         | 2.619796 | 1.164898 | 2.049886 |
| similar to rapamycin insensitive companion of mTOR; rictor                          | 0.802627 | 0.654491 | 1.169053 |
| ALX homeobox 1                                                                      | 1.303664 | 7.240795 |          |
| chimerin (chimaerin) 2                                                              | 1.370207 | 4.618819 | 0.95483  |

|                                                                 |          |          |          |
|-----------------------------------------------------------------|----------|----------|----------|
| chromosome 12 open reading frame 29                             | 1.252374 | 1.839798 | 0.467863 |
| centrosomal protein 290kDa                                      | 1.151054 | 0.855317 | 2.296871 |
| centrosomal protein 290kDa                                      | 0.802301 | 1.323401 | 0.393011 |
| family with sequence similarity 120B                            | 2.734739 | 0.715348 | 1.058846 |
| chromosome 6 open reading frame 70                              | 1.555676 | 0.898454 | 1.138562 |
| placenta-specific 8                                             | 2.556402 | 3.535342 | 7.316953 |
| helicase, POLQ-like                                             | 1.355029 | 0.877662 | 0.709508 |
| phospholipase C, eta 2                                          |          |          |          |
| SATB homeobox 1                                                 | 1.389805 | 0.637786 | 0.117041 |
| WD repeat and FYVE domain containing 3                          | 0.496427 |          | 0.129829 |
| ATPase, Ca <sup>++</sup> transporting, plasma membrane 1        | 0.638688 | 2.436265 | 0.620639 |
| RAR-related orphan receptor A                                   | 1.761705 | 2.185779 | 4.137951 |
| RAR-related orphan receptor A                                   | 1.803001 | 1.322645 | 2.212553 |
| DEP domain containing 1                                         | 0.689835 | 0.990376 | 0.74222  |
| myeloid/lymphoid or mixed-lineage leukemia (trithorax hom       | 0.458249 | 0.718907 |          |
| homocysteine-inducible, endoplasmic reticulum stress-induc      | 1.203814 | 0.810331 | 0.403103 |
| protein kinase, AMP-activated, gamma 3 non-catalytic subur      | 0.863777 | 1.023818 | 0.883382 |
| chromosome 14 open reading frame 131                            | 0.373985 | 0.974685 | 1.725096 |
| Rab geranylgeranyltransferase, beta subunit                     | 0.917403 | 0.997848 | 0.623136 |
| ubiquitin specific peptidase 44                                 | 2.53378  | 0.508936 | 1.285444 |
| chromosome 17 open reading frame 38                             | 1.187107 | 1.047463 | 1.869407 |
| ubiquitin specific peptidase 37                                 | 2.179729 | 1.234634 | 0.689176 |
| CDC42 binding protein kinase beta (DMPK-like)                   | 6.939865 | 0.614311 | 0.927606 |
| septin 11                                                       | 0.765876 | 1.193913 | 1.968638 |
| nucleoporin 54kDa                                               | 0.859457 | 0.832168 | 0.479708 |
| apoptotic peptidase activating factor 1                         | 1.175984 | 1.300522 | 0.409119 |
| UHRF1 binding protein 1-like                                    |          | 0.574994 | 0.469608 |
| SIN3 homolog B, transcription regulator (yeast)                 | 0.45012  | 0.871393 | 1.191544 |
| RUN and FYVE domain containing 3                                | 0.52924  | 1.306609 | 0.497895 |
| RUN and FYVE domain containing 3                                |          | 2.447241 | 0.806718 |
| sirtuin (silent mating type information regulation 2 homolog)   | 0.640967 | 0.673043 | 0.362381 |
| solute carrier family 22 (organic cation transporter), member 2 |          | 0.374336 | 0.688369 |
| solute carrier family 22 (organic cation transporter), member   | 0.764115 |          |          |
| COX18 cytochrome c oxidase assembly homolog (S. cerevisiae)     |          | 9.467094 |          |
| similar to Nel-like 1                                           | 0.970946 | 0.844315 | 1.352991 |
| AHNAK nucleoprotein 2                                           |          | 0.020015 | 0.488998 |
| AHNAK nucleoprotein 2                                           | 0.825363 | 0.437526 | 1.263817 |
| protein disulfide isomerase family A, member 5                  | 0.649152 | 0.742161 | 0.552812 |
| ATP/GTP binding protein-like 3                                  |          | 0.686748 | 1.490736 |
| ubiquitin-activating enzyme E1-like 2                           | 0.86428  | 1.478843 | 1.824483 |

|                                                                  |          |          |          |
|------------------------------------------------------------------|----------|----------|----------|
| histone cluster 2, H2ac /// similar to histone 2, H2ac /// hypot | 0.488018 | 1.177055 | 0.623876 |
| leucine zipper transcription factor-like 1                       | 1.194552 | 1.767189 | 0.33498  |
| sulfotransferase family 1E, estrogen-preferring, member 1        | 1.127892 | 1.543838 | 1.584131 |
| LIM domains containing 1                                         | 0.500473 | 0.981363 | 0.345514 |
| FYN binding protein (FYB-120/130)                                | 5.088722 |          |          |
| FYN binding protein (FYB-120/130)                                | 0.661119 | 0.797831 | 0.276086 |
| kinesin family member 15                                         | 0.725776 | 1.155041 | 0.416667 |
| transmembrane protein 186                                        |          |          | 0.245083 |
| F-box and leucine-rich repeat protein 2                          | 26.80278 | 0.939385 |          |
| huntingtin interacting protein 1 related                         |          |          | 0.067769 |
| phosphodiesterase 5A, cGMP-specific                              | 1.405021 | 0.5364   | 0.842603 |
| SEC24 related gene family, member D (S. cerevisiae)              | 1.348237 | 0.972154 | 2.575632 |
| SEC24 related gene family, member D (S. cerevisiae)              |          | 2.685948 | 1.298743 |
| FYN binding protein (FYB-120/130)                                | 0.626211 | 0.835575 | 0.211078 |
| protease, serine, 12 (neurotrypsin, motopsin)                    | 0.318319 | 0.990607 | 0.506654 |
| solute carrier family 25 (mitochondrial carrier; peroxisomal)    | 0.592567 | 0.944186 | 0.45224  |
| similar to alpha 7A integrin                                     |          |          |          |
| arylsulfatase family, member J                                   | 0.945837 | 1.168702 | 1.083867 |
| solute carrier family 12 (potassium/chloride transporters), me   | 1.223279 | 1.02647  | 0.472894 |
| lupus brain antigen 1                                            | 1.926805 | 1.486282 | 1.747854 |
| interleukin 28B (interferon, lambda 3)                           | 1.104551 | 2.197305 |          |
| Fas apoptotic inhibitory molecule                                | 0.938411 | 0.9874   | 0.259636 |
| N-acetyltransferase 12                                           | 1.404453 | 1.184958 | 0.506917 |
| chromosome 14 open reading frame 108                             | 1.263112 | 1.091035 | 0.589438 |
| anillin, actin binding protein                                   | 0.853453 | 0.750201 | 0.682019 |
| reticulocalbin 1, EF-hand calcium binding domain                 |          | 0.041755 |          |
| chromosome 1 open reading frame 130                              | 0.806697 | 0.897119 | 0.263584 |
| solute carrier family 35, member F5                              | 8.111066 | 1.228368 | 0.983832 |
| hypothetical protein LOC769503 /// hypothetical protein LO       | 0.982271 | 0.930584 | 0.415087 |
| Bardet-Biedl syndrome 9                                          |          |          |          |
| sterile alpha motif domain containing 4A                         | 1.083199 | 1.458035 | 4.168526 |
| KIAA0241                                                         | 0.607443 | 0.948677 | 0.563496 |
| KIAA0241                                                         |          | 0.492778 | 0.66617  |
| cell growth regulator with ring finger domain 1                  | 1.335802 | 1.04227  | 0.16112  |
| cyclin T2                                                        | 2.146353 | 0.597278 | 1.162401 |
| kelch domain containing 1                                        | 1.374371 | 0.770421 | 0.909136 |
| R3H domain containing 1                                          | 1.679437 | 0.612182 | 0.516624 |
| DEAD (Asp-Glu-Ala-Asp) box polypeptide 17                        | 2.286445 | 0.966454 | 0.271417 |
| alcohol dehydrogenase 1C (class I), gamma polypeptide            | 0.501764 | 0.662273 | 0.40893  |
| utrophin                                                         |          |          |          |

|                                                                        |          |          |          |
|------------------------------------------------------------------------|----------|----------|----------|
| microsomal triglyceride transfer protein                               | 2.780808 |          |          |
| phospholipase A2, group VI (cytosolic, calcium-independent)            | 1.73534  | 0.831547 | 2.677398 |
| similar to T-cell receptor gamma V2.9                                  | 1.067948 | 1.113404 | 0.262559 |
| POU domain, class 6, transcription factor 2                            |          | 0.838646 |          |
| chromosome 7 open reading frame 11                                     | 1.062371 | 1.153512 | 0.558373 |
| Na <sup>+</sup> /H <sup>+</sup> exchanger domain containing 2          | 0.744149 | 1.177182 | 3.240933 |
| salvador homolog 1 (Drosophila)                                        | 0.644924 | 0.856458 | 0.195399 |
| mitogen-activated protein kinase kinase kinase 7 interacting           | 1.110644 | 0.899005 | 0.400311 |
| mitogen-activated protein kinase kinase kinase 7 interacting protein 2 |          | 2.549271 |          |
| ninein (GSK3B interacting protein)                                     | 1.389326 | 1.052059 | 0.475935 |
| chromosome 6 open reading frame 72                                     | 1.076895 | 1.380684 | 0.632649 |
| speckle-type POZ protein-like                                          | 1.593086 | 1.327588 | 0.235428 |
| protein phosphatase 1, regulatory (inhibitor) subunit 14C              |          | 0.86112  | 0.238284 |
| thioredoxin domain containing 16                                       | 0.227811 |          |          |
| golgi associated, gamma adaptin ear containing, ARF bindin             | 0.566499 | 0.758338 | 0.490768 |
| adenylate cyclase 1 (brain) /// similar to brain adenylate cycl        | 4.043867 |          | 0.278805 |
| zinc finger E-box binding homeobox 2                                   | 1.457929 |          | 1.017787 |
| HUS1 checkpoint homolog (S. pombe)                                     | 0.843059 | 0.844064 | 0.250003 |
| kinesin family member 5C                                               | 1.156601 | 1.496805 | 2.231306 |
| hypothetical LOC420793                                                 |          | 2.001496 |          |
| retinoblastoma-like 1 (p107)                                           | 1.148823 | 0.519461 | 0.15569  |
| nuclear transcription factor, X-box binding 1                          |          | 0.285668 |          |
| solute carrier family 12 (potassium/chloride transporters), m          | 0.494032 |          |          |
| solute carrier family 12 (potassium/chloride transporters), m          | 0.25714  |          |          |
| FAD-dependent oxidoreductase domain containing 2                       | 0.532595 | 3.23664  |          |
| myosin, heavy chain 9, non-muscle                                      |          |          | 0.428695 |
| glycerol-3-phosphate dehydrogenase 2 (mitochondrial)                   | 2.284689 | 1.194182 | 2.500966 |
| uridine phosphorylase 2                                                | 0.39345  |          | 0.966061 |
| tetratricopeptide repeat, ankyrin repeat and coiled-coil contai        | 2.636489 | 0.817091 | 1.01545  |
| zinc finger, CCHC domain containing 6                                  | 0.671233 | 0.751382 | 2.499522 |
| PR domain containing 4                                                 | 1.094649 | 0.773727 | 0.958528 |
| CDC14 cell division cycle 14 homolog C (S. cerevisiae)                 | 0.370285 | 0.305509 | 0.519432 |
| NUAK family, SNF1-like kinase, 1                                       | 0.43405  | 1.246594 |          |
| glycosylphosphatidylinositol specific phospholipase D1                 |          |          |          |
| KIAA1033                                                               | 0.971184 | 1.187316 | 0.469714 |
| CDK5 regulatory subunit associated protein 1-like 1                    | 0.363099 | 2.272597 | 0.667229 |
| CDK5 regulatory subunit associated protein 1-like 1                    | 0.83574  | 1.116693 | 0.452139 |
| membrane bound O-acyltransferase domain containing 1                   | 0.390958 | 0.846294 | 0.729823 |
| glucose-fructose oxidoreductase domain containing 1                    |          | 0.63008  | 0.030657 |
| N-acetylglucosamine-1-phosphate transferase, alpha and beta            | 0.80811  | 0.901184 | 0.211979 |

|                                                                     |          |          |          |
|---------------------------------------------------------------------|----------|----------|----------|
| N-acetylglucosamine-1-phosphate transferase, alpha and beta         | 1.36523  | 0.948196 | 0.109769 |
| lipic acid synthetase                                               | 0.943354 | 1.60556  | 0.492226 |
| heterogeneous nuclear ribonucleoprotein M                           | 1.02399  | 1.126911 | 0.214299 |
| desmoplakin                                                         | 1.226547 | 0.766503 | 0.216581 |
| desmoplakin                                                         | 0.687459 | 0.70949  | 0.418507 |
| desmoplakin                                                         | 0.800855 | 0.926888 | 0.337046 |
| LYR motif containing 4                                              | 0.459245 | 1.050137 | 1.208493 |
| chromodomain protein, Y-like                                        |          | 2.69185  | 0.746997 |
| PRP4 pre-mRNA processing factor 4 homolog B (yeast)                 | 1.426277 | 0.908046 | 0.570332 |
| chromosome 6 open reading frame 86                                  | 2.773239 | 0.761228 | 0.636588 |
| solute carrier family 37 (glycerol-3-phosphate transporter), n      | 1.757524 | 2.280804 | 1.279674 |
| DENN/MADD domain containing 2A                                      | 0.295713 |          | 0.173061 |
| cAMP responsive element binding protein 3-like 2                    | 0.720852 | 1.099971 | 0.404853 |
| diacylglycerol kinase, iota                                         | 0.496079 | 0.768383 | 0.637651 |
| diacylglycerol kinase, iota                                         |          | 1.584661 | 2.331013 |
| tubulin tyrosine ligase-like family, member 11                      |          |          | 1.028852 |
| tyrosyl-tRNA synthetase 2, mitochondrial                            | 2.400974 | 1.167434 | 0.658044 |
| dynamitin 1-like                                                    |          |          | 2.465023 |
| DENN/MADD domain containing 5B                                      | 0.165535 | 1.11798  | 1.58435  |
| myosin X                                                            | 1.009763 | 0.687692 | 0.058464 |
| myosin X                                                            | 0.917152 | 0.612382 | 0.309183 |
| tubulin tyrosine ligase-like family, member 11                      | 0.560226 | 0.847442 | 2.203418 |
| tubulin tyrosine ligase-like family, member 11                      | 0.740499 | 1.210558 | 2.216875 |
| chromosome 6 open reading frame 97                                  | 14.31288 |          |          |
| chromosome 6 open reading frame 98                                  | 1.530878 | 0.998363 | 0.357375 |
| chromodomain protein, Y-like 2                                      |          | 0.32259  | 1.213503 |
| triple functional domain (PTPRF interacting)                        | 2.48908  | 1.253303 | 3.755219 |
| triple functional domain (PTPRF interacting)                        |          | 1.350017 |          |
| midline 2                                                           |          | 0.392749 |          |
| ELKS/RAB6-interacting/CAST family member 1                          | 0.643136 |          | 3.260563 |
| F-box and leucine-rich repeat protein 14                            | 0.956732 | 0.818461 | 0.432259 |
| similar to olfactory receptor, family 5, subfamily U member         | 4.965479 | 3.681864 |          |
| microtubule associated monooxygenase, calponin and LIM domain conta |          | 3.220408 |          |
| sema domain, seven thrombospondin repeats (type 1 and typ           | 0.125139 | 1.128828 | 0.289021 |
| 5-methyltetrahydrofolate-homocysteine methyltransferase re          | 0.533132 | 0.65647  | 0.352295 |
| microsomal glutathione S-transferase 1                              | 1.10786  | 1.454327 | 0.774568 |
| similar to immunoglobulin-like receptor CHIR-B4 /// similar         | 1.893798 | 0.908033 | 1.289772 |
| ADAM metalloproteinase with thrombospondin type 1 motif,            | 1.056478 |          |          |
| chromosome 9 open reading frame 4                                   | 2.004051 | 0.645636 | 0.976702 |
| phosphodiesterase 3A, cGMP-inhibited                                |          | 1.267382 | 0.458392 |

|                                                             |          |          |          |
|-------------------------------------------------------------|----------|----------|----------|
| similar to olfactory receptor, family 5, subfamily U member | 1.705424 | 5.732099 | 0.812492 |
| semaphorin 7A, GPI membrane anchor (John Milton Hagen)      | 0.80195  | 0.446994 | 0.47161  |
| KIAA0528                                                    | 0.484884 | 0.574153 |          |
| KIAA0528                                                    | 1.26171  | 1.102621 | 0.534167 |
| KIAA0528                                                    |          | 0.584633 | 0.312983 |
| helicase with zinc finger                                   | 0.452865 | 1.517687 | 0.593844 |
| protein arginine methyltransferase 8                        |          | 0.111446 |          |
| protein arginine methyltransferase 8                        | 4.580247 |          | 0.82478  |
| KIAA1219                                                    | 0.046868 | 1.313315 | 0.583644 |
| KIAA1219                                                    | 0.347838 | 1.112414 | 1.177805 |
| KIAA1219                                                    | 0.910377 | 0.795007 | 2.684147 |
| interleukin 7 receptor                                      |          | 0.445284 | 0.846569 |
| PWWP domain containing 2A                                   | 1.204293 | 1.406601 | 0.396321 |
| similar to LOC402959 protein                                | 4.821391 |          | 5.530249 |
| RAN binding protein 10                                      | 3.848035 | 0.79554  | 1.373337 |
| T-cell immunoglobulin and mucin domain containing 4         | 0.383527 | 0.683622 | 0.194419 |
| hypothetical LOC415891                                      | 1.394244 | 0.784061 | 0.405704 |
| leucine rich repeat containing 16A                          | 1.403516 | 0.836937 | 3.090604 |
| RNA binding motif protein 16                                | 1.013841 | 0.709547 | 0.3528   |
| transcription factor B1, mitochondrial                      | 0.860829 | 1.543474 | 0.362083 |
| zinc finger protein 236                                     | 2.168809 | 0.622162 | 0.603327 |
| zinc finger protein 236                                     | 0.654768 | 0.884633 | 0.452667 |
| teashirt family zinc finger 1                               | 1.324865 | 0.876011 | 0.158145 |
| chemokine (C-C motif) receptor 7                            | 0.459021 |          |          |
| chromosome 10 open reading frame 137                        | 0.840197 | 0.838502 | 0.497892 |
| chromosome 10 open reading frame 137                        | 1.042433 | 0.881404 | 0.47179  |
| karyopherin (importin) beta 1                               | 0.968968 | 1.398928 | 2.171163 |
| aminoadipate-semialdehyde dehydrogenase                     | 1.2171   | 0.71123  | 0.399696 |
| similar to hypothetical protein DKFZp434F117.1              |          |          |          |
| fucosidase, alpha-L- 2, plasma                              | 1.236796 | 0.852913 | 0.490867 |
| centrosomal protein 135kDa                                  | 1.348541 | 1.279409 | 0.829116 |
| exocyst complex component 1                                 | 1.848199 | 0.794962 | 0.501233 |
| LSM domain containing 1                                     | 0.461458 | 0.121837 |          |
| human immunodeficiency virus type I enhancer binding prot   | 1.124198 | 0.81826  | 0.374711 |
| steroid 5 alpha-reductase 3 /// transmembrane protein 165   | 0.882366 | 0.796662 | 0.220006 |
| ubiquitin associated protein 2                              | 0.509987 |          | 1.207573 |
| promyelocytic leukemia                                      | 2.875375 | 1.36529  | 1.090287 |
| synaptojanin 2 binding protein                              | 0.872443 | 0.99216  | 0.452523 |
| dual specificity phosphatase 16                             | 3.021404 |          |          |
| AFG3 ATPase family gene 3-like 2 (yeast) /// hypothetical L | 0.551751 | 1.020518 | 1.601047 |

|                                                                                                    |          |          |          |
|----------------------------------------------------------------------------------------------------|----------|----------|----------|
| dehydrodolichyl diphosphate synthase                                                               | 1.309553 | 1.358882 | 0.483907 |
| prenylcysteine oxidase 1                                                                           | 1.337691 | 0.947571 | 0.300009 |
| centrosomal protein 192kDa                                                                         | 1.538862 | 0.711893 | 0.782219 |
| mitogen-activated protein kinase kinase kinase 5                                                   | 1.163844 | 0.529665 | 1.763089 |
| F-box protein 40                                                                                   | 0.093713 |          |          |
| heterogeneous nuclear ribonucleoprotein A3 pseudogene 2                                            | 0.762462 | 1.017658 | 0.456411 |
| chromosome 1 open reading frame 77                                                                 | 0.688405 | 0.738882 | 2.14085  |
| immunoglobulin-like receptor CHIR2D-956 /// similar to immunoglobulin-like receptor CHIR-nischarin | 1.717781 | 0.712843 | 0.32589  |
| nuclear receptor binding protein 2                                                                 |          | 0.596288 | 2.565632 |
| solute carrier family 6 (neurotransmitter transporter, glycine), member 5                          |          |          | 0.091729 |
| solute carrier family 6 (neurotransmitter transporter, glycine), member 5                          |          |          | 0.385706 |
| phospholipase A2, group V                                                                          | 2.426593 | 1.140067 | 0.983316 |
| parvin, beta                                                                                       |          |          | 2.433476 |
| Rho GTPase activating protein 8                                                                    | 2.135645 | 0.848276 | 0.967167 |
| TBC1 (tre-2/USP6, BUB2, cdc16) domain family, member 1                                             |          | 1.087213 | 0.125701 |
| microfibrillar associated protein 5                                                                | 0.832856 | 1.237421 | 2.832558 |
| hypothetical protein LOC772329                                                                     | 1.177483 | 1.295632 | 2.001735 |
| phosphatidylinositol glycan anchor biosynthesis, class T                                           |          |          | 0.093387 |
| similar to mKIAA0746 protein                                                                       | 1.197082 | 0.887228 | 0.299807 |
| cell division cycle 37 homolog (S. cerevisiae)-like 1                                              | 0.889025 | 0.924578 | 0.404642 |
| stabilin 1                                                                                         | 0.973043 |          | 0.592904 |
| splicing factor, arginine/serine-rich 7, 35kDa                                                     | 1.355952 | 0.746915 | 0.302631 |
| hypothetical LOC426599                                                                             | 2.069514 | 1.693956 | 1.013025 |
| vacuolar protein sorting 16 homolog (S. cerevisiae)                                                | 0.809289 | 1.108475 | 2.577333 |
| cell division cycle associated 3                                                                   | 0.566753 | 1.213587 | 0.337014 |
| cell division cycle associated 3                                                                   | 0.708622 | 1.077743 | 0.312273 |
| coiled-coil and C2 domain containing 2A                                                            | 1.537954 | 1.00641  | 0.448768 |
| atrophin 1                                                                                         | 1.383144 | 0.532776 | 0.234316 |
| patatin-like phospholipase domain containing 2                                                     |          | 2.18291  |          |
| membrane bound O-acyltransferase domain containing 5                                               | 0.496784 | 1.763747 | 0.360273 |
| zinc finger, ZZ-type with EF-hand domain 1                                                         |          | 0.19984  |          |
| leiomodrin 3 (fetal) /// similar to leiomodrin 3 (fetal)                                           | 21.17951 |          |          |
| complement component 1, r subcomponent                                                             | 3.17746  | 1.410197 | 1.821374 |
| endoplasmic reticulum aminopeptidase 1                                                             | 0.598975 | 1.64392  | 2.332404 |
| fibrillin 2                                                                                        |          | 4.105241 |          |
| proline-rich coiled-coil 1                                                                         | 1.375754 | 0.705545 | 0.333672 |
| mesoderm induction early response 1, family member 3                                               | 0.016585 |          |          |
| GABA(A) receptors associated protein like 3                                                        | 0.666922 | 0.959144 | 0.652214 |
| transient receptor potential cation channel, subfamily V, member 6                                 |          |          |          |



|                                                                       |          |          |          |
|-----------------------------------------------------------------------|----------|----------|----------|
| erythrocyte membrane protein band 4.1-like 3                          |          |          |          |
| erbb2 interacting protein                                             | 1.015228 | 0.75795  | 2.10178  |
| erbb2 interacting protein                                             | 0.497318 | 1.138526 | 0.620117 |
| amyloid beta (A4) precursor protein-binding, family A, member 2 (X11) | 0.998639 |          | 0.063    |
| splicing factor, arginine/serine-rich 12                              | 0.614325 | 0.871582 | 1.942829 |
| complement component 7                                                |          | 3.953335 | 23.11609 |
| chromosome 6 open reading frame 60                                    | 0.698109 | 0.720602 | 1.165661 |
| discoidin, CUB and LCCL domain containing 1                           | 0.56229  | 0.571224 | 0.158581 |
| ectodermal-neural cortex (with BTB-like domain)                       |          | 1.369641 | 1.924742 |
| establishment of cohesion 1 homolog 1 (S. cerevisiae)                 | 2.048894 | 0.916956 | 1.212367 |
| ankyrin repeat domain 31                                              | 0.820624 |          | 1.183888 |
| dermatan sulfate epimerase                                            | 1.116869 | 1.370361 | 0.386724 |
| collagen, type X, alpha 1(Schmid metaphyseal chondrodysplasia)        |          |          | 7.155311 |
| lon peptidase 2, peroxisomal                                          |          |          |          |
| laminin, alpha 4                                                      | 2.850268 | 1.756321 | 1.970232 |
| CD274 molecule                                                        | 2.323935 | 2.159913 | 1.348117 |
| REV3-like, catalytic subunit of DNA polymerase zeta (yeast            | 1.069683 | 0.80565  | 0.284002 |
| ankyrin repeat domain 29                                              | 0.049164 | 1.422014 |          |
| KIAA1919                                                              |          | 0.95105  | 0.616282 |
| hypothetical LOC418339                                                |          |          | 0.414057 |
| hypothetical LOC427229                                                | 1.490443 | 0.798135 | 0.527637 |
| hypothetical LOC418339                                                | 0.743617 | 0.779833 | 0.064162 |
| ADAMTS-like 1                                                         |          |          | 1.354781 |
| similar to histamine H3 receptor H3S                                  | 1.097268 | 3.065474 | 3.825509 |
| zinc finger protein 521                                               |          | 2.25287  |          |
| hypothetical LOC418360                                                | 0.678147 | 1.585655 | 0.312679 |
| zinc finger, AN1-type domain 5                                        | 0.427293 | 1.336928 | 1.291882 |
| similar to aminopeptidase P                                           | 2.092518 |          |          |
| syntrophin, gamma 1                                                   | 1.535374 | 10.98682 | 0.639783 |
| transcription termination factor, RNA polymerase II                   | 0.652046 | 0.955397 | 0.386511 |
| histidine acid phosphatase domain containing 1                        | 0.318316 | 1.009164 | 0.630485 |
| histidine acid phosphatase domain containing 1                        | 0.716308 | 1.010837 | 1.839469 |
| filamin A interacting protein 1-like                                  | 2.57741  | 0.959002 | 1.919134 |
| sestrin 1                                                             | 1.838307 | 1.16887  | 0.441341 |
| forkhead box O3                                                       | 0.653812 | 0.426605 | 0.573375 |
| ring finger protein 38                                                | 0.867606 | 0.765896 | 1.108285 |
| polycomb group ring finger 3                                          | 0.812655 | 0.987277 | 2.865435 |
| ATG16 autophagy related 16-like 1 (S. cerevisiae)                     | 2.18577  | 0.751789 | 0.393442 |
| ADP-ribosylation factor-like 13B                                      | 1.085039 | 0.575063 | 0.452005 |
| syntaxin 19                                                           |          | 0.080002 |          |

|                                                                           |          |          |          |
|---------------------------------------------------------------------------|----------|----------|----------|
| syntaxin 19                                                               | 28.11374 |          |          |
| Eph receptor A6                                                           | 0.988824 |          | 1.669959 |
| neutral sphingomyelinase (N-SMase) activation associated f                | 1.110564 | 0.868345 | 0.483983 |
| chromosome 1 open reading frame 32                                        | 0.63156  | 1.106081 | 2.64864  |
| chromodomain helicase DNA binding protein 7                               | 1.269377 | 2.712852 |          |
| chromosome 5 open reading frame 4                                         | 0.524574 |          | 0.261486 |
| PDZ domain containing 1                                                   |          | 1.665765 | 0.366173 |
| glucan (1,4-alpha-), branching enzyme 1 (glycogen branchin                | 0.790068 | 0.982625 | 0.901024 |
| ectonucleoside triphosphate diphosphohydrolase 4                          | 1.199131 | 0.986459 | 0.462917 |
| ectonucleoside triphosphate diphosphohydrolase 4                          | 4.189041 | 0.903246 | 0.40931  |
| janus kinase and microtubule interacting protein 1                        |          |          | 3.573425 |
| similar to brefeldin A-inhibited guanine nucleotide-exchange              | 1.434802 | 0.766547 | 0.433585 |
| SH3 domain and tetratricopeptide repeats 1                                | 0.109095 | 0.445746 |          |
| solute carrier organic anion transporter family, member 5A1               | 1.722563 | 0.328384 |          |
| hypothetical protein LOC768383                                            | 0.459533 | 0.849259 | 1.050152 |
| mitogen-activated protein kinase kinase kinase 7                          | 1.804715 | 0.97125  | 0.450633 |
| nuclear receptor coactivator 2                                            | 1.441295 | 0.560649 | 2.601664 |
| X-ray repair complementing defective repair in Chinese ham                | 0.250956 | 2.050443 | 0.525666 |
| X-ray repair complementing defective repair in Chinese ham                | 0.46163  | 1.008042 | 0.780031 |
| regulator of G-protein signalling 12                                      | 0.761021 | 1.689458 | 1.269794 |
| hypothetical LOC420181                                                    | 0.823453 | 0.221808 |          |
| BCL6 co-repressor-like 1                                                  |          | 2.619896 |          |
| BCL6 co-repressor-like 1                                                  |          | 0.455673 |          |
| KIAA0368                                                                  | 1.562468 | 1.262789 | 7.750818 |
| Wolf-Hirschhorn syndrome candidate 1                                      | 0.753414 | 0.709665 | 1.578022 |
| ankyrin repeat domain 6                                                   | 2.669922 |          | 0.035247 |
| Ras-related GTP binding D                                                 | 1.309586 | 0.936746 | 0.736594 |
| chromosome 17 open reading frame 59                                       | 1.01699  | 1.643371 | 1.628866 |
| sorting nexin 16                                                          |          |          | 0.311249 |
| T-cell lymphoma invasion and metastasis 1                                 |          | 0.695575 | 0.600536 |
| WW domain containing E3 ubiquitin protein ligase 1                        | 2.695723 | 1.039411 | 0.73273  |
| filamin A interacting protein 1                                           | 0.443317 | 2.72946  | 1.617307 |
| solute carrier family 7 (cationic amino acid transporter, y+ system), mer |          | 0.369469 | 0.662212 |
| chromosome 21 open reading frame 66                                       | 1.393758 | 0.946762 | 0.413542 |
| asparaginase like 1                                                       |          |          | 30.50434 |
| opioid growth factor receptor-like 1                                      | 0.812434 | 1.007426 | 1.542177 |
| KIAA1429                                                                  | 0.595715 | 0.897336 | 0.587695 |
| transmembrane protein 50B                                                 | 0.810464 | 0.941674 | 0.174204 |
| FAST kinase domains 5                                                     |          | 2.477942 | 0.077077 |
| Alstrom syndrome 1                                                        | 0.920833 | 0.940017 | 0.544387 |

|                                                              |          |          |          |
|--------------------------------------------------------------|----------|----------|----------|
| ring finger protein 19A                                      | 0.478321 | 1.728999 | 0.929085 |
| holocarboxylase synthetase (biotin-(propionyl-Coenzyme A     | 7.389826 | 0.302733 |          |
| Kruppel-like factor 10                                       | 0.764678 | 0.786176 | 2.189841 |
| bromodomain and WD repeat domain containing 1                | 2.025298 | 1.304317 | 1.099576 |
| regulating synaptic membrane exocytosis 2                    |          |          | 47.35082 |
| Alstrom syndrome 1                                           | 0.738645 | 1.070791 | 0.592771 |
| similar to chronic myelogenous leukemia tumor antigen 66 /   | 1.051903 | 2.096232 | 0.390944 |
| phosphorylase kinase, beta                                   | 17.28131 |          |          |
| phosphorylase kinase, beta                                   | 2.034308 | 0.706487 | 0.487006 |
| CUB and Sushi multiple domains 3                             | 2.256824 | 0.874415 |          |
| SAP30-like                                                   | 0.808843 | 0.898454 | 0.741383 |
| PR domain containing 15                                      | 1.329323 | 0.924395 | 0.563169 |
| PR domain containing 15                                      |          | 1.934538 | 0.104737 |
| protein tyrosine phosphatase type IVA, member 3              | 0.749514 | 0.564944 | 0.270583 |
| protein tyrosine phosphatase type IVA, member 3              | 0.639463 | 0.662869 | 0.214452 |
| chromosome X open reading frame 36                           | 1.714008 | 0.884569 | 0.434401 |
| lysine (K)-specific demethylase 6A                           | 0.826498 | 0.86615  | 0.876113 |
| FUN14 domain containing 1                                    | 0.74314  | 1.27334  | 0.452762 |
| EF-hand domain (C-terminal) containing 2                     | 1.040499 | 36.30155 | 0.570117 |
| monoamine oxidase A                                          | 0.968826 | 2.348321 | 1.146005 |
| monoamine oxidase A                                          | 3.072835 |          | 2.137364 |
| BCL6 co-repressor                                            | 1.577462 | 1.036231 | 0.374004 |
| EFR3 homolog A (S. cerevisiae)                               | 1.467562 | 0.82517  | 0.298799 |
| mitogen-activated protein kinase kinase kinase 7 interacting | 1.731785 | 0.982002 | 0.805798 |
| polymerase (DNA directed), alpha 1                           | 0.912479 | 0.655497 | 0.372653 |
| glutamate-cysteine ligase, catalytic subunit                 |          |          | 0.431533 |
| ELOVL family member 5, elongation of long chain fatty ac     | 1.809553 | 1.473425 | 0.277306 |
| phosphate cytidylyltransferase 1, choline, beta              |          |          | 0.997371 |
| microcephaly, primary autosomal recessive 1                  | 1.314652 | 0.826982 | 0.465608 |
| zinc fingers and homeoboxes 1                                |          | 0.161116 |          |
| kinase D-interacting substrate, 220kDa                       | 0.874322 |          |          |
| MAP7 domain containing 2                                     |          |          | 0.075833 |
| MAP7 domain containing 2                                     |          |          | 0.246573 |
| structural maintenance of chromosomes 6                      | 1.134177 |          |          |
| apolipoprotein B (including Ag(x) antigen)                   |          | 2.463934 |          |
| PHD finger protein 12                                        | 1.028905 | 1.098355 | 0.752479 |
| dystrobrevin, beta                                           | 0.664105 | 0.936807 | 1.001451 |
| epoxide hydrolase 2, cytoplasmic                             | 0.388032 | 1.177697 | 4.052452 |
| similar to ADAMTS-like 2                                     |          |          | 23.07459 |
| frizzled homolog 3 (Drosophila)                              | 0.498733 | 0.87847  | 1.083657 |

|                                                                     |          |          |          |
|---------------------------------------------------------------------|----------|----------|----------|
| kinesin family member 13B                                           | 0.547713 | 0.519378 | 1.402846 |
| methionine sulfoxide reductase A                                    | 0.691262 | 1.191697 | 0.449097 |
| XK, Kell blood group complex subunit-related family, meml           | 2.141621 | 0.944655 | 1.573263 |
| PHD finger protein 16                                               | 0.918316 | 0.875039 | 1.229361 |
| cytoplasmic FMR1 interacting protein 1                              | 0.954166 | 0.80917  | 1.388164 |
| hect domain and RLD 2                                               | 0.211527 |          | 0.718031 |
| lysozyme G-like 2                                                   | 5.198005 | 3.637154 | 7.371249 |
| eukaryotic translation initiation factor 5B                         | 0.97421  | 1.13983  | 0.410706 |
| mitogen-activated protein kinase kinase kinase 4                    | 1.551382 | 2.039041 | 0.968235 |
| septin 10                                                           | 1.750314 | 0.681992 | 0.676439 |
| regulator of G-protein signaling 9                                  | 0.692017 | 3.250614 | 2.557593 |
| RAS p21 protein activator 3                                         | 1.317149 | 0.949407 | 0.241681 |
| myosin XVI                                                          | 0.817597 | 0.040545 | 0.819127 |
| myosin XVI                                                          | 0.547994 | 0.464689 |          |
| transmembrane and tetratricopeptide repeat containing 4             | 0.796835 | 1.214753 | 0.308389 |
| dedicator of cytokinesis 9                                          | 4.102089 | 0.894805 | 0.716454 |
| MICAL-like 2                                                        | 3.080575 | 2.871413 |          |
| muscleblind-like 2 (Drosophila)                                     |          | 1.136215 | 2.119984 |
| DAZ interacting protein 1                                           | 3.768897 | 1.053578 | 0.915942 |
| SLIT and NTRK-like family, member 1                                 | 2.514289 |          | 1.698164 |
| RNA binding motif protein 26                                        | 0.507437 | 1.151233 | 0.508767 |
| RNA binding motif protein 26                                        | 1.79684  | 0.89785  | 0.468338 |
| RNA binding motif protein 26                                        | 1.718151 | 0.912192 | 0.552638 |
| chromosome 13 open reading frame 7                                  | 1.609678 | 0.819185 | 0.494481 |
| COMM domain containing 6                                            | 0.248619 | 1.183562 | 0.685967 |
| tet oncogene 1                                                      | 0.962783 | 0.749931 | 0.324165 |
| DIS3 mitotic control homolog (S. cerevisiae)                        | 1.21849  | 1.11566  | 0.782579 |
| olfactomedin 4                                                      |          | 5.708705 |          |
| component of oligomeric golgi complex 3                             | 1.562717 | 0.653097 | 1.166136 |
| zinc finger CCCH-type containing 13                                 | 1.257457 | 0.947517 | 0.493107 |
| leucine-rich repeats and calponin homology (CH) domain containing 1 |          |          |          |
| leucine-rich repeats and calponin homology (CH) domain co           | 0.687347 |          | 0.905026 |
| leucine-rich repeats and calponin homology (CH) domain co           | 0.889453 | 1.103481 | 2.020322 |
| potassium channel regulator                                         | 1.34596  | 0.228563 |          |
| dehydrogenase/reductase (SDR family) member 12                      |          | 23.42153 | 1.452012 |
| doublecortin-like kinase 1                                          | 2.544515 | 0.863591 | 0.058139 |
| PAN3 polyA specific ribonuclease subunit homolog (S. cere           | 0.963242 | 1.40661  | 0.193036 |
| similar to CG10964-PA /// hypothetical LOC427532                    | 0.296509 | 1.032701 | 0.620596 |
| tumor necrosis factor receptor superfamily, member 19               |          |          | 2.025633 |
| thrombospondin, type I, domain containing 4                         | 1.156898 |          |          |

|                                                                    |          |          |          |
|--------------------------------------------------------------------|----------|----------|----------|
| hypothetical protein LOC771527                                     | 1.665941 | 0.689911 | 0.398259 |
| hypothetical LOC418990                                             | 0.186264 |          |          |
| family with sequence similarity 76, member B                       |          | 1.4159   |          |
| dihydrouridine synthase 3-like ( <i>S. cerevisiae</i> )            | 1.225303 | 0.452164 | 2.100358 |
| pannexin 1                                                         | 1.764158 | 1.710728 | 2.202463 |
| RAB30, member RAS oncogene family                                  | 0.77441  | 2.415492 | 0.541009 |
| PCF11, cleavage and polyadenylation factor subunit, homolog        | 2.044409 | 0.774751 | 0.823399 |
| transmembrane and coiled-coil domains 4                            | 0.940288 | 2.292353 |          |
| transmembrane and coiled-coil domains 4                            | 10.72226 |          | 0.123446 |
| asparaginyl-tRNA synthetase 2, mitochondrial (putative)            |          |          | 0.461284 |
| von Willebrand factor                                              | 1.818873 | 1.245266 | 2.662308 |
| growth arrest and DNA-damage-inducible, beta                       | 1.252198 | 1.82627  | 3.391804 |
| cut-like homeobox 1                                                | 1.342458 | 0.716051 | 0.368946 |
| solute carrier organic anion transporter family, member 2B1        | 0.03117  | 0.74827  | 1.143587 |
| KIAA0280                                                           | 0.466438 | 1.066083 | 2.767708 |
| speedy homolog A ( <i>Xenopus laevis</i> )                         | 0.05096  |          |          |
| thioredoxin-like 4A                                                |          | 1.276052 |          |
| TBC1 (tre-2/USP6, BUB2, cdc16) domain family, member 1             | 0.396254 | 2.021899 |          |
| hypothetical LOC426599                                             | 0.4524   | 1.115844 | 3.188509 |
| zinc finger, DHHC-type containing 13                               |          | 0.555839 | 1.628956 |
| deoxyribonuclease I /// similar to deoxyribonuclease I             | 0.171773 |          |          |
| hypothetical LOC426179                                             | 0.868294 | 1.117915 | 0.226433 |
| coactosin-like 1 ( <i>Dictyostelium</i> )                          | 0.681066 | 1.160226 | 0.414238 |
| PRP3 pre-mRNA processing factor 3 homolog ( <i>S. cerevisiae</i> ) | 0.635265 | 3.24079  |          |
| hypothetical LOC426125                                             | 0.628303 | 0.822672 | 0.494741 |
| VAMP (vesicle-associated membrane protein)-associated protein      | 0.591264 | 1.395783 | 0.162554 |
| scribbled homolog ( <i>Drosophila</i> )                            |          |          | 0.053426 |
| phosphoribosyl pyrophosphate synthetase-associated protein         | 0.473851 | 2.292296 |          |
| vitellogenin 2                                                     |          | 0.08644  |          |
| chromosome 9 open reading frame 72                                 | 0.711037 |          |          |
| hypothetical LOC419425                                             | 1.173674 | 2.778845 | 0.412258 |
| netrin G1                                                          | 0.279223 | 3.609023 | 1.476822 |
| scaffold attachment factor B2                                      | 2.762105 | 0.780162 | 1.355692 |
| ATP-binding cassette, sub-family A (ABC1), member 3                | 1.120762 | 1.231047 | 2.077833 |
| similar to HBV pX associated protein 8 large /// remodeling        | 1.136068 | 0.712145 | 0.446355 |
| similar to HBV pX associated protein 8 large /// remodeling        | 0.865795 | 0.912462 | 1.413811 |
| chromosome 19 open reading frame 22                                | 1.237631 | 0.79577  | 6.661934 |
| LIM and senescent cell antigen-like domains 2                      | 0.407649 | 0.482255 | 1.354831 |
| G protein-coupled receptor 17                                      | 0.177394 |          |          |
| catechol-O-methyltransferase                                       | 0.67836  | 0.915566 | 0.26802  |

|                                                                             |          |          |          |
|-----------------------------------------------------------------------------|----------|----------|----------|
| S-adenosylhomocysteine hydrolase                                            | 0.3972   | 1.222478 | 0.340601 |
| slingshot homolog 2 (Drosophila)                                            | 0.743101 |          | 1.1502   |
| similar to Family with sequence similarity 35, member A                     | 2.342474 | 0.815233 | 0.453787 |
| DENN/MADD domain containing 2C                                              | 0.911147 | 1.514666 | 2.226945 |
| WD repeat domain 33                                                         | 0.806566 | 0.783796 | 0.34477  |
| calcium/calmodulin-dependent protein kinase IV                              | 0.099767 |          |          |
| DiGeorge syndrome critical region gene 8                                    | 1.258014 | 1.012632 | 0.461448 |
| dedicator of cytokinesis 2                                                  | 0.825559 | 1.148011 | 1.364336 |
| N-acetylglucosamine-1-phosphodiester alpha-N-acetylglucosaminidase          |          | 0.99262  | 1.12236  |
| 6-phosphofructo-2-kinase/fructose-2,6-biphosphatase 4                       | 0.664633 | 1.498141 | 2.94574  |
| kinesin family member 14                                                    | 0.975883 | 0.827199 | 0.536883 |
| kelch-like 6 (Drosophila)                                                   |          | 0.346899 |          |
| kelch-like 6 (Drosophila)                                                   | 0.949191 | 0.712911 | 0.29111  |
| DnaJ (Hsp40) homolog, subfamily A, member 2                                 | 1.629151 | 0.290136 |          |
| sema domain, transmembrane domain (TM), and cytoplasmic domain, (semaphorin |          |          | 0.331093 |
| CCR4-NOT transcription complex, subunit 1                                   | 0.832788 | 1.168118 | 0.309695 |
| YEATS domain containing 2                                                   |          | 0.531454 |          |
| claspin homolog (Xenopus laevis)                                            | 0.035405 | 0.966871 | 1.521945 |
| ORM1-like 1 (S. cerevisiae) /// solute carrier family 40 (iron              | 0.709238 | 2.807224 | 0.875352 |
| avidin related protein 2 /// hypothetical LOC427416                         | 0.625272 | 1.334802 | 5.613064 |
| SIL1 homolog, endoplasmic reticulum chaperone (S. cerevis                   | 1.287035 | 1.155876 | 2.028104 |
| solute carrier family 2 (facilitated glucose/fructose transporter), member  |          | 1.881368 | 0.987274 |
| glutaredoxin 2                                                              | 0.77009  | 0.832629 | 0.291003 |
| splicing factor, arginine/serine-rich 8 (suppressor-of-white-a              | 1.016009 | 0.67257  | 0.218809 |
| splicing factor, arginine/serine-rich 8 (suppressor-of-white-a              | 1.081212 | 0.33959  | 0.233419 |
| collagen, type V, alpha 2                                                   | 0.73589  | 1.155726 | 0.476643 |
| collagen, type III, alpha 1                                                 | 0.936449 | 1.398521 | 0.409584 |
| GULP, engulfment adaptor PTB domain containing 1                            | 1.791021 | 1.229053 | 2.498    |
| RAB guanine nucleotide exchange factor (GEF) 1                              | 1.382625 | 0.576646 | 0.663062 |
| similar to LOC495387 protein                                                | 2.455431 |          | 0.393332 |
| hypothetical LOC419703 /// salt-inducible kinase 2                          | 1.651806 | 0.487836 |          |
| piwi-like 1 (Drosophila)                                                    |          | 1.888635 | 4.824338 |
| ubiquitination factor E4B (UFD2 homolog, yeast)                             | 1.415959 | 0.723984 | 0.881001 |
| neurofilament, light polypeptide 68kDa                                      | 0.814142 | 0.819664 | 0.150958 |
| strawberry notch homolog 2 (Drosophila)                                     | 0.585999 | 2.941242 | 1.180638 |
| strawberry notch homolog 2 (Drosophila)                                     | 0.865324 | 1.792471 | 1.673844 |
| strawberry notch homolog 2 (Drosophila)                                     |          |          |          |
| similar to KIAA1990 protein                                                 | 0.559797 | 1.326963 | 2.260733 |
| hypothetical LOC415345                                                      | 2.62855  | 0.681323 | 1.242329 |
| casein kinase 1, delta                                                      | 0.694909 | 0.988909 | 0.995319 |

|                                                                           |          |          |          |
|---------------------------------------------------------------------------|----------|----------|----------|
| aquaporin 5                                                               | 0.448124 | 2.130307 |          |
| A kinase (PRKA) anchor protein 7 /// hypothetical protein LOC768867       |          |          |          |
| cysteinyl leukotriene receptor 1                                          |          |          | 0.437881 |
| neighbor of BRCA1 gene 1                                                  |          |          |          |
| small nuclear ribonucleoprotein polypeptide C                             | 0.56964  | 1.377206 | 0.464539 |
| fatty acid 2-hydroxylase                                                  | 0.981841 | 4.181992 |          |
| ubiquitin specific peptidase 52                                           |          |          |          |
| mediator complex subunit 23                                               | 1.768206 | 0.992693 | 0.695213 |
| microtubule-associated protein 2                                          | 3.096533 |          |          |
| Rho family GTPase 2                                                       | 0.824959 | 0.363383 |          |
| serine/threonine kinase 10                                                |          | 4.214102 | 1.106984 |
| vesicle amine transport protein 1 homolog (T. californica)                | 0.42423  | 1.477138 | 0.600002 |
| peroxisomal biogenesis factor 14                                          | 0.204878 | 0.65043  | 1.100499 |
| similar to KIAA1629 protein                                               | 0.397334 | 1.317849 |          |
| zinc finger protein 532                                                   |          |          | 12.72172 |
| alveolar soft part sarcoma chromosome region, candidate 1                 | 0.881613 | 1.098714 | 0.363179 |
| C-type lectin domain family 2, member B /// C-type lectin domain famil    |          | 0.308804 |          |
| C-type lectin domain family 2, member B /// C-type lectin domain famil    |          | 0.380999 |          |
| hypothetical LOC426235 /// hypothetical protein LOC77200                  | 3.222875 | 1.16316  | 0.779085 |
| hypothetical LOC426235                                                    | 4.152623 |          |          |
| DEAH (Asp-Glu-Ala-His) box polypeptide 37                                 | 1.079295 | 1.292535 | 2.098144 |
| serpin peptidase inhibitor, clade F (alpha-2 antiplasmin, pigment epithel |          | 1.546492 | 0.182692 |
| potassium channel, subfamily K, member 15                                 |          |          | 0.247248 |
| carbonic anhydrase X                                                      | 0.934185 | 0.746358 | 0.382397 |
| WD repeat domain 7                                                        | 0.23855  |          |          |
| solute carrier family 19, member 3                                        | 4.045511 |          |          |
| myosin IE                                                                 |          |          | 2.620047 |
| DEAD (Asp-Glu-Ala-Asp) box polypeptide 41                                 | 0.828303 | 1.240058 | 0.371304 |
| solute carrier family 37 (glycerol-3-phosphate transporter), member 2     |          | 0.490476 | 0.552327 |
| exosome component 10                                                      | 1.124612 | 1.175885 | 3.055175 |
| nuclear receptor co-repressor 2                                           |          | 0.754876 | 0.426944 |
| nuclear receptor co-repressor 2                                           | 14.05246 |          |          |
| tripartite motif-containing 25                                            | 2.040152 |          |          |
| tripartite motif-containing 25                                            | 3.726135 | 2.202701 | 0.393964 |
| tripartite motif-containing 25                                            | 1.209337 |          | 0.386306 |
| BCL2-antagonist/killer 1                                                  | 1.135433 | 1.459798 | 1.704098 |
| nuclear transcription factor Y, gamma                                     |          | 0.529267 | 0.788667 |
| similar to zinc finger RNA binding protein                                | 11.65475 | 1.125213 | 0.073618 |
| zinc finger RNA binding protein                                           | 3.005828 | 2.498426 | 0.302883 |
| similar to zinc finger RNA binding protein                                | 64.22788 | 2.938374 | 0.012159 |

|                                                                          |          |          |          |
|--------------------------------------------------------------------------|----------|----------|----------|
| protocadherin 24                                                         | 0.956678 |          | 2.807768 |
| similar to HBxAg transactivated protein 2                                | 1.280133 | 1.320289 | 0.264073 |
| similar to HBxAg transactivated protein 2 /// similar to HBxAg transacti |          | 1.28683  | 0.468472 |
| CREB regulated transcription coactivator 1                               | 2.910193 | 1.427861 | 2.266803 |
| CREB regulated transcription coactivator 1                               |          |          | 22.41623 |
| CREB regulated transcription coactivator 1                               | 1.310297 | 1.11887  | 6.223299 |
| leucine-zipper-like transcription regulator 1                            | 2.288777 | 0.666724 | 0.714343 |
| ER lipid raft associated 1                                               | 1.035148 | 1.243195 | 0.938707 |
| ATX1 antioxidant protein 1 homolog (yeast)                               | 0.38563  | 0.938259 | 0.600397 |
| K(lysine) acetyltransferase 2A                                           | 2.877101 | 1.26997  | 2.519675 |
| DnaJ (Hsp40) homolog, subfamily C, member 21                             |          |          | 3.054953 |
| strawberry notch homolog 1 (Drosophila)                                  | 1.811459 | 1.492247 | 0.483741 |
| DEAH (Asp-Glu-Ala-Asp/His) box polypeptide 57 /// simila                 | 0.483952 | 1.059081 | 1.211365 |
| importin 9                                                               | 1.528099 | 1.363156 | 0.355243 |
| similar to pepsinogen C                                                  | 0.531691 | 0.907055 | 0.463452 |
| minichromosome maintenance complex component 10                          | 1.166104 | 1.589401 | 1.214784 |
| lysyl oxidase-like 2                                                     | 0.706533 | 0.867748 | 0.543794 |
| kelch-like 5 (Drosophila)                                                |          |          | 0.079996 |
| aldehyde dehydrogenase 9 family, member A1                               | 2.083396 | 1.368846 | 0.881964 |
| microtubule associated serine/threonine kinase 3                         | 3.174249 | 1.061686 | 3.081102 |
| platelet/endothelial cell adhesion molecule (CD31 antigen)               | 0.951504 | 1.016506 | 0.312972 |
| platelet/endothelial cell adhesion molecule /// platelet/endoth          | 2.269534 | 0.879135 | 0.674462 |
| arrestin domain containing 2                                             |          |          | 2.648997 |
| solute carrier family 12 (potassium/chloride transporters), m            | 1.249344 | 0.837139 | 0.204182 |
| solute carrier family 12 (potassium/chloride transporters), m            | 0.898615 | 1.104192 | 0.301534 |
| solute carrier family 1 (glial high affinity glutamate transport         | 1.148581 | 0.941316 |          |
| transformation/transcription domain-associated protein                   | 0.989064 | 0.902508 | 0.703738 |
| RPGRIP1-like                                                             | 2.199993 | 0.948963 | 0.857593 |
| transcription termination factor, RNA polymerase I                       | 0.620192 | 1.405735 | 0.472363 |
| MYST histone acetyltransferase (monocytic leukemia) 3                    | 1.568154 | 0.978983 | 0.556514 |
| retinoblastoma-like 2 (p130)                                             | 1.163967 | 1.333474 | 0.250831 |
| phosphatidylinositol transfer protein, cytoplasmic 1                     | 0.717693 | 0.679026 | 0.836957 |
| lysine (K)-specific demethylase 5B                                       |          |          | 0.368447 |
| ring finger protein 145                                                  | 1.169178 | 1.097415 | 0.446723 |
| microtubule-actin crosslinking factor 1                                  | 1.526637 | 0.35056  |          |
| helicase with zinc finger                                                | 2.15803  | 0.87148  | 0.453628 |
| SRY (sex determining region Y)-box 30                                    |          |          |          |
| F-box protein 42                                                         | 0.483755 |          |          |
| TOX high mobility group box family member 3                              | 3.737701 | 0.710058 | 1.187544 |
| melanoregulin                                                            |          | 2.344863 |          |



|                                                                                            |          |          |          |
|--------------------------------------------------------------------------------------------|----------|----------|----------|
| BCL2/adenovirus E1B 19kDa interacting protein 2                                            | 1.667193 | 0.808211 | 0.497466 |
| OTU domain containing 7A                                                                   | 1.476669 | 1.102135 | 2.154037 |
| keratin 15                                                                                 | 0.524797 | 1.413714 | 0.462878 |
| tRNA isopentenyltransferase 1                                                              | 1.07282  | 0.779693 | 0.542432 |
| intraflagellar transport 81 homolog (Chlamydomonas)                                        | 0.523369 | 5.413198 |          |
| purinergic receptor P2X, ligand-gated ion channel, 7                                       | 7.019653 | 0.880146 | 1.557137 |
| serine incorporator 3                                                                      | 1.212774 | 1.328492 | 0.257288 |
| zinc finger protein 423                                                                    |          |          | 2.310378 |
| xenotropic and polytropic retrovirus receptor                                              | 0.591733 | 1.18491  | 0.900499 |
| PR domain containing 12                                                                    |          |          |          |
| oculocerebrorenal syndrome of Lowe                                                         | 0.793065 | 0.536244 | 0.799918 |
| immunoglobulin-like receptor CHIR-B3 /// similar to immun                                  | 1.934899 |          | 0.705281 |
| myopalladin                                                                                | 1.418522 |          | 1.219425 |
| heterogeneous nuclear ribonucleoprotein H3 (2H9)                                           | 0.976267 | 0.963338 | 0.322106 |
| tight junction protein 1 (zona occludens 1)                                                | 1.177297 | 1.225622 | 0.499557 |
| coiled-coil domain containing 46                                                           | 6.480273 |          |          |
| twinfilin, actin-binding protein, homolog 2 (Drosophila) /// V                             | 0.784195 | 0.995184 | 0.926024 |
| NIMA (never in mitosis gene a)- related kinase 8                                           | 0.404657 |          |          |
| MAD1 mitotic arrest deficient-like 1 (yeast)                                               |          | 0.941353 | 0.287938 |
| RUN and FYVE domain containing 2                                                           | 0.61285  | 0.790821 | 0.048147 |
| RUN and FYVE domain containing 2                                                           | 0.496596 | 1.402756 | 0.036056 |
| lysophospholipase II pseudogene 1                                                          |          | 0.512923 | 0.691357 |
| jumonji domain containing 2B                                                               | 1.446348 | 0.742905 | 0.736567 |
| family with sequence similarity 81, member A                                               |          | 0.761138 | 2.13168  |
| F-box and leucine-rich repeat protein 10                                                   | 1.364472 | 0.806641 | 0.437598 |
| F-box and leucine-rich repeat protein 10                                                   | 1.40722  | 0.755803 | 0.239499 |
| cell division cycle and apoptosis regulator 1                                              | 1.361873 | 0.829767 | 0.442656 |
| glucosidase, alpha; acid (Pompe disease, glycogen storage di                               | 1.042158 | 0.991136 | 2.163836 |
| family with sequence similarity 20, member A                                               |          | 0.690598 | 2.913172 |
| UDP glucuronosyltransferase 1 family, polypeptide A1 /// U                                 | 1.531946 | 2.431532 | 2.853778 |
| similar to 26S proteasome non-ATPase regulatory subunit 13 (26S proteasome regulatory subu |          |          |          |
| hexokinase domain containing 1                                                             | 0.743858 | 1.384666 | 2.081896 |
| vacuolar protein sorting 13 homolog D (S. cerevisiae)                                      | 0.930839 | 0.787952 | 0.497717 |
| similar to LOC495387 protein                                                               | 3.103987 |          |          |
| cingulin-like 1                                                                            | 40.47752 |          |          |
| ATP-binding cassette, sub-family A (ABC1), member 5                                        | 0.779599 | 0.409309 |          |
| chromosome 7 open reading frame 27                                                         | 1.095623 | 0.737469 | 0.638318 |
| WD repeat domain 66                                                                        | 0.429793 | 0.44163  | 1.674221 |
| similar to MAP kinase kinase 6b                                                            | 0.382233 | 0.828844 | 0.533587 |
| exportin 1 (CRM1 homolog, yeast)                                                           | 1.491333 | 0.955325 | 0.432754 |

|                                                                                     |          |          |          |
|-------------------------------------------------------------------------------------|----------|----------|----------|
| DnaJ (Hsp40) homolog, subfamily B, member 12                                        | 1.266818 | 0.93862  | 1.191164 |
| sperm antigen with calponin homology and coiled-coil domain                         | 0.965868 | 1.060505 | 2.237453 |
| solute carrier family 39 (metal ion transporter), member 11                         | 0.095992 | 1.746634 | 1.422363 |
| Similar to olfactory receptor MOR172-4                                              |          | 7.037157 |          |
| SHC SH2-domain binding protein 1                                                    | 0.528294 | 1.165696 | 0.405451 |
| sema domain, immunoglobulin domain (Ig), short basic domain                         | 0.460989 |          |          |
| sema domain, immunoglobulin domain (Ig), short basic domain                         | 1.085706 | 3.92701  |          |
| ephrin-B1                                                                           | 0.994112 | 1.146385 | 0.14828  |
| kinetochore associated 1                                                            | 1.123528 | 0.830785 | 0.855886 |
| serine/threonine kinase 38                                                          | 0.938911 | 2.676246 | 0.6701   |
| protein tyrosine phosphatase, receptor type, f polypeptide (P <sup>r</sup> )        | 0.991779 | 0.830969 | 0.415012 |
| selenophosphate synthetase 1                                                        |          | 1.340534 |          |
| leucine rich repeat containing 8 family, member A                                   |          |          |          |
| FancA associated protein of 100 kDa /// nuclear protein local                       | 1.728635 | 0.689342 |          |
| RNA binding motif protein 5                                                         | 1.77563  | 0.704587 | 0.369261 |
| solute carrier family 45, member 1                                                  | 0.83725  | 0.707666 | 1.616656 |
| hypothetical LOC423006                                                              |          | 0.537776 | 0.425801 |
| ataxin 2                                                                            | 1.87584  | 0.56586  | 0.545965 |
| ataxin 2                                                                            | 0.781381 | 0.840196 | 0.458007 |
| ataxin 2                                                                            |          | 0.921375 | 0.456183 |
| RNA binding motif protein 5                                                         | 1.129409 | 0.780696 | 0.484258 |
| ring finger protein 216                                                             | 4.557001 |          |          |
| patched domain containing 2                                                         | 0.560662 | 0.979696 | 0.526276 |
| ADP-ribosylation factor guanine nucleotide-exchange factor                          | 0.628503 | 0.81815  |          |
| ADP-ribosylation factor guanine nucleotide-exchange factor                          | 2.071493 |          | 0.710236 |
| zinc finger, DHHC-type containing 12                                                | 1.068857 | 0.82713  | 0.393051 |
| A kinase (PRKA) anchor protein 10                                                   | 0.734665 | 1.511317 | 0.448407 |
| coiled-coil domain containing 21                                                    |          |          |          |
| solute carrier family 7 (cationic amino acid transporter, y <sup>+</sup> symporter) | 1.27941  | 2.638824 |          |
| obscurin, cytoskeletal calmodulin and titin-interacting RhoGAP                      | 0.51961  | 1.082101 | 2.079206 |
| immunoglobulin-like receptor CHIR-AB3 /// similar to immunoglobulin-like receptor   | 2.294402 |          | 4.091546 |
| zinc finger, NFX1-type containing 1                                                 | 2.314154 | 2.536104 | 4.645526 |
| RAS, dexamethasone-induced 1                                                        | 2.156833 | 1.6907   | 2.525768 |
| solute carrier family 10 (sodium/bile acid cotransporter family)                    | 2.142312 |          |          |
| solute carrier family 6 (neurotransmitter transporter, GABA)                        | 0.531315 | 3.640933 | 0.589774 |
| solute carrier family 6 (neurotransmitter transporter, GABA)                        | 1.4956   | 0.549302 | 2.299498 |
| glycine receptor, alpha 4                                                           | 0.507055 | 1.240429 | 0.375153 |
| vestigial like 4 (Drosophila)                                                       | 4.151865 |          |          |
| chromosome 3 open reading frame 31                                                  | 1.459293 | 1.191536 | 0.486168 |
| KIAA0355                                                                            | 1.446825 | 1.022935 | 0.353583 |

|                                                                                         |          |          |          |
|-----------------------------------------------------------------------------------------|----------|----------|----------|
| TIMP metalloproteinase inhibitor 4                                                      |          | 0.872609 |          |
| discs, large homolog 5 (Drosophila)                                                     | 1.379734 | 1.598745 | 1.111987 |
| similar to Cat eye syndrome chromosome region, candidate 5                              | 2.293934 | 0.859164 | 1.219068 |
| dedicator of cytokinesis 10                                                             | 0.374599 | 0.776845 | 0.558066 |
| deformed epidermal autoregulatory factor 1 (Drosophila)                                 | 1.382059 | 0.75828  | 0.407183 |
| NIPA-like domain containing 3                                                           |          | 1.209885 | 0.0696   |
| centrosomal protein 152kDa                                                              | 1.094384 | 1.018369 | 0.346387 |
| translocated promoter region (to activated MET oncogene)                                | 0.903961 | 0.87349  | 0.496511 |
| carboxylesterase 1 (monocyte/macrophage serine esterase 1)                              | 1.691767 | 2.748619 | 3.72252  |
| hypothetical LOC416899                                                                  | 1.207543 | 1.224158 | 2.012114 |
| carbohydrate (chondroitin 4) sulfotransferase 12                                        | 0.489336 | 0.854926 | 1.009672 |
| carbohydrate (chondroitin 4) sulfotransferase 12                                        | 0.603926 | 0.773853 | 0.181249 |
| secretogranin II (chromogranin C)                                                       | 1.486373 | 0.822186 | 2.080172 |
| collagen, type XI, alpha 1                                                              | 1.071807 | 0.788681 | 1.948672 |
| CD72 molecule                                                                           |          | 0.722647 | 1.368364 |
| glutathione S-transferase theta 1                                                       | 0.644786 | 0.896137 | 0.184641 |
| ubiquitin specific peptidase 54                                                         | 4.420108 | 1.360803 | 0.435195 |
| CDC14 cell division cycle 14 homolog A (S. cerevisiae)                                  | 0.346209 | 1.006494 | 0.744334 |
| CDC14 cell division cycle 14 homolog A (S. cerevisiae)                                  | 1.537063 | 0.40878  |          |
| G protein-coupled receptor 88                                                           | 0.311174 |          | 2.051942 |
| acid phosphatase-like 2                                                                 | 1.388741 | 0.643741 | 0.45848  |
| BRCA1 interacting protein C-terminal helicase 1                                         |          | 0.403952 | 0.684498 |
| DCP1 decapping enzyme homolog A (S. cerevisiae)                                         | 0.710791 | 0.950439 | 0.586695 |
| zinc finger protein 232                                                                 | 0.762222 | 0.875492 | 0.631722 |
| polymerase (RNA) I polypeptide E, 53kDa                                                 | 0.509084 | 0.928932 | 2.146062 |
| amylo-1, 6-glucosidase, 4-alpha-glucanotransferase (glycogen)                           | 1.082581 | 0.686091 | 0.717579 |
| PDZ and LIM domain 1 (elfin)                                                            | 1.153564 | 1.240442 | 1.437924 |
| O-linked N-acetylglucosamine (GlcNAc) transferase (UDP-N-acetylglucosamine 4-epimerase) | 2.268137 | 0.724639 | 0.655816 |
| FRAS1 related extracellular matrix 1                                                    | 0.998789 | 0.544462 | 2.566707 |
| chromosome 3 open reading frame 63                                                      | 1.369163 | 0.74474  | 0.646426 |
| TAF1 RNA polymerase II, TATA box binding protein (TBP)                                  | 0.971606 | 0.768591 | 0.583269 |
| TAF1 RNA polymerase II, TATA box binding protein (TBP)                                  | 1.829472 | 0.694968 | 0.615995 |
| similar to Malonyl-CoA decarboxylase, mitochondrial precursor (MCD)                     |          | 2.747203 |          |
| similar to Malonyl-CoA decarboxylase, mitochondrial precursor                           | 1.229979 | 1.337241 | 0.666085 |
| myelin protein zero-like 1                                                              | 1.078372 | 2.237754 | 1.614962 |
| kinesin family member 9                                                                 | 8.711238 |          |          |
| kinesin family member 9                                                                 | 30.80197 |          | 3.677739 |
| Treacher Collins-Franceschetti syndrome 1                                               | 0.63313  | 0.964576 | 1.83454  |
| hypothetical LOC424832                                                                  | 0.719068 | 1.051102 | 0.070104 |
| hypothetical LOC424832                                                                  | 1.633122 | 0.506088 | 0.171958 |

|                                                                                       |          |          |          |
|---------------------------------------------------------------------------------------|----------|----------|----------|
| similar to KIAA0703 protein                                                           | 0.316354 |          |          |
| growth factor, augments liver regeneration (ERV1 homolog)                             | 0.77061  | 0.644288 | 0.568423 |
| collagen, type XIII, alpha 1                                                          | 0.946717 |          | 6.966872 |
| collagen, type XIII, alpha 1                                                          | 13.18968 |          |          |
| Rho GTPase activating protein 29                                                      | 2.510908 | 0.911763 | 0.709019 |
| kinase suppressor of ras 1                                                            | 1.999819 | 2.130266 | 5.110702 |
| kinase suppressor of ras 1                                                            | 1.22479  | 2.335093 | 6.882602 |
| kinase suppressor of ras 1                                                            |          | 1.654535 | 1.972192 |
| zinc finger, DHHC-type containing 7                                                   | 1.070065 | 0.872786 | 0.491597 |
| colony stimulating factor 1 receptor, formerly McDonough feline sarcoma viral (v-fms) |          |          | 0.062978 |
| solute carrier family 7 (cationic amino acid transporter, y+ system)                  | 5.050246 | 1.397771 | 0.73221  |
| switch-associated protein 70                                                          |          |          |          |
| hypothetical LOC416916                                                                | 0.977687 | 0.658022 | 0.277857 |
| ADP-ribosylation factor GTPase activating protein 1                                   | 0.716275 | 0.649354 | 0.273721 |
| zinc finger protein 143                                                               | 1.503331 | 1.190936 | 0.480584 |
| discs, large homolog 3 (neuroendocrine-dlg, Drosophila)                               | 0.898509 | 1.526402 | 0.431066 |
| transient receptor potential cation channel, subfamily M, member 1                    | 1.352135 | 0.930989 | 0.400877 |
| KIAA0664                                                                              | 0.515213 | 1.41369  | 2.12213  |
| TBC1 domain family, member 9B (with GRAM domain)                                      | 1.411202 | 1.039906 | 0.062421 |
| Ets2 repressor factor                                                                 | 1.670693 | 0.981644 |          |
| leucine-rich repeats and calponin homology (CH) domain containing 1                   | 1.178356 | 0.644905 | 4.133235 |
| leucine-rich repeats and calponin homology (CH) domain containing 1                   | 1.387634 | 0.408623 | 0.55743  |
| leucine-rich repeats and calponin homology (CH) domain containing 1                   | 0.439014 | 0.836166 | 4.167286 |
| leucine-rich repeats and calponin homology (CH) domain containing 1                   | 0.878165 | 0.286686 | 0.815398 |
| leucine-rich repeats and calponin homology (CH) domain containing 2                   |          | 0.255363 |          |
| WSC domain containing 1                                                               | 0.404992 | 1.246007 | 0.259514 |
| signal peptide, CUB domain, EGF-like 2                                                |          |          |          |
| signal peptide, CUB domain, EGF-like 2                                                |          | 3.151799 |          |
| AN1, ubiquitin-like, homolog (Xenopus laevis)                                         | 1.685441 | 0.852463 | 0.534831 |
| sequestosome 1                                                                        | 0.832817 | 0.655242 | 2.059346 |
| sequestosome 1                                                                        | 1.990658 | 2.550945 |          |
| myosin ID                                                                             | 1.076562 | 0.998236 | 0.782567 |
| suppression of tumorigenicity 5                                                       | 2.020142 | 0.886072 | 0.405164 |
| mastermind-like 1 (Drosophila)                                                        | 1.288118 | 1.490884 | 0.31392  |
| solute carrier family 5 (sodium/glucose cotransporter), member 1                      | 0.769317 | 0.861746 | 3.158948 |
| ecotropic viral integration site 5                                                    | 1.676276 | 0.552476 | 1.069981 |
| ecotropic viral integration site 5                                                    | 1.686539 |          | 0.294817 |
| similar to tumor endothelial marker 8                                                 | 1.594926 | 4.531445 | 4.533059 |
| phosphatidylserine synthase 2                                                         | 0.280775 | 1.665454 | 0.264696 |
| similar to RUFY1 /// RUN and FYVE domain containing 1                                 | 0.976785 | 1.099054 | 0.76991  |

|                                                               |          |          |          |
|---------------------------------------------------------------|----------|----------|----------|
| solute carrier family 13 (sodium-dependent citrate transporte | 14.42176 | 5.702733 |          |
| ADAM metallopeptidase with thrombospondin type 1 motif,       | 0.491477 |          |          |
| PRP6 pre-mRNA processing factor 6 homolog (S. cerevisiae      | 0.609364 | 0.896475 | 0.084129 |
| similar to dedicator of cytokinesis 11                        | 0.934128 | 0.588145 | 0.133827 |
| abhydrolase domain containing 7                               | 0.628816 | 0.907131 | 0.02191  |
| abhydrolase domain containing 7                               | 0.558886 | 0.63198  | 0.028842 |
| retinoblastoma binding protein 6                              | 0.750652 | 0.868251 | 1.93736  |
| zinc finger and BTB domain containing 46                      | 1.506403 | 0.650917 | 0.400263 |
| trinucleotide repeat containing 6A                            | 2.170084 | 1.026445 | 1.336412 |
| pleckstrin homology domain containing, family A member 7      |          | 3.422979 |          |
| zinc finger protein 644                                       | 0.877047 | 1.091881 | 0.406237 |
| similar to Aryl Hydrocarbon Receptor 2                        |          |          | 3.253082 |
| phosphoinositide-3-kinase, class 2, alpha polypeptide         | 0.846768 | 1.029795 | 0.634035 |
| transmembrane protein 32                                      | 0.978134 | 2.025438 | 1.261793 |
| myosin light chain kinase 3                                   |          |          |          |
| LIM domain and actin binding 1                                | 1.464544 | 1.779081 | 1.066805 |
| leucine rich repeat containing 8 family, member C             | 1.184067 | 1.136727 | 2.444317 |
| solute carrier family 9 (sodium/hydrogen exchanger), member 6 |          |          | 0.410167 |
| thioredoxin reductase 3                                       | 0.926677 | 1.069709 | 0.759546 |
| FAT tumor suppressor homolog 2 (Drosophila)                   | 0.338579 |          |          |
| kelch-like 12 (Drosophila)                                    | 0.440318 | 0.510105 | 0.92047  |
| RAS protein activator like 2                                  |          | 1.419707 |          |
| RAS protein activator like 2                                  | 0.801862 | 0.17792  | 1.393308 |
| ATP-binding cassette, sub-family A (ABC1), member 8           | 0.257912 | 1.009355 |          |
| ATP-binding cassette, sub-family A (ABC1), member 5           | 0.451004 | 0.698234 | 12.73428 |
| endoplasmic reticulum metallopeptidase 1                      | 1.023584 | 0.421213 | 1.538053 |
| myosin light chain kinase 3                                   | 0.862084 | 0.304355 | 0.767186 |
| inositol polyphosphate phosphatase-like 1                     |          | 1.210354 | 2.247599 |
| WD repeat domain 41                                           | 0.489757 | 1.099307 | 0.872541 |
| coiled-coil domain containing 109A                            | 3.18772  | 0.954472 | 0.269615 |
| hypothetical LOC428824                                        | 1.089503 | 0.432784 | 1.219423 |
| cell cycle progression 1                                      | 1.205061 | 1.321346 | 0.381598 |
| wingless-type MMTV integration site family, member 11b        |          |          | 0.511376 |
| leucine zipper protein 2                                      |          |          |          |
| chick olfactory receptor 4                                    |          |          | 1.420057 |
| RAB27A, member RAS oncogene family                            | 0.920292 | 0.858047 | 0.072814 |
| arylsulfatase B                                               | 0.677596 | 1.593679 | 2.003995 |
| astrotactin 1                                                 | 0.269413 |          |          |
| pleckstrin homology domain containing, family F (with FYV     | 0.069237 |          |          |
| zinc finger, CCHC domain containing 8                         | 2.292345 | 0.744777 | 0.468926 |

|                                                                    |          |          |          |
|--------------------------------------------------------------------|----------|----------|----------|
| coiled-coil domain containing 137                                  | 1.299937 | 1.304429 | 1.251459 |
| betaine-homocysteine methyltransferase                             | 0.923747 | 0.760119 | 2.570336 |
| RNA binding motif protein 22                                       | 0.961112 | 0.822164 | 1.011315 |
| tectonic family member 1                                           | 1.219887 | 0.689208 | 0.708984 |
| trinucleotide repeat containing 18                                 | 0.480007 | 0.488276 |          |
| KIAA1370                                                           | 1.020662 | 0.854608 | 0.286663 |
| KIAA1370                                                           | 1.257748 | 0.724402 | 0.352508 |
| phytanoyl-CoA dioxygenase domain containing 1                      | 0.375202 | 1.460145 |          |
| N-deacetylase/N-sulfotransferase (heparan glucosaminyl) 1          |          | 0.501025 | 0.061649 |
| nuclear protein localization 4 homolog (S. cerevisiae)             |          | 0.840418 | 0.349402 |
| trinucleotide repeat containing 18                                 | 0.352936 | 0.574069 |          |
| 5,10-methylenetetrahydrofolate reductase (NADPH)                   | 0.742386 | 1.63655  | 0.416124 |
| 5,10-methylenetetrahydrofolate reductase (NADPH)                   |          |          | 0.19491  |
| hypothetical LOC428696                                             | 1.197177 | 0.764465 | 1.081467 |
| similar to cHz-cadherin                                            | 0.146191 |          |          |
| similar to cHz-cadherin                                            |          | 3.103778 |          |
| similar to myosin 5c; myosin Vc /// myosin VC                      | 1.511029 | 1.017232 |          |
| nicotinamide nucleotide adenyltransferase 2                        | 0.580448 |          | 2.71746  |
| DEAD (Asp-Glu-Ala-Asp) box polypeptide 25                          | 1.093023 | 0.497084 | 1.107581 |
| F-box protein 2                                                    |          | 1.041567 | 0.058741 |
| transient receptor potential cation channel, subfamily V, member 3 |          |          |          |
| similar to LOC398026 protein                                       | 2.662359 |          |          |
| aspartoacylase (Canavan disease)                                   |          |          | 1.861193 |
| glycerophosphodiester phosphodiesterase domain containing          | 0.436723 |          |          |
| isovaleryl Coenzyme A dehydrogenase                                | 1.152407 | 1.30928  | 0.752709 |
| notchless homolog 1 (Drosophila)                                   | 1.695929 |          | 2.137698 |
| WD repeat domain 34                                                | 1.250645 | 1.048764 | 2.385634 |
| potassium inwardly-rectifying channel, subfamily J, member         | 0.459673 | 0.641895 | 0.551123 |
| solute carrier family 7, (neutral amino acid transporter, y+ sy    | 0.143934 | 0.639454 | 0.033747 |
| secretogranin III                                                  | 0.520852 | 1.584562 | 0.476514 |
| similar to voltage-gated potassium channel KV11.1 transcrip        | 0.379151 | 0.611245 | 0.964875 |
| complement component 1, q subcomponent, B chain                    | 3.248248 | 1.788189 | 4.307354 |
| solute carrier family 47, member 1                                 | 0.297308 |          | 2.091339 |
| solute carrier family 47, member 2                                 |          | 2.088053 |          |
| Dmx-like 2 /// similar to rabconnectin                             |          | 1.517126 |          |
| phospholipase C, beta 2                                            | 1.442967 | 1.00015  |          |
| phospholipase C, beta 2                                            | 1.405872 | 0.975352 | 0.86845  |
| phospholipase C, beta 2                                            | 1.651773 | 1.91098  | 2.122703 |
| chromosome 12 open reading frame 51                                |          | 0.309034 |          |
| phosphorylase kinase, alpha 1 (muscle)                             | 2.05403  | 0.788573 | 1.025996 |

|                                                                         |          |          |          |
|-------------------------------------------------------------------------|----------|----------|----------|
| TRAF-type zinc finger domain containing 1                               | 3.368181 | 1.023592 |          |
| chromosome 10 open reading frame 56                                     | 0.863307 | 0.807038 | 0.456155 |
| erythrocyte membrane protein band 4.2                                   |          |          | 13.99565 |
| hypothetical protein LOC771136 /// transglutaminase 3 (E polypeptide, . | 0.114799 |          | 0.078063 |
| hypothetical protein LOC771136                                          |          |          | 15.49335 |
| ATPase, Ca <sup>++</sup> transporting, plasma membrane 2                | 0.358627 |          | 0.757128 |
| Sema domain, transmembrane domain (TM), and cytoplasmic                 | 1.366447 | 0.898273 | 2.291115 |
| phosphatase and actin regulator 3                                       | 1.187831 | 3.003984 | 1.956656 |
| solute carrier family 6 (neurotransmitter transporter, GABA), member 11 |          |          |          |
| synaptonemal complex protein 2                                          | 0.517917 |          | 0.19858  |
| G-2 and S-phase expressed 1                                             | 0.542908 | 1.529715 | 0.499491 |
| similar to TBP-associated factor                                        | 1.215856 | 0.709356 | 0.316237 |
| similar to TBP-associated factor                                        | 0.747776 | 1.230594 | 0.777943 |
| ATG7 autophagy related 7 homolog (S. cerevisiae)                        |          | 0.427927 |          |
| ATG7 autophagy related 7 homolog (S. cerevisiae)                        | 2.330303 | 2.981335 | 0.465371 |
| LSM14A, SCD6 homolog A (S. cerevisiae)                                  | 4.415528 | 0.56683  | 0.828828 |
| LSM14A, SCD6 homolog A (S. cerevisiae)                                  | 1.588275 | 0.681247 | 0.43083  |
| insulin receptor substrate 1                                            | 1.029494 |          |          |
| similar to KIAA1486 protein                                             |          |          | 0.33963  |
| tRNA splicing endonuclease 2 homolog (S. cerevisiae)                    | 0.784812 | 1.279537 | 0.590142 |
| chromosome 10 open reading frame 11                                     | 2.073068 | 1.25986  | 1.085767 |
| peptidyl arginine deiminase, type II                                    | 1.003429 |          | 1.254066 |
| catechol-O-methyltransferase domain containing 1                        | 0.809359 | 0.846638 | 2.338606 |
| SHC (Src homology 2 domain containing) family, member 4                 | 2.549623 | 0.81536  | 0.177102 |
| SHC (Src homology 2 domain containing) family, member 4                 | 1.492184 | 0.448509 | 0.256052 |
| SHC (Src homology 2 domain containing) family, member 4                 | 1.416286 | 0.42691  | 0.283754 |
| hypothetical LOC415973                                                  |          |          | 2.631491 |
| DEAH (Asp-Glu-Ala-His) box polypeptide 30                               | 0.883065 | 1.038272 | 1.687012 |
| similar to UPF0101 protein CGI-137 (Protein AD-004)                     | 0.742425 | 0.781054 | 0.836539 |
| MYST histone acetyltransferase (monocytic leukemia) 4                   | 3.652427 | 1.343345 | 0.37634  |
| testis expressed 14                                                     |          | 0.444608 | 0.064466 |
| Fanconi anemia, complementation group A                                 |          | 2.352982 |          |
| chromosome 1 open reading frame 27                                      | 1.441255 | 0.995216 | 1.063826 |
| chromosome 1 open reading frame 27                                      | 1.614273 | 0.937318 | 0.59138  |
| dopamine receptor D4                                                    | 0.562384 |          |          |
| chromosome 1 open reading frame 26                                      | 0.42753  | 1.118611 | 0.649402 |
| family with sequence similarity 124B                                    |          | 2.215129 | 0.861479 |
| fibulin 2                                                               | 0.720933 | 1.584875 | 0.274876 |
| TAF4 RNA polymerase II, TATA box binding protein (TBP                   | 1.40525  | 0.952166 | 0.419265 |
| hypothetical LOC416899 /// hypothetical protein LOC768372               |          | 0.838063 |          |

|                                                                |          |          |          |
|----------------------------------------------------------------|----------|----------|----------|
| KIAA0913                                                       |          | 0.337069 | 1.34659  |
| similar to KIAA0595 protein                                    |          | 0.104648 |          |
| PHD finger protein 2                                           | 1.178356 | 0.707161 | 0.216382 |
| PHD finger protein 2                                           | 1.006048 | 0.584759 | 0.321744 |
| GTP binding protein 5 (putative)                               | 0.660087 | 0.861509 | 0.641418 |
| similar to GTPase, IMAP family member 7                        | 0.320247 | 0.893034 | 1.733279 |
| similar to GTPase, IMAP family member 7                        | 0.363129 | 0.939182 | 1.323637 |
| KIAA0423                                                       | 0.596317 | 0.95748  |          |
| kelch-like 12 (Drosophila)                                     |          | 16.17075 | 0.683587 |
| similar to mKIAA0746 protein                                   | 0.946695 | 0.926615 | 0.363918 |
| synaptopodin 2-like                                            | 0.491422 |          |          |
| WNK lysine deficient protein kinase 2                          | 3.194813 | 0.51636  | 0.277924 |
| WNK lysine deficient protein kinase 2                          | 1.994309 | 0.353096 | 0.454963 |
| WNK lysine deficient protein kinase 2                          | 1.723105 | 0.341989 | 0.123407 |
| monoacylglycerol O-acyltransferase 1                           |          | 0.778977 | 5.902982 |
| adenylate cyclase activating polypeptide 1 (pituitary) receptc | 0.871145 | 4.519436 | 1.466497 |
| UBX domain containing 5                                        | 0.66185  | 0.755876 | 0.245637 |
| adenylate cyclase activating polypeptide 1 (pituitary) receptc | 0.564721 | 1.098815 | 4.307844 |
| ubiquitin specific peptidase 54                                |          | 2.835677 | 0.596534 |
| exostoses (multiple)-like 2                                    |          | 0.1682   |          |
| growth-hormone releasing hormone-like peptide receptor         | 0.73278  | 0.141609 |          |
| growth-hormone releasing hormone-like peptide receptor         | 0.253853 |          | 0.200276 |
| bicaudal D homolog 2 (Drosophila)                              | 0.816405 | 1.021083 | 0.027713 |
| spermatogenesis associated 2-like                              |          |          | 0.051047 |
| similar to SYT9 protein                                        |          | 6.257423 | 17.44529 |
| hypothetical LOC424816                                         | 0.970936 | 0.998968 | 0.64056  |
| olfactomedin-like 1                                            |          |          | 3.587683 |
| lipase maturation factor 1                                     | 0.480774 | 1.170322 | 0.684292 |
| solute carrier family 25, member 36                            | 0.822537 | 1.407417 | 0.187273 |
| T-box 2 /// T-box 4                                            | 0.304265 | 8.224118 | 0.529658 |
| zinc finger and BTB domain containing 47                       |          | 0.363385 |          |
| kelch repeat and BTB (POZ) domain containing 5                 |          | 3.15968  |          |
| kelch repeat and BTB (POZ) domain containing 5                 | 1.013975 | 0.827959 | 0.27564  |
| kelch repeat and BTB (POZ) domain containing 5                 |          |          | 0.244574 |
| PTPRF interacting protein, binding protein 2 (liprin beta 2)   | 2.529941 | 1.020555 | 0.797406 |
| spire homolog 2 (Drosophila)                                   |          |          | 2.090484 |
| carbonic anhydrase VII                                         |          | 3.656593 |          |
| ovochoyase 2                                                   |          | 0.187234 | 1.000851 |
| chromosome 20 open reading frame 151                           |          | 30.92738 |          |
| seryl-tRNA synthetase                                          | 0.679793 | 1.070692 | 1.928373 |



|                                                                         |          |          |          |
|-------------------------------------------------------------------------|----------|----------|----------|
| ubiquitin specific peptidase 32                                         | 1.074009 | 0.756232 | 1.286817 |
| fatty acyl CoA reductase 1                                              | 0.488239 |          | 0.559935 |
| sorbin and SH3 domain containing 1                                      |          | 3.547469 |          |
| sorbin and SH3 domain containing 1                                      |          |          | 1.910623 |
| similar to lysophosphatidic acid receptor                               |          | 2.208671 | 0.073605 |
| tumor necrosis factor receptor superfamily, member 9                    | 1.158833 | 0.628921 | 0.660543 |
| tumor necrosis factor receptor superfamily, member 9                    | 1.274562 | 1.018753 | 0.275995 |
| similar to Ran-binding protein 2 /// similar to RanBP2 (Ran-binding pro |          | 3.235959 | 1.181565 |
| mitochondrial rRNA methyltransferase 1 homolog (S. cerevi               | 0.934082 | 0.920442 | 2.223109 |
| COP9 constitutive photomorphogenic homolog subunit 5 (Arabidopsis)      |          | 17.03376 |          |
| apoptosis antagonizing transcription factor                             |          | 5.200778 | 0.132729 |
| FRAS1 related extracellular matrix 1                                    | 0.391172 | 1.102593 |          |
| FRAS1 related extracellular matrix 1                                    |          | 1.30925  |          |
| zinc finger, DHHC-type containing 21                                    | 0.360735 | 0.903699 | 1.779497 |
| coiled-coil domain containing 66                                        | 0.914749 | 1.229934 | 1.666079 |
| hydroxysteroid (17-beta) dehydrogenase 2                                |          | 0.303199 |          |
| AP1 gamma subunit binding protein 1                                     | 0.469704 | 1.130953 | 1.674988 |
| parathyroid hormone 1 receptor                                          | 5.803699 | 2.108162 | 2.740852 |
| Rho guanine nucleotide exchange factor (GEF) 3                          | 1.574268 | 1.038185 | 0.59826  |
| hypothetical protein LOC769642                                          |          |          |          |
| similar to voltage-gated sodium channel type IV alpha subun             | 0.7984   |          |          |
| phosphoinositide-3-kinase, catalytic, beta polypeptide                  | 0.759308 | 2.837742 | 0.10115  |
| adaptor protein, phosphotyrosine interaction, PH domain and             | 0.972627 | 1.136511 | 1.958349 |
| myosin XVIIIIB                                                          | 1.27149  |          | 2.332171 |
| integral membrane protein 2C                                            | 1.055594 | 0.699402 | 0.173773 |
| G protein-coupled receptor 55                                           | 0.782383 | 1.227056 | 0.223288 |
| G protein-coupled receptor 35                                           |          | 0.102406 |          |
| G protein-coupled receptor 35                                           | 3.736485 | 0.608998 | 0.15329  |
| period homolog 3 (Drosophila)                                           |          |          | 4.534376 |
| period homolog 3 (Drosophila)                                           | 3.120841 | 0.887343 | 0.679697 |
| transducin (beta)-like 3                                                | 0.9689   | 1.460325 | 2.130645 |
| neurofibromin 1                                                         | 2.016468 | 0.732175 | 1.559857 |
| Hermansky-Pudlak syndrome 4                                             |          | 1.508938 | 2.644766 |
| dynein heavy chain domain 2                                             | 2.412892 | 0.991291 | 0.669595 |
| opioid growth factor receptor                                           | 2.074239 | 1.573638 | 2.946644 |
| solute carrier family 44, member 3                                      | 1.372199 |          | 2.050556 |
| coagulation factor III (thromboplastin, tissue factor)                  | 4.311979 | 2.162928 | 3.530741 |
| transient receptor potential cation channel, subfamily M, mei           | 1.062806 |          | 0.744443 |
| myosin IG                                                               |          |          |          |
| tuberous sclerosis 2                                                    |          |          |          |

|                                                                          |          |          |          |
|--------------------------------------------------------------------------|----------|----------|----------|
| hypothetical LOC422211                                                   |          |          | 2.257869 |
| hypothetical LOC428402                                                   |          | 1.616475 | 0.58856  |
| hypothetical LOC428402                                                   | 1.388583 | 7.354839 | 0.183501 |
| similar to OTTHUMP00000028696                                            |          | 4.736291 |          |
| cysteine-rich secretory protein LCCL domain containing 2                 | 0.497709 | 0.866515 | 0.67681  |
| tumor necrosis factor, alpha-induced protein 1 (endothelial)             | 1.46528  | 1.676027 | 1.520223 |
| sulfide quinone reductase-like (yeast)                                   | 0.92841  | 1.237857 | 0.386872 |
| sulfide quinone reductase-like (yeast)                                   | 1.062379 | 1.070722 | 0.593764 |
| cadherin, EGF LAG seven-pass G-type receptor 3 (flamingo)                | 2.320024 | 0.852635 | 1.51372  |
| small G protein signaling modulator 2                                    | 0.743262 | 2.596652 |          |
| hypothetical LOC428705                                                   | 0.587144 |          |          |
| similar to MGC82394 protein                                              | 0.579852 | 2.078597 | 2.442371 |
| baculoviral IAP repeat-containing 7 (livin)                              |          |          | 2.968814 |
| polycystic kidney disease 2-like 1                                       |          | 7.162791 |          |
| HMG box domain containing 3                                              | 3.113907 | 0.508235 | 1.295402 |
| junctophilin 3                                                           | 1.051993 | 0.985722 | 2.477543 |
| ATP-binding cassette, sub-family G (WHITE), member 2                     | 0.672483 | 2.158604 | 2.165752 |
| ATP-binding cassette, sub-family G (WHITE), member 2                     | 0.825761 | 2.172598 | 0.825648 |
| arachidonate 5-lipoxygenase                                              | 3.479931 |          |          |
| WD repeat domain 40A                                                     | 0.354315 | 1.49284  | 0.629152 |
| hypothetical LOC427400                                                   | 0.350133 | 0.690808 | 0.374006 |
| hypothetical protein LOC772338                                           | 0.804785 | 2.0651   |          |
| potassium voltage-gated channel, KQT-like subfamily, member 2            |          |          |          |
| SRY (sex determining region Y)-box 13                                    | 0.549207 | 2.390148 |          |
| src-related kinase lacking C-terminal regulatory tyrosine and            | 0.220183 | 0.520591 |          |
| src-related kinase lacking C-terminal regulatory tyrosine and N-terminal |          | 1.080357 | 0.422047 |
| hexosaminidase (glycosyl hydrolase family 20, catalytic dom              | 0.658884 | 1.363664 | 1.243245 |
| eukaryotic elongation factor, selenocysteine-tRNA-specific               | 0.776191 |          | 0.256749 |
| family with sequence similarity 69, member A                             | 1.229971 | 1.09396  | 0.475731 |
| pancreatic polypeptide receptor 1                                        | 2.770532 |          | 6.010033 |
| histidine decarboxylase                                                  |          |          | 0.157809 |
| dihydroxyacetone kinase 2 homolog (S. cerevisiae)                        | 0.566306 | 1.303589 | 0.461771 |
| Sec61 alpha 1 subunit (S. cerevisiae)                                    | 0.785722 | 0.876866 | 1.073946 |
| leucine carboxyl methyltransferase 1                                     | 1.268545 | 1.174731 | 0.672137 |
| BTB (POZ) domain containing 8                                            | 0.751661 | 1.140684 | 0.723674 |
| BTB (POZ) domain containing 8                                            | 1.665939 | 0.838762 | 0.48085  |
| protein tyrosine phosphatase, non-receptor type 7                        | 1.558877 |          | 1.369613 |
| growth differentiation factor 10                                         | 2.225514 | 0.814751 | 0.720008 |
| ankyrin repeat and BTB (POZ) domain containing 1                         | 0.76202  | 0.978186 | 0.376163 |
| WAS protein homology region 2 domain containing 1                        | 2.158546 | 1.042495 | 1.654504 |

|                                                                            |          |          |          |
|----------------------------------------------------------------------------|----------|----------|----------|
| pecanex homolog (Drosophila)                                               | 1.647088 | 1.013789 | 0.204172 |
| BTB (POZ) domain containing 8                                              | 1.235596 | 0.91704  | 0.706405 |
| sterile alpha motif domain containing 10                                   | 3.149559 |          |          |
| homer homolog 2 (Drosophila)                                               | 0.4422   | 0.752203 |          |
| similar to dedicator of cytokinesis 11                                     | 0.824334 | 0.083135 | 0.339014 |
| AXIN1 up-regulated 1                                                       | 1.050261 | 0.849793 | 0.154558 |
| PITPNM family member 3                                                     | 1.886679 | 2.231915 | 4.988335 |
| cell division cycle 7 homolog (S. cerevisiae)                              | 1.663817 | 1.034652 | 0.56149  |
| membrane-associated ring finger (C3HC4) 2                                  | 0.871597 | 1.03745  | 0.429077 |
| zinc finger and BTB domain containing 46                                   |          | 0.492252 | 0.624113 |
| tektin 1                                                                   | 0.496419 | 0.868348 | 0.770891 |
| partner and localizer of BRCA2                                             | 0.838096 | 1.457673 | 2.250845 |
| glypican 3                                                                 | 1.204681 | 3.454945 | 13.06277 |
| zinc finger CCCH-type containing 18                                        | 0.369156 | 1.227521 | 0.426066 |
| plexin A1                                                                  | 1.113092 | 0.490658 | 0.758519 |
| endonuclease G-like 1                                                      | 0.695492 | 1.307515 | 0.425453 |
| heterogeneous nuclear ribonucleoprotein A0                                 | 1.327114 | 1.177259 | 0.151231 |
| Ras homolog enriched in brain                                              | 1.349394 | 1.108832 | 0.305559 |
| otogelin                                                                   | 0.851776 |          |          |
| acyl-CoA synthetase family member 3                                        |          |          | 2.026536 |
| MAP7 domain containing 3                                                   | 2.238932 | 0.634927 | 0.765114 |
| Kruppel-like factor 15                                                     | 4.79698  |          | 1.628987 |
| piggyBac transposable element derived 3                                    | 0.696053 |          |          |
| MAP7 domain containing 3                                                   | 0.793791 | 0.746506 | 1.346819 |
| espin-like                                                                 | 1.920573 | 0.828404 | 2.04396  |
| galactosamine (N-acetyl)-6-sulfate sulfatase (Morquio syndrome, muco       |          | 1.062922 | 0.659622 |
| jumonji domain containing 5                                                |          | 1.100771 | 0.705919 |
| similar to Lipase A, lysosomal acid, cholesterol esterase (Wolman disease) |          |          | 0.174678 |
| G protein-coupled receptor 112                                             |          | 4.137325 |          |
| interleukin 4 receptor                                                     |          | 5.526638 | 0.155915 |
| dipeptidyl-peptidase 6                                                     |          |          | 11.70656 |
| interleukin 21 receptor                                                    | 3.161778 | 1.613979 | 4.573983 |
| chloride channel, calcium activated, family member 2                       | 1.722984 | 1.978831 | 0.203845 |
| similar to calcium-activated chloride channel                              |          | 4.334696 | 14.41544 |
| family with sequence similarity 38, member A                               | 0.468659 |          |          |
| PAX interacting (with transcription-activation domain) prote               | 1.02969  | 0.948076 | 0.470877 |
| ankyrin repeat domain 47                                                   | 0.785293 | 0.796979 | 1.290036 |
| potassium channel tetramerisation domain containing 5                      | 0.889388 | 1.108492 | 0.362196 |
| solute carrier family 6 (neurotransmitter transporter, taurine)            | 2.03066  | 0.834641 | 0.463438 |
| p21 (CDKN1A)-activated kinase 2                                            |          | 0.66846  | 0.351341 |

|                                                              |          |          |          |
|--------------------------------------------------------------|----------|----------|----------|
| ADP-ribosyltransferase 1 /// GPI-anchored ADP-ribosyltrans   | 17.8758  | 9.941776 | 3.950572 |
| ADP-ribosyltransferase 1                                     |          |          | 16.78286 |
| ADP-ribosyltransferase 1                                     | 10.00701 | 4.741426 | 2.10108  |
| aryl-hydrocarbon receptor nuclear translocator 2             | 2.281846 | 1.018512 | 0.413108 |
| chromosome 16 open reading frame 45                          | 0.233723 | 1.142596 |          |
| chromosome 16 open reading frame 45                          |          | 2.58814  | 0.681618 |
| potassium voltage-gated channel, KQT-like subfamily, mem     | 0.107006 |          |          |
| PHD finger protein 13                                        | 2.004295 | 0.905406 | 1.118107 |
| tubulin tyrosine ligase-like family, member 9                | 1.755735 | 0.805504 | 5.166606 |
| tubulin tyrosine ligase-like family, member 9                | 1.678435 | 0.46072  | 2.968992 |
| XK, Kell blood group complex subunit-related family, meml    | 0.687616 | 0.853244 | 0.868451 |
| plexin A4, B                                                 | 0.620999 | 1.009876 | 2.117933 |
| KIAA0430                                                     | 0.020243 |          |          |
| 5-hydroxytryptamine (serotonin) receptor 7 (adenylate cycla  | 1.081477 | 2.438446 | 0.201427 |
| similar to Transmembrane 9 superfamily protein member 2 p    | 0.607853 | 1.208351 | 0.486078 |
| protein tyrosine phosphatase, receptor type, N polypeptide 2 |          | 2.012525 |          |
| zinc finger, AN1-type domain 6                               |          | 0.214963 |          |
| human immunodeficiency virus type I enhancer binding prot    | 4.919955 | 0.860681 | 0.819968 |
| family with sequence similarity 62 (C2 domain containing) r  | 0.834199 | 0.256132 | 0.604947 |
| cirrhosis, autosomal recessive 1A (cirhin)                   | 1.622807 | 0.995908 | 3.021261 |
| ubiquitin associated and SH3 domain containing, B            | 0.758669 |          | 1.002029 |
| kinesin family member 3B                                     |          | 0.437654 | 0.894086 |
| similar to cytosolic nucleotidase I                          | 1.436029 | 1.023235 | 0.400039 |
| component of oligomeric golgi complex 8                      | 0.925364 | 0.969521 | 1.614987 |
| ATPase, class VI, type 11C                                   |          | 0.223905 |          |
| XK, Kell blood group complex subunit-related, X-linked       | 1.120498 | 1.404298 | 1.080891 |
| glutamate receptor, ionotropic, kainate 4                    | 0.389623 |          |          |
| adenosine A2a receptor                                       | 1.031867 | 1.059079 | 0.800232 |
| lipase, member H                                             | 2.357244 |          | 1.067366 |
| ATP-binding cassette, sub-family C (CFTR/MRP), member        | 1.781061 | 0.782204 | 0.424632 |
| Rho guanine nucleotide exchange factor (GEF) 12              | 0.940137 | 1.141981 | 0.769982 |
| BR serine/threonine kinase 2                                 |          | 0.487243 |          |
| transcriptional adaptor 3 (NGG1 homolog, yeast)-like         | 0.771379 | 0.723728 | 1.348914 |
| RAB36, member RAS oncogene family                            | 0.79754  | 0.602469 | 1.779679 |
| POU class 2 homeobox 3                                       |          |          | 0.071599 |
| tripartite motif-containing 29                               |          | 1.464189 | 1.744179 |
| outer mitochondrial membrane cytochrome b5                   |          |          |          |
| xylosyltransferase I                                         | 1.888335 | 0.851315 | 3.143647 |
| xylosyltransferase I                                         | 1.12803  | 0.691334 | 0.372006 |
| exocyst complex component 6                                  | 0.471177 | 1.496354 | 0.94706  |

|                                                                         |          |          |          |
|-------------------------------------------------------------------------|----------|----------|----------|
| melanoma cell adhesion molecule                                         | 1.75502  | 1.32847  |          |
| KIN, antigenic determinant of recA protein homolog (mouse               | 0.587415 | 0.50099  | 2.445843 |
| PDZ domain containing 3                                                 | 0.677536 |          |          |
| Regulation of nuclear pre-mRNA domain containing 1B                     | 0.946627 | 0.960058 | 0.27209  |
| ATP-binding cassette, sub-family G (WHITE), member 4                    | 0.90021  |          | 1.26453  |
| sushi-repeat-containing protein, X-linked 2                             |          |          | 0.36005  |
| kelch-like 25 (Drosophila)                                              | 0.884138 | 2.374445 | 0.085682 |
| similar to iron binding protein                                         | 0.886485 |          | 0.484698 |
| hypothetical protein LOC771371                                          | 1.286704 |          |          |
| solute carrier organic anion transporter family, member 3A1             | 1.15988  | 0.77735  | 0.432548 |
| hypothetical LOC415505                                                  | 0.863162 | 1.136713 | 1.240254 |
| transmembrane channel-like 7                                            | 0.884968 | 1.7173   | 0.354579 |
| similar to GalNAc alpha 2,6-sialyltransferase                           | 1.582519 |          | 4.114184 |
| BAI1-associated protein 2                                               | 0.624238 | 0.899938 | 1.101935 |
| minichromosome maintenance complex component 10                         | 0.755959 | 2.416636 | 0.543545 |
| similar to KIAA0419                                                     | 0.399602 | 0.973973 | 0.535911 |
| claudin 22                                                              | 0.763632 | 0.539937 | 2.029738 |
| phosphofructokinase, platelet                                           | 1.446906 | 0.827294 | 0.112094 |
| dual specificity phosphatase 11 (RNA/RNP complex 1-intera               | 2.385062 | 0.829228 | 0.987465 |
| dual specificity phosphatase 11 (RNA/RNP complex 1-intera               | 0.770511 | 1.934286 | 0.346945 |
| hypothetical LOC423820                                                  | 1.035601 | 0.974207 | 3.053236 |
| von Willebrand factor A domain containing 3A                            |          |          |          |
| similar to furosemide-sensitive K-Cl cotransporter                      | 0.378672 |          | 1.132515 |
| similar to NAD(P) dependent steroid dehydrogenase-like                  |          |          | 0.131352 |
| ubiquitin specific peptidase 28                                         | 1.403772 | 1.131891 | 0.374305 |
| multiple C2 domains, transmembrane 2                                    | 1.067496 | 1.195567 | 5.10507  |
| toll-like receptor 4                                                    | 2.052783 |          |          |
| ring finger protein 213                                                 | 3.614724 |          | 13.83462 |
| arrestin domain containing 4                                            | 0.455114 | 0.451113 | 1.169442 |
| hypothetical LOC427509                                                  | 0.680049 | 0.241363 | 0.520826 |
| hypothetical protein LOC771298                                          | 1.630094 | 0.952089 | 0.375824 |
| similar to putative endoplasmic reticulum protein family member, with ε |          | 0.492995 |          |
| similar to acid alpha glucosidase                                       | 1.043792 | 1.630571 | 1.269435 |
| similar to gamma-aminobutyric acid (GABA) A receptor, pi                |          |          | 0.184721 |
| leucine rich repeat containing 28                                       | 0.955635 | 1.022688 | 0.20038  |
| ATPase type 13A3                                                        | 1.40738  | 1.256579 | 0.406349 |
| ATPase type 13A3                                                        | 1.460869 | 0.652029 | 0.474748 |
| KIAA0152                                                                | 0.874009 | 1.099599 | 0.514521 |
| lines homolog 1 (Drosophila)                                            | 2.232427 | 0.881489 | 0.745654 |
| ring finger protein 207                                                 |          | 0.661618 | 2.790097 |

|                                                                       |          |          |          |
|-----------------------------------------------------------------------|----------|----------|----------|
| par-3 partitioning defective 3 homolog (C. elegans)                   |          | 1.161194 | 1.373203 |
| AF4/FMR2 family, member 4                                             | 0.904325 | 1.144814 | 0.479259 |
| AF4/FMR2 family, member 4                                             | 0.921841 | 1.289449 | 0.507474 |
| acyl-Coenzyme A oxidase 2, branched chain                             | 0.950972 | 0.428036 | 0.22082  |
| acyl-Coenzyme A oxidase 2, branched chain                             | 0.775366 | 0.546913 | 0.474895 |
| C-type lectin domain family 16, member A                              | 0.780099 | 0.738034 | 0.490892 |
| similar to leucine-rich repeat kinase 2                               | 0.706493 | 0.812805 | 0.465318 |
| phosphatidylglycerophosphate synthase 1                               | 1.189812 | 0.908467 | 0.682234 |
| phosphatidylglycerophosphate synthase 1                               | 1.016459 | 0.275077 |          |
| enhancer of polycomb homolog 1 (Drosophila)                           | 2.805057 | 1.412268 | 0.737913 |
| ATPase type 13A4                                                      | 0.164345 |          |          |
| RAB3A interacting protein (rabin3)-like 1                             | 1.231288 | 0.468489 | 0.43565  |
| kinesin family member 5B                                              | 2.03773  | 1.134622 | 0.504694 |
| musashi homolog 1 (Drosophila)                                        |          |          | 1.3813   |
| proprotein convertase subtilisin/kexin type 6                         | 0.55121  |          | 0.42437  |
| similar to PH domain containing protein                               | 1.364891 | 1.3309   | 1.429738 |
| Rho GTPase activating protein 12                                      | 1.452696 | 1.266158 | 1.057898 |
| zinc finger protein 438                                               | 1.67471  | 0.779826 | 0.379985 |
| hypothetical LOC416638                                                | 0.490036 | 3.041626 |          |
| similar to Down syndrome cell adhesion molecule DSCAML1               |          |          |          |
| hypothetical protein LOC771141                                        | 0.055017 |          |          |
| LIM domain containing preferred translocation partner in lip          | 0.474441 | 1.075855 | 1.534348 |
| hypothetical LOC427511                                                |          |          |          |
| LIM domain containing preferred translocation partner in lipoma       |          | 1.092341 | 3.493564 |
| mediator of RNA polymerase II transcription, subunit 19 hor           | 0.673663 | 1.344051 | 1.131245 |
| similar to alpha 1 type XXIV collagen                                 | 0.373656 | 0.037734 |          |
| RAS-like, family 12                                                   |          | 34.07162 | 0.093831 |
| hypothetical LOC422293                                                | 0.795176 | 1.143964 | 0.401188 |
| similar to S6 kinase 2                                                | 0.713206 | 0.254912 |          |
| syntaxin 12                                                           | 1.71007  | 0.705377 | 0.360597 |
| suppressor of defective silencing 3 homolog (S. cerevisiae)           | 1.287741 |          |          |
| ATP-binding cassette, sub-family C (CFTR/MRP), member 2               |          | 11.80554 |          |
| chromosome 20 open reading frame 174                                  | 1.346799 | 1.681456 | 1.02464  |
| membrane associated guanylate kinase, WW and PDZ doma                 | 0.334946 | 2.107364 | 0.372088 |
| hypothetical protein LOC771647                                        |          | 7.439543 | 0.604442 |
| slingshot homolog 1 (Drosophila)                                      |          | 1.513673 | 2.783848 |
| slingshot homolog 1 (Drosophila)                                      |          |          | 2.34166  |
| selectin E (endothelial adhesion molecule 1)                          | 24.7431  |          |          |
| hypothetical LOC420485                                                |          | 2.464282 |          |
| similar to neuropeptide /// similar to TAF4 RNA polymerase II, TATA b |          | 0.078116 |          |

|                                                             |          |          |          |
|-------------------------------------------------------------|----------|----------|----------|
| transmembrane protein 8 (five membrane-spanning domains)    | 0.331577 | 0.875814 | 1.002954 |
| similar to P1-A                                             |          |          | 0.198963 |
| similar to P1-A                                             | 0.756874 | 2.47981  | 0.035908 |
| cyclin M1                                                   |          | 0.384573 |          |
| leucyl-tRNA synthetase                                      | 2.554748 | 0.976479 | 1.954327 |
| leucyl-tRNA synthetase                                      | 1.301622 | 1.197572 | 0.499442 |
| microtubule associated serine/threonine kinase-like         |          | 4.443906 | 0.568541 |
| integrin alpha FG-GAP repeat containing 3                   | 0.831791 | 1.032653 | 0.070384 |
| DENN/MADD domain containing 4A                              | 0.61307  | 4.587178 | 1.306325 |
| zinc finger, FYVE domain containing 27                      | 1.120344 | 0.74929  | 0.70433  |
| ankyrin repeat domain 2 (stretch responsive muscle)         | 1.985623 | 0.756652 | 0.127838 |
| similar to RIKEN cDNA 4931428F04 gene /// hypothetical I    | 0.65131  | 0.696915 | 1.484162 |
| similar to BTB/POZ domain-containing protein KCTD16         | 0.625542 | 0.751916 | 0.378393 |
| similar to putative selenoprotein O                         | 0.292818 |          |          |
| kelch repeat and BTB (POZ) domain containing 8              | 1.294172 | 1.020468 | 2.295124 |
| myotubularin related protein 8                              | 1.677279 | 0.181126 |          |
| N-acetyltransferase 15 (GCN5-related, putative)             | 1.516157 | 0.969984 | 1.49429  |
| Cdc42 guanine nucleotide exchange factor (GEF) 9            | 1.293725 | 1.001097 | 1.748209 |
| slit homolog 1 (Drosophila)                                 | 0.723654 | 0.41826  | 1.615999 |
| calcium channel, voltage-dependent, T type, alpha 1G subun  | 0.839239 | 5.496658 |          |
| chromosome 20 open reading frame 86                         |          | 0.270838 |          |
| multiple EGF-like-domains 11                                |          |          |          |
| myosin IIIA                                                 | 0.515129 | 1.234243 | 0.067655 |
| TIMELESS interacting protein                                | 1.000646 | 0.92218  | 0.39059  |
| chromosome 10 open reading frame 63                         | 0.593494 | 0.366971 | 2.77898  |
| myosin IB                                                   | 0.64086  | 1.237707 |          |
| neuromedin U receptor 1                                     | 1.339427 | 1.009871 |          |
| hypothetical LOC427595                                      | 0.755483 |          | 2.753497 |
| proline dehydrogenase (oxidase) 1                           | 1.038342 | 0.662098 | 1.75956  |
| similar to WAS protein family, member 3                     |          |          | 1.078555 |
| hypothetical LOC416090                                      |          |          | 0.407374 |
| transmembrane protein 104                                   | 0.021094 | 0.786153 | 0.843929 |
| pleckstrin homology-like domain, family B, member 1         | 1.622107 | 0.708785 | 3.307913 |
| F-box protein 3                                             | 0.830795 | 0.970791 | 0.372215 |
| KIAA1217                                                    |          |          | 15.13056 |
| DIS3 mitotic control homolog (S. cerevisiae)-like 2         |          | 0.847307 | 0.847326 |
| forkhead box P1                                             | 0.961387 | 1.568929 | 1.390369 |
| fatty acid desaturase domain family, member 6               |          | 1.772806 | 0.497587 |
| cerebellin 4 precursor                                      |          |          |          |
| eukaryotic translation initiation factor 4E family member 3 | 3.257957 | 0.962597 | 0.384112 |

|                                                                           |          |          |          |
|---------------------------------------------------------------------------|----------|----------|----------|
| SHQ1 homolog ( <i>S. cerevisiae</i> )                                     | 1.411938 | 0.946085 | 0.396719 |
| zinc finger, DHHC-type containing 15                                      |          | 0.434591 | 1.204516 |
| hypothetical LOC415641 /// similar to rat GCP360                          | 1.088557 | 2.029891 | 0.531882 |
| hypothetical LOC415641 /// similar to rat GCP360                          | 0.871766 | 3.777949 | 0.259291 |
| Potassium voltage-gated channel, shaker-related subfamily, 1              | 1.958998 | 0.378442 | 1.075111 |
| alkaline phosphatase, intestinal                                          | 1.165521 | 0.842614 | 0.653539 |
| beta-transducin repeat containing                                         | 0.724555 | 2.097548 |          |
| hypothetical LOC417007                                                    | 0.967245 | 1.16371  | 2.684795 |
| beta-carotene dioxygenase 2                                               |          |          | 6.77709  |
| Similar to TJP3 protein                                                   | 1.580191 | 1.179218 | 2.689491 |
| endothelin converting enzyme-like 1                                       |          |          | 18.57505 |
| similar to neuropathy target esterase                                     | 0.974368 | 0.439423 | 1.316674 |
| peptidase domain containing associated with muscle regeneration 1         |          | 1.981509 | 0.159373 |
| low density lipoprotein receptor class A domain containing 3              | 0.922055 | 1.361773 | 0.140671 |
| low density lipoprotein receptor class A domain containing 3              | 1.070401 | 1.347149 | 0.017049 |
| cholinergic receptor, nicotinic, delta                                    | 1.64306  | 0.421297 | 1.117304 |
| laminin, beta 1                                                           | 1.283943 | 0.906465 | 0.538029 |
| cholinergic receptor, nicotinic, gamma                                    |          | 2.096359 | 50.50664 |
| calpain 5                                                                 | 1.377127 | 0.819787 |          |
| IQ motif containing H                                                     | 1.301031 | 1.448897 | 2.48175  |
| TNF receptor-associated factor 6                                          | 1.031612 | 0.958964 | 0.508177 |
| TNF receptor-associated factor 6                                          | 1.843053 | 1.021498 | 0.59656  |
| recombination activating gene 1                                           | 0.602948 | 0.738621 | 0.069896 |
| recombination activating gene 1                                           | 0.969228 | 0.806269 | 0.092181 |
| recombination activating gene 2                                           | 0.895548 | 0.909411 | 0.006622 |
| nuclear factor of activated T-cells, cytoplasmic, calcineurin-dependent 2 |          |          |          |
| solute carrier family 26, member 3                                        | 0.476905 |          |          |
| chromosome 10 open reading frame 112                                      | 2.232567 | 1.541726 |          |
| similar to GPI inositol-deacylase PGAP1                                   |          | 8.350884 |          |
| exostoses (multiple) 2                                                    | 0.545729 | 1.510905 | 0.719424 |
| chromosome 20 open reading frame 175                                      | 2.100797 | 0.609924 | 0.827654 |
| leukemia inhibitory factor (cholinergic differentiation factor)           | 1.050454 | 0.646443 | 1.465215 |
| component of oligomeric golgi complex 5                                   | 0.952935 | 0.888363 | 0.358795 |
| cellular repressor of E1A-stimulated genes 2                              | 5.134453 | 3.9804   |          |
| component of oligomeric golgi complex 5                                   | 12.92375 |          | 0.69581  |
| coronin, actin binding protein, 2B                                        | 1.300336 | 0.462543 |          |
| p21 (CDKN1A)-activated kinase 3                                           |          | 1.960615 | 2.646444 |
| astacin-like metallo-endopeptidase (M12 family)                           | 0.475638 |          | 3.516369 |
| kinesin family member 23                                                  | 1.325923 | 1.034293 | 0.759287 |
| eyes absent homolog 3 ( <i>Drosophila</i> )                               | 1.503456 | 1.287988 | 0.353917 |



|                                                           |          |          |          |
|-----------------------------------------------------------|----------|----------|----------|
| coiled-coil domain containing 88A                         | 0.969248 | 1.346105 | 0.393382 |
| coiled-coil domain containing 88A                         | 0.796397 | 0.68547  | 0.319095 |
| coiled-coil domain containing 88A                         | 1.264557 | 0.93028  | 0.492763 |
| ataxin 7-like 1                                           | 2.247859 | 0.55566  | 0.310486 |
| myosin, heavy chain 13, skeletal muscle                   |          |          | 20.5194  |
| chromosome 10 open reading frame 112                      | 0.181433 |          |          |
| shugoshin-like 2 (S. pombe)                               | 0.822571 | 0.377103 | 0.943967 |
| F-box protein, helicase, 18                               | 0.966636 | 0.869771 | 0.698627 |
| toll-like receptor 15                                     | 2.875911 | 0.710201 | 1.797109 |
| hypothetical LOC424943                                    |          |          |          |
| 5'-nucleotidase, cytosolic II                             | 1.939611 | 1.758948 | 0.351961 |
| phosphatidylinositol-4-phosphate 5-kinase, type I, gamma  |          | 1.227377 | 0.196506 |
| hyaluronoglucosaminidase 1                                |          |          | 3.720752 |
| acid phosphatase 2, lysosomal                             | 0.876126 | 0.872588 | 0.415693 |
| CASP8 and FADD-like apoptosis regulator                   | 2.947637 | 2.031154 | 0.875779 |
| CASP8 and FADD-like apoptosis regulator                   | 0.224891 | 0.968012 | 1.133869 |
| Cell division cycle associated 8                          | 3.801046 | 0.755747 | 0.468205 |
| interleukin 5 receptor, alpha                             | 0.420944 | 0.809388 | 0.952656 |
| family with sequence similarity 26, member B              | 1.115389 | 1.670965 | 0.20965  |
| family with sequence similarity 26, member A              |          | 0.452969 |          |
| hypothetical LOC416107                                    |          | 0.910388 |          |
| leucine-rich repeats and calponin homology (CH) domain co | 0.46181  | 0.885962 | 0.275361 |
| inositol 1,4,5-triphosphate receptor, type 1              | 1.031251 | 3.087388 | 1.170763 |
| oligonucleotide/oligosaccharide-binding fold containing 1 | 2.273579 | 0.734546 | 0.539758 |
| oligonucleotide/oligosaccharide-binding fold containing 1 | 2.780617 | 1.34572  | 0.423051 |
| caspase 10, apoptosis-related cysteine peptidase          | 4.192648 |          | 0.960417 |
| fibrinogen-like 2                                         | 0.896211 | 0.570078 | 0.467524 |
| calpain 10                                                | 0.894323 | 0.664516 | 0.489331 |
| calpain 10                                                | 0.808647 | 0.774905 | 0.317697 |
| pigeon homolog (Drosophila)                               | 2.425124 | 1.265917 | 0.571368 |
| similar to synaptotagmin-like protein 2-a delta 2S-II     | 1.234755 |          | 0.062361 |
| round spermatid basic protein 1-like                      | 1.415225 | 0.70367  | 0.202445 |
| feline sarcoma oncogene                                   | 0.879083 |          | 5.261864 |
| initiator caspase                                         | 0.657823 |          | 0.180515 |
| LIM and cysteine-rich domains 1                           | 0.747955 |          | 2.034514 |
| similar to synaptotagmin-like protein 2-a delta 2S-II     | 0.774976 | 0.61684  | 0.228407 |
| chromosome 10 open reading frame 78                       | 1.187232 | 0.823738 | 0.388452 |
| histidine acid phosphatase domain containing 2A           |          | 1.300125 |          |
| chromosome 20 open reading frame 74                       | 0.595565 | 0.958195 |          |
| von Hippel-Lindau tumor suppressor                        | 0.885355 | 0.830802 | 0.024181 |

|                                                                           |          |          |          |
|---------------------------------------------------------------------------|----------|----------|----------|
| hypothetical protein                                                      | 3.498598 | 1.283561 | 0.56626  |
| interleukin-1 receptor-associated kinase 2                                | 1.49213  | 0.747617 | 0.718374 |
| KIAA1754                                                                  | 1.333481 | 6.525229 | 0.645745 |
| dishevelled, dsh homolog 3 (Drosophila)                                   |          | 0.182805 |          |
| PFTAIRE protein kinase 2                                                  | 0.643691 | 1.110775 | 0.492253 |
| carbohydrate (keratan sulfate Gal-6) sulfotransferase 1                   | 0.865758 | 0.51431  | 0.149039 |
| DEAH (Asp-Glu-Ala-His) box polypeptide 8                                  | 0.391635 | 1.107893 | 0.568215 |
| DEAH (Asp-Glu-Ala-His) box polypeptide 8                                  |          | 0.26092  |          |
| cyclin-dependent kinase 3                                                 |          | 13.94269 |          |
| plexin D1                                                                 |          | 0.146473 |          |
| amyotrophic lateral sclerosis 2 (juvenile) chromosome region, candidate 8 |          |          | 31.68498 |
| guanylate cyclase 2F, retinal                                             | 0.162312 |          |          |
| pleckstrin homology domain containing, family M, member                   | 0.843633 | 0.392588 |          |
| vacuolar protein sorting 18 homolog (S. cerevisiae)                       | 1.223199 | 0.888321 | 0.186515 |
| Kruppel-like factor 7 (ubiquitous)                                        | 1.103531 | 0.714896 | 0.066724 |
| asparagine-linked glycosylation 3 homolog (S. cerevisiae, alj             | 0.936529 | 0.51129  | 4.26359  |
| carboxypeptidase O                                                        | 2.14912  | 1.677715 | 0.952311 |
| similar to glutamine synthetase                                           | 1.686009 | 1.307426 | 2.220846 |
| eukaryotic translation initiation factor 4 gamma, 1                       |          | 1.237486 | 2.266787 |
| bromodomain containing 1                                                  |          | 0.621242 | 0.043703 |
| bromodomain containing 1                                                  | 1.067954 | 1.167239 | 0.469642 |
| leucine rich repeat containing 32                                         | 0.398877 |          |          |
| protein phosphatase 2, regulatory subunit B', delta isoform               | 0.849919 | 2.156767 | 0.578063 |
| malate dehydrogenase 1B, NAD (soluble)                                    | 0.65846  | 0.55937  | 0.367318 |
| malate dehydrogenase 1B, NAD (soluble)                                    |          | 0.418671 |          |
| mal, T-cell differentiation protein                                       | 0.854236 | 1.756508 | 0.814708 |
| INO80 complex homolog 1 (S. cerevisiae)                                   | 1.259696 | 2.084262 | 0.83141  |
| survival motor neuron domain containing 1                                 | 0.510096 | 0.831921 | 1.62319  |
| NOL1/NOP2/Sun domain family, member 6                                     | 1.501523 | 0.755063 | 0.207529 |
| Opa interacting protein 5                                                 | 0.846193 | 1.243581 | 0.252782 |
| kelch-like 5 (Drosophila)                                                 |          | 0.938668 | 0.408559 |
| ADAM metallopeptidase domain 23                                           | 0.465163 | 0.496048 | 0.59866  |
| nucleolar and spindle associated protein 1                                | 0.79943  | 0.952538 | 0.696911 |
| G protein-coupled receptor 1                                              | 0.368926 |          |          |
| similar to glutaryl-Coenzyme A dehydrogenase                              | 0.90741  | 0.749663 | 2.456779 |
| similar to glutaryl-Coenzyme A dehydrogenase                              | 1.090222 | 0.820954 | 2.293687 |
| Rtf1, Paf1/RNA polymerase II complex component, homolog (S. cerevi        | 1.166647 |          | 0.241629 |
| hypothetical protein LOC771349                                            |          |          |          |
| hypothetical protein LOC771361                                            |          | 7.402308 |          |
| zinc finger and BTB domain containing 33                                  | 0.796796 | 1.941842 | 0.367364 |

|                                                                    |          |          |          |
|--------------------------------------------------------------------|----------|----------|----------|
| cullin 9                                                           |          | 2.283765 |          |
| hypothetical protein LOC771422                                     |          |          |          |
| MAX gene associated                                                | 0.779138 | 0.484354 | 2.19974  |
| cytotoxic T-lymphocyte-associated protein 4                        | 4.87602  | 4.993838 | 5.654279 |
| RNA binding motif protein 20                                       |          | 4.572618 |          |
| selenoprotein O                                                    |          |          | 0.132083 |
| Ras association (RalGDS/AF-6) and pleckstrin homology do           | 2.050218 | 0.284736 | 0.158357 |
| WD repeat domain 63                                                |          |          |          |
| TraB domain containing                                             | 1.134333 | 1.761518 | 3.122713 |
| zinc finger protein 800                                            | 0.78365  | 0.929476 | 1.139364 |
| mitogen-activated protein kinase 14                                |          |          | 0.152871 |
| complement component 1, q subcomponent-like 3                      |          |          | 0.403682 |
| JMJD7-PLA2G4B readthrough transcript                               | 3.242935 |          |          |
| patatin-like phospholipase domain containing 7                     |          | 0.062391 |          |
| hypothetical LOC420526                                             | 2.3417   | 1.828238 | 0.942915 |
| chromosome 2 open reading frame 13                                 | 1.257446 | 0.902029 | 0.417342 |
| MCF.2 cell line derived transforming sequence-like 2               |          | 1.342187 | 0.731732 |
| lysosomal-associated membrane protein 3                            | 0.620446 |          | 0.467322 |
| hypothetical LOC421270                                             |          |          | 3.048914 |
| glycerol-3-phosphate acyltransferase, mitochondrial                | 0.471029 | 2.130521 |          |
| Ras association (RalGDS/AF-6) domain family 5                      | 0.488663 | 0.777683 | 0.467931 |
| solute carrier family 1 (glutamate/neutral amino acid transpo      | 0.574523 | 0.885428 | 0.49442  |
| isocitrate dehydrogenase 1 (NADP+), soluble                        | 0.593837 | 1.195998 | 0.389042 |
| IQ motif and ubiquitin domain containing                           | 0.893529 | 1.360508 | 0.806879 |
| similar to urate oxidase (EC 1.7.3.3)                              |          | 0.051303 |          |
| sterile alpha motif domain containing 13                           | 0.617263 | 0.676958 | 0.768906 |
| ATPase, H <sup>+</sup> transporting, lysosomal accessory protein 1 | 1.178837 | 0.92551  | 0.401496 |
| protein-kinase, interferon-inducible double stranded RNA de        | 2.03439  | 0.833698 | 0.518581 |
| hydroxyacid oxidase (glycolate oxidase) 1                          |          |          |          |
| DnaJ (Hsp40) homolog, subfamily C, member 10                       | 0.79724  | 1.027693 | 0.489179 |
| phospholipase C, beta 1 (phosphoinositide-specific)                | 2.620179 | 1.41601  | 1.101031 |
| phospholipase C, beta 1 (phosphoinositide-specific)                | 0.475257 | 2.807717 | 1.403146 |
| vesicle transport through interaction with t-SNAREs homolo         | 0.95349  | 0.891818 | 0.312008 |
| solute carrier family 26, member 8                                 | 3.097602 | 0.83918  | 0.217714 |
| interleukin 1 receptor accessory protein-like 2                    | 0.268851 | 0.116031 |          |
| interleukin 1 receptor accessory protein-like 2                    | 0.09428  | 0.164314 | 0.25655  |
| hypothetical LOC427775                                             |          |          | 0.348963 |
| synaptotagmin IV                                                   | 2.828292 | 1.560037 |          |
| leucine rich repeat containing 26                                  | 2.334522 |          |          |
| EH domain binding protein 1                                        | 0.712177 | 0.975269 | 0.283523 |

|                                                                   |          |          |          |
|-------------------------------------------------------------------|----------|----------|----------|
| phospholipase C, beta 4                                           | 0.096868 |          |          |
| GTPase, IMAP family member 1                                      | 1.212246 | 2.519188 | 0.900758 |
| transmembrane protein 17                                          | 1.35052  | 0.899571 | 0.228112 |
| peroxisomal biogenesis factor 5-like                              | 0.792223 | 0.843021 | 0.401229 |
| rearranged L-myc fusion                                           | 0.91612  | 0.70424  | 0.447063 |
| spectrin, beta, non-erythrocytic 5                                |          | 0.096282 |          |
| spectrin, beta, non-erythrocytic 5                                |          | 2.032557 |          |
| forkhead box N2                                                   | 0.442835 | 0.902156 | 1.518423 |
| family with sequence similarity 73, member A                      | 0.892731 | 1.238373 | 1.112678 |
| exonuclease 3'-5' domain containing 3                             | 0.378872 | 0.549783 | 0.549994 |
| similar to tandem pore domain potassium channel THIK-2            | 0.577058 | 2.869624 | 0.368074 |
| phospholipase A2, group IVF                                       | 0.80468  | 0.915878 | 0.257706 |
| SMAD family member 7                                              | 0.481187 | 0.560959 | 1.457162 |
| hypothetical protein LOC768788                                    |          | 1.022394 | 0.024191 |
| guanine nucleotide binding protein (G protein), beta polypep      | 0.856738 | 2.058764 | 1.444972 |
| wingless-type MMTV integration site family, member 16             |          | 0.158175 |          |
| zinc finger, ZZ-type containing 3                                 | 1.559981 | 1.055516 | 0.474757 |
| STEAP family member 4                                             | 0.680303 |          |          |
| CWC22 spliceosome-associated protein homolog (S. cerevis          | 0.661838 | 1.037158 | 0.318447 |
| phosphatidylinositol glycan anchor biosynthesis, class K          | 1.05022  | 1.103935 | 0.499467 |
| similar to olfactory receptor MOR260-5                            |          | 7.154695 |          |
| TBC1 domain family, member 8B (with GRAM domain)                  | 1.637278 | 1.392449 | 0.40235  |
| ankyrin repeat domain 9                                           | 1.710065 | 0.39417  |          |
| fucosyltransferase 7 (alpha (1,3) fucosyltransferase)             | 2.159017 |          | 1.335402 |
| lysocardiolipin acyltransferase                                   | 0.46633  | 1.164352 | 0.647041 |
| actin-like 6A                                                     |          |          |          |
| calpain 13                                                        | 3.708238 | 1.819757 | 1.549725 |
| calpain 13                                                        |          |          | 2.554661 |
| UDP-N-acetyl-alpha-D-galactosamine:polypeptide N-acetylglactosami | 1.071521 |          | 0.030526 |
| general transcription factor IIA, 1-like                          | 1.283356 | 0.487832 | 0.560486 |
| general transcription factor IIA, 1-like                          | 0.851215 | 0.825936 | 0.498066 |
| titin                                                             |          |          |          |
| MARVEL domain containing 3                                        | 1.308466 | 1.069437 | 0.452337 |
| titin                                                             |          |          | 2.623321 |
| congenital dyserythropoietic anemia, type I                       | 1.619838 | 0.592941 | 1.407086 |
| CDC42 binding protein kinase alpha (DMPK-like)                    | 0.252348 | 0.643558 | 1.301113 |
| SFRS protein kinase 1                                             | 0.86051  | 0.842167 | 2.263649 |
| similar to fragile X mental retardation 2                         | 1.182246 | 0.758181 | 0.139066 |
| tRNA methyltransferase 6 homolog (S. cerevisiae)                  | 1.564609 | 0.924249 | 0.479558 |
| chromosome 10 open reading frame 96                               |          |          | 0.119603 |

|                                                               |          |          |          |
|---------------------------------------------------------------|----------|----------|----------|
| similar to Scale keratin (S-ker) (sKer)                       |          |          | 2.045472 |
| similar to ankyrin-repeat and fibronectin type III domain con | 7.122795 |          |          |
| hypothetical protein LOC770919                                | 0.412456 |          | 0.565246 |
| hypothetical LOC426835 /// hypothetical protein LOC77010      | 0.92035  |          | 2.151048 |
| amidohydrolase domain containing 2                            | 3.571161 | 1.495254 | 1.684756 |
| pancreatic lipase-related protein 3                           |          |          | 0.243127 |
| phospholipase D1, phosphatidylcholine-specific                | 0.438534 |          | 1.065441 |
| similar to RIKEN cDNA 6430537H07 gene                         | 1.397585 | 1.036773 | 0.244776 |
| transmembrane protein 62                                      | 1.103394 | 0.734174 | 0.831952 |
| RNA binding motif protein 46                                  | 19.44258 | 0.868284 |          |
| similar to KIAA1617 protein /// Scm-like with four mbt dom    | 1.873488 | 0.93578  | 4.801363 |
| neuropeptide Y receptor Y2                                    |          |          |          |
| dynein, axonemal, light chain 1                               | 19.23288 |          |          |
| RNA binding protein S1, serine-rich domain                    | 0.856552 | 0.916324 | 0.491816 |
| solute carrier family 18 (vesicular monoamine), member 2      | 0.828521 | 0.836234 | 10.93071 |
| PDZ domain containing 8                                       | 2.25552  |          |          |
| numb homolog (Drosophila)                                     |          |          | 2.178281 |
| nuclear VCP-like                                              |          | 1.905424 | 0.533683 |
| RNA binding motif protein 25                                  | 1.741116 | 2.182773 | 0.815799 |
| RNA binding motif protein 25                                  | 0.931001 | 1.210117 | 2.130058 |
| zinc finger, FYVE domain containing 1                         | 0.890286 | 0.642951 | 1.80823  |
| hematological and neurological expressed 1-like               |          |          | 0.159333 |
| hematological and neurological expressed 1-like               | 0.823365 | 0.852759 | 0.314488 |
| wingless-type MMTV integration site family member 2           |          | 0.100979 |          |
| polyhomeotic homolog 3 (Drosophila)                           | 1.126184 | 1.170899 | 1.096444 |
| polyhomeotic homolog 3 (Drosophila)                           | 0.735433 | 1.306079 | 1.269841 |
| leucine rich repeat containing 31                             | 1.021907 | 0.935153 | 3.011339 |
| G protein-coupled receptor kinase 5                           |          |          | 0.10613  |
| SPARC related modular calcium binding 1                       | 0.297978 | 1.458857 | 0.198023 |
| BCL2-associated athanogene 3                                  | 2.411889 | 0.636526 | 0.64775  |
| protein phosphatase 1, regulatory (inhibitor) subunit 3A (gly | 0.063926 | 4.749772 |          |
| KIAA1822-like                                                 | 1.178651 | 0.620517 | 0.297005 |
| profilin 3                                                    | 0.316572 | 0.998743 |          |
| similar to Egfl3 protein                                      |          |          | 2.082774 |
| similar to RIKEN cDNA C030048B08                              | 1.521345 | 0.77588  | 0.560457 |
| phosphatidic acid phosphatase type 2 domain containing 1A     | 5.953728 | 0.85301  |          |
| cyclin-dependent kinase 6                                     | 0.768301 | 1.712233 | 0.283348 |
| sterile alpha motif domain containing 9-like                  | 8.571686 | 2.336709 | 2.786612 |
| dedicator of cytokinesis 4                                    |          |          |          |
| HEPACAM family member 2                                       | 1.281053 | 1.703025 | 2.020556 |

|                                                                                     |          |          |          |
|-------------------------------------------------------------------------------------|----------|----------|----------|
| chromosome 14 open reading frame 83                                                 |          | 0.977544 |          |
| arginyltransferase 1                                                                | 0.972966 | 0.571527 | 0.572053 |
| phosphatidylinositol glycan anchor biosynthesis, class H                            | 1.255347 | 1.118257 | 0.333821 |
| similar to protein kinase C-theta                                                   | 1.239455 | 0.801938 | 0.597639 |
| dynein, cytoplasmic 1, intermediate chain 2                                         | 1.231337 | 0.83942  | 0.317923 |
| prickle homolog 1 (Drosophila)                                                      |          | 7.26675  | 0.789133 |
| sparc/osteonectin, cwcv and kazal-like domains proteoglycan                         | 0.559566 |          | 0.114415 |
| ADAM metalloproteinase with thrombospondin type 1 motif, 20                         |          |          | 0.043312 |
| transmembrane protein 117                                                           |          |          |          |
| phosphoenolpyruvate carboxykinase                                                   | 0.817422 | 1.8535   |          |
| myosin IIIB                                                                         |          |          | 2.308375 |
| G patch domain containing 2                                                         |          |          | 0.110808 |
| neuregulin 2                                                                        | 2.53598  |          |          |
| hypothetical LOC422427                                                              | 9.059916 | 2.891828 | 10.05838 |
| collagen, type I, alpha 2                                                           | 0.437284 | 0.928533 | 0.831367 |
| CAS1 domain containing 1                                                            | 0.365142 |          | 0.881012 |
| Usher syndrome 2A (autosomal recessive, mild)                                       | 0.973189 |          |          |
| Usher syndrome 2A (autosomal recessive, mild)                                       |          | 0.05483  |          |
| Usher syndrome 2A (autosomal recessive, mild)                                       | 0.941092 |          | 3.94172  |
| hypothetical protein LOC771944                                                      | 1.199035 | 1.278726 | 2.133735 |
| AT rich interactive domain 2 (ARID, RFX-like)                                       | 1.806672 | 1.05295  | 0.37305  |
| squamous cell carcinoma antigen recognized by T cells 3                             | 0.699713 | 1.000726 | 0.845179 |
| KIAA0157                                                                            | 1.347019 | 0.988031 | 2.210808 |
| Rho GTPase activating protein 11A                                                   | 1.684027 | 1.131256 | 0.5056   |
| RAS guanyl releasing protein 1 (calcium and DAG-regulated)                          | 1.489796 | 0.937198 | 2.818056 |
| centromere protein F, 350/400ka (mitotin)                                           | 1.222795 | 0.882434 | 2.713194 |
| solute carrier family 7, (cationic amino acid transporter, y+ system) member 14     |          | 14.90977 |          |
| solute carrier family 7, (cationic amino acid transporter, y+ system) member 11     |          |          |          |
| E74-like factor 2 (ets domain transcription factor)                                 | 1.307616 | 0.745428 | 0.447475 |
| centromere protein F, 350/400ka (mitotin)                                           | 0.402895 | 0.975559 | 1.130954 |
| ribosomal protein S6 kinase, 52kDa, polypeptide 1                                   | 0.959234 | 1.590668 | 0.881609 |
| feline leukemia virus subgroup C cellular receptor 1                                | 0.896835 | 1.568251 | 0.366617 |
| NSL1, MIND kinetochore complex component, homolog (S. pombe)                        | 0.847737 | 1.127998 | 0.391037 |
| similar to LOC129881 protein                                                        | 0.67382  |          |          |
| calmegin                                                                            | 0.751821 | 1.39558  | 0.250606 |
| similar to UDP-GlcNAc:alpha-1,3-D -mannoside b-1,4-N-Acetylglucosaminyl transferase | 1.994322 |          |          |
| TANK-binding kinase 1                                                               | 0.884848 | 1.392686 | 1.326156 |
| FAST kinase domains 1                                                               |          | 0.520575 | 0.638919 |
| glucosamine (N-acetyl)-6-sulfatase (Sanfilippo disease IIID)                        |          |          | 6.059769 |
| hypothetical gene supported by CR406281                                             | 0.39397  | 0.793856 | 1.759817 |

|                                                                   |          |          |          |
|-------------------------------------------------------------------|----------|----------|----------|
| similar to Calcium/calmodulin-dependent protein kinase ID /       | 0.894784 | 1.217145 | 0.140703 |
| coiled-coil domain containing 3                                   |          |          | 0.37581  |
| LEM domain containing 3                                           | 1.412217 | 0.859176 | 0.678397 |
| SERTA domain containing 4                                         | 1.758273 | 2.167024 | 2.027157 |
| synaptotagmin XIV                                                 | 0.472255 | 1.149337 | 0.48812  |
| chromosome 1 open reading frame 107                               | 4.687359 | 1.576415 | 97.20112 |
| chromosome 1 open reading frame 107                               | 0.714785 | 0.80981  | 0.717561 |
| chromosome 1 open reading frame 160                               | 0.467288 | 0.615555 | 0.679101 |
| endothelial cell adhesion molecule                                | 0.445846 |          | 6.215136 |
| KIAA1333                                                          | 1.098698 | 0.74794  | 0.278398 |
| cylindromatosis (turban tumor syndrome)                           | 0.085996 | 1.33062  |          |
| potassium voltage-gated channel, subfamily G, member 3            | 0.439772 |          |          |
| hypothetical LOC421394                                            | 0.496899 | 2.055408 |          |
| thyroid adenoma associated                                        | 1.515878 | 0.823865 | 1.489185 |
| thyroid adenoma associated                                        | 1.233437 | 1.454074 | 0.520897 |
| hypothetical protein LOC772366                                    | 0.036775 |          |          |
| ATP-binding cassette, sub-family G (WHITE), member 5 (st          | 2.227909 |          | 0.573996 |
| ATP-binding cassette, sub-family G (WHITE), member 8 (sterolin 2) |          |          | 2.125992 |
| pannexin 3                                                        |          | 0.491634 |          |
| nephronophthisis 4                                                | 0.894434 | 1.134559 | 0.700488 |
| zinc finger protein 827                                           | 0.76685  | 1.264728 | 0.402396 |
| S1 RNA binding domain 1                                           | 1.101785 | 1.044471 | 0.24406  |
| S1 RNA binding domain 1                                           | 0.511593 | 2.127723 | 0.761221 |
| Rho GTPase activating protein 5                                   | 1.691117 | 0.712776 | 0.434826 |
| KIAA0467                                                          |          | 2.005344 |          |
| protein kinase C, epsilon                                         | 0.882251 | 0.738897 | 2.116842 |
| protein kinase C, epsilon                                         | 1.032633 | 0.581204 | 1.283613 |
| hypothetical LOC423317                                            |          | 0.27759  | 1.749246 |
| KIAA0467                                                          | 0.824282 | 1.454197 | 0.994937 |
| suppressor of cytokine signaling 5                                |          |          | 0.413505 |
| transmembrane protein 34                                          | 1.607008 | 1.532645 | 0.313806 |
| tetratricopeptide repeat domain 7A                                | 0.648506 | 1.677099 | 2.048415 |
| chromosome 1 open reading frame 174                               | 0.827449 | 0.947378 | 0.409617 |
| phospholipase B1                                                  | 0.406728 |          | 2.263351 |
| suppressor of Ty 7 (S. cerevisiae)-like                           | 0.322508 | 0.697882 |          |
| DDI1, DNA-damage inducible 1, homolog 2 (S. cerevisiae)           |          | 0.17916  |          |
| lactoperoxidase                                                   | 0.471667 |          |          |
| polo-like kinase 3 (Drosophila)                                   | 1.057944 | 1.958454 | 2.729972 |
| COBW domain containing 1                                          | 0.580701 | 0.961052 | 0.453084 |
| ring finger protein 8                                             | 1.59178  | 0.949217 | 0.348642 |

|                                                              |          |          |          |
|--------------------------------------------------------------|----------|----------|----------|
| ankyrin repeat domain 15                                     | 0.442986 | 1.34103  | 0.933693 |
| doublesex and mab-3 related transcription factor 3           |          |          | 0.044639 |
| inturned planar cell polarity effector homolog (Drosophila)  | 0.756712 | 1.006395 | 0.356511 |
| similar to LOC506727 protein                                 | 2.052315 | 0.891589 | 3.019366 |
| tudor and KH domain containing                               | 0.790321 | 0.567234 | 0.155716 |
| solute carrier family 29 (nucleoside transporters), member 1 | 1.498772 | 0.911558 |          |
| heat shock 70kDa protein 4-like                              | 1.279482 | 0.862354 | 0.497814 |
| heat shock 70kDa protein 4-like                              | 1.085861 | 1.157604 | 0.309065 |
| adaptor-related protein complex 3, delta 1 subunit           | 0.983059 | 0.450072 | 0.992011 |
| zinc finger protein 410                                      | 1.114261 | 1.109374 | 0.57412  |
| similar to Polo-like kinase 4 (Drosophila)                   | 0.770947 | 0.999859 | 0.637993 |
| thyrotropin-releasing hormone degrading enzyme               | 0.043228 |          | 0.036006 |
| thyrotropin-releasing hormone degrading enzyme               |          | 13.27487 | 0.092019 |
| chromosome 4 open reading frame 29                           | 5.3817   | 0.966774 | 0.826331 |
| La ribonucleoprotein domain family, member 2                 |          |          |          |
| uroporphyrinogen decarboxylase                               | 0.690982 | 1.079317 | 1.02152  |
| GLI pathogenesis-related 1 like 2                            | 6.93792  |          |          |
| mitogen-activated protein kinase kinase 4                    | 1.221548 | 1.313792 | 0.435933 |
| ATP-binding cassette, sub-family D (ALD), member 4           | 0.979572 | 1.288287 | 0.854247 |
| myeloperoxidase                                              |          | 0.643406 | 3.125424 |
| zinc finger, DHHC-type containing 17                         | 1.189903 | 0.927547 | 0.483136 |
| collagen, type XXVIII, alpha 1                               |          | 0.772084 | 0.487294 |
| E2F transcription factor 7                                   | 0.336304 | 1.351291 | 0.157106 |
| KIAA0317                                                     |          |          | 0.192321 |
| fer-1-like 5 (C. elegans)                                    | 0.236448 |          |          |
| CCR4-NOT transcription complex, subunit 6-like               | 0.675835 | 0.789919 | 0.400884 |
| CCR4-NOT transcription complex, subunit 6-like               |          | 0.470475 |          |
| taste receptor, type 2, member 7                             | 0.723066 | 1.151206 | 0.279002 |
| phosphoinositide-3-kinase, regulatory subunit 3 (p55, gamma) | 0.814746 | 1.153885 | 0.63391  |
| phosphoinositide-3-kinase, regulatory subunit 3 (p55, gamma) | 1.201417 | 1.363848 | 0.480728 |
| hypothetical protein LOC772154                               | 0.749406 |          | 2.827537 |
| DBF4 homolog B (S. cerevisiae)                               | 0.701376 | 0.252241 | 0.800556 |
| protein O-linked mannose beta1,2-N-acetylglucosaminyltran    | 0.338468 | 1.777598 |          |
| muscleblind-like (Drosophila)                                |          | 0.7636   | 0.607499 |
| estrogen-related receptor beta                               | 1.011774 |          |          |
| G protein-coupled receptor 171                               | 2.131234 | 1.480621 | 0.860589 |
| multimerin 1                                                 |          | 0.092052 |          |
| KIAA1737                                                     |          |          | 0.145633 |
| ATP-binding cassette, sub-family C (CFTR/MRP), member        | 1.514411 | 0.71649  | 2.734328 |
| golgi autoantigen, golgin subfamily a, 1                     | 1.198821 | 0.851324 | 1.486251 |



|                                                               |          |          |          |
|---------------------------------------------------------------|----------|----------|----------|
| hypothetical protein LOC771115                                | 0.26991  | 0.924175 |          |
| protein phosphatase 2, regulatory subunit B, delta isoform    | 2.438037 | 0.926624 | 0.270895 |
| alkB, alkylation repair homolog 1 (E. coli)                   | 2.215878 | 1.44335  | 0.644464 |
| PWWP domain containing 2                                      | 1.793377 | 0.347933 |          |
| hypothetical protein LOC772154                                |          |          | 2.509254 |
| collagen, type XXV, alpha 1                                   |          | 9.650008 |          |
| latent transforming growth factor beta binding protein 1      | 0.623104 | 0.446656 | 1.536998 |
| epidermal growth factor receptor pathway substrate 15         | 0.74291  | 0.778089 | 2.622155 |
| Yip1 domain family, member 4                                  | 0.691855 | 1.198281 | 0.445622 |
| arachidonate lipoxygenase 3 /// similar to Arachidonate lipox | 2.424824 |          |          |
| TBC domain-containing protein kinase-like                     | 1.166093 | 1.296572 | 0.780269 |
| glutathione S-transferase, C-terminal domain containing       | 2.677582 | 2.59758  | 0.630356 |
| general transcription factor IIA, 1, 19/37kDa                 |          | 0.665053 | 1.210594 |
| stonin 2                                                      | 0.847028 | 1.809605 | 2.552223 |
| vitrin                                                        |          | 35.42203 |          |
| sulfotransferase family, cytosolic, 6B, member 1              |          |          | 2.120866 |
| LRP2 binding protein                                          | 2.037525 | 1.113643 | 1.192685 |
| protein kinase D3                                             | 1.052405 | 0.912713 | 0.318422 |
| protein kinase D3                                             | 1.804023 | 1.137152 | 0.612891 |
| protein tyrosine phosphatase, non-receptor type 21            | 0.946952 | 8.095678 | 0.330316 |
| zinc finger CCCH-type containing 14                           | 1.056445 | 1.39894  | 0.489976 |
| zinc finger CCCH-type containing 14                           | 1.258692 | 1.090469 | 0.591058 |
| echinoderm microtubule associated protein like 5              |          |          |          |
| storkhead box 2                                               | 1.062228 | 0.661485 | 2.165301 |
| mannosidase, alpha, class 1C, member 1                        | 0.942107 | 0.739511 | 0.418462 |
| CDKN2A interacting protein /// similar to MGC68690 protei     | 1.618183 | 0.785742 | 0.383028 |
| tetratricopeptide repeat domain 8                             | 1.039365 | 2.338129 | 1.41831  |
| forkhead box N3                                               | 0.84075  | 0.787568 |          |
| similar to hypothetical protein MGC33370                      |          |          | 0.032866 |
| zinc finger protein 238                                       | 2.27784  | 1.093391 | 0.718587 |
| transmembrane protein 106B                                    | 1.145775 | 1.116155 | 0.423515 |
| transmembrane protein 16H                                     | 0.27134  | 0.048977 | 1.781115 |
| centrosomal protein 170kDa                                    | 0.610408 | 1.074896 | 0.691829 |
| SMEK homolog 1, suppressor of mek1 (Dictyostelium)            | 0.810669 | 1.012574 | 1.207431 |
| exonuclease 1                                                 | 1.005624 | 1.681026 | 1.201649 |
| WD repeat domain 64                                           | 2.583916 |          |          |
| WD repeat domain 64                                           | 0.507819 | 8.118555 | 0.721954 |
| thyroid hormone receptor interactor 11                        | 1.429357 | 0.790374 | 0.488423 |
| F-box protein 8                                               | 0.920464 | 0.86618  | 0.472753 |
| phosphatidylinositol glycan anchor biosynthesis, class M      | 2.573132 | 0.82633  | 1.368101 |

|                                                                                                                                                                                       |          |          |          |
|---------------------------------------------------------------------------------------------------------------------------------------------------------------------------------------|----------|----------|----------|
| myotubularin related protein 4                                                                                                                                                        | 0.30935  |          |          |
| cleavage and polyadenylation specific factor 2, 100kDa                                                                                                                                | 1.308624 | 1.088122 | 0.429924 |
| acyl-CoA thioesterase 11                                                                                                                                                              |          |          | 0.037589 |
| diacylglycerol kinase, beta 90kDa                                                                                                                                                     |          |          |          |
| solute carrier family 24 (sodium/potassium/calcium exchang                                                                                                                            | 1.993903 | 1.440472 | 0.822094 |
| transmembrane protein 61                                                                                                                                                              |          |          |          |
| ryanodine receptor 2 (cardiac)                                                                                                                                                        | 1.470133 | 0.473274 |          |
| ubiquitin specific peptidase 24                                                                                                                                                       | 2.687228 | 0.865968 |          |
| WD repeat domain 17                                                                                                                                                                   | 0.227204 |          |          |
| ubiquitin specific peptidase 24                                                                                                                                                       | 0.978758 | 0.443225 | 1.551034 |
| anterior gradient homolog 3 ( <i>Xenopus laevis</i> )                                                                                                                                 | 1.328874 |          | 0.368271 |
| similar to LOC495387 protein                                                                                                                                                          |          | 10.20176 |          |
| 5-methyltetrahydrofolate-homocysteine methyltransferase                                                                                                                               | 1.424658 | 0.907031 | 0.395288 |
| ERO1-like beta ( <i>S. cerevisiae</i> )                                                                                                                                               |          | 0.649218 | 0.137417 |
| ERO1-like beta ( <i>S. cerevisiae</i> )                                                                                                                                               | 0.652168 | 1.171313 | 0.186647 |
| KIAA1409                                                                                                                                                                              | 0.320118 |          |          |
| methylenetetrahydrofolate dehydrogenase (NADP+ dependent) 2-like                                                                                                                      |          | 0.187464 | 2.446379 |
| methylenetetrahydrofolate dehydrogenase (NADP+ dependent) 2-like                                                                                                                      |          | 0.890295 | 0.40272  |
| tumor-associated calcium signal transducer 2                                                                                                                                          |          | 0.98398  | 0.48152  |
| USO1 homolog, vesicle docking protein (yeast)                                                                                                                                         | 5.284113 |          | 4.004469 |
| anthrax toxin receptor 2                                                                                                                                                              |          | 1.631272 | 0.371784 |
| anthrax toxin receptor 2                                                                                                                                                              |          |          | 1.071055 |
| fibroblast growth factor 5                                                                                                                                                            |          |          | 1.253471 |
| transmembrane protein 161B                                                                                                                                                            |          |          | 0.063136 |
| similar to RASGEF1B protein                                                                                                                                                           |          |          | 2.266707 |
| Sp4 transcription factor                                                                                                                                                              | 0.631043 | 1.075724 | 0.411951 |
| Sp4 transcription factor                                                                                                                                                              | 1.060007 | 0.548524 | 0.43171  |
| UDP-Gal:betaGlcNAc beta 1,3-galactosyltransferase, polype                                                                                                                             | 0.033446 |          |          |
| glycoprotein (transmembrane) nmb                                                                                                                                                      |          | 0.425165 |          |
| chromosome 7 open reading frame 30                                                                                                                                                    | 0.756544 | 1.070193 | 0.415783 |
| tetratricopeptide repeat domain 21B                                                                                                                                                   | 1.984615 | 0.905872 | 0.29711  |
| ubiquitin specific peptidase 1                                                                                                                                                        | 1.306037 | 1.208715 | 0.519042 |
| protein tyrosine phosphatase, receptor type, f polypeptide (PTPRF), interacting protein (liprin), serpin peptidase inhibitor, clade A (alpha-1 antiproteinase, antitrypsin), member 5 |          |          |          |
| transmembrane and tetratricopeptide repeat containing 2                                                                                                                               | 1.72709  | 1.637314 | 2.961186 |
| transmembrane and tetratricopeptide repeat containing 2                                                                                                                               | 0.904562 | 1.300664 | 1.763943 |
| membrane protein, palmitoylated 6 (MAGUK p55 subfamily                                                                                                                                | 0.750688 | 1.110254 | 1.073685 |
| oxysterol binding protein-like 3                                                                                                                                                      | 2.493775 | 0.53734  | 3.466094 |
| similar to mixed lineage kinase 4 (KIAA1804)                                                                                                                                          | 1.053632 | 0.888494 | 0.920517 |
| similar to FLJ00149 protein /// pecanex-like 2 ( <i>Drosophila</i> )                                                                                                                  | 1.068754 | 2.310109 |          |

|                                                                |          |          |          |
|----------------------------------------------------------------|----------|----------|----------|
| kelch-like 8 (Drosophila)                                      | 4.38114  | 0.689246 | 0.476641 |
| prolylcarboxypeptidase (angiotensinase C)                      |          |          | 0.009893 |
| similar to voltage-gated sodium channel type II alpha subuni   | 0.623476 | 1.130364 | 3.919329 |
| sodium channel, voltage-gated, type I, alpha subunit           |          |          | 9.8943   |
| actin-related protein T2                                       | 0.383965 | 0.714788 | 0.119486 |
| fidgetin                                                       | 6.048101 | 1.712199 | 0.35915  |
| chromosome 14 open reading frame 49                            | 0.208819 | 2.175188 |          |
| chromosome 1 open reading frame 96                             | 0.772302 | 0.983485 | 0.314205 |
| TAF5-like RNA polymerase II, p300/CBP-associated factor        | 1.571803 | 1.152185 | 0.291417 |
| UDP-N-acetyl-alpha-D-galactosamine:polypeptide N-acetylgl      | 0.618448 | 1.125171 | 1.024332 |
| component of oligomeric golgi complex 2                        | 1.925876 | 0.789829 | 0.490322 |
| WD repeat domain 78                                            |          | 3.012891 |          |
| B-cell CLL/lymphoma 11B (zinc finger protein)                  | 1.048218 | 0.952952 | 0.407364 |
| B-cell CLL/lymphoma 11B (zinc finger protein)                  | 2.050459 | 0.931465 | 0.317855 |
| THAP domain containing 9                                       | 2.137781 | 0.536854 | 1.010004 |
| chromosome 12 open reading frame 50                            |          |          |          |
| programmed cell death 2                                        | 0.995454 | 1.285176 | 0.320915 |
| hypothetical LOC422599                                         | 0.157894 |          |          |
| centrosomal protein 290kDa                                     | 2.170375 | 1.395237 | 0.887531 |
| centrosomal protein 290kDa                                     | 2.707052 |          | 0.574108 |
| echinoderm microtubule associated protein like 1               |          |          |          |
| ST3 beta-galactoside alpha-2,3-sialyltransferase 4             |          |          | 4.749721 |
| collagen-like tail subunit (single strand of homotrimer) of as | 0.582713 | 3.621925 | 0.762398 |
| collagen-like tail subunit (single strand of homotrimer) of as | 0.463961 | 0.947037 | 1.199839 |
| 2-hydroxyacyl-CoA lyase 1                                      | 1.218816 |          | 0.081068 |
| WD repeat domain 25                                            | 0.986114 | 0.908363 | 0.41301  |
| phospholipase C-like 2                                         | 2.83347  | 1.072375 | 0.327775 |
| similar to methylcrotonoyl-Coenzyme A carboxylase 2 (beta      | 1.560198 | 1.277796 | 0.641088 |
| WD repeat and FYVE domain containing 3                         | 25.40557 |          |          |
| protein phosphatase 1K (PP2C domain containing)                |          | 0.594392 | 0.038569 |
| shugoshin-like 1 (S. pombe)                                    | 0.951675 | 0.987523 | 0.40762  |
| kinesin family member 25                                       | 0.619628 | 0.184753 |          |
| N-glycanase 1                                                  | 1.133278 | 0.900051 | 0.548386 |
| N-glycanase 1                                                  | 1.316661 | 1.028817 | 0.408934 |
| N-glycanase 1                                                  | 0.457126 | 1.059222 | 1.267865 |
| plexin C1                                                      | 1.526837 | 1.350937 | 0.321689 |
| coiled-coil domain containing 41                               | 1.254181 | 0.442393 | 0.907952 |
| cysteine-rich with EGF-like domains 2                          | 1.2473   | 0.919248 | 0.506932 |
| similar to CENPJ                                               |          | 0.255214 |          |
| chromosome 1 open reading frame 173                            |          | 1.002016 | 10.3683  |

|                                                                     |          |          |          |
|---------------------------------------------------------------------|----------|----------|----------|
| WD repeat domain 20                                                 |          | 0.807737 | 0.430331 |
| chromosome 14 open reading frame 131                                | 1.231488 | 1.254235 |          |
| ring finger protein 25                                              |          |          | 0.41002  |
| zinc finger protein 142                                             | 2.036478 | 0.959398 | 1.244138 |
| similar to CENPJ                                                    |          | 0.090771 |          |
| chemokine (C-C motif) receptor 6                                    | 1.021836 | 1.426676 | 0.0827   |
| RNA binding motif, single stranded interacting protein              |          |          |          |
| malignant fibrous histiocytoma amplified sequence 1                 |          | 0.818135 | 0.252129 |
| hypothetical LOC417921                                              | 0.358769 |          |          |
| ribosomal protein S6 kinase, 90kDa, polypeptide 2                   | 2.3567   | 1.810506 | 1.315547 |
| SWI/SNF related, matrix associated, actin dependent regulat         | 0.752001 | 1.028405 | 0.372368 |
| SWI/SNF related, matrix associated, actin dependent regulat         | 0.519905 | 0.927418 | 0.074003 |
| SWI/SNF related, matrix associated, actin dependent regulat         | 0.646145 | 1.11964  | 0.427794 |
| glycerol-3-phosphate dehydrogenase 1-like                           | 0.242705 | 0.965005 | 0.433242 |
| peroxisomal trans-2-enoyl-CoA reductase                             | 0.907691 | 1.059351 | 0.934127 |
| cytochrome P450, family 27, subfamily C, polypeptide 1              | 0.349719 |          |          |
| nucleotide-binding oligomerization domain containing 1              | 0.628387 | 0.601905 | 0.409128 |
| hypothetical LOC419095                                              | 0.318708 | 0.791411 | 2.204177 |
| mex-3 homolog D (C. elegans)                                        |          |          | 0.183831 |
| calpain 7                                                           |          |          |          |
| SCY1-like 2 (S. cerevisiae)                                         |          | 45.29516 |          |
| phosphoinositide-3-kinase, regulatory subunit 4, p150               | 1.046398 | 0.96654  | 0.569377 |
| ATPase, Ca <sup>++</sup> transporting, type 2C, member 1            | 0.413685 |          |          |
| ATPase, Ca <sup>++</sup> transporting, type 2C, member 1            | 1.078394 | 1.127164 | 0.4242   |
| solute carrier family 17 (sodium-dependent inorganic phosph         | 0.062647 |          |          |
| solute carrier family 17 (sodium-dependent inorganic phosph         | 0.05155  |          |          |
| speckle-type POZ protein                                            | 1.151151 | 0.997571 | 0.309213 |
| tRNA-yW synthesizing protein 1 homolog (S. cerevisiae)              |          |          | 0.142107 |
| solute carrier family 4, sodium bicarbonate cotransporter, member 4 |          |          |          |
| copine IV                                                           | 2.034404 |          |          |
| neuropeptide FF receptor 2                                          | 0.20816  |          |          |
| ADAM metalloproteinase with thrombospondin type 1 motif, 3          |          | 0.374877 |          |
| poly(A)-specific ribonuclease (PARN)-like domain containin          | 2.607674 | 1.005614 |          |
| solute carrier family 5 (iodide transporter), member 8              | 3.717536 | 0.432715 |          |
| solute carrier family 5 (iodide transporter), member 8              |          | 2.298093 |          |
| transcription factor CP2-like 1                                     | 0.049514 |          |          |
| UTP20, small subunit (SSU) processome component, homol              | 0.285849 |          |          |
| KIAA0284                                                            |          |          | 0.24432  |
| phospholipase D family, member 4                                    | 1.582257 | 0.612502 | 0.135982 |
| phospholipase D family, member 4                                    | 1.726942 | 0.72728  | 0.088293 |

|                                                                                     |          |          |          |
|-------------------------------------------------------------------------------------|----------|----------|----------|
| ATG9 autophagy related 9 homolog A (S. cerevisiae)                                  | 1.097517 | 0.828683 | 2.107453 |
| acid phosphatase, prostate                                                          | 0.635209 | 0.46304  |          |
| nucleoporin 205kDa                                                                  | 0.711597 | 1.013866 | 0.500634 |
| syntaxin 11                                                                         |          | 10.04504 |          |
| syntaxin 11                                                                         | 1.415927 | 0.911045 |          |
| cleavage stimulation factor, 3' pre-RNA, subunit 3, 77kDa                           | 1.45375  | 1.079088 | 0.676945 |
| coiled-coil domain containing 14                                                    | 1.61744  | 1.314299 | 0.4974   |
| dynein, axonemal, heavy chain 9                                                     |          | 1.275564 | 0.269669 |
| chemokine (C-C motif) receptor 2                                                    | 0.048539 |          |          |
| chemokine (C motif) receptor 1                                                      |          |          | 0.051902 |
| chemokine (C motif) receptor 1                                                      | 1.142893 |          | 0.022021 |
| FYVE and coiled-coil domain containing 1                                            |          | 1.433201 |          |
| FYVE and coiled-coil domain containing 1                                            |          | 0.711669 |          |
| hypothetical protein LOC769813                                                      | 1.700288 | 1.452814 |          |
| UDP glucuronosyltransferase 2 family, polypeptide A3                                |          |          | 5.450598 |
| sphingosine-1-phosphate phosphatase 1                                               | 0.279185 | 0.930355 | 0.898702 |
| spermatogenesis associated 5                                                        | 1.208296 | 1.082718 | 0.491439 |
| guanylate cyclase 2C (heat stable enterotoxin receptor)                             | 5.905048 |          | 1.65134  |
| guanylate cyclase 2C (heat stable enterotoxin receptor)                             | 0.568264 | 0.820437 | 1.586054 |
| KIAA1109                                                                            | 1.172593 |          |          |
| KIAA1109                                                                            | 0.448966 | 0.939465 | 2.922113 |
| KIAA1109                                                                            | 0.696836 | 0.907448 | 2.848758 |
| CUB domain containing protein 1                                                     | 1.453922 | 0.637997 | 1.968666 |
| protein kinase C, eta                                                               |          |          | 0.452855 |
| solute carrier family 38, member 6                                                  | 0.744301 | 1.688969 | 3.078948 |
| unc-51-like kinase 4 (C. elegans)                                                   |          | 1.220373 | 0.460233 |
| septin 3                                                                            | 0.535515 | 0.429725 | 0.464039 |
| meiosis inhibitor 1                                                                 | 0.587699 |          | 0.477197 |
| similar to Alpha-2-macroglobulin precursor (Alpha-2-M)                              | 0.156965 |          |          |
| solute carrier family 25, member 38                                                 |          |          |          |
| chemokine (C-X3-C motif) receptor 1                                                 |          |          | 2.38812  |
| chemokine (C-X3-C motif) receptor 1                                                 | 2.318821 | 1.577389 | 2.590771 |
| TNFAIP3 interacting protein 3                                                       | 0.065927 |          |          |
| transducer of ERBB2, 2                                                              |          | 0.699879 | 0.288081 |
| chemokine (C-C motif) receptor 4                                                    | 0.267721 | 1.107388 | 0.275887 |
| TNFAIP3 interacting protein 3                                                       | 2.005986 |          | 1.100788 |
| similar to protocadherin beta 20 /// hypothetical protein LOC776078 /// protocadher |          |          | 0.209761 |
| G protein-coupled receptor 114                                                      | 1.058466 | 0.761225 | 2.131852 |
| cytoplasmic linker associated protein 2                                             | 0.225047 | 0.411483 | 0.591387 |
| megakaryoblastic leukemia (translocation) 1                                         | 0.766569 | 1.049827 | 2.307085 |

|                                                                     |          |          |          |
|---------------------------------------------------------------------|----------|----------|----------|
| glutamine and serine rich 1                                         |          | 1.178493 | 0.717616 |
| AT rich interactive domain 4A (RBP1-like)                           | 1.283578 | 0.982539 | 0.448719 |
| La ribonucleoprotein domain family, member 7                        | 0.906302 | 0.959702 | 0.430187 |
| doublecortin-like kinase 3                                          |          |          | 0.292421 |
| GRB2-related adaptor protein 2                                      | 1.219156 | 0.696201 | 0.130009 |
| lupus brain antigen 1                                               | 1.484446 |          | 6.074037 |
| Similar to Poly [ADP-ribose] polymerase 14 (PARP-14) (B             | 2.337955 | 1.740638 | 1.621042 |
| poly (ADP-ribose) polymerase family, member 14                      | 3.773962 | 1.786804 | 1.960749 |
| TRAF-interacting protein with forkhead-associated domain            |          | 0.759803 | 0.103311 |
| TRAF-interacting protein with forkhead-associated domain            | 1.539305 | 0.699176 | 1.483588 |
| poly (ADP-ribose) polymerase family, member 9                       | 2.89319  | 2.145787 | 1.903398 |
| chromosome 4 open reading frame 16                                  | 0.730861 | 1.310632 | 2.007931 |
| chromosome 4 open reading frame 16                                  | 0.620113 | 0.836221 | 0.353121 |
| G protein-coupled receptor 141                                      |          | 1.119012 |          |
| similar to Chromosome 4 open reading frame 32                       | 0.661719 | 0.909053 | 0.402129 |
| family with sequence similarity 62 (C2 domain containing), 1        | 0.481641 |          |          |
| family with sequence similarity 62 (C2 domain containing), member C |          |          |          |
| coiled-coil domain containing 73                                    | 0.963028 | 2.391485 | 1.544269 |
| acyloxyacyl hydrolase (neutrophil)                                  | 2.055507 | 2.440246 | 3.553998 |
| engrailed homeobox 1                                                | 1.684434 |          | 1.541508 |
| elongation protein 4 homolog (S. cerevisiae)                        | 2.01355  | 1.326903 | 0.259751 |
| HERPUD family member 2                                              | 0.962739 | 1.098091 | 0.41821  |
| lin-7 homolog C (C. elegans)                                        | 0.517065 | 0.974357 | 0.348552 |
| Bardet-Biedl syndrome 9                                             | 0.717179 | 0.674733 | 1.00728  |
| aminocarboxymuconate semialdehyde decarboxylase                     |          | 0.427966 |          |
| zinc finger, RAN-binding domain containing 3                        | 0.549909 | 1.015717 | 0.508504 |
| phosphodiesterase 1C, calmodulin-dependent 70kDa                    | 1.984142 | 1.294526 | 1.962064 |
| chromosome 14 open reading frame 104                                | 0.662287 | 0.812515 | 4.170044 |
| utrophin                                                            | 1.032103 |          | 0.41685  |
| Williams-Beuren syndrome chromosome region 16                       | 1.626146 | 0.963817 | 0.345916 |
| similar to serologically defined colon cancer antigen 3             | 0.321832 |          |          |
| golgi autoantigen, golgin subfamily a, 4                            | 1.291145 | 0.637057 | 0.57978  |
| transmembrane protein 184B                                          | 0.343079 |          |          |
| L-2-hydroxyglutarate dehydrogenase                                  |          | 0.332327 |          |
| SNF2 histone linker PHD RING helicase                               | 2.002954 | 0.798845 | 0.655533 |
| cyclin-dependent kinase-like 1 (CDC2-related kinase)                | 2.534554 | 1.540618 | 0.392216 |
| solute carrier family 39 (zinc transporter), member 8               |          | 1.535983 | 2.177044 |
| chromosome 6 open reading frame 103                                 | 4.248219 |          |          |
| chromosome 6 open reading frame 103                                 | 0.959562 |          | 2.137985 |
| mitogen-activated protein kinase kinase kinase 5                    | 1.29734  | 0.45508  | 1.627675 |

|                                                                            |          |          |          |
|----------------------------------------------------------------------------|----------|----------|----------|
| chromosome 7 open reading frame 10                                         |          | 0.659601 | 0.925123 |
| uronyl-2-sulfotransferase                                                  | 5.189391 |          |          |
| HECT, C2 and WW domain containing E3 ubiquitin protein                     | 1.160023 | 0.498701 | 0.092919 |
| HECT, C2 and WW domain containing E3 ubiquitin protein                     | 1.039265 | 0.597668 | 0.086605 |
| tudor domain containing 7                                                  | 0.992685 | 1.328651 | 2.535779 |
| serine/threonine kinase 17a                                                | 1.089512 | 0.853253 | 0.329858 |
| FERM domain containing 6                                                   |          |          | 2.782772 |
| neurexophilin 2                                                            | 0.297058 |          | 2.024195 |
| hypothetical LOC424300                                                     | 0.4927   |          |          |
| nidogen 2 (osteonidogen)                                                   | 14.46408 | 1.511729 | 1.901892 |
| G protein-coupled receptor 137C                                            | 0.622711 | 1.52792  | 0.150862 |
| low density lipoprotein-related protein 1B (deleted in tumors)             |          |          | 2.012867 |
| debranching enzyme homolog 1 (S. cerevisiae)                               | 1.466779 | 0.994818 | 0.426642 |
| methylenetetrahydrofolate dehydrogenase (NADP+ depende                     | 0.03041  |          |          |
| similar to IP4/PIP3 binding protein-like protein                           | 18.49684 |          |          |
| DDHD domain containing 1                                                   | 0.25169  | 0.815383 |          |
| extracellular leucine-rich repeat and fibronectin type III cont            | 1.677686 | 0.379556 |          |
| chromosome 14 open reading frame 106                                       | 1.314685 | 0.795945 | 0.751762 |
| enhancer of polycomb homolog 2 (Drosophila)                                | 1.546413 | 1.09492  | 0.396168 |
| eukaryotic translation initiation factor 2B, subunit 4 delta, 67           | 1.120255 | 1.122902 | 2.590456 |
| transmembrane protease, serine 6                                           | 12.8486  |          | 1.569928 |
| RNA binding motif protein 43                                               | 3.755623 |          | 0.897449 |
| transmembrane protease, serine 6                                           | 2.502885 | 0.873517 |          |
| solute carrier family 12 (potassium/chloride transporters), me             | 1.297415 | 0.71559  | 0.337945 |
| CD1c molecule                                                              | 0.90184  |          | 0.118933 |
| bromodomain containing 9                                                   | 1.386546 | 1.29485  | 0.179425 |
| solute carrier family 9 (sodium/hydrogen exchanger), member 3              |          |          |          |
| formin-like 2                                                              |          |          | 2.700148 |
| collagen, type XV, alpha 1                                                 |          | 0.371933 |          |
| nuclear receptor subfamily 4, group A, member 2                            | 25.56608 |          | 0.31455  |
| chromosome 16 open reading frame 48                                        |          | 1.100106 | 3.176136 |
| transducin-like enhancer of split 1 (E(sp1) homolog, Drosopl               | 0.382819 | 1.109089 | 1.394595 |
| membrane-associated ring finger (C3HC4) 7                                  | 0.93772  | 1.063359 | 0.407316 |
| solute carrier family 28 (sodium-coupled nucleoside transporter), member 3 |          |          | 0.187884 |
| ATP/GTP binding protein 1                                                  | 0.619506 | 0.606948 | 3.066929 |
| phospholipase C, eta 2                                                     | 2.182313 |          | 1.528661 |
| chromosome 22 open reading frame 28                                        | 1.050999 | 0.897552 | 0.481056 |
| Fanconi anemia, complementation group C                                    | 0.975595 | 0.934527 | 0.708701 |
| reversion-inducing-cysteine-rich protein with kazal motifs                 | 1.488002 | 1.364206 | 0.194034 |
| tumor protein p53 inducible nuclear protein 2                              | 0.379849 | 1.224447 | 1.44463  |

|                                                                             |          |          |          |
|-----------------------------------------------------------------------------|----------|----------|----------|
| resistance to inhibitors of cholinesterase 8 homolog B (C. ele              | 1.644638 | 1.110206 | 0.313446 |
| ATPase, class II, type 9B                                                   | 0.6483   | 2.508116 | 1.102591 |
| aldehyde dehydrogenase 5 family, member A1 (succinate-se                    | 1.636677 | 0.212313 |          |
| aldehyde dehydrogenase 5 family, member A1 (succinate-se                    | 2.958103 | 0.469039 |          |
| hypothetical protein LOC771624                                              | 1.143753 | 1.484768 | 3.320515 |
| similar to Doublecortin domain containing 2a                                | 0.717085 | 0.364109 | 0.716584 |
| kinesin family member 13A                                                   |          |          |          |
| aldehyde dehydrogenase 1 family, member L2                                  | 19.47454 |          |          |
| chromosome 12 open reading frame 45                                         |          | 1.026245 | 0.394296 |
| RAN binding protein 9                                                       |          |          |          |
| RAN binding protein 9                                                       | 1.797513 | 0.733294 | 0.711518 |
| coiled-coil domain containing 90A                                           | 0.934457 | 1.187532 | 0.393414 |
| guanosine monophosphate reductase                                           | 2.11412  | 0.882639 | 0.796636 |
| 5'-nucleotidase domain containing 3                                         | 1.046387 |          | 3.002535 |
| human immunodeficiency virus type I enhancer binding prot                   | 0.993123 | 1.204321 | 0.362367 |
| ADAM metalloproteinase domain 12 (meltrin alpha)                            |          |          |          |
| chromosome 12 open reading frame 48                                         | 1.248086 | 1.038285 | 0.264114 |
| N-acetylglucosamine-1-phosphate transferase, alpha and bet                  | 0.92228  | 0.683517 | 0.236505 |
| synaptonemal complex protein 3                                              | 0.757276 | 1.458124 | 0.109452 |
| similar to MGC82474 protein                                                 | 1.614284 | 2.787877 | 2.939536 |
| ubiquitin protein ligase E3 component n-recognin 4                          | 3.732041 | 2.12546  |          |
| poly (ADP-ribose) polymerase family, member 12                              | 0.066562 |          |          |
| thromboxane A synthase 1 (platelet, cytochrome P450, family 5, subfamily A) |          |          |          |
| ATPase, H <sup>+</sup> transporting, lysosomal V0 subunit a4                | 0.042424 |          |          |
| SVOP-like                                                                   |          | 0.044321 |          |
| chromosome 6 open reading frame 85                                          | 1.474291 | 2.073932 | 0.892614 |
| exocyst complex component 2                                                 | 1.118282 | 0.933522 | 0.414721 |
| hypothetical LOC418108                                                      | 1.87923  | 2.316677 | 2.601978 |
| aarF domain containing kinase 2                                             | 1.956075 | 0.709346 | 0.788714 |
| serpin peptidase inhibitor, clade B (ovalbumin), member 1                   | 1.313694 | 2.232017 | 0.862637 |
| serpin peptidase inhibitor, clade B (ovalbumin), member 5                   | 1.636632 | 1.039036 | 0.421586 |
| hypothetical LOC429942                                                      |          |          |          |
| FYVE, RhoGEF and PH domain containing 4                                     | 0.997174 | 2.045763 | 1.666292 |
| membrane-associated ring finger (C3HC4) 11                                  | 3.483815 |          |          |
| hypothetical protein LOC769855                                              | 0.621012 | 0.667729 | 0.337392 |
| WAS protein family homolog 2 pseudogene                                     |          | 1.258643 | 0.027336 |
| chromosome 6 open reading frame 98                                          | 1.034662 | 0.957814 | 1.078551 |
| solute carrier family 6 (neurotransmitter transporter, GABA), member 13     |          |          | 0.105631 |
| WNK lysine deficient protein kinase 1                                       | 0.793054 | 4.562095 |          |
| ankyrin repeat domain 33B                                                   | 1.051793 | 0.381679 | 0.263448 |



|                                                               |          |          |          |
|---------------------------------------------------------------|----------|----------|----------|
| interleukin 17 receptor A                                     | 1.249967 | 1.373071 | 0.06856  |
| SH3-binding domain kinase family, member 2                    | 0.473653 |          |          |
| chaperonin containing TCP1, subunit 5 (epsilon)               | 0.892716 | 1.427957 | 0.68396  |
| hypothetical LOC425916                                        | 0.816059 | 1.176248 | 0.445938 |
| hypothetical LOC425916                                        | 0.83464  | 1.372343 | 0.431699 |
| hypothetical LOC426958                                        | 0.975349 | 0.530913 | 2.150025 |
| similar to ABC A13                                            |          |          |          |
| fidgetin-like 1                                               |          | 0.473764 |          |
| epidermal growth factor receptor pathway substrate 8          | 8.789858 |          |          |
| dopa decarboxylase (aromatic L-amino acid decarboxylase)      | 0.391151 | 1.341488 |          |
| chromodomain helicase DNA binding protein 2                   |          |          | 2.140184 |
| growth factor receptor-bound protein 10                       | 2.193025 |          | 3.205449 |
| growth factor receptor-bound protein 10                       | 2.996455 |          | 3.957242 |
| hypothetical LOC430359                                        |          |          | 2.227238 |
| phosphoinositide-3-kinase, class 2, gamma polypeptide         | 2.314563 |          |          |
| phospholipase C, zeta 1                                       | 0.253456 |          | 0.17558  |
| capping protein (actin filament) muscle Z-line, alpha 3       |          | 2.042528 |          |
| chromosome 18 open reading frame 37                           | 0.938678 | 0.838968 | 0.643281 |
| chromosome 9 open reading frame 5                             | 1.645769 | 0.533627 | 0.717028 |
| molybdenum cofactor sulfurase                                 |          |          |          |
| tubulin, gamma complex associated protein 6                   | 0.821077 | 0.907487 | 0.471745 |
| solute carrier organic anion transporter family, member 1A2   | 0.45725  |          | 1.286326 |
| solute carrier family 6 (neutral amino acid transporter), mem | 1.385082 | 3.172152 | 1.968958 |
| solute carrier family 6 (neutral amino acid transporter), mem | 0.934118 |          | 0.475455 |
| GRAM domain containing 4 /// similar to KIAA0767 protein      |          |          | 19.18834 |
| GRAM domain containing 4 /// similar to KIAA0767 protein      | 1.230088 | 1.19609  | 2.1765   |
| gamma-aminobutyric acid (GABA) B receptor, 2                  | 0.367487 | 4.754447 | 1.328587 |
| centromere protein E, 312kDa                                  | 0.937739 | 0.839802 | 0.475832 |
| complement component 3a receptor 1                            | 2.817015 | 1.080969 | 0.708502 |
| similar to alternate SOS1                                     | 2.663939 | 0.663367 | 1.509091 |
| hypothetical LOC427933                                        | 1.566462 | 10.38806 | 1.204568 |
| pyruvate dehydrogenase kinase, isozyme 1                      | 1.143462 | 0.750884 | 0.315569 |
| hypothetical LOC425987                                        | 1.067794 | 2.107066 | 4.488675 |
| mitogen-activated protein kinase kinase 2                     | 0.734394 | 1.106814 | 2.544209 |
| centrosomal protein 152kDa                                    | 1.14726  | 0.781151 | 0.383017 |
| Dmx-like 2 /// similar to rabconnectin                        | 2.676605 | 0.812738 | 0.629788 |
| solute carrier family 5 (sodium/glucose cotransporter), mem1  | 5.351162 |          |          |
| GEM interacting protein                                       | 1.207283 | 1.587794 | 0.238846 |
| GEM interacting protein                                       |          | 9.016928 |          |
| SECIS binding protein 2-like                                  | 1.038638 | 0.895407 | 0.294697 |

|                                                                                             |          |          |          |
|---------------------------------------------------------------------------------------------|----------|----------|----------|
| SECIS binding protein 2-like                                                                | 1.548342 | 0.811658 | 0.219009 |
| similar to T-cell receptor alpha chain V domain 1 /// similar to                            | 0.672911 | 0.913367 | 0.405611 |
| OTU domain containing 7B                                                                    | 0.480918 |          |          |
| phosducin-like                                                                              | 0.737893 | 0.933072 | 0.468121 |
| LMBR1 domain containing 2                                                                   | 0.459751 | 0.794096 | 0.695676 |
| similar to ligase I                                                                         | 1.403854 | 1.429361 | 1.410012 |
| insulin-degrading enzyme                                                                    |          | 0.958131 | 0.151841 |
| insulin-degrading enzyme                                                                    | 0.937853 | 1.270716 | 0.711755 |
| hypothetical protein LOC772153                                                              |          | 2.650599 |          |
| chromosome 9 open reading frame 98                                                          |          | 9.561112 |          |
| similar to immunoglobulin-like receptor CHIR-B3 /// similar to immunoglobulin-like receptor |          |          |          |
| stromal antigen 1                                                                           | 2.675778 | 0.742173 | 0.355722 |
| pre-B-cell leukemia homeobox 4                                                              | 1.690285 | 0.816367 | 2.044077 |
| proteasome C1 subunit                                                                       | 0.32224  | 1.076375 | 0.501638 |
| sorbin and SH3 domain containing 2                                                          | 0.900148 | 1.032018 | 0.739349 |
| similar to zinc finger protein                                                              | 1.165309 | 0.695017 | 0.252955 |
| par-3 partitioning defective 3 homolog B (C. elegans)                                       |          |          | 0.3044   |
| par-3 partitioning defective 3 homolog B (C. elegans)                                       | 1.608304 | 1.169635 | 2.983514 |
| thioredoxin domain containing 4 (endoplasmic reticulum)                                     | 1.088839 | 1.173438 | 0.478072 |
| pleckstrin homology domain containing, family O member 1                                    |          | 1.098791 | 1.020182 |
| toll-like receptor 3                                                                        | 3.807834 | 1.09327  |          |
| similar to PDZ domain-containing guanine nucleotide exch                                    | 1.572948 | 0.830548 | 0.42538  |
| similar to PDZ domain-containing guanine nucleotide exch                                    | 1.645539 | 0.847133 | 0.729131 |
| S100 calcium binding protein A13                                                            | 0.802031 | 1.332536 | 2.193181 |
| CAP-GLY domain containing linker protein 2                                                  |          |          | 3.092932 |
| coiled-coil domain containing 82                                                            | 1.771606 | 0.866636 | 0.38227  |
| centromere protein N                                                                        | 0.800206 | 2.029366 | 0.580691 |
| cancer susceptibility candidate 3                                                           |          | 1.500853 | 0.422921 |
| hypothetical LOC429920 /// hypothetical LOC429942 /// hypothetical LOC430285 /// hypothet   |          |          |          |
| granzyme K (granzyme 3; tryptase II)                                                        | 3.202441 | 3.18188  | 8.21312  |
| cell division cycle 20 homolog B (S. cerevisiae)                                            |          |          | 6.065487 |
| similar to Chromosome 5 open reading frame 5                                                | 2.025507 |          |          |
| coagulation factor XI                                                                       | 7.763533 |          |          |
| FAT tumor suppressor homolog 1 (Drosophila)                                                 | 0.832698 | 0.724256 | 0.390127 |
| CAP-GLY domain containing linker protein 2                                                  | 2.153958 |          |          |
| FSHD region gene 1                                                                          | 1.002181 | 1.026634 | 0.448322 |
| chromosome 6 open reading frame 98                                                          | 1.196846 |          | 0.288558 |
| myc target 1                                                                                | 3.244276 |          | 2.519544 |
| similar to opioid receptor B                                                                | 0.42431  | 0.835422 | 0.028309 |
| CNKSR family member 3                                                                       | 1.3223   | 3.080189 | 1.556532 |

|                                                              |          |          |          |
|--------------------------------------------------------------|----------|----------|----------|
| chromosome 6 open reading frame 62                           | 1.305496 | 0.558584 | 0.487902 |
| paroxysmal nonkinesigenic dyskinesia                         |          |          |          |
| claudin 20                                                   |          | 1.520543 | 0.080055 |
| zinc finger protein 236                                      | 0.366898 | 0.474698 | 0.098059 |
| zinc finger protein 236                                      | 1.281306 | 0.151092 | 0.26042  |
| zinc finger protein 236                                      |          | 0.347204 | 0.34825  |
| C-type lectin domain family 2, member B /// C-type lectin dc | 0.425516 | 0.64762  |          |
| similar to Autoimmune regulator (Autoimmune polyendocrii     | 1.142853 | 1.02402  | 0.404723 |
| NADPH oxidase 3                                              | 0.743153 | 2.284312 |          |
| chromosome 10 open reading frame 137                         | 0.926    | 0.451514 | 0.398258 |
| chromosome 10 open reading frame 137                         | 0.631621 | 1.979277 | 0.489395 |
| deleted in liver cancer 1                                    | 0.643901 | 0.840039 | 3.438225 |
| hypothetical protein LOC771735                               |          |          | 2.012716 |
| zinc finger, DHHC-type containing 14                         | 0.91913  | 0.457367 |          |
| zinc finger, DHHC-type containing 14                         | 1.40223  | 0.864718 | 0.938338 |
| CNDP dipeptidase 2 (metallopeptidase M20 family)             | 0.935858 | 1.096801 | 0.440687 |
| chromosome 18 open reading frame 51                          | 0.332532 | 1.135295 | 0.297742 |
| pecanex homolog (Drosophila)                                 | 0.60674  | 0.557342 | 0.275558 |
| hypothetical protein LOC770831                               | 1.297212 | 3.085285 | 1.364458 |
| deleted in liver cancer 1                                    | 1.464682 | 0.946695 | 4.468535 |
| PR domain containing 2, with ZNF domain                      |          | 1.083268 | 2.043558 |
| tRNA selenocysteine associated protein 1                     | 0.875513 | 1.022418 | 0.432151 |
| LON peptidase N-terminal domain and ring finger 1            | 0.403703 | 0.926898 | 0.753542 |
| cerebellin 2 precursor                                       | 0.456503 | 1.174872 | 5.670957 |
| ectonucleotide pyrophosphatase/phosphodiesterase 7           |          | 2.810009 |          |
| similar to FKSG15                                            | 2.014437 | 1.222474 | 0.861378 |
| CD226 molecule                                               | 1.593905 | 0.812078 | 0.175529 |
| synaptosomal-associated protein, 29kDa                       | 1.232229 | 0.91972  | 0.394608 |
| similar to PRDM15 protein                                    |          | 2.518736 | 0.051412 |
| docking protein 6                                            | 0.778073 | 0.440063 | 0.48115  |
| glutamine-fructose-6-phosphate transaminase 2 /// hypothetic | 1.458452 |          | 3.53995  |
| galactokinase 2                                              | 1.214324 | 2.242266 | 0.607971 |
| similar to olfactory receptor MOR146-3                       |          | 0.391884 |          |
| human immunodeficiency virus type I enhancer binding prot    | 0.653162 | 0.76739  |          |
| hypothetical protein LOC768893                               | 1.884756 | 0.527508 | 0.626885 |
| inositol(myo)-1(or 4)-monophosphatase 2                      | 2.815686 | 1.070432 | 0.999596 |
| transportin 3                                                | 0.711995 | 2.000241 | 0.65267  |
| prostaglandin-endoperoxide synthase 1 (prostaglandin G/H s   | 9.192511 | 2.267725 | 1.195562 |
| solute carrier family 35, member D3                          |          |          |          |
| COX10 homolog, cytochrome c oxidase assembly protein, h      | 0.059708 | 0.836288 |          |

|                                                                                       |          |          |          |
|---------------------------------------------------------------------------------------|----------|----------|----------|
| RNA (guanine-7-) methyltransferase                                                    | 0.824449 | 0.935526 | 0.70708  |
| melanocortin 2 receptor (adrenocorticotrophic hormone)                                |          |          | 0.242588 |
| similar to Meiosis-specific nuclear structural 1 /// similar to 1                     | 1.296098 | 1.260636 | 2.509787 |
| vacuolar protein sorting 45 homolog (S. cerevisiae)                                   | 1.113726 | 0.813098 | 2.113655 |
| GTPase, IMAP family member 1                                                          |          | 0.867671 | 2.187414 |
| hypothetical LOC421690                                                                | 0.483149 |          | 0.424905 |
| similar to protein tyrosine phosphatase, receptor type, M                             |          | 2.128796 | 1.05688  |
| similar to protein tyrosine phosphatase, receptor type, M /// similar to Ptpm protein |          |          |          |
| suppressor of variegation 3-9 homolog 2 (Drosophila)                                  | 0.644822 | 1.055157 | 0.419642 |
| sec1 family domain containing 2                                                       |          |          | 0.346976 |
| family with sequence similarity 38, member B                                          |          |          |          |
| guanine nucleotide binding protein (G protein), gamma 4                               | 3.072972 | 2.370613 | 0.858113 |
| quinoid dihydropteridine reductase                                                    | 0.677017 | 0.900392 | 0.33748  |
| vanin 1 /// vanin 1                                                                   | 4.351387 | 1.231482 | 1.918582 |
| trace amine associated receptor 1                                                     | 0.541707 |          | 2.277226 |
| zinc finger and BTB domain containing 44                                              | 0.553803 | 1.010384 | 0.350355 |
| similar to immunoglobulin-like receptor CHIR-A2                                       |          | 0.49112  | 1.901159 |
| similar to immunoglobulin-like receptor CHIR-A2                                       |          |          |          |
| erythrocyte membrane protein band 4.1-like 2                                          | 0.808739 | 0.756399 | 1.059688 |
| l(3)mbt-like 3 (Drosophila)                                                           |          | 0.75424  | 2.262695 |
| lymphoid-restricted membrane protein                                                  | 1.260147 | 1.002641 | 0.303337 |
| Rho GTPase activating protein 18                                                      |          |          |          |
| DnaJ (Hsp40) homolog, subfamily B, member 14                                          |          | 0.0511   |          |
| DnaJ (Hsp40) homolog, subfamily B, member 14                                          | 1.432147 | 0.874252 | 0.496691 |
| cancer susceptibility candidate 1                                                     | 1.100263 | 1.429018 | 1.166815 |
| similar to Serine/threonine kinase 3 (STE20 homolog, yeast)                           | 1.255196 | 0.6765   | 0.285897 |
| KIAA0802                                                                              |          | 0.046945 |          |
| hypothetical LOC422763                                                                | 2.502126 | 0.787426 | 1.685571 |
| similar to KIAA0896 protein                                                           | 1.199537 | 1.492465 | 2.862567 |
| hypothetical LOC419599                                                                | 5.060207 | 2.179323 | 2.277715 |
| TXK tyrosine kinase                                                                   | 2.057835 | 0.530073 | 1.672819 |
| similar to RanBP2 (Ran-binding protein 2) /// similar to Ranl                         | 0.684632 | 1.573745 | 0.974141 |
| similar to Ran-binding protein 2 /// similar to RanBP2 (Ran-l                         | 0.409084 |          |          |
| NIPA-like domain containing 1                                                         | 2.631095 | 1.393734 | 0.142605 |
| hypothetical protein LOC769475                                                        | 0.85204  | 3.730691 |          |
| hypothetical protein LOC776064                                                        |          | 9.74717  |          |
| MANSC domain containing 1                                                             | 0.635309 | 2.453348 | 1.630869 |
| tubulin tyrosine ligase-like family, member 1                                         | 0.848623 | 1.066725 | 1.430065 |
| cell cycle associated protein 1                                                       | 0.481965 | 1.10907  | 1.036694 |
| ATPase, class V, type 10D                                                             | 3.303807 | 3.6044   | 0.222837 |

|                                                                        |          |          |          |
|------------------------------------------------------------------------|----------|----------|----------|
| ATPase, class V, type 10D                                              |          | 0.09646  | 0.663584 |
| parvin, gamma                                                          | 0.314249 | 0.668817 | 0.116197 |
| parvin, gamma                                                          | 1.086508 | 1.224227 | 0.247153 |
| glucosamine-6-phosphate deaminase 2                                    | 1.088711 | 1.28084  | 0.34937  |
| EF-hand calcium binding domain 4B                                      | 11.42166 |          |          |
| zinc finger protein 250                                                | 0.70662  | 1.111441 | 0.302543 |
| ataxin 10                                                              | 0.646523 | 1.324643 | 0.400099 |
| ATPase, aminophospholipid transporter (APLT), class I, type 1          | 11.93369 |          |          |
| ATPase, aminophospholipid transporter (APLT), class I, type 1          | 11.16751 | 0.988005 | 2.590365 |
| similar to LOC150383 protein                                           | 1.105576 | 1.699668 | 1.478162 |
| coiled-coil domain containing 4                                        | 0.847995 | 1.30057  | 0.288066 |
| alpha-2-macroglobulin                                                  |          |          | 3.059321 |
| amyloid beta (A4) precursor protein-binding, family B, member 2 (Fe65) | 26.82589 |          |          |
| RNA binding motif protein 47                                           | 1.628494 | 0.814373 | 0.480485 |
| ras homolog gene family, member H                                      |          | 1.04908  | 0.261304 |
| NAD kinase                                                             | 2.869074 | 0.336029 | 0.176406 |
| NmrA-like family domain containing 1                                   | 1.573515 |          | 0.051589 |
| UDP-glucose dehydrogenase                                              | 0.722564 | 1.566941 | 0.268344 |
| ADP-ribosylation factor-like 2 binding protein                         | 0.67417  | 0.356066 | 0.7164   |
| integrin alpha FG-GAP repeat containing 2                              | 0.998008 | 0.71821  | 0.392338 |
| RELT-like 1                                                            | 1.60103  | 1.366531 | 0.395859 |
| centaurin, delta 1                                                     | 1.263692 | 0.792452 | 0.212823 |
| hypothetical LOC426508 /// hypothetical protein LOC77672               | 3.546787 |          |          |
| stromal interaction molecule 2                                         | 1.649585 | 1.14822  | 1.063734 |
| R3H domain containing 2                                                |          |          |          |
| MYB binding protein (P160) 1a                                          | 0.87136  | 1.209386 | 1.541154 |
| mannosidase, alpha, class 1A, member 2                                 | 1.104911 | 0.985958 | 0.328732 |
| mannosidase, alpha, class 1A, member 2                                 |          | 2.342056 |          |
| cholecystokinin A receptor                                             | 0.692175 |          |          |
| cholecystokinin A receptor                                             | 0.127342 |          |          |
| apolipoprotein A-V                                                     | 0.451377 |          |          |
| lectin, galactoside-binding, soluble, 8 (galectin 8)                   |          | 0.279785 |          |
| lectin, galactoside-binding, soluble, 8 (galectin 8)                   | 1.822148 | 0.757959 | 0.191412 |
| lectin, galactoside-binding, soluble, 8 (galectin 8)                   | 1.72543  | 0.100605 | 0.33686  |
| lectin, galactoside-binding, soluble, 8 (galectin 8)                   | 2.889066 | 1.356706 | 0.347724 |
| Sep (O-phosphoserine) tRNA:Sec (selenocysteine) tRNA synthetase        | 0.63723  | 1.492113 | 1.501702 |
| peroxisome proliferator-activated receptor gamma, coactivator 1 alpha  |          |          | 0.110387 |
| similar to GT334 protein                                               | 1.397173 | 0.452217 | 0.905814 |
| calcium-sensing receptor                                               |          |          | 0.046864 |
| heparan sulfate (glucosamine) 3-O-sulfotransferase 3A1 /// s           | 0.69908  | 3.060199 | 4.348557 |

|                                                              |          |          |          |
|--------------------------------------------------------------|----------|----------|----------|
| non-SMC condensin I complex, subunit G                       | 0.681481 | 1.421236 | 0.14848  |
| DEAH (Asp-Glu-Ala-His) box polypeptide 32                    |          | 4.62016  |          |
| family with sequence similarity 46, member C                 | 1.418064 |          | 1.496357 |
| chromodomain helicase DNA binding protein 4 /// hypothetical | 0.96746  | 1.302756 | 0.699316 |
| chromodomain helicase DNA binding protein 4 /// hypothetical | 0.622018 |          | 0.742733 |
| G protein-coupled receptor 92                                |          | 13.06592 |          |
| G protein-coupled receptor 92                                | 0.83139  | 0.915918 | 0.331149 |
| chromosome 12 open reading frame 53                          | 0.969937 |          |          |
| lymphocyte-activation gene 3                                 |          | 2.688206 | 2.434324 |
| similar to DEAH (Asp-Glu-Ala-Asp/His) box polypeptide 57     | 0.934914 | 0.931004 | 1.228739 |
| poly(A) binding protein, cytoplasmic 1                       | 1.682904 | 0.457836 | 0.642418 |
| prominin 1                                                   |          |          | 17.33584 |
| centrosome and spindle pole associated protein 1             | 1.218399 | 0.730642 | 0.215763 |
| centrosome and spindle pole associated protein 1             | 2.18851  | 0.664353 | 0.119269 |
| similar to OTTHUMP00000016587                                |          | 2.196907 | 1.3031   |
| SH3 domain and tetratricopeptide repeats 2                   |          |          |          |
| CCR4-NOT transcription complex, subunit 6 /// similar to C   | 2.571789 | 0.876618 | 0.196915 |
| CCR4-NOT transcription complex, subunit 6                    | 0.922693 | 1.061717 | 0.308236 |
| complement component 1, s subcomponent                       | 3.379458 | 1.597147 | 1.331501 |
| ATP/GTP binding protein-like 2                               | 0.125066 |          | 3.909345 |
| metallothionein 3                                            | 0.731421 | 1.187904 | 3.712142 |
| suppressor of Ty 5 homolog (S. cerevisiae)                   |          | 0.930338 | 2.302522 |
| LAG1 homolog, ceramide synthase 3                            | 1.750323 | 0.571186 | 0.316069 |
| LAG1 homolog, ceramide synthase 3                            |          | 1.91273  | 0.418469 |
| spinster homolog 2 (Drosophila)                              |          |          |          |
| chromodomain helicase DNA binding protein 1                  |          | 1.381052 | 0.399296 |
| hypothetical LOC427110                                       |          | 0.462234 | 0.093867 |
| hypothetical LOC427110                                       | 0.360558 | 1.013726 | 0.578694 |
| multiple C2 domains, transmembrane 1                         | 1.352732 | 1.45875  | 2.457731 |
| calsyntenin 3                                                | 1.022353 |          | 0.358008 |
| elongation factor, RNA polymerase II, 2                      |          | 1.141886 | 2.349776 |
| similar to PC1 /// prohormone convertase1                    | 0.275137 |          | 0.552948 |
| calpastatin                                                  | 0.980352 |          | 3.695224 |
| membrane-associated ring finger (C3HC4) 3                    |          | 0.86132  | 0.662093 |
| multiple EGF-like-domains 10                                 |          |          | 23.53209 |
| interleukin 31 receptor A                                    | 0.735741 |          | 2.336389 |
| C-type lectin-like receptor variant                          | 0.825598 | 2.344211 | 1.505107 |
| similar to RAB3C, member RAS oncogene family                 | 0.31621  | 0.804972 | 1.048325 |
| DEP domain containing 1B                                     | 0.708636 | 1.259949 | 0.52409  |
| ELOVL family member 7, elongation of long chain fatty acid   | 1.442649 | 1.14948  | 1.473256 |

|                                                               |          |          |          |
|---------------------------------------------------------------|----------|----------|----------|
| hypothetical protein LOC770670                                | 1.758665 | 0.610442 | 0.479026 |
| similar to KIAA1577 protein                                   | 2.773452 | 0.59236  | 0.765042 |
| ring finger protein 180                                       | 0.584104 | 1.539075 | 0.272279 |
| SFRS12-interacting protein 1                                  | 0.376784 | 1.165296 | 2.061121 |
| ADAM metallopeptidase with thrombospondin type 1 motif, 6     |          |          | 0.038437 |
| ADAM metallopeptidase with thrombospondin type 1 motif, 6     |          | 1.061955 | 14.48766 |
| similar to Microtubule-associated serine/threonine-protein ki | 0.964415 | 0.819724 | 0.286607 |
| hypothetical protein LOC770116                                | 2.154618 | 1.317318 | 2.228347 |
| KIAA2018                                                      | 2.195482 |          |          |
| homer homolog 1 (Drosophila)                                  | 2.021694 | 1.008223 | 0.333773 |
| similar to Junction-mediating and regulatory protein          | 0.587402 | 4.960792 | 1.592842 |
| elastin microfibril interfacier 2                             | 1.289145 | 0.953063 | 2.302324 |
| protein tyrosine phosphatase, receptor type, K                |          |          | 0.037237 |
| tripartite motif-containing 45                                | 0.722721 | 0.960209 | 2.204655 |
| chromosome 6 open reading frame 190                           | 0.905373 | 1.084112 | 0.198821 |
| prostaglandin E receptor 4 (subtype EP4)                      | 1.004303 | 1.359052 | 10.29238 |
| prostaglandin E receptor 4 (subtype EP4)                      | 1.886731 | 1.638295 | 2.566164 |
| chromosome 6 open reading frame 174                           | 0.819037 | 1.050831 | 0.158161 |
| protein kinase, AMP-activated, alpha 1 catalytic subunit      | 0.32693  | 0.90092  | 1.802872 |
| lipin 2                                                       | 0.742116 |          | 3.34463  |
| F-box protein 4                                               |          |          |          |
| Similar to Sphingomyelin phosphodiesterase, acid-like 3A      | 2.839447 | 1.091758 | 0.986116 |
| autoimmune regulator                                          | 0.794281 | 0.796757 | 1.594147 |
| discoidin, CUB and LCCL domain containing 1                   | 0.522665 | 1.445229 | 0.016021 |
| similar to Rho-guanine nucleotide exchange factor             | 0.19073  | 0.610983 | 5.484241 |
| polymerase (DNA directed), theta                              |          | 7.077557 | 0.926786 |
| similar to Rho-guanine nucleotide exchange factor             | 1.045766 | 0.536981 | 0.068368 |
| karyopherin alpha 5 (importin alpha 6)                        |          | 0.79191  | 0.428881 |
| karyopherin alpha 5 (importin alpha 6)                        | 0.472768 | 1.357825 | 0.954627 |
| syntaxin binding protein 5-like                               |          | 0.411554 | 2.797972 |
| similar to KIAA0888 protein                                   | 1.114314 | 0.752322 | 1.516006 |
| general transcription factor IIE, polypeptide 1, alpha 56kDa  |          | 0.318876 |          |
| chromosome 5 open reading frame 37                            | 0.479649 | 0.887771 | 0.56936  |
| synaptic vesicle glycoprotein 2C                              | 0.972368 | 0.875858 |          |
| mindbomb homolog 1 (Drosophila)                               | 0.825942 | 0.292122 | 0.938917 |
| mindbomb homolog 1 (Drosophila)                               | 0.906098 | 0.707601 | 1.39269  |
| coagulation factor II (thrombin) receptor                     | 1.075999 | 1.345239 | 0.664654 |
| transmembrane protein 128                                     |          | 1.047837 | 0.213533 |
| transmembrane protein 128                                     | 0.702734 | 1.511973 | 0.353114 |
| Ly1 antibody reactive homolog (mouse)                         | 1.181181 | 2.13626  | 1.084203 |

|                                                                      |          |          |          |
|----------------------------------------------------------------------|----------|----------|----------|
| solute carrier family 22 (organic cation transporter), member        | 0.487418 | 0.339538 |          |
| Ellis van Creveld syndrome                                           |          |          | 0.210717 |
| cell division cycle 2-like 6 (CDK8-like)                             | 0.799628 | 1.085149 | 0.352884 |
| laminin, alpha 3                                                     | 2.338572 | 1.40452  | 1.385732 |
| protein tyrosine phosphatase, receptor type, D                       | 1.169136 |          |          |
| cell division cycle 40 homolog (S. cerevisiae)                       | 1.118029 | 0.951555 | 0.439725 |
| similar to Cdc42 GTPase-activating protein                           | 0.278054 |          |          |
| myeloid/lymphoid or mixed-lineage leukemia (trithorax homolog, Dros  |          | 7.360351 | 1.339029 |
| myeloid/lymphoid or mixed-lineage leukemia (trithorax hom            | 1.550006 | 0.431562 | 1.180136 |
| N-acylsphingosine amidohydrolase 3-like                              |          | 0.859271 |          |
| DENN/MADD domain containing 4C                                       | 2.346525 | 0.75149  | 1.05696  |
| oxysterol binding protein-like 1A                                    | 1.850278 | 1.171622 | 2.46983  |
| hypothetical LOC427239 /// HAUS augmin-like complex, su              | 0.348303 | 0.681792 | 0.976972 |
| chromosome 9 open reading frame 39                                   | 0.271217 | 1.082741 | 13.05556 |
| similar to basonuclin 2                                              | 1.866505 |          | 2.274749 |
| hypothetical LOC421081                                               |          |          |          |
| amyloid beta (A4) precursor protein-binding, family A, member 1 (X11 |          | 0.377998 |          |
| TAF4b RNA polymerase II, TATA box binding protein (TB                | 1.592386 | 1.004005 | 0.893138 |
| TAF4b RNA polymerase II, TATA box binding protein (TB                | 1.357345 | 3.859926 | 2.395851 |
| G protein-coupled receptor 15                                        |          |          | 0.085334 |
| G protein-coupled receptor 15                                        | 1.005693 | 1.937794 | 0.344903 |
| immunoglobulin-like domain containing receptor 1                     | 0.876857 | 0.973773 | 0.125255 |
| WD repeat domain 52                                                  |          | 0.652809 | 1.216018 |
| guanine deaminase                                                    | 2.458185 |          | 1.251433 |
| desmoglein 2                                                         |          | 0.371537 | 0.673095 |
| UDP-Gal:betaGlcNAc beta 1,4- galactosyltransferase, polyp            | 1.195961 | 0.778578 | 0.150709 |
| hypothetical LOC421093                                               |          | 2.67653  | 0.349159 |
| hypothetical LOC431610                                               |          | 1.665317 | 0.457884 |
| hypothetical LOC431610                                               | 0.135972 |          |          |
| guanine nucleotide binding protein (G protein), alpha 14             |          | 0.142956 | 2.572171 |
| guanine nucleotide binding protein (G protein), q polypeptid         | 1.11727  | 0.585206 | 1.026667 |
| guanine nucleotide binding protein (G protein), q polypeptid         | 0.174465 | 0.476249 |          |
| dystrobrevin, alpha                                                  |          |          |          |
| zeta-chain (TCR) associated protein kinase 70kDa                     | 0.845959 | 1.214884 | 0.441376 |
| similar to Protein KIAA0146                                          | 0.984651 | 1.09174  | 1.422007 |
| transmembrane protein 157                                            | 0.47824  | 0.858208 | 1.43921  |
| similar to organic anion transporter OATP-M1                         |          | 3.095462 | 1.618864 |
| gypsy retrotransposon integrase 1                                    | 0.973559 | 1.264991 | 0.365476 |
| non-SMC condensin II complex, subunit D3                             | 1.257008 | 1.897557 | 0.379924 |
| RB1-inducible coiled-coil 1                                          | 1.252724 | 2.222851 | 2.073548 |



|                                                                             |          |          |          |
|-----------------------------------------------------------------------------|----------|----------|----------|
| protein phosphatase 1F (PP2C domain containing)                             | 1.164801 | 2.363902 | 5.762789 |
| TBC1 domain family, member 23                                               | 1.117707 | 1.507854 | 0.339449 |
| TBC1 domain family, member 23                                               |          | 0.798382 | 0.405913 |
| armadillo repeat containing 2                                               | 1.210813 | 1.787496 | 0.489679 |
| G protein-coupled receptor 128                                              |          | 0.132683 |          |
| leucyl/cystinyl aminopeptidase                                              | 0.326316 | 0.576718 | 0.8292   |
| lactation elevated 1                                                        | 1.624604 | 1.099258 | 1.481843 |
| lactation elevated 1                                                        | 1.753903 | 1.007395 | 1.19744  |
| ABI gene family, member 3 (NESH) binding protein                            |          |          | 5.683592 |
| sex comb on midleg-like 4 (Drosophila)                                      | 0.064469 |          |          |
| tripartite motif-containing 14                                              | 0.698193 | 0.818039 | 0.565741 |
| tripartite motif-containing 14                                              | 0.448283 | 1.272914 | 0.486108 |
| similar to KIAA1889 protein                                                 | 1.526692 | 0.559551 | 2.137649 |
| interphotoreceptor matrix proteoglycan 2                                    | 1.647787 | 0.782835 |          |
| SUMO1/sentrin specific peptidase 7                                          | 0.92022  | 0.357613 | 0.590641 |
| hypothetical LOC421125                                                      | 1.200608 | 0.577601 | 0.221147 |
| absent in melanoma 1                                                        | 1.336151 | 0.473025 | 0.551765 |
| Cas-Br-M (murine) ecotropic retroviral transforming sequen                  | 0.816124 |          | 2.761425 |
| SH2 domain containing 1B                                                    | 1.202038 | 0.429128 | 0.446528 |
| T cell receptor associated transmembrane adaptor 1                          | 0.838138 | 0.877029 | 0.13859  |
| THAP domain containing, apoptosis associated protein 1                      | 0.978761 | 0.948752 | 0.753756 |
| PR domain containing 1, with ZNF domain                                     | 9.61953  | 1.37781  | 3.382596 |
| transmembrane protease, serine 7                                            | 12.00788 |          |          |
| hook homolog 3 (Drosophila)                                                 | 0.610842 | 1.524311 | 3.123709 |
| CGG triplet repeat binding protein 1                                        | 0.504066 | 0.504258 | 0.062289 |
| hypothetical LOC430761 /// hypothetical protein LOC77646                    | 1.621633 | 2.168481 | 0.578762 |
| prolyl endopeptidase                                                        |          | 1.392483 | 0.055183 |
| HECT domain and ankyrin repeat containing, E3 ubiquitin p                   | 1.376369 | 1.119285 | 0.480738 |
| HECT domain and ankyrin repeat containing, E3 ubiquitin p                   | 12.7601  |          | 8.04084  |
| MYC induced nuclear antigen /// MYC induced nuclear anti                    | 1.121885 | 1.32729  | 0.387449 |
| pleckstrin and Sec7 domain containing 3                                     | 0.84689  | 0.102772 | 1.904926 |
| solute carrier family 12 (sodium/potassium/chloride transporters), member 1 |          |          | 19.50923 |
| fibronectin type III and SPRY domain containing 1-like                      | 0.867661 | 0.746733 | 0.306563 |
| CD2 molecule                                                                | 0.680241 | 0.672787 | 0.095417 |
| immunoglobulin superfamily, member 3                                        |          | 7.951039 | 1.065421 |
| chromodomain helicase DNA binding protein 7                                 | 1.23289  | 0.772727 | 0.370812 |
| KTEL (Lys-Tyr-Glu-Leu) containing 1                                         |          |          | 0.605177 |
| gamma-glutamyl hydrolase (conjugase, folylpolygammaglut                     | 1.538507 | 1.169171 | 0.229331 |
| armadillo repeat containing 1                                               | 1.775457 | 1.275913 | 0.563689 |
| kelch-like 32 (Drosophila)                                                  | 1.97461  | 2.277745 |          |

|                                                             |          |          |          |
|-------------------------------------------------------------|----------|----------|----------|
| kelch-like 32 (Drosophila)                                  | 0.551035 | 0.933402 | 0.705987 |
| centrosomal protein 110kDa                                  | 1.008104 | 0.438857 | 0.512251 |
| roundabout, axon guidance receptor, homolog 2 (Drosophila)  | 3.590213 | 0.733791 |          |
| serum/glucocorticoid regulated kinase family, member 3      | 1.031138 | 0.802988 | 0.346953 |
| glutamate receptor, ionotropic, N-methyl-D-aspartate 3A     | 0.391554 | 0.703733 | 0.231592 |
| glutamate receptor, ionotropic, N-methyl-D-aspartate 3A     | 0.543554 | 0.471866 | 0.235535 |
| similar to AASA9217                                         |          | 2.138558 |          |
| ankyrin repeat domain 34B                                   | 0.82368  | 0.187159 |          |
| KIAA0776                                                    | 1.420732 | 0.95108  | 0.637505 |
| solute carrier organic anion transporter family, member 5A1 |          | 0.811411 |          |
| hypothetical LOC427318                                      | 0.626766 | 1.049519 | 0.699881 |
| HGF activator                                               | 17.99127 | 1.164233 |          |
| lactamase, beta 2                                           |          | 0.091987 |          |
| lactamase, beta 2                                           | 0.828239 | 1.408095 | 0.313645 |
| huntingtin                                                  | 1.066854 | 0.938988 | 0.753199 |
| von Willebrand factor A domain containing 1                 |          | 0.858534 | 0.165755 |
| ROD1 regulator of differentiation 1 (S. pombe)              | 7.065658 |          | 0.163011 |
| sushi domain containing 1                                   |          | 3.754582 |          |

---

ifference for the comparison of uninfected and infected transcripts. (\*) indicates  $p < 0.05$  and (\*\*

|          | Significant Level |       |       |       | 7DPI_inf   | 14DPI_m  | 21DPI_m  | 28DPI_m  |
|----------|-------------------|-------|-------|-------|------------|----------|----------|----------|
| 28dpi    | 7dpi              | 14dpi | 21dpi | 28dpi | ected_call | ected_ca | ected_ca | ected_ca |
| 0.363716 |                   |       |       | **    | P          | P        | P        | P        |
| 13.96645 |                   |       | *     | **    |            |          | P        | P        |
| 2.121137 | *                 | *     | *     | *     | P          | P        | P        | P        |
| 0.926058 | *                 |       |       |       | P          | P        | P        | P        |
|          |                   | *     |       |       | P          | P        |          |          |
| 3.276955 |                   |       |       | *     | P          | P        | P        | P        |
| 2.11441  |                   |       |       | *     | P          | P        | P        | P        |
| 2.13054  |                   |       |       | *     | P          | P        | P        | P        |
| 0.762227 |                   |       |       |       | P          | P        | P        | P        |
| 1.480932 |                   |       | *     |       | P          | P        | P        | P        |
| 0.464085 |                   |       |       |       | P          |          |          | A        |
| 2.229571 |                   |       |       | *     |            |          |          | P        |
|          |                   | **    |       |       |            | P        |          |          |
| 0.542844 |                   |       |       |       | P          | P        | P        | P        |
| 0.502223 |                   |       |       |       | P          | P        | P        | P        |
|          | *                 |       | *     |       | P          | P        | P        |          |
| 4.011218 |                   | *     |       | *     | P          | P        | P        | P        |
|          | **                | *     |       |       | P          | P        | P        |          |
| 2.007602 |                   | *     |       | *     | P          | P        | A        | M        |
| 0.391681 |                   |       |       |       | P          | P        | P        | P        |
|          |                   |       |       |       |            |          | A        |          |
| 8.760839 | *                 |       | **    | **    | P          | P        | P        | P        |
| 1.260786 | **                |       |       |       | P          |          | A        | A        |
| 0.925184 |                   |       |       |       | P          | P        | P        | P        |
| 0.257523 |                   |       |       |       | P          | P        | M        | A        |
| 2.304867 |                   |       |       | *     |            |          |          | P        |
| 0.461588 |                   |       |       |       | P          | P        | P        | P        |
| 0.525039 |                   |       |       |       | P          | P        | P        | A        |
| 1.49441  |                   |       |       |       | P          | P        |          | A        |
| 0.277195 |                   |       |       |       | M          | A        | A        | A        |
|          |                   |       |       |       |            |          | A        |          |
| 51.04888 |                   |       |       | **    |            |          |          | P        |
| 1.798106 |                   |       | *     |       | P          | P        | P        | P        |
| 1.751985 |                   |       | *     |       | P          | P        | P        | P        |

|          |    |    |    |   |   |   |   |
|----------|----|----|----|---|---|---|---|
| 1.076321 |    |    |    | A | P | A | A |
|          |    |    |    |   |   | A |   |
| 1.04054  | *  | *  |    | A | P | P | A |
|          | *  |    |    |   | P |   |   |
| 0.48258  |    |    |    | P | A | A | A |
|          |    | *  |    | P | P | P |   |
| 2.243043 |    |    | *  |   |   | A | P |
| 0.347495 |    |    |    | P | P | P | P |
| 1.311711 |    |    |    | P | P | A | P |
|          | *  |    |    | P | P | A |   |
|          |    |    |    | A | P | A |   |
| 0.924559 |    |    |    | P | A | A | P |
| 1.305182 |    | *  |    | P | P | P | P |
|          |    | ** |    |   |   | P |   |
| 2.060813 |    |    | *  |   | A |   | P |
| 0.228346 |    |    |    | P | P | P | P |
| 0.468414 |    |    |    |   |   |   | A |
|          |    |    |    |   |   | A |   |
| 0.419118 |    |    |    | P | P | P | P |
| 1.72937  |    |    |    | P | M | A | P |
| 2.064552 |    |    | *  | P | P | P | P |
| 2.284964 |    |    | *  | P | P | P | P |
| 0.585887 | *  |    |    | P | P | P | A |
|          |    |    |    |   | P | A |   |
|          | ** |    |    | P | A |   |   |
|          |    | ** |    |   | P |   |   |
| 1.721305 |    | ** |    | P | P | P | P |
| 2.03357  | ** | ** | *  | P | P | P | A |
|          | ** |    |    | P |   |   |   |
| 17.03985 |    | ** | ** |   |   | P | P |
| 0.885255 |    |    |    | P | P | P | A |
| 0.789722 |    |    |    | P | P | P | P |
| 1.227606 |    |    |    | P | P | A | A |
|          |    |    |    |   | A |   |   |
|          | *  |    |    |   | P | A |   |
|          |    |    |    | M |   | A |   |
|          |    |    |    | A |   |   |   |
| 0.478805 |    |    |    | P | P | P | P |
| 0.199077 |    |    |    | P | P | P | P |
| 2.007971 |    |    | *  |   |   |   | M |

|          |    |    |    |    |   |   |   |   |
|----------|----|----|----|----|---|---|---|---|
| 9.235327 |    |    | ** | ** | P | P | P | P |
|          |    | ** |    |    |   | P |   |   |
| 6.609344 | ** |    |    | ** | P | P | P | P |
| 2.639131 | *  |    |    | *  | P | P | P | P |
| 1.529801 |    |    | ** |    | P |   | P | P |
| 2.166892 |    |    |    | *  | P | P | P | P |
| 0.793024 |    |    |    |    |   | M | A | P |
| 2.577168 |    |    |    | *  | P | P | P | P |
| 6.873447 |    |    | *  | ** | P |   | P | P |
| 2.992053 |    |    |    | ** |   | A | A | M |
| 21.2442  | *  |    | *  | ** | P | M | P | P |
| 3.045599 |    |    |    | ** |   |   |   | P |
| 2.542212 |    |    | ** | *  | P | P | P | P |
| 2.777203 |    | *  |    | *  |   | P |   | P |
| 2.633987 |    |    |    | *  | P | P | P | P |
| 3.346363 |    |    | *  | *  | P |   | P | M |
|          | ** |    |    |    | P | A | A |   |
| 4.920852 |    |    | *  | *  | P | P | P | P |
| 0.897622 |    |    |    |    | P | P | P | P |
| 1.395677 |    |    |    |    | A | A |   | A |
|          |    |    | ** |    |   |   | M |   |
| 1.047658 | *  |    | *  |    | P | P | M | A |
|          | *  |    |    |    | P |   |   |   |
| 1.93402  |    |    | *  |    | P | P | P | P |
| 0.3904   |    |    |    |    | P | P | P | P |
| 3.743722 |    |    |    | *  | P | P | A | P |
| 1.378504 |    |    |    |    | P | P | P | P |
| 0.261587 |    |    |    |    | P | P | P | P |
| 2.389896 |    |    |    | *  | P | P | P | P |
| 0.361547 |    |    |    |    | P | P | P | A |
| 0.288118 |    |    |    |    | P | A | P | A |
| 1.296007 |    |    | ** |    | P | P | P | P |
|          |    |    |    |    |   | A |   |   |
| 1.586824 |    |    | *  |    | P | A | P | P |
| 1.445802 | *  |    |    |    | P | P | P | P |
| 2.808742 |    |    |    | *  | P | P | P | A |
| 2.908747 |    |    | ** | ** | P | P | P | P |
|          | ** |    |    |    | P | A | P |   |
| 13.53496 |    |    |    | ** | P | P | P | M |
|          |    |    |    |    |   | A |   |   |

|          |    |    |    |    |   |   |   |   |
|----------|----|----|----|----|---|---|---|---|
| 0.186923 |    |    |    |    | M | P |   | A |
|          |    |    | *  |    |   | P |   |   |
| 1.624577 |    |    |    |    | P | P | M | A |
| 0.746307 |    |    |    |    | P | P | A | A |
| 4.759889 | ** | *  | ** | *  | P | P | P | P |
| 5.049894 | *  |    | ** | *  | P | P | P | P |
| 7.868758 | ** | *  | *  | ** | P | P | P | P |
| 0.361564 |    |    |    |    | P | P | P | A |
|          |    |    | *  |    |   | A | P |   |
|          |    |    |    |    | A | M | A |   |
| 0.458264 |    |    |    |    | P | P | P | A |
| 1.356079 |    |    |    |    | P | P | P | P |
| 1.236178 |    |    | *  |    | P | P | P | P |
|          |    |    |    |    |   |   | A |   |
| 0.483313 |    | *  |    |    | A | P | P | A |
| 1.369649 |    |    |    |    | P | P | A | P |
| 3.173813 |    |    |    | ** | P | M |   | P |
|          |    |    |    |    | A | P | P |   |
| 0.452937 |    |    |    |    | A |   |   | A |
|          |    | *  |    |    |   | P |   |   |
| 0.731145 |    |    |    |    | P | P | P | P |
| 1.723337 |    |    | *  |    | P | P | P | P |
|          |    |    |    |    |   | A |   |   |
| 4.044955 |    |    |    | *  | M | P | P | P |
| 1.573838 |    |    | ** |    | P | P | P | P |
|          |    |    |    |    | A |   |   |   |
| 0.443436 |    |    |    |    | P | P | P | P |
| 0.982086 |    |    |    |    | P | P | P | A |
|          |    |    | *  |    |   |   | P |   |
|          |    | ** |    |    |   | P |   |   |
|          |    |    |    |    |   |   | A |   |
| 0.783114 |    | *  |    |    | A | P |   | P |
|          |    |    |    |    | A | A |   |   |
| 0.528131 |    |    |    |    | P | P | P | P |
| 1.483017 |    |    |    |    | P | P | A | A |
| 0.570978 | *  |    |    |    | P | P | P | A |
| 12.35487 |    |    |    | ** |   |   |   | P |
| 5.336641 |    |    |    | *  |   |   |   | P |
| 1.242246 |    |    | ** |    | P | M | P | A |

|          |    |    |    |   |   |   |   |
|----------|----|----|----|---|---|---|---|
|          |    |    |    |   |   | A |   |
|          |    |    |    | A | A | A |   |
| 2.502155 |    |    | *  | A |   |   | A |
|          |    |    |    | A |   |   |   |
| 2.699011 |    |    | *  | M | P | P | P |
|          |    |    |    | A |   |   |   |
| 0.654999 |    |    |    | P | P | P | A |
| 2.109851 |    |    | *  | M |   | P | A |
| 1.198348 |    | *  |    | A |   | P | M |
| 54.24393 |    |    | ** |   |   |   | P |
|          |    |    |    |   | P | A |   |
|          |    | *  |    | A |   | A |   |
|          |    |    |    |   |   | A |   |
| 0.73467  |    |    |    | P | P | P | P |
|          |    |    |    | A |   |   |   |
| 2.309592 |    |    | *  |   |   |   | M |
| 0.438076 |    |    |    | P | P | P | P |
| 5.388739 |    |    | *  | P | A | P | P |
| 2.167751 |    |    | *  |   |   |   | P |
| 0.803491 | ** |    |    | P | A | A | A |
| 1.07768  |    | ** |    | P | P | P | P |
|          |    |    |    | A | A | P |   |
| 3.046458 |    |    | ** | A | A | A | P |
| 6.431019 |    |    | *  |   |   |   | P |
| 0.482606 |    |    |    | P | P | P | P |
|          |    |    |    |   |   | A |   |
| 0.993333 |    | *  |    | P | P | P | P |
|          |    |    |    |   |   | A |   |
| 1.033961 | *  |    |    | P | P | P | A |
| 0.809696 |    |    |    | P | P | P | A |
|          |    |    |    |   |   | A |   |
|          |    |    |    | P | P | P |   |
|          | ** |    |    | M |   |   |   |
| 3.355837 | *  |    | *  | P | P | M | P |
| 0.341383 |    |    |    | P | P | P | P |
|          |    |    |    |   | A |   |   |
| 0.652055 |    |    |    | P | P | P | A |
| 2.633869 |    |    | *  | P | P | P | P |
|          |    |    |    |   |   | A |   |
|          |    |    |    | A |   |   |   |

|          |    |    |    |    |   |   |   |   |
|----------|----|----|----|----|---|---|---|---|
|          | ** | ** |    |    | P | P | A |   |
|          |    |    |    |    | A | A | A |   |
| 2.289936 |    |    |    | *  | A | A | A | P |
| 0.834367 | *  |    |    |    | M | A |   | A |
| 2.587289 | ** |    | *  | *  | P | P | P | P |
| 2.406765 |    |    | ** | *  | P | P | P | P |
| 0.434477 |    |    |    |    | P | P | P | P |
| 2.770905 |    |    |    | *  | P | P | P | P |
|          |    |    |    |    |   |   | A |   |
| 1.304912 | *  |    |    |    | P | P | A | A |
| 1.526519 |    |    |    |    | P | P | P | P |
| 0.428654 |    | *  |    |    |   | P |   | A |
|          |    |    |    |    | P | P | A |   |
| 0.158108 |    |    |    |    | P | P | P | A |
| 0.19664  |    |    |    |    | P | M | A | A |
|          |    |    |    |    | M | A |   |   |
| 0.847624 |    |    |    |    | P | P | P | A |
| 0.802988 |    |    |    |    | P | P | P | P |
| 0.54624  |    |    | *  |    | P | P | P | P |
| 1.458595 |    |    |    |    | P | M | A | P |
| 6.504479 |    | *  | ** | ** | P | P | P | P |
| 1.147503 |    |    |    |    | P | P | P | P |
| 0.434793 |    |    |    |    | A | P | P | A |
| 0.614971 |    |    |    |    | P | P | P | P |
|          |    | ** |    |    |   | P |   |   |
| 2.316484 |    |    | *  | *  | P | P | P | P |
| 3.20737  |    |    |    | ** | P | P | P | P |
| 3.096613 |    |    |    | ** | A | A | A | P |
|          | *  |    |    |    | P | A |   |   |
| 1.19673  |    |    | *  |    | P | P | P | P |
| 1.868071 | ** |    | *  |    | P | P | P | P |
| 1.232252 |    | *  |    |    | A | P | P | P |
| 0.3609   |    |    |    |    | P | P | P | P |
|          |    |    |    |    | A |   | A |   |
| 2.10543  |    |    |    | *  |   |   |   | P |
|          |    |    |    |    |   | A |   |   |
| 0.119821 |    |    |    |    |   | P |   | A |
| 1.849683 |    | *  |    |    | P | P | P | A |
| 1.417516 | ** | *  | *  |    | P | P | P | P |
|          | ** |    |    |    | P |   |   |   |



|          |   |    |    |   |   |   |   |
|----------|---|----|----|---|---|---|---|
|          |   |    |    | A | A |   |   |
| 3.032396 |   |    | ** |   |   |   | M |
| 2.105586 |   | *  | *  | P | P | P | P |
|          |   |    |    |   |   | A |   |
| 0.389312 |   | ** |    | P | P | P | A |
| 0.579188 |   |    |    | P | P | P | P |
| 0.858342 |   |    |    | P | P | P | P |
| 0.356737 |   |    |    | P | A | A | A |
| 0.128305 |   |    |    |   | P |   | A |
| 5.01248  |   |    | *  | P | P | P | P |
| 5.383987 |   |    | *  | P | P | P | P |
| 11.55273 |   |    | ** | P | P | P | P |
|          |   |    |    | P | P |   |   |
| 0.230706 |   |    |    | P | P | P | A |
| 3.103345 |   | *  | ** | P | P | P | P |
| 2.353079 |   |    | *  | P | P | P | P |
| 3.013534 |   |    | ** | A | A | P | P |
| 2.815635 |   | *  | *  | P | P | P | P |
| 1.454008 |   |    |    |   | P | A | P |
|          | * |    |    | P | P | P |   |
| 0.284409 |   |    |    | P |   |   | A |
| 0.099034 |   | *  |    |   | P |   | A |
| 1.896013 |   | *  |    | P | P | P | P |
| 2.112109 |   | ** | *  | P | P | P | P |
| 2.910214 |   |    | ** | P | P | P | P |
| 0.366665 |   |    |    |   | P |   | A |
| 1.402815 |   |    |    | P | P | P | P |
|          |   |    |    | P | P | A |   |
| 0.422734 |   |    |    | P | P | P | P |
| 3.796117 |   | *  | *  | P | M | P | P |
| 2.003056 |   | *  | *  | P | P |   | P |
| 0.556043 |   |    |    | P | M | M | A |
|          |   |    | ** | M | A | P |   |
| 0.492902 |   |    |    | P | P | P | P |
|          |   | *  |    |   |   | P |   |
|          |   |    |    | A | P | A |   |
|          | * | ** |    | M | P |   |   |
|          | * |    |    | P | A |   |   |
| 0.270503 |   | *  |    |   | P |   | A |
| 0.841607 |   |    |    | P |   | A | A |

|          |    |    |    |    |   |   |   |   |
|----------|----|----|----|----|---|---|---|---|
|          |    |    | *  |    |   |   | M |   |
|          |    |    | ** |    |   |   | P |   |
| 2.752926 | *  |    | *  | *  | P | P | P | P |
| 24.42688 |    |    |    | ** |   |   |   | P |
|          |    |    |    |    |   | P | A |   |
| 0.336018 |    |    |    |    | P | P | A | A |
| 4.654975 |    |    |    | *  | P | P | P | P |
| 2.098648 |    |    |    | *  | P | P | P | P |
| 0.716938 | ** |    |    |    | P | A |   | A |
| 0.631921 |    |    |    |    |   | A | P | A |
| 0.15968  |    |    |    |    |   |   |   | A |
|          |    |    |    |    | P | M | A |   |
|          |    | ** |    |    | P | P | P |   |
|          | *  |    |    |    | P |   |   |   |
| 2.414482 | *  |    |    | *  | P | P | P | P |
| 0.853157 | *  |    |    |    | P |   | A | A |
|          |    |    |    |    |   | A | A |   |
| 6.70071  |    |    | *  | ** | P | P | P | P |
| 2.18329  |    |    |    | *  | P | P | P | P |
| 0.25411  |    |    |    |    | M | P | P | A |
|          |    | ** |    |    | A | P |   |   |
| 0.96119  |    |    |    |    | P | A | P | P |
| 2.919163 |    |    |    | ** | P | P | P | P |
| 0.39324  |    |    |    |    | P | P | P | P |
|          |    |    |    |    | P | A | A |   |
| 0.578625 | *  | *  |    |    | P | P |   | A |
| 1.622683 |    | ** |    |    | P | P | P | A |
| 0.134465 |    | ** |    |    |   | P |   | A |
| 5.184461 |    |    | *  | *  | P | P | P | P |
| 4.076199 |    |    |    | *  | P | A |   | P |
| 8.122546 |    |    | *  | ** | P | P | P | M |
|          |    |    |    |    |   |   | A |   |
| 28.79579 |    |    |    | ** |   |   |   | P |
| 0.358195 |    |    |    |    | P | A | A | A |
| 1.099669 | *  |    |    |    | P | P | M | A |
| 0.325077 |    |    |    |    | P | P | P | P |
| 6.801782 |    |    |    | ** |   |   |   | P |
| 3.367453 |    |    |    | *  | M | M | A | P |
| 6.148662 |    |    |    | *  |   |   |   | P |
| 0.968629 |    |    |    |    | P | P | P | P |

|          |    |   |    |    |   |   |   |   |
|----------|----|---|----|----|---|---|---|---|
| 0.766914 |    |   | *  |    | P | P | P | P |
|          |    |   | *  |    | M |   | P |   |
| 0.420147 |    |   |    |    | P | P | P | M |
| 2.065095 |    |   |    | *  | A | P |   | P |
|          | ** |   |    |    | P | P | P |   |
|          | *  |   | ** |    | P |   | M |   |
|          |    |   |    |    | P | P | A |   |
| 3.445492 |    |   | *  | *  | P | P | P | P |
| 3.077197 |    |   | ** | ** | A |   | M | P |
| 1.328019 |    |   | *  |    | P | A | P | P |
| 2.173396 |    |   |    | *  | P | M | A | P |
| 0.045824 |    |   |    |    | P | P | M | A |
| 10.93148 |    |   |    | ** |   |   |   | P |
| 0.133064 | *  |   |    |    | P |   | A | A |
|          |    |   |    |    |   | A |   |   |
| 9.669394 |    |   |    | ** |   |   |   | P |
|          | ** |   |    |    | P |   |   |   |
| 11.37927 |    |   |    | ** |   | A |   | P |
| 0.374658 |    |   |    |    | P | P | P | A |
|          |    |   |    |    |   |   | A |   |
| 0.560519 |    |   |    |    | P | P | A | A |
| 2.032083 |    |   |    | *  | P | P | P | P |
| 0.763641 | ** |   |    |    | P | P | P | P |
| 2.566432 |    |   |    | *  | P | P | P | P |
| 0.575937 | *  |   |    |    | P | P | P | P |
| 0.492005 |    |   |    |    | P | P | P | P |
| 1.942457 |    |   |    |    | P | P | P | P |
| 10.53901 |    |   |    | ** | A |   |   | P |
| 0.455062 |    |   |    |    | P | P | P | A |
|          |    |   |    |    | A | P | A |   |
| 0.902199 | *  | * |    |    | P | P | P | P |
| 5.109856 | *  |   | ** | *  | P | P | P | P |
| 2.714198 |    |   |    | *  |   |   |   | P |
| 0.620174 |    |   |    |    | P | P | P | P |
|          |    |   | *  |    |   |   | P |   |
| 0.416241 | *  |   |    |    | P | P | P | P |
| 5.12397  | ** | * | ** | *  | P | P | P | P |
| 1.146582 |    |   |    |    | P | P | A | P |
| 0.460772 |    |   |    |    | P | P | P | A |
| 0.451599 |    |   |    |    | P | P | A | A |

|          |   |    |    |    |   |   |   |   |
|----------|---|----|----|----|---|---|---|---|
| 0.91677  |   |    |    |    | P | P | P | P |
|          | * |    |    |    | P |   |   |   |
| 0.22964  |   | ** |    |    | A | P | A | A |
|          |   |    |    |    | P | P | A |   |
| 0.927137 |   |    |    |    | P |   | A | P |
| 2.572853 |   |    | ** | *  | P | P | P | P |
|          |   |    | ** |    | P |   | P |   |
| 3.159621 |   |    |    | ** | P | P |   | P |
| 2.277462 |   |    |    | *  | P | P | P | P |
| 0.685764 |   |    |    |    | P | P | P | P |
|          |   |    |    |    |   |   | A |   |
| 0.523654 | * |    |    |    | P | P | P | A |
| 1.506186 |   |    | ** |    | P | P | P | P |
| 0.121183 |   |    |    |    |   | P | A | A |
|          |   |    |    |    | P | A | A |   |
|          |   | *  |    |    | P | P |   |   |
| 1.792111 |   |    |    |    |   | A |   | A |
| 0.159312 |   |    |    |    | A | A |   | A |
| 2.022649 | * |    | ** | *  | P | P | P | P |
| 2.874332 |   |    |    | ** |   | P | A | P |
|          |   |    |    |    |   |   | A |   |
| 0.45999  |   |    |    |    | P | P | P | P |
|          | * |    |    |    | M | M | A |   |
| 1.190474 |   |    |    |    | P | P | A | A |
| 3.136412 |   |    | *  | ** | P | P | P | P |
| 1.694376 |   |    | *  |    | P | P | P | P |
|          |   |    |    |    | A |   |   |   |
|          |   |    |    |    |   |   | A |   |
| 0.499903 |   |    |    |    | P | P | P | P |
|          |   |    |    |    | A | P | A |   |
| 36.0344  |   |    |    | ** | A |   | P | P |
|          |   |    | ** |    | P | A | M |   |
|          |   |    |    |    | A | P | A |   |
| 3.180223 |   |    |    | ** | A | P | P | P |
| 6.048607 | * | ** | ** | *  | P | P | P | P |
| 3.40625  |   |    |    | *  | P | P | A | P |
|          |   |    | *  |    |   |   | P |   |
| 2.975532 |   |    |    | ** |   |   |   | P |
|          |   | *  | *  |    | P | P | P |   |
| 1.415941 |   |    | *  |    | P | P | P | P |

|          |    |    |    |   |   |   |   |
|----------|----|----|----|---|---|---|---|
| 0.416139 |    |    |    | P | P | P | P |
|          |    | *  |    |   |   | M |   |
|          | *  |    |    | A | P | A |   |
| 11.03451 |    |    | ** |   | P | A | P |
| 2.741484 |    |    | *  | P | P | P | P |
| 2.641638 |    | ** | *  | P | P | P | P |
| 2.683852 |    | *  | *  | P | P | P | P |
| 0.182584 |    |    |    |   | A |   | A |
| 2.419045 |    |    | *  |   | A | A | M |
| 0.268281 |    |    |    | M | P | A | A |
|          |    | ** |    |   |   | P |   |
| 0.192644 |    |    |    | P | P | P | A |
| 0.426663 |    |    |    | P | P | P | P |
|          | ** |    |    | M |   |   |   |
| 1.874573 |    | *  |    | P | P | P | P |
| 1.342618 |    | *  |    | P | P | P | P |
| 2.648315 |    |    | *  | P | P | P | P |
| 2.598873 | ** |    | *  | P | P |   | P |
| 1.954446 | *  | *  |    | P | P | P | P |
| 3.546456 |    | ** | *  | P |   | P | P |
| 0.6804   |    |    |    | P | P | P | P |
| 2.328668 |    | *  | *  | P | P | P | P |
| 0.284559 |    |    |    | P | P | P | A |
| 2.657552 |    | *  | *  | P | P | P | P |
| 1.414627 |    | *  | *  | P | P | P | A |
|          | *  |    |    | P | A | A |   |
| 0.286386 |    |    |    |   |   |   | A |
| 2.879842 |    | *  | ** | P | P | P | P |
| 1.817474 |    | *  |    | P |   | P | P |
|          |    |    |    | P | A | A |   |
| 20.51612 |    | *  | ** | P | P | P | P |
| 1.949054 |    | *  |    | P | P | P | P |
| 23.46936 |    |    | ** | P | P | P | P |
| 1.086028 |    |    |    | P | P | A | A |
|          | *  | ** |    | P |   | M |   |
| 1.353216 |    |    |    | P | P | P | P |
|          |    | ** |    | P |   | P |   |
| 3.151759 |    | *  | ** | P | P | P | P |
| 1.837548 |    | *  |    | P | P | P | P |
| 0.363327 |    |    |    | P | P | A | A |

|          |    |   |    |    |   |   |   |   |
|----------|----|---|----|----|---|---|---|---|
| 1.571891 | *  |   | *  |    | P | P | P | P |
| 0.815357 |    |   | ** |    | P | P | P | P |
| 0.569305 |    |   |    |    | P | P | P | P |
| 2.394245 |    |   |    | *  | P | P | P | P |
|          |    |   | ** |    | P |   | P |   |
|          |    |   |    |    | A |   |   |   |
| 0.419049 |    |   |    |    | P | P | A | A |
| 1.309093 |    |   | *  |    | P | P | P | P |
|          |    |   |    |    |   | A |   |   |
| 0.547719 | *  |   |    |    | P | P | P | P |
| 0.786723 |    |   |    |    | P | P | P | P |
| 0.141705 |    |   |    |    | P | P | P | A |
| 0.521983 |    |   |    |    | P | P | P | P |
| 1.573484 |    |   | *  |    | P | P | P | P |
|          |    | * |    |    |   | M |   |   |
| 3.138345 |    |   | ** | ** | P | P | P | P |
| 0.077624 |    |   |    |    | P | P | P | A |
| 0.450276 | *  |   |    |    | P | P | P | A |
| 0.634183 |    |   |    |    | P | P | P | P |
| 0.663125 |    |   |    |    | P | P | P | P |
| 0.935021 |    |   |    |    | P | P | P | P |
| 10.06624 |    |   | ** | ** | P | P | P | P |
| 0.404449 |    |   |    |    | P | P | P | P |
| 2.833315 |    |   |    | *  | P | A | A | P |
| 0.188208 |    |   |    |    | P | P | P | P |
| 0.197111 |    |   |    |    | P | P | P | P |
| 0.501725 |    |   |    |    | P | P | P | P |
|          |    |   |    |    | M | P | A |   |
| 1.122863 |    |   |    |    | P | P | P | A |
| 1.055673 |    |   |    |    | P | P | P | A |
| 2.086544 |    |   |    | *  | P | P | M | P |
| 2.148204 |    |   |    | *  | A | P | A | P |
| 1.77158  |    |   | *  |    |   | A | P | P |
| 1.8512   | ** |   |    |    | P | P | P | P |
| 5.701534 |    |   |    | *  | P | A |   | P |
|          |    | * |    |    | A | P |   |   |
| 2.163173 |    |   |    | *  | P | P | P | P |
| 0.332946 |    |   |    |    | P | P | P | P |
| 0.371158 |    |   |    |    | P | P | A | A |
| 0.305137 |    |   |    |    | P | P | P | A |

|          |    |    |    |    |   |   |   |   |
|----------|----|----|----|----|---|---|---|---|
| 1.501309 |    |    | *  |    | P | P | P | P |
|          | *  |    |    |    | P |   | P |   |
| 1.587057 | *  |    |    |    | P | P | P | P |
| 4.774251 |    |    | ** | *  | P | P | P | P |
| 4.881579 |    |    | ** | *  | P | P | P | P |
| 0.282214 |    |    |    |    | P | P | P | P |
| 2.787846 | *  |    | *  | *  | P | P | P | P |
| 3.37145  |    |    |    | *  | P | P | P | P |
| 2.046837 |    |    |    | *  | P | P | P | P |
| 2.922958 |    |    | ** | ** | P | P | P | P |
| 0.564095 |    |    |    |    | P | P | P | P |
| 2.217163 |    |    | *  | *  | P | P | P | P |
| 2.953069 |    |    | *  | ** | P | P | P | P |
| 3.464259 |    |    | *  | *  | P | P | P | P |
| 3.955939 |    |    | ** | *  | P | P | P | P |
| 0.201042 |    |    |    |    |   |   |   | A |
| 2.359088 |    |    | *  | *  | P | P | P | P |
|          |    |    |    |    | P | P | A |   |
| 7.05353  | ** | *  | *  | ** | P | P | P | P |
| 4.467553 | *  | *  | *  | *  | P | P | P | P |
| 2.356405 | ** |    | *  | *  | P | P | P | P |
| 1.900422 |    |    | *  |    | P | P | P | P |
| 0.617188 |    |    |    |    | P | P | P | P |
| 8.397253 | *  | ** | ** | ** | P | P | P | P |
| 0.430284 |    |    |    |    | P | P | A | A |
| 0.455211 |    |    |    |    | P | P | P | P |
| 0.410315 |    | *  |    |    | P | P | P | A |
| 1.398984 |    |    | ** |    | P | P | P | P |
| 2.141617 |    |    |    | *  | P | P | P | P |
| 3.57762  | *  | ** | ** | *  | P | P | P | P |
|          | ** |    |    |    | P |   | A |   |
| 0.471716 | ** |    |    |    | P | P | P | A |
| 0.391713 | ** |    |    |    | P | P | P | M |
| 0.600492 |    |    |    |    | P | P | P | P |
|          |    | ** |    |    |   | P |   |   |
| 6.484647 | *  |    | ** | ** | P | P | P | P |
| 2.613985 |    |    | *  | *  | P | P | P | P |
| 6.083329 |    |    | *  | *  | P | P | P | P |
| 4.341564 |    |    |    | *  |   |   |   | M |
| 0.885382 |    |    | *  |    | P | P | P | P |

|          |   |    |    |    |   |   |   |   |
|----------|---|----|----|----|---|---|---|---|
| 3.599023 | * |    |    | *  | P | P | P | P |
| 2.231513 |   |    | *  | *  | P | P | P | P |
| 7.50918  | * | *  |    | ** | P | P | P | P |
| 5.514156 |   |    | ** | *  | P | P | P | P |
| 1.490012 |   |    |    |    | P | P | P | P |
| 0.133731 |   |    |    |    | P | P | A | A |
| 0.088751 |   |    |    |    | P | A | A | A |
| 2.420158 |   |    | *  | *  | P | A | P | M |
| 0.45857  |   |    |    |    | P | P | P | A |
| 2.146188 |   |    | *  | *  | P | A | P | P |
| 2.337335 |   |    | *  | *  | P | A | P | P |
|          | * |    |    |    | P |   | P |   |
| 1.139703 |   |    |    |    | P | P | P | P |
| 0.715627 |   |    |    |    | A | A | A | A |
| 2.225084 |   |    |    | *  |   |   | A | P |
| 2.296246 |   |    |    | *  | P | P | A | P |
| 2.45055  |   |    | *  | *  | P | P | P | P |
| 0.244512 |   |    |    |    | P | A | P | A |
|          |   |    |    |    | A | P | A |   |
| 2.466413 |   |    | ** | *  | P | P | P | P |
| 1.681676 |   |    | *  |    | P | P | P | P |
| 2.651695 | * | ** | *  | *  | P | P | P | P |
| 1.277223 |   |    | *  |    | P | P | P | A |
| 7.519582 | * |    | ** | ** | P |   | P | P |
| 2.394199 |   |    | *  | *  | P | M | P | P |
| 2.794786 |   |    |    | *  | A |   | P | P |
| 2.120179 |   |    |    | *  | P |   | P | A |
|          | * |    |    |    | P | P | M |   |
| 5.076858 |   |    | ** | *  | P | P | P | P |
|          | * |    |    |    | P | A | P |   |
| 0.411906 |   |    |    |    | P | P | P | P |
| 0.188084 |   |    |    |    | P | P | P | P |
| 0.617723 |   |    |    |    | P | P | P | P |
| 0.201681 |   |    |    |    | A | P | A | A |
| 0.071897 |   |    |    |    | P | P | P | P |
| 0.749981 |   |    |    |    | P | P | P | P |
| 1.000007 |   |    |    |    | P | A | P | A |
| 1.042682 |   |    |    |    | A | A | A | A |
|          |   |    |    |    | M | P | A |   |
| 0.443726 |   |    |    |    | P | P | P | P |



|          |    |    |    |    |   |   |   |
|----------|----|----|----|----|---|---|---|
| 1.604101 |    |    | *  | P  | P | P | P |
| 2.591699 |    |    |    | *  |   |   | P |
| 3.090979 |    |    |    | ** |   |   | P |
|          | *  |    |    | P  | P | A |   |
| 0.470681 | ** |    |    | P  |   | A | A |
| 1.928375 |    |    |    | P  | P | A | A |
| 2.48387  |    |    | *  | P  | P | P | P |
| 2.29687  |    | *  | *  | P  | P | P | P |
| 1.378744 |    |    |    | P  | P | A | P |
| 2.34519  |    |    | *  | P  | A | A | P |
| 0.285934 |    |    |    | P  |   | A | A |
| 2.093576 |    |    | *  | P  | P | P | M |
| 2.053447 |    | ** | *  | P  | P | P | P |
| 1.1145   | *  |    |    | P  | P | P | P |
| 0.841201 |    |    |    | P  | P | P | P |
| 0.772767 |    |    |    | P  | P | P | P |
|          |    |    |    | A  |   |   |   |
| 2.023631 |    |    | *  | P  | P | P | P |
| 7.083459 |    | *  | ** | P  | M | P | P |
| 0.661919 |    | *  |    | P  | P | P | A |
| 0.496373 |    |    |    | P  | P | P | P |
| 3.5529   | *  | ** | *  | P  | P | P | P |
| 0.914572 |    | *  |    | M  | P |   | A |
|          |    | *  |    |    | P |   |   |
| 1.066205 |    |    |    | A  | P | A | P |
| 4.404313 |    |    | *  | P  | P | P | P |
| 0.413727 |    |    |    | P  | P | P | P |
| 0.37561  |    |    |    | P  | P | A | P |
| 1.276806 |    | *  |    | P  | P | P | P |
| 0.359563 |    |    |    |    |   |   | A |
| 0.731977 |    |    |    | A  | A | A | A |
| 1.002812 |    | *  |    | P  | P | P | A |
| 2.591399 |    |    | *  | P  | P | P | P |
| 2.043634 |    | *  | *  | P  | P | P | P |
| 3.341977 | *  | ** | *  | P  | A | P | P |
| 0.96957  |    |    |    | P  | P | A | A |
| 0.463511 |    |    |    | P  | P | P | P |
| 3.941812 |    |    | *  |    |   |   | P |
|          |    |    |    |    |   | A |   |
| 3.361736 |    |    | *  | P  | P | P | P |

|          |    |    |    |   |   |   |   |
|----------|----|----|----|---|---|---|---|
| 1.823759 |    | *  |    | P | P | P | P |
|          | ** |    |    | P |   |   |   |
|          |    | *  |    | M | A | P |   |
| 3.904173 |    |    | *  | P | P | P | P |
| 0.647936 |    |    |    | P | P | P | P |
| 0.684123 |    |    |    | P | P | P | P |
| 0.384961 |    |    |    | P | P | P | P |
| 0.499132 |    |    |    | P | P | P | P |
| 2.662343 |    |    | *  | P | P | P | P |
|          | *  |    |    | P |   |   |   |
| 2.200445 |    |    | *  | P | P | P | P |
|          | *  |    |    | M |   |   |   |
| 2.905566 |    | *  | ** | P | P | P | P |
| 0.399817 |    |    |    | P | P | P | P |
| 0.943049 |    | ** |    | P | P | P | A |
| 0.385293 |    |    |    | P | P | P | A |
| 0.087917 |    | *  |    |   | P | P | A |
| 2.778478 |    |    | *  | P | A | P | P |
| 0.423988 |    |    |    | P | P | P | P |
| 0.41156  |    |    |    | P | P | P | P |
|          |    |    |    | A |   |   |   |
| 2.158115 |    |    | *  | P | P | P | P |
| 1.507326 |    |    |    | P | P | P | P |
| 1.386983 |    |    |    | P | P | P | P |
| 4.198215 |    |    | *  | P | P | P | P |
| 0.217248 |    |    |    | P | P | P | A |
| 3.213267 |    |    | ** | P | P | P | P |
| 0.47737  |    |    |    | P | P | P | P |
| 0.858349 |    |    |    | P | P | P | P |
| 2.694341 |    | *  | *  | P | P | P | P |
| 0.091322 |    |    |    | P | P | A | A |
| 0.393604 |    |    |    | P | P | P | P |
| 0.378256 |    |    |    | P | P | P | P |
|          |    |    |    |   | A |   |   |
| 0.501495 | *  |    |    | P | P | P | P |
| 0.621869 |    |    |    |   | A | A | A |
| 0.642075 |    | *  |    | P | P | P | P |
|          |    | *  |    |   | A | P |   |
| 1.920983 |    | *  |    | P | P | P | P |
| 2.070137 |    |    | ** | P | P | P | P |

|          |    |    |    |    |   |   |   |
|----------|----|----|----|----|---|---|---|
|          | *  |    | *  | P  | P | P |   |
| 0.966559 |    |    |    | P  | P | P | P |
|          | *  |    |    | P  | A | A |   |
| 1.499909 |    |    | *  | P  | P | P | P |
| 2.375526 | *  |    | *  | P  | A | P | P |
| 0.647594 |    |    |    | P  | P | P | M |
| 0.391197 |    |    |    | P  | P | P | P |
| 1.615798 |    |    | *  | P  | P | P | P |
|          | *  |    |    | P  | A |   |   |
| 0.393398 |    |    |    |    |   | A | A |
| 0.420111 |    |    |    | P  | P | P | P |
| 0.958378 |    | ** |    |    | P | A | A |
|          |    | ** | ** |    | P | P |   |
| 1.375189 |    |    | *  | P  | P | P | P |
| 2.064512 |    |    | *  | P  | P | P | P |
|          |    |    | *  | A  | A | P |   |
| 1.891481 |    |    | ** | P  | P | P | P |
|          |    |    |    | A  |   |   |   |
| 1.246809 | *  |    | *  | P  | P | P | P |
| 2.33122  |    |    | *  | P  | P | P | P |
| 2.340205 |    |    | *  | P  | P | P | P |
| 0.12785  |    |    |    | M  | P | M | A |
| 3.056564 | *  |    | *  | ** | P | P | P |
| 0.367229 |    |    |    | P  | P | A | A |
| 3.135505 |    |    | *  | ** | P | P | P |
| 0.51082  |    |    |    | P  | P | A | P |
| 2.15152  |    |    | *  | P  | P | P | P |
| 2.535913 |    |    | *  | *  | P | P | P |
| 0.37214  |    |    |    | P  | P | P | A |
| 1.656    | *  |    |    | P  | P | P | M |
| 0.36706  |    |    |    | P  | P | P | P |
| 0.716506 |    |    | *  | P  | P | P | P |
| 1.049411 | ** |    |    | P  | A | A | A |
| 2.193253 |    |    | *  | P  | P | P | P |
| 2.543941 |    |    | *  | A  |   | M | P |
| 0.656094 |    |    |    | P  | P | P | P |
| 0.511881 |    |    |    | P  | P | P | P |
| 1.4301   | *  | *  |    | P  | P | P | P |
| 2.751152 |    |    | *  | P  | P | P | P |
| 0.460361 |    |    |    | P  | P | P | P |

|          |    |    |    |    |   |   |   |   |
|----------|----|----|----|----|---|---|---|---|
| 2.583272 |    |    | *  | *  | P | M | P | M |
|          | ** |    |    |    | P | A |   |   |
| 2.466672 |    |    |    | *  | P | P | P | P |
| 0.654098 |    |    |    |    | P | P | P | P |
| 0.249485 |    |    |    |    |   | P | A | A |
| 0.773641 |    |    |    |    | P | P | P | A |
| 2.94504  | *  | *  | ** | ** | P | P | P | P |
| 0.519813 |    |    |    |    | P | P | P | P |
|          |    |    |    |    |   | P | A |   |
| 4.106575 |    |    |    | *  | M | A | A | P |
| 2.125136 |    |    | *  | *  |   |   | P | P |
| 0.057788 |    |    |    |    |   |   |   | A |
| 1.695217 |    | *  | *  |    | P | P | P | P |
| 0.436246 |    |    |    |    | P | P | P | P |
| 0.03584  |    |    |    |    | A | P | A | A |
| 3.732541 | *  |    | *  | *  | P | P | P | P |
| 2.580464 |    |    |    | *  |   |   |   | P |
| 0.424478 |    |    |    |    |   |   | A | A |
| 4.625257 |    |    | *  | *  | P | P | P | P |
| 3.222111 |    |    |    | ** | P | P |   | P |
| 0.426281 |    |    |    |    | P | P | P | P |
| 1.030552 |    |    |    |    | P | P | P | A |
|          |    | ** |    |    | P | P |   |   |
| 0.083579 |    |    |    |    | A | M |   | A |
|          |    |    |    |    | P | P | P |   |
|          |    |    |    |    | P | M | A |   |
|          |    |    |    |    | P | P | P |   |
| 0.359269 |    |    |    |    | P | P | P | P |
| 0.799087 |    |    |    |    | P | P | P | P |
| 3.528763 |    |    |    | *  | P | P | P | P |
|          |    |    |    |    | P | A |   |   |
| 0.415253 |    |    |    |    | P | P | P | M |
| 0.589279 |    |    |    |    | P | P | P | P |
| 0.428859 |    |    |    |    | P | P | P | P |
| 4.46117  |    |    | ** | *  | P | P | P | P |
| 3.225757 |    |    | *  | ** | P | P | P | P |
|          |    |    |    |    | P | A | A |   |
| 1.338479 |    |    |    |    | P | P | A | P |
|          |    |    |    |    | P | P | P |   |

|          |    |    |    |    |   |   |   |   |
|----------|----|----|----|----|---|---|---|---|
| 0.100719 |    | *  |    |    | P | P |   | A |
| 3.057358 |    |    |    | ** | P | P | P | P |
|          |    |    |    |    | M | P | A |   |
| 1.431378 |    | ** |    |    | P | P | P | P |
| 1.19512  |    |    |    |    | P | P | P | A |
| 3.815817 | *  |    |    | *  | P | P | P | P |
| 0.457542 |    |    |    |    | P | P | P | P |
| 0.456585 |    |    |    |    | P | P | P | P |
| 2.062044 |    |    |    | *  | P | P | P | P |
| 2.56741  | ** |    | ** | *  | P |   | P | P |
| 1.305285 |    |    | *  |    | P | P | P | P |
|          |    |    |    |    |   | A |   |   |
| 3.313437 |    | *  | *  | *  | P | P | P | P |
|          | ** |    |    |    | P |   |   |   |
| 2.771259 |    |    |    | *  | P | P | P | P |
| 0.343248 |    |    |    |    | P | P | P | P |
| 2.385182 |    |    | *  | *  | P | P | P | P |
| 0.620765 |    |    |    |    | P | P | P | P |
| 0.375971 |    |    |    |    | P | P | P | P |
|          |    |    |    |    | A | A |   |   |
| 0.424777 |    |    |    |    | P | P | P | P |
|          |    |    | ** |    | P | A | P |   |
|          |    |    | ** |    |   |   | P |   |
| 1.003874 |    | *  |    |    |   | A |   | A |
| 9.222591 |    |    |    | ** |   |   |   | P |
| 0.195477 |    |    |    |    | P | P | P | P |
| 2.280893 |    |    |    | *  | P | P | P | P |
| 0.284759 | ** |    |    |    | P | P | P | A |
| 0.297277 |    |    |    |    | P | P | P | P |
| 0.461708 |    |    |    |    | P | P | P | P |
|          |    |    |    |    | A | P |   |   |
| 1.789713 |    |    | *  |    | P | P | P | P |
| 0.777952 | *  |    |    |    | P | P | P | P |
| 0.153454 |    |    |    |    | P | P | P | P |
| 0.055147 |    |    |    |    | P | P | P | A |
|          |    | ** |    |    | P | P | P |   |
| 4.087299 |    |    |    | *  | M |   |   | P |
| 2.941821 |    |    |    | ** | P | P | P | P |
| 0.968667 |    |    |    |    | P | P | P | P |
| 0.398446 |    |    |    |    | P | P | P | P |

|          |    |    |    |    |   |   |   |
|----------|----|----|----|----|---|---|---|
| 3.333798 |    |    | *  | M  | M |   | P |
| 0.687519 |    |    |    | P  | P | P | P |
| 0.612739 |    |    |    | P  | P | P | P |
|          |    | *  |    | P  | M |   |   |
| 1.773996 |    |    | *  | P  | P | P | P |
| 0.175917 |    |    |    | P  | P | P | A |
| 2.087897 |    |    |    | *  | P | P | P |
| 2.293184 |    |    |    | *  | P | P | P |
| 2.617751 |    |    |    | *  | P | P | P |
| 4.733684 |    | ** |    | *  | P | P | P |
| 0.471548 |    |    |    |    | P | P | P |
| 0.423451 |    |    |    |    | P | P | P |
| 0.407454 |    |    |    |    | P | P | P |
| 2.2951   | ** |    |    | *  | P | P | P |
| 0.141232 |    |    |    |    | P | P | A |
| 3.374297 |    |    | *  | *  | P | P | P |
| 0.282278 |    |    |    |    |   |   | A |
|          |    | ** |    |    | P |   | M |
| 2.553623 |    |    |    | *  | M | P | A |
| 0.800629 |    |    |    |    | P | P | P |
| 0.46246  |    |    |    |    | P | P | P |
| 0.414753 |    |    |    |    | P | P | P |
| 51.76439 | ** |    |    | ** | P |   | P |
| 3.431669 |    |    |    | *  | P | P | P |
| 4.710387 |    | *  | ** | *  | P | P | P |
| 2.754165 |    |    |    | *  | P | P | P |
| 3.03161  |    |    |    | ** | P | P | P |
| 3.63681  |    |    |    | *  | P | M | P |
| 0.645506 | *  |    |    |    | P | P | P |
| 2.210855 |    |    |    | *  | P | P | P |
| 0.87285  |    |    |    |    | P | P | P |
|          |    |    |    |    | P | P | A |
| 0.284329 |    |    |    |    | P | P | P |
| 0.865195 |    |    | *  |    | P | P | P |
| 0.50473  |    |    |    |    | P | P | P |
|          | *  |    |    |    | P | A | P |
| 0.610054 |    |    |    |    | A | P | A |
|          |    |    |    |    | A |   |   |
| 0.427115 |    |    |    |    | A | A |   |
| 1.738308 |    |    | *  |    | P | P | P |

|          |    |    |    |    |   |   |   |   |
|----------|----|----|----|----|---|---|---|---|
| 0.251397 |    |    |    |    | P | P | A | A |
|          |    |    |    |    | A |   |   |   |
| 1.522174 |    |    | *  |    | P | P | P | P |
|          |    |    | ** |    |   |   | P |   |
|          |    |    |    |    | A |   |   |   |
| 1.146189 | *  | *  |    |    | P | P | P | P |
| 0.337183 |    |    |    |    | P | P | P | P |
| 0.461752 |    |    |    |    | P | P | P | P |
| 0.058536 |    |    |    |    | P | P | P | A |
| 0.942944 | *  | *  |    |    | P | P | P | P |
| 0.129005 |    |    |    |    | P |   |   | P |
| 0.406553 |    |    |    |    | P | P | P | P |
|          |    |    | *  |    |   | P | P |   |
| 1.474609 |    |    |    |    | P | A | A | A |
| 0.325359 |    |    |    |    | P | P | P | P |
|          |    |    |    |    | A |   | M |   |
| 2.836359 |    |    | *  | *  | P | P | P | P |
| 17.16753 |    |    |    | ** | P | A | A | P |
|          |    |    |    |    |   |   | A |   |
| 0.505219 |    |    |    |    | P | P | P | A |
|          |    |    |    |    |   |   | A |   |
| 1.470037 |    |    |    |    | P | P | P | P |
| 0.396298 |    |    |    |    | P | P | P | P |
| 0.41995  |    |    |    |    | P | P | P | P |
| 0.383184 |    |    |    |    | P | P | P | P |
|          |    | ** |    |    | P | P | A |   |
| 2.019771 |    | *  | *  | *  | P | P | P | P |
| 0.326021 | ** |    |    |    | P | P | M | A |
| 2.219054 |    |    |    | *  | P | P | P | P |
| 0.503429 |    |    |    |    | P | P | P | P |
| 1.009108 |    |    | *  |    | P | P | P | M |
| 2.054908 |    | *  | ** | *  | P | P | P | P |
| 0.575683 |    |    |    |    | P | P | P | P |
| 2.733166 |    |    |    | *  | P | P | P | P |
| 2.11203  |    |    |    | *  | P | P | P | P |
| 0.859136 |    |    |    |    | P | P | P | P |
|          |    |    |    |    |   |   | A |   |
| 0.759627 |    |    |    |    | P | P | P | P |
| 4.30689  |    |    | ** | *  | P | P | P | P |
| 34.59472 |    |    |    | ** |   |   |   | P |

|          |    |    |    |   |   |   |   |
|----------|----|----|----|---|---|---|---|
| 0.671047 |    |    |    | P | P | P | P |
| 0.338208 |    |    |    | P | P | P | P |
|          |    | ** |    | A | P | P |   |
| 0.48929  |    |    |    | P | P | P | A |
| 3.547934 |    |    | *  | * | P | P | P |
| 2.211904 |    |    |    | * | P | P | P |
| 0.675856 | ** |    |    |   | P | P | P |
|          |    |    |    |   | P | P | A |
| 2.094493 |    |    |    | * | P | P | P |
| 0.510956 |    |    |    |   | P | P | P |
|          |    | *  |    |   | P | P | A |
| 0.806288 |    |    |    |   | P | P | P |
| 0.810815 |    |    |    |   | P | A | A |
| 6.019977 |    |    | *  | * | P | A | P |
| 1.890454 |    |    | ** |   | P | P | P |
| 0.598818 |    | *  |    |   | P | P | A |
| 2.083157 |    |    |    | * | P | P | P |
| 1.480266 |    |    |    |   | P |   | A |
| 0.907403 |    |    |    |   | P | P | P |
| 5.907765 |    |    |    | * |   |   | P |
| 0.971447 |    |    | *  |   | A |   | P |
| 2.114414 |    |    |    | * | P | P | P |
| 3.687262 |    |    | *  | * | P | P | P |
| 2.726502 |    |    |    | * | P | P | P |
| 2.262731 |    |    |    | * | P | P | P |
| 1.697295 |    | *  |    |   | M | P | P |
| 1.430952 | *  |    |    |   | P | P | P |
| 1.268696 |    |    |    |   | P | P | P |
| 0.465208 |    |    |    |   | P | P | P |
| 0.209477 |    |    |    |   | P | P | P |
| 0.292186 |    |    | *  |   | P | A | P |
| 1.811644 |    |    | *  |   | P | P | P |
| 0.835381 | ** |    |    |   | P | A | A |
| 0.49933  |    |    |    |   | P | P | P |
| 1.692592 |    |    |    |   | P | P | P |
| 1.620454 |    |    |    |   | P | P | A |
| 1.810833 | ** |    |    |   | P | A | P |
| 0.733549 |    |    |    |   | P | P | A |
| 0.30485  |    |    |    |   | P | P | P |
| 0.285956 |    |    |    |   | P | P | P |



|          |    |    |    |   |   |   |   |
|----------|----|----|----|---|---|---|---|
| 0.52516  |    |    |    | P | P | P | P |
| 0.468164 |    |    |    | P | P | P | P |
| 0.47233  |    |    |    | P | P | P | P |
|          |    |    |    |   | A |   |   |
| 0.169877 |    |    |    | P | P | A | A |
| 3.514476 | *  |    | *  | P |   |   | P |
| 0.276443 |    |    |    | P | P | P | P |
| 0.015748 |    |    |    | P | P | A | A |
| 3.444684 |    | *  | *  | P | P | P | P |
|          | *  |    |    | P |   |   |   |
| 3.062752 |    |    | ** |   |   |   | M |
| 3.543962 |    |    | *  |   |   |   | A |
| 0.408982 |    |    |    | P | P | P | P |
| 2.519892 |    |    | *  | P | P | P | P |
| 0.210126 |    |    |    | P | P | P | P |
| 1.022584 |    |    |    | A | P | A | A |
| 0.424856 |    |    |    | P | P | A | A |
| 3.113497 |    |    | ** | P | P | P | P |
| 0.405744 |    | ** |    | P | P | P | A |
| 2.403959 |    |    | *  | P | P |   | P |
| 3.833925 |    | ** | *  | P | P | P | P |
| 1.479426 |    |    |    | P | P | P | P |
| 0.736807 |    | *  |    | P | P | P | P |
| 2.65112  |    | ** | *  | M |   | P | P |
| 2.388086 |    |    | *  | P | P | P | P |
| 6.238506 | ** | ** | *  | P | P | P | P |
|          |    |    |    | A |   |   |   |
| 0.154269 |    |    |    |   |   | A | A |
| 0.442536 |    |    |    | P | P | P | A |
| 0.577791 | *  |    |    | P | P | P | P |
| 0.490882 |    |    |    | A | P | A | A |
| 3.262031 |    | *  | *  | P | P | P | P |
| 1.175018 |    |    |    | A |   | A | A |
| 0.338842 |    |    |    | P | P | P | P |
| 0.648247 |    |    |    | P | P | P | P |
| 0.701882 |    |    |    | P | P | P | P |
|          |    |    |    |   | A | P |   |
|          |    |    |    | M | A | A |   |
| 0.205149 |    |    |    | P | P | P | P |
| 2.71906  |    |    | *  | P | P | M | M |

|          |    |    |    |   |   |   |   |
|----------|----|----|----|---|---|---|---|
| 0.45106  |    |    |    | P | P | P | P |
| 0.296505 |    |    |    | P | P | P | P |
| 4.018166 |    |    | *  | P | P | P | P |
| 0.239609 |    |    |    |   |   |   | A |
|          |    |    |    | P | P | A |   |
| 1.466337 |    | *  |    | P | P | P | P |
|          | *  |    |    |   | M |   |   |
| 2.089587 |    |    | *  | P | P | P | P |
| 2.142422 | *  | ** | *  | P | P | P | P |
| 16.3291  |    |    | ** | P | P | A | M |
| 0.073693 |    |    |    | P |   |   | A |
| 0.19716  |    |    |    | P | P | P | A |
| 0.595952 |    |    |    | P | P | P | P |
| 0.972456 |    |    |    | P | P | P | P |
| 1.351257 |    | ** |    | P | P | P | P |
| 1.256758 |    |    |    | P | P | P | P |
| 0.449402 |    |    |    | P | P | P | P |
| 2.980785 |    |    | ** |   | P | A | P |
| 0.492611 |    |    |    | P | P | P | P |
| 0.345474 |    |    |    | P | P | P | A |
|          | *  |    |    | P |   | A |   |
|          |    |    |    | A |   |   |   |
|          |    |    |    |   | A |   |   |
| 0.662599 |    |    |    | P | P | P | P |
| 1.936562 |    | ** |    | P | P | P | P |
| 1.46699  | ** |    |    | P | P | P | P |
| 0.40899  |    |    |    | P | P | P | P |
| 0.74586  |    |    |    | P | P | P | P |
| 0.100618 |    |    |    |   | M | P | A |
| 9.342858 |    | ** | ** | P | P | P | P |
| 0.31018  |    |    |    | P | A |   | A |
|          | *  | ** |    | P |   | P |   |
| 4.221434 |    |    | *  | P | P | P | P |
| 3.8217   |    | *  | *  | P | P | M | P |
|          | ** |    |    | P |   | M |   |
| 0.422183 |    |    |    | P | P | P | A |
| 1.046829 | *  |    |    | P | P | P | M |
| 2.107756 |    |    | *  |   | A |   | A |
| 0.81398  |    | *  |    |   | P | P | A |

|          |    |   |    |    |   |   |   |   |
|----------|----|---|----|----|---|---|---|---|
| 1.991492 |    |   | *  |    | P | P | P | P |
| 81.13336 |    |   |    | ** |   | A | P | P |
| 0.403255 |    |   |    |    | P | P | P | P |
|          | *  |   | *  |    | P | P | M |   |
| 0.290985 |    |   | ** |    | P | P | P | M |
| 2.225469 |    |   |    | *  | P | P | P | P |
| 1.291786 |    |   | *  |    |   |   | P | P |
|          |    |   |    |    |   | M | P |   |
| 2.591845 |    |   | ** | *  |   | P | P | M |
|          | ** |   |    |    | P |   |   |   |
| 0.136313 |    | * |    |    | P | P | A | A |
|          |    |   |    |    | P | A | A |   |
| 2.134389 |    |   |    | *  | P | P |   | M |
| 0.334548 |    |   |    |    | P | P | P | M |
| 1.708704 |    |   |    |    | P | A | A | P |
| 0.25183  |    |   |    |    | P | P | P | P |
|          |    |   |    |    |   | A | A |   |
|          |    |   |    |    |   | A |   |   |
| 0.458194 |    |   |    |    | P |   |   | A |
| 0.461565 |    |   |    |    | P | P | P | P |
| 0.626456 |    |   |    |    | P | P | A | P |
| 2.005996 |    |   |    | *  | P | P | P | P |
| 0.528781 |    |   |    |    | P | P | P | P |
| 2.4634   |    |   | *  | *  | P | P | P | P |
| 2.597449 |    |   |    | *  | A | P | P | P |
| 0.862686 |    |   |    |    | P | P | P | A |
| 2.296872 |    |   |    | *  | A |   |   | P |
| 0.495898 |    |   |    |    | P | P | P | P |
|          |    | * |    |    | P | P | M |   |
| 0.340778 |    |   |    |    | P | P | P | A |
| 1.390444 | *  |   |    |    | P | P | P | P |
| 0.389271 |    |   |    |    | P | P | P | P |
| 1.056765 |    |   |    |    | P | P | P | P |
| 0.958821 | *  |   |    |    | P | P | P | P |
| 1.779499 |    |   | *  |    | P | P | P | P |
| 1.56846  |    |   | *  |    | P | P | P | P |
| 3.861555 | ** | * | *  | *  | P | P | P | P |
| 0.411185 |    |   |    |    | P | P | P | P |
| 2.494501 |    |   | ** | *  | P | P | P | P |
| 0.707453 |    |   |    |    | P | P | P | P |

|          |    |    |   |   |   |   |   |
|----------|----|----|---|---|---|---|---|
| 0.259255 |    |    |   | P | P | P | A |
| 0.639187 |    |    |   | P | P | P | P |
| 5.077252 |    | *  | * | P | P | P | P |
| 1.543787 |    | *  |   | P | P | P | P |
| 0.281321 |    |    |   | P | P | P | P |
|          |    |    |   |   | A | A |   |
| 5.793366 |    | ** | * | P | M | P | P |
| 1.227749 |    | *  |   | P | P | P | M |
|          |    | *  |   | P | A | P |   |
| 0.730522 |    |    |   | P | P | P | P |
| 0.620312 |    |    |   | P | P | P | P |
| 0.466002 |    |    |   | P | P | P | P |
| 1.737787 |    | ** |   | P | P | P | P |
| 0.888503 |    | *  |   | P | P | P | P |
| 1.607075 |    | ** |   | P | P | P | P |
| 0.389549 |    |    |   | P | P | P | P |
| 0.419654 |    |    |   | P | P | P | P |
| 1.191404 |    |    |   | P | P | P | P |
| 0.417831 |    |    |   | P | P | P | P |
| 0.711301 | *  |    |   | P | P | P | P |
| 0.516452 |    |    |   |   | M | A | A |
|          |    |    |   | M |   |   |   |
| 3.689376 |    |    | * | P | P | P | P |
|          | *  | *  | * | P | P | P |   |
| 3.257579 |    |    | * | P | P | P | P |
| 0.717136 |    |    |   | P | P | P | P |
| 1.796338 |    |    |   | P | P | A | P |
|          | ** |    |   | P |   |   |   |
|          | ** |    | * | P | A | M |   |
| 0.30196  |    |    |   | P | P | P | P |
| 4.309831 |    |    | * | P | P | P | P |
|          |    |    |   |   | A |   |   |
|          | *  | *  |   | P | P | M |   |
| 1.086113 | *  |    |   | P | P | P | P |
| 0.210487 |    |    |   | P | P | P | P |
| 2.557143 |    |    | * | A |   | A | M |
| 1.374017 |    |    |   | P | P | P | P |
| 0.436812 |    |    |   | P | P | P | A |
|          |    |    |   |   | A | A |   |
| 2.096396 |    |    | * | A | P | A | M |

|          |    |    |    |    |   |   |   |   |
|----------|----|----|----|----|---|---|---|---|
|          |    | *  |    |    | A | P | P |   |
| 1.330838 |    |    | *  |    | P | A | A | P |
| 5.562644 |    |    | ** | *  | P | P | P | P |
| 2.066794 |    |    |    | *  | P | P | P | P |
| 2.715321 | *  | ** |    | *  | P | M |   | P |
| 1.041529 |    |    |    |    | P | P | P | A |
| 2.027522 |    |    | *  | *  | P | P | P | P |
| 1.38766  |    |    | *  |    | P | P | P | P |
| 0.945588 |    |    |    |    | P | P | P | P |
| 2.721187 | ** | *  | *  | *  | P | P | P | P |
|          |    | *  |    |    | P | P | P |   |
| 0.093966 |    | *  |    |    |   | P |   | A |
| 0.404174 |    |    |    |    | P | P | P | P |
| 0.22555  | *  |    |    |    | P | P | M | P |
| 0.445824 |    |    |    |    | P | P | P | P |
| 0.453123 |    |    |    |    | P | P | P | P |
| 2.371835 | *  |    |    | *  | P | P | P | P |
| 2.393824 | *  |    |    | *  | P | P | P | P |
| 2.98773  |    |    |    | ** | P | P | P | P |
|          |    |    |    |    | P | P | A |   |
|          |    |    |    |    | A | P | A |   |
| 1.283984 | *  |    |    |    | P | P | P | P |
| 2.971282 |    |    | ** | ** | P | P | P | P |
| 6.680314 | *  | *  | *  | ** | P | P | P | P |
| 32.17386 |    |    | ** | ** |   |   | P | P |
| 2.81755  | *  |    | *  | *  | P | P | P | P |
|          |    |    |    |    | A |   |   |   |
| 0.776113 |    |    |    |    | P | P | P | P |
|          |    |    | ** |    |   |   | P |   |
| 0.112482 |    |    |    |    | P |   | A | A |
| 0.244277 |    |    |    |    | P | P | P | P |
| 2.587188 | *  |    | ** | *  | P | P | P | P |
| 1.099256 |    |    |    |    | P | P | P | A |
| 0.673435 |    |    | *  |    | P | P | P | P |
|          |    |    |    |    | A | P | A |   |
| 2.183767 |    |    |    | *  | P | P | P | M |
|          | *  |    |    |    | P |   |   |   |
| 3.013552 |    |    | *  | ** | P | P | P | P |
| 4.307387 |    |    | *  | *  | P | M | P | P |
| 0.181603 |    |    |    |    | M | A |   | A |

|          |    |    |   |    |   |   |   |
|----------|----|----|---|----|---|---|---|
| 0.497994 |    |    |   | P  | P | P | P |
| 62.0682  |    | *  |   | ** | P | P | A |
| 24.67871 |    |    |   | ** |   |   | P |
| 5.729495 |    |    |   | *  | A | P | M |
| 2.808327 |    |    | * | *  | P | P | P |
| 2.723051 |    |    |   | *  | P | P | P |
| 4.152802 |    |    | * | *  | P | P | P |
| 0.455885 |    |    |   |    | P | P | P |
| 0.43688  |    |    |   |    | P | P | P |
| 0.192164 |    |    |   |    | P | P | P |
| 0.465269 |    |    |   |    | P | A | A |
| 1.543646 | ** |    |   |    | P | P | P |
| 0.61954  |    |    |   |    | P | P | M |
| 0.734389 | *  |    |   |    | P | P | P |
| 1.353391 | *  |    | * |    | P | P | P |
| 0.743791 | *  |    |   |    | P |   | A |
| 0.990331 |    |    |   |    | P | A | P |
|          |    |    |   |    |   | A |   |
| 2.091926 |    |    |   | *  | P | P | P |
| 3.085645 |    |    | * | ** | P | P | P |
| 1.769403 |    |    | * |    | P | P | P |
| 0.377319 |    |    |   |    | P | P | P |
| 0.209064 |    |    |   |    | P | P | P |
| 0.491095 |    |    |   |    | P | P | P |
| 0.480363 |    |    |   |    | P | P | P |
| 6.167373 |    |    | * | *  | P | P | P |
| 0.78435  | *  |    |   |    | P | P | A |
| 0.686239 |    |    |   |    | P | A | A |
| 7.244535 |    |    |   | ** |   |   | P |
| 1.626808 |    |    | * |    | P | P | P |
| 0.438823 |    |    |   |    | P | P | P |
|          |    |    |   |    | A |   |   |
| 2.280961 |    |    |   | *  | P | P | P |
| 1.055232 |    |    |   |    | P | P | P |
| 0.249826 |    |    |   |    | P | P | P |
| 2.690597 |    |    | * | *  | P |   | P |
| 0.384421 |    |    |   |    | P | P | P |
|          |    |    |   |    |   |   | A |
|          |    | ** |   |    |   | M |   |
|          |    | *  |   |    | P | P |   |

|          |   |    |    |   |   |   |   |
|----------|---|----|----|---|---|---|---|
|          |   |    |    | A |   |   |   |
| 1.967263 |   | *  |    | P | P | P | P |
| 2.620431 |   |    | *  | P | P | P | P |
| 0.400449 |   |    |    | P | P | P | P |
| 0.482091 |   |    |    | P | P | P | A |
| 0.42191  |   |    |    | P | P | A | A |
| 0.442541 |   |    |    | P | P | P | P |
| 2.149485 |   |    | *  | P | P | P | P |
| 2.938818 |   | *  | ** | P | P | P | P |
| 1.731606 |   | *  |    | P | P | P | P |
| 2.855637 |   |    | ** | P | P | P | A |
|          |   |    |    |   | A | P |   |
| 2.47747  |   |    | *  | P | P | P | P |
| 21.66716 |   |    | ** | P |   |   | P |
| 13.54246 |   |    | ** | P |   |   | P |
|          |   |    |    | A |   |   |   |
| 1.514605 |   | *  |    | P | P | P | P |
| 1.229023 | * |    |    | P | P | P | P |
|          | * | ** |    | P | P |   |   |
| 0.413308 |   |    |    | P | P | P | A |
| 2.115109 |   |    | *  | P | P | P | P |
| 1.415489 |   | ** |    | P | P | P | P |
| 0.536587 |   |    |    | P | P | P | P |
| 0.442316 |   |    |    | P | P | P | P |
| 0.43482  |   |    |    | P | P | P | P |
| 0.335771 |   |    |    | P | P | P | P |
| 0.668494 |   |    |    | P | P | P | P |
| 0.440807 |   |    |    | P | P | P | P |
| 9.457492 |   |    | ** | A |   |   | P |
| 2.045404 |   |    | *  | P | P | P | P |
| 0.171616 |   |    |    | P | P | M | A |
| 1.06236  |   |    |    | P | P | P | P |
|          | * |    |    | P |   |   |   |
| 2.008225 |   |    | *  | P | P |   | P |
|          |   |    |    | P | P | A |   |
| 0.470543 |   |    |    | P | P | P | P |
| 0.486278 |   |    |    | P | P | P | P |
|          |   |    |    |   | A |   |   |
| 1.274721 | * | ** |    | P | P | P | P |
|          |   |    |    | P | P | A |   |

|          |    |   |    |    |   |   |   |   |
|----------|----|---|----|----|---|---|---|---|
| 2.097602 | *  |   |    | *  | P | P | P | P |
| 0.486678 |    |   |    |    | P | P | P | A |
| 2.115697 |    | * | ** | *  | P | P | P | P |
| 0.492385 |    |   |    |    | P | P | A | A |
| 0.548583 |    |   |    |    | A | P | A | M |
| 0.882121 | *  |   |    |    | P | P | P | A |
| 0.677971 |    |   |    |    | P | P | P | P |
| 2.620785 | *  |   |    | *  | P | P | P | P |
| 3.165117 |    |   | *  | ** | P | P | P | P |
| 0.096783 |    |   |    |    | P | P | P | A |
| 0.523042 |    |   |    |    | P | P | P | P |
| 1.627479 |    |   | *  |    | P | P | P | P |
| 1.960559 |    |   | *  |    | P | P | P | P |
| 2.537393 |    |   |    | *  | P | P | P | P |
| 0.463819 |    |   |    |    | P | P | P | P |
| 0.699572 | ** |   |    |    | P | P | P | P |
| 3.097738 |    |   |    | ** | P | P | P | P |
| 1.973045 |    |   | *  |    | P | P | P | P |
| 0.085996 | *  |   |    |    | P | P | A | A |
|          | ** |   |    |    | P | P | A |   |
| 0.945796 |    |   |    |    | P | P | P | P |
| 0.330533 |    |   |    |    |   | A |   | A |
| 0.455682 |    |   |    |    | P | P | P | P |
| 0.35315  |    |   |    |    | P | P | P | A |
| 0.273777 |    |   |    |    | P | P | P | P |
| 0.256782 |    |   |    |    | P | P | P | P |
| 3.23815  |    |   | *  | *  | P | P | P | P |
| 5.012141 |    |   | *  | *  | P | P | P | P |
| 1.888108 |    |   | ** |    | P | P | P | P |
| 5.650423 |    |   | *  | *  | P | P | P | P |
| 2.697089 |    |   | *  | *  | P | P | P | P |
| 2.839606 |    |   | *  | *  | P | P | P | P |
| 3.302813 |    |   | *  | *  | A | A | P | P |
| 0.485696 |    |   |    |    | P | P | P | M |
| 0.513269 |    |   |    |    |   |   | A | A |
| 1.966149 |    |   | *  |    | P | P | P | P |
| 0.488298 |    |   |    |    | P | P | P | P |
| 0.852752 | ** |   |    |    | P | P | P | A |
| 0.443332 |    |   |    |    | P | P | P | P |
| 4.914649 |    |   | *  | *  | P | P | P | P |



|          |    |    |    |    |   |   |   |   |
|----------|----|----|----|----|---|---|---|---|
| 4.2496   | *  | *  | ** | *  | P | P | P | P |
|          |    |    |    |    | A | A | A |   |
| 0.527899 |    |    |    |    | P | P | P | P |
| 0.659311 |    |    |    |    | P | P | P | P |
|          | ** |    |    |    | P | A | P |   |
| 0.116661 |    |    |    |    |   | A |   | A |
| 24.75504 | ** |    | *  | ** | P |   | P | P |
| 1.052335 | *  |    |    |    | P | A | A | A |
| 2.07041  | *  |    | *  | ** | P | P | P | P |
| 0.382759 |    |    |    |    | P | P | P | P |
| 2.635649 | *  |    | *  | *  | P | P | P | P |
|          |    | *  | ** |    | P | P | P |   |
| 5.605566 |    |    |    | *  | A | A | P | P |
| 119.0426 |    |    | ** | ** | P | P | P | P |
| 0.519216 |    |    |    |    | P | P | A | A |
| 2.036603 |    |    |    | *  | P | P | P | P |
| 4.059942 |    |    | *  | *  | P |   | P | P |
|          |    |    |    |    | A |   |   |   |
| 0.082472 |    | *  |    |    | P | P | P | A |
| 0.26852  |    |    |    |    | P | P | P | P |
| 0.339494 |    |    |    |    | P | P | P | P |
|          |    |    |    |    |   | A |   |   |
|          | *  |    |    |    | P |   |   |   |
| 0.295513 |    |    |    |    | P | P | P | A |
| 1.320422 |    | *  |    |    | A | P |   | A |
| 2.342817 |    |    |    | *  |   |   | P | A |
| 0.451359 |    |    |    |    | P | P | P | P |
| 0.454525 |    |    |    |    | P | P | A | A |
|          |    |    |    |    |   |   | A |   |
|          | *  |    |    |    | P |   |   |   |
| 0.093448 |    |    |    |    | P |   |   | A |
|          |    | *  |    |    |   | P |   |   |
| 1.926134 |    |    | *  |    | P | P | P | M |
|          |    | *  |    |    |   | P | P |   |
| 0.876072 |    |    |    |    | P | P | A | A |
|          |    |    |    |    | A |   |   |   |
| 1.331509 |    |    |    |    | P | P | P | P |
|          |    | ** |    |    |   | P |   |   |
| 0.955744 |    |    |    |    | A | A |   | A |
|          |    |    |    |    |   |   | A |   |

|          |    |    |    |   |   |   |   |
|----------|----|----|----|---|---|---|---|
| 1.100227 |    |    |    | P | P | A | A |
|          |    | ** |    | P |   | P |   |
| 1.400403 |    |    |    | P | P | P | P |
| 3.700459 | ** | *  | *  | P | P | P | P |
| 7.572843 |    |    | ** |   | A |   | M |
| 0.864641 |    |    |    |   | A | P | P |
| 16.34281 |    |    | ** | P | P | A | P |
|          |    | *  |    | P | P |   |   |
|          | *  |    |    | P | P |   |   |
| 2.333492 |    | *  | *  | P | P | P | P |
|          |    | ** |    |   |   | P |   |
| 10.34904 |    |    | ** | P | A |   | P |
| 1.29665  |    | *  |    |   | P |   | A |
| 0.324827 |    |    |    |   |   |   | A |
| 2.748778 |    | *  | *  | P | P | P | P |
| 2.092069 |    |    | *  | P | P | A | A |
|          |    | *  |    | P | P | A |   |
| 8.991676 |    | ** | ** | A | P | P | P |
|          |    |    |    |   |   | A |   |
|          |    | *  |    |   | M |   |   |
| 48.80223 |    |    | ** |   |   |   | P |
| 7.051243 |    |    | ** |   |   |   | M |
| 0.686511 |    |    |    | P | P | P | P |
| 0.36002  |    |    |    | P | P | P | A |
| 2.026059 |    |    | *  |   |   |   | P |
| 0.397302 |    |    |    |   |   | A | A |
|          |    | ** |    | A |   | M |   |
| 0.369523 | ** |    |    | P | P | P | P |
|          |    | *  |    | M | M | P |   |
| 20.59094 |    |    | ** |   |   |   | P |
| 0.495792 |    |    |    | P | P | A | A |
| 1.950034 |    |    |    | P | P | A | A |
| 0.826997 |    |    |    | P | P | P | P |
|          |    |    |    | P |   | A |   |
| 2.001909 |    | *  | *  | P | P | P | P |
| 0.42728  |    |    |    | P | P |   | A |
| 1.126193 | *  |    |    | P | P | P | P |
|          |    |    |    |   | M | A |   |
|          |    | *  |    |   | A | A |   |
| 0.450274 |    |    |    | P | P | P | P |

|          |    |    |    |   |   |   |   |
|----------|----|----|----|---|---|---|---|
| 2.443385 |    |    | *  | P | P | P | P |
| 0.821681 |    |    |    | A |   |   | A |
| 1.451001 |    |    |    | P | A | A | A |
| 0.17309  |    |    |    | P | A |   | A |
| 1.059547 |    |    |    | P | P | A | P |
| 0.428453 |    |    |    | P | P | P | P |
|          |    |    |    |   |   | A |   |
| 0.110012 |    |    |    | P | P | A | A |
| 2.906325 |    | *  | ** | P | P | P | P |
| 0.254484 |    |    |    | P | P | A | A |
|          |    |    |    | A |   |   |   |
|          | ** |    |    | M | A |   |   |
| 1.480758 | *  |    |    | P | P | P | P |
| 0.887932 |    |    |    | P | P | P | A |
| 0.40531  |    |    |    | P | P | P | P |
| 9.311782 |    |    | ** |   |   |   | P |
| 0.702717 |    |    |    | P | P | P | P |
| 2.614604 |    |    | *  | P | P | P | P |
| 0.692778 | ** |    |    | P |   |   | A |
| 3.120875 |    |    | ** | P | P | P | P |
|          | ** |    |    | M |   | A |   |
| 1.405766 |    | *  | *  | P | P | P | P |
|          |    |    | *  |   | A | P |   |
| 1.479563 |    |    | *  | P | P | P | M |
| 1.541468 |    |    | *  |   | P | P | P |
| 0.691641 |    |    |    | P | P | P | P |
| 2.795605 |    |    | *  | A |   |   | P |
| 3.328558 |    | *  | *  | A | P | A | P |
| 0.184328 |    |    |    |   | P |   | A |
| 1.104323 |    | ** |    | M |   | P | M |
| 2.074696 |    |    | *  | P | P | A | P |
|          |    |    |    | A |   |   |   |
| 2.055391 |    | *  | *  | P | P | P | P |
| 0.272023 | *  |    |    | M |   |   | A |
| 0.888471 |    |    |    | P | P | P | A |
| 0.185838 |    |    |    | P | P | P | A |
|          |    |    |    |   | A |   |   |
| 6.740546 |    |    | ** | A | A | A | M |
|          |    |    |    |   | A | A |   |
| 1.509384 |    | *  |    | P | P | P | P |

|          |    |   |    |   |   |   |   |
|----------|----|---|----|---|---|---|---|
| 0.333291 |    |   |    | P | P | P | P |
| 1.423753 | *  |   |    | P | P | P | P |
| 3.797358 |    | * |    | * | P |   | P |
| 2.005035 |    |   |    | * | P | A | M |
|          |    |   |    |   | P | A |   |
| 1.166984 |    |   |    | M | P | A | P |
| 2.431755 |    |   |    | * | P | P | P |
| 0.816285 |    |   |    |   | P | P | P |
|          |    | * |    |   |   | P |   |
| 0.26162  |    |   |    | P | P | P | P |
| 0.419411 |    |   |    | P | P | P | P |
| 0.346287 |    |   |    | P | P | P | P |
| 1.452368 |    |   |    | P | P | P | P |
| 0.126792 |    |   |    | P | P | P | P |
| 2.322979 |    |   | ** | * | P | P | P |
| 5.548574 |    |   |    | * |   | P | M |
| 0.43391  |    |   |    | P | P | A | A |
| 0.894598 |    |   |    | P | P | P | A |
| 1.03879  |    |   | *  |   |   | P | M |
| 0.326929 | *  |   |    | P | P | P | A |
| 4.913055 |    |   |    | * | P | M | P |
|          |    |   |    |   | P | A | A |
| 2.252468 |    |   |    | * | P | P | P |
| 0.312859 |    |   |    |   | P | P | P |
| 0.279229 |    |   |    |   | P | P | P |
| 0.792441 | *  |   |    |   | P | P | P |
| 1.338641 | *  |   | *  |   | P | P | P |
|          | ** |   |    |   | P |   |   |
| 0.046318 | ** |   | *  |   | P | P | P |
|          |    |   |    |   | A | A |   |
|          |    |   | ** |   | A |   | M |
|          |    |   |    |   |   | A |   |
|          |    |   |    |   |   | A |   |
| 1.759973 | *  |   |    | P | P | P | P |
| 0.585517 |    | * |    | P | P | P | P |
| 2.751927 |    |   |    | * | A | P | M |
|          | *  |   |    |   | P | P | A |
| 0.831218 |    |   |    |   | A | A | A |
|          |    | * |    |   |   | P |   |
|          |    |   |    |   | P | P | A |

|          |    |    |    |    |   |   |   |
|----------|----|----|----|----|---|---|---|
| 1.333233 |    |    |    | P  | P | A | A |
| 3.925888 |    |    | *  | P  | A | P | P |
| 0.651263 |    |    |    | P  | P | P | M |
| 0.505193 |    |    |    | P  | P | P | P |
| 0.243065 |    |    |    | P  | P | P | A |
| 3.274358 | ** |    | *  | *  | P | P | P |
| 1.865982 | *  |    |    |    | P | P | P |
| 1.448811 |    |    | *  |    | P | P | P |
|          |    | ** |    |    | A | P |   |
| 0.836545 |    |    |    |    | A | A | A |
| 0.820873 |    |    |    |    | P | P | P |
| 0.684751 |    | ** |    |    | P | P | A |
| 2.27395  | *  |    |    | *  | P | A | A |
|          |    |    |    |    |   | A |   |
|          |    |    |    | P  | A |   |   |
| 0.963212 |    |    |    | P  | P | P | P |
| 0.026865 |    |    |    | P  |   |   | A |
| 8.53281  |    |    |    | ** |   |   | P |
| 0.174496 |    |    |    |    | P | A | A |
| 2.405312 |    |    |    | *  | P | M | P |
|          |    |    |    |    | A |   |   |
|          |    | *  |    |    | A | P |   |
| 3.934269 |    | *  | *  | *  | P | P | P |
| 0.63031  |    | *  |    |    | P | P | A |
| 0.143026 |    |    |    |    | P | P | P |
| 2.388556 |    | *  | *  | *  | P | P | P |
| 1.996171 |    |    |    |    | P | P | P |
| 0.455467 |    |    |    |    | P | P | P |
| 2.065987 |    | ** | *  | *  | P | P | P |
| 0.069601 |    |    |    |    | P | P | A |
| 1.843396 |    | *  |    |    | P | P | P |
| 106.9012 |    |    | ** | ** |   |   | P |
|          | ** |    | ** |    | P | M |   |
| 0.264015 |    |    |    |    | P | P | P |
| 0.675731 |    |    |    |    | P | P | P |
| 0.474376 |    |    |    |    | P | P | P |
| 2.076942 |    | *  | *  | *  | P | P | P |
| 1.200195 |    |    |    |    | P | P | A |
| 0.374389 |    |    |    |    | P | P | P |
| 0.144796 |    |    |    |    | P | P | A |

|          |    |    |    |    |   |   |   |   |
|----------|----|----|----|----|---|---|---|---|
| 0.304587 |    |    |    |    | P | P | P | A |
| 0.788802 |    |    |    |    | P | P | P | P |
| 2.960145 |    |    | *  | ** | P | P | P | P |
| 0.576322 | ** |    |    |    | P |   |   | A |
| 0.326053 |    | ** |    |    |   | P |   | A |
| 0.26031  |    |    |    |    | P | P | P | A |
| 3.675989 |    |    |    | *  | A |   |   | P |
| 0.055438 |    |    |    |    |   | P | A | A |
| 2.472996 |    |    |    | *  | P | P | A | P |
| 0.359435 |    |    |    |    | P | P | P | A |
|          | *  |    |    |    | M | P |   |   |
| 0.563929 | *  |    |    |    | P | P |   | A |
| 2.593771 |    |    |    | *  | P | P | P | P |
|          |    | *  | ** |    |   | M | M |   |
|          |    |    |    |    |   |   | A |   |
| 2.522101 |    |    |    | *  | P | P | P | P |
| 0.14937  |    |    |    |    | P | P | P | P |
| 0.258347 |    |    |    |    | P | P | A | A |
| 0.17672  |    |    |    |    | P | P | P | P |
| 0.492801 |    |    |    |    | P | P | P | P |
| 0.661314 |    |    |    |    | P | P | P | P |
| 0.115482 |    |    |    |    | P | P | P | P |
|          |    | ** |    |    |   | P |   |   |
| 0.338186 |    |    |    |    | P | P | P | P |
|          | *  |    |    |    | P | P | A |   |
|          | *  |    |    |    | P | A | M |   |
| 0.023    | *  |    |    |    | P | P | P | A |
| 0.26516  |    |    |    |    | P | P | P | P |
| 0.891718 | *  |    |    |    | P | P | P | M |
| 3.228465 |    |    |    | ** | P | P | P | P |
| 0.274987 | *  |    |    |    | P |   |   | A |
| 0.672134 |    |    |    |    | P | P | P | P |
| 1.747955 |    |    | ** |    | P |   | P | M |
| 4.70788  |    | *  |    | *  | P | P | P | P |
| 6.838148 | *  |    | ** | ** | P | A | P | P |
| 0.449166 |    |    |    |    | P | P | P | P |
| 3.084495 |    |    |    | ** | P | P | P | P |
|          |    |    |    |    | A |   |   |   |
|          |    |    |    |    |   |   | A |   |
| 2.511243 |    |    |    | *  |   | A |   | P |

|          |    |    |    |   |   |   |   |
|----------|----|----|----|---|---|---|---|
| 2.238946 |    | *  | *  | P | P | P | P |
| 0.394751 |    |    |    | P | P | A | A |
| 2.099356 |    |    | *  | P | P | P | P |
| 2.266452 |    |    | *  | P | P | P | P |
| 5.263128 |    | *  | *  | P | P | P | P |
| 2.399455 |    | ** | *  | P | P | P | P |
| 2.423889 |    |    | *  | M |   |   | P |
| 2.849283 |    |    | ** | P | P | P | P |
| 2.679809 |    |    | *  |   |   |   | M |
|          |    | ** |    |   | M |   |   |
|          |    |    |    | A | A | A |   |
| 1.368219 | *  |    |    | P | P | P | P |
| 3.127637 |    |    | ** | A |   |   | P |
| 1.091486 |    | *  |    | P | P | P | P |
| 0.409464 |    | ** |    | P | P | A | A |
| 0.494267 |    |    |    | P | P | P | P |
| 2.255021 |    | *  | *  | A | P | P | P |
| 4.5735   |    | *  | *  | P | P | P | P |
| 2.03905  |    |    | *  | P | P | A | P |
| 0.315365 |    |    |    | P | P | P | P |
| 1.674713 | *  |    |    | P | P | M | A |
| 2.213382 |    |    | *  | P | P | P | P |
| 1.0759   | ** |    |    | P | P | A | P |
|          | *  |    |    | M |   |   |   |
| 2.66712  |    | *  | *  | P | P | P | P |
| 0.142742 |    |    |    | P | P | P | A |
|          |    |    |    | P | A | A |   |
| 11.83033 |    |    | ** |   |   |   | P |
| 4.468908 |    |    | *  |   |   | A | P |
| 1.842747 | ** |    |    | P | P | P | P |
| 3.626986 |    |    | *  |   | A | P | P |
|          |    |    |    | A | P | A |   |
| 0.940197 |    |    |    | P | P | A | P |
| 0.669331 |    |    |    | P | P | P | P |
| 0.332744 |    |    |    | P | P | M | A |
| 1.776761 |    | *  |    | P | P | P | P |
| 6.14471  |    | *  | *  | P | P | P | P |
| 1.756459 |    | *  |    | P | P | P | P |
|          |    |    |    |   |   | A |   |
| 0.464758 |    |    |    | P | P | P | P |

|          |    |   |    |    |   |   |   |   |
|----------|----|---|----|----|---|---|---|---|
| 29.64944 |    |   |    | ** | A |   |   | P |
| 3.330715 |    |   |    | *  | P | P | P | P |
| 1.703423 |    |   |    |    | P | P | P | P |
| 0.926969 |    |   | ** |    | P | P | P | P |
| 0.847515 |    |   |    |    | A | P | A | A |
| 0.331812 |    |   |    |    | P | P | P | P |
| 2.788418 |    |   | ** | *  | P | P | P | P |
| 0.455249 |    |   |    |    | P | P | P | P |
| 1.265638 |    |   |    |    | P | P | P | P |
| 2.588895 |    |   | *  | *  | P | P | P | P |
| 1.581129 |    |   | *  |    | P | P | P | P |
| 0.481856 |    |   |    |    | P | P | P | A |
|          |    |   |    |    | A |   |   |   |
| 5.263544 | *  | * | ** | *  | P | M | P | P |
| 0.818716 |    | * |    |    | P | P | P | A |
| 2.388091 |    |   |    | *  | M |   |   | M |
| 0.080366 | *  |   |    |    | P |   |   | A |
| 3.973397 |    |   | *  | *  | P | P | P | P |
| 5.525441 | *  |   | ** | *  | P | P | P | P |
| 0.667884 |    |   |    |    | P | P | P | P |
| 0.181926 |    |   |    |    |   |   |   | A |
| 5.052963 |    |   | ** | *  | P | P | P | P |
| 0.461003 |    |   |    |    | P | P | P | P |
| 3.04166  |    |   | ** | ** |   | A | P | P |
| 3.555426 |    |   |    | *  | P | P | P | P |
| 0.963062 |    |   | *  |    | P | P | P | A |
| 1.917189 | *  |   | ** |    | P | P | P | M |
|          |    |   |    |    | A |   |   |   |
|          | *  |   |    |    | P | P | P |   |
| 1.019596 | *  |   |    |    | P | P | A | P |
|          |    |   |    |    |   | A |   |   |
|          |    |   |    |    | A | A |   |   |
| 2.628886 | ** |   | *  | *  | P | P | P | P |
| 1.197867 | *  |   |    |    | P | P | P | P |
| 12.54594 |    | * | ** | ** | P | P | P | P |
| 4.568783 | *  |   | ** | *  | P | P | P | P |
|          |    |   | *  |    |   | A | P |   |
| 0.396371 |    |   |    |    | P | P | P | A |
| 0.470749 |    |   |    |    | P | P | P | P |
| 1.56195  |    |   | *  |    | P | P | P | P |



|          |    |   |    |   |   |   |   |   |
|----------|----|---|----|---|---|---|---|---|
| 2.337025 |    |   |    | * | P | P | P | P |
| 2.357969 |    |   |    | * | P | P | P | P |
| 1.23036  | ** |   |    |   | P | P | P | P |
| 2.062307 |    |   | ** | * | P |   | P | M |
| 0.363719 |    |   |    |   | P | P | P | P |
| 1.756252 |    |   |    |   | A |   | P | P |
| 0.562277 |    |   |    |   | P | P | P | P |
| 1.274168 |    |   | *  |   | P | P | P | A |
| 0.60696  |    |   |    |   | P | P | P | P |
| 0.641827 |    |   | ** |   | A | P | P | A |
|          | *  | * |    |   | P | P | A |   |
| 0.91243  |    |   |    |   | P | P | P | P |
| 0.441261 |    |   |    |   | P | P | P | P |
| 3.990568 | ** |   | *  | * | P | P | P | P |
|          |    |   |    |   |   |   | A |   |
| 1.470691 |    |   | *  |   | P | P | P | P |
| 1.945317 | *  | * | *  |   | P | P | P | P |
| 0.411787 |    |   |    |   | P | P | P | P |
| 0.411416 |    |   |    |   | P | P | P | P |
|          |    |   | ** |   | P | M | A |   |
| 0.942167 |    |   | *  |   | P | P | P | P |
| 0.423568 |    |   |    |   | P | P | P | P |
|          |    | * |    |   | A | P | A |   |
| 0.375787 |    |   |    |   | P | P |   | A |
| 0.446678 |    |   |    |   | P | P | P | P |
| 1.131522 | ** |   |    |   | P |   |   | A |
| 0.130453 |    |   |    |   | P | P | A | A |
| 0.733232 |    |   | *  |   | P | P | P | P |
|          |    |   |    |   |   | A |   |   |
| 1.130803 |    |   |    |   |   |   | A | A |
|          |    |   |    |   | A | P | P |   |
|          |    |   |    |   | P | A |   |   |
| 0.41364  |    |   |    |   | P | P | P | P |
| 0.344712 | *  |   |    |   | P | P | P | A |
| 0.472874 |    |   |    |   | P | P | P | P |
| 1.708169 |    |   |    |   |   |   | A | A |
| 0.936904 | *  |   |    |   | P | P | P | P |
| 4.444434 |    |   |    | * | P |   | A | P |
| 1.465101 |    |   |    |   | P | P | P | P |
|          | *  |   |    |   | P | A | A |   |

|          |    |    |    |   |   |   |   |
|----------|----|----|----|---|---|---|---|
| 0.186757 |    |    |    | M | A |   | A |
| 0.540857 |    |    |    | P | P | P | P |
| 2.704736 |    |    | *  | P | P | P | P |
| 3.569117 |    |    | *  | M |   | A | M |
| 0.700317 | *  |    |    | P | A | P | A |
| 0.059553 | *  |    |    | P | P | P | A |
| 2.710744 | *  |    | *  | P | P | P | P |
|          |    | ** |    | A |   | P |   |
| 2.202329 |    |    | *  | P | P | P | P |
| 0.763233 | ** |    |    | P | P | P | P |
| 2.483648 |    | *  | *  | P | P | P | P |
| 3.211199 | ** | ** | ** | P | P | P | P |
| 2.738174 |    |    | *  | P | P | P | P |
| 1.368229 |    | *  |    | P | P | P | P |
| 1.951498 |    | *  |    | P | P | P | P |
| 2.59423  | *  | ** | *  | P | P | P | P |
|          |    |    |    | A |   | A |   |
| 3.170908 | *  | *  | ** | P | P | P | P |
| 3.607244 |    |    | *  | P | P | P | P |
|          |    |    |    |   | A |   |   |
|          |    |    |    | P | A |   |   |
| 0.424661 |    |    |    | P | P | P | P |
|          |    |    |    | P | P | A |   |
| 3.151049 |    | *  | ** | P | P | P | P |
| 0.486566 |    |    |    |   |   |   | A |
|          | *  |    |    | P | P | A |   |
| 0.370756 |    |    |    | P | P | P | P |
| 1.303236 |    |    |    | P | P | P | P |
| 0.575939 | *  |    |    | P | P | P | P |
|          |    |    |    | P | P | A |   |
| 1.56961  |    | *  |    | P | P | P | P |
| 5.362843 |    |    | *  | A | A |   | P |
| 0.512065 |    |    |    | P | P | P | P |
|          |    | ** |    |   |   | P |   |
| 2.446541 |    | ** | *  |   |   | M | P |
| 0.413417 |    |    |    | P | P | P | P |
| 0.592656 |    |    |    | P | P | P | P |
| 0.299149 |    |    |    | P | P | P | P |
| 0.911056 |    | *  |    | P | P | P | P |
| 0.803918 |    |    |    | P | P | P | P |

|          |    |    |    |    |   |   |   |   |
|----------|----|----|----|----|---|---|---|---|
|          |    | ** |    |    | P |   |   |   |
| 2.608542 |    |    | *  | *  | P | P | P | P |
|          | *  |    |    |    | M |   |   |   |
| 2.062298 |    |    |    | *  | P | P | P | P |
| 1.703079 |    |    | *  |    | P | P | P | P |
| 0.426411 |    |    |    |    | P | P | P | P |
| 0.24068  |    |    |    |    | P |   |   | A |
| 0.536072 |    |    | *  |    | P | P | P | A |
| 2.135061 |    |    |    | *  | P | P | P | P |
|          |    |    | *  |    | P | M | P |   |
| 0.339013 |    |    |    |    | P | P | P | P |
| 0.534801 |    |    |    |    | P | P | P | A |
| 1.928296 |    |    | *  |    | P | M | P | P |
| 0.354171 |    |    |    |    | P | P | P | P |
|          | *  |    |    |    | P | A |   |   |
| 0.481865 |    |    |    |    | P | P | P | P |
| 0.33747  |    |    |    |    | P | P | P | P |
| 2.992043 |    |    | ** | ** | P | P | P | P |
| 2.646375 |    |    |    | *  | P | P | P | M |
| 1.877736 |    |    | *  |    | P | P | P | P |
| 1.555311 |    |    |    |    | P | P | P | P |
| 3.187658 |    |    | *  | ** | P | P | P | P |
| 3.439574 |    |    | *  | *  | P | P | P | P |
| 1.943977 |    |    | *  |    | P | P | P | P |
| 0.544777 |    |    |    |    | P | P | P | P |
| 0.555635 |    |    |    |    | P | P | P | P |
| 2.236188 |    |    |    | *  | P | P | P | P |
| 0.30128  |    |    |    |    | P | P | P | P |
| 1.021038 |    |    |    |    | P | P | P | P |
| 6.119272 | ** |    | ** | *  | P | P | P | P |
| 0.488651 |    | *  |    |    | P | P | P | P |
| 9.214926 |    |    | *  | ** |   |   | P | M |
|          |    |    |    |    |   | P | A |   |
| 0.81068  |    | *  | *  |    | P | P | P | P |
| 1.495616 |    |    | ** |    | P | P | P | P |
| 1.707781 |    |    | *  |    | P | P | P | P |
| 2.307863 |    |    | *  | *  | P | P | P | P |
| 0.388727 |    |    |    |    | P | P | P | P |
|          |    |    | ** |    |   |   | M |   |
| 0.383457 |    |    |    |    | P | P | P | P |

|          |    |    |    |   |   |   |   |
|----------|----|----|----|---|---|---|---|
| 0.729584 |    | *  |    | P | P | P | P |
| 0.527227 |    | *  |    | P | P | P | P |
| 0.445251 |    | *  |    | P | P | P | P |
| 0.635419 | ** |    |    | P | P | P | A |
| 4.037049 |    | *  | *  | P | P | P | P |
|          |    |    |    |   |   | A |   |
| 0.451867 |    |    |    | P | P | M | A |
| 0.402571 |    |    |    | P | P | P | P |
| 0.493338 |    |    |    | P | P | P | P |
| 1.040458 |    |    |    | P | P | P | P |
|          |    |    |    | P | A | A |   |
| 4.180674 |    | ** | *  | P | P | P | P |
| 5.145768 | ** |    | *  | M | P | P | P |
| 2.700542 |    |    | *  | P | P |   | P |
| 0.575499 |    |    |    | P | P | P | A |
| 2.883434 |    | ** | ** | P | P | P | P |
| 1.591609 |    | *  |    | P | P | P | P |
|          |    |    |    | A | P | A |   |
|          |    |    |    | M | M | A |   |
| 0.665371 |    |    |    | P | P | P | A |
| 0.697693 |    | *  |    |   |   | M | A |
|          |    |    |    | P | P | A |   |
| 0.52761  |    |    |    | P | P | P | P |
| 1.063102 |    |    |    | M | P |   | A |
| 0.948728 |    |    |    | P | P | A | P |
| 2.056225 |    |    | *  | P | P | P | P |
| 0.369342 |    |    |    | P | P | P | P |
| 0.557726 |    |    |    | P | P | A | P |
| 0.817928 |    |    |    | P | P | P | P |
| 1.430604 |    |    |    | P | P | P | P |
| 1.300942 |    |    |    | P | P | A | P |
| 0.488072 |    |    |    | P | P | P | P |
| 2.229116 |    |    | *  | P | P | P | P |
| 5.468465 | *  | ** | *  | M | P | P | P |
| 2.55842  |    | ** | *  | P | P | P | P |
| 0.432936 |    |    |    | P | P | P | P |
| 0.771043 |    |    |    | P | P | P | P |
|          |    |    |    |   | P | A |   |
| 0.805613 |    |    |    | P | A | P | P |
|          |    | ** |    |   |   | P |   |

|          |    |    |    |   |   |   |   |
|----------|----|----|----|---|---|---|---|
| 2.450673 |    |    | *  | P | P | P | P |
| 0.760602 |    |    |    | P | P | A | A |
| 1.61096  |    | *  |    | P | P | P | P |
|          | *  |    |    | P | P | P |   |
| 0.348413 |    |    |    |   |   |   | A |
| 1.028005 |    | ** |    | P | P | P | P |
| 2.4123   |    | *  | *  | P | P | P | P |
| 2.051069 |    | ** | *  | P | P | P | P |
| 2.49047  |    | *  | *  | P | P | P | P |
| 2.861678 |    |    | ** | P | P | P | P |
|          |    |    |    |   | P | A |   |
| 0.61636  |    |    |    | P | P | A | A |
|          |    | *  |    | P | P | P |   |
| 4.47146  | *  | ** | *  | P | P | P | P |
| 0.53789  |    |    |    | P | P | P | P |
| 1.420942 | *  | ** |    | P | P | P | P |
| 0.488088 |    |    |    | P | P | P | P |
| 2.007202 | ** | ** | *  | P | P | P | P |
|          |    | *  |    |   | P |   |   |
| 1.174687 |    |    |    | P | P | P | A |
| 1.215002 |    | *  |    | P | P | P | P |
| 1.143052 |    | ** |    | P | P | P | P |
|          | *  |    |    | P | A | A |   |
| 0.475539 |    |    |    | P | P | P | P |
|          |    |    |    |   | A | A |   |
| 4.03261  |    | ** | *  | P | P | P | P |
|          | *  |    |    | P | P | P |   |
|          |    |    |    | P | A | A |   |
|          |    |    |    | A |   | A |   |
| 0.376696 |    |    |    | P | P | P | P |
| 0.617157 |    | *  |    |   | P |   | A |
| 2.074777 |    | ** | *  | P | P | P | P |
| 0.231585 |    |    |    | P | P | P | P |
|          |    |    |    | P | P | A |   |
|          | *  |    |    | P | P | M |   |
|          |    |    |    | P | A |   |   |
| 2.859824 |    |    | ** | P | P | P | P |
|          |    |    |    |   | A |   |   |
|          |    |    |    | P | P | A |   |
| 0.41786  |    |    |    | P | P | P | A |

|          |   |    |    |   |   |   |   |
|----------|---|----|----|---|---|---|---|
| 1.361917 | * |    |    | P | P | P | P |
| 1.677858 | * |    |    | P | P | P | P |
| 2.672002 |   | *  | *  | P | P | P | P |
|          |   |    |    | M | P | A |   |
|          |   | *  |    |   | P | A |   |
|          |   |    |    | P | A | A |   |
| 2.891528 |   |    | ** | P | P | P | P |
| 0.443341 |   |    |    | P | P | P | P |
| 0.411544 |   |    |    | P | P | P | A |
| 4.563928 |   | *  | *  | P | P | P | P |
| 0.919973 |   | *  |    | P | P | P | P |
| 0.42479  |   |    |    | P | P | P | P |
| 0.575381 |   |    |    | P | P | P | P |
| 3.488557 |   | *  | *  | P |   | P | M |
| 2.190049 |   |    | *  | P | P | P | P |
|          |   |    |    | A |   |   |   |
|          |   |    |    | A |   |   |   |
| 2.301948 |   | *  | *  | P | P | P | P |
|          |   |    |    |   | A |   |   |
| 2.800246 |   |    | *  |   |   |   | P |
| 2.951613 |   |    | ** |   |   |   | M |
| 0.420413 |   |    |    | P | P | P | P |
|          |   |    |    | P |   | A |   |
| 2.777867 |   |    | *  | P | P | P | P |
|          |   | *  |    |   |   | P |   |
| 0.390954 |   |    |    | P | P | A | A |
| 4.079159 |   |    | *  | A |   |   | P |
| 2.686973 |   |    | *  | P | P | P | P |
| 0.57547  |   |    |    | P | P | P | P |
| 0.390513 |   |    |    | P | P | P | P |
|          |   |    |    |   | A |   |   |
| 0.384839 |   |    |    | A |   |   | A |
| 0.376431 |   |    |    | P | P | P | P |
| 2.892176 |   | *  | ** | P | P | P | P |
| 3.362814 |   | *  | *  | P | P | P | P |
| 1.982291 |   | *  | *  | P | P | P | P |
| 1.069392 |   |    |    | P | P | P | P |
| 2.894253 |   | *  | ** | P | P | P | P |
| 1.116514 |   |    |    | P | P | A | M |
| 1.787631 | * | ** |    | P | P | P | P |

|          |    |    |    |   |   |   |   |
|----------|----|----|----|---|---|---|---|
| 0.395101 |    |    |    | P | P | P | P |
|          |    |    |    | A |   |   |   |
| 0.362567 |    |    |    | P | P | P | P |
|          |    | *  |    |   | P | M |   |
| 0.429659 |    |    |    | P | P | P | A |
| 2.73787  |    |    | *  | P | P | P | P |
| 0.330099 |    |    |    | P | P | A | A |
| 2.67946  | *  |    | *  | P | P | P | P |
| 0.781206 |    | *  |    | P | P | P | P |
| 1.132825 | *  |    |    | P | P | P | M |
| 0.878757 |    |    |    | P | P | P | P |
|          | *  |    |    | P |   |   |   |
| 2.034246 |    | ** | *  | P | P | P | P |
| 0.457555 |    |    |    | P | P | P | P |
|          |    |    |    |   |   | A |   |
| 0.575311 |    |    |    | P | P | P | P |
| 2.776055 |    |    | *  | P | P | P | P |
| 0.462694 |    |    |    | A |   | A | A |
| 0.673884 |    |    |    | P | P | M | A |
| 1.869914 | *  |    |    | P | P | P | P |
| 0.92392  |    |    |    | A | P | A | P |
| 0.264363 |    | *  |    | P | P | A | A |
| 1.267096 |    | *  |    | P |   | P | A |
| 2.273172 |    | *  | *  | P | P | P | P |
| 1.617927 |    | ** |    | P | P | P | P |
| 0.856868 |    |    |    | P | P | A | P |
| 1.143596 |    |    |    | P | P | A | P |
| 0.93034  |    | *  |    | P | P | P | P |
| 10.08431 |    | *  | ** | P | P | P | P |
| 0.354786 |    |    |    | A |   |   | A |
|          | *  |    |    |   | M |   |   |
| 1.34432  |    |    |    | P | P | P | P |
| 0.214402 |    |    |    | P | P | P | P |
|          |    |    |    | A |   | A |   |
| 3.014707 |    | *  | ** | P | P | P | P |
| 0.582817 |    |    |    | P | P | P | A |
| 0.421979 |    |    |    | P | P | P | P |
|          | ** |    |    |   | P | A |   |
| 0.786134 |    |    |    | P | P | M | A |
| 0.250082 |    |    |    | P | P | P | P |

|          |    |    |   |   |   |   |   |
|----------|----|----|---|---|---|---|---|
| 5.196233 |    | *  | * | P | P | P | P |
|          | *  |    |   | P | P |   |   |
| 1.866489 | ** |    |   | P | P | P | P |
| 0.324003 |    |    |   | P | P | P | P |
|          | *  |    |   | A | P | A |   |
| 0.942662 |    | ** |   | P | P | A | A |
| 2.079055 |    |    | * |   |   |   | P |
| 0.426181 |    |    |   | P | P | P | P |
| 0.533881 |    |    |   | P | P | P | P |
| 0.482781 |    |    |   | P | P | P | P |
|          |    | *  |   | P | P | P |   |
| 2.101778 |    |    | * | P | P | P | P |
| 0.380104 |    |    |   | P | P | P | P |
| 1.881814 | *  | *  |   | P | P | P | P |
| 2.483475 | *  |    | * | P |   | P | P |
|          |    | *  |   | P | P | P |   |
| 1.809216 |    | ** |   | P | P | P | A |
| 0.486581 |    |    |   | P | P | P | A |
| 0.254185 |    |    |   | P | P | P | A |
| 0.460804 |    |    |   |   | A | A | P |
| 1.279183 | *  |    |   | P | P | A | P |
|          |    |    |   | A | P |   |   |
| 0.789477 | *  |    |   | P | P | M | P |
| 0.688399 |    |    |   | P | P | P | P |
| 1.403299 |    | ** |   | P | A | P | M |
| 0.482046 |    |    |   | P | P | P | M |
| 1.117984 |    | *  |   | P | P | P | P |
|          | ** |    |   | P | M |   |   |
| 0.252362 |    |    |   | P | P | P | P |
| 0.02319  |    |    |   |   |   |   | A |
| 0.67082  |    |    |   | P | P | P | P |
| 0.530198 |    |    |   | P | P | P | P |
| 2.570001 |    |    | * | P | P | P | P |
| 0.355184 |    |    |   | P | P | P | P |
| 1.623075 |    | *  |   | P |   | P | P |
| 0.397907 |    |    |   | P | P | P | P |
| 1.077786 |    | *  |   | P | A | P | A |
| 1.3948   |    | ** |   | P | P | P | P |
|          | *  |    |   |   | P |   |   |
| 0.118594 | *  |    |   | P | M |   | A |



|          |   |    |    |   |   |   |   |
|----------|---|----|----|---|---|---|---|
| 2.671406 | * |    | *  | P | P | P | A |
| 1.418581 |   |    |    | P | P | M | P |
| 1.295834 |   | *  |    | P | P | P | P |
| 2.032478 |   |    | *  | P | P | P | P |
| 2.67726  |   | *  | *  | P | P | P | P |
| 0.412454 |   |    |    | P | P | P | A |
| 4.014972 |   |    | *  | P | P | P | P |
| 0.794712 | * | *  |    | P | P | P | M |
| 2.422697 |   |    | *  | P | P | P | P |
| 0.373655 |   |    |    | P | P | P | P |
|          |   |    |    |   | A |   |   |
| 2.030175 |   | ** | *  | P | P | P | P |
| 0.483968 |   |    |    | P | P | M | P |
|          |   | *  |    | P | P | A |   |
| 0.37537  |   |    |    |   |   |   | A |
| 2.170109 |   |    | *  | P | P | P | P |
| 0.45299  |   |    |    | P | P | P | P |
| 0.835137 |   |    |    | M | P | P | P |
| 0.377955 |   |    |    | P | P | P | A |
| 0.28144  |   |    |    |   |   |   | A |
|          |   | *  |    |   |   | P |   |
| 3.145878 |   |    | ** | P | P | P | P |
| 0.373356 |   |    |    | P | P | P | P |
| 0.341913 |   |    |    | P | A | A | A |
| 3.035697 | * |    | ** | P | A |   | P |
| 2.814062 |   | *  | *  | P | P | P | P |
| 2.945764 |   | *  | ** | P | P | P | M |
| 0.387237 |   |    |    | P | P | P | P |
| 1.337918 |   | *  |    | P | P | P | P |
| 1.964093 | * | *  |    | P | P | P | P |
| 1.458077 |   |    |    | P | P | P | P |
|          |   | *  |    |   | P |   |   |
| 0.256539 |   | *  |    | P | P | P | P |
| 0.435497 |   |    |    | P | P | P | P |
| 0.440733 |   |    |    | P | P | P | P |
| 0.700117 | * |    |    | P | P | P | P |
| 2.157822 |   |    | *  | P | P | P | P |
| 0.869158 |   |    |    | P | P | P | P |
|          |   | *  |    |   |   | P |   |
| 2.389529 |   |    | *  | P | P | P | P |

|          |    |    |    |    |   |   |   |   |
|----------|----|----|----|----|---|---|---|---|
| 0.276936 |    |    |    |    | P | P | P | P |
| 1.605143 | *  |    | *  |    | P | P | P | P |
| 3.234741 |    |    | *  | ** | P | P | P | P |
| 3.726866 |    |    |    | *  | P |   | P | P |
| 1.663905 |    |    | *  |    | P | P | P | P |
| 2.206727 | *  |    | ** | *  | P | P | P | P |
| 0.435608 |    |    |    |    | P | P | P | P |
| 0.395681 |    |    |    |    | P | P | A | A |
| 0.344831 |    |    |    |    | P | P | P | P |
|          |    | *  |    |    | A | P | P |   |
| 1.288476 |    |    | ** |    | P | P | P | P |
| 1.63396  |    |    | *  |    | P | P | P | P |
| 0.943196 |    |    |    |    | P | P | P | P |
| 0.351399 |    |    |    |    | P | P | P | A |
| 2.128109 |    |    |    | *  | P | P | P | P |
| 1.213335 |    |    |    |    | P | P | P | P |
| 2.808228 |    |    | ** | *  | P | P | P | P |
| 2.619898 |    | *  |    | *  | P | P | P | P |
| 1.713519 | *  |    | *  |    | P | P | P | P |
| 0.418498 |    |    |    |    |   |   | A | A |
| 0.350169 |    |    |    |    | P | P | P | P |
| 4.355629 |    |    | *  | *  | P | P | P | P |
| 2.915132 |    |    |    | ** | P | P | P | P |
| 2.908219 |    |    |    | ** |   |   |   | P |
| 16.00428 |    | *  |    | ** |   | M |   | P |
| 2.544542 |    |    |    | *  |   |   |   | M |
| 3.142255 |    |    | ** | ** | P | P | P | P |
| 0.666579 |    | *  |    |    | P | P | P | P |
| 2.155299 |    |    | *  | *  | P | P | P | P |
| 1.262812 |    |    | *  |    | M |   | P | P |
| 18.09788 | ** | ** | ** | ** | P | P | P | P |
| 3.04927  |    |    | *  | ** | P | P | P | P |
| 2.166051 |    |    |    | *  |   |   |   | P |
|          |    |    |    |    |   | A |   |   |
| 0.668725 |    |    |    |    | P | P | P | P |
| 0.330132 |    |    |    |    | P | P | P | A |
| 3.72686  |    | *  |    | *  | P | P | P | P |
| 2.170337 |    |    | ** | *  | P | P | P | P |
|          | *  |    |    |    | P |   | A |   |
|          |    |    |    |    |   | A | A |   |

|          |    |    |    |   |   |   |   |
|----------|----|----|----|---|---|---|---|
| 2.196422 |    |    | *  | P | P | P | P |
| 1.583465 |    |    |    | P | P | P | P |
| 2.395252 |    |    | *  | P | P | P | P |
|          |    | *  |    |   | A | P |   |
| 1.058236 |    | *  |    | P | P | P | P |
|          | *  |    |    | M | P | P |   |
|          | ** |    |    | P |   |   |   |
| 2.173446 | *  | *  | *  | P | P | P | P |
| 0.230957 | *  |    |    | P | P | P | P |
| 2.588975 |    |    | *  | P | P | P | P |
| 0.970791 |    |    |    | P | P | P | P |
|          |    |    |    |   |   | A |   |
| 0.34107  |    |    |    |   |   |   | A |
| 4.321949 |    | *  | *  | P | P | P | P |
| 0.276359 |    |    |    | P | P | P | P |
| 3.932272 |    |    | *  | P | P | P | P |
| 1.139435 |    | *  |    | A | M | P | P |
| 2.317005 |    | *  | *  | P | P | P | P |
| 0.4334   |    |    |    | P | P | P | P |
| 2.195574 |    |    | *  |   | A | A | P |
| 0.779004 |    |    |    | P | P | P | P |
| 0.469315 |    |    |    | P | P | P | P |
| 2.007085 |    | *  | *  | P | P | P | P |
| 2.422705 |    |    | *  | P | P | P | P |
| 1.909753 |    | *  |    | A | P | A | M |
| 2.320977 |    | ** | *  | P | P | P | P |
|          |    |    |    | A | P | P |   |
| 3.905628 |    | ** | *  | P | P | P | P |
| 0.38429  |    |    |    | P | P | P | P |
| 0.455299 |    |    |    | P | P | P | P |
| 3.702616 |    | ** | *  | P | P | P | P |
| 46.1159  |    |    | ** | P |   | P | P |
| 1.468912 | *  | ** |    | P | P | P | A |
| 1.086983 | *  |    |    | P | P | P | P |
| 5.82485  | ** | ** | *  | P | P | P | P |
| 0.809644 | ** | *  |    | M | P | P | A |
| 0.431833 |    |    |    | P | P | P | P |
| 1.341213 |    | *  |    | P | P | P | P |
| 1.433817 |    | *  |    | P | P | P | P |
| 0.667999 | *  |    |    | P | P | P | P |

|          |    |    |    |   |   |   |   |
|----------|----|----|----|---|---|---|---|
|          |    |    |    | P | P | P |   |
| 1.717112 |    | *  |    | P | P | P | P |
| 0.456112 |    |    |    | P | P | P | P |
|          |    |    |    | P | P | P |   |
| 0.615632 | *  |    |    |   | P |   | A |
| 3.345505 |    |    | *  | P | P | P | P |
|          |    | *  |    | A |   | P |   |
|          |    | ** |    |   |   | P |   |
| 1.095862 |    | *  |    | P | P | P | P |
| 2.815059 |    |    | *  | P | A | P | P |
| 9.062939 |    | *  | ** | P | P | P | P |
| 2.438579 |    |    | *  | P | P | P | P |
|          |    | *  |    | P | M | P |   |
|          | ** |    |    |   | P |   |   |
| 3.458705 |    | ** | *  | P | P | P | P |
| 2.294895 |    |    | *  | P | P | P | P |
| 0.453086 |    |    |    | P | P | P | A |
| 0.418956 | ** |    |    |   | P |   | A |
| 3.491592 |    |    | *  | P | P | P | P |
| 1.491374 |    |    |    | P | P | P | P |
| 0.677936 |    |    |    | P | P | P | P |
| 1.672078 |    | *  |    | P | P | P | P |
|          |    |    |    | A | A |   |   |
|          |    |    |    | A | A |   |   |
|          |    |    |    | P | A | A |   |
|          |    |    |    | A | P |   |   |
| 172.5193 |    |    | ** |   |   |   | P |
|          |    | *  |    | P | P | M |   |
| 57.44754 | *  | ** | ** | P | P | P | P |
| 0.806423 |    |    |    | P | P | P | P |
| 0.972944 |    |    |    | P | P | P | P |
|          |    |    |    |   | A | A |   |
| 3.273672 |    | *  | *  | P | P | P | P |
| 2.193341 |    |    | *  |   |   | A | M |
| 2.948792 |    | *  | ** | P | P | P | P |
|          | *  |    |    |   | M |   |   |
| 3.806371 |    | *  | *  | P | A | P | A |
| 2.208938 |    |    | *  |   |   | A | M |
|          |    |    |    | P | P | P |   |
|          | *  |    |    | P | P |   |   |

|          |    |    |   |   |   |   |
|----------|----|----|---|---|---|---|
|          |    |    |   |   | A |   |
| 2.337708 |    | *  | A | A |   | P |
| 7.07827  |    | ** |   |   |   | P |
| 1.726397 |    |    | P | P | P | P |
| 4.526751 |    | *  | P | A |   | P |
| 0.061064 |    |    |   |   |   | A |
| 2.241016 |    | *  | P | P | P | A |
| 1.062575 |    |    | P | P | P | P |
| 1.312123 |    | *  | P | P | P | P |
| 0.386673 |    |    | P | P | P | P |
| 2.007806 |    | *  | P | P | P | P |
| 0.318482 |    | ** | A |   | P | A |
|          |    | ** |   |   | P |   |
| 0.312572 |    |    | P | P | P | P |
| 0.491079 |    |    | P | P | P | P |
| 23.9071  |    | ** | A | P | M | P |
| 1.571908 |    | *  | P | P | P | P |
| 2.775795 |    | *  | P | M | A | P |
|          |    | *  |   |   | P |   |
| 0.437667 |    |    | P | P | P | P |
| 1.420433 | ** |    | P | P | P | P |
|          |    |    |   |   | A |   |
| 0.123186 |    |    | P | P | A | A |
| 4.343555 | *  | *  | P |   |   | P |
| 0.684254 |    | *  | P | P | P | A |
|          |    | *  | P |   | P |   |
|          | ** |    | P |   |   |   |
| 2.525125 |    | *  |   | P |   | M |
|          |    |    | P | M | A |   |
| 0.942958 | *  |    | P | P | P | P |
| 3.105136 |    | ** | P | A | P | M |
| 5.817652 |    | *  | M |   |   | M |
| 2.449562 |    | *  |   |   |   | P |
| 3.103258 |    | ** | P | P | P | P |
| 1.754588 |    | *  | P | P | P | P |
| 0.476657 | *  |    | P | P | P | P |
|          |    | ** | P |   | P |   |
|          |    | *  |   | A | M |   |
|          | ** |    |   | P |   |   |
| 0.593211 |    |    | P | A | P | A |

|          |    |    |    |   |   |   |   |
|----------|----|----|----|---|---|---|---|
| 0.870513 | ** |    |    | P |   | P | A |
| 0.492577 |    |    |    |   | P |   | A |
| 0.521867 |    |    |    | P | P | P | P |
| 0.527912 |    |    |    | P | A | A | A |
| 0.551441 |    |    |    | P | P | P | P |
|          |    | ** |    |   | P |   |   |
| 2.289407 |    |    | *  | A |   |   | P |
| 0.396743 |    |    |    | P | P | P | P |
| 2.15825  |    |    | *  | P | P | P | P |
| 0.484323 |    |    |    | P | P | P | P |
| 0.757639 | *  |    |    | P | P | P | P |
| 2.358958 | *  |    | *  | P |   |   | P |
| 1.831352 | ** | *  |    | P | P | P | P |
|          | ** |    |    | P | A |   |   |
| 2.399662 | ** | ** | *  | P | P | P | P |
| 0.660238 |    |    |    | A | A |   | A |
| 2.134622 |    |    | *  | P | P | P | P |
| 1.593397 | *  |    |    | P | P | P | P |
| 0.456124 |    |    |    | P | P | P | P |
| 1.292518 | *  |    |    | P | P | A | P |
| 0.131307 |    |    |    |   |   |   | A |
| 1.521337 |    | ** |    | P | P | P | P |
| 2.068466 |    | ** | ** | P | P | P | P |
| 1.600565 |    |    |    | A |   |   | A |
| 5.619389 |    | ** | *  |   |   | P | P |
|          |    |    |    | A | A | P |   |
| 0.848887 |    |    |    | P | P | P | P |
| 0.319592 |    |    |    | P | P | P | P |
|          | *  |    |    | P |   |   |   |
| 2.807084 |    | ** | *  | P | P | P | P |
| 3.224787 |    | ** | ** | P | P | P | P |
|          |    |    |    |   | P | A |   |
| 3.514319 |    |    | *  |   | A |   | P |
| 0.807328 | *  |    |    | P | P | P | P |
| 0.060881 |    |    |    | P | P | A | A |
| 1.754745 |    | ** |    | P | P | P | P |
| 3.302764 |    |    | *  |   | A |   | P |
| 0.076664 |    |    |    |   |   |   | A |
|          | *  | *  |    | P | P |   |   |
|          |    |    |    | A |   |   |   |

|          |    |    |    |    |   |   |   |   |
|----------|----|----|----|----|---|---|---|---|
|          |    | ** |    |    |   | M |   |   |
|          | *  |    |    |    | P |   | A |   |
|          |    | ** |    |    |   | P |   |   |
|          |    |    |    |    |   | A |   |   |
| 2.156087 |    |    |    | *  |   |   |   | P |
|          |    |    |    |    | A |   | P |   |
| 0.393378 |    |    |    |    | P | P | P | P |
|          |    |    | *  |    |   |   | P |   |
| 2.099755 |    |    | *  | *  | P | A | P | P |
|          |    | ** |    |    |   | P |   |   |
| 0.826988 | *  |    |    |    | P | P | A | P |
| 0.630336 |    |    |    |    | P | P | P | A |
| 0.088219 |    |    |    |    | P | P | P | A |
| 0.349954 |    |    |    |    | P | P | P | P |
| 0.786288 |    |    | *  |    | P | M | P | P |
| 2.657088 |    |    |    | *  | P | P | P | P |
| 2.363207 |    |    |    | *  |   |   |   | P |
| 3.534181 |    |    |    | *  | P | P | A | P |
| 1.227178 | *  |    |    |    | P | P | P | P |
| 0.940126 |    |    |    |    | P | P | A | A |
|          |    | *  |    |    |   | P |   |   |
| 1.156602 |    |    | *  |    | P | P | P | P |
| 0.077845 |    |    |    |    |   |   | A | A |
| 0.217426 |    |    |    |    | P | P | P | A |
|          |    |    |    |    | P |   | A |   |
| 8.769746 | *  | *  | ** | ** | P | P | P | P |
|          |    |    |    |    | A |   |   |   |
|          |    | ** |    |    | A | M |   |   |
| 0.390867 |    |    |    |    | P | P | P | A |
| 0.784446 | *  |    |    |    | P | P | P | A |
| 1.769833 |    |    | *  |    | P | P | P | P |
| 2.857103 |    |    |    | ** | P | P | P | P |
|          |    |    |    |    |   | A | A |   |
|          |    |    |    |    | P | A | A |   |
|          |    | *  |    |    |   | P | P |   |
| 3.092144 |    |    |    | ** | P | P | P | P |
|          |    |    | ** |    |   |   | M |   |
| 1.224964 |    |    |    |    | P | P | P | P |
|          |    |    |    |    | A |   |   |   |
|          | ** |    |    |    | M | A |   |   |

|          |    |   |    |   |   |   |   |
|----------|----|---|----|---|---|---|---|
| 0.042915 |    |   |    |   |   |   | A |
| 0.209215 |    |   |    | P | P | P | A |
| 1.108132 |    |   | *  | P | P | P | P |
| 1.238569 |    | * | *  | P | P | P | P |
| 0.448177 |    |   |    | P | P | A | P |
| 2.933508 |    |   |    |   |   |   | P |
|          | ** |   |    | P | P | A |   |
| 0.175291 |    |   |    |   | A |   | A |
| 0.551138 |    |   |    | P | P | P | P |
| 0.331704 |    |   |    | P | P | P | P |
| 0.560541 |    |   |    | A | P | A | A |
| 0.498176 |    |   |    | P | P | P | P |
| 0.849798 |    |   |    | P | P | A | A |
| 0.460769 |    |   |    |   | P |   | A |
|          | *  |   |    | P | A |   |   |
| 0.327072 |    |   |    | P | P | P | P |
| 0.54258  |    |   |    | P | P | P | P |
| 0.072593 |    |   |    | P | P | P | A |
|          |    |   |    | A |   |   |   |
|          |    |   | ** |   | P | P |   |
| 0.40887  |    |   |    | P | P | P | P |
| 2.655364 |    |   | *  | P | P | P | P |
| 0.480247 |    |   |    | P | P | P | P |
| 1.034225 | *  |   |    | P | P | P | P |
| 0.42844  |    |   |    | P | P | P | A |
| 2.090082 |    |   |    | * | M | P | P |
| 0.790347 |    | * |    | P | P | M | M |
|          |    |   |    |   |   | A |   |
| 0.810065 | ** |   |    | P | P |   | A |
|          | *  |   |    | P | A | A |   |
| 0.295146 |    |   |    | P | P | P | P |
| 0.761846 |    |   |    | P | P | P | P |
| 0.461811 |    |   |    | P | P | P | P |
| 4.874891 |    |   |    | * | P | P | P |
| 1.162017 |    | * |    | P | P | P | P |
| 0.091405 |    |   |    | A |   | A | A |
|          |    |   |    | A | P | P |   |
| 1.931361 |    |   |    | P | P | P | P |
| 2.1969   |    |   |    | * | P | P | P |
|          |    | * |    |   |   | P |   |



|          |    |   |    |    |   |   |   |   |
|----------|----|---|----|----|---|---|---|---|
| 5.606949 |    |   | *  | *  | P | P | P | P |
| 0.373943 |    |   |    |    | P | P | P | P |
| 0.262904 |    |   |    |    | P | P | P | A |
| 0.341069 |    |   |    |    | P | P | P | P |
| 0.455476 |    |   |    |    | P | P | P | P |
| 2.396058 |    |   | *  | *  | P | P | P | P |
| 0.25561  |    |   |    |    | M |   |   | A |
| 2.87445  |    |   | *  | ** | P | P | P | P |
| 0.362082 |    |   |    |    | P | P | P | P |
| 1.269088 |    |   | *  |    | P | P | P | P |
|          | ** |   |    |    | P |   |   |   |
| 17.1713  |    |   |    | ** |   |   |   | M |
| 0.922728 |    |   | ** |    | A | P | P | A |
| 4.072673 |    |   | ** | *  | P | P | P | P |
| 0.328486 |    |   |    |    | P | P | P | P |
|          |    |   |    |    | P | P | A |   |
|          |    |   | *  |    |   | A | P |   |
| 2.730984 |    |   | *  | *  | P | P | P | P |
| 0.469461 |    |   |    |    | P | P | P | A |
|          |    |   |    |    |   | A |   |   |
| 3.20146  |    |   | *  | ** | P | P | P | P |
| 1.591543 |    |   | *  |    | P | P | P | P |
|          |    |   | ** |    |   |   | P |   |
|          | *  |   |    |    | P |   | P |   |
| 0.48102  |    |   |    |    | P | P | P | P |
| 0.499515 |    |   |    |    | P | P | P | P |
| 0.448983 |    |   |    |    | P | P | P | M |
| 0.310256 |    |   |    |    | P | P | P | P |
| 0.472904 |    |   |    |    | P | P | A | A |
| 0.872888 | *  |   |    |    | P | P | P | P |
| 0.740392 | *  |   |    |    | P | P | P | P |
| 0.850288 |    |   |    |    | P | P | P | P |
| 0.226415 |    |   |    |    | P | P | P | A |
| 2.611939 |    |   |    | *  | P | P | P | P |
|          |    |   |    |    | A | A | P |   |
| 10.03388 | ** | * | ** | ** | P | P | P | P |
|          |    |   |    |    |   |   | A |   |
| 1.167542 |    |   |    |    | P | P | P | P |
|          | ** |   |    |    | A |   | A |   |
| 1.168258 | *  | * | *  |    | P | P | P | P |

|          |    |   |    |    |   |   |   |   |
|----------|----|---|----|----|---|---|---|---|
| 0.267603 |    |   |    |    | P | P | P | A |
| 1.537304 |    |   |    |    | A | A | A | A |
| 0.373876 |    |   |    |    | P | P | P | P |
| 0.473422 |    |   |    |    | P | P | P | P |
|          |    |   |    |    |   |   | A |   |
| 1.552633 | ** | * |    |    | P | P | P | A |
| 0.305097 |    |   |    |    | P | P | P | A |
|          |    |   |    |    |   | A |   |   |
| 3.100627 |    |   | ** | ** | P | P | P | P |
| 2.042731 |    |   | *  | *  | P | P | P | P |
| 2.788068 |    |   | ** | *  | P | P | P | P |
| 2.708902 |    |   | *  | *  | M | P | P | P |
| 0.307226 |    |   |    |    | P | P | A | A |
| 0.553567 |    |   |    |    | P | P | P | P |
| 0.35499  |    |   |    |    | P | P | P | P |
| 2.895102 |    |   |    | ** | M | A | A | P |
| 0.717254 |    |   |    |    | P | P | P | A |
| 1.974954 | *  |   | ** |    | P | P | P | P |
| 0.54508  |    |   |    |    | P | P | P | P |
| 0.08074  |    |   |    |    | P | P | A | A |
| 1.326225 |    | * |    |    | P | P | P | A |
| 0.42155  |    |   |    |    | P | P | P | A |
| 0.152776 |    |   |    |    |   |   | A | A |
| 1.747526 |    |   | ** |    | P | P | P | P |
| 2.373026 | *  |   |    | *  | P | P | P | P |
| 1.563483 |    |   |    |    | P | P | P | P |
| 0.699394 | *  |   |    |    | P | P | A | P |
| 0.42514  |    |   |    |    | P | P | P | P |
| 1.69553  | *  |   |    |    | P | P | P | P |
| 2.243094 | *  |   | *  | *  | P | P | P | P |
| 0.839668 |    |   |    |    | P | P | M | P |
| 1.356015 |    |   | *  |    | P | P | P | P |
| 1.43881  |    |   |    |    | A | M | A | A |
| 0.490337 |    |   |    |    | P | P | P | P |
| 0.083768 |    |   |    |    | A | P | A | A |
| 0.35882  |    |   |    |    | P | P | P | P |
| 0.491417 |    |   |    |    |   |   |   | A |
| 0.47914  |    |   |    |    | P | P | P | P |
| 0.534141 |    |   |    |    | P | P | A | A |
| 2.642947 |    |   | *  |    | P | A |   | P |

|          |    |    |    |   |   |   |   |
|----------|----|----|----|---|---|---|---|
| 0.845725 |    |    |    |   | P | P | P |
| 3.293125 |    | *  | *  | P | P | P | P |
| 0.409963 |    |    |    | P | P | P | P |
| 0.38396  |    |    |    | P | P | P | P |
|          |    | ** |    |   | P | A |   |
| 0.718504 |    |    |    | P | P | P | P |
|          |    |    |    |   | A |   |   |
|          |    | ** |    | P | P | P |   |
| 0.596644 | *  |    |    | P | P | P | P |
|          |    |    |    |   | P | P |   |
| 1.072021 | *  |    |    | P | P | P | P |
| 2.006881 |    |    | *  | P | P | P | M |
| 0.557709 | ** |    |    | M |   |   | A |
| 2.443927 |    |    | *  | P | A | P | P |
| 2.599923 |    |    | *  | P | P | P | A |
| 3.788439 | *  | ** | *  | P | P | P | P |
|          |    | *  |    |   | M | M |   |
| 1.186553 |    | *  |    | P | P | P | P |
|          |    | *  |    |   | P | A |   |
| 1.052771 |    |    |    | P | P | P | A |
| 5.767048 |    |    | *  |   | P |   | P |
| 2.125763 |    | *  | *  | P | M | P | P |
| 0.456539 |    |    |    | P | P | P | P |
| 0.573923 |    |    |    | P | P | A | A |
| 0.895849 |    |    |    | P | P | P | P |
| 1.95339  |    | ** |    | P | P | P | P |
|          |    | *  |    |   | P |   |   |
| 0.257241 |    |    |    | P | P | P | P |
| 0.430597 |    |    |    | P | P | P | A |
|          |    | ** |    |   | P |   |   |
| 0.925222 | *  |    |    | P | P | P | P |
|          |    |    |    |   | A |   |   |
| 0.427208 |    |    |    | P | P | P | P |
|          |    |    |    | P | A | A |   |
| 0.484803 |    |    |    | P | P | P | P |
| 3.812653 |    | ** | *  | P | P | P | P |
| 16.30692 |    |    | ** |   |   |   | P |
|          |    |    |    | P | A | P |   |
| 0.094035 |    |    |    | P | P | P | A |
| 2.595641 |    | *  | *  | A | A | P | P |

|          |    |    |    |    |   |   |   |   |
|----------|----|----|----|----|---|---|---|---|
| 0.72099  |    |    |    |    | P | P | P | P |
|          |    |    | *  |    |   |   | P |   |
| 5.006808 |    |    | *  | *  | P | P | P | P |
| 1.931649 |    |    | *  |    |   |   | P | A |
| 1.413773 |    |    | *  |    | P | P | P | P |
| 2.770263 |    |    | ** | *  | P | P | P | P |
| 4.023804 | ** |    | ** | *  | P | P | P | P |
| 0.503583 | *  |    |    |    | P | P | P | A |
| 2.126088 |    |    |    | *  |   | A | A | A |
| 4.924984 |    |    | ** | *  | P | P | P | P |
| 2.04925  |    |    |    | *  |   |   | P | P |
| 1.409673 | ** |    |    |    | P | P | P | P |
| 0.372063 |    |    |    |    | P | P | P | P |
| 1.567477 | *  |    | ** |    | P | P | P | P |
| 0.415254 |    |    |    |    | P | P | P | P |
| 0.26146  |    |    |    |    | P | P | P | P |
|          |    |    |    |    |   |   | A |   |
| 0.240939 |    |    |    |    |   | A |   | A |
| 1.175393 | *  |    |    |    | P | P | P | P |
|          | ** |    |    |    | P | A |   |   |
| 0.910451 | *  |    |    |    | P | P | P | P |
| 3.912301 |    | *  | *  | *  | P | P | P | P |
| 2.020697 |    |    | ** | *  | P | P | P | P |
| 5.383709 |    |    | ** | *  | P | A | P | P |
| 3.414844 |    |    | *  | *  | P | P | P | P |
| 9.83859  |    |    | ** | ** |   |   | P | P |
| 2.470185 |    |    |    | *  | P | P | P | P |
| 0.426294 |    |    |    |    | P | P | P | P |
|          |    |    | *  |    | P | A | P |   |
| 2.176459 | ** | ** | *  | *  | P | M | P | P |
| 16.52779 |    |    |    | ** |   | A | A | P |
|          |    |    | ** |    |   |   | M |   |
|          |    | *  |    |    |   | M | A |   |
|          |    |    | *  |    | P | P | P |   |
| 3.972575 | *  |    |    | *  | P |   |   | P |
| 0.201154 |    |    |    |    | P | P | P | P |
| 0.327915 |    |    |    |    | P | P | P | P |
| 21.05945 |    |    |    | ** |   |   |   | P |
| 2.004576 |    |    |    | *  | A | P |   | P |
|          | *  |    |    |    | P | P | P |   |

|          |    |    |    |   |   |   |   |
|----------|----|----|----|---|---|---|---|
| 3.618634 |    |    | *  | A |   | A | P |
|          |    |    |    | A |   |   |   |
| 1.702111 | ** | *  |    | P | P | P | P |
| 0.542472 | ** |    |    | P | P | P | P |
| 0.481548 |    |    |    | P | P | P | P |
| 2.050621 |    |    | *  | P | P | A | P |
|          |    | ** |    | P |   | P |   |
| 0.468341 |    |    |    | P | P | P | P |
| 1.962223 |    |    |    | P | M | P | A |
|          |    |    |    | P | P | A |   |
| 0.421601 |    |    |    | P | P | A | P |
| 0.235956 |    |    |    | P | P | P | P |
|          |    |    |    | P |   |   |   |
| 10.16767 |    |    | ** |   |   |   | P |
| 0.244803 |    |    |    | P | P | P | P |
| 0.258094 |    |    |    | P | P | P | P |
| 0.068121 |    |    |    |   |   |   | A |
|          |    |    |    | P | P | A |   |
| 0.489037 |    |    |    | P | P | A | A |
| 2.524536 |    | *  | *  | P | P | P | P |
| 0.719841 |    |    |    | P | P | P | P |
| 4.174588 |    |    | *  |   | A |   | P |
| 0.985725 |    |    |    | P | P | P | P |
| 0.475764 |    |    |    | P | P | P | P |
| 0.288233 |    |    |    | P | P | P | P |
| 0.057321 |    |    |    | A |   | P | A |
| 1.143444 |    |    |    | A | A |   | P |
| 1.819033 |    | *  |    | P | P | P | P |
|          |    |    |    | A | P | A |   |
| 0.493753 |    |    |    | P | P | P | P |
| 2.593    |    |    | *  |   | P |   | M |
|          | *  |    |    | P |   |   |   |
| 0.388832 |    |    |    | P | P | P | P |
|          |    | ** |    | P | P |   |   |
|          |    |    |    | A | A |   |   |
| 0.384384 |    |    |    | P | P | A | A |
| 0.038371 |    |    |    | P | P | A | A |
| 0.319606 | *  |    |    | P | P | A | A |
| 1.283424 |    | *  |    | P | P | P | P |
| 0.102982 |    |    |    | P | A | A | A |

|          |    |    |    |    |   |   |   |
|----------|----|----|----|----|---|---|---|
| 0.467785 |    |    |    | P  | P | A | A |
| 8.572381 | *  |    | *  | ** | P | P | P |
| 2.187166 |    |    |    | *  |   | P | A |
|          |    |    |    |    | A | P |   |
| 0.437658 |    |    |    | P  | P | P | P |
| 0.366173 |    |    |    |    |   | P | A |
| 1.771503 | *  |    |    | P  | P | P | P |
| 2.233428 |    |    |    | *  | P | P | P |
|          |    |    |    | A  | P | A |   |
| 1.508503 |    |    | *  | P  | P | P | P |
| 0.834867 |    |    |    | P  | P | P | P |
| 0.770232 | ** |    |    | P  | P | P | A |
| 3.506357 |    |    | *  | *  | P | P | P |
| 0.32662  |    |    |    | P  | P | P | P |
| 0.484402 |    |    |    | P  | P | P | P |
| 2.431302 |    |    | *  | *  | P | P | P |
| 2.366584 | *  |    |    | *  | P |   | A |
|          |    |    |    | P  | A | A |   |
| 2.524789 |    |    | *  | *  | P | P | P |
|          | *  |    | *  | P  |   | P |   |
| 0.341047 |    |    |    | P  | P | P | A |
| 1.546228 |    |    | *  | P  | M | P | P |
|          |    |    |    |    | A |   |   |
|          | *  |    |    | P  |   |   |   |
| 14.53431 |    |    | ** | ** | P | P | P |
| 1.750145 |    |    | *  |    | P | P | P |
| 1.082879 |    | *  |    |    | P | P | A |
| 2.443185 |    |    |    | *  | P | P | A |
|          | ** |    |    | M  |   | A |   |
|          |    | ** |    |    | P |   |   |
| 1.36915  |    |    |    | P  | P | P | A |
|          |    |    |    |    |   | A |   |
| 0.787719 |    |    |    | P  | P | P | P |
| 5.311891 |    |    |    | *  |   | M | P |
| 0.191823 |    |    |    |    |   |   | A |
| 0.270508 |    |    |    | P  | P | A | P |
| 0.349849 |    |    |    | P  | P | A | A |
| 2.574848 |    | *  | *  | P  | P | P | P |
| 2.782776 |    |    | *  | P  | P | P | P |
| 3.211476 |    | *  | ** | P  | P | P | P |

|          |   |    |    |   |   |   |   |
|----------|---|----|----|---|---|---|---|
| 1.289082 |   | *  |    | P | P | P | P |
| 0.449689 |   |    |    | P | P | A | A |
| 0.474927 |   |    |    | P | P | P | P |
| 2.737584 |   | ** | *  | P | P | P | P |
| 0.499891 |   |    |    | P | P | P | A |
| 4.305477 | * |    | *  | P | A | P | P |
|          |   | ** |    | P |   | P |   |
| 0.236185 |   |    |    | P | P | P | P |
| 0.304656 |   |    |    | P | P | A | A |
| 2.027922 |   |    | *  | P | P | P | P |
| 0.268694 |   |    |    | P | P | P | P |
| 5.723521 |   | ** | *  | P | P | P | P |
| 3.021203 |   | *  | ** |   |   | P | P |
| 0.022733 |   |    |    | P | P | A | A |
| 1.356736 |   | *  |    | P | P | P | P |
| 0.408238 |   |    |    | P | P | P | P |
| 0.423584 |   |    |    |   | P | A | A |
|          |   | ** |    |   |   | P |   |
| 3.217466 |   | *  | ** | P | P | P | P |
|          |   | *  |    | P | P | M |   |
| 2.31431  |   |    | *  | P | P | P | P |
| 0.471236 |   |    |    | P | P | A | A |
| 0.465796 |   |    |    | P | P | P | P |
| 0.820081 |   |    |    | P | P | P | P |
| 0.27019  | * |    |    | P | P | P | P |
| 0.395593 |   |    |    | P | P | P | P |
| 7.400183 |   | ** | ** | P | P | P | P |
|          | * |    |    | P | P | A |   |
| 1.400652 |   | *  |    | M | P | P | P |
| 0.942524 |   | *  |    | P | P | P | P |
| 0.937385 |   |    |    | P | P | A | P |
| 2.275772 |   |    | *  | P | P | P | P |
| 0.939021 |   |    |    | P | P | P | P |
| 0.600513 | * |    |    | P | P | P | P |
| 1.925607 |   |    |    | P | P | P | P |
| 3.183125 |   |    | ** | P | P | P | P |
| 1.002733 |   | *  |    | P | P | P | P |
|          | * |    |    | P | P | P |   |
| 0.467333 |   |    |    | P | P | P | P |
| 1.930597 |   | *  |    | P | P | P | P |

|          |    |    |    |    |   |   |   |   |
|----------|----|----|----|----|---|---|---|---|
| 1.61331  |    |    | *  |    | P | P | P | P |
| 3.992997 |    |    | *  | *  | P | P | P | P |
| 2.111895 |    |    | *  | *  | P | P | P | P |
| 0.336991 |    |    |    |    | P | P | P | P |
| 0.076963 |    |    |    |    |   |   |   | A |
| 0.485296 |    |    | *  |    | P | P | P | A |
| 0.428127 |    |    |    |    | P | P | P | P |
| 2.314094 |    |    |    | *  | P | A | A | P |
|          |    |    |    |    | P | P | P |   |
| 2.406054 |    |    | *  | *  | P | P | P | P |
| 3.200841 |    |    | *  | ** | P | P | P | P |
|          |    |    |    |    | A |   |   |   |
|          |    |    |    |    | P | P | A |   |
| 0.620226 |    |    |    |    | P | P | P | P |
| 20.14725 | ** | *  |    | ** | P | P | P | P |
| 1.733731 | *  |    | *  |    | P | P | P | P |
| 0.596918 |    |    |    |    | P | P | P | A |
| 2.247039 |    |    | *  | *  | P | P | P | P |
| 1.724726 |    |    | *  |    | P | P | P | P |
| 0.179202 |    |    |    |    | P | P | P | P |
| 0.36404  |    |    |    |    | P | P | P | P |
| 2.261577 |    |    |    | *  | P | P | P | P |
| 2.422862 |    |    |    | *  | P | P | P | P |
| 0.878018 | *  |    |    |    | P | P | P | P |
| 1.06112  |    |    | *  |    | P | P | P | P |
| 0.206786 | *  |    |    |    | P | A | P | A |
| 1.360595 |    |    | *  |    | P | P | P | P |
| 7.697361 | *  |    | ** | ** | P |   | P | P |
| 2.84985  |    |    |    | ** | P | P | P | P |
| 0.429578 |    |    |    |    | P | P | P | A |
|          | *  |    |    |    | P | P |   |   |
|          |    |    | *  |    |   |   | A |   |
| 27.08379 |    |    |    | ** |   |   |   | P |
|          |    | ** |    |    |   | A |   |   |
|          |    |    |    |    |   | M |   |   |
| 11.55026 | ** |    |    | ** | P |   | P | P |
| 1.433151 |    |    | *  |    | P | P | P | P |
| 0.469305 |    |    |    |    | P | P | P | P |
| 2.523872 |    |    |    | *  |   | A | A | P |
| 1.374329 |    | *  |    |    | P | P | P | M |



|          |    |   |    |    |   |   |   |   |
|----------|----|---|----|----|---|---|---|---|
| 2.872718 | *  |   |    | ** | P |   |   | P |
| 0.425383 |    |   |    |    | P | P | P | P |
| 0.311571 |    |   |    |    | P | P | P | P |
|          | ** |   |    |    | P | A |   |   |
| 0.314401 |    |   |    |    | P | P | P | P |
| 1.216526 |    |   |    |    | P | P | P | P |
| 1.561142 |    |   | ** |    | P | P | P | P |
| 0.350998 |    |   |    |    | P | P | P | P |
| 0.565552 | *  |   |    |    | P | A | A | A |
| 0.236389 |    |   |    |    | P | P | P | P |
| 5.107232 |    |   |    | *  | M | P |   | M |
| 2.325163 |    |   | ** | *  | P | P | P | P |
| 0.476646 |    |   |    |    | P | P | P | P |
| 0.421591 |    |   |    |    | P | P | P | P |
|          |    |   |    |    | A |   |   |   |
| 1.103264 | *  |   |    |    | P |   |   | A |
| 0.604546 | *  |   |    |    | P | P | P | P |
| 2.003693 |    |   |    | *  | P | P | P | M |
| 0.166468 |    |   |    |    |   |   |   | A |
|          |    |   |    |    | A |   | A |   |
| 0.941513 |    |   |    |    | P | P | A | P |
| 2.277906 |    |   |    | *  | P | P | P | P |
| 0.397324 |    |   |    |    | P | P | P | P |
| 0.489401 |    |   |    |    | P | P | P | P |
| 0.119073 |    |   |    |    | P | P | P | A |
| 1.852347 | *  |   |    |    | P | P | P | P |
| 2.581376 | *  | * | *  | *  | P | P | P | P |
| 0.462506 |    |   |    |    | P | P | P | P |
|          | ** |   |    |    | P | P | A |   |
| 0.41236  |    |   |    |    | P | P | P | P |
| 0.086552 |    |   |    |    | P | P | A | A |
| 0.28556  |    |   |    |    | P | P | P | P |
| 0.254907 |    |   |    |    | P | P | P | P |
| 17.50767 |    |   |    | ** |   |   |   | P |
| 0.487467 |    |   |    |    | P | P | P | P |
|          |    |   |    |    |   | A | A |   |
| 2.32057  |    |   | *  | *  | P | P | P | P |
| 0.600627 | ** |   |    |    | P | P | P | P |
| 2.242942 |    |   | *  | *  | P | P | P | P |
| 3.856131 |    |   |    | *  | P | P | P | P |

|          |    |   |    |    |   |   |   |
|----------|----|---|----|----|---|---|---|
| 0.29126  |    |   |    | P  | P | P | P |
| 0.359751 |    |   |    | P  | P | P | P |
| 0.243796 |    |   |    | P  | P |   | A |
| 0.035482 |    |   |    | P  | P | P | A |
|          |    |   | ** |    | A | P |   |
| 1.137914 |    |   |    | P  | A |   | A |
| 0.389445 |    |   |    | P  | P | P | P |
| 7.931007 | *  |   | *  | ** | P | M | P |
| 5.954172 |    |   | ** | *  | P | P | P |
| 2.655576 |    |   | *  | *  | P | P | P |
| 0.635792 | ** |   |    |    | P | P | P |
| 2.192365 |    | * |    | *  | A | P | A |
| 0.612849 | *  |   |    |    | P |   | A |
| 7.479081 |    |   | ** | ** |   |   | P |
| 0.441742 |    |   |    |    | P | P | P |
| 0.587187 |    |   |    |    | P | P | P |
|          |    |   |    |    | A | A |   |
|          |    |   | ** |    | P |   | P |
| 0.747247 |    |   | ** |    | P | P | P |
| 2.311405 |    |   |    | *  | P | P | P |
| 2.252729 |    |   |    | *  | P | P | P |
| 0.304053 |    |   |    |    | P | P | P |
|          |    |   | *  |    | P |   | M |
| 3.02404  |    |   | ** | ** | P | P | P |
| 0.599281 |    |   |    |    | P | P | P |
| 0.366115 |    |   |    |    | P | P | A |
| 0.540533 |    |   |    |    | P | P | P |
|          |    |   |    |    | P | A | A |
| 46.34201 |    |   | ** | ** |   |   | P |
| 2.879032 |    | * | *  | ** | P | P | P |
| 9.424267 |    | * | ** | ** | P | P | P |
| 3.672411 |    |   |    | *  |   |   | P |
| 0.883642 | *  |   | *  |    | P | P | P |
| 7.427579 |    |   | *  | ** | P | P | P |
| 2.485665 |    |   |    | *  | P | M | P |
| 0.084498 |    |   |    |    | P | P | A |
| 0.83516  |    |   |    |    | P | P | P |
| 0.39177  |    |   |    |    | P | P | P |
| 1.336534 |    |   |    |    | M | M | A |
| 6.488552 | ** |   | ** | ** | P |   | P |

|          |    |    |    |    |   |   |   |   |
|----------|----|----|----|----|---|---|---|---|
| 2.168812 | *  |    |    | *  | P | P | P | P |
| 2.631808 | *  |    |    | *  | P | P | P | P |
| 2.179159 |    |    |    | *  | P | A | A | A |
| 0.398318 |    |    |    |    | P | P | P | A |
| 3.001129 |    |    | *  | ** | P |   | P | M |
| 0.853325 |    |    |    |    | P | P | P | P |
|          |    | *  |    |    | P | P | M |   |
|          |    | ** | *  |    | P | P | P |   |
| 1.541378 |    |    | *  |    | P | P | P | P |
| 2.030015 |    |    |    | *  | P | P | P | P |
| 2.88947  |    |    |    | ** | P | P | P | P |
| 2.311383 |    |    |    | *  | P | P | P | P |
| 7.057978 | *  |    | ** | ** | P | P | P | P |
| 0.970546 |    | *  |    |    | P | P | A | P |
| 1.445549 |    |    | *  |    | P | P | P | P |
| 0.449477 |    |    |    |    | P | P | P | P |
| 0.848852 |    |    |    |    | P | P | P | P |
|          |    | ** |    |    | P | P | A |   |
| 1.037032 |    |    |    |    | P | P | P | A |
| 0.622123 |    |    |    |    | P | P | P | P |
| 0.193774 |    |    |    |    |   |   |   | A |
| 1.229418 | *  |    | *  |    | P | P | P | P |
|          |    |    | ** |    |   |   | P |   |
| 1.957118 |    |    | *  |    | P | P | P | P |
| 0.458441 |    |    |    |    | P | P | A | A |
| 1.395714 |    |    |    |    | P | P | P | P |
| 0.661388 | *  |    |    |    | P | P | P | A |
| 1.142355 | *  |    |    |    | P | P | P | P |
|          |    | *  |    |    | A | P |   |   |
| 2.246473 | *  |    | *  | *  | P | P | P | P |
| 0.987938 |    |    | ** |    | P | P | P | A |
| 1.044356 |    |    | *  |    | P | P | P | M |
| 0.624941 |    |    |    |    | P | P | P | P |
| 2.733746 |    |    |    | *  | P | P | P | P |
|          |    | *  |    |    |   | P |   |   |
| 3.67541  |    |    | ** | *  | P | P | P | P |
| 3.51834  |    |    | ** | *  | P | P | P | P |
|          |    | ** | *  |    | P | M | P |   |
| 1.993237 |    |    | *  |    | P | P | P | P |
| 0.334293 | ** | *  |    |    | P | P | A | A |

|          |    |    |    |    |   |   |   |   |
|----------|----|----|----|----|---|---|---|---|
|          | ** |    |    |    | P |   |   |   |
| 1.850414 |    | *  |    |    | P | P | P | P |
| 0.178162 |    |    |    |    | P | P | P | P |
| 0.155147 |    |    |    |    | P | P | P | P |
| 4.250461 | *  |    | ** | *  | P | P | P | P |
|          |    |    |    |    | A | M |   |   |
| 2.090413 |    |    | *  | *  | P | P | P | P |
| 0.312084 |    |    |    |    | P | P | P | A |
| 0.496563 |    | *  |    |    | P | P | P | P |
|          | *  |    |    |    | P | P | A |   |
| 1.52575  |    |    | ** |    | P |   | P | P |
|          |    |    | *  |    |   | M | P |   |
|          |    |    |    |    | A |   | A |   |
| 2.534082 |    |    |    | *  | P | P | P | P |
| 2.038918 |    |    |    | *  | P | P | P | P |
| 0.116848 |    |    |    |    | P | P | A | A |
| 0.945135 | *  |    | ** |    | P |   | P | A |
| 0.496732 |    |    |    |    | P | P | P | P |
|          |    |    |    |    |   | P | A |   |
| 0.592085 |    |    |    |    | A | A | A | A |
|          | *  |    |    |    | P | A | A |   |
| 0.88028  |    |    | ** |    | P | P | P | P |
| 0.397389 | ** |    |    |    | P | P | P | P |
| 0.776091 |    |    |    |    | P | P | P | P |
| 2.496482 |    |    |    | *  |   |   |   | P |
| 0.482879 |    |    | *  |    | P | M | P | A |
| 0.923082 | *  |    |    |    | P | P | P | A |
|          |    |    |    |    | A | P | A |   |
| 2.15492  |    |    | ** | *  | P | P | P | P |
| 2.216625 | *  | *  | *  | *  | P | P | P | P |
| 0.487132 |    |    |    |    | P | P | P | P |
| 0.750935 |    |    |    |    | P | P | P | P |
| 1.186452 |    |    | *  |    | P | P | P | P |
| 3.138103 | *  |    | ** | ** | P |   | P | A |
|          | *  |    | *  |    | P |   | P |   |
| 1.35846  |    | ** | ** |    | P | P | M | P |
| 5.680441 |    | *  | ** | *  | P | P | P | P |
| 0.736758 | *  |    | *  |    | P | P | P | P |
| 0.629504 |    |    |    |    | P | P | P | P |
| 2.229344 |    |    |    | *  | P | P | P | P |

|          |   |    |    |   |   |   |   |
|----------|---|----|----|---|---|---|---|
| 2.342247 |   |    | *  | P | P | P | P |
| 3.568702 |   |    | *  | P | P | P | P |
| 1.577588 |   | ** |    | P | P | P | P |
| 1.031512 |   | *  |    | P | P | P | P |
| 2.539423 |   |    | *  | P | P | P | P |
| 2.409966 | * | *  | *  | P | P | P | P |
|          |   |    |    | P | A | A |   |
| 1.800816 | * |    |    | P | P | P | P |
| 0.320022 |   |    |    | P | P | P | P |
| 0.563652 |   |    |    | P | P | P | P |
| 0.722    |   |    |    | P | P | A | P |
| 1.562919 |   | *  |    | A | A | P | P |
| 1.476884 |   | ** |    | P | P | P | P |
| 0.138648 |   |    |    | P | P | P | A |
| 0.297367 |   |    |    | P | P | P | P |
| 2.52521  |   |    | *  |   |   |   | P |
| 2.928354 |   | ** | ** | P | P | P | P |
| 0.454618 |   |    |    | P | P | P | P |
| 1.520215 |   | ** |    | P | A | P | P |
| 3.58574  |   | *  | *  | P | P | P | P |
| 0.683339 |   |    |    | P | P | P | P |
| 0.367611 |   |    |    | P | P | P | P |
| 0.62427  | * |    |    | P | P | P | P |
| 0.380603 | * |    |    | P | P | P | P |
| 0.625847 | * |    |    | P | P | P | P |
| 0.330427 |   | *  |    | P | P | P | P |
| 1.404094 |   | *  |    | M | P | P | P |
| 0.310751 |   |    |    | P | P | P | P |
| 7.536146 |   | ** | ** | P | P | P | P |
| 2.97511  |   |    | ** | P | P | P | P |
|          |   | *  |    |   | M | A |   |
|          |   | ** |    |   | P | P |   |
| 1.485342 |   | *  |    | M | P |   | A |
| 9.726717 |   | ** | ** | P | P | P | P |
| 8.01593  |   | ** | ** | P | P | P | P |
| 1.732473 |   | *  |    | P | P | P | P |
| 6.528448 |   | ** | ** | P | P | P | P |
| 7.835237 |   | *  | ** | P | P | P | P |
|          | * |    |    | P | A | P |   |
| 0.250466 |   |    |    | P | P | P | A |

|          |    |   |    |    |   |   |   |   |
|----------|----|---|----|----|---|---|---|---|
| 2.930547 |    |   | ** | ** | P | P | P | P |
| 1.508029 |    |   |    |    | P | P | P | M |
| 3.128389 |    |   |    | ** | P | P | P | P |
|          | ** |   |    |    | M |   |   |   |
| 0.399118 |    |   |    |    | P | P | P | A |
| 2.029621 |    |   | *  | *  | P | A | M | P |
| 1.015401 | ** | * |    |    | P | M | P | M |
| 2.550427 | *  |   | *  | *  | P | P | P | P |
| 0.400536 |    |   |    |    | P | P | P | P |
| 0.327809 |    |   |    |    | P | P | P | A |
| 2.447415 |    |   |    | *  | P | P | P | P |
| 0.201596 |    |   |    |    | A | P | P | P |
| 0.496574 | *  |   |    |    | P | P | P | P |
| 1.366588 | ** |   |    |    | P | P | P | P |
| 0.2521   |    |   |    |    | A |   |   | A |
| 2.233115 |    |   | *  | *  | P | P | P | P |
| 0.444409 |    |   |    |    | P | P | P | P |
| 0.772373 |    |   |    |    | P | P | P | P |
| 2.21535  |    |   |    | *  | P | P | P | P |
|          | ** |   |    |    | P |   | P |   |
| 0.345033 |    |   |    |    | P | P | P | P |
| 0.361188 |    |   |    |    | P | P | P | A |
| 0.890433 |    |   |    |    | P | P | P | P |
| 9.34012  |    |   |    | ** |   |   |   | P |
| 2.858957 |    |   |    | ** | P | P | P | P |
| 1.007492 | *  |   |    |    | P | P | P | P |
| 0.360363 |    |   |    |    | P | P | P | P |
| 1.870547 |    |   | *  |    | P | P | P | P |
|          | ** |   |    |    | P |   |   |   |
| 2.078897 |    | * |    | *  | P | P | P | M |
| 0.41666  |    |   |    |    | P | P | P | P |
| 2.739769 |    |   |    | *  | P | P | P | A |
| 0.467429 |    |   |    |    | P | P | P | P |
| 5.075405 |    |   |    | *  | P |   |   | P |
| 2.009981 |    |   |    | *  |   |   |   | P |
| 0.477447 |    |   |    |    | P | P | P | P |
| 2.306771 |    |   | *  | *  | P | P | P | P |
| 1.950232 |    |   | *  |    | P | P | P | P |
| 2.078876 |    |   |    | *  | P | P | P | P |
| 2.265229 |    |   | *  | *  | P | P | M | P |

|          |    |    |    |    |   |   |   |   |
|----------|----|----|----|----|---|---|---|---|
| 3.481904 |    |    | ** | *  |   | P | P | P |
| 14.28183 | *  |    | *  | ** | P | P | P | P |
| 2.380593 |    |    |    | *  | P | P | P | P |
| 2.57976  |    |    |    | *  | P | P | P | P |
| 4.045724 |    |    |    | *  | P | P | P | P |
| 1.815887 |    |    | *  |    | P | P | P | P |
| 1.425868 | *  | ** | ** |    | P | P | P | P |
| 2.198741 |    |    | *  | *  | P | P | P | P |
|          |    | ** |    |    |   | P | P |   |
| 0.288781 |    |    |    |    | P | P | P | A |
| 0.535898 | ** |    |    |    | P | P | P | P |
| 0.32991  |    |    |    |    | P | P | P | P |
| 0.617724 |    |    |    |    | P | P | P | P |
| 2.602552 |    |    |    | *  | P | P | P | P |
| 2.239764 |    |    | *  | *  | P | P | P | P |
| 1.491705 | *  |    |    |    | P | P | P | P |
|          |    |    |    |    |   | A |   |   |
|          |    |    |    |    | A | A |   |   |
| 0.538067 |    |    |    |    | P | P | P | P |
|          |    | *  |    |    |   | P |   |   |
| 0.486559 |    |    |    |    | P | P | P | P |
|          |    |    |    |    | A |   |   |   |
|          |    |    |    |    | P | P | A |   |
| 1.088604 |    |    |    |    | P | P | P | P |
| 0.928388 |    |    |    |    |   | A | A | P |
| 0.447215 |    |    |    |    | P | P | P | P |
| 0.385817 |    |    |    |    | P | P | P | P |
| 0.483226 |    |    |    |    | M | P | M | P |
|          |    |    |    |    |   |   | A |   |
| 3.181277 |    |    | *  | ** | P | P | P | P |
|          |    |    |    |    |   | A |   |   |
| 2.322931 |    |    | ** | *  | P |   | P | P |
| 0.186242 |    |    |    |    | P | P | P | P |
| 0.622701 |    | ** | *  |    | A | P | P | A |
| 0.324414 |    |    |    |    | P | P | P | P |
| 2.28394  |    |    |    | *  | M | A |   | M |
| 2.304917 |    |    |    | *  | P | P | P | P |
| 2.448551 |    |    | ** | *  | P | P | P | P |
| 0.570318 |    |    |    |    | P | P | P | A |
| 7.04418  |    |    |    | ** | A |   |   | P |

|          |    |   |    |    |   |   |   |   |
|----------|----|---|----|----|---|---|---|---|
| 0.475217 |    |   |    |    | P | P | P | P |
| 0.363579 |    |   |    |    | P | P | P | P |
| 1.275382 |    |   |    |    | P | P | P | P |
|          |    | * | ** |    | P | P | P |   |
| 0.43554  |    |   |    |    | P | P | P | P |
| 0.257968 |    |   |    |    | P | P | P | P |
| 1.734868 |    |   | ** |    | P | P | P | P |
| 0.517258 |    |   |    |    | P | P | P | A |
| 1.713782 | ** |   |    |    | P | P | P | P |
| 2.22425  |    |   | *  | *  | P | P | P | P |
|          | *  |   |    |    | P |   |   |   |
| 1.450377 |    |   |    |    | A | P |   | P |
|          |    |   |    |    | P |   | A |   |
| 5.691897 | *  | * | ** | *  | P | P | P | P |
| 1.070036 | *  |   |    |    | P | P | P | P |
| 2.625043 |    |   | *  | *  | P | P | P | P |
|          |    | * |    |    |   | P | P |   |
| 13.68817 |    |   |    | ** | P | P | M | P |
|          | ** |   |    |    | P |   |   |   |
| 2.866044 |    |   |    | ** | P | P | P | P |
| 0.94367  |    |   |    |    | P | P | P | P |
| 1.25789  | *  |   |    |    | P | P | P | M |
| 2.250072 |    |   |    | *  | P | P | P | P |
| 2.483699 |    |   |    | *  | P | P | P | P |
| 2.017987 |    |   | *  | *  | P | A | P | M |
| 0.892441 | *  |   | ** |    | P | A | M | A |
| 0.599912 |    |   |    |    | P | P | A | A |
| 0.917875 |    |   |    |    | P | P | P | P |
| 0.823687 |    |   |    |    | P | P | P | P |
| 0.787892 |    |   |    |    | P | P | P | P |
| 4.690533 |    |   |    | *  | P | P | P | P |
| 2.793841 |    |   | *  | *  | P | P | P | P |
| 1.838544 |    |   | ** |    | P | P | P | P |
| 1.122939 |    |   |    |    | P | P | P | P |
| 0.69219  | *  |   |    |    | P | P | A | A |
| 0.853074 | *  | * | ** |    | P | P | P | P |
|          |    | * |    |    | M | P |   |   |
| 0.460294 |    |   |    |    | P | P | P | P |
|          | *  |   |    |    | P | M | P |   |
| 7.396891 |    |   | *  | ** | P | P | P | P |



|          |    |    |    |    |   |   |   |
|----------|----|----|----|----|---|---|---|
| 0.492861 |    |    |    | P  | P | P | P |
| 3.876217 | *  |    | ** | *  | M |   | P |
| 0.446135 |    |    |    |    | P | P | P |
| 5.175397 | *  |    | *  | *  | P |   | P |
| 2.491104 |    |    |    | *  | P | P | P |
| 0.709464 |    |    |    |    | P | P | P |
| 1.576338 |    |    | *  |    | P | P | P |
| 0.17767  |    |    |    |    | P | P | P |
| 0.517963 |    |    |    |    | P | P | P |
| 2.175035 |    |    |    | *  | P | P | P |
| 0.828731 |    |    |    |    | P | P | P |
|          | ** |    |    |    | P |   |   |
| 0.766434 |    |    |    |    | P | P | P |
| 0.239204 |    |    |    |    | P | P | P |
| 10.95137 |    | *  | ** | ** | P | P | P |
| 4.842366 |    | *  | *  | *  | P | P | P |
|          |    | *  |    |    | P | P |   |
| 0.565996 |    |    | *  |    | P | P | M |
| 2.329501 | *  |    |    | *  | P | P | P |
| 0.27941  |    |    |    |    | P | P | P |
|          |    | ** | ** |    |   | P | P |
| 1.526043 |    | *  |    |    | A | P |   |
|          |    | *  |    |    |   | P |   |
| 2.254621 |    |    |    | *  | A | P | M |
|          |    | *  | *  |    |   | P | M |
| 0.444871 | ** |    |    |    | A |   | A |
| 2.553926 |    |    | *  | *  | P | P | P |
|          |    |    | ** |    |   | M | P |
| 2.583761 |    |    | *  | *  | P | P | P |
|          | ** |    |    |    | M | A | P |
| 0.457538 |    |    |    |    | P | P | P |
| 1.935882 | *  |    | ** |    | P | A | P |
| 0.201677 |    |    |    |    | P | P | P |
| 0.339411 |    |    |    |    | P | P | P |
| 0.497231 |    |    |    |    | P | P | P |
|          |    |    |    |    | A |   |   |
| 2.61073  |    |    |    | *  | P | P | P |
| 0.843683 | *  | *  |    |    | P | P | P |
|          | ** |    |    |    | P |   |   |
| 2.594974 | *  |    | ** | *  | P | P | P |

|          |    |    |    |   |   |   |   |
|----------|----|----|----|---|---|---|---|
| 2.192683 |    | ** | *  | P | P | P | P |
| 3.123386 |    | ** | ** | P | P | P | P |
| 2.057083 |    | *  | *  | P | P | P | P |
| 3.185816 |    |    | ** | P | P | A | P |
| 0.184889 |    |    |    | P | P | P | A |
| 0.43491  |    |    |    | P | P | P | P |
| 1.181307 | *  |    |    | P | P | P | A |
| 1.02715  | *  |    |    | P | P | P | A |
| 2.369274 |    |    | *  | P | P | P | P |
| 4.33949  |    |    | *  | P |   | P | P |
| 0.533063 |    |    |    | P | P | P | P |
| 0.649942 |    |    |    | P | P | P | P |
| 3.360739 |    | *  | ** | P | P | P | P |
| 0.401147 |    |    |    | P | P | P | P |
| 0.852162 |    |    |    | P | P | P | A |
|          |    |    |    |   | A |   |   |
| 1.972215 |    | *  |    | P | P | P | P |
| 0.740321 |    |    |    | P | P | P | P |
| 0.596532 |    |    |    | P | P | P | P |
| 1.306841 |    |    |    | P | P | P | P |
| 0.48589  |    | *  |    | P | P | A | A |
| 0.959979 |    |    |    | P | P | M | A |
| 2.90481  |    |    | ** | P | A | A | P |
| 0.972662 |    |    |    | P | P | P | P |
| 1.947437 |    | *  |    | P | P | P | P |
| 10.93929 |    | *  | ** |   | M | P | P |
| 0.436341 |    |    |    | P | A |   | A |
| 0.222948 |    |    |    | P | P | P | P |
| 0.928174 |    | ** |    |   | P | P | P |
| 2.058203 | ** |    | *  | P | P | P | P |
| 2.1473   |    |    | *  | P | P | P | P |
| 1.213076 |    | *  |    | P | P | P | P |
| 2.577687 |    |    | *  | P | P | P | P |
| 3.119286 |    | *  | ** | P | P | P | P |
| 0.310406 |    |    |    | P | P | P | A |
|          |    |    |    | P | A | A |   |
| 3.831284 |    |    | *  | P | P | P | P |
| 1.522985 | *  |    |    | M |   | A | A |
| 2.260878 |    | *  | *  | P | P | P | P |
| 4.457136 |    | *  | *  | P | P | P | P |

|          |    |    |    |   |   |   |   |
|----------|----|----|----|---|---|---|---|
| 2.746718 | *  | ** | *  | P | P | P | P |
| 0.681892 |    |    |    | P | P | P | A |
| 0.220639 |    |    |    | P | P | P | A |
| 1.509752 | *  | ** |    | P | P | P | P |
| 1.493613 |    | *  |    | P | P | P | P |
| 0.434351 |    |    |    | P | P | P | P |
| 0.477477 |    |    |    | P | P | P | P |
| 1.355675 |    | *  |    | A | P | P | P |
| 0.791389 |    |    |    | P | P | P | P |
|          | *  |    |    |   | P |   |   |
| 0.397879 |    |    |    | P | P | P | P |
| 2.086814 |    | *  | *  | P | P | P | P |
| 1.552009 | *  |    |    | P | P | P | P |
| 0.568406 | ** |    |    | P | P | P | P |
| 0.811885 |    |    |    | P | P | P | P |
| 0.30038  |    |    |    | P | P | P | P |
| 2.510772 |    |    | *  | P | P |   | P |
|          | *  |    |    | A | P | A |   |
| 0.340281 |    |    |    | P | P | P | A |
|          |    |    |    |   | A |   |   |
|          |    | *  |    | P | A | P |   |
| 0.531729 |    |    |    | P | P | P | P |
| 0.84011  |    |    |    | P | P | A | A |
| 2.202294 |    | *  | *  | P | P | P | P |
|          |    | ** |    | P | P | P |   |
| 6.390789 |    | *  | *  | P | P | P | P |
| 2.496467 |    | *  | *  | P | P | P | P |
| 2.086602 |    |    | *  | P | P | P | P |
| 2.207461 | *  |    | *  | P | P | P | P |
| 0.744433 |    |    |    | P | P | P | P |
| 2.122418 |    |    | *  | P | A | A | M |
| 8.352034 |    | ** | ** |   |   | P | P |
| 4.290926 |    | ** | *  | P | P | P | P |
| 0.256399 |    |    |    | P | P | P | P |
| 0.28828  |    |    |    | P | P | P | A |
| 2.912336 |    | ** | ** | P | P | P | P |
| 1.188728 |    |    |    | P | P | A | A |
| 4.194483 |    |    | *  |   |   | P | P |
| 0.409184 |    |    |    | P | P | P | P |
| 3.089943 |    | ** | ** | P | P | P | P |

|          |    |    |    |    |   |   |   |
|----------|----|----|----|----|---|---|---|
| 0.496487 |    |    |    | P  | P | P | P |
| 3.714698 | *  |    | *  | *  | P | P | P |
| 1.639737 | *  |    |    | P  | A | A | A |
|          |    |    | *  |    |   | M |   |
| 0.346216 |    |    |    | P  | P | A | A |
| 0.676157 | *  |    |    | P  | P | P | A |
| 3.285865 |    |    | *  | *  | P | P | P |
| 0.348943 |    |    |    | P  | P | P | P |
| 0.323211 |    | *  |    | P  | P | A | P |
| 0.601133 |    |    |    | P  | P | P | A |
| 1.185572 | *  |    | *  | P  | P | P | P |
| 0.449189 |    |    |    | P  | P | P | P |
| 0.2808   |    |    |    | P  | P | P | A |
| 2.934028 |    |    | *  | ** | P | P | P |
|          | ** |    |    | P  | P | P |   |
|          |    | ** |    |    | P |   |   |
| 3.035929 |    |    | *  | ** | P | P | P |
| 1.737079 |    |    | ** |    | P | P | P |
| 0.868315 |    |    |    | P  | P | P | P |
|          |    |    |    | P  | P | A |   |
| 1.018807 |    |    |    | P  | P | P | P |
| 0.362579 |    |    |    | P  | P | A | P |
| 0.613731 |    |    |    | P  | P | A | A |
| 1.263119 | *  |    |    | P  | P | P | P |
| 5.537836 |    | *  | *  | *  | P | P | P |
| 0.434858 |    |    |    | P  | P | P | P |
| 0.637017 |    |    |    | P  | P | P | P |
| 0.475936 | *  |    |    | P  | P | P | P |
| 6.60253  |    |    |    | ** |   |   | P |
| 0.992543 |    |    |    | P  | P | P | P |
| 3.377314 |    |    |    | *  | P | P | P |
| 1.377954 |    |    |    | P  | P | P | P |
|          |    |    | *  |    |   | P |   |
| 1.272499 |    |    |    | P  | M | M | A |
| 0.437743 |    |    |    | A  | P | P | A |
| 0.046591 | *  |    | *  | P  | P | P | A |
| 4.20204  |    | *  |    | *  | P | P | P |
| 1.737918 | *  |    | *  | P  | P | P | P |
|          |    |    |    |    |   | A |   |
| 0.43547  |    |    |    | P  | P | P | P |

|          |    |    |    |    |   |   |   |   |
|----------|----|----|----|----|---|---|---|---|
| 0.167207 |    |    |    |    | P | P | P | A |
| 1.09716  | *  | *  |    |    | P | P | A | P |
| 3.245186 |    | *  |    | *  |   | P | A | P |
| 2.221287 |    |    | *  | *  | P | P | P | P |
| 2.15284  |    |    |    | *  | P | P | P | P |
| 2.620291 |    |    |    | *  | A | P | A | P |
| 0.587714 |    |    | *  |    | M | A | P | P |
| 5.218145 |    |    | *  | *  |   |   | P | P |
| 2.49081  | ** |    | ** | *  | P | P | P | P |
|          | *  |    |    |    | P |   | A |   |
| 1.610967 |    |    |    |    | P | M | A | P |
| 1.266343 |    |    | *  |    | P | P | P | P |
| 0.447996 |    |    |    |    | P | P | P | P |
| 0.669025 |    |    |    |    | P | P | P | P |
|          |    |    |    |    | A |   | A |   |
| 8.55589  |    | ** | ** | ** | P | P | P | P |
| 1.598286 |    |    | *  |    | P | P | P | P |
| 1.963405 |    |    | *  |    | P | P | P | P |
| 0.483383 |    |    |    |    | P | P | P | P |
| 0.511235 |    |    |    |    | P | P | P | P |
| 0.448666 |    |    |    |    | P | P | P | P |
| 0.630822 |    |    |    |    | P | P | P | P |
| 0.6753   |    |    |    |    | P | P | P | P |
| 0.471184 |    |    |    |    | P | P | P | P |
| 3.386136 |    |    | *  | *  | P | P | P | P |
| 2.506613 |    |    |    | *  | P | P | P | P |
| 0.519866 |    |    |    |    | P | P | P | P |
| 3.455239 |    |    |    | *  | P | P | P | P |
| 0.232864 |    |    |    |    | P | P | P | A |
| 1.565466 |    |    | *  |    | P | P | P | P |
|          |    | *  |    |    | P | P |   |   |
| 3.700287 |    |    |    | *  | P | P | P | P |
| 1.162696 |    |    | *  |    | P | P | P | P |
| 2.046051 | *  | *  | ** | *  | P | P | P | P |
| 2.998542 | *  |    | *  | ** | P | P | P | P |
|          |    |    |    |    | A |   |   |   |
|          |    |    |    |    | A |   | A |   |
| 2.035766 |    |    |    | *  |   |   |   | M |
| 0.958233 |    |    |    |    | P | A | M | A |
| 3.151122 |    |    |    | ** |   | P | P | P |

|          |    |    |    |    |   |   |   |   |
|----------|----|----|----|----|---|---|---|---|
| 1.309714 |    |    | *  |    | P | P | P | P |
|          |    |    |    |    | P | A | P |   |
| 0.839797 | *  |    |    |    | P | P | P | P |
| 2.361213 |    |    |    | *  | A |   | P | P |
|          |    |    | ** |    | P |   | P |   |
| 1.653852 |    |    | *  |    | P | P | P | P |
| 2.306383 |    |    |    | *  | P | P | P | M |
| 1.477815 |    |    | *  |    | P | P | P | P |
| 0.941126 | *  |    |    |    | P | P | P | P |
| 0.56303  | ** |    |    |    | P | P | P | A |
| 0.69653  | *  |    |    |    | P | P | P | P |
| 1.45661  | ** |    |    |    | P | P | M | M |
| 0.724342 | ** |    |    |    | P | P | A | P |
| 0.739848 | *  |    |    |    | P | P | A | P |
| 4.121557 | ** | ** | ** | *  | P | P | P | P |
|          |    |    |    |    | A | A |   |   |
| 2.294464 |    |    |    | *  | P | P | P | P |
| 0.61013  |    | *  |    |    |   | P |   | A |
| 4.960409 |    |    | *  | *  | P | P | P | P |
| 6.417916 |    |    | *  | *  | P | P | P | P |
| 0.351222 |    |    |    |    | P | P | P | P |
| 26.62335 |    |    | ** | ** |   |   | P | P |
| 0.488117 |    |    |    |    | P | P | P | P |
| 2.376893 |    |    |    | *  | P |   |   | A |
| 0.090195 |    |    |    |    | A |   | A | A |
|          |    |    |    |    |   |   | A |   |
| 0.264862 |    |    |    |    |   | P |   | A |
| 0.491217 |    |    |    |    | P | P | P | P |
| 1.702681 |    | *  |    |    |   | P |   | P |
| 2.661726 |    |    | *  | *  | P | P | P | P |
| 2.889106 |    |    | *  | ** | P | P | P | P |
| 28.91675 | *  |    | *  | ** | P |   | P | P |
| 0.435827 |    |    |    |    | P | P | P | P |
| 1.138634 | *  |    |    |    | P | P | P | P |
| 2.046266 |    |    |    | *  | P | P | P | P |
| 2.240399 |    |    | ** | *  | P |   | P | P |
| 93.25599 | ** |    |    | ** | P | P | P | P |
| 1.308986 |    |    | *  |    | P | P | P | P |
| 0.134822 |    |    |    |    | P | P | P | A |
| 0.558314 |    |    |    |    | P | P | P | P |

|          |    |    |    |   |   |   |   |
|----------|----|----|----|---|---|---|---|
| 1.348557 |    | *  |    | P | P | P | P |
| 2.167814 |    |    | *  | P | P | P | P |
| 1.663295 | ** |    |    | P | P | P | P |
| 0.320755 |    |    |    | P | P | P | P |
| 0.416726 |    |    |    | P | P | P | P |
| 9.376152 |    | ** | ** | P | P | P | P |
| 1.897984 |    | *  |    | P | P | P | P |
|          |    | *  |    | P | A | P |   |
| 1.499337 |    | ** |    | P | P | P | P |
| 0.035113 |    |    |    | P | P | P | A |
| 0.358288 |    |    |    | P | P | A | A |
| 1.467744 |    | ** |    | P | P | P | P |
| 2.105385 |    | *  | *  | P | P | P | P |
| 1.696797 |    | ** |    | P | P | P | P |
| 1.676674 |    | ** |    | P | P | P | P |
| 17.44384 |    |    | ** | A |   |   | M |
| 0.269548 |    |    |    | P | P | P | P |
| 0.750687 |    |    |    | P | P | P | P |
| 1.653441 |    | *  |    | P | P | P | P |
| 2.153659 |    |    | *  | P | P | P | P |
| 0.197736 |    |    |    | P | P | A | A |
| 0.058052 |    | *  |    | P | P | A | A |
| 0.306471 |    |    |    | P | P | P | P |
| 5.119394 | *  | *  | *  | P | P | P | P |
| 1.62068  |    | *  |    |   | P | P | P |
| 26.10055 |    |    | ** |   |   |   | M |
| 3.575951 |    | ** | *  | P | A | P | P |
| 4.106049 |    |    | *  | P | P | M | P |
| 1.119926 |    |    |    | A | P | A | A |
| 0.201366 | *  |    |    | P | P | P | A |
| 0.487976 |    |    |    | P | P | P | P |
| 3.269936 |    |    | *  | P | P | P | P |
|          |    | ** |    |   |   | P |   |
| 2.479496 |    | *  | *  | P | P | P | P |
| 1.45387  |    |    |    | P | P | A | P |
| 0.472696 |    |    |    | P | P | P | P |
| 2.823604 |    | ** | *  | P | A | P | P |
| 1.712619 |    | *  |    | P | P | P | P |
| 3.700928 |    | *  | *  | P | P | P | P |
| 2.629379 |    |    | *  |   |   |   | P |

|          |    |    |    |    |   |   |   |   |
|----------|----|----|----|----|---|---|---|---|
| 1.386677 |    |    | *  |    | P | P | P | P |
|          |    |    |    |    | P | P | P |   |
| 0.253655 | *  |    |    |    | P | A | A | A |
| 0.562093 |    |    |    |    | P | P | P | P |
| 0.385639 |    |    |    |    | P | P | P | P |
| 0.907349 |    |    |    |    | P | P | P | P |
| 2.243344 |    |    |    | *  | P | P | P | P |
|          | ** |    |    |    | P |   | P |   |
| 3.657324 | ** | *  | *  | *  | P | P | P | P |
|          |    |    |    |    |   | A | A |   |
| 2.621855 |    |    | *  | *  | P | P | P | P |
| 1.770558 |    |    | ** |    | A | A | P | M |
| 0.439651 |    |    |    |    | P | P | P | P |
| 1.821035 | *  |    | *  |    | P | P | P | P |
| 2.348908 |    |    | ** | *  | P | P | P | P |
| 5.012683 |    |    | *  | *  | P | P | P | P |
| 0.34516  |    |    |    |    | P | P | A | A |
| 0.483434 |    |    |    |    | P | P | P | P |
| 1.432845 |    |    | *  |    | P | P | P | P |
| 0.036248 |    |    |    |    |   |   |   | A |
| 1.524708 | *  |    |    |    | P | P | P | P |
| 3.183386 |    |    | *  | ** | P | P | P | P |
| 3.47104  |    |    |    | *  | P | P | P | P |
| 2.091639 |    |    |    | *  | P | P | P | P |
| 0.433746 |    |    |    |    | P | P | P | P |
| 1.897578 | *  |    |    |    | P | P | P | P |
| 2.07416  |    |    |    | ** | P | P | P | P |
| 36.23647 | ** | *  | *  | ** | P | P | P | P |
| 4.130565 |    |    | *  | *  | P | P | P | P |
| 2.088213 |    |    |    | *  | P | P | P | P |
| 0.651662 |    |    |    |    | P | P | P | P |
|          |    | *  |    |    |   | P |   |   |
| 0.925104 |    |    | *  |    | P | P | P | P |
| 1.290045 |    |    |    |    | P | A | P | M |
| 0.518372 |    |    |    |    | P | P | P | A |
| 0.276817 |    |    |    |    | P | P | P | A |
|          |    | ** |    |    |   | P | P |   |
| 1.42919  |    | *  |    |    | P | P | P | P |
| 0.177416 |    |    |    |    | P | P | P | A |
| 0.741235 | *  |    |    |    | P | P | P | P |



|          |   |    |    |    |   |   |   |
|----------|---|----|----|----|---|---|---|
| 1.774311 | * |    | ** | P  | P | P | P |
| 0.576494 |   |    | *  | P  | P | P | P |
|          | * | ** | ** | P  | P | P |   |
| 0.418506 |   | *  |    | P  | P | P | P |
| 0.738857 |   | *  |    | P  | P | A | A |
| 3.006098 |   |    |    | ** | P | P | P |
| 1.913451 |   |    |    |    | P | P | P |
| 0.177101 |   |    |    |    | P | P | P |
| 3.827452 |   |    |    | *  | P |   | P |
|          |   |    |    |    |   | A |   |
| 2.006481 |   |    |    | *  | P | P | P |
| 0.428992 |   |    |    |    | P | P | P |
| 0.477829 |   |    |    |    | P | P | P |
| 0.885081 | * |    |    |    | P | P | P |
| 1.338999 | * |    | *  |    | P | P | P |
| 0.567224 |   |    |    |    | A | P | A |
| 1.641402 |   | *  |    |    | P | P | P |
|          |   |    |    |    | P | P | A |
| 0.486818 |   |    |    |    | P | P | P |
| 0.351891 |   |    |    |    | P | P | P |
| 1.677829 |   |    | *  |    | P | P | P |
|          |   |    |    |    | P | P | A |
| 2.588984 |   |    | *  | *  | P | P | P |
| 1.666384 |   |    |    |    | P | P | P |
| 0.4433   |   |    |    |    | P | P | P |
| 1.330544 |   |    |    |    | P | P | P |
| 0.25568  |   |    |    |    | P | P | P |
| 2.872869 |   |    | *  | ** | P | P | P |
| 1.216023 |   |    |    |    | P | P | P |
| 0.831569 |   |    |    |    | P | P | P |
| 0.261363 |   |    |    |    | P | P | P |
| 0.230241 |   |    |    |    | P | P | P |
| 1.38266  |   |    |    |    | P | P | P |
| 3.447224 |   |    | *  | *  | P | P | P |
| 1.540784 |   |    |    |    | P | P | P |
| 2.056406 | * | *  |    | *  | P | P | P |
| 1.088188 |   |    |    |    | P | P | P |
| 3.017573 |   |    | *  | ** | P | P | P |
|          |   |    |    |    | A |   | P |
| 1.818531 |   |    | *  |    | P | P | P |

|          |    |    |    |    |   |   |   |
|----------|----|----|----|----|---|---|---|
| 3.009356 |    |    | ** | P  | P | P | P |
| 0.63371  |    |    |    | P  | P | A | A |
| 2.250231 |    |    | *  | P  | P | P | P |
| 0.117229 |    |    |    | P  | P | P | A |
| 0.878662 |    | ** |    | P  | P | P | P |
| 2.173814 |    |    | *  | P  | P | P | P |
| 2.549513 |    |    | *  |    |   | P | P |
| 0.228422 |    |    |    | P  | P | P | A |
| 0.65645  | *  |    |    | P  | P | P | P |
| 2.800996 |    |    | *  | P  | P | P | P |
| 22.91228 |    | *  | ** |    | P |   | M |
| 5.741044 |    |    | *  | P  | P | P | P |
| 0.498498 |    |    |    | P  | P | P | P |
| 0.325763 |    |    |    | P  | P | P | P |
| 0.532648 |    |    |    | P  | P | P | P |
|          |    | *  |    |    |   | P |   |
|          | ** |    |    | P  |   |   |   |
| 2.085719 |    |    | *  | P  | P |   | P |
| 0.478958 |    |    |    | P  | P | A | A |
| 2.860765 |    |    | ** | P  | P | P | P |
| 2.156641 |    |    | *  | P  | P | P | P |
| 2.314365 |    |    | *  |    |   |   | A |
| 5.461037 |    | *  | ** | *  | P | P | P |
| 13.09777 |    | ** | ** | ** | P | P | P |
| 1.207944 |    |    | *  |    | P | P | P |
| 0.241095 |    |    |    |    | P | P | P |
| 2.614112 |    |    | ** | *  | P | P | P |
|          |    |    | ** |    |   | M |   |
|          |    |    | *  |    | A | M |   |
| 4.990056 |    |    | *  | *  | P | P | P |
| 0.304726 |    |    |    |    | P | P | P |
| 0.333585 |    |    |    |    | P | P | P |
| 2.049242 |    |    | *  |    | P | P | P |
| 2.138836 |    |    | *  |    | P | P | P |
| 2.452033 |    |    | *  |    | P | P | P |
| 0.280311 |    |    |    |    | P | P | A |
| 0.713003 | *  |    |    |    | P | P | P |
| 0.415872 |    |    |    |    | P | P | P |
|          |    |    |    |    |   | A |   |
|          | ** |    |    | P  |   |   |   |

|          |    |    |    |    |   |   |   |   |
|----------|----|----|----|----|---|---|---|---|
| 2.28984  |    |    | *  | *  | P | P | P | P |
|          | *  |    |    |    | P | M | A |   |
| 0.94861  | ** |    |    |    | P | P | P | P |
| 0.750671 |    |    |    |    | P | P | P | M |
| 0.499537 |    |    |    |    | P | P | P | P |
| 2.011442 |    |    |    | *  | P | P | P | P |
|          |    | *  |    |    | P | P | A |   |
| 0.490891 |    |    |    |    | P | P | P | P |
| 2.201374 |    |    |    | *  | A | A |   | P |
| 0.469445 |    |    |    |    | P | P | P | P |
| 0.490945 |    |    |    |    | P | P | P | P |
| 1.022643 | *  |    |    |    | P | P | P | P |
| 0.318296 |    |    |    |    | P | P | P | P |
| 0.78604  |    |    |    |    | P | P | P | P |
| 0.496543 |    |    |    |    | P | P | P | A |
| 13.18439 | *  | *  | ** | ** | P | P | P | P |
| 15.31266 | *  | *  | ** | ** | P | P | P | P |
|          | ** |    |    |    | P | A |   |   |
| 0.490713 |    |    |    |    | P | P | P | P |
| 0.244958 |    |    |    |    | P | P | P | P |
| 2.491556 |    |    | ** | *  | P | P | P | P |
| 1.996271 | *  |    |    |    | P | P | P | P |
| 1.030884 |    |    |    |    | P | P | P | P |
| 0.365672 |    |    |    |    | P | P | P | P |
| 1.956381 |    |    |    |    | P | P | P | M |
| 0.212213 |    |    |    |    | P | P | P | P |
| 0.359232 |    |    |    |    | P | P | P | P |
| 0.11089  |    |    |    |    | M | P | A | A |
| 1.657716 |    |    | *  |    | P | P | P | P |
| 0.492595 |    |    |    |    | P | P | P | P |
| 0.476545 |    |    |    |    | P | P | P | P |
| 0.404743 |    |    |    |    | P | A | A | A |
| 0.418503 |    |    |    |    | P | P | P | P |
|          |    | *  |    |    |   | M | A |   |
| 7.412905 |    |    | ** | ** | P | P | P | P |
|          |    | ** |    |    |   | P |   |   |
| 0.662681 |    |    |    |    | P | P | P | P |
| 0.490423 |    |    |    |    | P | P | P | P |
|          |    |    |    |    |   |   | A |   |
| 4.857563 |    |    | ** | *  | P | P | P | P |

|          |    |    |    |   |   |   |   |
|----------|----|----|----|---|---|---|---|
| 0.56667  |    | *  |    | P | P | A | A |
| 2.080885 |    |    | *  | P | P | P | P |
| 2.557097 |    |    | *  | P | P | P | P |
|          |    |    |    | P | P | A |   |
| 0.32875  |    |    |    | P | P | P | P |
| 0.478962 |    |    |    | P | P | P | M |
| 0.551426 |    |    |    | P | P | P | P |
| 0.940609 |    |    |    | P | P | P | P |
| 0.238338 |    |    |    | P | P | P | P |
| 0.294321 |    |    |    | P | P | A | A |
| 0.958222 |    | *  |    | P | P | P | P |
| 0.445466 |    |    |    |   |   | A | A |
| 0.965788 |    |    |    | P | P | P | P |
| 3.906417 |    | ** | *  | P | P | P | P |
| 12.31827 | *  |    | ** | M |   | A | P |
| 0.730377 |    |    |    | P | P | P | A |
|          |    | *  |    |   |   | P |   |
| 1.300913 |    | *  |    | P | P | P | P |
|          |    | *  |    |   | M |   |   |
|          |    |    |    | A | A |   |   |
| 6.848544 |    | ** | ** |   | P | A | P |
| 0.42495  |    |    |    | P | P | P | P |
| 0.164151 |    |    |    |   |   |   | A |
| 0.648299 | ** |    |    | P | P | P | P |
| 1.027196 |    |    |    | P | P | P | P |
| 0.217536 |    |    |    | P | P | P | P |
| 5.213965 |    | ** | *  | P | P | P | P |
| 3.812154 |    |    | *  |   | P | P | P |
| 1.935586 |    | *  |    | P | P | P | P |
| 6.147658 |    | ** | *  | P | P | P | P |
| 0.446721 |    |    |    | A | P | A | A |
| 2.174109 |    | *  | *  | P | P | P | P |
|          |    | ** |    | M | M | M |   |
|          |    |    |    | A |   |   |   |
| 0.572973 |    |    |    | P | P | P | P |
| 0.868112 |    |    |    | P | P | P | P |
| 6.099035 |    | ** | *  | P | P | P | P |
| 0.348176 |    |    |    |   |   |   | A |
| 0.174272 | *  |    |    | P | P | P | A |
| 0.495264 | *  |    |    | P | P | P | P |

|          |    |    |    |   |   |   |   |
|----------|----|----|----|---|---|---|---|
| 2.043765 | *  |    | *  | P | P | P | P |
| 2.581531 | *  | *  | *  | P | P | P | P |
| 0.316213 | *  |    |    | P | P | P | P |
| 1.969484 |    | *  |    | P | P | P | P |
| 1.831189 |    |    |    |   | A | P | A |
| 1.186473 | *  |    |    | P | P | A | P |
| 1.986945 |    |    |    | P | P | P | M |
| 0.326129 |    |    |    | P | P | P | P |
| 2.039396 |    |    | *  | P | P | P | P |
| 4.057175 |    |    | *  | A | P | M | M |
| 3.074019 |    | *  | ** | P | P | P | P |
| 0.475401 |    |    |    | P |   | A | A |
| 2.057367 |    |    | *  | P | P | P | P |
| 2.017164 |    |    | *  | P | P | M | P |
|          |    |    |    |   | A |   |   |
| 0.993707 | *  |    |    | P | P | P | P |
| 2.722599 |    | *  | *  | P | P | P | P |
| 0.462731 |    |    |    | P | P | P | P |
| 0.49978  |    |    |    | P | P | P | P |
| 0.096254 |    |    |    | A | P |   | A |
| 0.183788 |    |    |    | P | P | P | P |
| 3.323501 |    |    | *  |   |   | A | P |
| 4.752247 |    | *  | *  | P | P | P | P |
| 0.47661  |    |    |    | P | P | P | A |
| 2.023007 |    | *  | *  | P | P | P | P |
| 0.422634 |    |    |    | P | P | P | P |
| 2.142985 |    | ** | *  | P | P | P | P |
| 1.148799 | *  | *  |    | P | P | P | P |
| 1.220271 |    | *  |    | P | P | P | P |
| 0.722312 |    | *  |    | P | P | P | P |
| 1.624301 |    |    |    | P | P | A | P |
| 63.90585 |    | ** | ** |   |   | P | P |
| 1.256273 |    |    |    | P | P | P | P |
| 0.497406 |    |    |    | P | P | P | P |
| 0.488265 | *  |    |    | P | P | P | P |
| 0.254084 |    |    |    | P | P | A | A |
| 2.041557 |    |    | *  | P | P | P | P |
| 0.762106 | *  |    |    | P | P | A | A |
| 5.440571 | ** | *  | ** | * | P | P | P |
| 0.600332 |    |    |    |   | P | P | P |

|          |    |    |    |    |   |   |   |
|----------|----|----|----|----|---|---|---|
| 0.320891 |    |    |    | P  | P | P | P |
| 1.021851 |    |    |    | P  | P | P | P |
| 2.819635 |    | *  | *  | P  | P | P | P |
| 1.764731 |    |    |    | P  | P |   | M |
|          | *  | *  |    | P  | P | P |   |
| 5.468361 |    |    | *  | M  |   | A | P |
|          | *  |    |    | P  | A | A |   |
| 0.638175 |    |    |    | P  | P | P | P |
| 0.704436 |    |    |    | P  | P | P | P |
| 0.492787 |    |    |    | P  | P | P | P |
| 0.656707 |    |    |    | P  | P | P | P |
| 0.31932  |    |    |    | P  | P | P | P |
| 0.380608 |    |    |    | P  | P | P | P |
| 0.381535 |    |    |    | P  | P | P | P |
| 0.280162 |    |    |    | P  | P | P | P |
| 0.511428 |    |    |    | P  | P | P | P |
| 0.314641 |    |    |    | P  | P | P | P |
| 0.115267 |    |    |    | M  | P | M | A |
|          |    |    |    |    | A |   |   |
| 0.166604 |    | ** |    |    | M |   | A |
| 0.463897 |    | *  |    | P  | P | P | P |
| 0.186046 |    |    |    | P  | P | P | A |
|          | ** |    |    | P  |   |   |   |
| 0.310517 |    |    |    | P  | P | P | P |
| 0.591142 |    |    |    | P  | P | P | A |
| 0.164543 |    |    |    | P  | P | P | P |
| 2.018229 |    |    | *  | P  | P | P | P |
| 0.948013 |    | *  |    | P  | P | P | P |
| 0.661098 |    |    |    | P  | P | P | P |
| 9.790428 | *  | *  | *  | ** | P | P | P |
| 7.059926 |    |    | *  | ** | P | P | P |
| 11.4648  | *  | *  | ** | ** | P | P | P |
| 4.931367 |    |    | ** | *  | P | P | P |
| 65.19303 |    |    | ** | ** | P | P | P |
| 2.161343 |    |    | *  | *  | P | P | P |
| 2.126618 |    |    | *  | *  | P | P | P |
| 1.372206 |    |    | ** |    | P | P | P |
| 4.112507 |    |    | ** | *  | P | P | P |
| 0.063196 |    |    |    |    | A |   | A |
| 2.125548 |    |    |    | *  | P | P | P |

|          |   |    |    |    |   |   |   |
|----------|---|----|----|----|---|---|---|
| 0.503695 |   |    |    | P  | P | P | P |
| 2.611575 |   |    | *  |    |   |   | P |
| 9.472492 |   | ** | ** | P  | P | P | P |
| 5.11793  |   |    | *  | P  | P |   | M |
| 2.820387 |   | *  | *  | P  | P | P | P |
| 2.774681 |   | *  | *  | P  | P | P | P |
| 2.219339 |   |    | *  | P  | P | P | P |
| 1.831373 |   |    |    | A  | P | P | M |
| 3.124086 | * | ** | ** | P  | P | P | P |
| 3.4893   | * | *  | *  | P  | P | P | P |
| 0.402692 |   |    |    | P  | P | P | P |
| 0.437408 |   |    |    | P  | P | P | P |
| 2.203443 |   |    | *  | P  | P | A | A |
| 7.321194 |   | *  | ** | P  | P | P | P |
| 1.530919 |   |    |    | P  | P | P | P |
| 2.564463 |   |    | *  | P  |   |   | P |
|          |   | ** |    |    | A | P |   |
| 4.143288 |   | *  | ** | *  | P | P | P |
| 3.891492 |   | *  | ** | *  | P | P | P |
|          |   | *  |    |    | P |   |   |
| 0.473793 |   |    |    | P  | P | P | P |
|          |   |    |    |    |   | A |   |
| 0.812421 |   |    |    | A  |   | A | P |
| 1.758924 |   | *  |    | P  | P | P | P |
| 0.943905 |   |    |    | P  | P | P | A |
| 29.98113 |   | *  | ** | ** | P | P | P |
|          |   | *  |    |    | P | P |   |
|          | * |    |    | P  |   |   |   |
|          |   | *  |    | P  | P | P |   |
| 0.403411 |   |    |    | P  | M | P | A |
|          |   | ** |    | P  | P |   |   |
| 10.3802  |   |    | ** |    |   |   | M |
| 0.355494 |   |    |    | P  | P | P | A |
| 3.029491 |   |    | ** | A  | P |   | P |
| 2.169219 |   | *  | *  | *  | P | P | P |
| 1.87331  | * |    |    |    | P | P | P |
| 0.394097 |   |    |    |    | P | P | P |
| 2.58243  |   |    | *  |    |   | A | P |
| 0.456476 |   |    |    | P  | P | P | A |
| 1.100036 |   | *  |    | P  |   | P | P |

|          |    |    |    |    |   |   |   |   |
|----------|----|----|----|----|---|---|---|---|
| 1.954719 |    |    | ** |    | P | P | P | P |
| 7.33583  |    |    | *  | ** |   |   | M | M |
|          |    |    |    |    | P | A | P |   |
| 1.199486 |    |    |    |    | P | P | P | P |
| 0.913477 |    |    |    |    | P | P | P | P |
| 0.824561 |    |    |    |    | P | P | P | P |
| 2.786072 |    |    |    | *  |   |   | P | P |
|          |    |    |    |    |   |   | A |   |
| 6.218312 | ** | ** | ** | *  | P | P | P | P |
| 2.462244 |    |    | *  | *  | P | P | P | P |
| 1.60972  |    |    | ** |    | P | P | P | P |
| 3.971172 | *  |    | *  | *  | P | P | P | P |
| 0.363547 |    |    |    |    | P | P | P | P |
|          | *  |    |    |    | P |   |   |   |
| 0.917185 | *  |    |    |    | P | P | P | P |
|          | *  |    |    |    | P |   |   |   |
| 0.73484  |    | ** |    |    | P | P | P | M |
| 1.634362 | *  |    |    |    | P | P | P | P |
|          |    | ** |    |    | A | M |   |   |
| 5.622801 |    |    | *  | *  | P | P | P | P |
| 0.64377  |    |    |    |    | P | P | P | P |
| 2.273073 | ** |    | ** | *  | P | P | P | P |
| 1.950779 |    |    | ** |    | P | P | P | P |
| 2.147552 |    |    | *  | *  | P | P | P | P |
| 0.368481 |    |    |    |    | P | P | P | P |
| 2.079632 | *  |    |    | *  | P | P | P | P |
| 0.131996 |    |    |    |    | P | P | P | P |
| 0.954039 |    |    | *  |    | P | A | P | P |
| 27.25519 |    | *  | ** | ** | P | P | P | P |
| 2.445743 |    |    |    | *  | P | P | P | P |
| 2.783627 |    |    |    | *  | P | P | P | P |
|          |    |    |    |    | A |   |   |   |
| 0.744584 |    |    |    |    | P | P | P | P |
|          |    |    |    |    | P | P | P |   |
| 12.04317 |    |    | ** | ** | P | P | P | P |
| 0.288149 |    |    |    |    | P | P | P | M |
| 0.678323 |    |    |    |    | P | P | P | P |
| 2.146928 |    |    |    | *  | P | P | P | P |
| 11.32108 | ** |    |    | ** | P |   | P | P |
| 0.657146 |    |    |    |    | P | P | P | P |



|          |    |   |    |    |   |   |   |
|----------|----|---|----|----|---|---|---|
| 0.471566 |    |   |    | P  | P | P | P |
| 0.493335 |    |   |    | P  | P | P | A |
| 0.898447 |    |   |    |    | P | A | A |
| 0.209886 |    |   |    |    |   |   | A |
| 1.357679 |    | * |    | P  | P | P | P |
| 0.492049 |    |   |    | P  | P | P | P |
| 1.124756 |    |   |    | P  | P | P | P |
| 0.43349  |    |   |    | P  | P | P | P |
|          |    |   |    | P  | A | M |   |
| 1.291917 | ** |   | *  | P  | P | P | P |
| 2.025211 |    |   | *  | *  | P | P | P |
| 5.407212 |    |   | ** | *  | P | P | P |
|          |    |   |    |    | P | A |   |
| 0.832864 |    |   | *  |    | P | P | P |
| 0.713408 |    |   |    |    | P | P | P |
| 1.089419 |    |   |    |    | P | P | P |
| 1.816249 |    |   | *  |    | P | P | A |
| 2.172297 |    |   |    | *  | P | P | P |
| 5.653346 |    | * | ** | *  | P | P | P |
| 1.828092 | ** |   | *  |    | P | P | P |
| 0.286538 |    |   |    |    | P | P | P |
| 0.136059 |    |   |    |    | P | P | A |
| 0.475643 |    |   |    |    | P | P | P |
| 1.739726 | *  |   |    |    | P | P | P |
| 2.326793 |    |   |    | *  | P | P | P |
| 2.148908 |    |   |    | *  | P | P | P |
| 0.133879 |    |   |    |    | P | P | A |
|          |    |   | ** |    | A | P | P |
| 0.769132 |    |   |    |    | P | P | P |
| 2.961676 | *  |   |    | ** | P | P | P |
| 0.612211 |    |   |    |    | P | P | P |
| 0.537541 |    |   |    |    | P | P | P |
| 0.519469 |    |   |    |    | P | P | P |
| 0.486439 |    |   |    |    | P | P | P |
| 2.289671 |    |   |    | *  | P | P | P |
|          | ** |   |    |    | P | P | P |
| 5.136583 | ** | * | ** | *  | P | P | P |
| 2.287388 |    |   |    | *  | P | P | P |
| 0.350372 |    |   |    |    | P | P | P |
| 2.263951 |    |   |    | *  | P | A | P |

|          |    |    |    |   |   |   |   |
|----------|----|----|----|---|---|---|---|
| 4.817841 |    | ** | *  | P | P | P | P |
| 2.436263 |    |    | *  |   |   |   | P |
| 0.336886 |    |    |    | P | P | P | P |
| 0.233843 |    |    |    | P | P | P | A |
| 2.414947 |    | ** | *  | P | P | P | P |
| 5.865502 | *  | *  | *  | P | P | P | P |
| 7.268754 |    | *  | ** | P | P | P | P |
| 0.448843 |    |    |    | P | P | P | P |
| 3.011712 | *  |    | ** | P | P | P | P |
| 2.33816  |    |    | *  | P | P | P | P |
| 9.952597 |    | ** | ** | P | P | P | P |
|          | ** |    |    | P |   | A |   |
| 0.562177 |    |    |    |   | P | A | A |
| 0.938652 | *  |    |    | P | P | P | P |
| 2.166159 |    | ** | *  | P | P | P | P |
| 2.770874 |    |    | *  | P | P | P | P |
| 2.0872   |    |    | *  | P | P | P | P |
| 1.112526 |    |    |    | P | P | P | P |
|          |    | *  |    | P | P | P |   |
| 0.651907 |    |    |    | P | P | P | P |
| 0.418938 |    |    |    | P | P | P | P |
| 4.073749 |    | *  | *  | P | P | P | P |
| 0.247814 |    |    |    | P | P | P | P |
| 2.698156 |    | *  | *  | P | P | P | P |
| 1.232348 |    |    |    | A |   |   | P |
| 0.465228 |    |    |    |   |   |   | A |
| 2.31816  |    |    | *  | P | P | P | P |
|          |    |    |    | P | P | P |   |
| 0.142609 |    |    |    | P | P | P | A |
| 0.744488 |    |    |    | P | P | P | P |
| 2.032028 |    |    | *  |   | M | P | A |
| 0.252349 |    |    |    | P | P | P | P |
|          |    |    |    | A |   |   |   |
| 0.249289 |    |    |    | P | P | P | P |
| 3.122352 |    |    | ** | P | P | P | P |
| 1.04413  |    | ** |    | P | M | P | A |
| 2.255569 |    |    | *  | P | P | P | P |
| 2.109516 |    |    | *  | P | P | P | P |
| 2.526515 |    | ** | *  | A | P | P | M |
| 0.934058 |    |    |    | P | P | P | P |

|          |    |    |    |    |   |   |   |   |
|----------|----|----|----|----|---|---|---|---|
| 1.927424 |    | *  |    |    | P | P | P | P |
| 0.993886 |    |    | *  |    | P | P | P | P |
| 1.105246 |    | *  |    |    | P | P | P | A |
| 2.447169 |    | *  |    | *  | P | P | P | P |
| 0.236673 | *  |    |    |    | P | P | P | A |
| 0.270609 |    |    |    |    | P | P | P | A |
| 1.274936 |    | *  |    |    |   | P |   | A |
| 0.426263 |    |    |    |    | P | P | P | P |
| 0.497369 |    |    |    |    | P | P | P | P |
| 0.747086 |    |    |    |    | P | P | P | P |
| 2.040765 |    |    |    | *  | P | P | P | P |
| 3.512687 |    |    | *  | *  | P | P | P | P |
| 0.227601 |    |    |    |    | P | P | P | P |
| 1.890893 |    |    |    |    | P | P | M | A |
| 3.302209 |    |    | ** | *  | P | P | P | P |
| 0.451755 |    |    |    |    | P | P | P | P |
| 1.867494 |    | *  |    |    | P | P | P | A |
|          | *  |    | ** |    | P |   | P |   |
| 0.208849 |    |    |    |    |   |   |   | A |
| 2.022219 |    |    |    | *  | P | P | A | P |
| 0.285214 |    |    |    |    | P | P | P | P |
| 6.472585 | ** | *  | ** | ** | P | P | P | P |
| 1.035448 |    |    | *  |    | P | P | P | P |
| 3.087601 |    |    |    | ** | P | P | P | P |
| 2.353887 | *  | ** | *  | *  | P | P | P | P |
| 0.488417 |    |    |    |    | P | P | P | P |
| 0.432977 |    |    |    |    | P | P | P | P |
|          |    |    |    |    | P | A |   |   |
| 2.131354 |    |    | *  | *  | P | P | P | P |
| 0.362021 |    |    |    |    | P | P | P | P |
| 1.393518 | *  |    |    |    | P | P | P | P |
| 2.183643 |    |    |    | *  | P | P | P | P |
| 0.389037 |    |    |    |    | P | P | P | P |
| 5.846126 |    |    | ** | *  | P | P | P | P |
| 0.387258 |    |    |    |    | P | P | P | P |
|          |    |    |    |    | A |   |   |   |
| 0.725638 | ** |    |    |    | P | P | P | A |
|          |    |    |    |    | P | P | A |   |
|          | *  |    |    |    | M | P |   |   |
| 0.381201 |    |    |    |    | P | P | P | P |

|          |   |   |    |    |   |   |   |   |
|----------|---|---|----|----|---|---|---|---|
| 2.055734 |   |   | ** | *  | P | P | M | P |
| 0.340423 |   |   |    |    | P | P | P | P |
| 0.309117 |   |   |    |    | P | P | P | P |
| 4.322422 | * | * | ** | *  | P | P | P | P |
| 2.582135 |   |   |    | *  | P | P | P | P |
|          |   |   |    |    |   | A |   |   |
| 2.322713 |   |   |    | *  |   |   | A | P |
| 0.434797 |   |   |    |    | P | P | P | P |
| 0.044779 |   |   |    |    | A | P |   | A |
| 0.362664 |   |   |    |    | P | P | P | M |
| 0.558332 |   |   |    |    | P | P | P | A |
| 1.258616 |   |   |    |    | M | P | P | A |
| 0.812099 |   |   |    |    | P | P | P | P |
| 2.575205 |   |   | ** | *  | P | P | P | P |
|          | * |   |    |    | P |   | P |   |
| 0.254572 |   |   |    |    | P | P | P | P |
| 2.316627 | * | * | *  | *  | P | P | P | P |
| 0.729247 |   |   | *  |    | P | P | P | P |
| 1.046982 |   |   |    |    | P | P | P | P |
| 3.092936 |   |   | *  | ** | P | P | P | P |
| 0.440386 |   |   |    |    | P | P | P | P |
| 2.508557 |   |   |    | *  | P | P | P | P |
| 0.799067 | * |   |    |    | P |   | A | A |
| 2.274206 |   |   | *  | *  | P | P | P | P |
| 1.7424   | * |   |    |    | P | P | A | P |
|          |   |   | *  |    |   |   | P |   |
|          |   |   |    |    | P | P | P |   |
| 2.248604 |   |   |    | *  | P | P | P | P |
| 1.908016 |   |   | *  |    | P | P | P | P |
|          |   |   |    |    | A |   | A |   |
| 0.318523 |   |   |    |    | P | P | P | P |
| 0.40511  |   |   |    |    | P | P | P | P |
|          |   |   |    |    | A |   |   |   |
| 0.416575 |   |   |    |    | P | P | P | P |
| 2.313827 |   |   |    | *  | P | P | P | P |
|          |   |   |    |    | P | P | A |   |
| 0.294288 |   |   |    |    | P | P | P | P |
| 0.78731  |   |   |    |    | P | P | P | P |
| 0.409235 |   |   |    |    | P | P | P | P |
| 0.688875 |   | * |    |    | P | P | P | P |

|          |   |   |    |    |   |   |   |   |
|----------|---|---|----|----|---|---|---|---|
| 8.588906 | * | * | ** | ** | P | P | P | P |
| 2.828006 | * |   | *  | *  | P | P | P | P |
| 0.740585 | * |   |    |    | P | P | P | P |
| 5.4265   |   |   | ** | *  | P | P | P | P |
|          |   |   | ** |    |   |   | P |   |
| 0.06842  |   |   |    |    |   |   |   | A |
| 2.434155 |   |   |    | *  |   |   | A | P |
| 2.604283 |   |   |    | *  | P | P | A | P |
| 6.243366 | * |   | *  | *  | P | A | P | P |
| 4.504242 | * |   |    | *  | P | P | P | P |
| 3.260728 |   |   | *  | *  | P | P | P | P |
| 2.206162 |   |   | *  | *  | P | P | P | P |
| 1.21529  | * | * |    |    | P | P | P | P |
| 0.367351 |   |   |    |    | P | P | P | P |
| 1.333508 |   | * | ** |    | P | P | P | P |
| 1.566588 |   |   | ** |    | P | P | P | P |
| 2.495909 |   | * | ** | *  | P | P | P | P |
| 1.117213 |   | * | *  |    | P | P | P | P |
| 0.468626 |   |   |    |    | P | P | P | P |
| 1.22025  | * |   | *  |    | P | P | P | P |
|          |   |   |    |    | P | A | A |   |
| 1.873819 |   |   | *  |    | P | P | P | P |
| 1.423772 |   |   | *  |    | P | P | P | P |
| 1.347388 | * |   | ** |    | P | M | P | P |
| 2.612915 |   |   |    | *  | P | P | P | P |
| 2.414121 |   |   |    | *  | P | P | P | P |
| 0.553152 |   |   |    |    | P | P | P | P |
| 0.410045 |   |   |    |    | P | P | A | P |
| 0.836081 |   |   |    |    | P | P | P | P |
| 2.336121 |   |   | *  | *  | P | P | P | P |
| 0.214263 |   |   |    |    | P | P | P | P |
| 0.367241 |   |   |    |    | P | P | P | P |
| 0.290696 | * |   |    |    | P | P | P | P |
| 0.579958 |   |   |    |    | P | P | P | P |
| 0.460576 |   |   |    |    | A | P |   | A |
| 0.582569 | * |   |    |    | P | P | P | P |
| 5.65342  |   |   |    | *  |   |   |   | P |
| 0.30571  |   |   |    |    | P | P | A | A |
| 1.008732 |   |   | *  |    | P | P | P | P |
| 0.464459 |   |   |    |    | P | P | P | P |

|          |    |   |   |    |   |   |   |
|----------|----|---|---|----|---|---|---|
| 1.900381 |    |   | * | P  | P | P | P |
| 1.432844 |    | * |   |    | P |   | A |
|          | ** |   |   | P  |   |   |   |
| 0.760411 |    |   |   | P  | P | A | P |
| 2.324117 |    |   | * | *  | P | P | P |
| 1.283669 | *  |   |   | P  | P | P | P |
|          |    |   |   |    |   | A |   |
| 1.171564 |    | * |   | P  | P | P | A |
| 2.705351 |    |   | * | *  | P | P | P |
| 1.829631 |    |   | * |    | P | P | P |
| 0.398975 |    |   |   |    | P | P | P |
| 0.114612 |    |   |   |    |   | P | A |
| 1.794319 |    |   | * |    | P | P | P |
|          |    |   |   |    | P | A |   |
| 1.273444 |    | * | * |    | P | P | P |
|          |    |   |   |    |   | P |   |
| 3.91367  |    |   |   | *  | P | P | P |
| 0.094644 |    |   |   |    | P | P | A |
| 0.212704 |    |   |   |    | P | P | P |
| 2.116436 |    |   |   | *  | P | P | P |
| 2.325428 |    |   |   | *  |   | A | M |
| 2.923432 |    |   |   | ** |   | A | P |
| 0.456032 |    |   |   |    | P | P | P |
| 0.130464 |    |   |   |    |   |   | A |
| 0.229581 |    |   |   |    | P | P | P |
| 0.852904 |    |   |   |    | P | P | P |
| 0.395046 |    |   |   |    | P | P | P |
| 2.035474 |    |   |   | *  | P | P | P |
| 2.37371  |    |   |   | *  | P | P | P |
|          |    | * |   |    |   | P |   |
| 0.390615 |    |   |   |    | P | P | P |
| 3.531745 |    |   |   | *  | P | P | P |
| 0.36766  |    |   |   |    | P | P | P |
| 1.341848 |    |   | * |    | P | P | P |
| 2.189757 |    |   |   | *  | M | P | P |
| 0.307096 |    |   |   |    | P | P | P |
| 0.503153 |    |   |   |    | P | P | M |
| 0.476449 |    |   |   |    | P | P | P |
| 0.744767 |    |   |   |    | P | P | A |
| 2.122696 |    |   |   | *  | P | A | P |

|          |   |    |    |    |   |   |   |   |
|----------|---|----|----|----|---|---|---|---|
| 0.838955 |   | *  |    |    | P | P | A | A |
| 0.899624 | * |    |    |    | P | P | A | A |
| 0.300957 |   |    |    |    | P | P | P | P |
| 0.408665 |   |    |    |    | P | P | P | A |
| 0.087194 |   |    |    |    | P | A | A | A |
| 0.265449 |   |    |    |    | P | P | P | P |
|          |   |    |    |    | M | A | A |   |
| 1.674348 |   |    |    |    | P | M | A | M |
| 1.903568 | * |    |    |    | P | P | P | P |
| 4.259045 |   |    | *  | *  | P | P | P | P |
|          |   |    | *  |    |   |   | A |   |
|          |   | ** |    |    |   | P |   |   |
| 1.208658 |   | ** |    |    | P | P | P | P |
| 20.4183  |   |    | ** | ** | A |   | P | P |
|          |   |    | *  |    |   | A | A |   |
| 2.200393 |   |    |    | *  | P | P | P | P |
| 0.828312 |   |    |    |    | P | P | P | P |
| 2.115103 |   |    |    | *  | P | P | P | P |
| 1.883535 | * |    | *  |    | P |   | P | P |
| 1.218139 |   |    | ** |    | P | P | P | P |
| 1.075846 |   |    |    |    | P | P | P | P |
| 0.915693 |   |    |    |    | P | P | P | P |
| 0.488068 |   |    |    |    | P | P | P | P |
| 0.458762 |   |    |    |    | P | P | P | P |
| 3.0059   |   |    | *  | ** | M |   | P | P |
| 2.112765 |   |    |    | *  | P | P | P | P |
|          |   |    |    |    | A | A | A |   |
| 2.878701 |   |    |    | ** | P | P | P | P |
| 1.660904 |   | *  |    |    | P | P | P | P |
| 2.6813   | * |    | *  | *  | P | A | P | P |
| 1.872288 |   |    | *  |    | P | P | P | P |
| 0.405512 |   |    |    |    | P | P | P | P |
| 6.437839 | * |    | *  | *  | P | P | P | P |
| 0.123247 |   |    |    |    | P | A | A | A |
| 0.766379 | * |    |    |    | P | P | P | P |
| 0.972075 |   |    |    |    | P | P | P | P |
| 0.846921 |   | *  |    |    | P | P | P | P |
|          |   |    | *  |    | P | P | M |   |
|          |   | *  |    |    | P | P |   |   |
|          |   |    | ** |    | P |   | P |   |

|          |    |    |    |    |   |   |   |   |
|----------|----|----|----|----|---|---|---|---|
| 2.472096 |    |    | *  | *  | P | P | P | P |
| 3.709255 |    |    | *  | *  | P | P | P | P |
| 0.461123 |    |    |    |    | P | P | P | P |
| 3.614482 | *  | ** | *  | *  | P | P | P | P |
| 2.059267 |    |    | *  | *  | P | P | P | P |
| 10.14287 |    |    | ** | ** | P | P | P | P |
| 22.82157 | ** |    | *  | ** | P | M | P | P |
| 0.450134 |    |    |    |    | M |   | P | A |
| 0.588507 |    | ** |    |    | P | P | P | A |
| 1.643    | *  |    |    |    | P | P | P | P |
| 0.591336 |    |    |    |    | P | P | P | P |
| 0.334021 |    |    |    |    | P | P | P | P |
| 0.330861 |    |    |    |    | P | P | P | A |
| 6.35781  | *  | *  | *  | *  | P | P | P | P |
| 0.451108 |    |    |    |    | P | P | A | P |
| 2.042106 |    |    | *  | *  | P | P | P | P |
| 0.424162 |    |    |    |    | P | P | P | P |
| 0.781438 |    |    |    |    | P | P | P | P |
| 1.173464 | *  |    | *  |    | P | P | P | P |
|          |    |    |    |    | P | P | P |   |
| 1.881724 |    |    | *  |    | P | P | P | P |
| 5.571632 |    |    |    | *  |   |   |   | M |
| 2.494865 |    |    |    | *  | P | P | P | P |
|          |    |    | *  |    | M | P | M |   |
| 2.010923 |    |    | *  | *  | P | P | P | P |
| 1.473469 |    | *  | *  |    | P | P | P | P |
| 1.562729 |    |    |    |    | A | A | A | P |
| 0.531095 |    |    |    |    | P | P | P | P |
| 12.02678 |    |    | ** | ** | P | P | P | P |
| 1.51963  | *  |    | *  |    | P | P | P | P |
| 0.462105 | *  |    |    |    | P | P | P | A |
|          |    | ** |    |    |   | P |   |   |
| 2.151836 |    | ** | ** | *  | P | P | P | P |
| 0.34944  |    |    |    |    | P | P | P | A |
| 0.011805 |    |    |    |    | P | P | P | A |
| 0.358494 |    |    |    |    | P | P | P | P |
| 0.374842 |    |    |    |    | P | P | P | P |
| 0.463198 |    |    |    |    | P | P | P | P |
| 5.784284 |    |    |    | *  | A |   | P | P |
| 4.90015  |    |    | ** | *  | P | P | P | P |



|          |   |    |    |   |   |   |   |
|----------|---|----|----|---|---|---|---|
| 0.551223 |   |    |    | P | P | P | P |
| 6.323284 |   | *  | *  | M | P | P | P |
| 0.087612 |   |    |    |   | P | A | A |
| 3.256323 |   |    | *  | P | P | P | P |
| 0.460301 |   |    |    | P | P | P | P |
|          |   |    |    |   | A |   |   |
| 0.854429 |   |    |    | P | P | A | P |
| 2.146794 |   |    | *  | P | P | P | P |
| 2.527551 |   | *  | *  | P | P | P | P |
| 0.697203 |   |    |    | P | P | P | P |
| 0.267047 |   |    |    | P | P | P | A |
| 1.747368 |   | *  |    | A | P | P | P |
| 2.561632 |   |    | *  | P | P | P | P |
| 2.970179 | * | *  | ** | P | P | P | P |
| 7.118964 |   |    | ** |   |   | P | P |
|          |   | ** | ** | P | M | P |   |
| 0.362421 |   |    |    | P | P | P | P |
| 2.384509 |   | *  | *  | P | P | P | P |
|          |   |    |    |   | A | A |   |
| 1.710843 |   |    |    | A |   | A | A |
| 1.424454 |   | *  |    | P | P | P | P |
| 0.489974 |   |    |    | P | P | A | A |
|          | * | *  | *  | A | P | P |   |
|          |   |    |    |   | A |   |   |
| 0.667261 | * |    |    | P | A | A | P |
| 0.659508 |   | *  | *  | P | P | P | A |
| 1.284526 |   | ** |    | P | P | P | A |
| 10.97727 | * | *  | ** | P | P | P | P |
|          |   | ** |    |   | M |   |   |
| 6.433516 |   | ** | *  | P | P | P | P |
| 2.506548 |   | ** | *  | P | P | P | P |
| 1.96132  |   | ** |    | P | P | P | P |
| 2.317748 |   | *  | *  | P | P | P | P |
| 4.174403 |   | *  | *  | P | P | P | P |
| 3.876264 |   | ** | *  | P | M | P | P |
| 0.312645 |   |    |    | P | P | P | P |
| 1.438887 |   |    |    | A | P | A | P |
| 17.71348 |   |    | ** |   |   |   | P |
| 1.289096 |   | *  |    | P | P | P | P |
| 1.179275 |   |    |    | A | M |   | A |

|          |    |    |    |    |   |   |   |   |
|----------|----|----|----|----|---|---|---|---|
| 7.827719 |    |    |    | ** |   |   |   | P |
| 1.565468 | *  |    |    |    | P | P | P | P |
|          |    |    |    |    | P | P | A |   |
| 2.886453 |    |    |    | ** | P | P |   | P |
| 2.307621 |    | *  |    | *  | P | P | P | P |
| 1.224845 |    | *  |    |    | P | P | P | P |
| 3.092199 |    |    |    | ** | P |   | P | A |
| 1.702474 |    |    |    |    | P | P | P | P |
| 3.124367 |    | *  |    | ** | P | P | P | P |
| 1.19149  |    |    |    |    | P | P | P | P |
|          |    | *  |    |    | A | A | A |   |
| 8.35336  |    |    | ** | ** | P |   | P | P |
| 2.482116 |    |    |    | *  | P | A | P | P |
| 0.73448  |    |    |    |    | P | A | P | A |
| 59.42147 | ** | *  | ** | ** | P | P | P | P |
| 1.006129 |    |    | *  |    | P | P | P | P |
| 2.732016 |    |    | ** | *  | P | P | P | P |
|          |    |    |    |    | A | P |   |   |
|          |    |    |    |    |   | A | A |   |
| 22.11307 | *  | *  | ** | ** | P | P | P | P |
| 2.435711 |    |    | *  | *  | P | P | P | P |
| 0.574449 |    |    |    |    | P | P | P | P |
| 1.540841 |    | ** |    |    | P | P | P | A |
| 1.722527 |    |    |    |    | P | P | A | A |
|          |    |    |    |    |   |   | A |   |
|          |    |    | *  |    |   | A | M |   |
|          |    |    |    |    |   | A |   |   |
| 0.714141 |    |    |    |    |   | A |   | A |
| 1.510279 | *  |    | *  |    | P | P | P | P |
| 1.184726 |    |    | *  |    | P | P | P | P |
| 3.24799  | ** |    |    | *  | P | M | P | M |
|          |    |    | ** |    |   |   | P |   |
| 1.448113 |    |    |    |    | P | P | P | P |
| 2.601854 |    |    |    | *  | P | P | P | P |
|          |    |    |    |    | A |   |   |   |
| 5.199203 | ** |    |    | *  | M |   |   | P |
| 1.75562  |    |    |    |    | P | P | P | P |
| 1.3942   |    |    | *  |    | P | P | P | P |
|          |    |    |    |    | P | P | A |   |
| 2.318391 | *  |    |    | *  | P | P | A | M |

|          |    |    |   |    |   |   |   |   |
|----------|----|----|---|----|---|---|---|---|
|          |    |    |   |    | P | A | A |   |
| 1.468842 |    |    |   |    | P | P | P | P |
| 0.366021 |    |    |   |    | P | P | P | P |
| 0.672368 |    |    |   |    | P | P |   | A |
| 2.409232 |    |    |   | *  | A |   |   | P |
| 2.353374 |    | *  |   | *  |   |   | A | M |
| 0.476039 |    |    |   |    | P | P | P | P |
| 0.446945 |    |    |   |    | P | P | P | A |
| 1.393504 |    | *  |   |    | P | P | M | P |
| 0.266607 |    |    | * |    | P | A | M | A |
|          |    |    |   |    |   | A |   |   |
|          |    |    |   |    | P | A |   |   |
| 2.564847 | *  |    |   | *  | P | P | A | A |
| 0.829239 |    |    |   |    | P | P | P | P |
| 4.553393 |    | *  |   | *  | P | P | P | P |
| 0.433098 |    |    |   |    | P |   |   | A |
| 2.030031 |    |    |   | *  | P | P | P | P |
| 0.680272 |    |    |   |    | P | P | P | P |
| 1.443911 |    |    | * |    | P | P | P | P |
|          | ** |    |   |    | M | A |   |   |
| 2.376558 |    |    |   | *  |   |   | P | P |
| 1.42415  |    |    |   |    | P | P | P | P |
| 0.795492 |    |    |   |    | P | P | P | P |
| 3.751712 |    | *  |   | *  | P | P | P | P |
| 0.381606 |    |    |   |    | P | P | P | A |
| 0.618957 |    |    |   |    | P | P | P | P |
|          | ** |    |   |    | M |   |   |   |
| 1.015388 |    |    |   |    |   | A |   | A |
| 2.095604 |    | ** |   | *  | P | P | P | P |
| 1.351926 |    |    |   |    | P | A |   | A |
| 2.730613 |    | *  |   | *  | P | P | P | P |
| 2.342266 |    | *  |   | *  | P | P | P | P |
| 1.440726 | *  |    |   |    | P | P | P | P |
| 2.631819 |    | *  |   | *  | P | P | P | P |
| 9.734703 | *  | *  | * | ** | P | P | P | P |
| 11.38283 | *  | *  | * | ** | P | P | P | P |
| 1.245637 | *  |    |   |    | P | P | P | P |
| 0.501775 |    | *  |   |    | P | P | P | P |
|          |    |    |   |    |   | A | A |   |

|          |    |   |    |    |   |   |   |
|----------|----|---|----|----|---|---|---|
| 0.597438 |    |   |    | P  | P | P | P |
| 1.077036 |    |   | ** | A  | P | P | A |
| 2.247996 |    |   |    | *  | P | P | P |
| 4.23932  | *  |   | *  | *  | P | P | P |
| 0.354101 |    |   |    | P  | P | P | P |
| 0.468026 |    |   |    | P  | P | P | P |
| 0.454807 |    |   |    | P  | P | P | P |
| 3.175507 |    |   | *  | ** | P | P | P |
| 3.115816 |    |   | ** | ** | P | P | P |
| 2.436061 |    |   |    | *  | P | P | P |
| 0.246161 |    |   |    |    |   | A | P |
| 3.535075 |    |   |    | *  | P | P | P |
| 2.306333 |    |   | *  | *  | P | P | P |
| 3.460183 | *  | * | *  | *  | P | P | P |
| 2.649191 |    |   |    | *  | P | P | P |
| 1.43685  | ** | * |    |    | P | P | P |
| 3.383354 |    |   | *  | *  | P | P | P |
|          | *  |   |    |    | P |   |   |
| 0.799027 |    |   |    |    | P | P | P |
| 4.150128 | *  |   |    | *  | P | P | P |
| 0.268531 |    |   |    |    | P | P | P |
| 3.084792 |    |   |    | ** | P | P | P |
| 0.51687  |    |   |    |    | P | P | P |
| 0.478368 |    |   |    |    | P | P | P |
| 2.177846 | ** |   |    | *  | P | M | P |
| 3.839393 |    |   |    | *  | M | P |   |
| 0.467031 |    |   |    |    | P | P | P |
| 1.39616  |    |   | ** |    | P | P | P |
| 0.358674 |    |   |    |    | P | P | P |
| 1.005213 |    |   |    |    | P | P | A |
| 2.396151 |    |   |    | *  | P | P | P |
| 0.386949 |    |   |    |    | P | P | P |
| 4.323018 |    |   | *  | *  | P | P | P |
| 1.48334  | *  |   |    |    | P | P | P |
|          | ** |   |    |    | P | P | A |
| 19.20338 | ** | * | ** | ** | P | P | P |
|          |    |   |    |    | M | M |   |
| 1.001552 |    |   |    |    | P | P | P |
| 0.415774 |    |   |    |    | P | P | P |
|          |    |   | ** |    |   | P |   |

|          |    |    |    |   |   |   |   |
|----------|----|----|----|---|---|---|---|
| 0.635821 |    |    |    | P | P | P | P |
| 0.441481 |    |    |    | P | M | A | A |
| 1.25026  |    |    |    | P | P | P | P |
| 2.986605 | *  |    | ** | P | P | P | M |
| 0.349797 |    |    |    | P | P | P | P |
| 0.46543  |    |    |    | P | P | P | P |
| 0.461819 |    |    |    | P | P | P | A |
| 2.433347 |    |    | *  | P | P | P | P |
| 0.498137 |    |    |    | P | P | P | P |
| 2.4217   |    | *  | *  | P | P | P | P |
| 1.357569 |    | *  |    | P | P | P | P |
| 0.516983 |    |    |    | P | P | P | A |
|          |    | ** |    | P | A | P |   |
| 0.405709 |    |    |    | P | P | P | P |
| 3.088703 |    | *  | ** | P | P | P | P |
| 0.498349 |    |    |    | P | P | P | A |
| 0.708452 | *  |    |    | P | P | P | P |
|          | *  |    |    | M |   |   |   |
| 0.429014 |    |    |    | P | P | P | P |
| 0.424615 |    |    |    | P | P | P | P |
| 0.632995 |    |    |    | P | P | P | P |
| 0.313843 |    |    |    | A | P |   | A |
|          |    | *  |    | P | A | P |   |
|          |    |    |    |   | P | A |   |
| 2.003994 |    |    | *  | P | P | P | P |
| 0.446447 |    |    |    | P | P | P | P |
| 4.859605 |    | ** | *  | P | P | P | P |
| 0.646214 | *  | ** |    | P | P | P | P |
| 0.026399 |    |    |    | P | P | A | A |
| 0.520031 |    |    |    | P |   | A | A |
| 1.873784 |    | ** |    | P | P | P | P |
| 1.721383 |    | *  |    | P | P | P | P |
| 1.249023 |    | *  |    | P | P | P | P |
| 2.576502 |    |    | *  | P | P | P | P |
|          | *  |    |    |   | P |   |   |
| 3.638485 |    | *  | *  | P | P | P | P |
|          |    | ** |    | P |   | P |   |
| 8.990442 | ** |    | ** | P | A | P | P |
| 0.267829 |    |    |    | P | P | P | P |
| 1.319654 |    |    |    | A | P | A | A |

|          |    |    |    |    |   |   |   |   |
|----------|----|----|----|----|---|---|---|---|
| 2.73439  |    |    | *  | *  | P | P | P | P |
| 1.852571 |    |    | *  |    | P | P | P | P |
| 1.866146 |    |    | ** |    | P | P | P | P |
| 5.703775 |    |    |    | *  |   |   |   | P |
| 3.847492 |    |    | *  | *  | M | P | P | P |
| 1.486361 |    |    |    |    | P | P | P | P |
|          | *  |    | *  |    | P |   | P |   |
|          |    |    | ** |    |   | P | P |   |
| 2.258718 |    |    |    | *  | P | P | P | P |
| 0.519484 |    |    |    |    | P | P | P | A |
| 2.397136 |    | *  |    | *  | P | P | P | P |
| 2.290618 |    |    |    | *  | A | P | P | P |
| 0.486821 |    |    |    |    | P | P | P | P |
| 2.231683 |    |    |    | *  | P | P | P | P |
| 2.356502 |    |    | ** | *  | P | P | P | P |
| 1.179592 |    |    | *  |    | P | P | P | P |
| 2.687623 |    |    |    | *  | A | P | P | P |
|          | *  |    |    |    | P | P | A |   |
| 0.441611 |    |    |    |    | P | P | P | A |
| 1.795797 |    |    | *  |    | P | P | P | P |
| 0.699078 | ** |    |    |    | P | P | A | A |
|          |    |    | *  |    | M | P | P |   |
| 2.644793 | *  |    | *  | *  | P | P | P | P |
| 0.851792 | *  |    |    |    | P | P | P | A |
| 2.991972 |    |    |    | ** | P | P | P | P |
| 2.039484 |    |    | ** | *  | P | P | P | P |
|          |    |    |    |    |   | A |   |   |
| 285.1229 | ** | ** | ** | ** | P | P | P | P |
| 2.113661 |    |    |    | *  | P | P | P | P |
| 6.305899 | *  |    | *  | *  | P | P | P | P |
| 0.684481 | ** |    |    |    | P | P | A | P |
| 2.093664 |    |    |    | *  |   |   |   | P |
| 0.274669 |    |    |    |    | P | A | A | A |
| 0.622079 |    |    |    |    | P | P | P | P |
| 0.646866 |    |    |    |    | P | P | P | P |
|          |    |    |    |    |   | P | A |   |
|          |    |    |    |    | M | P | A |   |
| 1.694634 |    | *  | *  |    | P | P | P | P |
| 2.34331  |    |    |    | *  | P | P |   | M |
| 0.254857 |    |    |    |    | P | P | P | P |

|          |   |    |    |    |   |   |   |   |
|----------|---|----|----|----|---|---|---|---|
| 0.325256 |   |    |    |    | P | P | P | P |
| 16.07059 |   |    | ** | ** | P | A | P | M |
| 0.641962 |   |    |    |    | P | P | P | P |
| 0.313611 |   |    |    |    | P | P | P | P |
| 0.189382 |   |    |    |    | P | P | P | P |
| 0.706539 | * |    |    |    | P | P | P | P |
| 0.457622 |   |    |    |    | P | P | P | A |
|          |   | *  |    |    | A | M |   |   |
| 0.706606 |   |    |    |    | P | P | P | P |
| 2.107444 |   |    |    | *  | P | P | P | P |
| 2.429877 |   |    | *  | *  | P | P | P | P |
| 0.920028 | * | ** | ** |    | P | P | M | A |
| 0.896328 |   |    |    |    | P | P | P | P |
| 0.285286 |   |    |    |    | P | P | P | P |
| 1.55479  |   |    |    |    | P | P | P | M |
| 2.84218  |   |    |    | ** | P | P | P | P |
| 1.500079 |   |    | *  |    | P | P | P | P |
| 2.594648 |   |    |    | *  | P | P | P | P |
| 1.835659 | * |    | *  |    | P | P | P | P |
| 19.76108 |   |    | *  | ** |   |   | M | P |
| 4.716631 | * |    | *  | *  | P | P | P | P |
| 2.868372 |   |    | ** | ** | P | P | P | P |
| 2.549211 |   |    | ** | *  | P | P | P | P |
| 5.455999 |   | *  |    | *  | P | P | P | P |
| 0.784686 |   |    |    |    | P | P | P | P |
|          |   |    | *  |    |   |   | P |   |
| 2.719335 |   |    | ** | *  | P | P | P | P |
| 2.971283 | * | *  |    | ** | P | P | P | P |
| 1.096743 |   | *  |    |    | P | P | P | M |
| 2.123547 |   |    |    | *  | P | P | P | P |
| 0.238717 |   |    |    |    | P | P | P | P |
|          |   |    |    |    |   | M | A |   |
| 0.253957 |   |    |    |    | P | P | P | P |
| 2.876619 |   |    |    | ** | P | P | P | P |
| 0.768064 |   |    |    |    | P | P | A | P |
| 2.809971 |   |    |    | *  | P | P | P | P |
| 2.491679 |   |    |    | *  | P | P | P | P |
|          |   |    | *  |    | P | A | P |   |
| 2.269978 |   |    |    | *  | P | P | P | P |
| 0.510112 |   |    |    |    | P | P | P | P |

|          |    |    |    |    |   |   |   |   |
|----------|----|----|----|----|---|---|---|---|
| 2.27502  |    |    | *  | *  | P | P | P | P |
| 3.173528 | *  |    |    | ** | P | A | P | P |
| 0.481314 |    |    |    |    | P | P | A | A |
| 0.428243 |    |    |    |    | P | P | P | P |
| 1.033852 | *  |    | *  |    | P | P | P | P |
| 0.366964 |    |    |    |    | P | P | P | P |
| 0.260103 |    |    |    |    | P | P | A | A |
| 2.751192 |    |    | *  | *  | P | P | P | P |
| 0.961903 |    |    | *  |    | P | P | P | P |
| 0.528875 | *  |    |    |    | P | P | A | A |
| 0.120812 |    |    |    |    |   |   |   | A |
| 2.692791 |    |    | *  | *  | P | P | P | P |
| 2.73841  |    |    | *  | *  |   | P | P | P |
| 0.419678 |    |    |    |    | P | P | P | P |
| 3.164122 |    |    |    | ** | P | P | P | P |
| 1.111628 | *  |    |    |    | P | P | P | P |
| 0.317517 |    |    |    |    | P | P | P | P |
| 2.866915 |    |    |    | ** | P | P | P | P |
| 1.203387 |    |    | ** |    | P | A | P | A |
| 2.045456 |    |    |    | *  | P | P | P | P |
| 1.009653 |    |    | ** |    | A |   | P | A |
|          |    |    |    |    |   |   | A |   |
| 0.281249 |    |    |    |    | P | P | P | P |
| 2.068281 |    | *  |    | *  | P | M |   | M |
| 1.720063 |    |    | *  |    | P | P | P | P |
| 1.851123 |    |    | *  |    | P | P | P | P |
| 2.504985 |    |    |    | *  | P | P | P | P |
| 1.065139 | *  |    |    |    | P | P | P | P |
| 1.134514 |    | ** | ** |    | P | P | P | A |
| 0.447046 |    |    |    |    | P |   | P | A |
| 3.868405 | *  |    |    | *  | P | P | P | P |
| 2.760531 | ** |    | *  | *  | P | P | P | P |
| 0.668513 |    |    |    |    | P | P | P | P |
| 0.371143 |    |    |    |    | P | P | P | P |
| 1.6193   |    |    |    |    | P | P | P | P |
| 0.304481 |    |    |    |    | P | P | P | P |
| 4.566288 | *  |    | *  | *  | P | P | P | P |
| 2.515447 | *  | *  | *  | *  | P | P | P | P |
|          |    | ** |    |    |   | P |   |   |
| 0.916544 |    |    |    |    | M | P | A | P |



|          |    |    |    |   |   |   |   |
|----------|----|----|----|---|---|---|---|
| 3.353252 |    |    | *  | P | P | P | P |
| 0.993395 |    |    |    | P | P | P | P |
| 1.942525 |    |    |    | P | P | P | P |
| 2.158071 |    |    | *  | P | P | P | P |
| 0.461043 | ** | *  |    | P | P | P | P |
| 2.803553 |    |    | *  |   | M |   | P |
| 0.418883 |    |    |    | P | M | P | P |
| 1.177273 |    | *  |    | P | P | P | P |
| 0.411897 |    |    |    | P | P | P | P |
| 2.072667 |    |    | ** | P | P | P | P |
| 0.404208 |    |    |    | P | P | P | P |
|          |    |    |    | A | A |   |   |
| 0.560854 |    |    |    | A | P | P | A |
| 1.338461 |    | *  |    | P | P | P | P |
| 0.466567 |    |    |    | P | P | P | P |
| 2.765494 | *  | ** | *  | P | P | P | P |
|          |    |    |    | P | P | A |   |
| 2.062472 |    | *  | *  | P | P | P | M |
| 1.110034 | *  |    |    | P | P | P | P |
| 1.221283 |    |    |    | P | A | A | P |
| 0.919143 |    | *  |    | P | P | P | P |
| 0.680461 |    |    |    | P | P | A | A |
| 0.453351 |    |    |    | P | P | P | P |
|          |    |    |    | P | A |   |   |
| 0.896828 |    | *  |    | A | M | P | A |
| 4.159748 |    |    | *  | P | P | P | P |
| 1.190571 |    | *  |    | P | P | P | P |
| 1.066799 |    |    |    | P | P | A | M |
| 0.468873 |    |    |    | P | P | P | P |
| 0.270997 |    |    |    | P | P | P | P |
| 1.619254 |    | *  |    | P | P | P | P |
|          | *  | *  |    | P | P | P |   |
| 1.027768 |    |    |    | P | P | P | P |
| 1.971297 | *  |    |    | P | A | P | P |
| 0.148995 |    |    |    |   |   | A | A |
| 2.077138 |    |    | *  | P | P | A | P |
| 1.487398 |    |    |    | P | A | P | P |
| 2.520709 |    |    | *  | P | P | P | P |
| 2.553301 |    |    | *  | P | P | M | P |
| 3.461235 |    |    | *  | P | P | P | P |

|          |    |    |    |    |   |   |   |   |
|----------|----|----|----|----|---|---|---|---|
| 7.938298 | *  | *  | ** | ** | P | P | P | P |
| 1.131001 |    |    |    |    | M | A | A | M |
| 1.000504 |    |    |    |    | P | P | A | P |
| 0.44416  |    |    |    |    | P | P | P | P |
| 5.636228 |    |    | ** | *  | P | P | P | P |
| 6.548929 |    |    | ** | ** | P | P | P | P |
| 0.721559 |    |    |    |    | P | P | P | A |
| 0.45872  |    |    |    |    | P | P | P | P |
| 1.013603 |    |    |    |    | P | P | P | A |
| 2.29819  |    |    |    | *  | P | P | P | P |
| 1.558517 | ** |    | *  |    | P | P | P | P |
| 3.769421 |    |    | ** | *  | P | P | P | P |
| 0.472557 |    |    |    |    | P | P | P | P |
| 6.055239 | *  |    | *  | *  | P | P | P | P |
|          |    |    |    |    | A | P | A |   |
| 0.442156 |    |    |    |    | P | P | P | P |
| 3.913626 |    |    | *  | *  | P | P | P | P |
|          |    |    |    |    | P | P | A |   |
|          |    | *  |    |    | P | P | P |   |
| 3.042263 |    |    | *  | ** | P | P | P | P |
| 85.64077 |    | ** | ** | ** | P | P | P | P |
| 0.186042 |    |    |    |    | P | P | P | A |
| 0.595685 |    |    |    |    | P | P | A | P |
|          |    |    | *  |    |   | P | P |   |
| 3.571449 |    |    | *  | *  | P | P | P | P |
| 0.57532  |    |    |    |    | P | P | P | P |
| 0.815984 |    |    | *  |    | P | P | P | P |
| 2.835863 |    |    |    | *  | P | P | P | P |
| 0.349478 |    |    |    |    | P | P | P | P |
| 0.74708  |    |    |    |    | P | P | P | M |
| 2.804147 |    |    | *  | *  | P | P | P | P |
| 0.863168 | *  |    |    |    | P | P | P | M |
| 0.546385 |    |    |    |    | P | P | P | P |
| 0.511726 |    |    |    |    | P | P | P | P |
| 0.111141 |    |    |    |    | P | P | P | A |
|          |    |    |    |    | P | A |   |   |
| 0.565195 |    |    |    |    | P | P | P | P |
| 3.689746 |    |    |    | *  | A | P | P | P |
| 2.245828 | *  |    |    | *  | P | P | P | P |
| 1.782377 |    | *  | *  |    | P | P | P | P |

|          |   |   |    |    |   |   |   |   |
|----------|---|---|----|----|---|---|---|---|
|          |   |   |    |    | P | P | A |   |
|          | * |   |    |    | P | P | P |   |
|          |   | * |    |    |   | P | A |   |
| 0.324741 |   |   |    |    | P | P | P | P |
| 2.157158 | * |   | *  | *  | P | P | P | P |
| 0.384239 |   |   |    |    | P | P | P | A |
| 1.222599 | * | * |    |    | P | P | P | P |
| 3.994254 |   |   | ** | *  | P | P | P | P |
| 5.080347 |   |   | *  | *  | A | P | P | P |
| 0.373003 |   |   | ** |    | A | A | P | A |
| 0.665744 | * |   |    |    | P | P | P | P |
| 0.376213 |   |   |    |    | P | P | P | P |
| 3.934319 |   |   | *  | *  | P | P | P | P |
|          |   |   |    |    |   | A |   |   |
| 2.010741 |   |   |    | *  | P | P | P | P |
| 1.583033 |   |   | ** |    | P | P | P | P |
| 2.39404  |   |   |    | *  | P | P | P | P |
| 0.920812 | * |   |    |    | P | P | P | P |
|          |   |   |    |    |   | A |   |   |
| 0.540129 |   |   |    |    | P | P | P | P |
| 2.018959 |   |   |    | *  | P | P | P | P |
|          |   |   | *  |    | P |   | P |   |
| 3.308762 |   |   |    | *  | P | P | P | P |
|          |   |   |    |    | P | P | A |   |
| 0.426992 |   |   |    |    | P | P | P | P |
| 0.122606 |   |   |    |    | P | P | A | A |
| 0.445548 |   |   |    |    | P | P | P | P |
| 0.426158 |   |   |    |    | P | P | P | P |
| 0.864993 |   |   |    |    | P | P | P | P |
| 1.576027 |   | * |    |    | P | P | A | P |
| 0.247139 |   |   |    |    | P | P | P | A |
| 0.596516 |   |   |    |    | P | P | P | P |
| 1.440687 |   |   |    |    | P | P | P | P |
| 0.72072  |   |   |    |    | P | P | P | P |
| 30.51464 |   |   |    | ** |   |   |   | P |
| 2.095345 |   |   |    | *  | P | P | P | P |
| 0.461138 |   |   |    |    | P | P | P | P |
| 2.302434 |   |   | *  | *  | P | P | P | P |
| 3.163953 | * |   |    | ** | P | P | P | P |
|          |   | * |    |    | P | P | P |   |

|          |    |    |    |    |   |   |   |
|----------|----|----|----|----|---|---|---|
|          |    |    |    | P  | A |   |   |
| 1.03969  | *  |    | *  | P  | P | P | P |
| 0.226185 |    |    |    | P  | P | P | P |
| 2.673043 |    |    | *  | *  | P | P | P |
| 0.451667 |    |    |    |    | P | P | P |
| 15.42815 |    |    |    | ** | P | A | P |
| 2.057611 |    |    | *  | *  | P | P | P |
| 1.847976 |    |    | *  |    | P | P | P |
|          |    |    |    |    |   | A |   |
| 1.676808 |    |    | ** |    | P | P | P |
| 0.429348 |    |    |    |    | P | P | A |
| 0.463807 |    |    |    |    | P | P | P |
| 2.724597 |    |    |    | *  | P | P | P |
|          |    |    |    |    | P |   |   |
|          |    |    |    |    | P | A |   |
| 0.784364 |    |    |    |    | P | P | A |
| 7.960342 |    |    |    | ** |   |   | P |
| 1.124229 | *  |    |    |    | P | P | P |
| 4.507622 | ** |    | ** | *  | P | P | P |
| 1.437651 |    |    | *  |    | P | P | P |
| 0.355248 |    |    |    |    | P | P | P |
| 2.268408 |    |    |    | *  | P | A | P |
|          |    |    | ** |    | P | P | P |
| 2.253842 |    |    |    | *  | P | P | P |
| 1.754251 |    |    | *  |    | P | P | P |
|          |    | ** |    |    | P | P |   |
| 2.963112 |    | *  | ** | ** | P | P | P |
| 1.236898 | ** |    |    |    | P | P | P |
| 1.932217 |    | ** |    |    | P | P | A |
|          |    |    |    |    |   | A |   |
| 2.125953 |    |    |    | *  | P | P | P |
| 2.301995 |    |    |    | *  | P | P | P |
| 2.658715 |    |    |    | *  | P | P | P |
| 4.740365 |    |    |    | *  |   |   | P |
| 1.730481 |    | *  |    |    | P | P | P |
| 0.775411 |    |    |    |    | P | P | P |
| 0.344847 |    |    |    |    | P | P | A |
| 1.45416  |    |    |    |    | P | P | P |
| 2.977843 |    | ** |    | ** | P | P | M |
| 7.825981 |    |    | *  | ** |   | P | P |

|          |    |    |    |    |   |   |   |   |
|----------|----|----|----|----|---|---|---|---|
| 2.087028 |    |    |    | *  | P | A | A | P |
|          |    |    |    |    | P | P | P |   |
| 0.883798 | *  |    |    |    | P | P | P | P |
| 0.635429 | ** |    |    |    | P | P | A | A |
| 1.665601 |    | *  |    |    | P | M | P | P |
| 5.826672 | *  |    | ** | *  | P | P | P | P |
| 3.947858 |    |    | *  | *  | P | P | P | P |
| 0.474586 |    |    |    |    | P | P | P | P |
| 2.252544 |    |    |    | *  | P | P | P | P |
| 0.851938 |    |    |    |    | P | A |   | P |
| 0.486382 |    |    |    |    | P | P | P | P |
| 2.69948  |    |    | *  | *  | P | P | P | P |
| 0.124518 |    |    |    |    |   | A |   | A |
| 0.509859 |    |    |    |    | P | P | P | P |
| 2.027245 | ** | *  | *  | *  | P | P | P | P |
|          |    |    |    |    |   | A |   |   |
| 1.185368 |    |    | *  |    | P | P | P | P |
| 2.244637 |    |    |    | *  | P | P | A | P |
| 0.519006 |    |    |    |    | P | P | P | P |
| 1.244181 |    |    | *  |    | P | P | P | P |
| 14.92523 | ** | *  | ** | ** | P | P | P | P |
| 3.122494 |    |    | *  | ** | P | P | P | P |
| 2.39285  |    |    | *  | *  | P | P | P | P |
| 0.918473 | ** |    |    |    | P | P | P | P |
| 1.880688 |    | *  |    |    | P | P | P | P |
| 0.417578 |    |    |    |    | P | P | P | P |
| 4.192529 | *  |    | ** | *  | P | P | P | P |
| 1.388603 |    |    | ** |    | P | P | P | P |
| 4.171489 | ** | ** | ** | *  | P | P | P | P |
| 0.408504 |    |    |    |    | P | P | P | A |
|          | *  | *  |    |    | P | P | P |   |
| 7.187136 | *  | *  | ** | ** | P | P | P | P |
| 3.463314 |    |    | ** | *  | P | P | P | P |
| 0.276642 |    |    |    |    | P | P | P | P |
| 0.568297 |    |    |    |    | P | P | P | P |
| 0.931694 |    |    |    |    | P | P | P | P |
| 0.454916 |    |    |    |    | P | P | P | P |
| 0.117791 |    |    |    |    | P | P | A | A |
| 0.378166 |    |    |    |    | P | P | P | A |

|          |    |    |    |    |   |   |   |   |
|----------|----|----|----|----|---|---|---|---|
| 2.318672 |    | ** | ** | *  | P | P | P | P |
| 0.383445 |    |    |    |    | P | P | P | A |
|          |    |    |    |    | P | P | A |   |
| 3.116161 |    | *  | ** | ** | P | P | P | P |
| 1.600987 |    |    | ** |    | P | P | P | P |
|          |    | *  | *  |    | P | P | P |   |
| 3.092816 | ** |    |    | ** | M | A |   | M |
| 1.744317 |    |    | ** |    | A | P | P | A |
| 0.330459 |    |    |    |    | P | P | P | M |
| 0.980659 |    |    |    |    | P | P | P | A |
| 0.30376  |    |    |    |    | P | P | P | P |
| 1.591929 |    | *  | ** |    | P | P | P | P |
| 1.016979 |    |    |    |    | P | P | P | P |
| 2.018605 |    |    |    | *  | P | P | P | P |
| 0.810987 |    |    | *  |    | P | P | P | P |
| 7.034816 |    | *  | ** | ** | P | P | P | P |
| 1.945648 |    |    | *  |    | P | P | P | P |
| 2.176422 |    |    | ** | *  | P | P | P | P |
| 2.583747 |    |    |    | *  | P | P | A | A |
| 3.903323 |    |    | *  | *  | P | P | P | P |
| 1.530755 |    |    | ** |    | P | P | P | P |
| 1.620733 |    |    | *  |    | P | P | P | P |
| 1.946137 |    |    | *  |    | P | P | P | P |
| 6.764693 |    |    | *  | ** | P | A | P | P |
| 7.994959 |    |    | ** | ** | P | P | P | P |
| 2.807187 |    |    | ** | *  |   |   | P | P |
| 1.275599 |    |    |    |    | P | P | P | P |
| 0.562044 |    |    |    |    | P | P | P | P |
| 0.410615 |    |    |    |    | P | P | P | P |
|          |    |    |    |    | A |   |   |   |
| 1.765242 |    |    | *  |    | P | P | P | P |
|          | *  |    |    |    | P | P | P |   |
|          |    |    |    |    | P |   | A |   |
|          |    |    | *  |    |   |   | A |   |
| 2.585879 |    |    |    | *  | P | P | A | P |
| 1.294103 |    |    | *  |    | P | P | P | P |
| 1.119118 |    |    |    |    | P | P | P | P |
|          |    |    |    |    | A |   |   |   |
| 0.868009 |    |    |    |    | P | P | P | A |
|          |    |    |    |    |   | A |   |   |

|          |    |    |    |   |   |   |   |
|----------|----|----|----|---|---|---|---|
| 2.106084 |    |    | *  | P | P | P | P |
| 1.458593 |    | *  |    | P | P | P | P |
|          |    |    |    | A | A | A |   |
| 0.782438 |    |    |    | P | P | A | P |
| 2.361405 |    |    | *  |   | A |   | P |
| 2.62555  |    |    | *  | P | P | P | P |
| 0.890584 | *  | *  |    | P | P | P | P |
| 0.740307 |    |    |    | P | P | P | P |
|          |    |    |    | A | A |   |   |
| 2.381559 |    |    | *  |   |   |   | P |
| 1.687504 |    | *  |    | P | P | A | P |
| 0.595064 |    |    |    | P | A | A | A |
| 1.241447 |    | ** |    | P | P | A | A |
| 0.961359 |    | *  |    | P | P | P | P |
| 1.39965  | ** |    |    | P | P | P | P |
| 2.223146 |    |    | *  | P | P | P | P |
| 0.462808 |    |    |    | P | P | A | A |
| 0.093491 |    |    |    |   |   |   | A |
|          |    |    |    | A | A |   |   |
| 0.734759 |    |    |    | P | P | P | M |
| 2.982525 |    | ** | ** | P |   | P | P |
| 6.125956 |    | *  | ** | P | P | P | P |
| 0.513518 |    |    |    | P | P | P | A |
| 0.308779 |    |    |    | P | P | P | P |
| 0.567771 | ** |    |    | P | P | P | P |
| 0.698353 |    |    |    | P | P | P | P |
| 0.343034 |    |    |    | P | P | P | P |
| 0.558181 | *  |    |    | P | P | P | P |
| 0.538288 |    |    |    | P | P | P | P |
| 0.403108 |    |    |    | P | P | P | P |
| 1.362814 |    | ** |    | P | P | P | P |
| 1.969085 |    |    |    | P | P | P | P |
| 2.317283 |    |    | *  | P | P | P | P |
|          |    |    |    |   | A |   |   |
| 2.208519 | ** |    | *  | P | A | P | P |
|          | ** |    |    | P | P |   |   |
| 0.923499 |    | *  |    | P | P | P | P |
| 0.590789 |    |    |    | P | P | P | A |
| 0.505723 |    |    |    | P | P | P | P |
| 0.236422 |    |    |    | P | P | P | P |

|          |    |    |    |    |   |   |   |   |
|----------|----|----|----|----|---|---|---|---|
| 0.207362 |    |    |    |    | P | P | P | P |
| 2.340105 |    |    | *  | *  | P | P | P | P |
| 24.80621 |    | ** | *  | ** |   | P | P | P |
|          | *  |    |    |    | P | P | P |   |
|          |    |    | *  |    | A | A | P |   |
| 0.424032 |    | *  |    |    | P | P | A | A |
| 1.119041 |    |    |    |    | P | M | P | P |
| 2.125545 |    |    |    | *  | P | P | P | A |
| 5.63506  |    |    | *  | *  | P | P | P | P |
| 0.809878 |    |    |    |    | P | P | P | A |
| 0.487929 |    |    |    |    | P | P | P | P |
| 1.854277 |    | *  |    |    |   | P | P | P |
| 1.356162 |    |    |    |    | P | P | P | P |
|          |    |    | *  |    | A | P | M |   |
| 2.593708 |    |    | *  | *  | P | P | P | P |
| 0.68584  |    |    |    |    | P | P | P | P |
| 0.775079 |    |    | ** |    | P | P | P | P |
| 1.022162 | *  |    |    |    | P | P | P | A |
| 3.323741 |    |    |    | *  | P |   |   | P |
| 5.657239 |    |    | ** | *  | P |   | P | M |
| 0.309017 |    | *  |    |    | P | P | P | A |
| 0.467832 |    |    |    |    | P | P | P | P |
| 0.339279 |    |    |    |    | P | P | P | P |
| 0.460261 |    |    |    |    | P | P | P | P |
| 1.91238  |    |    | *  |    | P | P | P | P |
| 1.285361 |    |    | ** |    | P | P | P | P |
| 3.538998 |    |    | *  | *  | P | P | P | P |
| 4.514599 |    |    |    | *  | P | P | P | P |
| 2.107838 |    |    |    | *  | P | P | P | P |
| 3.020982 |    |    | ** | ** | P | P | P | P |
| 2.620413 |    |    |    | *  | P | P | P | P |
| 1.847373 |    |    | *  |    | P | A | P | P |
| 0.476977 |    |    |    |    | P | P | P | P |
| 5.637981 |    |    |    | *  | P | P | P | P |
| 0.568119 |    |    |    |    | P | P | P | P |
|          | *  |    | *  |    | P | M | P |   |
| 2.873809 |    |    |    | ** | P |   |   | P |
| 3.03915  |    |    |    | ** | P | P | P | P |
| 2.768451 |    |    | *  | *  | P | P | P | P |
| 0.786161 | ** |    |    |    | P | P | P | P |



|          |    |    |    |    |   |   |   |   |
|----------|----|----|----|----|---|---|---|---|
| 0.244747 |    |    |    |    | P | P | P | P |
| 2.479005 |    |    |    | *  | P | P | P | P |
| 0.159436 |    |    |    |    | P | P | P | A |
| 0.998429 |    |    |    |    | P | P | P | P |
| 0.613033 | *  |    |    |    | P | P | P | P |
| 2.079755 |    |    |    | *  | P | P | P | P |
| 1.026863 |    |    |    |    | P | P | A | A |
| 1.051558 |    |    |    |    | P | P | P | P |
| 1.40432  |    |    |    |    | P | P | A | P |
| 0.44158  |    |    |    |    | P | P | P | P |
| 3.623189 |    |    | *  | *  | P | P | P | P |
|          |    | ** |    |    | A | M | A |   |
| 2.856679 |    |    |    | ** | P | P | P | P |
| 1.161159 | *  |    |    |    | P | P | P | P |
| 2.068545 |    |    | *  | ** | P | P | P | P |
| 0.026406 |    |    |    |    | P | P | P | A |
| 0.324932 |    |    |    |    | P | P | P | P |
| 0.3121   |    |    |    |    | P | P | P | P |
| 2.002504 |    |    | *  | *  | P | P | P | P |
| 0.53648  |    |    |    |    | P | P | A | P |
| 0.615608 | *  |    |    |    | P | P | P | P |
| 0.467085 |    |    |    |    | P | P | P | P |
| 0.814056 | ** | *  | *  |    | P | P | P | P |
| 1.160271 |    | ** |    |    | P | P | P | P |
| 6.699477 |    |    |    | ** | A | P | P | M |
| 0.087957 |    |    |    |    | P | P | P | P |
| 1.887703 |    |    | *  |    | P | P | P | P |
|          |    | ** |    |    |   | M |   |   |
| 0.476925 |    |    |    |    | P | P | P | P |
|          |    |    | *  |    | P | P | P |   |
| 2.018536 |    |    | ** | *  | P | P | P | P |
| 1.510203 | *  |    | ** |    | P | M | P | M |
| 0.398768 |    |    |    |    |   |   |   | A |
|          |    | ** |    |    |   | M |   |   |
| 3.220911 |    |    |    | ** | P | P | P | P |
| 0.308027 |    |    |    |    | P | P | P | A |
| 2.028215 |    |    |    | *  | P | P | P | M |
| 0.554638 |    | *  |    |    | P | P | M | A |
| 0.777266 |    |    |    |    | P | P | P | P |
| 1.998724 |    |    | *  |    | P | P | P | P |

|          |    |   |    |   |   |   |   |   |
|----------|----|---|----|---|---|---|---|---|
| 0.858758 |    |   |    |   | P |   | P | P |
| 1.768557 | *  |   | ** |   | P | P | P | P |
| 0.186959 |    |   |    |   | P | P | M | A |
| 1.01177  |    |   |    |   | P | P |   | M |
| 3.818489 | ** |   | *  | * | P | P | P | P |
|          |    |   |    |   |   | P |   |   |
| 1.060452 |    |   |    |   | P | P | P | A |
| 2.124427 |    |   | *  | * | P | P | P | P |
| 3.407102 |    |   | *  | * | P | P | P | P |
| 3.465755 |    |   |    | * | P | M | P | P |
| 3.347384 |    |   |    | * | P | P | P | P |
| 0.775604 |    |   | ** |   | P | P | P | P |
| 0.582324 |    | * | *  |   | P | P | P | P |
| 1.361113 |    |   | *  |   | P | P | P | P |
| 0.455417 |    |   |    |   | P | P | P | P |
| 3.266535 |    | * | *  | * | P | P | P | P |
| 0.132952 |    |   |    |   | P | P | A | A |
| 0.661419 |    |   |    |   | P | P | P | A |
| 2.545368 | *  | * | ** | * | P | P | P | P |
| 1.136973 |    |   | ** |   | P | P | P | P |
| 1.608193 | *  |   | *  |   | P | P | P | P |
| 0.834032 |    | * |    |   | P | P | P | P |
|          |    |   |    |   | A |   |   |   |
| 0.501999 |    |   |    |   | P | P | P | P |
| 0.383022 |    |   |    |   | P | P | P | P |
| 2.084985 |    |   | *  | * | P | P | P | P |
| 0.946514 | *  |   |    |   | P | P | P | P |
| 0.764849 |    |   |    |   | P | P | P | P |
| 0.892081 |    |   |    |   | P | P | P | P |
| 2.307505 | *  | * | *  | * | P | P | P | P |
| 2.294241 |    |   | ** | * | P | A | P | P |
| 0.630386 |    |   |    |   | P | P | P | A |
| 0.393817 |    |   |    |   | P | P | P | P |
| 0.451209 |    |   |    |   | P | P | P | P |
| 2.040625 |    |   |    | * | P | P | P | P |
| 0.694858 | *  |   |    |   | P | P | P | P |
| 0.405344 |    |   |    |   | P | P | P | P |
| 0.868545 |    |   |    |   | P | P | P | A |
| 4.079346 |    |   | *  | * | P | P | P | P |
| 2.036809 |    |   |    | * | P | P | P | P |

|          |    |    |    |    |   |   |   |   |
|----------|----|----|----|----|---|---|---|---|
| 1.849606 | *  | *  | *  |    | P | P | P | P |
| 2.014641 |    |    |    | *  | P | P | A | P |
| 4.392857 |    | ** |    | *  | P | P | P | P |
| 0.252732 | *  |    |    |    | P | P | P | P |
| 0.46072  |    |    |    |    | P | P | P | P |
| 0.201604 |    |    |    |    | A | A |   | A |
| 0.209919 |    |    |    |    | P | A | P | A |
| 4.162782 |    | *  | *  | *  | A | P | P | M |
| 4.398699 |    |    | *  | *  | P | P | M | P |
| 4.118503 |    |    |    | *  |   |   |   | P |
| 0.687412 | *  |    |    |    | P | P |   | A |
| 3.528062 | ** | *  | ** | *  | P | P | P | P |
| 4.08222  |    |    | ** | *  | P | A | P | P |
| 3.156698 |    |    |    | ** | P | P |   | P |
|          |    |    |    |    |   | A |   |   |
| 8.646903 | ** | ** | ** | ** | P | P | P | P |
| 1.182855 |    | *  |    |    | P | P | P | P |
| 1.477875 |    |    | *  |    | P | P | P | P |
| 1.439467 | *  | ** |    |    | P | P | P | P |
| 2.00403  |    |    | ** | *  | P | P | P | P |
| 1.377711 |    |    |    |    | A | A |   | A |
| 3.706979 |    |    | ** | *  | P | P | P | P |
| 3.597495 |    |    |    | *  |   | A | P | P |
| 2.273676 |    |    | *  | *  | P | P | P | P |
| 2.189633 |    |    | *  | *  | P | P | P | P |
| 0.773648 |    |    |    |    | P | P | P | A |
| 0.39457  |    |    |    |    | P | P | P | P |
| 0.847209 |    |    |    |    | P | P | P | P |
| 0.812335 | *  |    |    |    | P | P | P | P |
| 4.887964 | *  | *  | ** | *  | P | P | P | P |
| 0.904418 |    |    |    |    | P | P | P | P |
| 0.415067 |    |    |    |    | P | P | P | P |
| 0.406878 |    |    |    |    | P | P | P | P |
|          |    | *  |    |    |   | P |   |   |
|          |    |    | ** |    |   |   | M |   |
|          |    |    |    |    |   | P | A |   |
|          | ** |    |    |    | P |   | A |   |
| 11.70856 | ** |    | ** | ** | P |   | P | P |

|          |   |    |    |    |   |   |   |   |
|----------|---|----|----|----|---|---|---|---|
| 3.047814 |   |    |    | ** |   |   |   | A |
| 0.406908 |   |    |    |    | P | P | P | P |
| 7.590356 |   | *  |    | ** | P | P | P | P |
| 2.261627 |   |    |    | *  | P | P | P | P |
| 0.975909 |   | *  |    |    | P | P | P | P |
|          | * |    |    |    | P | A | A |   |
| 0.377005 |   |    |    |    | P | P | P | P |
| 2.166594 |   | *  | ** | *  | P | P | P | P |
| 0.900583 | * |    |    |    | P | P | P | P |
| 2.034926 |   |    |    | *  | P | P | P | P |
| 0.792619 |   |    |    |    | P | P | P | P |
| 0.425109 |   |    |    |    | P | P | P | P |
| 1.563405 |   |    |    |    | P | P | P | P |
| 0.440393 |   |    |    |    | P | P | P | P |
| 0.472069 | * |    |    |    | P | P |   | A |
| 7.497996 |   | ** | ** | ** | P | P | P | P |
| 8.428905 |   |    |    | ** | P | P | P | P |
|          | * |    |    |    | P |   |   |   |
| 0.549245 |   |    | *  |    | P | P | P | P |
| 0.482327 |   |    |    |    | P | P | P | A |
| 1.520834 |   |    | *  |    | P | P | P | P |
| 0.397635 |   |    |    |    | P | P | P | P |
| 1.038392 | * |    | *  |    | P | P | P | P |
| 5.935432 |   | *  | ** | *  | P | P | P | P |
|          |   |    |    |    | A | M | A |   |
| 1.359206 |   |    | ** |    | P | P | P | P |
| 0.522462 |   |    |    |    | P | P | P | P |
| 0.286885 |   |    |    |    | P | P | A | P |
| 0.133597 |   |    |    |    | P | P | M | A |
| 0.353495 |   |    |    |    | M | P | A | A |
| 1.375766 | * |    |    |    | P | P | P | P |
| 1.409303 |   |    |    |    | P | P | P | P |
| 2.123506 |   |    |    | *  | P | P | P | P |
| 0.163111 |   |    |    |    | P | P | P | A |
| 0.378348 |   |    |    |    | P | P | P | P |
| 2.528536 |   |    |    | *  | P | P | P | P |
| 1.597976 |   |    |    |    | P | P | P | P |
| 0.60978  |   |    |    |    | P | A | A | A |
| 1.155867 |   |    | *  |    | P | P | P | P |
| 1.691082 |   |    | *  |    | P | P | P | P |

|          |    |   |    |    |   |   |   |   |
|----------|----|---|----|----|---|---|---|---|
| 0.601866 |    |   |    |    | P | P | P | P |
| 1.954868 |    |   |    |    | P | P | A | P |
| 1.856278 |    |   |    |    | P | A | A | P |
| 0.421127 |    |   |    |    | P | P | P | P |
| 0.989918 |    | * |    |    | P | P | P | P |
| 2.867328 | *  |   | *  | ** | P | P | P | P |
|          |    | * | ** |    | P | P | P |   |
| 0.457247 |    |   |    |    | P | P | P | P |
| 4.502002 | *  | * |    | *  | P | P | A | P |
| 0.413492 |    |   |    |    | P | P | P | P |
|          |    |   |    |    | P | P | A |   |
| 0.083086 | ** |   |    |    | P | P | A | A |
| 2.086257 |    |   |    | *  | P | P | P | P |
| 0.715502 | *  |   |    |    | P | P | P | P |
|          | ** |   |    |    | P | P | P |   |
| 1.673153 |    |   | *  |    | P | P | P | P |
| 0.402132 | *  |   |    |    | P | P | P | P |
| 5.920248 |    |   | ** | *  |   | P | P | P |
| 1.475901 |    |   |    |    | P | P | P | P |
| 0.478924 |    |   |    |    | P | P | P | P |
| 0.544598 |    |   |    |    | P | P | P | P |
|          | *  |   | *  |    | P | P | P |   |
| 0.762714 |    |   |    |    | P | P | P | P |
| 0.215364 | *  |   |    |    | M | P | A | A |
| 0.486891 |    |   |    |    | P | P | P | P |
| 1.16299  |    |   | *  |    | M | P | P | A |
| 0.621225 |    |   |    |    | P | P | P | P |
| 4.830242 | *  | * | ** | *  | P | P | P | P |
| 0.796067 |    |   | *  |    | P | P | P | P |
| 2.066411 |    |   | *  | *  | P | P | P | P |
| 0.32074  |    |   |    |    | P | P | P | P |
|          |    | * |    |    |   | M |   |   |
| 0.637052 |    | * |    |    | P | P | P | P |
| 1.316958 | *  |   | *  |    | P | P | P | P |
| 3.122391 |    |   | *  | ** | P | P | P | P |
| 0.411541 |    |   |    |    | P | P | P | P |
| 0.510562 |    |   |    |    |   | A |   | A |
| 0.478903 |    |   |    |    | P | P | P | P |
| 2.102013 |    |   |    | *  | P | P | P | P |
| 1.721689 |    |   | *  |    |   | M | P | P |

|          |    |    |    |   |   |   |   |
|----------|----|----|----|---|---|---|---|
| 0.960019 |    |    |    | P | P | P | P |
|          | *  |    |    | P |   |   |   |
| 0.437746 |    |    |    | P | P | P | P |
| 3.123462 |    | *  | ** | P | P | P | P |
| 1.845504 |    |    |    | A |   |   | P |
| 4.77997  |    | ** | *  | P | P | P | P |
| 2.866117 |    | *  | ** | P | P | P | P |
| 0.521174 |    |    |    | P | P | P | P |
| 0.033242 |    |    |    | M | A |   | A |
|          |    | *  |    |   |   | M |   |
| 1.266066 |    |    |    | P | A | A | A |
| 2.551552 |    |    | *  | P | P | P | A |
| 1.051363 | *  |    |    | P | P | P | P |
| 0.582758 | *  | ** |    | P | P | A | A |
| 0.780656 |    | *  |    | P | P | P | P |
|          |    |    |    | A | A |   |   |
| 7.789748 |    |    | ** |   |   |   | M |
| 2.522769 |    | ** | *  | P | P | P | P |
| 55.92291 |    | ** | ** |   |   | P | P |
|          |    |    |    |   |   | A |   |
|          |    |    |    |   | M | A |   |
| 2.313803 |    |    | *  | P | P | P | P |
| 0.264686 |    |    |    | P | P | P | P |
| 1.786942 |    | *  |    | P | P | P | P |
|          |    |    |    |   | A |   |   |
| 0.918573 |    |    |    | P | P | P | P |
|          |    | ** |    |   | M |   |   |
| 0.699064 |    |    |    | P | P | P | P |
| 0.550806 |    |    |    | P | P | P | P |
|          |    | *  |    | P | M | A |   |
| 0.905494 |    |    |    | A |   |   | A |
| 0.478484 |    |    |    | P | P | P | P |
| 0.373599 | *  |    |    | P | M | A | A |
| 1.946864 |    |    |    | P | P | P | P |
|          | *  |    |    | P |   |   |   |
| 0.41557  |    |    |    | P | P | A | A |
| 0.39376  |    |    |    | P | P | P | P |
| 1.253153 |    |    |    | A | M | P | P |
| 0.507564 |    |    |    | P | P | P | P |
| 1.739496 | ** |    |    | P | P |   | P |

|          |    |    |    |   |   |   |   |
|----------|----|----|----|---|---|---|---|
| 4.681576 | *  | *  | *  | A | P | P | P |
|          |    | ** |    | P |   | P |   |
| 0.27513  |    |    |    | P | P | A | A |
| 0.396941 |    |    |    | P | P | P | A |
| 0.990073 |    |    |    | P | P | P | P |
| 1.618117 |    | ** |    | P | P | P | P |
| 12.47874 |    |    | ** |   |   |   | M |
| 0.698774 |    |    |    | P | P | P | P |
| 25.44585 |    |    | ** |   | A |   | P |
| 3.607914 |    | *  | *  | P | P | P | P |
|          |    | ** |    |   |   | P |   |
| 1.026132 |    |    |    | P | P | P | P |
| 0.679772 |    |    |    | P | M | A | A |
| 2.048848 |    |    | *  | A | A |   | M |
| 2.285054 |    |    | *  | P | P | P | P |
| 3.345987 |    |    | *  |   |   |   | P |
| 2.228071 |    | ** | *  | P | P | P | P |
| 2.216909 |    |    | *  | P | P | P | P |
| 0.514301 |    |    |    | P | P | P | P |
| 0.367191 |    |    |    |   | A |   | A |
| 2.391789 |    |    | *  |   |   |   | P |
| 0.578643 |    |    |    | P | P | A | P |
|          |    |    |    | A |   |   |   |
| 1.440256 |    | *  |    | P | P | P | P |
| 3.820096 |    | ** | *  | P | P | P | P |
| 0.301608 |    |    |    | A | P | P | A |
| 1.729893 |    | *  |    | P |   | P | P |
| 2.135176 |    |    | *  | P | P | P | P |
|          | ** |    |    | P | P |   |   |
|          |    | *  |    | P |   | M |   |
|          |    |    |    |   | A | A |   |
| 0.411682 |    |    |    | P | P | P | P |
| 0.046289 |    |    |    | A | P | A | A |
|          | ** |    |    |   | P |   |   |
| 0.794881 |    |    |    | P | P | M | P |
| 1.697832 |    |    |    |   | A | A | P |
| 0.522749 |    |    |    | P | P | P | P |
| 2.516293 |    |    | *  | P | P | P | P |
| 0.298958 |    |    |    | P | P | P | P |
| 5.374721 |    | ** | *  | P | P | P | P |

|          |    |    |    |   |   |   |   |
|----------|----|----|----|---|---|---|---|
| 3.157047 |    |    | ** | P | P | P | P |
| 1.474526 | *  | ** |    | P | P | P | P |
|          |    |    |    |   | A | A |   |
| 1.069637 |    |    |    | P | P | P | P |
| 3.341875 |    |    | *  |   |   |   | P |
|          | *  |    |    |   | M |   |   |
| 0.410041 |    |    |    | P | P | P | P |
|          |    |    |    |   | P | P |   |
| 0.427371 |    |    |    | P | P | P | P |
| 1.802342 |    | *  |    | P | P | P | P |
| 2.465481 |    | *  | *  | P | P | P | P |
|          |    |    |    |   | A | A |   |
| 0.21902  |    |    |    | P | P | P | P |
| 1.601056 |    | *  |    |   | A | P | A |
|          |    | *  |    |   |   | M |   |
| 4.647523 | *  | *  | *  | P | P | P | P |
|          |    |    |    |   | P |   |   |
| 0.700439 | *  |    |    | P | P | P | P |
| 1.186151 |    |    |    | P | P | P | P |
|          | ** |    |    | P | A | A |   |
| 0.490739 |    |    |    | P | P | P | P |
|          | *  |    |    |   | P |   |   |
|          | *  |    |    | P | P | A |   |
| 7.403554 |    | ** | ** | P | P | P | P |
| 0.295599 |    |    |    | P | P | P | P |
| 0.235658 |    |    |    | P | P | P | P |
| 2.365908 |    | ** | *  | P | P | P | P |
| 2.843352 |    |    | ** | P | P | P | P |
| 0.997045 | *  |    |    | P | P | P | A |
| 2.356087 |    |    | *  |   |   | P | P |
| 1.341323 |    | *  |    | P | P | P | P |
| 0.324474 |    |    |    | P |   |   | A |
| 0.417255 |    |    |    | P | M | A | A |
|          |    |    |    |   | P | A |   |
| 0.978109 |    |    |    | P | P | P | P |
| 3.341676 |    | *  | *  | P | P | P | P |
| 1.280972 |    | *  |    | P | P | P | P |
| 0.770647 | *  |    |    | P | P | P | P |
| 0.482826 |    |    |    | P | P | P | P |
| 2.405541 | ** |    | *  | P | P | P | P |



|          |    |    |    |   |   |   |   |
|----------|----|----|----|---|---|---|---|
|          |    |    |    |   | P | A |   |
|          |    |    |    | A | A | A |   |
| 0.636964 |    |    |    | P | P | P | P |
| 0.457835 |    |    |    | P | P | P | P |
| 0.555519 | *  |    |    | P | P | P | P |
| 0.218731 |    |    |    | P | P | P | P |
| 0.396679 |    |    |    | P | P | P | P |
| 0.476685 |    |    |    | P | P | P | P |
| 0.354069 |    |    |    | P | P | P | P |
| 0.270098 |    |    |    | P | P | P | A |
| 0.160455 | ** | *  |    | P | P | A | A |
| 0.669558 |    |    |    | A | P | A | A |
|          |    |    |    |   | M | A |   |
| 0.799189 |    |    |    | P | P | P | P |
| 3.58111  |    | *  | *  | P | M | P | P |
| 2.416748 | *  |    | *  | P | P | P | P |
| 1.241154 | ** |    |    | P | P | P | P |
| 3.760248 |    |    | *  | P | P | P | P |
| 1.759346 |    | *  |    | P | P | P | P |
| 2.929272 |    |    | ** | P | P | P | P |
| 4.848114 |    | ** | *  | P |   | M | P |
| 3.691946 |    |    | *  | A |   |   | P |
| 2.505265 |    |    | *  | P | P | P | P |
| 1.868222 | *  | *  |    | P | P | P | P |
|          |    |    |    |   | A |   |   |
| 1.044342 |    | *  |    | P | P | P | P |
| 2.468035 | ** |    | *  | P | A | A | P |
|          |    |    |    | P | P | P |   |
| 1.352624 | ** | *  |    | P | P | A | P |
| 0.461137 |    |    |    | P | P | A | A |
| 0.233425 |    |    |    | A | P | A | A |
| 2.023479 |    | *  | *  | P | P | P | P |
| 0.519221 | *  |    |    | P | P | P | P |
| 0.87855  |    | ** |    | P | P | P | P |
| 0.195369 |    |    |    | P | P | P | P |
| 0.669445 |    | *  |    | A | A |   | A |
| 0.88306  |    |    |    | P | P | A | A |
| 3.859013 | *  | ** | *  | P | P | P | P |
| 0.367396 |    |    |    | P | P | M | A |
| 2.412594 |    | *  | *  | P | P | P | P |

|          |    |    |    |    |   |   |   |
|----------|----|----|----|----|---|---|---|
| 0.129091 |    |    |    | P  | P | P | P |
| 0.362861 |    |    |    | P  | P | P | P |
|          |    |    |    |    | P | M |   |
| 2.325315 |    |    | *  | P  | P | P | P |
| 1.968621 |    | *  |    | A  | P | P | P |
| 1.047754 | ** |    |    | P  | P | P | P |
| 0.764146 | *  |    |    | P  | P | P | P |
| 5.056584 |    | ** | *  | P  | P | P | P |
| 0.495008 |    | *  |    | P  | P | P | P |
|          |    |    |    | M  |   | A |   |
| 0.219255 |    |    |    | P  | P | P | P |
| 2.135158 |    |    | *  | P  | P | A | P |
| 0.139278 |    |    |    | P  | P | A | A |
| 0.714969 |    |    |    | P  | P | P | P |
| 0.461416 |    |    |    | P  | P | P | P |
| 3.030926 |    |    | ** | P  | P | A | P |
|          | *  |    |    | P  | P | A |   |
| 11.78424 | *  | *  | ** | P  | P | P | P |
| 4.531073 | *  | *  | *  | P  | P | P | P |
| 0.955958 |    |    |    | P  | P | P | P |
| 2.189153 |    |    | *  | P  | P | P | P |
| 2.188158 |    |    | *  | P  | P | P | P |
| 5.847838 |    | ** | *  | P  | P | P | P |
| 3.53894  |    |    | *  |    | P | P | P |
| 1.641235 |    | *  |    | P  | P | P | P |
| 6.684909 |    | *  | ** | ** | P | P | P |
| 1.681039 |    | *  |    |    | P | P | P |
| 2.503253 | *  |    | *  |    | P | P | A |
| 2.394685 |    | *  | *  |    | P | P | P |
| 0.227702 |    | *  |    |    | P | P | A |
| 3.320927 |    | *  | *  |    | P | P | P |
| 0.408442 |    |    |    |    | P | P | P |
| 0.707419 | ** |    |    |    | P | P | P |
| 0.455772 |    |    |    |    | P | P | P |
| 2.646196 |    | *  | *  |    | P | P | P |
|          |    |    |    |    |   | A |   |
| 0.112015 |    |    |    |    | P | P | A |
| 7.485089 |    | ** | ** |    | P | A | P |
| 3.937083 | *  | *  | *  |    | P | P | P |
| 1.574576 |    | *  |    |    | A | A | M |

|          |    |    |    |   |   |   |   |
|----------|----|----|----|---|---|---|---|
| 0.535275 |    |    |    | P | P | P | P |
| 0.525128 |    |    |    | P | P | P | P |
| 0.760668 |    |    |    | P | P | P | A |
|          |    | ** |    | M | A | P |   |
| 1.668973 | *  |    |    | A | P |   | P |
| 0.706721 |    |    |    | P | P | P | P |
| 7.482135 | *  | *  | ** | P | P | P | P |
| 1.409796 |    | ** |    | M | M | P | A |
| 2.637445 |    |    | *  | P | P | P | P |
|          | *  |    |    | P | P | M |   |
| 0.492171 |    |    |    | P | P | A | A |
| 0.542572 |    |    |    | P | P | P | P |
| 0.391276 |    |    |    | P | P | P | A |
| 0.359779 |    |    |    | P | P | P | P |
| 2.708605 |    | *  | *  | P | P | P | P |
| 3.368413 |    |    | *  | P | P | A | P |
| 0.321954 |    |    |    | P | P | P | P |
|          | ** |    |    | P |   | P |   |
| 0.478537 |    |    |    | P | P | P | P |
| 2.036666 | *  | ** | *  | P | P | P | P |
| 21.62703 |    |    | ** |   |   |   | P |
| 0.946224 |    |    |    | P | P | P | P |
| 1.186821 |    |    |    | P | P | P | P |
| 1.720748 | *  |    |    | P | P | P | P |
| 14.30696 |    |    | ** | A | A | A | P |
| 0.671579 |    |    |    | P | P | P | P |
|          | ** |    |    |   | P |   |   |
| 1.764743 |    | ** |    | P |   | P | P |
| 2.284557 |    |    | *  |   | A |   | P |
|          |    | *  |    | P |   | P |   |
|          | ** |    |    | M |   |   |   |
|          | ** |    |    | A |   |   |   |
|          | ** |    |    | P | P | P |   |
|          |    | *  |    |   | P |   |   |
| 0.047531 |    |    |    |   |   |   | A |
| 0.498829 |    |    |    | P | P | A | A |
| 21.18084 | ** | ** | ** |   | P | P | P |
|          |    |    |    |   |   | A |   |
| 0.573199 |    |    |    | P | P | P | P |
| 0.950567 |    |    |    | P | P | P | P |

|          |    |    |    |   |   |   |   |
|----------|----|----|----|---|---|---|---|
| 0.986067 | *  |    |    | P | P | P | P |
| 0.676812 |    |    |    | P | P | A | A |
|          |    |    |    | P | A |   |   |
| 0.886331 |    |    |    | P | M | A | P |
| 1.005166 |    |    |    | P | P | A | A |
| 3.324863 |    |    | *  | A |   | M | P |
| 4.623348 |    | ** | *  | P | P | P | P |
|          |    |    |    |   | A |   |   |
| 0.608412 |    |    |    | P | P | P | P |
| 0.510255 |    |    |    | P | P | P | A |
| 1.739425 |    |    |    |   | A |   | P |
| 1.720579 |    | *  |    | P | P | P | P |
| 1.0728   |    | *  |    | P | P | P | P |
| 1.218894 |    | *  |    | P | M | P | M |
| 2.187599 |    |    | *  | P | P | P | P |
| 0.391619 |    |    |    | P | P | A | P |
|          | *  |    |    |   | P |   |   |
|          |    |    |    | P | P | A |   |
| 1.157007 |    |    |    | M | A | A | P |
|          |    |    |    | A |   |   |   |
|          |    |    |    |   |   | A |   |
| 5.589619 |    |    | *  |   | A |   | P |
|          |    |    |    | P | P | A |   |
| 0.313755 |    |    |    | P | P | P | P |
| 0.611677 |    |    |    | P | P | P | A |
|          |    | *  |    |   | P | P |   |
| 0.53276  |    |    |    | P | P | P | P |
|          |    |    |    | M |   |   |   |
| 2.32488  |    |    | *  | A | P |   | P |
| 7.485289 |    | ** | ** | P | A | P | P |
|          | ** |    |    |   | P |   |   |
| 1.535796 |    |    |    | P | P | P | A |
|          | ** |    |    |   | P |   |   |
| 2.027596 |    |    | *  | A | A |   | A |
|          | ** |    |    | P |   |   |   |
|          |    |    |    | A |   | A |   |
| 4.532129 |    |    | *  |   |   |   | P |
|          |    | ** |    |   |   | P |   |
|          |    |    |    |   | A |   |   |
| 1.483944 | *  |    |    | P | P | P | P |

|          |    |    |    |    |   |   |   |   |
|----------|----|----|----|----|---|---|---|---|
| 1.043505 |    |    |    |    | P | P | A | P |
| 0.584546 |    |    |    |    | P | P | P | A |
|          |    |    |    |    | A |   |   |   |
|          |    |    | *  |    | P | P | P |   |
|          |    |    |    |    | A |   |   |   |
| 6.545789 |    |    |    | ** |   |   |   | M |
| 1.10845  | *  |    |    |    | P | P | P | P |
|          |    | ** |    |    |   | P |   |   |
| 2.398103 |    |    |    | *  |   |   |   | P |
|          |    |    |    |    | P | P | A |   |
|          |    |    |    |    |   | A |   |   |
| 0.449838 |    |    |    |    |   |   |   | A |
| 1.429775 | ** | *  |    |    | P | P |   | P |
|          |    |    |    |    |   | A |   |   |
|          |    |    |    |    | A |   |   |   |
|          |    | ** |    |    | A | P | A |   |
|          | ** |    |    |    | M |   |   |   |
|          |    |    |    |    | M | A |   |   |
|          |    |    |    |    | A |   |   |   |
|          |    |    | ** |    |   |   | P |   |
|          | *  |    |    |    | P |   |   |   |
| 0.528545 |    |    |    |    | P | P | A | M |
| 1.152081 | *  |    |    |    | P | P | A | P |
|          |    | *  |    |    |   | P | P |   |
| 27.69871 |    |    | ** | ** | P |   | P | P |
| 0.415748 |    |    |    |    | P | P | P | P |
| 0.297883 |    |    |    |    | P | P | P | P |
| 0.376831 |    |    |    |    | P | P | A | A |
| 0.48058  |    |    |    |    | P | P | P | P |
| 11.6416  | *  | *  | ** | ** | P | P | P | P |
|          |    | *  |    |    |   | P |   |   |
| 0.544753 |    |    |    |    | P | A | A | P |
| 0.439462 |    |    |    |    | P | P | P | P |
| 3.32032  |    |    |    | *  |   |   |   | P |
| 0.476469 |    |    |    |    | P | P | P | P |
|          |    | ** |    |    | M | A | P |   |
| 8.349726 |    |    | *  | ** | P |   | P | P |
| 4.857662 |    | *  |    | *  | P | P | P | P |

|          |   |    |    |   |   |   |   |
|----------|---|----|----|---|---|---|---|
|          |   | ** |    |   | P |   |   |
| 1.03838  |   |    |    | P |   | M | P |
|          |   |    |    |   | A |   |   |
| 5.354684 |   |    | *  |   |   |   | P |
|          |   | ** |    |   |   | P |   |
|          |   |    |    | P | A | A |   |
|          |   |    |    | P | P | A |   |
|          |   |    |    |   |   | A |   |
| 0.739275 |   |    |    | P | A | A | A |
| 2.068099 |   |    | *  |   | P |   | M |
| 2.862629 |   |    | ** | P | P | P | P |
| 0.413329 |   |    |    | P | P | P | P |
|          |   |    |    |   | A |   |   |
| 0.843007 |   | *  |    |   |   | P | A |
| 2.292807 |   |    | *  | A |   | P | P |
| 20.93817 |   |    | ** | P | P | A | P |
|          |   | *  |    |   | P |   |   |
| 0.547964 |   |    |    | A |   |   | A |
|          | * |    |    | P |   |   |   |
| 0.16837  |   |    |    | P | P | A | A |
| 0.449657 |   |    |    | P | P | P | A |
| 2.617764 |   | ** | *  | P | A | P | P |
| 0.459573 | * |    |    | P | P | P | P |
|          |   | ** |    |   | P |   |   |
|          |   |    |    | P |   | P |   |
| 7.337218 |   |    | ** |   | P |   | P |
|          |   |    |    | A |   |   |   |
|          |   |    |    | A |   | A |   |
|          | * |    |    | P | M | P |   |
| 0.36032  |   |    |    | P | P | A | A |
|          |   |    |    | P |   | A |   |
|          |   |    |    | P | P | A |   |
| 2.474514 |   |    | *  | P | P | P | M |
|          | * |    |    | P | P |   |   |
| 4.084176 |   | *  | *  | P | P | P | P |
| 0.492426 |   |    |    | P | P | P | P |
| 1.470519 |   |    |    | P | P | P | P |
|          |   |    |    | P | A | P |   |
| 1.332811 |   | *  |    |   | P | P | M |
| 0.182865 |   |    |    | P | P | P | A |

|          |    |    |    |    |   |   |   |   |
|----------|----|----|----|----|---|---|---|---|
| 0.372923 |    |    |    |    | P | P | P | P |
| 3.20107  | *  |    | *  | ** | P | P | P | P |
|          | *  |    |    |    | M |   | P |   |
| 0.898426 | *  | *  |    |    | P | P | P | P |
|          |    |    | ** |    |   |   | P |   |
| 0.852684 |    |    |    |    | P | P | P | P |
| 2.184439 |    |    |    | *  | P | P | P | P |
| 1.548453 |    |    |    |    | A | A | A | M |
| 4.518439 |    |    | ** | *  | P | P | P | P |
| 0.869115 | *  |    |    |    | P | P | P | M |
| 2.529404 |    |    | ** | *  | P | A | P | P |
| 0.369731 |    |    |    |    | P | P | P | A |
| 0.883013 |    |    |    |    | P | P | P | P |
|          | *  |    |    |    | P |   |   |   |
| 0.494391 |    |    |    |    | P | P | P | P |
| 2.909775 | ** |    | ** | ** | P | P | P | P |
| 4.384937 | *  |    | ** | *  | P | P | P | P |
| 17.39327 |    |    | *  | ** | P |   | P | P |
| 2.427881 |    | *  |    | *  | P | P | P | P |
|          |    | *  |    |    | P | P | P |   |
| 5.244718 |    |    |    | *  | P | A |   | P |
| 1.830044 |    |    |    |    | P | P | A | M |
| 1.710536 | *  | *  |    |    | P | P | P | P |
| 2.775268 |    |    |    | *  | P | P | P | P |
|          | ** |    |    |    | P | P |   |   |
| 0.234097 |    |    |    |    | P | P | P | A |
|          |    | ** |    |    | A | P |   |   |
|          |    |    |    |    |   | A | P |   |
|          |    |    |    |    | A |   |   |   |
| 0.303664 |    |    |    |    | A | P |   | A |
| 0.405398 |    |    |    |    | P | P | P | P |
| 0.802122 |    |    |    |    | P | P | P | A |
| 1.29134  |    |    | *  |    | P | P | P | A |
|          |    |    |    |    | A |   |   |   |
| 2.631362 | ** |    | *  | *  | P | A | P | P |
| 0.215667 |    | ** |    |    |   | P | A | A |
| 1.19528  |    |    |    |    | P | P | A | P |
| 2.534976 |    | *  |    | *  | P | P | P | P |
| 0.296472 |    |    |    |    | P | P | P | P |
|          |    |    | ** |    |   |   | P |   |

|          |    |    |    |   |   |   |   |
|----------|----|----|----|---|---|---|---|
| 1.638756 |    | *  |    | P | P | P | P |
| 0.306368 |    |    |    | P | P | P | P |
|          |    |    |    | P | A | P |   |
| 0.958544 |    | *  |    | A | A | P | P |
| 0.31134  |    |    |    | P | P | P | A |
|          |    |    |    | P | P | P |   |
|          | *  |    |    | P | M | P |   |
| 1.647121 |    | *  |    | P |   | P | P |
|          |    |    |    |   |   | A |   |
| 11.79117 |    |    | ** |   |   |   | P |
|          |    |    |    | P | A |   |   |
| 1.782966 | *  |    |    | P |   | A | P |
| 0.162031 |    |    |    | P | P | P | A |
| 0.938336 |    |    |    | P | A |   | A |
| 1.385539 |    | *  |    | P | P | P | P |
|          |    |    |    |   |   | A |   |
|          |    |    |    |   |   | A |   |
|          |    | ** |    | P | P | P |   |
|          |    | ** |    |   |   | M |   |
|          | *  | *  |    | P |   | P |   |
| 0.450097 |    |    |    | P | P | P | P |
| 0.955169 |    |    |    | P | P | P | M |
| 1.624974 |    |    |    | A | P | P | P |
| 0.477792 |    |    |    | P | P | P | A |
| 0.403081 |    |    |    | P | P | P | P |
|          | ** |    |    | M |   |   |   |
|          |    |    |    | P |   | A |   |
|          |    |    |    | A |   | A |   |
| 0.641606 |    |    |    | P | P | P | P |
| 2.974203 |    | *  | ** | P |   | P | P |
| 0.566229 |    |    |    | P | P | A | A |
|          |    |    |    |   | P | A |   |
| 0.123301 |    |    |    | P | P | P | A |
| 1.826497 |    | *  |    | P | P | P | P |
| 5.412825 |    |    | *  |   | P | A | P |
|          |    |    |    |   |   | A |   |
|          |    |    |    | P | A | A |   |
| 2.642819 |    |    | *  | P | P | P | P |
|          |    |    |    | A |   |   |   |
|          |    |    |    | A | P | A |   |



|          |    |    |    |   |   |   |   |
|----------|----|----|----|---|---|---|---|
|          |    |    |    |   | A |   |   |
| 23.00143 |    |    | ** |   |   |   | M |
|          |    |    |    |   |   | A |   |
|          |    |    |    | M |   | A |   |
| 1.066862 |    |    |    | P | P | P | P |
|          |    |    |    |   | A |   |   |
| 0.248105 |    |    |    | M | P | P | A |
|          | *  |    |    | P |   |   |   |
| 0.733014 |    |    |    | P | P | P | M |
| 0.579718 |    |    |    | P | P | P | P |
| 2.117606 |    |    | *  | P | P |   | P |
| 1.94173  |    | *  |    | A | M | P | M |
| 17.05169 |    |    | ** | A |   |   | P |
| 1.067896 |    | ** |    | P | P | P | P |
| 0.625171 |    |    |    |   | A | A | A |
| 3.635201 |    |    | *  |   | P | A | P |
| 4.463093 |    |    | *  |   |   |   | M |
| 1.901631 | *  |    |    | P | P | P | P |
| 1.816676 | *  |    |    | P | M | P | P |
| 2.531847 | ** | *  | *  | P | P | P | P |
| 0.627706 |    |    |    | P | P | P | P |
| 3.367818 |    | ** | ** | P | P | P | A |
|          | *  | *  | *  | P | P | P |   |
|          |    |    |    | A |   |   |   |
| 1.431738 |    |    |    | P | P | P | P |
|          |    |    |    | P | A | M |   |
| 0.266568 |    |    |    | P | P | P | P |
|          | ** | *  |    | P | M | A |   |
| 0.441043 |    |    |    | P | P | P | P |
|          |    |    |    | P | P | A |   |
| 0.289939 |    |    |    | A |   |   | A |
| 0.38838  |    |    |    | P | P | P | A |
|          |    |    |    |   | A |   |   |
|          |    |    |    | A |   |   |   |
| 1.002368 | *  |    |    | P | A | A | A |
| 3.3799   |    | *  | *  | P | P | P | P |
|          |    | *  |    | P | P | P |   |
| 0.865768 |    |    |    | P | P | A | A |
| 2.448569 |    | *  | *  | P | P | P | P |
|          | *  |    |    | P |   |   |   |

|          |    |    |    |  |   |   |   |
|----------|----|----|----|--|---|---|---|
|          |    |    | ** |  |   | P |   |
|          | *  |    |    |  | P | P |   |
| 0.795513 |    |    |    |  | P | P | A |
|          |    | *  |    |  | A | A |   |
| 0.969933 |    | ** |    |  |   | P | P |
| 0.686297 |    |    |    |  | A | M | A |
|          |    |    |    |  |   | A |   |
|          |    |    |    |  | A |   |   |
| 0.612748 | ** |    |    |  | P |   | A |
| 12.46333 |    |    | ** |  | P | A | P |
| 0.787849 |    |    |    |  | A | M | A |
| 3.519059 |    |    | *  |  | P | A | P |
| 1.109374 |    |    |    |  | P | P | P |
| 0.585495 | *  |    |    |  | P | P | P |
| 2.144553 |    |    | *  |  | P | A | M |
| 4.238418 |    |    | *  |  |   |   | P |
| 0.320581 |    |    |    |  | P | P | P |
| 5.033448 |    | *  | *  |  | P | P | P |
| 0.394013 |    |    |    |  | P | P | P |
| 0.418787 |    |    |    |  | P | P | P |
| 2.398981 |    |    | *  |  | P | P | P |
| 0.431827 |    |    |    |  | P | P | P |
| 0.509633 |    |    |    |  | P | P | P |
| 0.486671 |    |    |    |  | P | P | P |
| 1.004373 |    |    |    |  | P | P | P |
| 0.335025 |    |    |    |  | P | P | P |
| 2.162767 |    |    | *  |  | P | P | P |
| 0.436187 |    |    |    |  | P | P | P |
| 0.205428 |    | *  |    |  | P | P | A |
| 1.210566 |    |    |    |  | P | P | P |
| 33.84251 | *  | ** | ** |  | P |   | P |
|          | ** |    |    |  | M |   |   |
| 0.446143 |    |    |    |  | P | P | P |
|          |    |    |    |  |   | A |   |
|          |    | *  |    |  | A | P |   |
| 0.469769 |    |    |    |  | P | P | P |
| 0.435614 |    |    |    |  | P | P | P |
| 0.434319 |    |    |    |  | P | P | P |
| 0.460954 |    |    |    |  | P | P | P |
| 0.833432 |    |    |    |  | P | P | P |

|          |    |    |    |   |   |   |   |
|----------|----|----|----|---|---|---|---|
|          |    |    |    |   | M | A |   |
| 1.320225 |    |    |    | P | P | P | P |
| 0.264703 |    |    |    | P | P | P | P |
| 1.100298 |    |    |    | P | P | P | P |
| 2.03801  |    |    | *  | P | A | A | P |
| 0.440576 |    |    |    | P | P | P | P |
| 0.4704   |    |    |    | P | P | P | P |
| 2.080381 |    | *  | *  | P | P | P | P |
| 0.536036 |    |    |    | P | P | P | P |
|          |    |    |    |   | A |   |   |
|          |    |    |    |   | A | A |   |
| 1.339279 | *  |    | *  | P | P | P | P |
| 0.270681 |    |    |    | P | P | P | P |
| 0.278338 |    |    |    | P | P | P | P |
| 47.32875 |    | ** | ** | P |   | P | P |
| 0.499646 |    |    |    | P | P | P | P |
| 3.252784 |    | *  | *  | P | P | P | P |
| 0.964159 | ** |    |    | P | P | P | P |
| 0.82663  |    |    |    | P | P | P | P |
| 0.975149 |    |    |    | P | P | P | P |
| 1.153754 |    |    |    | P | P | P | P |
| 3.222294 |    | *  | ** | P | P | P | P |
| 0.475058 |    |    |    | P | P | P | P |
| 0.811483 |    |    |    | P | P | A | A |
| 0.923134 |    | *  |    | P | P | P | P |
| 2.493227 |    | *  | *  | P | P | P | P |
|          |    |    |    |   | A | P |   |
| 0.244227 |    |    |    | P | P | P | P |
| 1.509613 |    | ** |    | P | P | P | P |
| 0.739927 |    |    |    | P | P | P | A |
| 0.403379 |    |    |    | P | P | P | P |
| 3.831101 |    | *  | *  | P | P | P | P |
| 1.22846  |    | ** |    | P | P | P | P |
| 0.38237  |    |    |    | P | P | P | P |
| 3.448653 |    |    | *  | P | P | P | P |
| 0.390293 |    |    |    | P | P | P | P |
| 0.571334 |    |    |    | P | P | P | P |
| 1.402048 | *  | ** |    | P | P | P | P |
|          |    |    |    | A | P | A |   |
| 0.295705 |    |    |    | P | P | P | A |

|          |    |   |    |   |   |   |   |
|----------|----|---|----|---|---|---|---|
| 1.403135 |    |   | *  | P | P | P | P |
| 0.474225 |    |   |    | P | P | P | P |
| 1.175323 |    |   | *  | P | P | P | P |
| 0.454523 |    |   |    | P | P | P | P |
| 0.333799 |    |   |    | P | P | P | P |
| 1.136857 |    |   | *  | P | P | P | P |
|          |    |   |    | P | P | A |   |
| 1.495897 |    |   |    | P | P | P | P |
| 0.524179 |    |   |    | P | P | P | P |
|          |    |   | *  | A | P | P |   |
| 1.327183 |    |   | *  | P | P | P | P |
| 0.408013 |    | * |    | P | P | P | P |
| 0.503485 | *  |   |    | P | P | P | P |
| 0.498684 |    |   |    | P | P | P | P |
| 1.318893 |    | * |    | P | P | P | P |
| 0.426641 |    |   |    | P | P | P | P |
| 0.458764 |    |   |    | P | P | P | P |
| 0.552537 |    |   |    | P | P | P | P |
| 0.514931 |    |   |    | P | P | P | P |
| 0.531319 |    |   |    | P | P | P | P |
| 1.25476  |    |   |    | P | P | P | P |
| 0.671536 |    |   | ** | P | P | P | P |
| 1.873201 |    |   | *  | P | P | P | P |
| 4.188491 | ** |   | ** | * | P | P | P |
| 0.413762 |    |   |    | P | P | P | P |
| 0.78471  |    |   |    | P | P | P | P |
| 1.481195 | *  |   | *  | P | P | P | P |
| 1.169884 |    |   | *  | M | A | P | P |
| 0.298196 |    |   |    | A | P | P | A |
| 0.989271 |    |   |    | P | P | P | P |
| 0.820906 |    |   |    | P | P | P | P |
| 0.857796 | *  |   |    | P | P | P | A |
| 0.633657 |    |   |    | P | P | P | P |
| 2.610185 |    |   |    | * | P | P | P |
| 3.092439 |    |   | ** | P | P | P | P |
| 0.32581  |    |   |    | P | P | P | P |
| 3.874582 |    | * | *  | M |   | P | P |
| 0.760118 |    |   |    | P | P | P | P |
| 0.387209 |    |   |    | P | P | A | P |
| 0.633011 |    |   |    | P | P | P | P |

|          |    |    |    |   |   |   |   |
|----------|----|----|----|---|---|---|---|
|          | ** |    |    | P |   |   |   |
|          | *  |    | *  | M | A | P |   |
| 0.497818 |    |    |    | P | P | P | P |
| 0.499199 |    |    |    | P | P | P | P |
| 0.493718 |    |    |    | P | P | P | P |
| 0.870839 |    |    |    | P | P | P | P |
| 2.693544 |    | *  | *  | P | P | P | P |
| 0.374833 |    |    |    |   | A |   | A |
| 3.292243 |    |    | *  | P | P | P | P |
| 0.493529 |    |    |    | P | P | P | P |
| 0.794402 |    |    |    | P | A | A | A |
| 0.335637 |    |    |    | P | P | P | P |
| 4.649367 |    | *  | *  | P | P | P | P |
| 0.070822 |    |    |    | P |   |   | A |
|          | ** |    |    |   | M |   |   |
| 2.083679 |    |    | *  | P | P | P | P |
| 3.720033 |    | ** | *  |   | P | P | P |
| 0.454349 |    |    |    | P | P | P | P |
| 1.396586 |    |    |    | P | P | P | P |
| 0.414726 |    |    |    | P | P | P | P |
|          |    |    |    |   |   | A |   |
| 3.064507 |    |    | ** | P | P | P | P |
| 1.891718 |    | *  |    | P | P | P | P |
|          |    |    |    | A | P | A |   |
| 0.45362  |    |    |    | P | P | P | P |
|          |    |    |    |   | P | A |   |
|          | *  |    |    | P |   |   |   |
| 0.469419 |    |    |    |   |   | P | P |
| 0.31959  |    |    |    | P | P | P | P |
| 2.838548 |    | *  | *  | P | P | P | P |
| 0.499223 |    |    |    | P | P | P | P |
| 0.328296 |    |    |    | P | P | P | P |
| 1.278144 |    |    |    | P | P | P | P |
| 0.950081 |    |    |    | P | P | P | P |
| 3.416231 |    |    | *  | P |   | A | P |
| 0.031032 | ** |    |    | P | P | A | A |
| 1.30981  |    |    |    | P | P | A | A |
|          |    |    |    | A | A |   |   |
| 0.485966 |    |    |    | P | P | P | P |
| 1.402834 | *  | ** |    | P | P | P | P |

|          |   |    |    |   |   |   |   |
|----------|---|----|----|---|---|---|---|
| 1.274329 |   |    |    | P | P | P | P |
| 2.914243 | * |    | ** | P | P | P | P |
| 1.123913 |   |    |    |   |   | A | A |
| 0.878147 |   |    |    | P | P | P | P |
| 0.474645 |   |    |    | P | P | P | P |
| 6.001936 |   | *  | *  | P | P | P | P |
| 0.862034 |   |    |    | P | P | P | P |
|          |   | ** |    | A | P |   |   |
| 0.489237 |   |    |    | P | P | P | P |
| 3.147051 |   |    | ** | P | P | P | P |
| 0.347779 |   |    |    | P | P | P | P |
| 2.428784 |   |    | *  | P | P | P | P |
| 1.529359 |   | *  |    | P | P | A | P |
| 3.316644 | * |    | *  | P |   |   | P |
| 0.90081  |   | ** |    | P | P | P | P |
| 3.21064  |   |    | ** | P | P | P | P |
| 0.433592 |   |    |    | P | P | P | P |
| 0.495984 |   |    |    | P | P | P | P |
| 0.222443 |   |    |    | P | P | A | A |
| 0.388334 |   |    |    | P | P | P | P |
|          |   |    |    | A |   |   |   |
| 0.698416 |   |    |    | P | P | P | A |
| 1.797655 |   | ** | ** | P | P | P | P |
| 0.465565 |   |    |    | P | P | P | P |
| 0.483639 |   |    |    | P | P | P | P |
| 1.490526 |   |    | ** | P | P | P | P |
| 0.460977 |   |    |    | P | P | P | P |
| 0.36546  |   |    |    | P | P | P | P |
| 0.226843 |   |    |    | P | P | P | P |
| 2.647383 |   | *  | *  | P | P | P | P |
|          |   |    |    | P |   | A |   |
| 2.302904 |   |    | *  | P | P | P | P |
| 1.327679 |   | *  |    | P | P | P | P |
| 0.498788 |   |    |    | P | P | P | P |
| 2.379077 |   |    | *  | P | P | P | P |
| 1.986475 |   | ** |    | P | P | P | P |
| 0.432865 |   |    |    | P | P | P | P |
| 2.650804 |   |    | *  | P | P | P | P |
| 3.332638 |   | *  | *  | P | P | P | P |
| 0.331842 |   |    |    | P | P | P | P |

|          |   |   |    |    |   |   |   |   |
|----------|---|---|----|----|---|---|---|---|
| 2.915932 | * | * | *  | ** | P | P | P | P |
| 3.028623 | * |   | ** | ** | P | P | P | P |
| 11.36112 |   |   | ** | ** | P | P | P | P |
| 0.356955 |   |   |    |    | P | P | P | P |
|          |   |   |    |    |   |   | A |   |
|          | * |   |    |    | P | P | P |   |
| 0.680355 |   |   |    |    | P | P | P | P |
| 0.473695 |   |   |    |    | P | P | P | P |
| 0.82008  |   |   | *  |    | P | P | P | P |
| 0.133794 |   |   |    |    | P | P | A | A |
| 0.599206 |   |   |    |    | P | P | P | P |
| 0.814595 | * |   |    |    | P | P | P | P |
| 1.006506 |   |   |    |    | A | P |   | A |
| 0.611948 |   |   |    |    | P | P | P | P |
| 0.475786 |   |   |    |    | P | P | P | P |
| 0.700913 |   |   |    |    | P | P | P | P |
| 0.53301  |   |   |    |    | P | P | P | P |
| 0.440476 |   | * |    |    | P | P | P | P |
| 0.339035 |   |   |    |    | P | P | P | P |
| 2.095332 |   |   |    | *  | P | P | P | P |
| 0.458972 |   |   |    |    | M | P | A | A |
| 0.389332 |   |   |    |    | A |   | A | A |
| 0.24093  |   |   |    |    | P | P | P | P |
| 2.148952 |   |   |    | *  |   |   |   | A |
| 0.180458 |   |   |    |    | P | P | P | P |
| 3.330812 |   |   | *  | *  | P | P | P | P |
| 0.887536 |   |   |    |    | P | A | A | P |
| 0.430665 |   |   |    |    | P | P | P | P |
| 0.329473 |   |   |    |    | P | P | P | P |
| 0.788812 |   |   | *  |    | P | P | P | P |
| 0.834135 | * |   |    |    | P | P | P | P |
| 0.674828 |   |   |    |    | P | P | P | P |
| 0.427033 |   |   |    |    | P | P | P | M |
| 0.305085 |   |   |    |    | P | P | P | P |
| 0.307239 |   |   |    |    | P | P | P | P |
| 0.366099 |   |   |    |    | P | P | P | P |
| 0.320422 |   |   |    |    | P | P | P | P |
| 3.089296 |   |   |    | ** | P | P | P | P |
| 2.193219 |   |   | *  | *  | P | P | P | P |
| 0.568282 |   |   |    |    | P | P | P | P |

|          |    |    |    |   |   |   |   |
|----------|----|----|----|---|---|---|---|
| 1.10444  | ** |    |    | P | P | P | M |
|          |    | *  |    |   | A | P |   |
| 0.470631 |    |    |    | P | P | P | P |
| 0.460049 |    |    |    | P | P | P | P |
| 0.490548 |    |    |    | P | P | P | P |
| 4.034428 |    |    | *  |   |   |   | P |
| 1.54004  |    | *  |    | P | P | P | P |
| 4.996334 |    | ** | *  | P | P | P | P |
| 3.785431 |    | *  | *  | P | P | P | P |
| 1.035719 |    | *  |    | P | P | P | P |
| 0.498551 |    |    |    | P | P | P | P |
| 3.068645 | *  |    | ** | P | P |   | P |
|          | *  |    |    | P |   |   |   |
| 0.578279 |    |    |    | P | P | P | P |
| 2.086568 |    | *  | *  | P | P | P | P |
| 0.444963 |    | ** |    | P | P | P | P |
| 0.405088 |    |    |    | P | P | P | P |
| 1.05974  |    |    |    | P | P | P | P |
| 4.187024 |    |    | *  |   |   | P | P |
| 0.302597 |    |    |    | P | P | P | P |
| 22.77102 | *  | *  | ** | P |   | P | P |
| 2.597852 |    |    | *  | P | P | P | P |
| 2.214388 |    |    | *  | P | P | P | P |
| 1.985129 |    |    |    | P | P | P | P |
| 0.628402 |    |    |    | P | P | P | P |
| 1.605806 |    | *  |    | P | P | P | P |
| 0.103764 |    |    |    | P |   |   | A |
| 1.57714  |    | *  |    | P | P | P | P |
| 0.433577 |    |    |    | P | P | P | P |
| 0.666879 | *  | ** |    | P | P | P | A |
| 0.413574 |    |    |    | P | P | P | P |
| 0.421033 |    |    |    | P | P | P | P |
| 0.863924 |    |    |    | P | P | P | P |
| 1.277581 | *  |    |    | P | P | P | P |
| 0.459562 |    |    |    | P | P | P | P |
| 1.44656  |    |    |    | A | P | P | A |
| 3.087264 |    | ** | ** | P | P | P | P |
| 0.851218 |    |    |    | P | P | P | P |
|          | *  |    |    | P | M | P |   |
| 0.603291 |    |    |    | P | P | P | P |



|          |    |    |    |    |   |   |   |   |
|----------|----|----|----|----|---|---|---|---|
|          |    |    |    |    | P | P | A |   |
| 0.298566 |    |    |    |    | P | P | P | A |
| 1.838922 |    |    | *  |    | P | P | P | P |
| 1.028593 |    |    |    |    | P | P | P | P |
| 0.166338 |    | ** |    |    | P | P | A | P |
| 0.86326  |    |    |    |    | P | P | P | P |
|          |    |    |    |    | M | P | A |   |
| 0.930833 |    |    |    |    | P | P | P | P |
| 0.3273   |    |    |    |    | P | P | P | P |
| 0.732824 |    |    |    |    | P | P | P | P |
|          |    |    |    |    | P |   | A |   |
| 0.373607 |    |    |    |    | P | P | P | P |
| 1.130977 |    |    | *  |    | P | P | P | P |
| 2.020836 |    |    |    | *  | P | P | P | P |
| 0.331595 |    |    |    |    | P | P | P | P |
| 2.193903 |    |    |    | *  | P | P | P | P |
| 0.416067 |    |    |    |    | P | P | P | P |
|          |    |    |    |    |   | P | A |   |
| 1.074501 |    |    |    |    | P | P | P | P |
| 1.736531 |    |    | ** |    | P | A | P | P |
|          |    |    |    |    | P | P | A |   |
| 3.411972 |    |    |    | *  | P | P | P | P |
| 2.245365 |    |    |    | *  | P | P | P | P |
| 0.433838 |    |    |    |    | P | P | P | P |
| 0.361522 |    |    |    |    | P | P | P | P |
| 0.273227 |    |    |    |    | P | P | P | A |
| 3.177057 |    |    |    | ** | P | P | P | P |
|          | *  |    |    |    | M | M |   |   |
| 0.482548 |    |    |    |    | P | P | P | P |
| 40.89316 | ** | ** | ** | ** | P | P | P | P |
| 0.711084 |    |    |    |    | P | P | P | P |
| 1.739881 |    |    | ** |    | P | P | P | P |
| 2.311926 |    |    | *  | *  | P | P | P | P |
| 0.526333 | *  |    |    |    | P | P | P | P |
| 0.508081 |    |    |    |    | P | P | P | P |
| 0.660778 |    |    |    |    | P | P | P | P |
| 12.57614 |    | *  | ** | ** | P | P | P | P |
| 1.46044  |    |    | ** |    | P | P | P | P |
| 0.664236 | *  |    |    |    | P | P | P | P |
| 0.368856 |    |    |    |    | P | P | P | P |

|          |    |   |    |   |   |   |   |
|----------|----|---|----|---|---|---|---|
| 0.60359  |    |   |    | P | P | P | P |
| 1.784584 |    |   |    | P | P | A | A |
|          |    | * |    | P | P | M |   |
| 0.752546 |    |   |    | P | P | P | P |
| 2.524726 |    |   | *  | P | P | P | P |
|          | *  |   |    | P |   |   |   |
| 0.276516 |    |   |    | P | P | P | P |
| 0.172997 | *  |   |    | P | P | P | P |
| 2.937645 |    |   | ** | P | P | P | P |
| 0.552341 |    | * |    | P | P | P | P |
| 0.372909 |    |   |    | P | P | P | P |
| 0.459083 |    |   |    | P | P | P | P |
| 4.866977 |    | * | *  | P | P | P | P |
| 1.013804 |    | * |    | P | P | P | P |
| 0.406496 |    |   |    | P | P | P | P |
| 3.690839 |    |   | *  | P | P | M | P |
| 0.119857 |    |   |    |   |   |   | A |
| 0.50832  |    | * |    | P | P | P | P |
| 0.066263 |    |   |    | P | P | P | A |
| 0.369305 |    |   |    | P | P | P | P |
| 2.719122 |    | * | *  | P | P | P | P |
| 2.843642 |    |   | ** | P | P | P | P |
| 1.458712 |    | * |    | M | A | P | P |
| 0.489466 |    |   |    | P | P | P | P |
|          | *  |   |    | P | P | P |   |
| 0.587054 |    |   |    | P | P | P | P |
| 4.107063 |    |   | *  | P | P | P | P |
| 0.458695 |    | * |    | P | P | P | P |
| 2.103191 | ** |   | ** | P | P | P | P |
| 0.350277 |    |   |    | P | P | P | P |
| 0.436128 |    |   |    | P | P | P | P |
| 0.647971 |    | * |    | P | P | P | P |
| 0.396885 |    |   |    | P | P | P | P |
| 0.393356 |    |   |    | P | P | P | A |
| 2.379471 |    |   | *  | P | P | P | P |
| 2.008846 |    |   | *  | P | P | P | P |
| 1.003676 |    | * |    | P | P | P | P |
| 0.213357 |    |   |    | P | P | P | P |
| 0.877329 |    |   |    | P | P | P | P |
| 3.199758 |    | * | ** | P | P | P | P |

|          |   |    |    |    |   |   |   |   |
|----------|---|----|----|----|---|---|---|---|
| 0.481237 |   |    |    |    | P | P | P | P |
| 0.904218 | * |    |    |    | P | P | P | P |
| 0.479978 |   |    |    |    | P | P | P | P |
| 2.374054 |   |    |    | *  | P | P | P | P |
| 0.406111 |   |    |    |    | P | P | P | P |
| 2.862342 |   |    |    | ** | P | P | P | P |
| 0.51482  |   |    |    |    | P | P | P | P |
| 0.418249 |   |    |    |    | P | P | P | P |
| 1.187309 |   | ** | ** |    | P | P | P | P |
| 2.178708 | * |    | *  | *  | P | P | P | P |
| 0.814986 | * |    |    |    | P | P | P | P |
| 1.189543 |   |    |    |    | P | P | P | P |
| 0.08563  |   |    |    |    | P | P | M | A |
| 0.678368 |   |    |    |    | P | P | P | P |
| 0.499463 |   |    |    |    | P | P | P | P |
| 0.553506 |   |    |    |    | P | P | P | P |
| 2.4034   |   |    | *  | *  | P | P | P | P |
| 0.84107  |   |    |    |    | P | P | A | P |
| 0.291007 |   |    |    |    | P | P | P | P |
| 2.012924 |   |    |    | *  | P | P | P | P |
| 0.418619 |   |    |    |    | P | P | P | P |
| 1.210062 |   |    |    |    | P | P | P | P |
| 5.007693 |   | ** | ** | *  | P | P | P | P |
| 0.491362 |   |    |    |    | P | P | P | P |
| 1.201116 |   |    | ** |    | P | P | P | P |
| 2.361773 |   |    |    | *  | P | P | P | P |
| 0.486454 |   |    |    |    | P | P | P | A |
| 0.608442 |   |    |    |    | P | P | P | P |
| 0.32421  |   |    |    |    | P | P | P | P |
| 0.925226 | * |    |    |    | P | P | P | P |
| 2.095932 |   |    |    | *  | P | P | P | P |
| 0.364842 |   |    |    |    | P | P | P | P |
| 0.549408 |   |    |    |    | P | P | P | P |
| 0.062079 |   |    |    |    | A | P | P | A |
| 0.207356 |   |    |    |    | P | P | A | A |
| 3.028881 | * |    | ** | ** | P | P | P | P |
|          |   |    |    |    |   | A | P |   |
| 0.416922 |   |    |    |    | P | P | P | P |
| 0.185344 |   |    |    |    | P | P | P | P |
| 0.519511 | * |    |    |    | P | P | P | P |

|          |    |    |    |    |   |   |   |   |
|----------|----|----|----|----|---|---|---|---|
| 0.605532 |    |    |    |    | P | P | P | P |
| 0.462277 |    |    |    |    | P | P | P | P |
| 0.344597 |    |    |    |    | P | P | P | P |
|          | *  |    |    |    | P | P | P |   |
| 0.754021 |    |    |    |    | P | P | P | A |
| 1.032475 |    |    | *  |    | P | P | P | P |
| 1.40905  |    |    |    |    | P | P | P | P |
| 0.831766 |    |    |    |    | P | P | P | P |
| 0.285987 |    |    |    |    | P | P | A | A |
| 0.345822 |    |    |    |    | P | P | P | P |
| 1.180741 |    |    |    |    | P | P | P | P |
| 1.231175 | ** |    |    |    | P | P | P | P |
| 0.710065 |    |    |    |    | P | P | P | P |
|          |    |    |    |    |   | P | A |   |
|          |    |    |    |    | P | P | P |   |
| 0.38245  |    |    |    |    | P | P | P | P |
| 10.71477 | *  | *  | ** | ** | P | P | P | P |
| 1.306254 |    |    |    |    | P | P | P | P |
|          |    |    |    |    |   |   | A |   |
| 2.03663  | ** |    |    | *  | P | P | P | P |
| 0.420647 |    |    |    |    | P | P | P | P |
| 0.401075 |    |    |    |    | P | P | A | A |
| 0.714984 |    |    |    |    | P | P | P | P |
| 0.293131 | *  |    |    |    | P | P | P | P |
|          | *  | ** |    |    | P | P |   |   |
| 2.269404 |    |    |    | *  | P | P | P | P |
| 0.421373 |    |    |    |    | P | P | P | P |
| 2.072029 |    |    | *  | ** | P | P | P | P |
|          |    |    |    |    |   |   | A |   |
| 2.32325  |    |    |    | *  |   | M |   | A |
| 0.469999 |    |    |    |    | P | P | P | P |
| 2.282464 | *  |    | *  | *  | P | P | P | P |
| 2.699956 |    |    | *  | *  | P | P | P | P |
| 0.498193 |    |    |    |    | P | P | P | P |
| 0.76287  |    |    |    |    | P | P | P | P |
| 1.345989 |    |    | *  |    | P | P | P | P |
| 0.187025 |    |    |    |    | P | P | P | P |
| 0.470861 |    |    |    |    | P | P | P | P |
| 0.497597 |    |    |    |    | P | P | P | P |
| 0.458859 |    |    |    |    | P | P | P | P |

|          |    |    |    |    |   |   |   |
|----------|----|----|----|----|---|---|---|
| 0.467016 |    |    |    | P  | P | P | P |
| 0.432108 |    |    |    | P  | P | P | P |
| 1.141358 |    |    |    | P  | P | P | P |
| 0.408323 |    |    |    | P  | P | P | P |
| 0.470374 |    |    |    | P  | P | P | P |
| 1.25021  |    |    |    |    | A |   | A |
|          |    |    |    |    | A |   |   |
|          |    |    |    | A  |   |   |   |
| 0.479672 |    |    |    | P  | P | P | P |
| 0.580161 |    |    |    | P  | P | P | P |
|          | ** |    |    | P  | A |   |   |
| 0.247273 |    | *  |    | P  | P | A | A |
| 2.092568 |    |    | *  | P  | P | P | P |
| 3.067854 |    |    | ** | P  | P | P | P |
| 0.221682 |    |    |    | P  | P | P | P |
| 2.692897 |    |    | *  | P  | P | P | P |
| 0.24708  |    |    |    | P  | P | P | P |
| 0.984779 |    |    |    | P  | P | P | P |
|          |    |    | ** | P  | M | M |   |
| 1.299475 |    | ** |    | P  | P | P | P |
| 0.442635 |    |    |    | P  | P | P | P |
| 0.549698 | *  |    |    | P  | P | P | P |
| 3.04512  |    |    | ** | ** | P | P | P |
| 2.473626 |    |    | *  | *  | P | P | P |
| 0.355537 |    |    |    |    | P | P | P |
| 0.307385 |    |    |    |    | P | P | P |
| 0.406073 |    |    |    |    | P | P | P |
| 0.349979 |    |    |    |    | P | P | P |
| 0.879442 |    |    |    |    | P | P | P |
| 4.559577 | ** |    | *  | *  | P | P | P |
| 2.959815 |    | *  | ** | ** | P | P | P |
| 2.193976 |    |    | *  | *  | P | P | P |
| 0.451458 |    | ** |    |    | P | P | P |
| 0.44281  |    |    |    |    | P | P | P |
| 1.766071 |    | *  |    |    | P | P | P |
|          |    |    |    |    | A |   |   |
| 2.06544  |    |    | *  | *  | P | P | P |
| 0.339509 |    |    |    |    | P | P | P |
| 1.0921   |    |    |    |    | P | P | A |
| 0.466003 |    |    |    |    | P | P | P |

|          |    |   |    |    |   |   |   |   |
|----------|----|---|----|----|---|---|---|---|
| 2.174189 |    |   | *  | *  | P | P | P | P |
| 0.488324 |    |   |    |    | P | P | P | P |
| 2.931939 |    |   | *  | ** | P | P | P | P |
| 2.63724  |    |   | *  | *  | P | P | P | P |
| 0.238708 | *  |   | *  |    | P | P | P | A |
| 0.284493 |    |   |    |    | P | P | P | P |
| 0.927557 | *  |   |    |    | P | P | P | P |
| 1.626044 | ** | * | ** |    | P | P | P | P |
| 0.427733 |    |   |    |    | P | P | P | P |
| 2.425821 |    |   |    | *  | P | P | P | P |
| 2.521692 |    |   |    | *  | P | P | P | P |
| 0.412447 |    |   |    |    | P | P | P | P |
| 0.503777 |    |   |    |    | P | P | P | P |
| 0.393969 |    |   |    |    | P | P | P | P |
| 0.47758  |    |   |    |    | P | P | P | P |
| 1.985577 |    | * | ** |    | P | P | P | P |
| 0.397058 |    |   |    |    | P | P | P | P |
| 0.48136  | *  |   |    |    | P | P | P | P |
| 0.175114 |    |   |    |    | P | P | P | P |
| 3.184136 |    |   | *  | ** | P | P | P | P |
| 2.271095 |    |   | *  | *  | P | P | P | P |
| 0.464933 |    |   |    |    | P | P | P | P |
| 0.049402 | *  |   |    |    | P | P | A | A |
| 0.743893 |    |   |    |    | P | P | P | P |
| 0.483382 |    |   |    |    | P | P | P | A |
| 0.575566 |    |   |    |    | P | P | P | P |
| 0.154967 |    |   |    |    | P | A |   | A |
| 0.488636 |    |   |    |    | P | P | P | P |
| 0.335315 |    |   |    |    | P | P | P | P |
| 0.262144 |    |   |    |    | P | P | P | P |
| 0.604512 |    |   |    |    | P | P | P | P |
| 0.658551 |    |   |    |    | P | P | P | P |
| 0.511315 |    |   |    |    | P | P | P | P |
| 4.184038 | ** | * | ** | *  | P | P | P | P |
| 1.729383 |    |   | *  |    | P | P | P | P |
| 0.814685 |    |   |    |    | P | P | P | P |
| 0.471843 |    |   |    |    | P | P | P | P |
| 0.42489  |    |   |    |    | P | P | P | P |
| 0.577974 |    |   | ** |    | P | P | P | P |
| 0.465396 |    |   |    |    | P | P | P | P |

|          |    |    |    |   |   |   |   |
|----------|----|----|----|---|---|---|---|
| 0.706258 |    |    |    | P | P | P | P |
| 1.461501 |    |    |    | A | A |   | P |
| 1.8602   |    | *  |    | P | P | P | P |
| 2.382952 |    | *  | *  | P | P | P | P |
| 0.486516 |    |    |    | P | P | P | P |
| 0.464771 |    |    |    | P | P | P | P |
| 2.123881 |    |    | *  | P | P | P | P |
| 0.227069 |    |    |    | P | P | P | P |
| 1.093182 |    |    |    | P | P | P | P |
| 2.168375 |    |    | *  | P | P | P | P |
| 1.111336 | *  |    | *  | P | P | P | P |
|          |    |    |    | P | P | P |   |
| 0.701757 |    |    |    | P | P | P | A |
| 1.597092 |    | ** |    | P | P | P | P |
| 12.61176 |    | *  | ** | P | P | P | P |
| 7.79093  |    |    | ** |   |   | A | P |
| 2.399741 | *  |    | *  | P | P | P | P |
| 2.228687 |    |    | *  | P | P | P | P |
|          |    |    |    | A |   |   |   |
| 0.858235 |    |    |    | P | P | P | P |
| 0.391454 |    |    |    | P | P | P | P |
|          |    |    |    | P | A | A |   |
|          |    |    |    |   | P | A |   |
| 1.016656 | ** |    |    | P | P | P | P |
|          |    | ** |    |   | P | A |   |
| 0.310442 |    |    |    |   | P | A | A |
|          |    | *  |    | P | A |   |   |
| 0.696908 |    |    |    | P | P | P | A |
| 1.472572 | *  | ** | ** | P | P | P | P |
| 1.40056  |    |    | *  | P | P | P | P |
|          |    |    |    | P | A |   |   |
| 0.061917 |    |    |    |   | P |   | A |
| 0.65196  |    |    |    | P | P | P | A |
|          |    |    |    | P | P | A |   |
| 0.652262 | *  |    |    | P | P | P | P |
| 1.132844 | *  |    |    | P | P | M | P |
|          |    |    |    |   | A | A |   |
|          |    |    | *  | A | P | M |   |
| 0.665053 |    |    |    | P | P | A | A |
| 2.195877 | *  | ** | *  | P | P | P | P |

|          |    |    |   |   |   |   |   |
|----------|----|----|---|---|---|---|---|
|          |    |    |   |   | P | A |   |
|          |    |    |   |   | A |   |   |
| 1.803334 |    |    |   | P | P | P | P |
| 3.471281 |    | *  | * | P | P | P | P |
| 1.820748 |    | *  |   | P |   | P | P |
| 0.104067 |    |    |   | A |   | A | A |
|          |    |    |   | A | A |   |   |
| 0.448136 |    |    |   | P | P | P | P |
| 0.276472 |    |    |   |   | A | A | A |
|          | ** |    |   |   | P | A |   |
| 2.318808 |    |    | * | P | P | P | P |
| 0.159015 |    |    |   | P | P | A | A |
| 0.423648 |    |    |   | P | P | P | P |
| 0.824311 |    | *  |   | P | P | A | A |
|          |    |    |   |   | A |   |   |
| 0.331746 |    |    |   | P | A | P | A |
| 1.755903 |    | *  |   | P | P | P | P |
| 0.264565 |    |    |   | P | P | P | A |
| 0.437527 |    |    |   | P | P | P | P |
| 0.346483 |    |    |   | P | P | P | P |
| 0.356103 |    |    |   | P | P | A | A |
| 1.324949 |    | *  |   | P | P | P | A |
| 0.498667 |    |    |   | P | P | P | A |
| 0.342629 |    |    |   |   | A |   | A |
| 3.318442 |    | *  | * | P | P | P | P |
|          |    | *  |   | A |   | A |   |
| 0.740035 |    |    |   | A |   |   | A |
| **       |    |    |   | P |   | A |   |
|          |    | *  |   |   |   | P |   |
| 0.087564 |    |    |   |   | P |   | A |
| 0.576549 |    |    |   | P | A | A | M |
|          |    |    |   |   |   | A |   |
| 2.099288 |    | ** | * | P | P | P | P |
| 4.738187 |    |    | * |   |   |   | P |
| 1.889501 |    |    |   | A | P |   | P |
| *        |    |    |   | P | P | P |   |
| 0.028978 |    |    |   |   | P | A | A |
| 0.427596 |    |    |   | P | P | P | P |
| 1.212179 |    |    |   | P | P | P | P |
|          |    |    |   |   | A |   |   |



|          |    |    |    |    |   |   |   |
|----------|----|----|----|----|---|---|---|
| 0.801611 |    |    |    | P  | P | P | P |
|          |    | *  |    |    | A | M |   |
| 1.538452 |    | *  |    |    | M |   | P |
| 0.314598 |    |    |    | P  | P | P | P |
|          |    |    |    | P  |   |   |   |
| 0.593185 |    |    |    | P  | P | P | P |
|          |    |    |    | P  | A |   |   |
|          |    |    |    |    | A |   |   |
| 1.253799 |    |    |    |    | A |   | A |
| 0.20959  |    | *  |    |    | P | A | A |
| 0.189434 |    |    |    | P  | P | A | A |
| 13.67217 | *  |    | *  | ** | P | M | P |
|          |    | *  |    |    | A | P |   |
| 0.867878 |    |    |    |    | A |   | M |
| 0.058225 |    |    |    |    | P | M | A |
|          |    | *  |    |    | M | P |   |
| 14.423   |    |    |    | ** | P | P | M |
| 1.440976 | *  |    |    |    | P | P | P |
|          |    |    | *  |    | P | M |   |
| 1.559993 | ** |    |    |    | P |   | P |
| 22.95684 |    |    |    | ** |   |   | M |
|          | *  |    |    |    | M |   |   |
| 0.180621 |    |    |    |    | A |   | A |
| 0.497147 |    |    |    |    | P | P | P |
| 2.210147 |    |    |    | *  | A | P | M |
| 0.466172 |    |    |    |    | P | P | P |
| 0.518785 |    |    |    |    | P | P | P |
|          |    |    | ** |    |   |   |   |
|          |    |    |    |    | P | A |   |
|          |    | *  |    |    | P | P |   |
|          |    |    |    |    | A |   |   |
| 2.839925 |    |    |    | ** | A | A | P |
| 0.574303 | ** |    |    |    | P | P | A |
|          |    | ** |    |    |   | P |   |
|          |    |    |    |    | M | P |   |
|          |    |    |    |    | A |   |   |
| 3.61357  |    |    |    | *  |   |   | P |
|          |    | ** |    |    |   | A |   |
| 1.802571 | ** |    |    |    | P |   | P |
|          |    |    |    |    |   | A |   |
|          |    |    |    |    |   | A |   |

|          |    |    |    |    |   |   |   |
|----------|----|----|----|----|---|---|---|
| 1.400224 |    | *  |    | P  | P | P | A |
| 0.034789 |    |    |    | P  | P | P | A |
| 0.761564 |    |    |    | P  | P | A | A |
|          |    |    | ** |    |   | P |   |
| 0.474305 |    |    |    | P  | P | P | A |
| 0.671998 | *  |    |    | P  | P | A | A |
|          |    | ** |    |    | P |   |   |
| 0.451277 |    |    |    | P  | P | P | P |
| 1.957373 |    |    | *  | A  | P | P | P |
|          |    |    |    |    | P | A |   |
|          |    |    |    | P  | P | A |   |
| 0.611389 |    |    |    | P  | P | P | P |
|          |    |    | ** | P  |   | P |   |
| 0.458434 |    |    |    | A  | P | P | P |
| 0.679666 | *  |    |    | P  | P | P | P |
| 3.848206 |    |    | *  | *  | P | P | P |
| 0.662302 |    |    |    | P  | P | P | P |
| 2.890767 |    |    |    | ** | P | P | P |
|          |    |    |    |    | P | A |   |
| 2.018234 |    |    |    | *  |   | P | A |
| 0.596543 |    |    |    | M  | P | A | P |
| 2.929083 |    |    |    | ** | P | P | P |
|          | ** |    |    | M  |   |   |   |
| 0.092475 |    |    |    |    |   |   | A |
| 1.660386 |    |    | ** | P  | P | P | P |
| 2.07529  |    |    |    | *  | P | P | P |
| 0.267939 |    |    |    | P  | P | P | P |
| 6.171332 |    |    |    | *  |   | P | P |
| 0.27296  |    |    |    | P  | P | P | P |
| 2.292836 |    |    |    | *  |   | A | A |
|          |    |    |    |    | P | A |   |
| 1.834388 |    | *  |    | M  | P | P | P |
| 2.232274 |    |    |    | *  |   | A | P |
| 0.739879 | ** |    |    | M  | M |   | A |
| 1.958573 |    |    |    | P  | P | P | P |
| 4.495818 |    |    |    | *  | P | P | P |
| 0.686399 |    |    |    | P  | P | P | P |
| 0.074048 |    |    |    | P  | P | A | A |
| 2.927237 |    |    | *  | ** | P | P | P |
|          |    | ** |    |    | P |   |   |

|          |    |    |    |   |   |   |   |
|----------|----|----|----|---|---|---|---|
| 0.96005  |    |    |    | P | P | A | P |
| 0.167063 |    |    |    | P | P | P | A |
| 2.756925 |    |    | *  |   | P | P | P |
| 5.293475 |    |    | *  | P | P | P | P |
| 0.492885 |    |    |    | P | P | P | P |
| 0.28379  |    |    |    | P | P | P | P |
| 2.809323 |    |    | *  | A | P | P | P |
| 0.366294 | *  |    |    | P | A | A | A |
| 2.741112 |    |    | *  |   |   |   | P |
| 0.441494 |    |    |    | P | P | P | P |
| 0.400492 |    |    |    | P | P | P | P |
| 3.061828 |    |    | ** | P | P | P | P |
| 0.747688 |    | ** |    |   | A | P | A |
| 21.74929 |    |    | ** |   |   |   | P |
| 1.61963  |    | *  |    | P | P | P | P |
| 2.031137 |    |    | *  | P | P | P | P |
| 0.950809 |    |    |    | P | P | P | A |
| 2.070221 |    | ** | ** | P | P | P | P |
| 2.078572 |    |    | *  | P | P | P | P |
| 0.364587 |    |    |    | P | P | P | P |
| 2.075953 | *  | *  | *  | P | P | P | M |
| 0.94414  | ** |    |    | P | P | P | P |
|          |    | ** |    | P | P | M |   |
| 2.69929  |    |    | *  | A |   |   | P |
|          |    |    |    |   |   | A |   |
|          |    |    |    |   | A | A |   |
| 8.885694 | *  | *  | ** | P | P | P | P |
| 1.534949 |    | *  |    | P | A | P | P |
| 2.35569  |    |    | *  | P | P | P | P |
| 0.338218 | ** |    |    | P | P | A | A |
| 0.432001 |    |    |    |   | P | A | A |
| 2.654649 |    |    | *  |   | M | M | P |
| 3.162607 |    | *  | ** | P | P | P | P |
| 1.763886 |    |    |    | P | P | A | A |
| 1.434963 |    | *  |    | P | P | P | P |
|          | ** |    |    | P | A | P |   |
| 0.378414 |    |    |    | P | P | P | P |
| 0.203522 |    |    |    | P | P | P | A |
|          | ** |    |    | P | A | A |   |
| 0.398222 |    |    |    | P | P | P | P |

|          |    |    |    |   |   |   |   |
|----------|----|----|----|---|---|---|---|
| 0.351739 | *  |    |    | P | P | P | A |
|          |    |    |    |   |   | A |   |
| 2.557746 |    | ** | *  | P | P | P | P |
| 2.872359 |    | ** | ** | P | P | P | P |
| 0.161939 |    |    |    | P | P | P | A |
| 2.79698  |    | *  | ** | P | P | P | P |
| 0.625501 | *  |    |    | P | P | M | A |
| 2.381905 |    | *  | *  | P | P | P | P |
| 2.011169 |    | *  | *  | P | P | P | P |
| 1.567097 |    | *  |    | P | P | M | P |
| 0.676808 |    |    |    | P | P | M | A |
| 0.565019 |    |    |    | P | P | P | P |
| 2.8381   |    |    | *  | P | P | P | P |
| 1.791093 |    | *  |    | P | P | P | P |
| 0.949377 |    | *  |    | P | P | P | P |
|          |    | ** |    | P |   | P |   |
|          |    |    |    | A |   | A |   |
| 0.307899 | ** |    |    | P | P | P | P |
| 0.40339  |    |    |    | P | P | P | P |
|          |    | ** |    |   |   | P |   |
| 2.165735 |    |    | *  | P | P | P | P |
| 2.018685 |    |    | *  | P | P | P | P |
| 2.646172 | *  |    | *  | P | P | P | P |
|          | ** |    |    | M | A |   |   |
| 0.827341 |    |    |    | P | P | P | P |
| 0.270898 |    |    |    | P | P | P | P |
| 0.086806 | *  |    |    | P | P | A | A |
|          |    | *  |    | P | P | A |   |
| 0.490787 |    |    |    | P | P | P | P |
| 1.567919 |    | ** |    | P | P | P | P |
| 0.337231 |    |    |    | P | P | P | P |
| 0.195612 |    |    |    | P | A | M | A |
| 0.485741 |    |    |    | P | P | P | P |
| 2.14399  |    |    | *  | P | P | P | P |
| 2.224624 |    |    | *  | A | P | P | P |
| 1.248574 | *  |    |    | P | A |   | P |
| 0.396583 |    |    |    | P | P | P | P |
| 0.48822  |    |    |    | P | P | P | P |
| 2.981712 | ** |    | ** | P | P | P | P |
| 0.928433 |    |    |    | P | P | P | P |

|          |    |    |    |    |   |   |   |
|----------|----|----|----|----|---|---|---|
|          |    | *  |    |    | P |   |   |
| 6.021183 |    |    |    | *  |   | A | P |
| 0.335703 |    |    |    |    | P | P | P |
| 1.711888 |    |    | *  |    | P | P | P |
| 3.519348 |    |    | *  | *  | M | A | P |
| 1.608438 |    |    | *  |    | P | P | P |
| 1.016065 |    |    |    |    | P | P | P |
| 4.611306 | *  |    | ** | *  | P | P | P |
| 0.540954 |    |    |    |    | P | P | A |
| 2.759374 |    |    | ** | *  | P | P | P |
| 0.369233 |    |    |    |    | P | P | P |
| 1.655744 | ** |    | *  |    | P | P | P |
| 2.001651 |    |    |    | *  | P | P | P |
| 0.73953  |    |    |    |    | P | P | A |
|          |    |    |    |    | A |   |   |
|          |    | *  |    |    | A | P |   |
|          |    | *  |    |    | P | P | A |
| 1.056493 |    |    |    |    | P | P | A |
| 0.71671  |    |    |    |    | P | P | P |
|          |    | ** |    |    |   | P |   |
| 0.430691 |    |    |    |    | P | P | P |
| 2.638595 |    |    | *  | *  | P | P | P |
|          | ** |    |    |    | P |   |   |
| 2.118101 |    |    |    | *  | P | P | P |
| 1.850237 |    |    | *  |    | P | P | P |
| 0.156036 |    |    |    |    | P | P | P |
| 2.688638 |    |    |    | *  |   | A | A |
| 0.451721 |    |    |    |    | P | P | P |
| 2.763522 |    |    | ** | *  | P | P | P |
| 2.996107 |    |    | *  | ** | P | P | P |
| 2.411485 |    |    | ** | *  | P | P | P |
| 0.895559 |    |    | *  |    | P | P | P |
| 3.500267 |    |    | *  | *  | P | P | P |
| 4.11297  | *  |    | *  | *  | P | P | P |
| 3.199705 |    |    |    | ** | P | P | P |
|          | *  |    |    |    | M |   |   |
| 3.431977 |    |    |    | *  |   | P | P |
| 1.763406 |    |    | *  |    | M | P | M |
| 0.464005 |    |    |    |    | P | P | P |
| 2.31811  |    |    |    | *  | P | P | P |

|          |   |    |    |   |   |   |   |
|----------|---|----|----|---|---|---|---|
| 0.682447 |   |    |    | P | P | A | A |
| 0.325626 |   |    |    | P | P | P | P |
| 0.102126 |   |    |    |   | A |   | A |
| 1.66183  |   |    |    |   | A |   | P |
| 3.047464 |   |    | ** | P | P | P | P |
| 1.059428 |   |    |    | P | P | P | P |
| 0.438396 |   |    |    | P | P | P | P |
| 2.384662 |   |    | *  | P | P | P | P |
| 0.349219 |   |    |    | P | P | P | P |
| 1.099022 |   |    |    | P | P | A | A |
| 9.779569 |   |    | ** |   | A |   | P |
| 14.60371 |   |    | ** | P |   |   | P |
|          |   |    |    | A | A |   |   |
| 0.328551 |   |    |    | P |   |   | A |
| 0.51635  |   |    |    | P | P | M | A |
| 0.273339 |   |    |    | P | P | P | P |
| 0.367302 |   |    |    | P | P | P | P |
| 2.374821 |   |    | *  | P | P | P | P |
| 1.433981 |   | *  |    | P | P | P | P |
| 1.695408 |   |    |    | P | P | P | P |
| 5.65143  | * | ** | *  | P | P | P | P |
| 1.624832 |   | *  |    | P | P | P | P |
| 0.453022 |   |    |    | P | P | P | P |
| 2.025545 |   |    | *  | P | P | P | P |
| 3.585696 |   | ** | *  | P | P | P | P |
| 0.248384 |   |    |    | P | P | P | P |
| 1.117018 | * | *  |    | P | P | P | P |
|          | * |    |    | P | P | P |   |
|          |   |    |    |   | A | A |   |
| 0.423221 |   |    |    | P | P | P | P |
| 0.488934 |   |    |    | P | P | P | P |
| 3.323886 |   |    | *  | P | P | P | P |
| 4.335556 |   | *  | *  | P | P | P | P |
| 0.456932 |   |    |    | P | P | P | P |
| 0.455604 |   |    |    | P | P | P | P |
| 0.482308 |   |    |    | P | P | P | P |
| 0.444803 |   |    |    | P | P | P | P |
| 0.304867 |   |    |    | P | P | P | P |
| 0.208084 |   |    |    | P | P | P | A |
| 2.573056 |   | ** | *  | P | P | P | P |

|          |    |    |    |   |   |   |   |
|----------|----|----|----|---|---|---|---|
| 1.212795 |    | *  |    | P | P | P | P |
| 0.298598 |    |    |    | P | P | P | P |
| 0.283925 |    |    |    | P | P | P | P |
| 3.776273 | *  | *  | *  | P | P | P | P |
| 1.000682 |    |    |    | P | P | P | P |
| 2.011353 |    |    | *  | P | P | P | P |
|          |    |    |    |   |   | A |   |
| 1.338705 |    |    |    | P | P | P | M |
|          |    |    |    | P | P | P |   |
| 0.344576 |    |    |    | P | P | P | P |
| 2.326543 |    | *  | *  | P | P | P | P |
| 0.633208 | *  |    |    | P | A | P | A |
| 0.83994  |    |    |    | P | P | P | P |
| 2.21568  |    |    | *  | P | P | P | P |
| 0.122317 |    |    |    | P | P | P | P |
| 0.175327 |    |    |    | M | P | P | A |
| 2.101089 |    |    | *  | P | P | P | P |
| 3.088394 |    | *  | ** |   | P | A | P |
| 2.964151 |    |    | ** |   |   |   | P |
|          |    |    |    |   |   | A |   |
|          |    |    |    | M | A | A |   |
| 1.444201 |    |    |    | A | P | P | P |
|          |    | *  |    |   |   | P |   |
| 1.667969 | *  |    |    | P | P | P | A |
| 2.188942 |    |    | *  | P | P | P | P |
| 3.326245 |    |    | *  | P | P |   | P |
| 0.473225 | *  |    |    | P | P | P | P |
| 3.910002 |    |    | *  |   |   |   | P |
| 1.880441 |    |    |    | P | P | A | P |
| 0.268848 |    |    |    | P | P | P | P |
| 2.198002 | *  | *  | *  | P | A | P | P |
| 2.892972 | ** | ** | ** | M | P | P | M |
| 0.328651 |    |    |    | P | P | P | P |
| 0.202131 |    |    |    | P | P | P | P |
| 0.830385 | *  |    |    | P | P | P | A |
|          | ** |    |    | P |   |   |   |
| 0.477192 |    |    |    | P | P | P | P |
| 2.278961 |    | *  | *  | P | P | P | P |
| 3.093597 |    |    | ** | P | P | P | P |
| 2.697834 |    |    | *  |   | A |   | P |

|          |    |    |    |   |   |   |   |
|----------|----|----|----|---|---|---|---|
|          |    |    |    | P | P | P |   |
| 0.503775 | *  |    |    | P | P | A | A |
| 3.381105 |    | *  | *  | A |   | P | P |
| 0.963259 |    |    |    | P | P | P | P |
| 2.864198 | *  | *  | ** | P | P | P | P |
| 5.27936  |    | *  | *  | P |   | P | P |
|          |    |    |    |   | P | A |   |
| 0.430463 |    |    |    | P | P | P | P |
| 0.74961  |    |    |    | P | P | P | P |
| 0.095295 |    |    |    | P | P | A | A |
|          |    |    |    | P | P | A |   |
| 1.059452 |    |    |    | P | P | P | P |
| 2.107891 |    |    | *  |   |   |   | P |
|          |    |    |    |   |   | A |   |
| 1.630042 | *  |    |    | P | P | P | P |
| 1.182509 | ** |    |    | P | A |   | A |
|          |    |    |    | P | P | A |   |
| 0.252235 |    |    |    | P | P | P | P |
| 0.81788  | *  | *  |    | P | P | P | A |
| 0.422671 |    |    |    | P | P | P | P |
| 0.478744 |    |    |    | P | P | P | P |
| 1.137289 |    | *  | ** | P | P | P | P |
|          |    | *  |    |   | P | A |   |
| 0.438504 |    |    |    |   |   |   | A |
| 0.669687 | *  |    |    | P | P | P | P |
| 1.901776 | *  |    |    | P | P | A | A |
| 1.104018 |    |    |    | M | A | P | A |
| 0.035019 |    |    |    | A | P | A | A |
| 0.346996 |    |    |    | P | P | P | P |
| 1.437061 | *  | ** |    | P | P | P | P |
| 0.337678 |    |    |    | P | P | P | P |
| 0.774995 |    |    |    | P | P | P | P |
|          |    | *  |    |   | M |   |   |
| 2.787576 | ** |    | *  | P | P | P | P |
| 0.467001 |    |    |    | P | P | P | P |
| 0.926414 |    |    |    | A |   | A | A |
| 0.153314 |    |    |    | P | P | A | A |
| 0.494412 |    |    |    | P | P | P | P |
|          |    |    |    |   |   | A |   |
| 0.306062 |    |    |    | P | P |   | A |



|          |    |    |    |   |   |   |   |
|----------|----|----|----|---|---|---|---|
| 1.355647 |    |    |    | P | P | P | P |
| 0.838896 |    |    |    | P | P | P | P |
| 3.330414 |    |    | *  | P |   | P | P |
| 0.353761 |    |    |    | P | P | P | P |
| 0.798642 |    |    |    | P | P | P | P |
| 0.947562 |    | ** |    | P | P | P | P |
|          |    |    |    | A | P | A |   |
| 5.263842 |    |    | *  |   |   |   | P |
|          |    | ** |    |   |   | P |   |
| 3.851873 |    | *  | *  | P | P | P | P |
| 2.404245 |    | *  | *  | P | P | P | P |
| 1.573752 |    | *  |    | P | P | P | P |
| 2.070314 |    |    | ** |   | P | A | P |
| 0.981046 |    |    |    | A | A | A | P |
| 0.464223 |    |    |    | P | P | P | P |
| 0.151794 |    |    |    |   |   | A | A |
| 0.403276 |    |    |    | P | P | P | P |
| 1.227142 |    | ** |    | P | P | P | P |
| 2.437647 |    |    | *  | P | P | P | P |
| 0.270206 |    |    |    | P | P | P | P |
| 0.589574 | ** |    |    | P | P | A | A |
| 0.48922  | ** |    |    | P | P | P | P |
| 0.368756 |    |    |    | P | P | P | P |
| 0.463076 |    |    |    | P | P | P | P |
| 0.862614 |    |    |    | P | P | A | P |
|          | *  |    | *  | M | A | P |   |
| 0.085076 |    |    |    | P | P | P | A |
| 0.884046 |    | ** |    | P | P | P | A |
| 0.38232  |    |    |    | P | P | P | P |
| 1.803307 |    | *  |    | A | P | A | A |
|          | ** |    |    | M |   |   |   |
| 2.602893 | *  |    | *  | P | P | P | P |
| 0.264899 | *  |    |    | P | P | P | A |
| 1.680961 |    |    |    | P | P | A | P |
| 0.674017 |    |    |    | P | A | P | A |
| 3.043835 | *  | ** | ** | P | P | P | P |
| 1.527568 |    | ** |    | P | A | P | A |
|          |    |    |    | P | A |   |   |
| 1.047088 |    | *  |    | P | P | A | A |
| 1.399718 |    |    |    | P | P | P | P |

|          |    |    |    |    |   |   |   |   |
|----------|----|----|----|----|---|---|---|---|
| 1.286632 |    |    | *  |    | P | P | P | P |
| 0.443376 |    |    |    |    | P | P | P | P |
| 50.1901  |    |    |    | ** |   |   |   | P |
| 2.777408 |    |    |    | *  | P | P | P | P |
|          | ** |    | *  |    | P | P | P |   |
| 0.367807 |    |    |    |    | P | P | P | P |
| 0.479388 |    |    |    |    | P | P | P | P |
| 1.625506 |    |    | *  |    | P | P | P | P |
| 0.409183 |    |    |    |    | P | P | P | P |
| 0.493911 |    |    |    |    |   |   | A | A |
| 5.701462 |    | *  | ** | *  | P | P | P | P |
| 6.184587 |    |    | *  | *  | P | P | P | P |
| 2.540666 |    |    | *  | *  | P | P | P | P |
| 2.321754 |    |    |    | *  | P | P | P | P |
|          |    |    | *  |    |   | M | P |   |
|          | ** |    |    |    | P |   |   |   |
| 2.139122 | *  |    | *  | *  | P | P | P | P |
| 0.951806 | *  |    |    |    | P | P | P | P |
|          |    |    |    |    |   |   | A |   |
| 6.128024 |    |    | ** | *  | P | P | P | P |
| 5.787027 | ** |    | ** | *  | P | P | P | P |
| 2.295552 |    |    |    | *  | M |   |   | P |
| 0.302187 |    |    |    |    | P | P | P | P |
| 0.875545 |    |    |    |    | P | P | P | P |
| 3.987949 |    | *  |    | *  | P | P | P | P |
|          |    | *  | ** |    | P | P | P |   |
|          |    |    | ** |    | P |   | A |   |
|          |    |    | *  |    | P | M | P |   |
|          |    |    |    |    |   |   | P |   |
| 1.479319 |    |    |    |    | A |   | A | A |
| 2.359685 |    |    |    | *  |   |   |   | P |
|          |    |    | ** |    |   |   | P |   |
| 0.179418 | *  | *  |    |    | P | P | P | M |
|          |    |    |    |    |   | A |   |   |
| 0.65451  |    |    |    |    | P | P | P | P |
| 0.05866  |    |    |    |    | P | P |   | A |
| 4.066861 |    |    |    | *  | A |   | P | P |
| 1.128414 |    | *  | *  |    | P | P | P | P |
| 1.531746 |    | ** | ** |    | P | P | P | P |
| 1.006457 | *  | ** | ** |    | P | P | P | P |

|          |    |    |    |    |   |   |   |   |
|----------|----|----|----|----|---|---|---|---|
| 2.145661 | *  |    |    | *  | P | P | P | P |
| 1.047938 |    |    | ** |    | A |   | P | A |
| 2.609002 |    |    |    | *  |   |   |   | P |
| 0.884444 |    | *  |    |    |   | P |   | P |
|          |    |    |    |    | P | P | A |   |
|          |    |    |    |    |   |   | A |   |
| 1.467294 |    |    |    |    | P | P | A | P |
| 0.376406 |    |    |    |    | P | P | P | P |
|          | ** |    | ** |    | P |   | P |   |
| 7.476961 | ** | ** | ** | ** | P | P | P | P |
| 0.433584 |    |    |    |    | P | P | P | P |
| 0.491468 |    |    |    |    | P | P | P | P |
| 2.281262 |    |    |    | *  | P | P | P | P |
|          |    | ** |    |    | P | P |   |   |
| 0.765569 |    |    | *  |    | P | P | P | P |
|          |    | ** |    |    |   | M |   |   |
| 1.365685 | *  |    |    |    | P | P | P | P |
| 4.850369 | *  | *  | *  | *  | P | P | P | P |
| 0.312931 |    |    |    |    | P | P | P | A |
|          |    | *  |    |    | P | P | P |   |
| 1.689335 |    |    | ** |    | P | P | P | P |
| 1.790933 |    |    |    |    | P | P | P | P |
|          | ** |    |    |    | P | A |   |   |
|          |    |    |    |    | P |   | A |   |
| 0.33387  |    |    |    |    | P |   | M | A |
|          |    |    |    |    | P | P | P |   |
| 2.100534 |    |    |    | *  | P | P | P | P |
| 8.517386 | ** |    | *  | ** | P |   | P | P |
|          |    |    |    |    |   | A |   |   |
| 2.600835 |    |    | *  | *  | P | P | P | P |
| 0.243479 |    | *  |    |    |   | P | A | A |
| 2.248748 |    |    | *  | *  | P | P | P | P |
| 2.350991 |    |    |    | *  |   |   |   | M |
| 0.785184 | *  |    |    |    | P | P | P | P |
| 2.941074 |    |    | *  | ** | P | P | P | P |
| 4.776593 |    |    | *  | *  | P | P | P | P |
| 3.332789 |    |    |    | *  |   |   |   | M |
| 1.700778 |    |    |    |    | P | P | A | P |
| 1.013441 |    |    |    |    | P | P | P | P |
| 2.212719 |    |    | *  | *  | P | P | P | P |

|          |    |    |   |   |   |   |   |
|----------|----|----|---|---|---|---|---|
| 0.618797 |    | *  |   |   | P | P | A |
|          |    |    |   | P |   | A |   |
| 0.388065 | *  |    |   | P | P | P | P |
|          |    |    |   | P | A | A |   |
| 3.797335 |    |    | * | P | P | A | P |
| 0.271351 |    |    |   | P | P | P | P |
| 1.706139 |    | *  |   | P | P | P | P |
| 1.078635 |    |    |   | P | P | M | A |
| 0.078451 |    |    |   | P | M |   | A |
| 1.928611 |    | *  |   | P |   | P | P |
| 2.060021 |    |    | * | P | A | P | P |
| 2.373566 |    |    | * | P | P | P | P |
|          |    | *  |   |   | P |   |   |
| 2.291008 |    |    | * | P |   |   | P |
| 1.156381 |    |    |   | P | P | A | P |
| 2.348193 |    |    | * | P | P | P | P |
|          |    |    |   |   | P | A |   |
|          |    | *  |   | P | P | P |   |
|          | *  | ** |   | P |   | M |   |
| 0.813122 |    | *  |   | P | A | P | P |
|          |    |    |   |   |   | A |   |
| 1.768852 |    |    |   | P | P | P | P |
| 0.460013 |    |    |   | P | P | P | A |
| 3.404033 |    | *  | * | P | P | P | P |
| 2.710104 |    |    | * | P | P | A | P |
| 0.356354 |    | *  |   | A | M | M | A |
|          |    |    |   | A |   |   |   |
| 0.518546 |    | ** |   | M | P |   | A |
| 0.484144 |    |    |   | P | P | P | P |
| 0.870878 | *  | *  |   | P | P | P | P |
| 1.004217 |    |    |   | P | P | P | M |
|          |    |    |   | P | A | A |   |
|          |    | *  |   |   |   | P |   |
| 4.386682 | *  | ** | * | P | P | P | P |
|          | ** |    |   | P | P | P |   |
| 2.271904 | *  |    | * | P |   |   | P |
| 0.486109 |    |    |   | P | P | P | A |
| 2.494279 |    |    | * | P | P | P | P |
| 0.634664 |    |    |   | P | P | P | A |
|          |    | *  |   | P | P | A |   |

|          |    |    |    |    |   |   |   |   |
|----------|----|----|----|----|---|---|---|---|
|          |    |    |    |    | M | A |   |   |
| 0.106408 |    |    |    |    |   |   |   | A |
| 2.312301 |    |    |    | *  | P | P | P | P |
|          |    |    |    |    | P | A | P |   |
| 0.537068 |    |    | *  |    | P | M | P | A |
| 2.521977 |    |    |    | *  |   | P |   | P |
|          | *  |    |    |    | P | A | A |   |
| 0.297713 |    |    |    |    |   | P | A | A |
| 2.49969  | ** |    | *  | *  | P | P | P | P |
| 1.013592 |    |    |    |    | P | P | P | P |
| 1.801062 | *  |    |    |    | P | P | M | P |
| 2.163396 |    |    |    | *  | M | P | P | A |
| 0.491079 | *  |    |    |    | P | P | P | M |
|          |    |    |    |    | A |   | A |   |
| 2.388132 |    |    |    | *  | P | P | P | P |
|          | *  |    |    |    | P | P | P |   |
|          |    | *  |    |    |   |   |   |   |
|          |    | ** |    |    |   | P |   |   |
| 8.314333 |    |    | ** | ** |   |   | P | P |
|          |    | *  | ** |    | P | P | A |   |
| 0.581433 |    |    |    |    | P | P | P | P |
| 0.518533 | ** |    |    |    | P | P | P | P |
| 0.273295 |    |    |    |    |   |   |   | A |
|          |    |    |    |    |   | A |   |   |
| 0.165327 |    |    |    |    | P | P |   | A |
|          |    |    |    |    |   |   | A |   |
| 1.06549  |    |    |    |    | P | P | P | P |
| 1.587789 |    |    |    |    | P | P | P | P |
|          |    |    |    |    | P |   |   |   |
|          |    |    |    |    | A |   |   |   |
| 0.562849 | *  |    |    |    | P | P | A | A |
|          | *  | ** |    |    | P | P | A |   |
| 1.150294 |    |    | *  |    | P | P | P | P |
|          | ** | *  |    |    | P | P |   |   |
| 1.201697 |    |    |    |    |   | P | P | M |
|          |    |    |    |    |   |   | A |   |
|          |    |    |    |    |   |   | A |   |
| 2.581007 |    |    |    | *  | P | P | A | P |
| 0.311349 |    |    |    |    | M | P | P | A |
| 1.788862 |    |    |    |    | P | P | P | P |
| 6.745681 |    |    | *  | ** | P | P | P | P |

|          |    |   |    |   |   |   |   |
|----------|----|---|----|---|---|---|---|
| 0.131222 |    | * | *  | P | P | P | A |
|          |    |   |    | P | P | A |   |
| 0.315016 |    |   | ** | P |   | A | A |
| 0.406419 |    |   |    | P | P | P | M |
| 2.165757 |    |   | *  | P | P | A | P |
| 0.363543 |    |   |    | P | P | P | A |
| 0.028863 |    |   |    | P | P | P | A |
| 0.472586 |    |   |    | P | P | P | P |
| 1.78722  |    | * |    | P | P |   | P |
| 0.094777 |    |   |    |   |   |   | A |
|          |    |   | *  | A |   | P |   |
| 1.734945 |    |   | *  | P | P | P | P |
|          |    |   |    |   |   | A |   |
| 1.519733 | *  |   |    | P | P | P | P |
| 0.445875 |    |   |    | P | P | P | P |
|          |    |   |    | P | P | A |   |
|          |    |   |    |   | A | A |   |
| 0.070312 |    |   |    |   | P |   | A |
|          | *  |   |    | P |   |   |   |
| 0.155515 |    |   |    | P | P | A | A |
| 0.758586 |    |   |    | P | P | P | P |
| 0.55729  |    |   |    | P | A | M | A |
| 0.871945 |    |   |    | P | P | P | A |
| 0.383927 |    |   |    | P | P | P | P |
| 0.497461 | *  |   |    | P | P | P | A |
|          |    |   |    | A |   | A |   |
|          |    |   |    |   |   | A |   |
| 4.141881 |    |   | *  | A | P | P | P |
| 0.509046 |    |   |    | P | P | P | P |
|          |    |   |    |   |   | A |   |
|          |    |   |    |   | A | A |   |
| 0.654256 |    |   |    | P | A | A | A |
| 0.541318 |    |   |    | P | P | M | A |
| 0.200385 |    |   |    | P | P | P | P |
| 0.415163 |    |   |    | P | P | P | P |
| 0.961812 | ** |   |    | P | P | P | A |
|          |    |   |    |   | A |   |   |
| 0.251573 |    |   |    |   | A |   | A |
| 0.424308 |    |   |    | P | P | P | P |
| 0.259376 |    |   |    | P | P | P | A |

|          |    |    |    |   |   |   |   |
|----------|----|----|----|---|---|---|---|
|          |    |    |    | M | P | A |   |
| 8.376514 |    | ** | ** | P | P | P | P |
| 0.392914 |    |    |    | P | P | P | P |
| 0.951863 |    |    |    | P | A | A | A |
|          |    |    |    |   |   | A |   |
| 2.993735 | *  |    | ** | P | P | P | P |
| 1.476327 |    |    |    | A | A |   | P |
| 7.519135 |    | *  | ** | A | A | M | P |
| 1.322978 |    |    |    | P | P | A | A |
| 0.79307  |    |    |    | P | P | P | P |
| 0.356262 |    |    |    | P | P | P | A |
| 30.24619 |    |    | ** | A | P |   | M |
|          |    | *  |    |   | P | A |   |
| 1.525216 |    |    | ** | P | P | P | P |
| 0.441529 |    |    |    | P | P | P | A |
|          |    |    |    |   |   | A |   |
|          |    | *  |    |   | P |   |   |
| 0.735627 |    |    |    | P | P | P | P |
| 0.107013 |    |    |    | P | P | P | A |
| 0.763923 |    | *  |    | P |   | A | A |
| 3.618972 |    | *  | *  | P | P | P | P |
| 1.396599 |    |    |    | P | P | P | P |
| 0.923743 |    |    |    | P | P | P | P |
| 0.458578 |    | *  |    | P | P | P | P |
| 0.081443 |    |    |    |   | P | P | A |
| 2.613925 |    |    | *  | P | P | A | P |
|          | *  |    |    | P |   |   |   |
| 17.61319 |    |    | ** |   |   | P | P |
|          | ** | *  |    | P | P | P |   |
|          |    |    |    |   | A |   |   |
| 0.057652 |    |    |    | M | P | P | A |
| 0.394362 |    |    |    | P | P | P | A |
|          |    | ** |    | A |   | P |   |
| 0.450681 |    |    |    | P | P | P | P |
| 0.494026 |    |    |    | P | P | P | P |
| 2.725197 |    |    | *  |   |   |   | P |
| 2.025553 |    |    | *  | P | P | M | A |
| 0.646409 |    |    |    | P | P | P | P |
| 11.85555 |    |    | ** | A | P | P | P |
| 12.06994 | *  | *  | ** | P | P | P | P |

|          |    |    |    |   |   |   |   |
|----------|----|----|----|---|---|---|---|
| 4.678745 |    |    | *  |   | A |   | P |
|          |    |    |    | P |   | A |   |
|          |    | *  |    | A | P |   |   |
| 3.904942 |    |    | *  |   |   |   | M |
| 0.796495 |    |    |    | P | P | P | P |
| 1.116493 |    |    |    | P | P | P | M |
| 0.090868 | ** |    |    | P | P | A | A |
|          |    |    |    | P | P | A |   |
| 0.702874 |    |    |    | P | P | P | P |
|          |    |    |    | P | P | A |   |
| 51.09869 |    | *  | ** |   |   | P | P |
|          |    | *  |    |   | P |   |   |
|          |    |    |    |   | M | A |   |
| 0.134506 |    | *  |    | P | P | P | A |
| 0.572578 |    |    |    | P | P | P | P |
|          |    |    |    | A | A | A |   |
|          |    |    |    | A | P | A |   |
|          |    |    |    | A |   | A |   |
|          |    | *  |    |   |   | M |   |
|          |    |    |    |   |   | A |   |
| 0.449214 |    |    |    | P | P | P | P |
| 3.029035 |    |    | ** |   |   |   | P |
| 0.315606 |    |    |    | P | P | P | A |
| 0.560359 | *  |    |    | P | P | P | P |
|          |    |    |    |   |   | A |   |
| 0.472616 |    |    |    | P | P | P | P |
| 0.8366   |    |    |    | P | P | P | P |
| 0.610227 |    |    |    | P | P | P | A |
| 0.752331 |    | *  |    | M | A | A | M |
| 0.131227 |    |    |    |   |   |   | A |
| 2.866119 |    | *  | ** |   | P | P | P |
| 0.534113 |    | ** |    |   | P | A | A |
| 0.911833 | *  |    |    | P | P | P | P |
|          |    | *  |    |   | M |   |   |
| 1.277411 | ** |    |    | P | P | P | A |
| 1.713092 |    |    |    | P | P | P | P |
| 0.889471 | *  |    |    | P | P | A | A |
| 0.968513 | *  |    |    | P | P | P | P |
|          |    |    |    | A | A | A |   |
| 0.917739 | *  |    |    | P | P | P | M |



|          |    |    |    |    |   |   |   |   |
|----------|----|----|----|----|---|---|---|---|
| 1.447334 |    | *  |    |    | P | P | P | P |
|          | *  |    |    |    | P | P | A |   |
| 3.075658 |    |    |    | ** | P | P | P | P |
| 2.679133 |    |    |    | *  | P |   | M | P |
|          |    |    |    |    | P | P | A |   |
|          |    |    |    |    | P | P | P |   |
| 0.802606 |    |    |    |    | P | P | P | A |
| 1.388028 | ** |    |    |    | P | P | P | A |
| 2.147082 |    |    |    | *  |   |   | A | A |
| 4.155042 | ** | *  | ** | *  | P | P | P | P |
|          | *  |    |    |    | P |   |   |   |
| 0.541444 |    |    |    |    | P | P | P | P |
| 0.250601 |    |    |    |    | A | A | A | A |
| 0.608212 |    |    |    |    | P | A | A | M |
| 2.786551 | *  |    |    | *  | P | P | A | P |
| 2.668538 |    |    |    | *  | A | P | A | A |
| 1.41068  |    |    |    |    | P | P | P | P |
| 0.379404 |    |    |    |    | P | P | P | A |
|          |    | ** |    |    | P | P | A |   |
| 2.15705  |    |    |    | *  | P | P | P | P |
| 0.570372 |    |    | *  |    | P | P | P | P |
| 6.581076 | *  |    | *  | ** | P | P | P | P |
| 1.024905 | *  |    |    |    | P | P | P | P |
| 3.212348 |    |    |    | ** |   |   | A | P |
|          |    |    | ** |    | P | P | P |   |
| 0.216169 |    |    |    |    | P | P | P | A |
| 0.371958 |    |    |    |    | A | P | P | A |
| 0.769965 |    |    |    |    | P | P | P | P |
| 2.757034 |    |    | *  | *  | P | P | P | P |
|          |    |    |    |    | A |   | A |   |
| 1.63612  |    |    | *  |    | P | P | P | P |
| 0.444121 |    |    |    |    | P | P | P | P |
|          | *  |    |    |    | P |   | P |   |
|          | *  |    |    |    | M |   |   |   |
| 3.603355 |    |    |    | *  |   |   |   | P |
| 0.969696 |    |    |    |    | P | P | P | P |
| 0.657081 |    |    |    |    | P | P | P | P |
| 0.141131 |    |    |    |    | P | P | A | A |
| 0.249998 | ** |    |    |    | P |   | P | A |
| 2.237129 |    |    |    | *  | P | P | P | P |

|          |    |    |    |   |   |   |   |
|----------|----|----|----|---|---|---|---|
| 0.854103 | ** |    |    | P | P | P | A |
| 1.819255 |    | *  |    | P | P | P | P |
|          |    |    |    | P | A | A |   |
| 0.198836 |    |    |    | P |   |   | A |
| 0.297505 |    | ** |    |   | P |   | A |
| 2.575413 |    |    | *  | A |   | A | P |
| 0.546095 |    |    |    | P | P | P | A |
| 2.618063 |    | *  | *  | P | P | P | P |
| 0.818896 | *  |    |    | P | P | A | A |
|          |    | ** |    |   |   | P |   |
| 0.130713 |    |    |    |   |   |   | A |
| 1.931653 | *  |    |    | P | P | P | P |
| 2.006343 |    |    | *  | P | P | P | A |
| 0.473532 |    |    |    | P | P | P | P |
| 2.834701 |    | ** | *  | P | P | M | P |
| 1.763943 | ** | *  |    | P | P | P | P |
|          |    |    |    |   |   | A |   |
|          | *  |    |    | M | A |   |   |
| 2.045447 |    |    | *  | P | P | P | P |
| 2.915115 |    |    | ** | P |   |   | P |
| 1.587566 | *  |    |    | P | M | A | P |
|          |    | *  |    |   | M |   |   |
| 0.291442 |    |    |    | P | P | P | A |
|          |    |    |    | A |   |   |   |
| 2.632635 |    |    | *  |   | P | P | M |
| 0.92473  | *  |    |    | P | P | P | M |
| 0.331127 |    |    |    |   |   |   | A |
| 1.734289 |    |    |    | P |   | A | P |
| 0.417759 |    |    |    | P | P | P | P |
| 1.345744 |    |    |    | P | A | P | P |
| 1.188279 | *  |    |    | P | P | P | P |
| 0.843519 | *  |    |    | P | P | P | P |
|          |    |    |    | A | P |   |   |
| 4.53354  |    |    | *  | P | P | P | P |
| 2.275947 |    |    | *  | P | P | P | A |
| 0.610085 | *  | *  |    | P | P | P | P |
| 2.092013 | *  |    | *  | P | P | P | P |
| 1.795475 | *  | *  |    | P | P | P | P |
|          |    |    |    | P |   | A |   |

|          |    |    |    |   |   |   |   |
|----------|----|----|----|---|---|---|---|
|          | *  |    |    | M | P | A |   |
| 2.222507 |    |    | *  | P | P | P | P |
| 0.495518 |    |    |    | P | P | A | A |
| 0.423646 | *  |    |    | P | P | P | P |
|          |    |    |    | A | P | A |   |
| 0.09545  |    |    |    | P | P | P | A |
|          |    | *  |    |   | M |   |   |
| 0.474874 |    |    |    | P | P | P | P |
| 2.111749 |    |    | *  | P | P | P | P |
|          |    |    |    | A | P |   |   |
| 1.763325 | *  |    |    | P |   | P | M |
|          | *  |    |    | P | P | P |   |
|          |    | *  |    |   | P |   |   |
| 0.041195 | *  |    |    | P | P | A | A |
|          |    |    |    |   |   | A |   |
|          |    |    |    | P | P | A |   |
|          | *  |    |    | P |   |   |   |
|          | *  |    |    | M |   |   |   |
|          | ** |    |    | P |   |   |   |
| 1.615793 |    |    |    | P | P | A | A |
|          | *  |    |    | P |   |   |   |
| 2.095399 |    |    | *  | P | A |   | P |
|          | *  | ** |    | P | P |   |   |
| 1.362564 |    |    |    | P | P | P | P |
|          |    |    | ** |   |   | M |   |
| 1.319642 |    |    |    |   |   | A | A |
|          |    |    |    |   |   | A |   |
|          | ** |    |    | P | A |   |   |
|          |    | ** |    | P | P | A |   |
| 4.244169 |    |    | *  | P | A | P | P |
| 0.934493 |    |    |    | M | P | P | P |
|          | *  |    |    | P |   |   |   |
|          |    |    | *  |   |   | M |   |
| 0.724531 |    |    |    | P | P | P | P |
| 1.473761 | *  |    |    | P | P | P | P |
| 2.096437 |    |    | *  | P | P | P | P |
| 0.383049 | *  |    | *  | P | P | P | A |
| 0.435607 |    |    |    | P | P | P | P |
|          |    | ** |    | P | P |   |   |
| 1.724145 |    | ** |    | P | P | P | A |

|          |    |    |    |    |   |   |   |   |
|----------|----|----|----|----|---|---|---|---|
|          |    |    |    |    | P | P | P |   |
| 1.912916 |    |    | *  |    | P | M | P | P |
|          |    |    |    |    | P | A | A |   |
| 1.004832 | *  |    |    |    | P | P | P | A |
| 0.493791 |    |    |    |    | P | P | P | P |
| 3.129172 | *  | *  | ** | ** | P | P | P | P |
| 0.480822 |    |    |    |    | P | P | P | P |
| 0.124731 |    |    |    |    |   |   |   | A |
| 0.193137 |    |    |    |    | P | P | P | P |
|          |    |    |    |    | P |   | A |   |
| 1.970427 |    | *  |    |    | P | P | P | P |
| 3.342818 |    | *  | *  | *  | P | P | P | P |
| 2.626971 |    |    | *  | *  | P | P | P | P |
| 0.462691 |    |    |    |    | P | P | P | P |
|          |    |    |    |    | A | A |   |   |
| 0.717592 |    |    |    |    | P | P | P | P |
| 2.846825 |    |    |    | ** | P | P | P | P |
| 2.979842 |    |    |    | ** | P | P | P | P |
| 0.439458 |    |    |    |    | P | P | P | P |
| 0.260598 | *  |    |    |    | P | P | P | A |
| 3.085093 |    |    |    | ** | P | P | P | P |
| 0.570039 | *  |    |    |    | P | P | P | A |
|          | ** |    |    |    | P | M | P |   |
| 2.556439 |    |    |    | *  | P | P | P | P |
| 0.912657 |    |    |    |    | P | P | P | P |
| 2.85374  |    |    |    | ** | P | P | A | M |
| 0.076373 |    |    |    |    |   | A | A | A |
| 2.953718 |    |    |    | ** | P | M | P | P |
|          |    |    |    |    | A | M | A |   |
| 0.103338 |    | *  |    |    |   | P | M | A |
| 1.094211 |    |    |    |    | P | P | A | P |
|          |    |    |    |    |   | A | M |   |
| 2.675631 |    |    |    | *  | A |   |   | P |
|          |    | ** |    |    |   | P |   |   |
| 3.345431 |    |    |    | *  | P | P | P | P |
|          |    |    |    |    |   | A | A |   |
| 0.615586 |    |    |    |    | P | P | P | P |
| 0.436485 |    |    |    |    | P | P | P | P |
| 0.303723 |    |    |    |    |   | A | P | A |
| 2.181094 |    |    |    | *  | P | P | P | P |

|          |    |    |    |   |   |   |   |
|----------|----|----|----|---|---|---|---|
| 0.830304 |    |    |    | P | P | P | P |
| 0.773947 |    |    |    | P | P | A | A |
| 2.962468 |    |    | ** | P | P | P | P |
| 0.638284 |    |    |    | P | P | P | P |
|          | *  |    |    | M |   |   |   |
| 0.519624 |    |    |    | P | P | P | P |
| 0.272123 |    |    |    | P | P | P | A |
|          | ** |    |    |   |   | A |   |
|          |    |    |    | P | A |   |   |
|          |    |    |    |   |   | A |   |
| 31.43482 |    |    | ** | P | A | P | P |
| 2.374323 |    | ** | *  | P | P | P | P |
|          |    | *  |    |   | P | P |   |
| 0.436063 |    |    |    | P | P | P | P |
| 0.286555 |    |    |    | M | P | A | A |
| 1.245882 |    |    |    | P | P | P | P |
| 2.520805 |    |    | *  |   |   |   | A |
| 2.144212 |    |    | *  | P | P | A | A |
| 0.723374 |    |    |    | P | P | P | P |
| 2.622793 |    |    | *  | P | P | P | P |
| 1.644696 |    | *  |    | P | P |   | A |
| 0.256878 |    |    |    | P | P | P | A |
| 0.265121 |    |    |    | P | P | P | P |
| 0.487256 |    |    |    | P | P | P | P |
| 0.302207 |    |    |    | P | P | P | A |
|          |    |    |    |   | A |   |   |
| 1.181026 |    |    |    | P | P | A | A |
| 3.804396 | *  |    | *  | P | P | P | P |
| 1.13561  |    |    |    | P | P | P | P |
| 2.801763 |    |    | *  |   |   |   | P |
| 2.921458 |    | *  | ** | P | P | P | P |
| 0.244086 |    |    |    | P | P | P | A |
|          |    |    |    |   | A | A |   |
|          |    |    |    | M | P | A |   |
| 0.561755 | *  |    |    | P | P | P | P |
| 0.41273  |    |    |    | P | P | P | P |
| 0.480997 |    |    |    | P | P | P | P |
| 0.791288 | *  |    |    | P | P | P | P |
| 1.252149 |    |    |    | P | P | P | P |
| 0.068796 |    |    |    |   |   |   | A |

|          |    |    |    |   |   |   |   |
|----------|----|----|----|---|---|---|---|
|          | *  |    |    | P |   |   |   |
| 0.383146 |    | ** |    | P | P | P | A |
| 0.397161 |    |    |    | P | P | P | M |
| 2.425592 |    |    | *  |   | A |   | P |
| 0.326005 |    |    |    | P | P | P | A |
| 2.596698 |    | *  | *  | P | P | P | P |
| 0.92101  |    |    |    | P | P | A | P |
| 3.111895 |    |    | ** | P | P | P | P |
|          | ** |    |    |   | P |   |   |
| 0.102395 |    |    |    | P | P | A | A |
| 2.869543 |    |    | ** | P | P | P | P |
|          |    |    |    | P | A | A |   |
|          |    |    |    |   | P | A |   |
|          |    |    |    | A |   |   |   |
| 2.788828 |    |    | *  | P | P | P | P |
|          | ** |    |    | P |   | A |   |
| 4.228182 |    |    | *  | P |   | P | P |
| 0.446734 |    |    |    | P | P | P | A |
| 1.159345 |    | *  |    | P | P | P | A |
|          | *  |    |    |   | P |   |   |
| 0.258743 |    |    |    | P | P | A | A |
|          |    |    |    |   | A |   |   |
|          |    |    |    | P |   |   |   |
|          |    | *  |    | A |   |   |   |
|          |    |    |    | M | P |   |   |
|          |    |    |    |   |   | A |   |
| 3.634792 | *  | ** | *  | P | P | P | P |
| 1.730023 |    |    |    | A |   | P | P |
| 0.500582 | *  |    |    | P | P | P | P |
| 1.005809 |    | ** |    | P | P | P | P |
| 0.236968 |    |    |    | P | P | P | P |
| 1.157643 |    |    |    | P | A | A | A |
|          |    |    |    | P | P |   |   |
| 8.591514 |    |    | ** |   |   |   | P |
| 1.111792 |    |    |    | P | P | P | P |
|          | *  |    |    | A | P | P |   |
| 1.192207 |    |    |    | P | P | P | P |
|          |    |    |    | A | P | A |   |
|          |    |    |    |   | A | A |   |
| 0.25231  |    |    |    | P | P | P | P |

|          |    |    |    |   |   |   |   |
|----------|----|----|----|---|---|---|---|
| 0.180049 |    |    |    | P | P | P | P |
|          |    |    |    | P | P | A |   |
| 0.767648 |    |    |    | P | P | P | P |
| 0.175174 |    |    |    | P | P | P | A |
| 0.697531 |    |    |    | P | P | P | P |
| 0.481464 |    |    |    | P | P | P | P |
| 1.019197 |    |    |    | P | P | P | P |
| 0.231937 |    | *  |    |   | P | A | A |
| 0.470219 |    |    |    | P | P | P | P |
| 0.594935 | *  |    |    | P | P | P | P |
| 1.540974 |    | *  |    | P | P | A | P |
|          |    |    |    | A |   | A |   |
| 1.047574 |    |    |    | P | P | A | A |
| 0.808364 |    |    |    | P | P | P | P |
|          |    |    | *  |   | P | P |   |
| 3.359888 |    |    |    | * |   | A | P |
| 0.656056 | *  |    |    | P | P | P | P |
|          |    |    | ** |   |   | P |   |
| 0.586527 |    |    |    | A | A | A | A |
| 0.307515 |    |    |    | P | P | A | A |
| 0.45086  |    |    |    | P | P | P | P |
| 4.782934 |    |    | *  | * | P | P | P |
| 2.760799 |    |    | *  | * | P | P | P |
| 0.152403 | ** |    |    | P |   |   | A |
| 0.716904 |    |    |    | P | P | A | P |
| 2.271482 |    |    |    | * | A | M | M |
| 4.465485 | *  |    | *  | * | P | P | P |
| 4.948239 |    |    |    | * |   | P | P |
|          |    |    |    |   | A |   |   |
| 4.566197 |    |    | *  | * | P | P | P |
| 0.574696 |    |    |    | P | P | A | A |
|          | *  | ** |    | P | M |   |   |
|          |    | *  |    |   | P |   |   |
|          |    |    |    | A | P | A |   |
| 0.75808  |    |    |    | P | P | A | A |
| 2.193514 |    |    |    | * | P | P | P |
| 2.757955 |    |    |    | * | P | P | P |
| 3.810111 |    |    |    | * | M |   | P |
| 0.677742 | *  |    |    | P | A | M | A |
|          |    |    |    |   | A | A |   |

|          |    |    |    |   |   |   |   |
|----------|----|----|----|---|---|---|---|
| 1.389457 |    | ** |    | P | P | A | P |
| 0.459937 |    |    |    | P | P | A | A |
|          |    |    |    | A | A |   |   |
| 0.338372 |    |    |    | P | P | P | A |
|          |    |    |    |   | A | A |   |
| 1.797669 |    |    |    | P | P | A | P |
|          |    |    |    |   | A |   |   |
| 7.078972 | *  |    | ** | P |   | A | M |
| 1.022479 |    |    |    | A | A | A | A |
|          |    |    |    | P | P | A |   |
| 0.871924 |    | ** |    | P | P | P | P |
|          |    |    |    |   | A | P |   |
| 2.461478 |    |    | *  | P | P | P | P |
|          | *  | ** |    | P |   | P |   |
|          | ** |    |    | P | P | P |   |
| 0.175347 |    |    |    | P | P | P | M |
| 2.400785 |    |    | *  | P | P | P | P |
| 0.693605 |    | *  |    | P | P | P | P |
| 1.074879 |    |    |    | P | P | P | P |
| 0.496311 |    |    |    | P | P | P | A |
| 1.832147 | *  |    |    | P | P | P | P |
| 0.303343 |    |    |    | A | P | P | A |
| 0.501322 |    |    |    | P | P | P | A |
|          |    |    |    | A |   |   |   |
| 0.757017 |    |    |    | P | P | P | P |
| 0.686889 |    |    |    | P | P | P | P |
| 1.212329 |    | *  |    | P | P | P | P |
| 1.782407 |    |    |    | P | A | A | P |
| 0.088922 |    |    |    |   |   |   | A |
| 1.21567  |    |    |    | P | P | P | A |
| 0.448993 |    |    |    | P | P | P | A |
| 0.429985 |    |    |    | P | P | P | P |
| 7.767401 |    |    | ** | A | A |   | P |
| 0.221194 |    |    |    | P | P | P | A |
| 0.35137  |    |    |    | P | P | P | P |
| 2.759747 |    |    | *  | P |   | A | P |
| 1.578021 | *  |    |    | P | P | P | P |
| 0.543156 |    |    |    | P | P | P | A |
|          | *  |    |    | P |   |   |   |
| 3.018084 |    |    | ** | P | P | P | P |



|          |    |    |    |   |   |   |   |
|----------|----|----|----|---|---|---|---|
| 0.120009 |    |    |    | P | P | P | A |
|          |    |    |    | P | P | P |   |
| 0.439413 |    |    |    | P | P | P | P |
| 0.145022 |    |    |    | P | P | P | A |
|          |    |    |    | A |   |   |   |
| 0.688028 |    |    |    | P | P | P | P |
| 1.848504 |    | *  |    | P | P | P | P |
| 10.95108 |    |    | ** |   |   |   | P |
| 0.292027 |    |    |    | P | P | P | P |
|          |    | ** |    |   | A | P |   |
|          |    |    |    |   |   | A |   |
|          |    |    |    |   |   | A |   |
| 2.264895 | *  |    | *  | P | P | P | P |
|          |    | *  |    |   |   | P |   |
| 0.072499 | *  |    |    | P | P | A | A |
| 0.124017 |    |    |    |   | P | A | A |
| 3.101504 |    | *  | ** | P | P | P | P |
| 1.58736  |    | *  |    | P | P | P | P |
|          |    |    |    |   |   | A |   |
| 0.33206  |    |    |    | P | P | P | P |
| 1.189322 |    |    |    | P | P | P | P |
| 3.316575 |    |    | *  | P |   | A | P |
| 0.460441 |    |    |    | P | P | P | P |
| 1.440436 | *  |    |    | P | P | P | P |
| 2.841964 |    | ** | ** | P | P | P | P |
| 0.098402 |    |    |    | P | P | A | A |
| 0.272809 |    |    |    | P | P | P | P |
| 0.435495 |    |    |    | P | P | P | P |
|          |    |    |    | P | A | A |   |
|          |    | *  |    |   | M |   |   |
| 0.776185 |    |    |    | P | P | P | A |
|          |    |    |    |   | A |   |   |
|          | ** |    |    | P |   |   |   |
| 1.973135 | *  |    |    | P | P | P | P |
| 1.535231 |    | *  |    | P | P | P | P |
|          |    | *  |    |   | M |   |   |
| 0.348367 |    |    |    | P | P | P | P |
|          |    |    |    | A |   |   |   |
| 0.458123 |    |    |    | A | P | A | A |
| 10.396   |    |    | ** |   |   |   | P |

|          |    |    |    |    |   |   |   |   |
|----------|----|----|----|----|---|---|---|---|
| 28.87352 |    |    |    | ** |   |   |   | P |
| 0.515205 |    |    | *  |    | P | P | P | P |
| 0.525254 |    |    |    |    | P | P | P | P |
|          |    |    |    |    |   | A | A |   |
| 2.386738 |    |    |    | *  | P | P | P | P |
|          |    | *  | ** |    |   | M | P |   |
| 2.736117 |    |    |    | *  | M | A | P | P |
| 0.258337 |    |    |    |    | P | P | P | A |
| 0.35204  |    |    |    |    |   | P | P | A |
| 0.484553 | *  |    |    |    | P | P | P | P |
| 2.339197 |    |    |    | *  | P |   | P | P |
| 0.555366 |    |    |    |    | P | P | P | M |
|          |    |    | ** |    |   |   | M |   |
| 0.075415 |    |    |    |    |   |   |   | A |
| 1.147632 | *  |    |    |    | P | P | P | P |
| 1.779161 | ** | *  |    |    | P | P | P | P |
| 0.376029 |    |    |    |    | P | P | P | A |
|          |    |    |    |    | A | P |   |   |
| 0.231254 |    |    |    |    |   | M | A | A |
|          |    |    |    |    |   |   | A |   |
| 0.201437 |    |    |    |    | P | P | P | P |
| 0.337992 |    |    |    |    | P | P | A | A |
| 0.043185 |    |    |    |    |   |   | M | A |
| 2.492333 |    | *  | *  | *  | P | P | P | P |
|          |    | *  |    |    |   | M |   |   |
|          |    |    |    |    | P | P | A |   |
| 3.334073 |    |    |    | *  | P | P | P | P |
|          | *  |    |    |    | M |   |   |   |
|          |    | ** |    |    | A | P | A |   |
| 0.341733 |    |    |    |    | P | P | P | P |
|          |    |    |    |    | A | A | A |   |
| 2.105255 |    |    |    | *  | P | P | P | P |
| 1.182291 | *  |    |    |    | P | P | P | P |
| 0.591515 |    |    |    |    | P | P | P | P |
|          |    |    |    |    | A | A | A |   |
| 0.482704 |    |    |    |    | P | P | P | P |
| 1.407307 |    |    | *  |    | P | P | P | P |
| 0.276056 | *  |    |    |    | P | P | M | A |
| 0.955333 |    |    |    |    | P | M | A | A |
|          |    |    |    |    |   | A |   |   |

|          |    |    |    |   |   |   |   |
|----------|----|----|----|---|---|---|---|
|          | ** |    |    | P |   |   |   |
| 3.621759 |    |    | *  | A |   | P | P |
| 0.303263 |    |    |    | P | P | P | P |
|          |    | ** |    | P | P | P |   |
| 0.713776 |    | *  |    | P | P |   | A |
|          |    |    |    | P |   | A |   |
| 8.672032 |    |    | ** |   | P | A | M |
| 0.251652 |    |    |    | P | P | P | A |
|          |    |    |    | P | P | A |   |
| 0.035339 | ** |    |    | P | A | A | A |
|          |    | *  |    |   |   | P |   |
| 0.391683 |    |    |    | P | P | P | A |
| 2.034278 |    |    | *  | A | A |   | P |
|          |    |    |    | P | A |   |   |
| 0.465077 |    |    |    | P | P | P | P |
| 0.550503 |    |    |    | P | P | P | A |
| 0.664406 |    | ** |    | P | P | P | P |
| 1.647072 |    | *  |    | P | P | P | P |
| 1.007075 |    |    |    | P | P | P | A |
| 3.429891 |    |    | *  | P | P | A | P |
|          |    |    |    | P | A |   |   |
|          |    | *  |    |   | P |   |   |
| 2.605749 |    |    | *  |   | A |   | P |
| 3.4859   |    | ** | *  | P | P | P | P |
| 2.147749 |    |    | *  | P | P | P | P |
| 0.163462 | *  |    |    | M |   | A | A |
| 0.388464 |    |    |    | P | P | P | A |
| 2.144636 |    |    | *  | P | P | P | P |
|          |    |    |    |   |   | A |   |
|          |    |    |    |   | M | A |   |
|          | *  |    |    | P | P | P |   |
| 3.209179 |    | *  | ** | P | P | P | P |
| 0.186959 |    |    |    |   | A | M | A |
| 0.391707 |    |    |    | P | P | P | P |
| 2.094227 |    | ** | *  |   |   | P | P |
| 2.083795 |    |    | *  | P | P | P | P |
| 0.446624 |    |    |    | P | P | P | P |
| 0.018457 |    |    |    | P | P | P | A |
|          |    | *  |    |   | P | A |   |
| 0.382594 |    |    |    | P | P | P | P |

|          |    |    |    |    |   |   |   |
|----------|----|----|----|----|---|---|---|
| 1.598539 |    |    |    | P  | P | P | P |
|          | *  |    |    | P  | A |   |   |
| 2.376527 |    |    | *  | *  | P | P | P |
|          | *  |    |    |    | P | P | M |
| 32.83286 |    |    | ** | ** |   | P | P |
| 0.109065 |    |    |    |    | P | P | A |
| 0.908534 |    | ** |    |    | P | P | A |
| 1.2696   | ** |    |    |    | P |   | A |
| 0.437745 | *  |    |    |    | P | P | P |
|          | *  |    |    |    | P | P |   |
| 0.43939  |    |    |    |    | P | P | P |
| 0.371715 |    |    |    |    | P | P | P |
|          |    |    |    |    |   | P | A |
| 0.139185 |    |    |    |    | P | P | P |
| 0.435494 |    |    |    |    | P | P | P |
|          |    |    |    |    | P | P | P |
| 2.143015 |    |    |    | *  | P | P | P |
| 0.866172 |    |    |    |    | P | P | P |
|          |    | ** |    |    | P | P | A |
| 1.531328 |    | *  |    |    | P | M | P |
|          | *  |    | *  |    | P |   | P |
| 0.467055 |    |    |    |    | P | P | P |
| 1.839898 |    |    |    |    | P | P | A |
| 0.332332 |    |    |    |    | P | P | P |
| 0.669644 |    |    |    |    | P | P | P |
|          |    |    |    |    |   |   | A |
| 1.123398 |    |    |    |    | P | P | A |
| 0.414667 |    |    |    |    |   |   | A |
| 0.963448 |    |    |    |    | P | P | P |
|          |    |    |    |    |   | A |   |
| 0.069764 |    |    |    |    | P |   |   |
|          |    |    |    |    |   |   | A |
|          |    |    |    |    |   | A |   |
| 14.01019 |    |    |    | ** | P |   | M |
|          |    | *  |    |    |   | M |   |
| 0.421162 |    |    |    |    | P | P | P |
| 3.090319 |    |    |    | ** | P | P | A |
| 2.875994 |    | *  |    | ** | A | P | P |
| 5.431061 |    | ** |    | *  |   |   | P |
|          |    |    |    |    | A | P | M |

|          |    |    |    |    |   |   |   |   |
|----------|----|----|----|----|---|---|---|---|
| 3.831803 |    |    |    | *  | P | P | P | P |
| 0.66699  |    |    |    |    | P | P | P | P |
| 0.837418 | *  |    |    |    | P | P | P | P |
| 0.362124 |    |    |    |    | P | P | P | M |
| 2.701454 |    |    |    | *  | P | P | P | P |
|          |    |    |    |    | A |   | A |   |
| 5.659215 | *  | ** | ** | *  | P | P | P | P |
| 1.899579 |    |    |    |    | P | P | P | P |
| 1.388884 |    | *  |    |    | P | P | P | P |
| 4.360007 |    |    |    | *  | P | P | P | P |
| 1.216629 |    | *  | ** |    | P | P | P | P |
|          |    |    |    |    | P | P | M |   |
| 1.861319 |    |    |    |    | A | A | A | P |
|          |    |    |    |    | A | A |   |   |
|          |    |    |    |    | A | P | A |   |
|          | ** |    |    |    | P | P | A |   |
|          | *  | *  |    |    | P | M |   |   |
|          |    |    | *  |    |   | P | P |   |
| 0.664511 | *  |    |    |    | P | P | P | P |
|          | *  |    |    |    | P |   | P |   |
| 2.03076  |    |    |    | *  | P | P | P | P |
| 0.318482 |    |    |    |    | P | P | P | P |
| 0.491417 |    |    |    |    | P | P | P | P |
| 0.598412 |    |    |    |    | P | P | P | P |
|          |    |    |    |    | A | P | A |   |
| 0.509007 |    |    |    |    | P | P | A | A |
| 0.444131 |    |    |    |    | P | P | P | P |
|          |    | ** |    |    |   | M |   |   |
| 14.23309 |    |    |    | ** | P | P | P | P |
| 0.763808 |    |    |    |    | P | P | P | P |
| 28.63172 |    |    |    | ** |   |   |   | P |
| 2.307094 |    |    |    | *  | M |   | A | P |
| 1.970672 |    |    | *  |    | P | P | P | P |
|          |    |    |    |    | P | A |   |   |
|          |    | ** |    |    |   | P | M |   |
| 0.037292 | *  |    |    |    | P | A | A | A |
| 0.740257 |    |    |    |    | P | P | P | P |
| 0.805718 |    |    |    |    | P | P | P | P |
|          |    |    | *  |    |   |   | M |   |
| 2.274477 |    |    |    | *  | A |   |   | P |

|          |    |    |    |   |   |   |   |
|----------|----|----|----|---|---|---|---|
| 0.555265 |    |    |    | P | P | P | P |
|          |    |    |    | A |   |   |   |
| 3.219929 |    |    | ** |   | P |   | P |
| 2.435612 |    | *  | *  | P | A | P | M |
| 1.700413 |    | *  |    | P | P | P | P |
|          |    | *  |    | M | A | A |   |
| 0.572555 | *  |    |    | P | P | P | P |
|          |    | *  |    | A | P |   |   |
| 0.090563 | ** |    |    | P |   | A | A |
|          |    |    |    |   |   | A |   |
| 3.256234 |    | ** | *  | P | P | P | P |
| 2.79848  |    | *  | *  | P | P | P | P |
| 0.42214  |    |    |    | P | P | P | P |
|          |    |    |    | A | A | A |   |
| 0.973224 |    | ** |    | P | P | P | P |
|          |    |    |    | A |   |   |   |
| 71.42501 |    |    | ** |   | P |   | P |
| 1.60159  |    | *  |    | A | P |   | P |
| 2.379396 |    | *  | *  | A | P | P | P |
| 3.44016  |    |    | *  |   | A | P | P |
|          |    |    |    | A |   |   |   |
|          |    |    |    | P | P | A |   |
| 0.639232 |    |    |    | P | P | P | P |
|          |    | *  |    | A | P |   |   |
| 1.16045  |    |    |    | P | P | P | P |
| 0.724686 |    |    |    | P | P | P | P |
|          |    |    |    |   |   | A |   |
| 0.8761   |    | *  |    | A | P |   | A |
|          |    |    |    |   | A |   |   |
| 3.483341 |    |    | *  | A |   |   | P |
| 0.714411 |    | *  |    | P | P | P | A |
|          |    | *  |    | A | P | A |   |
| 0.851578 | *  |    |    | P | P | P | P |
| 1.76068  |    | *  |    | P | P | P | P |
| 0.476334 |    |    |    | P | P | P | A |
| 2.145841 |    |    | *  | P | P | P | P |
| 1.199909 |    | ** |    | A | A | P | A |
| 2.940568 |    |    | ** | P | P | P | P |
|          |    |    |    | A |   |   |   |
| 0.800184 |    |    |    | P | P | P | P |

|          |    |    |    |   |   |   |   |
|----------|----|----|----|---|---|---|---|
| 1.379515 |    |    |    | P | P | P | A |
| 4.085739 |    |    | *  | P |   | P | P |
| 0.439299 | ** |    |    | P | P | P | P |
| 2.547048 |    | *  | *  | P | P | P | P |
| 0.390088 |    |    |    | P | P | P | P |
|          |    |    |    | A |   |   |   |
| 0.844997 |    |    |    | P | P | P | A |
| 2.160994 |    |    | *  | P | P | P | P |
| 2.044909 |    |    | *  |   | P | P | P |
| 9.408117 |    | *  | ** | P | M | P | P |
| 0.302122 |    |    |    | P | P | P | P |
| 0.422007 |    |    |    |   | A |   | A |
| 0.327406 |    |    |    | P | P | P | A |
|          |    |    |    | P | A |   |   |
| 2.682957 |    |    | *  |   |   | A | M |
| 1.211144 |    |    |    | P | P | P | P |
| 2.123868 |    |    | *  |   | A |   | P |
|          |    |    |    | A | P | P |   |
|          |    | *  |    | P | P | A |   |
| 11.4451  |    | ** | ** | P | P | P | P |
| 1.864273 |    | *  |    | P | P | P | P |
| 11.53542 |    |    | ** |   | M | P | P |
| 0.836324 |    |    |    | P | P | P | P |
| 0.365939 |    |    |    | P | P | P | P |
| 0.499229 |    |    |    | P | P | P | P |
|          |    |    |    | P | P | A |   |
| 0.556235 |    |    |    | P | P | P | P |
| 2.42938  |    | ** | *  | P | P | P | P |
| 0.480762 |    |    |    | P | P | P | P |
| 1.845615 | *  |    |    | P |   | A | A |
|          |    |    |    | P | A |   |   |
|          |    | ** |    |   | M | P |   |
| 2.113617 |    |    | *  | P | P | P | M |
|          |    |    |    | P | P | A |   |
| 3.686825 |    | *  | *  | P | P | P | P |
| 3.351732 |    |    | *  | P | P | P | P |
| 41.46007 |    |    | ** |   |   |   | P |
| 4.580424 |    | *  | *  | A | P | P | P |
| 2.02199  | *  |    | *  | P | P | P | P |
| 2.204463 |    |    | *  | P | P | P | P |

|          |    |   |    |   |   |   |   |
|----------|----|---|----|---|---|---|---|
|          |    | * |    | A | M |   |   |
| 36.64858 |    |   | ** |   |   |   | P |
|          |    |   |    |   |   | A |   |
| 0.112514 |    |   |    |   |   |   | A |
| 0.709419 |    |   |    | P | P | P | P |
|          |    | * |    | M | P |   |   |
| 2.675026 |    |   | *  |   |   |   | M |
| 0.444856 |    |   |    | P | P | P | P |
|          | *  |   |    | P |   |   |   |
| 0.547849 |    |   |    | P | A |   | A |
| 1.295354 |    | * |    |   | P | P | P |
|          |    |   |    | A | P | A |   |
| 0.984924 |    |   |    | A | M | P | A |
|          |    |   |    | A | M |   |   |
|          |    |   | ** |   |   | M |   |
|          |    |   |    | M | P | A |   |
|          |    |   |    |   | A |   |   |
| 0.380534 |    |   |    |   | A |   | A |
|          | ** |   |    | P | P | A |   |
|          | ** |   |    | P |   |   |   |
| 1.109783 |    |   | ** | P | P | P | P |
|          |    |   |    |   | P | A |   |
|          |    |   |    |   |   | A |   |
|          |    |   |    | P | A | A |   |
|          |    |   |    | A |   |   |   |
|          | ** |   |    | M |   |   |   |
| 3.711076 |    |   | ** | * |   | P | P |
| 0.633192 |    |   |    | P | P | P | A |
| 0.437107 |    |   |    |   | A | A | A |
| 2.192862 |    |   | *  | * | P | P | P |
| 0.583981 |    |   |    |   | P | P | P |
| 0.174378 | ** |   |    | P |   |   | A |
|          | *  |   |    | P |   |   |   |
| 2.311606 | *  | * |    | * | P | P | P |
| 35.5105  |    |   | ** | * | P |   | P |
| 2.641034 |    |   | *  | * | P | P | P |
| 5.603309 |    |   | *  | * |   | P | P |
| 0.626618 | ** |   |    | P | P | A | P |
| 1.093116 | *  | * |    | P | P | A | P |
| 0.854942 | ** | * |    | P | P | A | A |



|          |    |   |    |    |   |   |   |   |
|----------|----|---|----|----|---|---|---|---|
|          |    |   | *  |    | A |   | M |   |
|          |    |   |    |    | P | P | A |   |
|          |    |   |    |    |   | P | A |   |
| 13.29271 | *  |   | *  | ** | P | P | P | P |
|          |    |   | ** |    |   |   | P |   |
| 9.282708 |    |   | ** | ** | P | P | P | P |
| 0.512005 | *  |   |    |    | P | P | P | A |
| 2.66227  |    |   |    | *  | P | P | P | P |
| 0.437537 |    |   |    |    | P | P | P | P |
| 3.108232 | *  |   | ** | ** | P | P | P | P |
|          |    |   | *  |    |   |   | P |   |
| 0.881017 |    |   |    |    | P | P | P | P |
| 1.049303 |    |   |    |    | P | P | P | A |
| 0.858625 |    |   |    |    | P | P | P | P |
| 0.722091 |    |   |    |    | P | P | P | A |
| 0.456271 |    |   |    |    | P | P | P | A |
| 2.111519 |    |   |    | *  | P | P | P | A |
|          |    |   |    |    |   |   | A |   |
| 1.298763 | *  |   |    |    | P | P | P | P |
|          | *  |   | *  |    | P | A | P |   |
| 0.49404  |    |   |    |    | P | P | P | P |
| 0.359811 | ** |   |    |    | P | P | P | P |
|          |    |   | ** |    |   |   | P |   |
| 0.564456 |    |   |    |    | P | P | P | P |
| 1.059506 |    |   |    |    | P | P | P | P |
| 0.30991  |    |   |    |    | P | P |   | A |
| 0.456403 |    |   |    |    | P | P | P | P |
| 0.728815 | *  |   |    |    | P | P | P | P |
|          |    |   |    |    | P | P | A |   |
| 0.449762 |    |   |    |    | P | P | P | P |
| 0.495844 |    |   |    |    | P | P | P | A |
| 0.458698 |    |   |    |    | P | P | P | P |
|          |    |   |    |    |   |   | A |   |
|          |    |   |    |    | P | P | A |   |
|          |    |   |    |    | M | A |   |   |
| 0.456115 | *  |   |    |    | P | P | P | P |
| 3.232095 |    |   |    | ** |   |   |   | P |
| 1.890319 |    |   |    |    | A |   |   | A |
| 2.285091 | *  |   |    | *  | P | P | P | P |
|          |    | * |    |    |   | M |   |   |

|          |    |    |    |   |   |   |   |
|----------|----|----|----|---|---|---|---|
| 0.849008 |    |    |    | P | P | P | A |
| 4.673796 |    | *  | *  | P | P | P | P |
| 1.647403 |    |    |    | P | P | P | P |
| 0.289931 |    |    |    | P | P | P | A |
|          |    | ** |    | A | M |   |   |
| 2.342299 | *  |    | *  | P | P | P | P |
| 0.53794  |    |    |    | P | P | P | P |
|          |    | *  |    |   |   | M |   |
| 0.381585 |    |    |    | P | P | P | A |
| 0.130541 |    |    |    |   |   |   | A |
| 6.531853 |    |    | ** | P | P | P | P |
| 2.130212 |    |    | *  | P |   | P | P |
| 3.069    |    |    | ** | M |   | P | P |
| 0.495159 |    |    |    | P | P | P | P |
|          |    |    |    | P | P | A |   |
|          | ** |    |    | M |   |   |   |
| 0.3274   |    |    |    | P | P | P | A |
| 0.199527 |    |    |    | A |   |   | A |
|          |    |    |    |   | P | A |   |
|          |    |    |    | P | A | A |   |
| 0.124986 |    |    |    | P | P | A | A |
| 2.020807 |    |    | *  |   | P | P | P |
| 0.369225 |    |    |    | P | P | P | A |
| 40.65019 |    | *  | ** |   | A | P | P |
| 0.655573 |    |    |    | P | P | P | P |
| 0.548279 |    |    |    | P | P | P | P |
| 0.488162 |    |    |    | P | P | P | P |
| 3.748813 |    | *  | *  | P | P | P | P |
| 2.726235 |    | *  | *  |   | A | P | M |
| 2.095454 |    | *  | *  | P | P | P | P |
| 0.140232 |    |    |    |   |   |   | A |
| 1.743269 |    | *  |    | P | P | P | P |
| 0.691809 |    |    |    | P | P | P | P |
|          | *  |    |    | P |   |   |   |
|          | ** |    |    | M |   |   |   |
|          |    |    |    | P | A |   |   |
| 0.429743 |    |    |    | P | P | P | P |
| 1.232223 |    |    |    | P | A | P | A |
| 1.555694 |    |    |    | P | P | P | P |
| 0.430097 |    |    |    | P | P | P | P |

|          |    |    |    |   |   |   |   |
|----------|----|----|----|---|---|---|---|
| 2.332273 |    |    | *  | P | P | P | P |
| 0.957517 |    | *  |    | P | P | P | P |
|          |    |    |    | A | A | A |   |
|          |    | ** |    |   | P |   |   |
| 0.953032 |    |    |    | P | P | A | A |
|          |    |    |    | A |   |   |   |
| 5.304863 |    | ** | *  | A | P |   | P |
| 2.087563 |    |    | *  | P | P | A | P |
| 0.432766 |    |    |    | P | P | P | P |
|          |    | *  |    | P | P | A |   |
| 1.337675 |    |    |    | P | P | P | P |
| 10.85168 |    |    | ** |   | A |   | P |
| 2.074431 |    |    | *  |   |   |   | P |
| 2.362838 |    |    | *  | P | A |   | P |
| 0.548124 |    |    |    | P | P | P | P |
| 2.286867 |    |    | *  | P | P | P | P |
| 0.683824 |    |    |    |   | P | A | A |
| 3.632105 |    |    | *  | M | M | P | P |
| 0.737607 |    |    |    | P | P | P | M |
|          |    |    |    |   | P | A |   |
| 0.599804 |    |    |    | P | P | P | P |
| 1.828937 | *  |    |    | P |   |   | P |
| 0.484818 |    |    |    | P | P | P | P |
| 0.377872 |    |    |    | P | A |   | A |
| 0.26983  | *  |    |    | P |   | A | A |
| 0.105271 |    |    |    | P | P | P | A |
| 0.539916 |    |    |    | P | P | A | A |
| 0.271098 |    |    |    |   |   |   | A |
| 0.064608 |    | *  |    | P | P |   | A |
|          |    |    | *  | M | A | P |   |
| 5.024321 | *  |    | *  | P |   | P | P |
| 7.234614 | *  | ** | ** | P | P | P | P |
| 3.024102 | *  |    | ** | P | P | P | M |
| 1.729441 | *  |    |    | P |   |   | A |
| 1.15727  |    | ** |    | A | P | A | P |
|          |    |    | *  | P | A | A |   |
| 1.465604 |    |    |    | A | P | A | A |
|          | ** |    |    | P |   |   |   |
| 0.992724 |    |    |    | P | P | P | P |
| 0.443632 |    |    |    | P | P | A | A |

|          |    |   |    |    |   |   |   |   |
|----------|----|---|----|----|---|---|---|---|
| 2.05707  |    |   |    | *  |   | A |   | A |
| 5.487836 |    |   |    | *  | A | P | A | P |
| 1.02838  | *  |   |    |    | P | P | P | P |
| 0.546386 |    |   |    |    | P | P | P | P |
| 0.556298 |    |   |    |    | P | P | P | A |
| 0.788511 |    |   |    |    |   | P | A | A |
| 0.741794 |    |   |    |    | P | P | A | P |
| 0.369679 |    |   |    |    | P | P | P | P |
| 0.980886 |    | * | *  |    | P | P | P | A |
| 1.405646 |    |   | *  |    | P | P | P | A |
| 0.648711 |    |   |    |    | P | A | P | A |
| 0.217235 |    |   |    |    | P | P | P | P |
| 0.86611  |    |   | *  |    | P | P | P | P |
| 2.39405  |    |   |    | *  | P | P | P | P |
| 0.171135 |    |   |    |    |   | A | A | A |
| 0.607896 |    |   |    |    | P | P | P | P |
| 0.38285  | ** |   |    |    | P | P | A | A |
| 1.213762 |    |   |    |    | P | P | P | P |
| 0.934701 |    |   |    |    | P | P |   | A |
|          |    |   | *  |    | A |   | A |   |
| 0.060381 |    |   |    |    | P | P | P | A |
|          |    |   |    |    |   | A | A |   |
| 0.13076  |    |   |    |    | P | P | P | A |
| 2.232883 |    |   |    | *  | P | P | A | P |
| 1.422646 |    |   | *  |    | P | P | P | P |
| 0.498555 |    |   |    |    | P | P | P | P |
| 2.157255 |    |   |    | *  | P | P | P | P |
| 0.481308 | *  |   |    |    | P | P | P | P |
| 0.360262 |    |   | ** |    | P | P | P | A |
| 0.49866  |    |   |    |    | P | P | P | P |
| 0.282526 |    |   |    |    | P | P | P | A |
| 0.418494 |    |   |    |    | P | P | A | A |
| 1.480304 |    | * |    |    |   | P |   | M |
| 0.461798 |    |   |    |    | P | P | P | P |
|          |    | * |    |    | P | P | P |   |
|          | *  |   |    |    | P |   |   |   |
| 12.68689 | ** |   | *  | ** | P |   | P | M |
| 2.972872 |    |   |    | ** | P | P | P | P |
| 0.176771 |    |   |    |    | P | P | A | A |
| 0.309051 |    |   |    |    | P | P | P | P |

|          |    |    |    |    |   |   |   |   |
|----------|----|----|----|----|---|---|---|---|
| 0.452853 |    |    |    |    | A |   |   |   |
| 1.31851  |    |    | ** |    | P | P | A | A |
|          | ** |    |    |    | P |   | P | P |
| 0.772471 | *  |    |    |    | M |   |   |   |
| 6.443873 |    | *  | ** | *  | P | P | P | P |
| 16.75187 |    | *  | ** | ** | P | P | P | P |
| 2.922595 |    |    |    | ** |   | P | P | P |
| 0.463639 |    |    |    |    | P | P | P | P |
|          |    |    |    |    |   |   | A |   |
|          | *  |    |    |    | P | P | A |   |
| 4.622951 |    |    |    | *  |   |   |   | M |
| 0.191552 |    |    |    |    | P | P | P | P |
| 0.17952  |    |    |    |    | P | P | A | A |
| 0.280594 |    |    |    |    | P | P | P | A |
| 1.214051 |    |    |    |    | P | P | P | P |
| 2.674374 |    |    |    | *  | P | P | A | A |
| 1.786527 |    | *  |    |    | P | P | P | P |
|          |    |    |    |    | P | A | A |   |
| 2.522382 |    |    |    | *  | P | P |   | P |
| 2.355465 |    | *  |    | *  | P | P | P | P |
|          |    |    |    |    | P | A | P |   |
| 2.511212 |    | *  |    | *  | P | P | P | P |
| 0.5953   |    |    |    |    | P | A | A | A |
| 3.875563 |    |    |    | *  |   | A |   | P |
| 0.612504 |    |    |    |    | P | P | A | P |
| 22.54872 |    |    |    | ** |   |   |   | P |
|          |    | ** |    |    |   | P |   |   |
| 0.476476 |    |    |    |    | P | P | P | P |
| 4.931102 |    | *  |    | *  | P | P | P | P |
| 1.071995 |    | ** |    |    | P | P |   | A |
| 0.490601 |    |    |    |    | P | A | A | A |
| 1.291004 | *  |    |    |    | P | P | P | P |
| 4.295676 |    |    |    | *  | P | P | M | P |
| 4.532082 |    | *  |    | *  | P | P | P | P |
| 2.002986 |    |    |    | *  | P | P | P | P |
|          |    |    |    |    | P |   | A |   |
|          |    | ** | ** |    | P | P | P |   |
|          |    |    |    |    | A | P | A |   |
| 2.090432 |    |    |    | *  | P | P | P | P |

|          |    |    |    |   |   |   |   |
|----------|----|----|----|---|---|---|---|
|          | ** | ** |    | P | P |   |   |
| 2.975545 |    |    | ** | A |   |   | P |
|          |    |    |    | M | P | A |   |
| 0.233858 |    |    |    | P | P | P | P |
| 0.424213 |    |    |    | P | P | A | A |
| 0.053456 |    |    |    | P | P | A | A |
| 2.115314 |    |    | *  | P | P | P | P |
| 0.410466 |    |    |    | P | P | A | A |
| 0.707526 | *  |    |    | P | P | P | A |
| 1.448221 |    | *  |    |   | P |   | M |
| 0.993832 |    |    |    | P | P | P | P |
| 0.89285  |    |    | *  |   |   | P | M |
| 0.399764 |    |    |    | P | P | P | A |
| 0.602259 |    | *  |    | P | P | P | A |
| 2.46657  |    |    | *  |   |   |   | P |
| 2.053713 |    |    | *  | P | P | P | P |
| 2.074665 |    |    | *  | P | P | P | P |
|          |    |    |    |   |   | A |   |
| 0.410505 |    |    |    | P | P | P | P |
|          |    |    |    | A |   |   |   |
| 0.838103 |    |    |    | A | M | P | A |
| 0.368087 |    |    |    |   | M |   | A |
| 1.278721 |    |    |    | A | A | P | A |
|          |    |    |    | A | P |   |   |
| 0.816904 |    | ** |    | P | A | P | A |
| 2.171508 |    |    | *  | P | A | P | P |
| 1.366558 |    |    |    | P | A | A | A |
| 16.3417  |    | *  | ** |   | P | P | P |
| 0.598175 |    |    |    | P | P | P | A |
|          | *  |    |    | M | P | A |   |
| 2.114418 |    |    | *  | A | A | A | P |
| 0.740489 |    |    |    | P | P | P | P |
| 0.090475 |    |    |    |   |   | A | A |
| 3.840321 |    |    | *  |   |   |   | P |
| 5.371536 |    |    | *  |   |   | A | P |
| 0.11726  |    |    |    | P | P | A | A |
| 1.547517 |    | *  |    | P | P | P | P |
|          |    |    |    | A |   |   |   |
|          |    |    |    | A |   |   |   |
| 0.436175 | *  |    |    | P | P | P | P |

|          |    |    |    |   |   |   |   |
|----------|----|----|----|---|---|---|---|
| 2.127047 |    |    | *  | P | P | P | M |
| 1.092243 |    | ** |    | P | P | P | P |
| 0.367795 |    |    |    | P | P | P | A |
| 0.425653 |    |    |    | P | P | P | A |
|          |    |    |    | A | A |   |   |
| 0.297462 |    |    |    | P | P | P | P |
| 0.207149 |    |    |    | P | P | P | P |
|          |    |    |    | A | P |   |   |
| 0.164849 |    |    |    |   | A | A | A |
|          |    |    |    |   | P | P |   |
|          |    |    |    | A | A |   |   |
| 0.892487 |    |    |    | P | P | P | P |
|          |    |    |    |   |   | A |   |
| 2.435329 |    |    | *  | P | P | P | P |
|          |    |    |    | A |   |   |   |
|          | *  |    |    |   | M |   |   |
| 0.109586 |    |    |    | P | A |   | A |
|          |    | ** |    | A |   | P |   |
| 0.625225 |    |    |    | P | P | A | A |
|          |    |    |    |   | P | A |   |
| 3.885413 |    |    | *  |   |   |   | P |
|          | *  |    |    | M |   |   |   |
| 58.09682 |    |    | ** |   |   | P | P |
|          |    |    |    | A |   |   |   |
| 0.036287 |    |    |    | P | P | A | A |
|          |    | *  |    | P |   | P |   |
| 1.937454 |    | *  |    | P | P | P | P |
| 0.961795 |    |    |    | P | P | P | P |
| 0.658342 |    |    |    | A | P | A | A |
| 0.604577 |    |    |    | P | P | P | P |
| 1.387194 |    |    |    | P | A | M | P |
| 10.42729 | ** | *  | ** | P | P | P | P |
| 1.998194 |    | *  |    | P |   | P | P |
| 1.66614  |    | ** |    |   | P |   | M |
| 17.497   |    |    | ** |   | A |   | P |
| 0.110696 |    |    |    | P | P |   | A |
| 0.389729 |    |    |    | P | P | P | P |
| 3.135854 |    | *  | ** | P | P | A | P |
|          |    |    |    |   | A |   |   |
| 0.707027 | *  |    |    | P | P | P | P |

|          |    |   |    |   |   |   |   |
|----------|----|---|----|---|---|---|---|
|          | ** |   |    | P | P |   |   |
| 0.397506 |    |   |    | P | P | P | P |
| 1.449605 |    |   | ** |   |   | M | P |
|          |    |   |    |   | A | A |   |
|          |    |   | ** |   |   | P |   |
|          |    |   |    | A |   | P |   |
| 1.268378 |    |   | *  | P | P | P | P |
| 1.912921 |    | * |    | P | P | P | M |
| 0.098285 |    |   |    |   |   |   | A |
|          |    |   |    | P |   | A |   |
| 1.129884 |    |   |    | P | P | P | P |
| 0.925023 |    |   |    | P | P | A | A |
| 2.0429   |    |   |    | * | P | M | P |
|          |    |   |    |   | A |   |   |
|          | ** | * |    | P | P | A |   |
| 1.045921 | ** |   |    | P | P | A | A |
| 0.420335 |    |   |    | P | P | P | P |
| 2.841351 |    |   | ** | M |   |   | M |
|          |    |   |    |   |   | A |   |
| 0.454416 |    |   |    | P | P | P | A |
| 1.260035 | *  |   |    | P | P | P | P |
| 2.31039  |    |   | *  | P |   | P | M |
| 0.963113 |    |   | *  | P | P | P | A |
| 0.785586 | *  |   |    | P | P | A | A |
|          |    |   |    | P | A | A |   |
| 0.27075  |    |   |    | P | P | P | P |
| 1.909382 |    |   | ** |   |   | P | A |
| 2.267644 |    |   | *  | P | P | P | P |
| 0.039353 |    |   |    | P | P | P | A |
|          | *  |   |    | P | P | P |   |
| 0.413785 |    |   |    |   | A | A | A |
|          |    | * |    |   | P |   |   |
| 0.496401 |    |   |    | P | P | P | P |
| 0.466684 |    |   |    | P | P | P | A |
| 2.838506 |    |   | *  | P |   |   | P |
| 0.021866 |    |   |    | P | M | A | A |
|          |    | * |    |   | P | P |   |
|          |    |   |    | A | P | A |   |
| 0.264783 |    |   |    | P | P | P | A |
| 0.292948 |    |   |    |   | P |   | A |



|          |    |    |    |   |   |   |   |
|----------|----|----|----|---|---|---|---|
|          |    |    |    |   | A | P |   |
|          |    |    |    |   | A |   |   |
| 0.330798 |    |    |    | P | P | P | P |
| 0.424681 |    |    |    | P | P | P | P |
| 0.310346 |    |    |    | P | P | P | P |
| 2.019948 |    |    | *  | P | P | P | P |
| 1.886606 |    |    |    | P | P | P | P |
| 5.195815 |    |    | *  | A | P |   | M |
| 18.50812 | ** |    | ** |   | P | A | P |
| 0.664782 |    |    |    | P | P | A | A |
| 1.268407 |    |    |    | A |   |   | P |
| 1.615947 | *  |    |    | P | P | A | A |
| 0.854592 |    |    |    | P | P | P | A |
|          |    |    |    | P | A | A |   |
| 0.296282 |    | ** |    |   | P | P | A |
| 3.040294 | ** |    | ** | P | P | P | P |
| 0.642412 |    |    |    | P | P | P | P |
| 11.15109 |    | *  | ** | A | P | M | P |
|          | *  |    |    |   | M | A |   |
|          |    |    |    |   | A |   |   |
|          |    |    |    | A | A |   |   |
|          |    |    |    | A |   | A |   |
|          |    |    |    | P | M | A |   |
|          | ** | ** |    |   | M | P |   |
| 0.137954 |    |    |    | P | P | P | A |
|          |    | *  |    |   |   | M |   |
| 0.140518 |    |    |    | P | P | P | A |
| 0.742064 |    |    |    | P | P | A | M |
| 2.908665 | *  |    | ** | A | P | A | P |
|          |    |    |    |   | A |   |   |
|          | ** |    |    |   | P |   |   |
|          |    |    |    | P | P | A |   |
|          |    |    |    |   |   | A |   |
|          | *  |    |    | P | P | A |   |
|          |    | *  |    |   |   | M |   |
|          | ** |    |    |   | P |   |   |
| 1.722166 |    |    |    |   | A | A | P |
|          | ** |    |    |   | M |   |   |
| 2.043739 |    |    | *  | P | P | P | P |

|          |    |    |    |    |   |   |   |   |
|----------|----|----|----|----|---|---|---|---|
| 0.339989 |    |    |    |    | P | P | P | A |
|          |    |    |    |    | A |   | A |   |
|          |    | *  |    |    |   | P |   |   |
| 3.590931 |    |    |    | *  |   |   | M | P |
|          |    | *  |    |    |   | P | A |   |
| 0.465379 |    |    |    |    | P | P | P | A |
| 4.491137 |    |    |    | *  | P | P | P | P |
|          |    | *  |    |    |   | P | P |   |
|          |    |    | *  |    | A | A | A |   |
|          |    | ** |    |    |   | M |   |   |
|          |    | ** |    |    |   | P | A |   |
| 0.255842 |    |    |    |    | A | A |   | A |
| 0.102492 |    |    |    |    |   | A |   | A |
| 1.846826 |    |    |    |    | P | P | P | P |
| 2.217769 |    |    |    | *  | P | P | P | P |
|          |    |    |    |    |   | A |   |   |
| 2.280506 |    |    |    | *  | P | P | P | P |
| 3.270337 | ** | *  | ** | *  | P | P | P | P |
| 0.456091 |    |    |    |    | P | P | P | P |
| 4.370171 |    |    |    | *  |   |   |   | P |
| 0.446246 |    |    |    |    | P |   |   | A |
|          |    | *  |    |    | P | M | A |   |
| 2.416904 |    |    |    | *  | P | P | P | P |
|          |    |    | *  |    | A |   | P |   |
| 0.078493 |    |    |    |    | P | P | A | A |
| 0.642929 |    |    |    |    | P | P | P | P |
|          |    |    |    |    |   | A |   |   |
| 0.523592 | *  |    |    |    | P | P | P | P |
|          |    |    | ** |    |   |   | M |   |
|          | *  |    |    |    | P | P | A |   |
| 3.136431 |    |    | *  | ** | P | P | P | A |
| 0.215913 | *  |    |    |    | P | P | P | A |
| 1.586952 |    |    | ** |    |   | P | A | M |
| 2.12126  | *  |    |    | *  | P | P | A | A |
| 1.766042 | *  |    | *  |    | P | P | P | P |
|          |    |    | *  |    | P |   | P |   |
| 2.571955 | ** | *  | *  | *  | P | P | P | P |
| 7.570332 |    |    |    | ** | A |   | A | P |
| 10.28292 |    |    |    | ** |   |   |   | M |
| 0.244513 |    |    |    |    |   |   |   | A |

|          |    |    |    |   |   |   |   |
|----------|----|----|----|---|---|---|---|
| 3.567362 |    |    | *  | * |   | P | P |
| 0.049576 |    |    |    |   | A | A | A |
|          | ** |    |    | M | P | A |   |
|          | ** |    |    |   | P |   |   |
| 0.918644 |    |    |    | P | P | P | P |
| 2.112772 |    |    |    | * | P | P | P |
| 0.6051   |    |    |    | P | P | P | P |
| 0.060047 |    |    |    | P | P | P | A |
| 0.702079 | *  |    |    | P | A | P | A |
|          |    | *  |    | P | A |   |   |
| 3.66123  |    |    |    | * | A |   | P |
| 4.396049 |    | *  | *  | * | A | P | P |
|          |    | *  |    |   |   | P |   |
|          | ** |    |    |   | P |   |   |
|          | *  |    |    | P | P | P |   |
| 3.040101 |    | ** | ** | P | P | P | P |
| 1.490684 |    | *  | *  | P | P | P | P |
|          |    | *  |    | P | P | P |   |
|          | *  |    |    | P |   |   |   |
| 0.341957 |    |    |    | P | P | P | P |
| 0.54632  |    |    |    | P | P | P | M |
|          |    | *  |    | A | P |   |   |
| 5.642304 |    |    | *  |   |   |   | P |
|          | *  |    |    | A | P |   |   |
|          |    |    |    | A | A |   |   |
|          |    |    |    |   | A | A |   |
| 2.001989 |    |    | *  | P | P | M | P |
|          |    |    |    | A |   | A |   |
| 0.388818 |    |    |    | P | P | P | P |
| 0.849573 | *  | ** |    | P |   | P | A |
|          |    |    |    |   |   | A |   |
| 0.41227  |    |    |    | P | P | P | P |
| 0.061566 |    |    |    | P | A | P | A |
| 0.397221 |    |    |    | P | P | P | P |
| 0.224626 |    |    |    | P | P | P | A |
| 0.727008 |    |    |    | P | P | P | P |
| 6.05492  |    |    | *  | P |   | P | P |
| 1.530679 | *  |    |    | P | P | P | P |
|          |    |    |    | P | P | A |   |
| 0.9267   | *  |    |    | P | P | P | P |

|          |   |    |    |    |   |   |   |
|----------|---|----|----|----|---|---|---|
| 0.584909 |   |    |    | P  | P | A | A |
| 0.470503 |   |    |    | P  | P | P | P |
|          | * |    |    | P  |   |   |   |
| 0.584    |   |    |    | A  | M |   | A |
|          |   |    |    | P  | A | A |   |
| 0.488179 |   |    |    | P  | P | P | P |
| 3.25323  |   | *  | ** | *  | A | P | P |
| 0.141811 |   |    |    | P  | P | P | A |
| 0.637479 |   |    |    | P  | A | A | A |
|          |   |    |    |    | A | A |   |
| 1.002177 |   |    |    | P  | P | P | P |
| 1.528475 |   |    | *  | P  | P | P | P |
| 5.816874 |   | *  | ** | *  | P | P | P |
|          |   |    |    | A  | P | A |   |
| 0.217173 |   |    |    | P  | A | P | A |
| 0.700602 |   |    |    | P  | P | P | P |
| 1.708234 |   |    |    | P  | P | A | P |
| 0.409888 |   |    |    | P  | P | P | P |
| 3.97894  |   |    |    | *  | P |   | M |
|          |   |    | *  |    |   | P |   |
| 0.464069 | * |    |    | P  | P | P | P |
| 3.30122  | * |    |    | *  | P | P | P |
| 2.222758 |   |    |    | *  | P |   | P |
| 2.029075 |   |    |    | *  | P | P | P |
| 1.228753 |   |    | *  | P  | M | P | P |
| 0.024043 |   |    |    |    | P | P | A |
| 2.027353 |   |    |    | *  | P | A | P |
|          |   |    |    |    |   | A |   |
| 0.262012 |   | *  |    |    | P |   | A |
|          |   | ** |    |    | M | A |   |
|          |   |    | ** |    |   | P |   |
| 1.33864  | * |    | ** | P  | P | P | P |
| 0.236683 |   |    |    | P  | P | A | A |
| 36.67758 |   | *  | ** | ** | P | P | P |
|          |   |    |    | A  |   |   |   |
| 0.657993 |   |    |    | P  | P | P | P |
| 2.275734 |   |    |    | *  | P | P | P |
| 0.961118 |   |    |    | P  | P | P | P |
| 0.679886 | * |    |    | P  | P | P | P |
|          |   |    |    |    | A | A |   |

|          |    |    |    |    |   |   |   |   |
|----------|----|----|----|----|---|---|---|---|
| 38.86379 | ** | ** | *  | ** | P | P | P | P |
| 1.530844 |    |    | ** |    |   |   | P | A |
|          | ** | ** | *  |    | M | P | P |   |
| 1.637188 | ** |    |    |    | P | P | A | P |
| 2.198104 |    |    |    | *  | P | P |   | P |
| 2.283056 |    | *  |    | *  |   | P | A | P |
| 0.697097 |    |    |    |    | A |   |   | A |
|          | *  |    |    |    | P | A | A |   |
| 4.582064 |    |    | ** | *  | P | P | P | P |
| 3.520742 |    |    | *  | *  | P | A | P | P |
| 2.992688 |    |    |    | ** | P | P | P | A |
|          |    |    | *  |    | A | P | P |   |
|          |    |    |    |    | A |   |   |   |
| 0.020754 |    | *  |    |    | M | M | A | A |
| 1.191999 |    |    |    |    | P | P | P | P |
|          |    | *  |    |    |   | P |   |   |
|          | *  |    |    |    |   | A |   |   |
|          |    |    |    |    | P | P | P |   |
|          |    |    |    |    | P | A | M |   |
| 2.122692 |    |    | *  | *  | P | P | P | P |
| 2.924599 |    |    |    | ** | P |   | P | A |
| 0.712335 |    |    |    |    |   | A | A | A |
| 0.912791 |    |    |    |    | P | P | P | P |
| 3.133708 |    |    |    | ** | M | M | M | P |
|          |    |    |    |    |   | A |   |   |
| 2.577768 |    |    |    | *  | P | P | P | P |
| 2.787527 |    |    |    | *  | A |   |   | P |
| 2.481725 |    |    |    | *  | P | P | P | P |
|          | ** |    |    |    | P |   | A |   |
| 0.376746 |    |    |    |    | P | P | P | A |
| 0.470249 |    |    |    |    | P | P | P | P |
|          |    |    |    |    |   | A |   |   |
| 2.027036 |    |    |    | *  | P | P | P | P |
| 2.512379 |    |    |    | *  | P | A | P | M |
|          |    |    |    |    |   |   | A |   |
| 3.442762 |    |    |    | *  |   | P | A | P |
| 23.84411 |    |    |    | ** |   |   |   | P |
|          |    |    | *  |    | P | P | P |   |
|          |    |    |    |    | P | A | A |   |
|          |    |    |    |    | P | P | A |   |

|          |   |    |    |   |   |   |   |
|----------|---|----|----|---|---|---|---|
| 2.824382 |   |    | *  | P | P |   | A |
| 1.136775 |   | *  |    | P | P | P | P |
| 0.117093 |   |    |    | P |   |   | A |
| 0.958074 |   |    |    | P | P | P | P |
| 2.65474  |   |    | *  | P |   | P | P |
| 0.045225 |   |    |    |   |   | A | A |
|          | * |    |    | A | P | A |   |
|          |   |    |    | P |   | A |   |
| 0.341118 |   |    |    | P |   |   | A |
| 0.424671 |   |    |    | P | P | A | A |
| 2.347832 |   |    | *  | P | P | P | P |
|          |   |    |    | P | P | A |   |
| 2.676452 |   | *  | *  | P |   | P | P |
| 2.113726 |   |    | *  | A | P | P | P |
|          | * |    |    | A | A | A |   |
| 0.795236 |   |    |    | P | P | A | P |
| 1.953323 |   | *  |    | P | P | P | P |
| 1.244341 |   |    |    | P | P | A | P |
| 0.861135 | * |    |    | P | P | P | P |
| 1.294202 |   |    |    | P | P | A | A |
| 1.819186 |   | *  |    | P | P | P | P |
| 2.862202 |   |    | ** |   |   |   | P |
|          |   |    |    | A |   | M |   |
|          |   |    |    |   |   | A |   |
| 1.160776 |   |    |    | P | P | A | A |
| 1.914514 |   | ** |    | P | P | P | M |
|          | * |    |    | P |   |   |   |
|          | * | ** |    | P |   | P |   |
| 2.481155 |   |    | *  | P | P | P | P |
| 1.284275 |   |    |    | P | A | A | P |
| 0.380193 |   |    |    | P | P | P | M |
|          |   |    |    |   | A |   |   |
| 2.247068 |   |    | *  | P | P | P | P |
|          |   |    |    |   |   | A |   |
| 0.302562 |   |    |    | P | P | A | A |
| 0.144375 |   |    |    | P | P | P | A |
| 0.0606   |   |    |    | P | P | M | A |
| 0.46452  |   |    |    | P | P | P | P |
| 0.35587  | * |    |    | P | P | A | A |
| 2.19634  |   | ** | *  |   | A | M | P |

|          |    |    |    |   |   |   |   |
|----------|----|----|----|---|---|---|---|
| 3.721917 |    |    | *  |   | A | M | P |
| 0.579721 |    |    |    | P | P | A | A |
| 0.495074 |    |    |    | P | P | A | A |
|          |    |    |    | P | A | A |   |
| 1.364103 |    |    |    | P | P | P | A |
|          |    |    |    | A | A | A |   |
|          |    |    |    | P | P | P |   |
| 0.41295  |    |    |    | P | P | P | P |
|          |    |    |    | P | A |   |   |
| 0.8215   | *  |    |    | P | P | P | P |
| 3.206512 |    |    | ** | A |   |   | P |
|          |    |    |    | P | A | A |   |
| 0.805261 | *  |    |    | P | P | A | A |
| 0.186775 |    |    |    |   |   | P | A |
| 1.543987 |    |    |    | P |   | A | A |
| 2.639832 |    |    | *  | P | P | P | P |
| 2.348887 |    |    | *  | P | P | P | P |
| 0.357598 |    |    |    | P | P | P | P |
| 1.307159 |    | *  |    | M | P |   | A |
| 6.291786 |    |    | *  |   |   |   | P |
|          |    |    |    | A |   |   |   |
| 1.422568 |    |    |    | P | P | P | P |
| 3.118896 |    |    | ** |   |   |   | A |
|          |    | *  |    |   | P | P |   |
| 3.742894 |    |    | *  | P | P | P | P |
|          |    |    |    | A | A |   |   |
| 0.512919 |    | ** |    |   | P | A | A |
| 0.819761 |    |    |    | P | P | P | P |
| 0.444348 |    |    |    | P | A |   | A |
|          |    |    |    | P | P | P |   |
| 3.51387  |    |    | *  | P |   |   | P |
|          |    | ** |    |   | P |   |   |
| 2.468521 |    |    | *  | P | P | P | P |
| 0.059403 |    | *  |    | A | M | A | A |
|          |    | ** |    |   | P | A |   |
| 2.786481 |    |    | ** | * | P | P | P |
|          |    | *  |    |   |   | P |   |
|          | ** |    |    | M |   |   |   |
|          |    | *  |    |   | P |   |   |
|          |    |    |    |   | A |   |   |

|          |    |    |    |   |   |   |   |
|----------|----|----|----|---|---|---|---|
|          |    |    |    | A | P | A |   |
|          |    |    |    |   |   | A |   |
| 1.468659 |    | *  |    | P | P | A | A |
|          |    |    |    |   | A |   |   |
| 0.854648 | *  |    |    | P | P | P | P |
| 0.958591 |    |    |    | P | P | P | P |
| 1.176324 |    | ** |    |   | P | M | A |
| 1.263923 |    |    |    | P | P | A | A |
|          |    | ** |    | P | P | A |   |
| 0.479831 |    |    |    | P | P | P | M |
| 1.204561 |    |    |    | P | M | A | A |
| 2.124666 |    |    | *  | P | A | P | P |
| 0.406561 |    |    |    | P | P | A | M |
|          |    |    |    | A |   |   |   |
| 1.997862 |    |    | *  | P | P | P | P |
|          |    |    |    | P | A |   |   |
| 0.076783 |    |    |    | P | P | A | A |
| 2.695899 |    |    | *  | A | M | P | M |
| 0.878441 |    |    |    | A | A | P | P |
|          |    | ** |    | A | P |   |   |
|          |    |    |    |   | A |   |   |
| 5.120231 |    |    | *  |   |   |   | P |
| 0.698293 |    |    |    | A | P | A | A |
| 0.645813 |    |    |    | P | P | P | P |
| 0.453481 |    | ** |    | P | A | P | A |
| 2.922043 |    |    | ** | P | P |   | P |
| 0.204716 |    |    |    | P | P |   | A |
| 1.511974 |    | ** |    | P |   | P | P |
| 2.316571 |    |    | *  | P | P | P | P |
| 2.126987 |    |    | *  |   |   | A | A |
|          |    |    |    |   |   | A |   |
|          |    |    |    | A | P | A |   |
| 4.398961 |    | *  | *  | P | P | P | P |
|          |    |    |    | M | P | A |   |
| 3.337137 |    | ** | *  |   |   | M | P |
| 0.384154 |    |    |    |   | A | P | A |
| 2.819083 |    |    | *  | P | P | P | P |
| 1.469218 |    |    |    |   | P | A | A |
| 0.079977 |    |    |    |   |   |   | A |
| 2.207294 | ** |    | *  | P | P | A | P |



|          |    |    |    |   |   |   |   |
|----------|----|----|----|---|---|---|---|
| 0.484925 |    |    |    | P | P | P | A |
|          |    |    |    |   | A | A |   |
| 1.481932 | *  |    |    | P | P | A | A |
| 1.005107 | ** |    |    | P | P | A | P |
| 0.890178 |    |    |    | P | P | P | A |
| 2.208658 |    |    | *  | P | P | A | P |
|          | *  |    |    | A | P |   |   |
| 1.550554 |    | ** |    | P | P | P | P |
|          |    | ** |    |   |   | P |   |
| 0.702044 |    | ** |    | P | A | P | A |
|          |    | ** |    |   |   | M |   |
|          |    |    |    | A | P | P |   |
|          |    |    |    |   | P | A |   |
| 0.600671 |    |    |    | A | P | A | A |
| 0.284475 |    |    |    | P | P | A | M |
| 32.88776 |    |    | ** | P | P | P | M |
| 0.482053 |    |    |    | P | P | P | P |
| 2.31167  | *  | ** | *  |   | P | P | P |
| 7.479241 |    |    | ** | P | A |   | P |
|          |    | ** |    | P | P | M |   |
| 0.342804 |    |    |    | P | P | P | P |
| 0.456067 |    |    |    | P | P | P | P |
| 0.340297 |    |    |    | P | P | A | P |
| 0.551102 |    |    |    | P | P | A | A |
| 0.052382 |    |    |    | P | P | A | A |
| 10.44996 |    |    | ** |   |   |   | P |
|          |    |    |    | P |   |   |   |
|          | *  |    |    | M | P |   |   |
|          |    | *  |    |   | P |   |   |
| 3.158725 |    |    | ** | P | P | P | P |
| 0.265504 | *  |    |    | P | P | P | A |
| 2.578792 |    |    | *  | P | P | P | P |
|          |    |    |    | P | P | P |   |
| 1.193288 | *  | *  |    | P | P |   | A |
|          | ** |    |    | P |   | A |   |
|          |    |    |    | P | A |   |   |
| 2.380786 |    | ** | *  |   | P | P | P |
|          |    | *  |    | A |   | P |   |
| 0.241416 |    |    |    | P | P | P | A |
| 0.429443 |    |    |    | P | P | P | A |

|          |    |    |    |   |   |   |   |
|----------|----|----|----|---|---|---|---|
| 0.469113 |    |    |    | P | P | M | P |
| 0.698112 |    |    |    | P | A | A | A |
| 0.279725 |    |    |    | P | P | P | A |
| 1.006084 | *  |    |    | P | A | A | A |
|          |    | ** |    |   |   | P |   |
|          |    |    |    | A |   |   |   |
| 2.318931 |    |    | *  | P | A | P | P |
| 0.497153 |    |    |    | P | P | P | P |
| 1.23492  | *  |    |    | P | P | P | A |
| 2.307056 |    |    | *  |   |   |   | A |
| 0.263139 |    |    |    | P | P | P | A |
|          |    |    |    |   | P | A |   |
| 1.316458 |    | *  |    |   |   | P | P |
|          |    |    |    | A | P | A |   |
| 1.187405 | *  | *  |    | P | P | P | P |
| 0.254863 |    |    |    | A | P | P | A |
| 1.10836  | *  |    |    | P | P | A | A |
| 2.885585 |    |    | ** | A | M | P | P |
| 1.043053 |    |    |    | P | P | A | A |
|          |    |    |    |   | A |   |   |
| 2.119707 |    |    | *  |   | A |   | P |
| 0.428198 |    |    |    | P | P | P | P |
| 0.037607 |    | *  |    | P | M | A | A |
| 0.490845 | ** |    |    | P | P | P | A |
| 0.772047 | *  |    |    | P | P | P | A |
|          | ** |    |    | P |   | P |   |
|          |    |    |    | P | A | P |   |
| 0.71363  |    |    |    | P | P | P | P |
| 0.249891 |    |    |    | P | P | A | A |
|          | *  |    |    | P | P | P |   |
| 2.397732 |    |    | *  | P |   | A | A |
| 0.255612 |    |    |    | P | P | A | A |
| 4.759576 |    | ** | *  | P |   | P | P |
|          |    |    |    | P |   | A |   |
|          |    | *  |    | P |   | P |   |
| 0.603882 |    |    |    | P | P | P | P |
| 0.680323 |    |    |    | P | P | P | A |
| 0.415043 |    |    |    |   | P |   | A |
| 3.204411 |    |    | ** | P | P |   | M |
|          |    |    |    | P | P | A |   |

|          |   |    |    |   |   |   |   |
|----------|---|----|----|---|---|---|---|
| 0.673472 | * |    |    | P | P | P | A |
| 0.443837 |   |    |    | P | P | P | P |
| 0.88918  |   | ** |    | P | M | A | A |
|          |   |    |    |   | A |   |   |
|          |   |    |    | P | P | M |   |
| 0.294739 |   |    |    | P | P | P | P |
| 0.627457 |   |    |    | P | P | P | P |
| 1.279318 |   |    |    |   | A |   | A |
|          |   | ** |    |   | M |   |   |
| 2.652947 |   |    | *  |   | A |   | P |
|          |   | ** |    |   |   | P |   |
|          |   |    |    | A |   |   |   |
| 1.728995 |   |    |    | P | A |   | A |
| 1.066284 |   |    |    | P | P | A | P |
|          |   |    |    | P | A | A |   |
| 2.0641   |   | *  | *  | P | P | P | P |
| 3.943088 | * |    | *  | P | P | P | P |
| 18.27062 |   | *  | ** | P | P | P | P |
|          |   | *  |    |   | P | P |   |
|          |   |    |    |   | A | A |   |
| 0.945939 |   |    |    | P | P | P | P |
|          |   |    |    | A |   |   |   |
|          |   | *  |    | M | M | A |   |
| 0.459471 |   |    |    | P | M | A | A |
|          |   |    |    |   | A |   |   |
| 2.241518 |   |    | *  | M | P | A | P |
|          |   | *  |    | P | P | M |   |
| 2.661143 |   |    | *  | P | P | P | P |
| 0.957603 |   |    |    | P | P | A | A |
| 0.603143 |   |    |    | P | P | P | A |
| 1.000893 |   |    |    |   | P | A | A |
|          |   |    |    | A | P | A |   |
| 0.391184 |   |    |    | P | P | P | P |
|          |   |    |    | A |   |   |   |
| 3.23256  |   | ** | ** | P | P | P | P |
| 3.088334 |   | *  | ** | P | P | P | P |
|          |   |    |    |   | P | P |   |
| 2.057901 |   |    | *  |   |   |   | P |
|          |   | ** |    |   | P |   |   |
| 0.097201 |   |    |    | P | P | A | A |

|          |    |    |    |    |   |   |   |   |
|----------|----|----|----|----|---|---|---|---|
|          |    | *  |    |    |   | M |   |   |
| 9.202382 |    |    |    | ** |   |   |   | P |
|          |    |    | *  |    | P | A | P |   |
| 8.215985 | *  | ** | ** | ** | P | P | P | P |
|          |    | ** |    |    |   | M |   |   |
| 1.805111 |    |    |    |    |   |   | A | M |
| 0.976152 | *  |    |    |    | P | A | A | A |
| 2.835446 |    |    |    | *  |   |   |   | M |
| 2.393526 |    |    | *  | *  | P | P | P | P |
| 3.67166  |    |    |    | *  | P | P | M | P |
|          |    |    |    |    |   |   | A |   |
| 1.173767 |    |    |    |    |   |   | A | P |
| 0.123051 | ** |    |    |    | P |   |   | A |
|          |    |    |    |    |   | A |   |   |
| 0.904673 | ** |    |    |    | P | P | P | P |
| 0.593692 |    |    |    |    | P | P | P | P |
| 2.862088 |    |    |    | ** |   | A | A | M |
| 0.993028 |    |    |    |    | P |   | A | A |
| 1.382293 |    |    | *  |    |   |   | P | A |
|          |    | *  |    |    | A | P |   |   |
|          |    |    |    |    | P | P | A |   |
| 1.220952 |    |    |    |    | P | P | P | P |
| 1.32353  |    |    |    |    | P | P | P | P |
| 0.058674 |    |    |    |    | A | P | A | A |
|          |    |    |    |    |   | A |   |   |
| 0.399235 |    |    |    |    | P | P | P | A |
| 0.708726 |    |    |    |    | P | P | P | P |
| 0.715047 | *  |    |    |    | P | P | P | P |
| 3.588991 |    |    |    | *  |   |   |   | P |
| 0.769834 |    |    |    |    | P | P | P | P |
| 1.824677 | *  |    |    |    | P | P | P | P |
| 1.954234 |    | *  |    |    | P | P | P | P |
| 0.453222 |    |    |    |    | P | P | P | P |
| 0.313309 | *  |    |    |    | P | P | A | A |
|          |    |    |    |    | A | A |   |   |
|          |    |    |    |    | A | P | P |   |
|          |    |    |    |    |   |   | A |   |
|          | *  |    |    |    | P | P |   |   |
|          | ** |    |    |    | P |   |   |   |
| 0.567596 |    |    |    |    | P | P | P | P |

|          |    |    |  |   |   |   |   |
|----------|----|----|--|---|---|---|---|
|          |    |    |  | A |   |   |   |
| 9.466942 | ** | ** |  | P | P | P | P |
| 0.308378 |    |    |  | P | P | A | A |
|          |    |    |  | P | P | A |   |
| 0.693884 |    |    |  | P | P | P | P |
|          |    |    |  |   | A |   |   |
|          | *  |    |  |   | P |   |   |
| 3.131142 |    | ** |  | P | P | P | P |
| 2.991068 |    | ** |  | P | P | P | P |
|          |    |    |  | A | A | P |   |
| 1.245107 | *  |    |  | A | P | A | P |
| 1.846852 |    |    |  | P | A | A | P |
| 2.286126 |    | *  |  | P | P | P | P |
|          |    |    |  |   | P | A |   |
|          | *  |    |  | P | P | P |   |
|          |    |    |  |   | A |   |   |
| 0.894086 |    |    |  | P | P | P | P |
| 3.941748 |    | *  |  | A |   |   | P |
| 1.193174 |    |    |  | P | P | P | P |
|          |    |    |  | P | P | M |   |
|          | ** |    |  |   | P |   |   |
| 0.694491 |    |    |  | P | P | A | A |
| 1.899619 |    |    |  | P | A |   | P |
|          | *  |    |  | M |   | A |   |
| 0.552237 |    |    |  | A | P | P | A |
| 23.42853 |    | ** |  |   |   |   | P |
| 1.266586 | *  |    |  | P | P | A | A |
|          |    | ** |  |   |   | P |   |
|          |    |    |  |   | P | A |   |
| 1.440101 |    |    |  | P | P | A | P |
| 1.553032 |    |    |  | P | A | A | P |
| 3.483636 |    | *  |  |   |   |   | P |
|          |    |    |  | P | P | P |   |
| 1.688727 |    | ** |  |   |   | P | A |
| 0.392683 |    |    |  | P | P | P | P |
| 0.737094 |    |    |  | P | P | P | A |
| 1.441026 |    | *  |  | P | P | P | P |
| 0.442404 |    |    |  | P | P | A | A |
| 0.63221  |    |    |  | P | P | P | P |
| 27.55266 |    | ** |  |   |   | A | P |

|          |    |    |    |    |   |   |   |   |
|----------|----|----|----|----|---|---|---|---|
|          |    |    | *  |    |   |   | P |   |
|          | *  |    |    |    | P |   |   |   |
| 0.717836 |    |    |    |    | A |   | A | A |
| 2.052967 |    |    | *  | *  | M |   | P | P |
| 1.274858 | *  |    |    |    | P | P | P | P |
|          |    |    |    |    |   |   | A |   |
|          |    |    |    |    | P |   | A |   |
| 0.024509 |    |    |    |    | A | P | A | A |
| 0.474499 |    |    |    |    | P | P | P | P |
|          | ** |    |    |    | M | M |   |   |
| 9.988901 |    |    | ** | ** | P | P | P | P |
| 26.68127 |    |    |    | ** |   |   |   | P |
|          | ** |    |    |    | P |   |   |   |
| 0.800254 |    |    |    |    | P | P | P | P |
| 9.144739 |    |    | ** | ** | P | P | P | P |
|          | *  |    |    |    | M |   |   |   |
|          |    |    | *  |    |   |   | P |   |
| 2.142524 |    |    |    | *  |   | P | A | P |
| 0.690008 |    | *  |    |    | P | P | P | P |
| 2.091132 |    |    | *  | *  | P | P | P | P |
| 2.279173 |    |    |    | *  | P | P | P | P |
|          |    |    |    |    |   |   | A |   |
|          |    |    |    |    | P | P | A |   |
|          |    |    |    |    |   | A |   |   |
| 2.204719 |    |    |    | *  | P | P | P | P |
| 2.847328 |    |    |    | ** | P | P | P | P |
| 1.219992 |    |    | *  |    | P | P | P | P |
|          |    |    |    |    |   |   | A |   |
|          |    |    |    |    | A | M | A |   |
| 0.659311 | *  |    |    |    | P | P | P | P |
|          |    | ** |    |    | A | P |   |   |
| 1.952249 |    |    |    |    | P | P | M | A |
| 1.518633 |    |    |    |    | P | A |   | P |
|          |    |    | *  |    |   |   | M |   |
| 0.494139 |    |    |    |    | P | P | P | P |
|          | ** |    |    |    | P | P |   |   |
| 0.929472 |    |    |    |    | P | P | P | P |
| 8.140944 | *  | *  | ** | ** | P | P | P | P |
| 2.856428 |    |    |    | ** |   |   |   | P |
| 15.57817 |    |    | *  | ** | P | A | P | P |

|          |    |    |    |    |   |   |   |   |
|----------|----|----|----|----|---|---|---|---|
| 2.10804  |    |    |    | *  |   | P |   | M |
| 0.229709 |    |    |    |    | P | P | P | P |
| 0.751671 |    |    |    |    | P | P | M | A |
| 0.332534 |    |    |    |    | P | P | P | A |
| 1.055202 |    |    |    |    | P | P | P | A |
|          |    | ** |    |    |   | P | P |   |
|          |    |    |    |    | P |   | A |   |
|          |    |    |    |    |   |   | A |   |
| 2.140836 |    |    |    | *  |   |   |   | P |
| 0.464265 |    |    |    |    | P | M |   | A |
| 0.091791 |    |    | *  |    |   |   | A | A |
| 1.100455 |    |    |    |    |   |   | A | A |
|          | *  |    |    |    | P |   |   |   |
| 9.367625 | ** | *  | ** | ** | P | P | P | P |
|          |    |    |    |    | A | A | A |   |
|          |    |    |    |    | P |   | P |   |
| 2.816813 |    |    |    | *  | A |   |   | M |
|          |    |    |    |    |   | A |   |   |
| 0.151522 |    |    | *  |    | P |   | P | A |
| 1.302949 |    |    | *  |    | P | P | P | A |
| 0.955783 |    |    |    |    | P | P | P | A |
| 2.149027 |    |    |    | *  | P | P | P | M |
| 2.020394 |    |    | *  | *  | P | P | P | P |
| 0.284064 |    |    |    |    | P | P | P | A |
| 1.346408 |    |    | *  |    | P | P | P | P |
| 0.316722 |    |    | ** |    | P | P | P | P |
|          |    | ** |    |    |   | P |   |   |
| 22.36011 |    |    |    | ** |   |   |   | P |
| 0.876714 |    |    |    |    | P | P | P | P |
| 1.037723 |    |    |    |    | P | P | P | P |
| 0.452334 |    |    |    |    | P | P | P | A |
| 1.030099 |    |    |    |    | P | P | P | P |
| 0.874381 |    |    |    |    | P | P | P | P |
| 38.68812 |    |    |    | ** | P |   |   | P |
| 0.386925 |    |    |    |    | P | P | A | A |
| 0.080641 |    |    |    |    | P |   |   | A |
| 2.296701 |    |    |    | *  | P | P | P | P |
| 0.089544 |    |    |    |    |   | M | A | A |
|          |    |    | ** |    |   |   | P |   |
| 1.151227 |    |    |    |    | P | P | P | A |

|          |   |   |    |    |   |   |   |
|----------|---|---|----|----|---|---|---|
| 0.371305 |   |   |    | P  | P | P | P |
|          |   |   |    |    |   | A |   |
| 0.376443 |   |   |    | P  | P | P | P |
|          |   | * | *  | P  | P | M |   |
| 1.927562 |   |   |    | A  | P | A | A |
| 3.035428 | * |   | ** | ** | P | P | P |
| 0.478753 |   |   |    | P  | P | P | P |
| 1.365093 |   |   |    | P  | P | P | P |
|          |   |   | ** | A  |   | P |   |
| 0.791484 |   |   |    | P  | P | P | P |
|          |   |   |    | A  | A |   |   |
|          |   |   |    | A  |   |   |   |
| 3.020328 |   | * |    | ** | A | P | P |
| 2.001371 |   |   |    | *  | P | P | A |
| 2.025611 |   |   |    | *  | P | P | P |
|          |   |   |    | A  |   |   |   |
|          | * |   |    | P  |   | A |   |
|          |   |   | *  |    |   | P |   |
|          |   |   |    |    | A |   |   |
| 2.343599 |   |   |    | *  | P | P | P |
| 0.37567  |   |   |    |    | P | P | A |
| 0.917792 |   |   |    |    | P | P | P |
| 0.778777 |   | * |    |    | P | P | P |
| 0.164273 |   |   |    |    | P | P | A |
|          |   | * |    |    |   | P |   |
| 1.06263  |   |   | *  |    | P | P | P |
| 0.116466 |   |   |    |    | A | A | A |
| 4.752384 |   |   |    | *  |   | A | P |
| 0.465976 |   |   |    |    | P | P | P |
|          |   |   |    |    |   | A |   |
|          |   |   |    | P  | A | A |   |
| 1.861491 |   |   | *  | A  | P | P | P |
| 0.872945 |   |   |    | P  | P | P | A |
|          |   |   | *  | M  |   | A |   |
|          |   |   |    | P  | A |   |   |
|          |   |   |    |    | A |   |   |
|          |   |   | ** | A  |   |   |   |
|          |   |   |    | P  | P | P |   |
| 0.483135 |   |   |    | P  | P | P | P |
| 0.149043 |   |   |    | P  | P | A | A |



|          |    |    |    |   |   |   |   |
|----------|----|----|----|---|---|---|---|
| 0.893539 |    |    |    | M | P | P | A |
|          |    |    |    |   |   | A |   |
| 0.344752 |    |    |    | P | P | P | P |
| 1.529271 | *  |    | *  | P | P | P | A |
| 0.681608 |    |    |    | P | P | P | P |
| 0.420118 |    |    |    | P | A |   | A |
| 0.713087 |    |    |    | P | P | P | P |
| 0.626827 |    |    |    | P | P | P | P |
| 0.996636 |    |    |    | P | P | P | P |
| 0.48118  |    |    |    | P | P | P | A |
| 0.387454 |    |    |    | P | P | P | P |
|          |    |    |    | A |   | A |   |
|          |    | ** |    |   | P | A |   |
| 0.291252 | ** |    |    | P | P | P | P |
| 0.159475 |    |    |    |   |   |   | A |
| 2.023647 |    |    | *  | P | P | P | P |
| 0.572914 | ** |    |    | M |   |   | A |
| 0.602877 |    |    |    | P | P | P | A |
| 2.066475 |    |    | *  | P | P | P | P |
| 3.984178 |    |    | *  | * | A | P | P |
|          |    |    |    | P | P | P |   |
|          |    |    |    |   | A | A |   |
|          |    |    |    | A | P | A |   |
|          |    |    |    |   |   | A |   |
| 0.36972  |    |    |    | A |   |   | A |
|          |    |    |    | A | P | P |   |
|          |    |    |    |   | P |   |   |
| 1.090908 |    |    |    | P | P | A | P |
| 2.023942 |    |    | *  | P | P | P | P |
|          |    |    |    | P | P | M |   |
| 1.720824 |    |    | *  | M |   | P | A |
|          |    |    |    | P | A | P |   |
| 0.895209 |    |    |    | A | P |   | P |
| 0.357806 |    |    |    |   | P | A | A |
| 12.50189 |    |    | ** | A |   |   | P |
| 2.067476 | *  |    | *  | P | P | P | P |
|          |    |    |    |   | A |   |   |
|          |    |    |    |   |   | A |   |
| 1.856237 |    | ** |    | P | P | P | P |
| 2.035806 |    |    | *  | P | P | P | P |

|          |    |    |    |   |   |   |   |
|----------|----|----|----|---|---|---|---|
|          |    |    |    | A | P |   |   |
| 0.662857 | *  |    |    | P | P | P | P |
| 0.079613 | *  |    |    | P | P | P | A |
| 1.271165 |    |    |    | A | A |   | A |
|          |    |    | ** |   |   | P |   |
|          |    | ** |    |   | M |   |   |
|          |    |    |    | P | A | P |   |
| 0.854962 |    |    | ** | P | P | P | M |
| 0.859363 |    |    |    | P | P | P | P |
| 4.128606 | *  |    |    | * | P |   | P |
| 2.021147 |    |    |    | * | P | P | P |
| 0.489948 | *  | *  |    | P | P | A | A |
| 0.352081 |    |    |    |   | A | A | A |
|          |    |    | ** | P | P | P |   |
|          |    | ** |    |   | P |   |   |
|          |    |    | *  |   |   | A |   |
| 0.968078 | *  |    |    | P | P | P | P |
| 0.61912  |    |    |    | P | P | P | P |
| 0.407663 |    |    |    | P | P | P | P |
| 0.474674 |    | *  |    | A | P | A | A |
| 0.788354 |    |    |    | P | P | P | A |
| 0.495038 |    |    |    | P | P | P | P |
| 3.294006 |    |    |    | * |   |   | P |
| 1.355173 |    |    | *  | P | A | P | P |
| 0.821884 |    |    |    | P | P | P | P |
| 0.309977 |    |    |    | P | P | P | P |
| 0.985347 |    | *  |    | P | P | P | A |
| 0.346233 |    |    |    | M | P |   | A |
|          |    |    |    |   |   | A |   |
| 1.041068 | ** |    |    | P | P | P | P |
| 1.479392 |    |    |    | P | P | P | A |
| 1.930566 |    |    |    | A | A | P | M |
| 0.061758 |    |    |    | P | A | A | A |
| 0.33267  |    |    |    | P | P | P | A |
| 0.481079 |    |    |    | P | P | P | M |
|          | *  |    |    | M |   |   |   |
|          |    | *  |    | A | P | A |   |
|          |    |    |    | P | P | A |   |
| 1.719892 |    |    |    | P | P | P | M |
| 1.573234 | *  |    |    | P | P | P | P |

|          |   |    |    |             |             |             |   |
|----------|---|----|----|-------------|-------------|-------------|---|
| 0.550038 |   |    |    | A<br>P      | P           | P<br>A      | A |
| 2.412229 |   |    | *  |             |             |             | A |
| 3.665973 |   |    | *  | P           | P           | A           | M |
| 24.11799 |   |    | ** |             |             |             | P |
|          |   |    |    | A<br>M<br>A | A<br>A      |             |   |
|          | * |    |    |             |             |             |   |
| 1.565984 |   |    |    | P           | A           | A           | P |
| 0.514074 |   |    |    | P           |             | A           | A |
|          |   | ** |    |             | M           |             |   |
| 0.540802 |   |    |    | P           | P<br>P      | P<br>A      | P |
| 0.83201  |   |    |    | P<br>A      | P           | P           | M |
|          |   |    | *  |             | A<br>P<br>M | P<br>A<br>A |   |
| 1.251304 |   |    |    |             |             |             | A |
| 1.095198 | * |    | *  | M           |             | P           | A |
| 0.711611 |   |    |    |             | P           | A           | M |
| 2.451405 |   |    | *  |             |             | P           | P |
| 17.18894 |   |    | ** |             |             | M           | P |
|          |   |    |    |             |             | A<br>P<br>A |   |
|          |   | *  |    |             |             |             |   |
| 0.89375  |   |    |    | P<br>P<br>A | P<br>P      | P           | P |
|          |   |    |    |             | A           |             |   |
| 0.543074 |   |    |    | P           | P           | P           | P |
| 0.24128  |   |    |    | P           | P           | P           | A |
| 0.313498 |   |    |    | P           | P           | P           | P |
| 2.82478  |   |    | *  |             |             |             | P |
| 0.497441 |   |    |    |             |             |             | A |
| 2.293146 |   | *  | *  | P           | P           | P           | P |
| 2.849304 |   |    | ** | P           | P           | P           | P |
| 0.069655 |   |    |    | P           | P           | P           | A |
| 3.006707 | * | *  | ** | P           | A           | P           | P |
| 0.468042 |   |    |    | P           | P           | P           | A |
| 3.496117 |   | *  | *  | A           | P           |             | P |

|          |    |    |    |   |   |   |   |
|----------|----|----|----|---|---|---|---|
|          | ** |    |    | P | P | A |   |
|          |    |    |    |   |   | A |   |
| 6.52928  |    | *  | ** | A | P | M | P |
|          |    | ** |    |   |   | M |   |
|          |    |    |    | P | P | A |   |
|          | ** |    |    | P | P | A |   |
| 3.820678 |    | *  | *  | A | P |   | P |
| 0.429911 |    |    |    | P | P | A | A |
| 0.84134  |    |    |    | P | P | A | A |
| 0.223214 |    |    |    | A | P | A | A |
| 0.587492 |    |    |    | P | P | P | P |
|          |    | *  |    |   | M |   |   |
|          |    |    |    | P | P | P |   |
|          | *  |    |    | P | P | A |   |
| 0.547989 | *  |    |    | P | P | P | P |
| 2.023379 |    |    | *  |   |   |   | P |
| 0.31708  |    |    |    | P | P | A | A |
|          |    |    |    | A |   |   |   |
| 0.829444 | *  |    |    | P | P | P | A |
|          | ** |    |    | P |   | A |   |
| 2.265713 |    |    | *  |   |   |   | P |
|          |    |    | ** |   |   | P |   |
| 0.66359  |    | *  |    | P | P | A | A |
| 1.561708 |    |    |    | M | P | P | P |
| 0.660368 |    |    |    | P |   | A | A |
| 1.501573 |    |    |    | P | P | M | P |
| 0.121118 | *  |    |    | P | P | A | A |
| 0.444597 |    |    |    | P | P | P | P |
|          | ** |    |    | M |   |   |   |
| 0.808817 |    |    |    |   | P | A | A |
| 0.286069 |    |    |    | P | P | P | P |
|          |    |    |    | P | A |   |   |
| 0.441493 |    |    |    | P | P | P | P |
| 0.665771 |    |    |    | P | P | P | P |
| 1.155562 |    |    |    | P | P | P | P |
| 0.77207  |    |    |    | P | P | A | P |
| 0.241949 |    |    |    | P | A | P | A |
| 0.476514 |    |    |    | P | P | P | P |
|          |    |    |    |   | A |   |   |
| 2.047506 |    | ** | *  |   | A | P | A |

|          |    |    |   |   |   |   |
|----------|----|----|---|---|---|---|
| 0.131722 |    |    | A | P | A |   |
|          |    |    |   | P |   | A |
| 0.930559 | *  |    | P | P | A | A |
|          |    |    |   | A |   |   |
| 0.108704 |    |    | P | P | P | A |
| 14.31433 |    | ** |   |   |   | P |
| 1.855605 |    |    |   | P | A | A |
|          |    |    | A |   |   |   |
| 1.071787 | ** |    | P | P | M | A |
| 0.473684 |    |    | P | P | P | P |
|          |    |    | M | P | A |   |
| 0.639658 |    |    | P | P | P | P |
| 1.366813 |    |    | A | P | A | A |
| 0.470205 |    |    | P | P | P | P |
|          |    |    | A |   |   |   |
| 1.280288 |    |    | P | P | P | A |
| 0.203934 |    | *  | A | A | A | A |
|          |    |    |   |   | A |   |
| 0.052338 |    |    |   |   |   | A |
|          |    | ** |   | M |   |   |
| 0.486893 |    |    | P | P | P | P |
|          |    |    | A |   |   |   |
| 0.616028 |    |    | P | P | P | P |
|          |    |    | A |   |   |   |
|          |    |    | A |   |   |   |
| 0.707105 |    |    | P | P | P | P |
|          |    |    |   |   | A |   |
| 3.237351 |    | ** |   |   |   | M |
|          | *  |    | P |   |   |   |
|          |    |    | A |   |   |   |
| 0.51187  |    |    |   | A |   | A |
|          | *  |    | M | P |   |   |
|          | *  |    | M | A |   |   |
|          |    | *  |   | P |   |   |
|          |    |    | A |   |   |   |
|          |    |    | A |   |   |   |
|          |    |    |   |   | A |   |
|          |    |    | P | P | A |   |
| 0.203797 |    |    | P | P | A | A |

|          |    |    |    |   |   |   |   |
|----------|----|----|----|---|---|---|---|
| 2.264946 |    | *  | *  | P | P | P | P |
| 2.007906 |    |    | *  | A | A |   | A |
| 0.436707 |    |    |    | P | P | P | P |
|          | ** |    |    |   | P |   |   |
| 2.523992 |    |    | *  | P | A |   | P |
| 0.469228 |    |    |    | P | P | P | P |
| 0.786472 |    |    |    | P | P | P | P |
| 0.629249 |    |    |    |   | P | A | A |
| 96.11702 |    |    | ** | A |   |   | M |
|          |    |    |    |   |   | A |   |
| 1.155275 |    |    |    | A |   | A | A |
| 2.611942 |    |    | *  |   | P |   | P |
| 4.140365 |    |    | *  |   | M |   | M |
| 0.241383 |    |    |    | P | A |   | A |
|          |    | ** |    |   |   | P |   |
|          |    |    |    | M | P | A |   |
| 1.121334 |    |    |    | P | P | P | A |
|          | ** |    |    | P |   | P |   |
| 2.0101   |    |    | *  | A | A | P | P |
| 2.262822 |    |    | *  | P |   |   | P |
| 2.475434 |    | *  | *  | P | P | P | P |
| 1.149136 |    | *  |    | P | P | P | P |
| 3.497141 |    |    | *  | P | A | A | P |
|          |    |    |    |   |   | A |   |
| 5.242837 |    | *  | *  | P | P | P | P |
|          |    |    |    |   | A | A |   |
| 1.370378 |    |    |    | A | A | P | P |
|          |    |    |    | A |   | A |   |
|          |    |    |    | A |   |   |   |
| 0.117721 |    |    |    |   |   |   | A |
|          |    | *  |    |   |   | P |   |
| 1.472348 | *  | ** |    | P | P | P | P |
|          |    |    |    | A |   |   |   |
| 0.111903 |    |    |    |   | P | A | A |
| 1.115422 |    |    |    | P | P | A | A |
|          | *  |    |    | P |   | A |   |
|          |    |    |    |   |   | A |   |
| 2.115216 |    | *  | *  | P | P | P | P |
| 2.837102 |    |    | *  | P | P | P | P |
| 3.200384 |    | *  | ** | P | P | P | P |

|          |    |    |    |   |   |   |   |
|----------|----|----|----|---|---|---|---|
| 0.478562 |    |    |    |   | P | M | A |
| 1.010587 |    |    |    | P | P | P | P |
| 0.271416 |    |    |    | P | P | P | A |
|          |    |    |    |   |   | A |   |
| 0.332349 |    |    |    | P | P | P | P |
| 2.205821 |    | ** | *  | M |   | M | P |
| 1.236377 | ** |    |    | P | P | P | P |
| 1.274476 | *  |    |    | P | P | P | P |
|          |    |    |    |   | A | A |   |
| 3.396276 |    |    | *  | P | P | P | M |
| 1.523642 | *  | *  |    | P | P | P | P |
|          |    |    | *  | A | P | A |   |
|          |    |    |    | M | A | A |   |
| 0.139933 |    |    |    |   | A |   | A |
| 0.490641 |    |    |    | P | P | P | P |
|          |    |    |    | A |   |   |   |
| 4.632043 |    |    | *  |   |   |   | P |
|          |    | *  |    | P | P | P |   |
| 3.629968 | *  | *  | *  | P | P | P | P |
| 2.802015 |    |    | *  | P |   | P | P |
| 0.04433  | *  |    |    | P | P | A | A |
| 0.596306 |    |    |    | P | P | P | P |
| 1.11289  |    |    |    | P | P | A | A |
| 0.051204 |    |    |    | P | A | P | A |
|          |    |    |    |   | A |   |   |
| 0.080834 |    |    |    | P | P | A | A |
| 16.66846 |    |    | ** | P | M | P | P |
|          |    | *  |    | P | P | M |   |
|          |    |    |    | P |   | A |   |
|          |    |    |    | P | P | P |   |
|          |    |    |    | A |   |   |   |
| 2.962726 |    |    | ** | P | P | P | P |
|          |    |    |    | A |   |   |   |
|          |    |    |    |   | P |   |   |
| 0.450528 | *  |    |    | P | P | P | P |
| 0.915597 | *  |    |    | P | P | A | A |
| 0.999133 |    | *  |    |   | A | P | A |
|          | ** |    |    | P |   |   |   |
|          |    | *  |    | M |   | A |   |
| 2.320445 |    |    | *  | P | A | P | A |

|          |    |    |    |   |   |   |   |
|----------|----|----|----|---|---|---|---|
| 5.634704 |    |    | *  |   | A | P | P |
|          | *  |    |    | P |   |   |   |
| 0.109115 |    |    |    | P | P | P | P |
| 0.081307 |    |    |    | P | P | A | A |
| 1.522884 |    | ** |    | P | P | P | P |
| 1.212315 |    |    |    | P | P | P | P |
|          |    | ** |    |   |   | M |   |
|          |    | *  |    | A |   | P |   |
|          |    |    |    | A |   |   |   |
|          | ** |    |    | P | P | P |   |
| 0.904611 |    |    |    | P | P | A | M |
|          |    | *  |    |   |   | M |   |
| 0.293101 |    |    |    | P | P | P | P |
|          |    |    |    | A |   |   |   |
|          | ** |    |    | M |   |   |   |
| 3.473995 |    |    | *  | A | A |   | M |
| 2.604671 |    |    | *  | P | M |   | P |
| 0.495904 |    |    |    | P | P | P | P |
| 0.77431  |    |    |    | P | P | P | P |
| 1.637372 |    | ** |    | P | P | P | P |
|          | ** |    |    | P |   | P |   |
| 0.346778 | *  |    |    | P |   | A | A |
|          | *  |    |    | P | A |   |   |
| 0.869033 |    |    |    | P | P | A | A |
| 1.563351 |    |    |    | P |   | A | A |
| 0.470865 |    |    |    | P | P | P | A |
| 0.215647 |    |    |    |   |   |   | A |
| 9.454566 |    | ** | ** |   |   | P | P |
|          |    |    |    |   | A |   |   |
| 1.557318 | ** |    |    | M |   | A | A |
| 1.959018 |    | *  |    |   | A | P | P |
| 0.645666 |    |    |    | A | P | P | A |
| 0.74924  |    |    |    | P | P | P | P |
| 0.677245 |    |    |    |   |   | A | A |
| 0.702895 |    | *  |    | P | P | P | P |
|          | *  |    |    | P |   | P |   |
| 0.377779 |    |    |    | P | P | P | P |
| 0.235005 |    |    |    | P | P | P | M |
| 0.08696  |    |    |    | P | P | A | A |
| 2.304642 |    |    | *  | A | P | A | P |



|          |    |    |    |    |   |   |   |
|----------|----|----|----|----|---|---|---|
| 0.702837 |    |    |    | P  | P | A | P |
| 1.450524 |    | *  |    | P  | P | P | P |
| 0.963466 |    |    |    | P  | A |   | A |
| 0.2101   | *  |    |    | P  | A |   | A |
| 3.3324   |    |    | *  | *  | P | P | P |
| 0.962822 |    |    |    | M  | A | A | M |
| 0.405663 |    |    |    |    |   |   | A |
|          | ** |    |    | P  |   |   |   |
| 0.873717 |    |    |    |    | P | A | A |
| 0.124156 |    |    |    |    |   |   | A |
| 0.377636 |    |    |    | P  | P | P | P |
| 0.678608 |    |    |    | P  | P | P | P |
| 0.870935 | *  |    |    | P  | P | P | P |
| 2.333527 |    |    | *  | *  | P | P | P |
| 1.780205 |    |    |    | P  | P | M | P |
| 2.885708 |    |    |    | ** |   |   | P |
| 0.310102 |    |    |    | P  | P | P | P |
| 0.178137 |    |    |    | P  | P | P | P |
| 0.191498 |    |    |    | P  | P | P | P |
| 1.717535 |    | *  | *  | P  | P | P | P |
|          | *  | *  |    | P  | P |   |   |
|          |    |    |    | A  |   |   |   |
| 2.611908 |    |    |    | *  |   |   | P |
| 3.244955 |    |    |    | *  | A |   | P |
|          |    |    |    |    | A |   |   |
|          |    | *  |    | P  | P | M |   |
| 0.335162 |    |    |    | P  | P | P | A |
| 2.720157 |    | *  | ** | *  | P | P | P |
| 0.326591 |    |    |    | A  | P | P | A |
| 0.892657 |    | *  |    | P  | P | P | P |
| 0.669069 |    |    |    | P  | P | P | A |
| 2.551387 |    |    |    | *  |   |   | A |
| 1.033455 |    | *  |    | P  | P | P | P |
|          | *  |    |    | P  |   |   |   |
| 0.288652 |    |    |    | P  | P | P | P |
|          |    |    |    |    | M | A |   |
| 0.486214 |    |    |    | P  | P | P | P |
|          |    |    |    |    |   | A |   |
|          |    | ** |    | P  | P |   |   |
|          |    |    |    | P  | A | A |   |

|          |   |    |    |   |   |   |   |
|----------|---|----|----|---|---|---|---|
| 0.685928 |   |    |    | P | P | A | P |
|          |   |    |    | A |   |   |   |
| 0.445233 |   |    |    | P | P | P | P |
| 1.420102 |   |    |    | P | P | P | P |
|          |   |    |    | M | P | A |   |
| 3.390272 |   | *  | *  | P | P | P | P |
| 4.604558 |   |    | *  |   |   |   | P |
|          |   |    |    |   | A |   |   |
|          | * |    |    | P |   |   |   |
|          |   |    |    | A | P |   |   |
|          |   | *  |    |   |   | A |   |
| 5.370099 | * | *  | *  | P |   | M | P |
| 5.56563  | * | *  | *  | P |   | P | P |
| 7.64581  |   | *  | ** |   |   | P | P |
|          | * |    |    | M |   |   |   |
|          |   |    |    | A |   | A |   |
|          |   | *  |    |   | P |   |   |
| 0.270492 |   |    |    | P | P | P | A |
| 0.371465 |   |    |    | P | P | P | P |
| 2.055916 |   |    | *  |   |   |   | P |
| 0.333677 |   |    |    | P | P | P | P |
| 0.37698  |   |    |    | P |   | A | A |
| 1.488147 |   | ** |    | P | P | P | P |
| 0.09927  |   |    |    | A |   | A | A |
| 1.659182 |   |    | ** |   |   | P | A |
| 1.361953 |   |    | *  | P | P | P | P |
|          |   | ** |    | A | P | A |   |
| 0.435171 |   |    |    | P | P | P | P |
|          | * |    |    | P | P | P |   |
|          | * |    |    | M | A | P |   |
| 1.227613 |   | ** |    | P | P | P | P |
| 0.581405 |   |    |    | P | P | P | A |
|          |   | *  | ** | P | P | P |   |
| 3.628182 |   |    | ** | P | P | P | P |
| 0.604815 |   |    |    | P | P | P | P |
| 1.240658 | * |    |    | P | P | P | A |
|          | * |    |    | P |   |   |   |
|          |   |    |    | P | A | A |   |
| 1.014348 |   | *  |    |   | M |   | M |
| 0.500931 |   |    |    | P | P | P | P |

|          |    |    |    |    |   |   |   |   |
|----------|----|----|----|----|---|---|---|---|
| 0.769716 |    |    |    |    | P | P | P | P |
| 1.013399 |    |    |    |    | P | P | P | P |
| 2.523243 |    |    |    | *  | P |   |   | P |
| 1.033283 |    |    |    |    | P | P | A | A |
| 0.515757 |    |    |    |    | P | P | P | P |
| 0.281786 |    |    |    |    | P | P | P | A |
|          |    |    |    |    |   | P | A |   |
| 0.294023 |    |    |    |    | P | P | P | A |
|          |    | *  |    |    |   | P |   |   |
| 0.554682 |    | ** |    |    |   | P |   | A |
| 2.411466 |    |    |    | *  |   |   |   | M |
| 0.700885 | *  |    |    |    | P | P | P | A |
| 0.59182  |    |    | *  |    | P | P | P | P |
| 0.789064 |    |    |    |    | A | P | A | A |
| 10.01803 |    |    |    | ** | P | P | M | P |
| 0.72582  |    |    |    |    | P | P | P | P |
|          |    |    |    |    |   |   | A |   |
| 2.972    |    |    | *  | ** | P | P | P | P |
| 0.582625 |    |    |    |    | P | P | P | P |
| 3.17267  |    |    |    | ** |   | A | P | P |
|          | *  |    |    |    | P | M |   |   |
| 0.569222 |    |    |    |    | P | P | P | A |
| 0.455203 |    |    |    |    | P | P | P | P |
| 2.885737 |    |    | *  | ** | P | P | P | P |
|          |    |    | *  |    |   |   | P |   |
| 0.441397 |    |    |    |    | P | P | P | P |
| 1.116557 |    | *  |    |    | P | P | P | M |
|          |    |    |    |    |   | P | A |   |
| 0.428489 |    |    |    |    |   |   |   | A |
| 5.851137 | ** | ** | ** | *  | P | M | P | P |
|          |    |    | ** |    |   |   | P |   |
|          | *  |    |    |    | P |   |   |   |
|          | *  |    |    |    | P |   |   |   |
|          |    |    |    |    | P | P | P |   |
|          | *  |    |    |    | P |   |   |   |
| 0.636145 |    |    |    |    | P | P | P | P |
|          |    |    |    |    | P |   | A |   |
|          | ** |    | ** |    | P |   | P |   |
|          |    |    |    |    | A | P | A |   |
| 2.394374 |    | *  |    | *  | P | P | P | M |

|          |    |    |   |   |   |   |   |
|----------|----|----|---|---|---|---|---|
| 0.356659 |    |    |   | P | P | P | P |
| 2.023816 |    |    | * |   |   |   | P |
| 2.081218 |    |    | * |   | P | A | A |
| 0.781923 |    |    |   | A | P | A | A |
|          |    |    |   | A | P | A |   |
|          |    |    |   |   | M | A |   |
| 0.628328 |    |    |   | A | P |   | P |
| 2.279719 |    |    | * | P | P | M | A |
|          |    | *  |   | A | P |   |   |
| 0.561567 |    |    |   | P | P | P | A |
| 1.144902 |    |    |   | A | P | A | A |
| 2.399022 |    | *  | * | P | P | P | P |
| 1.415264 |    | *  |   |   |   | P | P |
|          |    |    |   | P | P |   |   |
| 0.046691 |    |    |   | P | P | P | A |
| 1.900111 |    |    |   | P | P | P | P |
| 0.651643 |    |    |   | P | P | A | A |
|          |    |    |   | P | P | A |   |
| 2.248971 |    | *  | * | P | P | P | A |
| 2.098736 |    | ** | * | P | P | P | P |
| 1.023687 |    | *  |   |   | A | P | P |
|          |    |    |   | M | P | A |   |
|          |    |    |   | M | M | M |   |
|          |    | ** |   | P | P | P |   |
|          |    | *  |   |   | P |   |   |
| 0.694801 | *  |    |   | P | P | P | A |
| 0.169802 |    |    |   | P | P | P | P |
| 0.268161 |    |    |   | P | P | P | P |
|          |    | ** |   |   | P | A |   |
| 0.191544 |    |    |   | P | P | A | A |
|          |    | *  |   | P |   | P |   |
|          |    | *  |   | M | P | A |   |
|          |    |    |   |   | A |   |   |
| 0.281469 |    |    |   | P | P |   | A |
| 0.424941 |    |    |   | P | A | A | A |
|          | *  |    |   | P | P | M |   |
| 0.99245  |    | *  |   | P | P | A | P |
| 1.783613 | ** | *  |   | M | P | P | P |
| 0.129777 |    |    |   |   |   |   | A |
|          |    |    |   | A | A |   |   |

|          |    |    |    |    |   |   |   |
|----------|----|----|----|----|---|---|---|
| 0.497623 |    |    |    | P  | P | P | P |
|          |    |    |    |    |   | A |   |
| 3.244675 |    |    | ** | *  | P | P | P |
| 0.963138 |    |    | *  |    | P | P | P |
| 1.91324  |    |    | *  |    |   | A | P |
|          |    |    |    |    | A |   |   |
| 3.475717 |    | *  |    | *  |   | P | A |
| 12.05775 |    |    |    | ** |   |   | P |
|          |    |    |    |    | A | A |   |
|          |    |    |    |    |   |   |   |
|          |    |    |    |    |   | A |   |
| 2.873179 |    |    |    |    |   |   |   |
|          |    |    |    |    |   |   |   |
| 0.773143 | *  | *  |    |    | P | P | P |
| 0.467368 |    |    |    |    | P | P | P |
|          | ** |    |    |    | P | P | P |
| 1.165606 |    |    | *  |    | P |   | P |
| 0.041458 |    |    |    |    | A | P | A |
|          |    |    |    |    |   | A |   |
|          |    |    |    |    |   |   |   |
| 3.304767 |    |    |    | *  |   |   | P |
| 2.788776 |    |    |    | *  | P | P | P |
| 2.479776 |    |    | *  | *  |   | A | P |
| 0.496971 |    |    |    |    | P | P | P |
| 3.521131 |    |    |    | *  |   |   | P |
| 2.232608 |    |    |    | *  |   | A | M |
| 0.440546 |    |    |    |    | P | P | P |
| 3.061016 |    |    |    | ** | A | P | A |
| 1.10529  |    |    |    |    | A | P | A |
|          |    |    |    |    |   | A |   |
|          | *  |    |    |    | P | M | P |
| 1.132263 |    |    | *  |    | P | P | P |
|          | *  | *  | *  |    | P | P | P |
| 0.67771  | *  |    |    |    | P | P | P |
| 3.431201 |    |    |    | *  | P | P | A |
|          |    |    |    |    | A |   |   |
| 1.170773 | *  |    |    |    | P | A | A |
|          |    | ** |    |    | A | P |   |
|          |    | ** |    |    |   | P |   |
| 1.693488 |    | *  |    |    | A | P | P |
| 2.453072 |    |    |    | *  | A | A | P |
| 0.817643 |    |    |    |    | P | P | P |
| 1.272193 | ** | *  |    |    | P | P | A |

|          |    |    |    |   |   |   |   |
|----------|----|----|----|---|---|---|---|
| 1.404051 |    |    |    |   | A | A | A |
|          |    |    |    | A | A | A |   |
| 0.836116 |    |    |    | P | P | P | A |
| 0.533773 |    |    |    | P | P | P | P |
|          | ** |    |    | P |   |   |   |
| 0.632527 |    |    |    | P | P | P | A |
| 0.422542 |    |    |    | P | P | P | P |
|          | ** |    |    | M |   |   |   |
|          | ** |    | ** | P | P | P |   |
| 2.273686 |    |    | *  | P | P | P | P |
| 0.773455 |    |    |    | P | P | P | A |
|          |    |    | *  |   |   | P |   |
|          |    | ** |    |   | P |   |   |
|          |    |    |    | P | P | A |   |
|          |    |    |    |   | P | A |   |
| 2.1882   | *  |    | *  | P | A | A | P |
|          |    |    |    | P |   | A |   |
| 0.695531 |    |    |    | P | P | P | P |
|          |    |    |    | A | A | P |   |
| 0.237516 |    |    |    | P | P | P | A |
| 1.212179 |    |    |    | P | P | A | A |
| 0.382035 |    |    |    | P | P | P | P |
|          | *  |    |    | P |   |   |   |
| 0.486046 |    |    |    | P | P | P | P |
| 5.07491  |    |    | *  |   |   |   | M |
| 2.624662 |    |    | *  | P | P | P | P |
| 1.781343 |    |    |    | P | P | P | M |
|          |    | *  |    |   | M |   |   |
| 13.26123 |    |    | ** | A |   |   | M |
|          |    |    |    | A |   |   |   |
| 1.744061 |    |    |    | A |   |   | P |
|          |    |    |    |   | A |   |   |
|          |    |    |    | P | P | P |   |
|          |    |    |    | P | A | A |   |
| 1.021574 | *  |    |    | P | P | A | A |
| 0.042044 |    |    |    | A | P | P | A |
|          |    |    |    |   |   | A |   |
|          |    |    |    | P | A | A |   |
|          |    |    |    |   |   | A |   |
| 1.106384 |    | *  | *  | P | P | P | P |

|          |    |    |    |   |   |   |   |
|----------|----|----|----|---|---|---|---|
|          |    |    |    | A | P | A |   |
|          |    | ** |    |   | M |   |   |
| 2.857155 |    |    | ** | P |   | P | P |
| 2.201866 |    |    | *  | P | P | A | P |
| 2.476494 |    |    | *  | A |   | A | P |
|          |    | ** |    |   | P |   |   |
| 0.695646 |    |    |    | P | P | P | P |
| 2.866015 |    |    | ** | P |   |   | P |
|          |    | *  | *  |   | P | P |   |
| 0.131271 |    |    |    | P | P | M | A |
| 0.899348 |    |    |    | P | A | A | A |
|          |    |    | ** |   |   | P |   |
|          |    |    |    | P | P | A |   |
| 0.769457 | *  |    |    | P | P | A | P |
| 3.431852 |    | *  | *  |   | P | P | P |
| 6.467054 |    |    | *  |   |   |   | P |
| 0.956526 | *  |    |    | P | P | P | P |
| 1.229326 |    |    |    | P | P | P | P |
| 0.733938 | ** |    |    | P | P | P | P |
|          |    |    | *  | A |   | P |   |
| 8.015425 |    |    | *  | P | P | P | P |
|          |    |    | *  |   | A | P |   |
| 0.744386 |    |    |    | P | P | P | A |
| 0.782304 |    |    |    |   | P | A | A |
| 6.270834 |    |    | *  |   |   |   | P |
| 1.161537 |    |    |    |   | P | M | P |
|          |    |    |    |   | A | A |   |
| 0.451649 |    |    |    | P | P | A | A |
|          |    | ** |    | P | P | P |   |
| 1.008813 |    |    |    | M |   | A | A |
|          |    | *  |    |   | P | P |   |
| 0.737957 |    |    |    | A |   | A | A |
| 2.328142 |    | *  | *  | P |   | P | P |
| 2.146106 |    |    | *  |   | A | M | P |
| 2.127794 |    | ** | *  |   |   | P | P |
| 1.293029 |    | *  |    | A |   | P | A |
| 1.068362 | *  |    |    | P | P | P | A |
| 3.104065 |    |    | ** | P | P | A | P |
| 0.457447 |    |    |    | P | P | P | P |
| 3.88915  |    |    | *  | P | P | P | P |

|          |   |    |    |    |   |   |   |
|----------|---|----|----|----|---|---|---|
| 1.212663 |   |    |    | P  | A | A | P |
| 2.34965  | * |    | *  | P  | P | P | P |
| 0.352973 |   |    |    | P  | A | A | A |
| 1.15261  |   |    | *  | P  | P | P | P |
|          |   |    | ** |    | A | A |   |
| 0.277681 |   |    |    | P  | P | P | A |
| 1.788768 | * |    | *  | P  | P | P | P |
|          | * |    |    | M  |   |   |   |
| 1.405739 | * |    |    | P  | P | A | P |
| 0.789434 |   | ** |    | A  | P | A | A |
| 2.262303 |   |    | *  | P  | P | P | M |
|          |   |    |    |    |   | A |   |
| 2.916691 |   |    | *  | ** | A | P | P |
| 0.122302 |   |    |    |    | P | P | A |
| 3.705871 |   |    | ** | *  | P | P | P |
| 5.334021 |   |    | ** | *  | M | M | P |
| 0.198494 |   |    |    |    | P | P | A |
| 1.964581 |   |    |    |    | P | P | P |
|          |   |    | *  |    | A |   |   |
| 4.504955 |   |    |    | *  |   |   | P |
| 1.65278  | * |    |    |    | P | P | P |
| 3.944318 |   |    |    | *  | P | A | P |
|          |   |    |    |    | A | A |   |
| 20.6789  |   |    | ** | ** | A | A | P |
| 1.967601 |   | ** |    |    |   | P | P |
|          |   |    |    |    | P | A |   |
| 1.130339 |   |    |    |    |   | P | A |
| 1.337473 |   |    |    |    | A | P | P |
|          |   |    | ** |    |   | P |   |
| 2.265301 |   |    |    | *  | P | P | P |
|          |   |    |    |    |   | A |   |
| 0.439334 |   |    |    |    | P | P | P |
| 2.282888 |   |    |    | *  | P | P | P |
| 0.838976 |   |    |    |    | P | A | M |
| 4.14294  |   |    |    | *  | P | P | P |
| 2.440781 |   |    |    | *  | P | P | P |
|          |   |    |    |    |   | P |   |
|          |   |    |    |    | P | P |   |
| 2.480106 |   | *  | *  | *  | P | P | P |



|          |    |    |    |   |   |   |   |
|----------|----|----|----|---|---|---|---|
|          |    |    |    | A | A |   |   |
|          |    |    |    |   |   | A |   |
| 0.661721 |    |    |    | P | P | P | P |
| 1.304874 | ** |    |    | P | P | P | P |
| 0.472844 |    |    |    | P |   |   | A |
| 0.390137 |    |    |    | P | P | P | P |
|          |    |    |    | A |   |   |   |
| 1.033319 |    | ** |    |   | P | P | A |
| 0.853315 |    |    |    | P | P | A | P |
| 0.212467 |    |    |    |   | P |   | A |
| 0.668021 | ** |    |    | P | A | A | A |
| 2.958583 |    | ** | ** | P | P | P | P |
| 0.672245 |    |    |    | P | P | P | P |
| 1.443927 |    | ** |    | A | P | P | A |
| 2.821716 |    | *  | *  | P |   | P | M |
| 5.751699 |    |    | *  |   |   |   | P |
|          |    |    |    |   | A |   |   |
| 5.693438 |    |    | *  | P | P | A | M |
| 1.068542 | ** | *  |    | P | P | P | A |
|          |    |    |    |   |   | A |   |
| 1.432715 |    |    |    | P | P | P | A |
| 0.257147 |    |    |    | P | P | A | A |
| 0.297814 |    |    |    |   | P | P | A |
|          | *  |    |    | P |   | A |   |
|          |    |    |    |   | A | A |   |
| 0.573793 |    |    |    | P | P | A | P |
|          | *  |    |    |   | P | A |   |
|          |    |    |    |   | P | A |   |
| 0.28679  |    |    |    | A |   |   | A |
|          |    | ** |    |   | A | P |   |
| 2.000649 |    |    | *  | P | P | M | M |
| 0.598706 |    |    |    | A | P |   | A |
| 48.75513 |    |    | ** |   |   |   | P |
| 0.403211 |    |    |    | P | P | P | P |
| 2.160894 |    |    | *  | P | P | P | P |
| 0.61537  |    |    |    | P | P | P | P |
| 1.443135 | *  |    |    |   | P | A | M |
| 0.175906 |    |    |    | P | P | A | A |
| 1.634175 |    |    |    | P | P | A | A |
| 0.129687 | *  | *  |    | P | P | P | A |

|          |    |    |    |   |   |   |   |
|----------|----|----|----|---|---|---|---|
| 6.988173 | *  | ** | ** | P | P | P | P |
| 0.508574 |    |    |    | A | P | A | A |
| 1.461176 |    |    |    |   | P | A | P |
| 0.715864 |    |    |    | P | P | A | M |
|          |    |    |    |   | A |   |   |
| 0.043652 |    |    |    | A | P | A | A |
| 0.475776 |    |    |    | P | P | P | A |
| 0.170869 |    |    |    | P | P | P | A |
|          |    | ** |    |   |   | P |   |
|          |    |    |    | A |   |   |   |
| 0.304252 |    |    |    | P | P | P | P |
|          |    |    |    | P | P | P |   |
| 1.900465 |    | *  |    | P | P | P | P |
| 0.453287 |    |    |    | P | A |   | M |
| 1.621503 |    |    |    | P | P | P | P |
| 0.519235 |    |    |    | P | P | P | A |
| 0.207972 |    |    |    | P | P | A | A |
| 1.527274 |    | ** |    | A |   | P | A |
| 0.415599 |    |    |    | P | P | P | P |
| 0.198517 |    |    |    | P | P | P | P |
| 0.403189 |    |    |    | A | P | P | A |
| 6.170281 | ** | *  | *  | P | P | P | P |
|          | ** |    |    | P |   |   |   |
| 2.058799 |    | *  | *  | P | P | P | P |
| 0.260581 |    |    |    | P | P | A | A |
| 0.862184 |    | *  |    | P | P | A | M |
|          |    |    |    |   | P | A |   |
| 1.127554 |    |    |    | P | P | M | P |
|          | ** |    | ** | M |   | P |   |
| 1.434252 |    |    |    | P | P | P | P |
|          |    |    |    | P | A | P |   |
| 3.592017 |    | ** | *  |   |   | P | P |
| 0.624575 |    |    |    | P | P | P | P |
| 0.343408 |    |    |    | P | P | A | P |
|          | ** |    |    |   | P | A |   |
| 0.065029 |    |    |    | P | P | P | A |
| 3.235976 |    |    | ** |   |   | A | P |
|          |    |    |    | M | P | A |   |
| 0.389347 |    |    |    | P | P | P | A |
|          | *  |    |    | A | P |   |   |

|          |    |    |    |   |   |   |   |
|----------|----|----|----|---|---|---|---|
| 2.04837  |    |    | *  | M | P | P | A |
| 1.484922 |    |    |    | P | P | P | P |
|          | *  |    |    | P | A |   |   |
| 0.561928 |    |    |    | P | P | P | P |
| 0.177321 |    |    |    | P | P | P | P |
| 0.288339 |    |    |    | P | P | A | P |
|          |    | *  |    |   | P |   |   |
|          |    |    |    | P | A |   |   |
| 2.516551 |    |    | *  | P | P | P | P |
| 0.030488 |    |    |    |   | M |   | A |
| 0.371647 |    |    |    | P | P | P | M |
|          | ** |    |    | P | P |   |   |
|          |    |    |    |   | A |   |   |
| 1.03612  |    |    |    | P | P | P | A |
| 0.432834 |    |    |    | P | P | P | A |
|          |    |    |    |   | P | A |   |
| 8.566382 | *  |    | ** | P |   | A | P |
|          |    | ** |    |   | P |   |   |

---

) indicates  $p < 0.01$

| 7DPI_infected_NS | 14DPI_infected_NS | 21DPI_infected_NS | 28DPI_infected_NS | 7DPI_control_call | 14DPI_control_call | 21DPI_control_call | 28DPI_control_call | 7DPI_control_NS |
|------------------|-------------------|-------------------|-------------------|-------------------|--------------------|--------------------|--------------------|-----------------|
| 10.19552         | 10.44202          | 10.15067          | 9.203243          | P                 | P                  | P                  | P                  | 10.17334        |
|                  |                   | 5.87543           | 6.89289           |                   |                    | A                  | A                  |                 |
| 10.18994         | 9.491895          | 11.08423          | 10.38642          | P                 | P                  | P                  | P                  | 9.123819        |
| 7.869158         | 7.183572          | 7.311364          | 7.144451          | P                 | P                  | P                  | P                  | 6.552074        |
| 5.340441         | 5.820564          |                   |                   | A                 | A                  |                    |                    | 5.567853        |
| 9.058316         | 8.328654          | 9.277551          | 10.37327          | P                 | P                  | P                  | P                  | 8.808737        |
| 7.945015         | 7.533454          | 8.302444          | 8.590382          | P                 | P                  | P                  | P                  | 7.871104        |
| 7.180375         | 7.015988          | 7.185454          | 8.453822          | P                 | P                  | P                  | P                  | 7.449307        |
| 7.77819          | 7.870155          | 7.178321          | 8.152087          | P                 | P                  | P                  | P                  | 8.413168        |
| 6.432982         | 6.628202          | 7.556384          | 7.255614          | P                 | P                  | A                  | P                  | 6.665473        |
| 5.050903         |                   |                   | 5.358536          | A                 |                    |                    | P                  | 4.67063         |
|                  |                   |                   | 6.468948          |                   |                    |                    | A                  |                 |
|                  | 5.2754            |                   |                   |                   | A                  |                    |                    |                 |
| 9.140626         | 8.374593          | 7.719557          | 7.396269          | P                 | P                  | P                  | P                  | 8.361067        |
| 9.629493         | 10.38474          | 7.871738          | 8.283577          | P                 | P                  | P                  | P                  | 9.696231        |
| 7.548789         | 6.550621          | 7.751795          |                   | P                 | P                  | A                  |                    | 5.681376        |
| 7.386525         | 7.875166          | 7.544212          | 7.513964          | P                 | P                  | P                  | A                  | 6.584799        |
| 7.56174          | 5.623045          | 6.710955          |                   | P                 | A                  | P                  |                    | 5.588543        |
| 7.298696         | 6.68151           | 6.999373          | 7.408869          | P                 | A                  | P                  | M                  | 6.384976        |
| 9.347846         | 10.17532          | 9.309629          | 8.234849          | P                 | P                  | P                  | P                  | 9.864399        |
|                  |                   | 0.974133          |                   |                   |                    | M                  |                    |                 |
| 8.995587         | 7.876212          | 10.71628          | 10.57613          | P                 | P                  | P                  | P                  | 7.846148        |
| 6.812044         |                   | 4.97065           | 6.75226           | A                 |                    | P                  | P                  | 5.62951         |
| 7.627664         | 9.09724           | 7.687954          | 7.344914          | P                 | P                  | P                  | P                  | 8.943914        |
| 6.782747         | 6.841561          | 6.672761          | 5.220653          | P                 | P                  | P                  | P                  | 6.575118        |
|                  |                   |                   | 6.191106          |                   |                    |                    | A                  |                 |
| 10.88641         | 10.96394          | 10.79022          | 9.786455          | P                 | P                  | P                  | P                  | 10.74468        |
| 7.592851         | 8.176988          | 7.62833           | 6.589697          | P                 | P                  | P                  | P                  | 7.473492        |
| 4.836482         | 5.061822          |                   | 5.998832          | A                 | P                  |                    | P                  | 5.751135        |
| 5.630283         | 5.101179          | 3.290595          | 4.914375          | A                 | P                  | P                  | P                  | 5.8502          |
|                  |                   | 2.923512          |                   |                   |                    | P                  |                    |                 |
|                  |                   |                   | 6.953981          |                   |                    |                    | A                  |                 |
| 7.749697         | 7.160522          | 8.485636          | 8.151689          | P                 | P                  | P                  | P                  | 7.25697         |
| 8.24639          | 7.30022           | 8.596507          | 8.259504          | P                 | P                  | P                  | P                  | 7.426035        |

|          |          |          |          |   |   |   |          |
|----------|----------|----------|----------|---|---|---|----------|
| 5.221299 | 5.855993 | 5.595351 | 6.183768 | P | P | P | 6.536495 |
|          |          | 5.442345 |          |   | M |   |          |
| 4.588681 | 5.463547 | 5.596523 | 5.646377 | P | A | P | 6.255781 |
|          | 5.553836 |          |          | A |   |   |          |
| 5.656951 | 4.389317 | 5.223449 | 4.986383 | A | P | P | 6.20431  |
| 7.103898 | 6.430776 | 6.900175 |          | A | A |   | 6.37335  |
|          |          | 5.110023 | 6.07276  |   | P | A |          |
| 12.15432 | 12.04144 | 10.8329  | 11.148   | P | P | P | 12.23087 |
| 5.860395 | 5.370818 | 4.74336  | 6.322329 | A | P | P | 6.008336 |
| 5.851858 | 5.388761 | 5.5044   |          | P | A |   | 6.501575 |
| 5.942143 | 6.994704 | 5.565408 |          | P | P |   | 7.197939 |
| 6.536578 | 4.348002 | 6.319188 | 7.205226 | A | P | M | 6.387747 |
| 6.496949 | 6.723972 | 6.592407 | 7.539631 | P | P | P | 7.218712 |
|          |          | 6.291156 |          |   | A |   |          |
|          | 5.161308 |          | 7.634851 | P |   | A |          |
| 10.22438 | 10.24927 | 9.202819 | 8.297502 | P | P | P | 10.09152 |
|          |          |          | 4.64862  |   |   | P |          |
|          |          | 2.201722 |          |   | P |   |          |
| 8.203019 | 8.082799 | 7.361718 | 7.06379  | P | P | P | 7.561062 |
| 5.712471 | 6.007329 | 5.965035 | 7.618601 | P | P | P | 6.919668 |
| 10.92767 | 10.86923 | 11.55864 | 12.72397 | P | P | P | 11.76264 |
| 8.118186 | 8.226439 | 8.778431 | 8.820941 | P | P | P | 8.1298   |
| 7.466178 | 7.468671 | 5.709704 | 6.327739 | P | P | P | 6.486038 |
|          | 6.452875 | 2.278011 |          | P | P |   |          |
| 6.811854 | 5.29429  |          | A        | P |   |   | 5.434175 |
|          | 7.315909 |          |          | A |   |   |          |
| 9.892212 | 10.1959  | 10.85409 | 11.24344 | P | P | P | 10.36713 |
| 8.104098 | 6.74503  | 7.81375  | 7.751305 | A | A | P | 5.433383 |
| 6.41662  |          |          | A        |   |   |   | 3.737211 |
|          |          | 6.848228 | 6.605898 |   | A | A |          |
| 6.991458 | 6.906173 | 6.573959 | 6.383831 | P | P | P | 6.536452 |
| 8.247705 | 8.446955 | 7.885915 | 7.629051 | P | P | P | 7.688804 |
| 6.154773 | 7.268832 | 5.710077 | 6.597411 | P | P | P | 7.124134 |
|          | 4.539296 |          |          | P |   |   |          |
|          | 6.274386 | 2.089324 |          | A | P |   |          |
| 5.406928 |          | 4.281526 | A        |   | P |   | 4.511457 |
| 4.672141 |          |          | P        |   |   |   | 5.83819  |
| 8.534125 | 7.388354 | 8.439219 | 7.541097 | P | P | P | 8.523251 |
| 8.516584 | 8.921233 | 6.986962 | 7.69666  | P | P | P | 9.112239 |
|          |          | 6.860167 |          |   |   | A |          |

|          |          |          |            |   |   |   |          |
|----------|----------|----------|------------|---|---|---|----------|
| 9.853878 | 10.08499 | 13.44281 | 13.27418 P | P | P | P | 10.73818 |
|          | 6.342151 |          |            | A |   |   |          |
| 7.466798 | 6.964422 | 6.454434 | 7.258049 A | P | P | A | 4.076213 |
| 6.590661 | 5.942315 | 6.400131 | 6.597618 P | P | P | A | 4.964596 |
| 5.905698 |          | 6.396262 | 7.748756 P |   | A | P | 6.431142 |
| 9.24182  | 9.208154 | 9.510045 | 10.45184 P | P | P | P | 9.473198 |
|          | 5.746144 |          | 5.473174   | P | P | P |          |
| 9.993662 | 10.20581 | 10.63791 | 11.98132 P | P | P | P | 10.51232 |
| 5.199297 |          | 5.975376 | 7.878969 P |   | A | A | 5.729189 |
|          | 5.174463 | 5.733468 | 7.133697   | P | P | A |          |
| 6.123968 | 5.250085 | 6.721136 | 7.877607 A | A | P | A | 4.843829 |
|          |          |          | 7.212179   |   |   | A |          |
| 7.451132 | 6.37497  | 8.619824 | 8.354482 P | P | P | P | 7.676189 |
|          | 5.10507  |          | 6.97426    | A |   | A |          |
| 9.322163 | 9.424512 | 10.46248 | 10.8156 P  | P | P | P | 9.738547 |
| 5.78228  |          | 6.201715 | 6.905055 P |   | A | A | 5.430679 |
| 5.451757 | 4.869734 | 3.283114 | A          | P | P |   | 2.767879 |
| 8.764896 | 8.679855 | 10.34506 | 10.78149 P | P | P | P | 8.617351 |
| 8.339369 | 8.254387 | 7.289122 | 7.409915 P | P | P | P | 7.356222 |
| 5.167586 | 5.865573 |          | 6.663303 P | M |   | M | 6.58875  |
|          |          | 6.027762 |            |   | A |   |          |
| 6.145665 | 5.966895 | 6.326151 | 5.635666 A | P | A | P | 5.112278 |
| 6.829692 |          |          | A          |   |   |   | 5.744432 |
| 10.95596 | 10.3138  | 11.01911 | 10.93816 P | P | P | P | 10.61974 |
| 8.306446 | 8.142502 | 8.36478  | 7.377304 P | P | P | P | 7.702239 |
| 7.697441 | 6.619581 | 5.550181 | 6.585313 P | P | P | A | 6.731342 |
| 8.169925 | 9.068368 | 8.649623 | 9.21398 P  | P | P | P | 9.708975 |
| 12.35301 | 12.80418 | 11.84354 | 10.49829 P | P | P | P | 12.35079 |
| 8.077975 | 8.666151 | 8.412108 | 9.813703 P | P | P | P | 8.717099 |
| 8.282548 | 8.670761 | 7.768466 | 6.462511 P | P | P | P | 8.177462 |
| 6.401093 | 6.405356 | 6.074625 | 4.580219 P | P | P | P | 6.91221  |
| 6.226595 | 6.354614 | 7.919    | 7.264885 P | P | P | P | 6.562213 |
|          | 2.136063 |          |            | M |   |   |          |
| 7.516038 | 6.466514 | 9.03768  | 8.642921 P | P | P | P | 7.994825 |
| 9.982952 | 9.070684 | 9.9287   | 9.607872 P | P | P | P | 8.958486 |
| 7.527276 | 7.19723  | 6.814374 | 8.279195 P | P | P | P | 7.202623 |
| 6.783157 | 5.523508 | 6.863627 | 8.343666 P | P | A | P | 6.884738 |
| 6.527641 | 5.48838  | 6.604015 | A          | P | A |   | 1.717061 |
| 6.154102 | 5.935264 | 5.665946 | 6.355922 P | M | M | A | 5.65077  |
|          | 3.907815 |          |            | P |   |   |          |

|          |          |          |            |   |   |   |          |
|----------|----------|----------|------------|---|---|---|----------|
| 6.963479 | 7.92844  |          | M          | A |   |   | 8.141035 |
|          | 4.894723 |          | 2.916733   | P |   | P |          |
|          |          | 7.607892 |            |   | A |   |          |
| 5.02355  | 5.997695 | 5.036035 | 6.326386 P | P | P | P | 5.567527 |
| 5.487656 | 6.162546 | 2.444228 | 6.668099 P | P | P | P | 7.01884  |
| 11.7347  | 10.84651 | 12.87935 | 12.21868 P | P | P | P | 10.01189 |
| 11.32145 | 10.09722 | 11.85798 | 11.22119 P | P | P | P | 9.518676 |
| 12.35814 | 10.54862 | 12.18766 | 12.4887 P  | P | P | P | 9.73886  |
| 5.968882 | 6.704934 | 6.596448 | 5.16718 P  | P | P | P | 6.920212 |
|          | 5.134634 | 6.055885 |            | P | A |   |          |
| 6.024968 | 5.827    | 5.930145 | P          | A | P |   | 6.7528   |
| 7.0471   | 7.232215 | 7.293792 | 6.160204 P | P | P | P | 7.028945 |
| 6.152758 | 6.740793 | 6.644293 | 7.789558 P | P | P | P | 7.538539 |
| 8.661873 | 7.710557 | 8.757257 | 8.937649 P | P | P | P | 8.351258 |
|          |          | 1.717393 |            |   | P |   |          |
| 5.990211 | 7.360409 | 7.003361 | 6.073711 M | P | A | P | 6.310453 |
| 5.931435 | 6.615542 | 6.26336  | 7.635505 P | P | P | P | 6.604744 |
| 5.049074 | 5.268912 |          | 7.044928 A | A |   | A | 6.105579 |
| 4.260842 | 5.015634 | 5.254735 | P          | P | A |   | 5.425874 |
| 5.119562 |          |          | 4.821864 M |   |   | P | 5.004971 |
|          | 6.780409 |          |            | A |   |   |          |
| 7.953152 | 8.258173 | 7.713885 | 7.168808 P | P | P | P | 7.468382 |
| 7.674783 | 7.802867 | 8.822968 | 8.417908 P | P | P | P | 8.150927 |
|          | 2.933254 |          |            | P |   |   |          |
| 6.522948 | 7.432809 | 7.21114  | 7.047172 P | P | P | A | 6.86092  |
| 8.867084 | 8.547066 | 9.665875 | 10.10673 P | P | P | P | 9.238896 |
| 2.061417 |          |          | P          |   |   |   | 4.585197 |
| 7.797827 | 7.925959 | 7.563447 | 6.74099 P  | P | P | P | 7.996146 |
| 6.948925 | 7.394367 | 6.61592  | 6.712123 P | P | P | P | 6.995891 |
|          |          | 6.264974 |            |   | A |   |          |
|          | 4.7376   |          |            | A |   |   |          |
|          |          | 2.476115 |            |   | M |   |          |
| 4.76402  | 6.445652 |          | 5.775965 P | P |   | P | 5.898199 |
| 3.78484  | 5.102393 |          | P          | M |   |   | 6.233017 |
| 9.495484 | 10.33006 | 8.719105 | 9.000872 P | P | P | P | 9.599017 |
| 6.697106 | 6.845548 | 5.76543  | 6.671606 A | P | P | P | 6.072988 |
| 7.694259 | 6.550422 | 6.573374 | 6.294148 P | P | P | P | 6.163626 |
|          |          |          | 6.103604   |   |   | A |          |
|          |          |          | 6.26464    |   |   | A |          |
| 6.446546 | 6.90976  | 7.461266 | 6.632216 M | P | A | P | 6.559971 |

|          |          |          |          |   |   |   |          |
|----------|----------|----------|----------|---|---|---|----------|
|          |          | 1.22149  |          |   | P |   |          |
| 5.435325 | 5.155597 | 4.853    | P        | P | P |   | 6.113618 |
| 2.089049 |          | 6.202733 | P        |   |   | M | 5.070547 |
| 2.223744 |          |          | P        |   |   |   | 6.302059 |
| 6.392759 | 6.933596 | 7.388696 | 8.596776 | P | P | P | 7.717759 |
| 3.440191 |          |          | P        |   |   |   | 5.482317 |
| 6.4529   | 6.380021 | 6.653887 | 6.558361 | P | P | P | 6.762498 |
| 5.75999  |          | 5.611066 | 6.586301 |   | A | P | 5.622142 |
| 6.216097 |          | 7.278794 | 6.513004 |   | M | A | 6.970865 |
|          |          |          | 7.156475 |   |   | A |          |
|          | 7.236851 | 4.784671 |          | P | P |   |          |
| 5.318459 |          | 6.693955 | P        |   | P |   | 5.661888 |
|          |          | 2.900639 |          |   | P |   |          |
| 8.434054 | 9.164177 | 8.721424 | 8.652944 | P | P | P | 9.365153 |
| 2.412044 |          |          | P        |   |   |   | 6.408917 |
|          |          |          | 6.377364 |   |   | A |          |
| 7.151233 | 7.407493 | 6.121975 | 6.808879 | P | P | P | 7.698962 |
| 6.449732 | 6.151517 | 6.905981 | 7.463621 | P | A | A | 5.771017 |
|          |          |          | 6.442003 |   |   | A |          |
| 6.1337   | 5.39204  | 6.152886 | 5.879417 | M | M | P | 4.942534 |
| 10.12836 | 9.530589 | 10.80163 | 10.25124 | P | P | P | 9.494625 |
| 4.752561 | 5.214846 | 5.675242 |          | P | A |   | 5.978349 |
| 4.355779 | 5.957533 | 5.213491 | 6.619472 | P | P | A | 5.792598 |
|          |          |          | 7.777931 |   |   | A |          |
| 10.2164  | 10.69647 | 10.69671 | 9.329535 | P | P | P | 10.74012 |
|          |          | 4.709342 |          |   | P |   |          |
| 6.634409 | 7.771317 | 7.299015 | 7.434187 | M | P | P | 7.516706 |
|          |          | 0.693225 |          |   | M |   |          |
| 7.962647 | 7.57548  | 8.039053 | 7.583454 | P | P | P | 6.686965 |
| 7.516577 | 6.510406 | 6.999213 | 6.31978  | P | M | P | 6.974856 |
|          |          | 1.641052 |          |   | P |   |          |
| 7.960582 | 8.826316 | 8.423087 |          | P | P |   | 8.142833 |
| 6.048516 |          |          | A        |   |   |   | 3.521149 |
| 8.267514 | 7.466241 | 8.111597 | 8.066409 | P | P | A | 6.72609  |
| 8.592906 | 9.645218 | 7.288332 | 8.111849 | P | P | P | 9.39606  |
|          | 2.835962 |          |          | M |   |   |          |
| 7.69412  | 8.351718 | 6.073227 | 6.197248 | P | P | P | 7.320686 |
| 5.754233 | 6.567256 | 5.842991 | 7.102788 | P | P | P | 6.045313 |
|          |          | 4.731326 |          |   | P |   |          |
| 3.689136 |          |          | M        |   |   |   | 5.920373 |



|          |          |          |          |   |   |   |   |          |
|----------|----------|----------|----------|---|---|---|---|----------|
| 6.084058 | 6.370958 | 6.182412 |          | A | A | P |   | 4.004493 |
| 4.248593 | 5.966365 | 6.143773 |          | P | P | P |   | 6.937639 |
| 5.54959  | 5.16617  | 5.880364 | 6.836155 | P | P | P | A | 5.19483  |
| 5.170098 | 5.757313 |          | 5.375532 | A | P |   | P | 3.669806 |
| 12.05602 | 10.72822 | 11.68353 | 10.98604 | P | P | P | P | 9.912792 |
| 11.14274 | 11.45008 | 12.21705 | 12.64446 | P | P | P | P | 11.49343 |
| 8.439894 | 7.950279 | 8.122702 | 6.483186 | P | P | P | P | 7.52348  |
| 6.968368 | 7.032764 | 6.450823 | 7.611822 | P | P | A | A | 7.48567  |
|          |          | 5.693169 |          |   |   | P |   |          |
| 7.647809 | 6.276005 | 6.448779 | 7.211878 | A | P | P | P | 6.529079 |
| 7.118356 | 7.383309 | 5.220309 | 7.469307 | P | P | P | P | 7.538558 |
|          | 7.051194 |          | 5.363249 |   | A |   | P |          |
| 5.716615 | 6.019434 | 5.231947 |          | A | P | P |   | 5.985519 |
| 7.33878  | 6.866508 | 7.563283 | 4.276892 | P | P | P | P | 7.605757 |
| 5.843411 | 5.800316 | 4.273842 | 3.898989 | A | A | P | P | 5.114724 |
| 5.543703 | 4.843362 |          |          | A | P |   |   | 5.207876 |
| 6.300794 | 5.372182 | 6.051527 | 6.264265 | P | P | P | P | 6.389622 |
| 5.849332 | 6.109345 | 7.031479 | 6.055831 | P | P | P | A | 7.048279 |
| 9.005889 | 8.177651 | 8.653124 | 8.403584 | P | P | P | P | 8.929328 |
| 7.370705 | 6.864622 | 6.518011 | 7.338022 | A | P | P | M | 7.549224 |
| 7.35135  | 7.711071 | 9.215995 | 9.451736 | M | P | P | P | 7.192093 |
| 9.037547 | 10.11599 | 10.35411 | 9.63136  | P | P | P | P | 10.26202 |
| 6.286078 | 8.355001 | 7.727142 | 6.746294 | P | P | A | P | 9.087907 |
| 13.31986 | 13.47182 | 12.98895 | 12.53889 | P | P | P | P | 13.40069 |
|          | 5.66703  |          |          |   | A |   |   |          |
| 8.883907 | 8.529493 | 10.23036 | 9.645453 | P | P | P | P | 8.50561  |
| 6.171732 | 5.678871 | 6.570808 | 7.417784 | P | P | P | P | 5.892048 |
| 3.502266 | 1.130793 | 5.109034 | 6.993838 | P | P | P | A | 5.814282 |
| 5.416606 | 6.200632 |          |          | A | P |   |   | 3.970386 |
| 9.908573 | 9.925227 | 10.58607 | 10.23566 | P | P | P | P | 9.963752 |
| 8.688234 | 6.772537 | 7.698347 | 8.04709  | P | P | P | P | 6.931093 |
| 5.718673 | 7.398443 | 6.300371 | 6.975147 | P | P | P | P | 6.644754 |
| 10.20769 | 10.55043 | 10.14097 | 9.362302 | P | P | P | P | 10.87502 |
| 5.195469 |          | 2.1719   |          | M |   | P |   | 5.154551 |
|          |          |          | 6.231991 |   |   |   | A |          |
|          | 0.447682 |          |          |   | P |   |   |          |
|          | 5.503285 |          | 3.457004 |   | A |   | P |          |
| 7.398865 | 7.724563 | 7.745752 | 6.869695 | P | P | P | P | 7.803828 |
| 8.907894 | 7.136502 | 8.007368 | 7.743215 | P | P | P | P | 6.324692 |
| 4.469041 |          |          |          | A |   |   |   | 2.042639 |

|          |          |          |            |   |   |   |          |
|----------|----------|----------|------------|---|---|---|----------|
| 5.242381 | 3.943102 |          | P          | P |   |   | 5.575216 |
|          |          |          | 7.091685   |   |   | A |          |
| 11.4249  | 11.11993 | 11.88006 | 12.77533 P | P | P | P | 11.49627 |
|          |          | 3.88088  |            |   | P |   |          |
| 5.59084  | 5.525632 | 6.268907 | 5.590643 P | P | A | P | 6.312186 |
| 8.180417 | 9.321405 | 7.562434 | 7.931281 P | P | P | P | 8.829086 |
| 9.418139 | 8.343335 | 9.358934 | 9.497806 P | P | P | P | 10.03723 |
| 6.30432  | 4.203345 | 4.971504 | 4.974643 A | P | P | M | 6.518472 |
|          | 6.244909 |          | 3.811582   | A |   | P |          |
| 7.829891 | 9.001061 | 9.55802  | 10.46106 P | P | P | P | 9.919712 |
| 8.593522 | 9.522251 | 9.910079 | 11.11587 P | P | P | P | 10.68532 |
| 7.249528 | 8.063613 | 8.464512 | 10.28425 P | P | P | P | 9.361233 |
| 4.715025 | 5.504808 |          | P          | A |   |   | 5.848046 |
| 8.151629 | 7.561651 | 7.94801  | 5.711833 P | P | P | P | 7.693973 |
| 7.209423 | 7.172917 | 8.012745 | 8.688533 P | P | P | P | 6.774798 |
| 10.65063 | 10.33593 | 11.15221 | 11.07505 P | P | P | P | 10.73959 |
| 5.998353 | 4.391201 | 6.828497 | 7.456349 P | M | P | P | 6.734899 |
| 6.414286 | 6.885235 | 7.4624   | 7.553618 P | P | P | A | 7.011392 |
|          | 6.286989 | 5.749656 | 7.211048   | A | P | A |          |
| 6.92069  | 6.949799 | 7.986658 | A          | P | P |   | 5.827863 |
| 5.575677 |          |          | 4.569265 P |   |   | P | 6.950281 |
|          | 5.787681 |          | 2.907382   | A |   | P |          |
| 8.787448 | 8.849051 | 9.749845 | 9.491881 P | P | P | P | 8.334847 |
| 10.11608 | 9.610468 | 10.61997 | 11.04099 P | P | P | P | 9.98179  |
| 8.226836 | 9.12602  | 8.588738 | 10.45575 P | P | P | P | 8.728602 |
|          | 6.72605  |          | 5.631059   | A |   | P |          |
| 5.544718 | 6.482714 | 6.556786 | 7.208283 P | P | P | P | 7.040241 |
| 4.419368 | 5.734278 | 3.791675 | A          | P | P |   | 5.037242 |
| 9.349168 | 8.442202 | 8.194585 | 7.980591 P | P | P | P | 8.945566 |
| 6.352335 | 5.514657 | 5.360622 | 7.275647 P | A | A | A | 5.993949 |
| 5.687704 | 6.25557  |          | 6.693228 P | P |   | A | 6.094008 |
| 7.371164 | 7.54639  | 6.546873 | 6.787643 P | A | P | P | 7.265788 |
| 6.445435 | 7.097113 | 7.830333 | A          | P | A |   | 7.0646   |
| 11.2245  | 11.74485 | 10.13935 | 10.33195 P | P | P | P | 11.85278 |
|          |          | 6.136512 |            |   | A |   |          |
| 5.665358 | 5.960337 | 1.931311 | P          | P | P |   | 6.124005 |
| 4.53558  | 5.313524 |          | A          | A |   |   | 3.098548 |
| 5.944202 | 5.107907 |          | A          | M |   |   | 4.400391 |
|          | 5.833432 |          | 3.758412   | A |   | M |          |
| 6.403868 |          | 4.092956 | 6.753793 P |   | P | M | 6.524954 |

|          |          |          |            |   |   |   |          |
|----------|----------|----------|------------|---|---|---|----------|
|          |          | 5.65913  |            |   | A |   |          |
|          |          | 5.18363  |            |   | A |   |          |
| 11.80145 | 10.41708 | 11.2111  | 11.27247 P | P | P | P | 9.889642 |
|          |          |          | 6.161259   |   |   | A |          |
|          | 6.366881 | 3.610093 |            | P | P |   |          |
| 7.228903 | 7.030108 | 6.900016 | 5.152928 P | P | P | P | 7.075385 |
| 7.628032 | 7.509823 | 8.526021 | 9.488286 P | P | P | P | 6.904258 |
| 11.89572 | 11.7446  | 12.47016 | 13.27825 P | P | P | P | 12.19188 |
| 6.409072 | 5.742075 |          | 6.403368 A | P |   | P | 2.363192 |
|          | 5.468703 | 5.649668 | 5.981179   | P | P | P |          |
|          |          |          | 3.418877   |   |   | M |          |
| 6.64205  | 6.130558 | 6.213054 | A          | P | P |   | 6.918463 |
| 6.440528 | 6.984342 | 6.647697 | A          | A | P |   | 6.971642 |
| 5.6847   |          |          | A          |   |   |   | 4.493208 |
| 7.722472 | 6.879088 | 6.943975 | 8.684674 P | P | P | P | 6.557006 |
| 6.07668  |          | 1.752079 | 4.908649 A |   | P | P | 2.911025 |
|          | 5.712858 | 3.534807 |            | P | M |   |          |
| 7.321257 | 6.712443 | 7.891542 | 9.130097 P | P | A | M | 6.912208 |
| 11.62529 | 11.32883 | 11.96337 | 11.92445 P | P | P | P | 11.08882 |
| 6.466658 | 6.479715 | 6.165949 | 5.228648 P | P | P | P | 6.479719 |
| 5.746062 | 5.30662  |          | P          | A |   |   | 7.005695 |
| 6.231037 | 6.248829 | 6.648698 | 7.316859 P | P | P | P | 7.419868 |
| 9.517656 | 10.20542 | 9.398709 | 9.793812 P | P | P | P | 9.573833 |
| 10.94039 | 11.63322 | 10.88239 | 10.24414 P | P | P | P | 11.34938 |
| 6.337191 | 4.791228 | 4.442082 | A          | P | P |   | 5.507232 |
| 6.102066 | 6.524292 |          | 5.421204 P | A |   | P | 4.690173 |
| 6.093342 | 7.929726 | 6.744377 | 6.824848 P | P | P | P | 7.209654 |
|          | 5.555366 |          | 2.874012   | A |   | M |          |
| 8.402868 | 8.210231 | 10.21102 | 10.60853 P | P | P | P | 8.463395 |
| 7.056506 | 6.635574 |          | 7.653964 A | P |   | A | 6.689162 |
| 6.674583 | 6.159718 | 8.047718 | 7.180329 P | P | P | A | 6.571575 |
|          |          | 4.626692 |            |   | P |   |          |
|          |          |          | 6.649663   |   |   | A |          |
| 7.586669 | 6.238334 | 5.400101 | 6.297284 P | P | P | P | 7.308343 |
| 7.21644  | 6.951771 | 7.161758 | 7.288119 A | P | P | P | 6.041634 |
| 8.991995 | 9.692628 | 9.709286 | 8.220081 P | P | P | P | 9.511215 |
|          |          |          | 6.591949   |   |   | A |          |
| 5.329679 | 6.499101 | 7.220989 | 7.838605 A | P | P | A | 5.856291 |
|          |          |          | 7.940187   |   |   | A |          |
| 6.533763 | 8.693751 | 8.192336 | 7.308607 P | P | P | P | 7.90709  |

|          |          |          |          |   |   |   |          |
|----------|----------|----------|----------|---|---|---|----------|
| 9.914557 | 10.53429 | 11.16535 | 10.37811 | P | P | P | 10.91918 |
| 5.923435 |          | 6.918151 | P        |   | A |   | 6.83737  |
| 9.090892 | 9.091206 | 8.461024 | 6.94924  | P | P | P | 8.219162 |
| 6.574399 | 6.326169 |          | 7.541215 | A |   | A | 6.244214 |
| 6.098426 | 5.800787 | 6.41153  | A        | A | P |   | 0.27343  |
| 4.893044 |          | 6.337366 | A        |   | A |   | 3.641799 |
| 6.123597 | 6.707409 | 6.389357 | P        | P | P |   | 7.405189 |
| 8.979094 | 8.717618 | 9.442549 | 10.03995 | P | P | A | 8.979353 |
| 5.219058 |          | 6.559165 | 7.595762 |   | A | A | 5.339061 |
| 6.409057 | 5.773882 | 7.663843 | 7.742651 | P | P | P | 6.654456 |
| 5.538338 | 5.10479  | 5.755496 | 6.112375 | P | P | A | 5.790039 |
| 5.846028 | 5.143311 | 5.788141 | 1.826749 | M | P | P | 5.115143 |
|          |          |          | 6.758716 |   |   | A |          |
| 5.929328 |          | 5.761282 | 3.397422 |   | P | P | 4.67056  |
|          | 4.212531 |          |          | P |   |   |          |
|          |          |          | 6.046415 |   |   | A |          |
| 6.471489 |          |          | A        |   |   |   | 1.620722 |
|          | 5.550486 |          | 6.127326 | P |   | A |          |
| 6.636792 | 6.666526 | 7.135706 | 5.012856 | A | P | P | 6.457637 |
|          |          |          |          |   | P |   |          |
| 7.31267  | 7.299024 | 5.722937 | 6.844235 | P | P | P | 7.485473 |
| 8.950353 | 9.354768 | 9.481104 | 8.986341 | P | P | P | 8.716661 |
| 8.446416 | 7.818905 | 7.824672 | 7.671041 | P | P | P | 7.075246 |
| 12.07995 | 12.2638  | 12.92496 | 12.78254 | P | P | P | 12.40464 |
| 9.169569 | 8.268591 | 8.444799 | 7.705104 | P | P | P | 7.954042 |
| 11.96947 | 11.53466 | 11.23862 | 10.63917 | P | P | P | 11.45139 |
| 6.69126  | 6.709709 | 6.192618 | 7.248542 | P | P | P | 6.831784 |
| 5.236257 |          |          | 6.926269 |   |   | A | 4.988434 |
| 6.808619 | 7.429825 | 7.000296 | 6.629626 | P | P | P | 7.162395 |
| 5.041979 | 5.007744 | 0.613439 | M        | A | P |   | 5.426878 |
| 9.210625 | 9.22556  | 8.357532 | 8.458833 | P | P | P | 7.946937 |
| 11.42138 | 11.76214 | 13.33437 | 12.48747 | P | P | P | 10.22042 |
|          |          |          | 8.94941  |   |   | A |          |
| 9.140346 | 9.651889 | 8.33488  | 8.928095 | P | P | P | 9.516835 |
|          |          | 5.761352 |          |   | A |   |          |
| 8.272027 | 7.793399 | 7.625096 | 6.890878 | P | P | P | 6.955973 |
| 13.58533 | 12.3948  | 13.69667 | 14.07786 | P | P | P | 11.89319 |
| 6.687202 | 6.666305 | 6.001247 | 7.311815 | P | P | P | 7.521759 |
| 7.261016 | 6.681977 | 6.86021  | 5.832937 | P | P | P | 6.374197 |
| 6.847146 | 6.784895 | 6.559155 | 6.219825 | M | P | P | 6.191149 |

|          |          |          |          |   |   |   |          |
|----------|----------|----------|----------|---|---|---|----------|
| 7.616837 | 6.628074 | 7.504902 | 7.715877 | P | P | P | 7.651315 |
| 5.5888   |          |          | A        |   |   |   | 4.139291 |
| 5.643623 | 5.481796 | 5.618067 | 4.214555 | P | A | P | 5.558521 |
| 7.178925 | 7.46165  | 6.042458 | P        | P | P |   | 6.33017  |
| 5.415624 |          | 5.425572 | 5.666992 | A | P | P | 5.369777 |
| 9.419651 | 8.258732 | 10.06096 | 10.19951 | P | P | P | 8.830188 |
| 6.661175 |          | 6.915637 | P        |   | A |   | 6.74854  |
| 6.196812 | 6.346943 |          | 7.273496 | A | P | A | 5.231348 |
| 6.005891 | 5.917171 | 6.478329 | 6.873077 | P | P | P | 6.331766 |
| 5.917469 | 6.732068 | 6.043148 | 6.769003 | P | P | P | 6.963438 |
|          |          | 2.968476 |          |   | P |   |          |
| 6.929052 | 6.520635 | 7.624891 | 6.335977 | P | P | P | 5.615348 |
| 6.626017 | 6.301109 | 7.457314 | 7.108271 | P | P | P | 6.67     |
|          | 8.094563 | 5.663914 | 4.832012 | P | P | P |          |
| 5.956003 | 6.301715 | 5.575096 | A        | M | P |   | 6.593038 |
| 6.037275 | 5.979606 |          | A        | A |   |   | 5.580893 |
|          | 3.705971 |          | 5.806822 | P |   | P |          |
| 5.233456 | 4.393003 |          | 3.810835 | P |   | P | 6.561534 |
| 7.641659 | 6.177872 | 7.252044 | 7.291448 | A | P | P | 6.011947 |
|          | 6.735206 | 6.056801 | 7.386857 | P | P | M |          |
|          |          | 4.901935 |          |   | M |   |          |
| 10.65247 | 10.71738 | 10.16532 | 9.548753 | P | P | P | 10.50452 |
| 6.66918  | 6.358814 | 5.317378 | A        | P | P |   | 5.578111 |
| 7.156756 | 7.504629 | 6.278886 | 6.865437 | P | P | P | 6.344502 |
| 5.865552 | 5.731733 | 6.658803 | 8.106676 | P | A | P | 6.764967 |
| 8.292181 | 8.198064 | 8.848559 | 8.940103 | P | P | P | 8.541921 |
| 3.317006 |          |          | M        |   |   |   | 5.324449 |
|          |          | 2.004019 |          |   | P |   |          |
| 7.904194 | 8.645357 | 7.337902 | 7.564246 | P | P | P | 7.895771 |
| 7.02973  | 6.90474  | 5.783177 | P        | A | P |   | 6.537613 |
| 3.963008 |          | 5.757019 | 6.458566 | P | P | A | 6.320172 |
| 5.847794 | 5.491915 | 6.461749 | A        | P | A |   | 5.532324 |
| 4.396702 | 5.883374 | 4.619321 | P        | A | P |   | 5.77292  |
| 6.055345 | 6.474405 | 6.585105 | 7.326961 | P | P | P | 6.281651 |
| 13.84731 | 12.0281  | 13.37022 | 13.68757 | P | P | P | 11.62218 |
| 5.868878 | 6.138454 | 5.968836 | 7.415858 | P | P | A | 6.526041 |
|          |          | 6.497965 |          |   | A |   |          |
|          |          |          | 6.88302  |   |   | A |          |
| 5.88721  | 5.850379 | 6.300551 | P        | A | A |   | 5.868078 |
| 9.054264 | 7.889476 | 8.4739   | 7.865559 | P | P | P | 8.383453 |

|          |          |          |          |   |   |   |          |
|----------|----------|----------|----------|---|---|---|----------|
| 8.044243 | 9.390333 | 7.124292 | 7.227927 | P | P | P | 8.195724 |
|          |          | 7.16913  |          |   | A |   |          |
| 3.202198 | 5.371583 | 6.165858 | P        | A | P |   | 6.051423 |
|          | 6.08375  | 6.727676 | 7.563032 | A | P | A |          |
| 10.26036 | 9.946313 | 11.10204 | 10.72209 | P | P | P | 10.06709 |
| 8.535996 | 9.504983 | 10.17225 | 10.36805 | P | P | P | 10.06985 |
| 7.197844 | 7.678616 | 7.975863 | 8.317156 | P | P | M | 8.056562 |
|          | 3.622553 |          | 2.754697 | P |   | P |          |
|          | 2.902167 | 1.365055 | 5.6876   | P | M | A |          |
| 5.967985 | 6.028215 | 5.757724 | 4.026344 | P | P | P | 6.475689 |
|          |          | 5.506033 |          |   | A |   |          |
| 6.884345 | 5.866072 | 6.256548 | 4.834218 | P | P | P | 7.153105 |
| 10.55117 | 10.59526 | 10.00456 | 9.19905  | P | P | P | 10.53078 |
| 5.524159 |          |          | A        |   |   |   | 2.89341  |
| 7.913583 | 6.725061 | 7.523604 | 7.477042 | P | P | P | 7.096997 |
| 7.214019 | 6.537294 | 7.612658 | 6.782726 | P | P | P | 6.397345 |
| 13.02234 | 13.16868 | 13.59901 | 14.41521 | P | P | P | 13.38471 |
| 5.749712 | 5.343021 |          | 7.468749 | A |   | A | 2.994979 |
| 9.995097 | 8.939212 | 9.279233 | 8.791585 | P | P | P | 8.787545 |
| 6.503769 |          | 8.268364 | 7.749143 |   | A | A | 5.744591 |
| 10.4749  | 11.38063 | 10.46624 | 9.798432 | P | P | P | 10.90965 |
| 7.07999  | 7.426467 | 7.121543 | 7.826413 | P | P | M | 6.932516 |
| 8.123837 | 7.788732 | 7.566188 | 6.893521 | P | P | P | 8.156725 |
| 8.300953 | 7.710596 | 7.906061 | 8.184534 | P | P | P | 7.835594 |
| 7.641114 | 7.474031 | 7.712669 | 6.757253 | A | M | P | 7.205403 |
| 5.941019 | 4.514678 | 5.284392 | A        | P | P |   | 4.806254 |
|          |          |          | 4.245997 |   |   | M |          |
| 7.533266 | 7.525061 | 8.026473 | 8.657248 | P | P | P | 7.95273  |
| 6.045629 |          | 6.298545 | 6.261904 |   | A | A | 6.736979 |
| 5.139473 | 3.641232 | 5.664194 | A        | P | P |   | 4.252075 |
| 6.830294 | 7.436408 | 7.814993 | 8.081591 | P | P | A | 7.032973 |
| 10.18165 | 10.38892 | 11.07418 | 11.51592 | P | P | P | 10.4969  |
| 6.192996 | 5.681642 | 6.706765 | 10.56724 | P | P | P | 6.43204  |
| 6.625043 | 6.240646 | 2.674496 | 6.602724 | P | P | P | 6.735828 |
| 6.620715 |          | 7.327522 | A        |   | A |   | 5.620523 |
| 8.624628 | 9.018524 | 9.540962 | 9.478622 | P | P | P | 9.658045 |
| 5.846728 |          | 6.769555 | M        |   | A |   | 6.713106 |
| 8.312557 | 6.793429 | 8.321827 | 9.336741 | P | P | P | 7.589641 |
| 6.940513 | 6.011355 | 6.40049  | 6.753511 | P | P | P | 6.019668 |
| 7.501759 | 7.028533 | 6.57472  | 4.707073 | P | P | P | 7.067106 |

|          |          |          |          |   |   |   |          |
|----------|----------|----------|----------|---|---|---|----------|
| 8.000759 | 6.669641 | 7.289714 | 7.433852 | P | M | P | 6.870633 |
| 11.52496 | 10.95427 | 11.45641 | 10.84872 | P | P | P | 11.37592 |
| 9.963205 | 9.019562 | 8.506312 | 8.600421 | P | P | P | 9.200099 |
| 7.200759 | 7.531766 | 8.748276 | 9.198609 | P | P | P | 7.722035 |
| 6.010331 |          | 6.063838 | P        |   | A |   | 5.130721 |
| 2.861096 |          |          | P        |   |   |   | 5.897964 |
| 6.686002 | 6.088226 | 4.702746 | 6.359865 | P | P | P | 7.250467 |
| 10.29443 | 9.994052 | 10.66035 | 9.826086 | P | P | P | 10.53177 |
|          | 3.596494 |          |          | P |   |   |          |
| 11.36167 | 10.84694 | 10.46757 | 10.04595 | P | P | P | 10.14628 |
| 13.05462 | 14.0466  | 14.04826 | 13.75641 | P | P | P | 14.53362 |
| 7.27393  | 7.736049 | 7.32064  | 4.789722 | P | P | P | 8.085347 |
| 7.756    | 8.724668 | 8.539115 | 7.548965 | P | P | P | 9.001102 |
| 8.27289  | 7.931452 | 8.346421 | 8.308789 | P | P | P | 7.423398 |
|          | 5.760134 |          |          | A |   |   |          |
| 12.15901 | 11.16714 | 13.10353 | 13.40744 | P | P | P | 11.17769 |
| 8.059449 | 6.860434 | 6.150189 | 4.279927 | P | P | P | 7.594104 |
| 7.310738 | 5.713304 | 6.1454   | 5.23225  | P | P | P | 6.002263 |
| 7.581719 | 7.372334 | 6.637153 | 7.028576 | P | P | P | 7.18993  |
| 7.366225 | 7.629789 | 6.955311 | 6.965277 | P | P | P | 7.30135  |
| 10.61529 | 11.35605 | 11.55055 | 11.30101 | P | P | P | 11.63365 |
| 10.88243 | 10.02883 | 12.14799 | 12.94745 | P | P | P | 10.38382 |
| 11.55735 | 11.28889 | 10.33807 | 10.0946  | P | P | P | 11.31918 |
| 5.803676 | 4.649035 | 5.527059 | 7.027145 | P | P | A | 5.77422  |
| 13.4121  | 13.89265 | 9.793674 | 11.371   | P | P | P | 13.83062 |
| 11.81002 | 12.49571 | 7.973481 | 9.063156 | P | P | P | 11.55572 |
| 9.97647  | 11.312   | 10.38922 | 9.605777 | P | P | P | 11.19805 |
| 7.06924  | 6.422321 | 5.700354 | P        | P | P |   | 7.194183 |
| 7.441012 | 8.414093 | 7.865471 | 7.739314 | P | P | P | 8.544322 |
| 6.140588 | 6.748228 | 6.310883 | 6.296283 | P | P | P | 6.252164 |
| 7.12773  | 6.26892  | 5.420044 | 8.250765 | P | P | P | 7.490075 |
| 3.550044 | 5.582895 | 5.727534 | 6.084127 | P | P | A | 5.637192 |
|          | 6.942998 | 8.220986 | 8.219666 | P | A | A |          |
| 10.0478  | 8.123398 | 9.000769 | 8.54254  | P | P | P | 8.277911 |
| 5.898353 | 5.519217 |          | 7.44307  | P |   | A | 6.376064 |
| 5.089698 | 5.417732 |          | M        | A |   |   | 5.694126 |
| 12.55862 | 13.03004 | 13.49781 | 13.34288 | P | P | P | 13.08331 |
| 9.531095 | 9.866449 | 7.97117  | 8.428164 | P | P | P | 9.35035  |
| 7.521486 | 6.820001 | 6.316276 | 5.753938 | P | P | P | 7.540676 |
| 9.109683 | 9.019892 | 9.010259 | 7.880228 | P | P | P | 9.272687 |

|          |          |          |          |   |   |   |          |
|----------|----------|----------|----------|---|---|---|----------|
| 7.340313 | 7.088058 | 7.928536 | 8.397651 | P | P | P | 7.727907 |
| 7.627918 |          | 7.539885 | A        |   | P |   | 6.365359 |
| 9.460483 | 8.321991 | 8.762734 | 8.765642 | P | P | P | 8.288818 |
| 9.532741 | 7.639241 | 11.93197 | 11.0204  | P | P | P | 9.192357 |
| 9.972405 | 8.86305  | 12.23922 | 11.63647 | P | P | P | 9.4591   |
| 10.81794 | 11.58087 | 10.51436 | 9.447087 | P | P | P | 11.45567 |
| 7.891865 | 6.833173 | 8.209592 | 8.891302 | P | P | P | 6.813773 |
| 13.13683 | 12.95414 | 14.01855 | 14.39751 | P | P | P | 13.26478 |
| 7.037609 | 6.483871 | 7.053372 | 7.592912 | P | P | P | 6.674199 |
| 8.141874 | 7.89422  | 9.021138 | 9.612237 | P | P | P | 8.049771 |
| 7.738267 | 9.129523 | 8.523797 | 6.543715 | P | P | P | 7.813057 |
| 8.663759 | 9.047932 | 10.27554 | 10.12709 | P | P | P | 9.348311 |
| 10.59628 | 10.28526 | 11.40358 | 11.13492 | P | P | P | 9.75965  |
| 10.72701 | 10.56576 | 11.86065 | 11.57909 | P | P | P | 10.03936 |
| 9.307277 | 9.512268 | 10.10261 | 11.30503 | P | P | P | 9.469079 |
|          |          |          | 3.640431 |   |   | P |          |
| 8.884265 | 8.095957 | 9.068779 | 9.407208 | P | P | P | 8.438191 |
| 5.981386 | 5.480785 | 4.728077 | A        | P | P |   | 5.555918 |
| 7.530362 | 6.574942 | 7.292687 | 7.506896 | P | A | A | 5.848151 |
| 7.95888  | 6.27487  | 6.988797 | 8.482889 | P | A | P | 6.506535 |
| 8.090339 | 6.46599  | 7.79222  | 8.080254 | P | P | P | 5.630025 |
| 8.419094 | 7.772646 | 8.521072 | 9.275885 | P | P | P | 8.062934 |
| 10.81821 | 10.10116 | 9.657537 | 10.07587 | P | P | P | 10.6353  |
| 8.132742 | 6.643009 | 8.450155 | 8.998193 | P | A | A | 5.059784 |
| 6.616077 | 6.00423  | 5.644523 | 5.169386 | P | P | P | 6.147658 |
| 9.832833 | 9.691155 | 9.440489 | 8.781134 | P | P | P | 9.801595 |
| 6.13574  | 6.38434  | 5.629211 | 5.295743 | P | P | P | 5.295653 |
| 7.528979 | 6.880386 | 7.682447 | 8.559898 | P | P | P | 8.223095 |
| 7.571261 | 8.478136 | 8.678609 | 8.166554 | P | P | P | 8.071795 |
| 9.449013 | 9.269117 | 10.57534 | 9.991172 | P | P | P | 8.351687 |
| 6.594177 |          | 6.072004 | A        |   | P |   |          |
| 8.37668  | 6.340991 | 5.705839 | 5.376461 | P | P | P |          |
| 8.090833 | 7.021306 | 6.597532 | 6.539872 | P | P | P | 1.03781  |
| 11.74372 | 10.68612 | 9.560735 | 10.97569 | P | P | P | 11.52699 |
|          | 5.999424 |          |          | A |   |   |          |
| 8.125271 | 6.936591 | 8.087129 | 8.989718 | A | A | A | 7.037382 |
| 10.01114 | 10.43729 | 11.15548 | 11.48486 | P | P | P | 10.34423 |
| 7.756435 | 7.361197 | 8.246055 | 9.511369 | P | P | P | 7.752367 |
|          |          |          | 8.938434 |   |   | A |          |
| 9.772247 | 8.551149 | 9.884872 | 9.443244 | P | P | P | 9.567216 |



|          |          |          |          |   |   |   |          |
|----------|----------|----------|----------|---|---|---|----------|
| 9.149581 | 7.730224 | 9.331927 | 9.573858 | P | P | P | 7.769344 |
| 8.203716 | 8.017983 | 8.559092 | 8.473113 | P | P | P | 7.566832 |
| 6.249629 | 6.460559 | 6.063707 | 7.081392 | A | M | A | 5.169845 |
| 9.327564 | 8.209679 | 10.18414 | 10.85414 | P | P | P | 8.39172  |
| 6.274778 | 4.764128 | 6.886758 | 7.192489 | P | A | M | 6.109728 |
| 6.993893 | 7.219666 | 5.572312 | 4.651024 | P | P | P | 7.20357  |
| 6.233204 | 7.193426 | 6.395332 | 4.047776 | A | M | P | 6.15688  |
| 7.086343 | 6.883316 | 7.982929 | 8.406349 | A | P | P | 6.454418 |
| 7.590002 | 6.916123 | 7.265519 | 6.45788  | P | P | P | 7.239435 |
| 5.925948 | 4.766764 | 6.972986 | 7.944673 | A | P | P | 6.087296 |
| 7.315931 | 4.802887 | 7.362452 | 8.050351 | P | P | P | 6.851664 |
| 6.076582 |          | 5.822474 | A        |   | A |   | 2.917368 |
| 8.946508 | 10.13753 | 9.510214 | 8.813646 | P | P | P | 9.375487 |
| 5.112701 | 4.806307 | 1.040052 | 5.85955  | P | P | P | 6.224446 |
|          |          | 4.124352 | 6.310636 |   | M | A |          |
| 7.220972 | 6.281725 | 6.909481 | 7.743488 | P | P | A | 6.543358 |
| 8.361678 | 7.931181 | 8.780939 | 8.929953 | P | M | A | 8.100757 |
| 6.158627 | 5.499335 | 7.121076 | 5.019119 | P | P | P | 6.567405 |
| 4.891322 | 6.124452 | 4.912622 | M        | P | P |   | 6.315314 |
| 9.949653 | 10.45283 | 10.83722 | 11.77008 | P | P | P | 10.81789 |
| 11.16888 | 10.26514 | 11.5763  | 12.16407 | P | P | P | 10.86867 |
| 14.51844 | 13.79083 | 14.66882 | 13.99908 | P | P | P | 13.15216 |
| 6.816362 | 5.397913 | 7.16688  | 6.864108 | P | A | M | 6.476446 |
| 7.013307 |          | 7.398448 | 7.19356  | A | A | A | 5.981751 |
| 8.11915  | 7.351144 | 8.310452 | 8.574815 | A | P | A | 7.642064 |
| 6.746868 |          | 7.155915 | 8.11291  | P | A | A | 7.190758 |
| 5.858718 |          | 6.071426 | 6.560911 | P | A | P | 5.164067 |
| 7.620916 | 7.226274 | 6.854708 | A        | P | P |   | 6.608004 |
| 9.647099 | 9.374885 | 10.55727 | 10.4702  | P | P | P | 8.96688  |
| 6.889204 | 4.213673 | 6.397831 | A        | P | A |   | 5.540405 |
| 12.51652 | 12.20882 | 11.38476 | 11.34664 | P | P | P | 12.43406 |
| 8.698037 | 8.518419 | 7.219793 | 7.750583 | P | P | P | 9.363074 |
| 7.537002 | 8.060748 | 6.893488 | 8.063405 | P | P | P | 8.862643 |
| 5.699361 | 6.092264 | 5.788034 | 5.779637 | P | P | P | 7.607286 |
| 9.026691 | 9.667067 | 7.63534  | 7.736895 | P | P | P | 10.94903 |
| 8.623023 | 8.772583 | 7.970897 | 7.984779 | P | P | P | 8.619584 |
| 5.842121 | 2.870788 | 5.496707 | 6.360651 | A | P | P | 5.722886 |
| 5.652535 | 4.8834   | 4.411731 | 5.630566 | P | M | P | 6.119851 |
| 6.098099 | 6.686322 | 5.948011 | P        | P | M |   | 6.550263 |
| 8.540732 | 8.662724 | 8.525478 | 8.03229  | P | P | P | 8.59244  |

|          |          |          |            |   |   |   |          |
|----------|----------|----------|------------|---|---|---|----------|
| 9.460407 | 9.137981 | 10.43741 | 9.925746 P | P | P | P | 9.124195 |
|          |          |          | 6.244452   |   |   | A |          |
|          |          |          | 7.558583   |   |   | A |          |
| 6.606003 | 5.398741 | 5.565405 | M          | A | P |   | 5.457591 |
| 6.227413 |          | 6.444224 | 5.790799 A |   | P | P | 4.200598 |
| 6.686534 | 7.863066 | 6.934205 | 7.371919 P | P | P | P | 7.775491 |
| 8.474187 | 8.093154 | 8.912663 | 9.218852 P | P | P | P | 8.330784 |
| 7.396947 | 6.413925 | 8.374804 | 8.45158 P  | P | P | P | 7.306189 |
| 6.973564 | 6.37278  | 5.537439 | 7.122623 P | P | P | P | 6.660758 |
| 7.100001 | 5.033972 | 4.763007 | 6.745182 P | P | P | P | 6.67408  |
| 6.053714 |          | 5.259124 | 4.677149 P |   | P | P | 5.659384 |
| 6.574799 | 6.352544 | 6.890356 | 7.117108 A | P | P | A | 5.890642 |
| 8.361245 | 8.370831 | 8.762384 | 8.833883 P | P | P | P | 8.38912  |
| 10.96503 | 10.1872  | 10.34862 | 10.53115 P | P | P | P | 9.675797 |
| 8.35673  | 7.035195 | 8.204971 | 8.391049 P | P | P | P | 8.074432 |
| 10.13272 | 10.28606 | 9.822376 | 9.468472 P | P | P | P | 10.14461 |
| 5.651374 |          |          | M          |   |   |   | 6.91072  |
| 5.256015 | 5.719774 | 5.932461 | 7.190062 P | P | P | P | 6.855466 |
| 7.185614 | 6.260855 | 7.62892  | 9.461724 P | P | P | P | 7.781008 |
| 6.703386 | 7.658466 | 6.871777 | 6.647544 P | A | P | P | 6.941656 |
| 9.716691 | 10.01852 | 9.848134 | 9.109195 P | P | P | P | 10.01099 |
| 11.46749 | 10.47329 | 11.91995 | 11.86059 P | P | P | P | 10.1651  |
| 6.821675 | 6.518387 |          | 6.686936 A | A |   | P | 6.31707  |
|          | 4.754577 |          |            | A |   |   |          |
| 6.440381 | 6.887237 | 6.459977 | 7.809174 P | P | P | P | 7.274897 |
| 6.568165 | 6.391367 | 6.879694 | 7.43119 P  | P | P | M | 6.960331 |
| 12.48822 | 12.41138 | 10.94619 | 11.82722 P | P | P | P | 12.8598  |
| 8.374821 | 8.891598 | 6.208585 | 6.805836 P | P | P | P | 8.421384 |
| 9.929752 | 9.617951 | 9.731447 | 9.457989 P | P | P | P | 9.07941  |
|          |          |          | 4.064652   |   |   | P |          |
| 7.019069 | 6.507698 | 5.789958 | 7.057736 P | P | P | P | 6.448939 |
| 6.946723 | 6.871162 | 6.898511 | 6.441216 M | A | P | P | 6.293653 |
| 8.766308 | 7.78173  | 9.21102  | 9.368691 P | P | P | P | 8.668685 |
| 9.009763 | 9.227355 | 9.600019 | 9.700359 P | P | P | P | 8.534156 |
| 6.558366 | 5.305302 | 7.248305 | 7.072331 A | P | A | A | 5.555519 |
| 5.41025  | 5.916174 | 4.730305 | 5.768682 A | A | P | P | 6.3589   |
| 8.095388 | 6.887295 | 6.993189 | 7.10805 P  | P | P | P | 7.30198  |
|          |          |          | 6.803103   |   |   | A |          |
|          |          | 1.947964 |            |   | M |   |          |
| 7.036233 | 6.8135   | 6.751545 | 7.932839 P | A | P | P | 6.607688 |

|          |          |          |          |   |   |   |          |
|----------|----------|----------|----------|---|---|---|----------|
| 9.121662 | 8.839981 | 10.23991 | 9.987662 | P | P | P | 8.232636 |
| 4.302645 |          |          | A        |   |   |   | 1.514023 |
| 6.976066 | 6.488707 | 7.289577 | M        | M | P |   | 6.861785 |
| 10.69195 | 11.25012 | 11.97548 | 12.18377 | P | P | P | 11.40329 |
| 9.521235 | 10.21826 | 9.477169 | 8.924929 | P | P | P | 9.508369 |
| 8.266925 | 8.053099 | 7.211387 | 7.117589 | P | P | P | 8.382942 |
| 9.783069 | 9.847035 | 9.123443 | 8.317872 | P | P | P | 9.877801 |
| 10.44533 | 10.32538 | 8.847891 | 8.983654 | P | P | P | 10.55957 |
| 6.76613  | 6.996631 | 7.710754 | 7.605254 | P | P | M | 7.081391 |
| 5.729986 |          |          | A        |   |   |   | 4.64061  |
| 10.41165 | 11.01258 | 11.51801 | 11.63846 | P | P | P | 11.06487 |
| 4.541201 |          |          | A        |   |   |   | 2.366156 |
| 7.821005 | 7.230492 | 7.926333 | 9.145679 | P | P | M | 7.657281 |
| 12.833   | 12.61037 | 11.41988 | 11.3922  | P | P | P | 12.61512 |
| 6.19319  | 5.879483 | 7.064424 | 5.946477 | P | A | P | 6.3233   |
| 8.160428 | 8.082962 | 7.79591  | 7.00398  | P | P | P | 7.388373 |
|          | 5.829422 | 5.432256 | 2.128186 | M | A | P |          |
| 6.348734 | 5.710924 | 6.404054 | 7.111856 | P | P | A | 6.489525 |
| 10.36876 | 10.90085 | 10.37559 | 9.118142 | P | P | P | 10.10902 |
| 7.912167 | 7.299977 | 7.075832 | 6.336453 | P | P | P | 7.963601 |
| 2.048472 |          |          | P        |   |   |   | 5.047162 |
| 5.981189 | 5.842564 | 6.46904  | 8.18295  | P | P | P | 7.892012 |
| 6.281911 | 6.690768 | 6.912021 | 7.855622 | P | P | P | 7.707781 |
| 8.154573 | 8.409574 | 7.759525 | 8.296084 | P | P | P | 8.063206 |
| 5.945572 | 6.179339 | 7.186519 | 7.900839 | P | P | M | 6.585217 |
| 6.538258 | 6.857741 | 5.870261 | 5.616544 | P | P | P | 6.802499 |
| 8.99388  | 8.919734 | 9.617816 | 9.677802 | P | P | P | 8.414844 |
| 10.07392 | 10.73262 | 9.675499 | 9.442535 | P | P | P | 10.44256 |
| 11.80645 | 12.66026 | 12.73743 | 12.27785 | P | P | P | 12.83774 |
| 8.868551 | 8.895188 | 9.975654 | 9.308882 | P | P | P | 8.758063 |
| 8.526512 | 7.516416 | 3.298053 | 5.318708 | P | P | P | 8.143684 |
| 10.97894 | 11.19155 | 10.52222 | 8.988907 | P | P | P | 10.87685 |
| 13.78323 | 13.81086 | 13.38027 | 12.55738 | P | P | P | 13.86264 |
|          | 4.175037 |          |          | P |   |   |          |
| 9.295378 | 8.053552 | 8.401022 | 7.822308 | P | P | P | 8.219712 |
|          | 4.976732 | 6.041423 | 4.939924 | P | M | P |          |
| 8.918082 | 8.315061 | 7.550657 | 7.407221 | P | P | P | 7.936631 |
|          | 4.854811 | 6.934467 |          | M | A |   |          |
| 7.472012 | 7.103635 | 7.602093 | 7.732332 | P | A | P | 6.627138 |
| 9.719158 | 8.767887 | 9.397632 | 10.23391 | P | P | P | 9.420545 |

|          |          |          |            |   |   |   |          |
|----------|----------|----------|------------|---|---|---|----------|
| 6.82825  | 6.186446 | 6.820698 | A          | P | A |   | 4.946106 |
| 8.508949 | 7.31995  | 6.546904 | 7.762307 P | P | P | P | 7.651881 |
| 5.157125 | 4.938192 | 5.570974 | A          | P | P |   | 2.899038 |
| 9.550512 | 9.27212  | 10.22199 | 10.29501 P | P | P | P | 8.951504 |
| 6.193791 | 5.317045 | 6.332122 | 6.492174 A | P | A | A | 5.035674 |
| 8.156929 | 8.205075 | 7.336679 | 7.62534 P  | P | P | P | 7.650143 |
| 10.57319 | 10.22006 | 9.404441 | 9.382604 P | P | P | P | 10.09645 |
| 9.539136 | 9.383481 | 9.865198 | 10.01851 P | P | P | P | 9.385057 |
| 5.469609 | 5.263966 |          | A          | P |   |   | 3.849822 |
|          |          | 5.084003 | 3.83446    |   | M | P |          |
| 10.69362 | 10.64765 | 10.05402 | 9.729245 P | P | P | P | 10.57513 |
|          | 5.048618 | 5.386424 | 6.096686   | A | P | P |          |
|          | 4.870943 | 4.751654 |            | A | A |   |          |
| 10.65259 | 11.69773 | 12.2958  | 12.09568 P | P | P | P | 11.63467 |
| 11.44898 | 11.39012 | 11.96495 | 12.57252 P | P | P | P | 11.37524 |
| 7.097106 | 5.69337  | 7.323175 | P          | P | A |   | 6.604256 |
| 8.780524 | 8.766027 | 9.490376 | 9.852469 P | P | P | P | 8.655592 |
| 4.862117 |          |          | P          |   |   |   | 6.146947 |
| 9.127024 | 8.767592 | 10.00427 | 9.079284 P | P | P | P | 7.748783 |
| 6.876617 | 6.981832 | 7.436559 | 8.261353 P | P | P | P | 7.273637 |
| 8.661469 | 8.092922 | 8.159731 | 9.959456 P | P | P | P | 8.704318 |
| 6.664631 | 6.091249 | 6.3266   | 2.825193 P | P | P | P | 5.827026 |
| 12.51907 | 11.41074 | 12.3448  | 12.51669 P | P | P | P | 10.92349 |
| 6.215176 | 6.086248 | 5.666552 | 4.874054 P | P | P | P | 6.081407 |
| 12.01423 | 12.18842 | 12.87974 | 14.28544 P | P | P | P | 12.59491 |
| 6.418113 | 6.843169 | 5.76428  | 6.345015 M | P | M | P | 7.829532 |
| 8.712265 | 8.762219 | 8.863409 | 9.606602 A | P | P | P | 8.841826 |
| 9.877311 | 10.5287  | 10.85154 | 11.46208 P | P | P | P | 10.52365 |
| 7.651856 | 7.846138 | 6.455487 | 5.749539 P | P | P | P | 7.270053 |
| 6.709602 | 6.011074 | 6.606996 | 7.348214 A | A | P | P | 5.236653 |
| 8.11722  | 8.712732 | 7.510955 | 7.715698 P | P | P | P | 8.477186 |
| 9.812984 | 10.58276 | 10.76221 | 9.702823 P | P | P | P | 10.58186 |
| 7.381895 | 5.930477 | 5.458929 | 6.047154 P | P | P | P | 5.681039 |
| 10.16034 | 10.28304 | 10.50445 | 11.58368 P | P | P | P | 10.25299 |
| 6.699047 |          | 7.922801 | 8.677181 P |   | A | A | 8.025653 |
| 7.7021   | 7.943874 | 7.551816 | 7.199928 P | P | P | P | 7.772404 |
| 11.90455 | 11.78909 | 10.65768 | 11.28517 P | P | P | P | 11.97493 |
| 8.662799 | 7.921178 | 8.412601 | 7.236488 P | P | P | P | 7.639548 |
| 6.984759 | 6.549611 | 6.48427  | 7.26123 M  | A | P | A | 6.231805 |
| 9.777893 | 9.649126 | 9.16512  | 8.940195 P | P | P | P | 9.738411 |

|          |          |          |          |   |   |   |          |
|----------|----------|----------|----------|---|---|---|----------|
| 8.695779 | 7.919593 | 9.080308 | 8.987463 | P | P | A | 8.061647 |
|          | 4.595207 |          |          | P |   |   |          |
| 5.891733 | 5.977347 |          | A        | P |   |   | 3.230473 |
| 8.074298 | 8.389643 | 8.759541 | 9.334391 | A | P | P | 7.755395 |
| 9.325038 | 10.18967 | 9.332314 | 9.339325 | P | P | P | 9.839929 |
|          | 5.54674  | 5.702691 | 4.15443  | P | P | P |          |
| 7.909849 | 6.612321 | 6.372385 | 6.520537 | P | P | P | 7.1933   |
| 10.51949 | 10.4866  | 11.70298 | 10.16927 | P | P | P | 8.6724   |
| 7.660413 | 7.623244 | 6.841375 | 6.861455 | P | P | P | 7.522212 |
|          | 7.04879  | 6.977706 |          | P | P |   |          |
| 5.573718 | 4.130287 | 3.027039 | 6.850588 | A | P | A | 5.498569 |
|          |          | 7.741566 | 7.169392 |   | A | A |          |
|          |          |          | 1.761544 |   |   | P |          |
| 7.680778 | 7.95953  | 8.247373 | 8.067434 | P | P | P | 7.641021 |
| 7.494876 | 7.48864  | 6.687593 | 6.550003 | P | P | M | 7.578784 |
| 4.883572 | 5.362058 | 4.693761 | 0.998329 | P | A | P | 6.628884 |
| 11.70689 | 10.14676 | 11.82733 | 12.00949 | P | P | P | 10.03161 |
|          |          |          | 6.550366 |   |   | A |          |
|          |          | 5.522286 | 4.995091 |   | P | P |          |
| 8.551845 | 8.163781 | 9.68062  | 9.364535 | M | P | A | 8.027222 |
| 7.171652 | 6.95241  |          | 7.984799 | P | A | P | 6.580697 |
| 10.4296  | 10.49433 | 10.21878 | 9.85397  | P | P | P | 10.67781 |
| 6.313389 | 6.34219  | 5.912403 | 6.299324 | P | M | P | 6.198157 |
| 6.568834 | 6.354911 |          | P        | A |   |   | 7.103903 |
| 4.897277 | 5.047008 |          | 2.821724 | P |   | P | 6.180429 |
| 9.076047 | 10.14331 | 9.334334 | P        | P | P |   | 9.252654 |
| 7.000905 | 5.620381 | 5.553929 | P        | P | P |   | 6.727378 |
| 5.038096 | 5.287437 | 6.410339 | P        | M | P |   | 6.57381  |
| 10.47042 | 11.39828 | 9.634893 | 9.567746 | P | P | P | 11.08961 |
| 5.999422 | 6.003555 | 6.911938 | 5.933783 | P | P | A | 6.56688  |
| 7.063088 | 7.693001 | 7.045432 | 8.943762 | P | P | A | 8.689806 |
| 6.380159 | 4.940166 |          | A        | P |   |   | 5.957856 |
| 8.497741 | 7.211863 | 6.729868 | 6.644194 | P | P | P | 7.724966 |
| 8.735072 | 8.55833  | 7.564515 | 7.484933 | P | P | P | 8.834339 |
| 11.91143 | 11.59829 | 11.6922  | 11.08533 | P | P | P | 11.84851 |
| 7.93748  | 6.658654 | 8.103669 | 8.43002  | P | P | P | 6.942271 |
| 7.844398 | 7.754463 | 8.649569 | 8.675795 | P | P | A | 6.897707 |
| 7.334252 | 5.223108 | 5.977517 | A        | P | P |   | 6.372948 |
| 6.74432  | 6.130816 | 3.645992 | 6.492657 | A | P | A | 6.536268 |
| 7.232183 | 8.086113 | 6.690464 | P        | P | P |   | 7.126609 |

|          |          |          |          |   |   |   |   |          |
|----------|----------|----------|----------|---|---|---|---|----------|
| 5.973868 | 5.900331 |          | 2.369188 | P | A |   | P | 6.209354 |
| 11.54835 | 11.94701 | 12.42515 | 13.24748 | P | P |   | P | 12.2285  |
| 7.843987 | 7.928567 | 7.359351 |          | A | P | P |   | 7.848158 |
| 7.011233 | 7.092314 | 6.811233 | 6.852255 | P | P |   | P | 7.28384  |
| 7.193302 | 6.797865 | 6.903799 | 7.814846 | P | P |   | P | 7.499238 |
| 10.51394 | 9.657019 | 10.57064 | 10.63263 | P | P |   | P | 9.146782 |
| 10.70636 | 11.02371 | 10.20359 | 10.0518  | P | P |   | P | 10.76716 |
| 7.851939 | 7.875517 | 7.597087 | 6.800568 | P | P |   | P | 7.85827  |
| 8.810234 | 8.858954 | 9.961733 | 9.458633 | P | P |   | P | 9.054665 |
| 7.744551 |          | 8.275108 | 7.736823 | P |   | A | A | 6.562348 |
| 6.698302 | 6.51395  | 7.411856 | 6.749067 | P | P |   | P | 6.364757 |
|          | 1.143412 |          |          |   | M |   |   |          |
| 8.571404 | 7.71947  | 8.543265 | 8.581683 | P | A | A | P | 7.776652 |
| 6.015016 |          |          |          | A |   |   |   | 0.85537  |
| 9.514289 | 9.923266 | 9.991554 | 10.62213 | P | P |   | P | 10.07375 |
| 8.676287 | 8.550262 | 7.125754 | 7.705338 | P | P |   | P | 8.625394 |
| 7.619559 | 8.087068 | 8.77564  | 9.034893 | P | P |   | P | 7.710887 |
| 8.642564 | 8.108248 | 7.238259 | 8.335169 | P | P |   | P | 8.892506 |
| 10.21443 | 10.31985 | 9.598045 | 8.931083 | P | P |   | P | 10.24253 |
| 4.73948  | 2.777395 |          |          | P | M |   |   | 5.640492 |
| 10.55591 | 10.28001 | 9.752352 | 9.874832 | P | P |   | P | 11.10454 |
| 5.418372 | 5.167295 | 5.359204 |          | A | P | A |   | 5.146881 |
|          |          | 6.943728 |          |   |   | P |   |          |
|          | 6.40051  |          | 6.441939 |   | P |   | M |          |
|          |          |          | 6.836366 |   |   |   | A |          |
| 10.43583 | 11.88625 | 10.95591 | 8.918056 | P | P |   | P | 12.01522 |
| 10.19699 | 10.22367 | 10.7283  | 11.4155  | P | P |   | P | 10.55406 |
| 7.417923 | 6.899538 | 6.901145 | 5.600668 | A | P | P | P | 6.194433 |
| 9.7152   | 10.20103 | 9.740273 | 8.048286 | P | P |   | P | 9.957741 |
| 10.72364 | 10.14215 | 9.120203 | 9.700074 | P | P |   | P | 10.16737 |
| 4.649797 | 5.943713 |          |          | P | P |   |   | 6.497258 |
| 7.731404 | 7.028039 | 7.733504 | 7.242279 | P | P |   | M | 7.20877  |
| 10.79042 | 10.04726 | 9.483662 | 9.529474 | P | P |   | P | 9.686791 |
| 12.28737 | 12.31878 | 10.52263 | 9.78618  | P | P |   | P | 12.59685 |
| 7.143903 | 6.146453 | 6.982343 | 3.199671 | P | P |   | P | 6.957711 |
| 6.256991 | 5.115058 | 6.464126 |          | P | A | P |   | 6.667505 |
| 5.064548 |          |          | 6.981971 | A |   |   | A | 6.009022 |
| 6.96835  | 6.121891 | 5.742917 | 7.738893 | P | P |   | P | 6.671436 |
| 8.158687 | 7.855387 | 7.367944 | 8.701495 | P | P |   | P | 7.630899 |
| 9.018104 | 9.568329 | 8.889639 | 8.091496 | P | P |   | P | 9.349992 |

|          |          |          |          |   |   |   |   |          |
|----------|----------|----------|----------|---|---|---|---|----------|
| 5.129128 | 5.188546 |          | 6.782582 | P | A |   | A | 5.78566  |
| 8.254512 | 8.259608 | 7.785377 | 7.765096 | P |   | P | P | 7.952532 |
| 9.025458 | 8.249424 | 7.929851 | 7.94265  | P |   | P | P | 8.358228 |
| 5.840369 | 5.579845 |          |          | P | A |   |   | 5.80895  |
| 9.720879 | 9.669118 | 9.974618 | 10.48    | P |   | P | P | 9.832714 |
| 6.673335 | 7.586949 | 7.129046 | 4.77945  | P | M |   | P | 6.869466 |
| 7.284254 | 7.041807 | 7.229171 | 7.448423 | P |   | P | P | 7.225353 |
| 7.987981 | 8.356935 | 9.041886 | 9.007811 | P |   | P | P | 7.542692 |
| 10.12455 | 10.55942 | 10.69814 | 11.62422 | P |   | P | P | 10.63341 |
| 9.887911 | 9.423602 | 11.2476  | 11.02469 | P |   | P | P | 9.791407 |
| 11.81416 | 12.26497 | 11.43185 | 11.12944 | P |   | P | P | 12.27393 |
| 12.17804 | 11.91657 | 11.23391 | 10.67142 | P |   | P | P | 11.83159 |
| 9.801403 | 10.49853 | 9.801434 | 8.942771 | P |   | P | P | 10.31607 |
| 9.000318 | 6.672181 |          | 8.192957 | A | P |   | P | 5.516972 |
| 7.097842 | 6.678739 | 4.263094 | 4.296716 | P |   | P | P | 7.357328 |
| 11.31851 | 10.9265  | 11.92633 | 12.99555 | P |   | P | P | 11.31935 |
|          |          |          | 3.414778 |   |   |   | P |          |
| 7.105687 |          | 7.445796 |          | A |   | A |   | 6.401503 |
| 5.81277  | 5.848095 | 4.540421 | 6.943446 | M | P | P | A | 6.057382 |
| 8.699986 | 9.003211 | 8.433866 | 8.220655 | P |   | P | P | 8.444482 |
| 10.56593 | 10.6961  | 9.807086 | 9.315002 | P |   | P | P | 10.41902 |
| 10.70723 | 10.27897 | 9.416476 | 9.518015 | P |   | P | P | 10.68394 |
| 4.993986 |          |          | 5.693888 | A |   |   | A | 2.484096 |
| 7.367655 | 6.40764  | 7.427632 | 7.786048 | P |   | P | P | 6.469454 |
| 7.485413 | 7.086117 | 8.396197 | 8.530582 | P |   | P | P | 6.858244 |
| 9.598956 | 8.868694 | 9.997152 | 10.22451 | A | P | P | A | 8.886568 |
| 8.72928  | 8.077066 | 8.768356 | 9.714762 | P |   | P | P | 8.566833 |
| 8.028295 | 7.057648 | 7.595032 | 8.235915 | P |   | P | P | 8.076409 |
| 10.00313 | 9.15471  | 9.272542 | 8.782319 | P |   | P | P | 8.907434 |
| 7.536015 | 7.552875 | 7.843104 | 7.713742 | A | P | P | P | 6.736496 |
| 7.694741 | 9.1918   | 8.803309 | 7.789908 | P |   | P | P | 8.714087 |
| 5.6909   | 5.297907 | 4.822704 |          | P |   | P |   | 5.999878 |
| 11.70308 | 11.5734  | 11.59058 | 10.14968 | P |   | P | P | 12.01224 |
| 7.515907 | 6.791617 | 8.160345 | 7.067416 | P |   | P | P | 7.255052 |
| 10.54737 | 9.227331 | 9.456927 | 9.120767 | P |   | P | P | 10.12088 |
| 7.118201 | 5.687946 | 5.674714 |          | A | P | P |   | 5.562881 |
| 6.396246 | 7.919675 | 6.86875  | 6.49611  | P |   | P | P | 6.375702 |
| 4.342032 |          |          |          | P |   |   |   | 5.697207 |
| 5.891    | 6.009844 |          | 5.497346 | P |   |   | P | 6.185587 |
| 9.165376 | 8.564607 | 9.533094 | 9.488637 | P |   | P | P | 8.394454 |

|          |          |          |          |   |   |   |   |          |
|----------|----------|----------|----------|---|---|---|---|----------|
| 7.454879 | 7.650864 | 7.106835 | 5.595783 | P | M | P | P | 7.349846 |
| 4.469949 |          |          |          | P |   |   |   | 5.522484 |
| 10.35656 | 10.08184 | 10.26316 | 10.77948 | P | P | P | P | 10.07667 |
|          |          | 7.221514 |          |   |   | M |   |          |
| 4.119129 |          |          |          | P |   |   |   | 5.907228 |
| 8.12381  | 7.065554 | 7.505281 | 7.693601 | P | A | P | A | 7.096306 |
| 11.95264 | 12.01414 | 10.72779 | 10.82663 | P | P | P | P | 12.09429 |
| 10.74399 | 10.56228 | 10.37552 | 9.486131 | P | P | P | P | 10.51795 |
| 6.214273 | 6.670791 | 6.096314 | 2.543044 | P | P | P | P | 6.18926  |
| 8.423739 | 7.528478 | 7.575567 | 7.7644   | P | P | P | P | 6.911628 |
| 8.834833 |          |          | 6.610907 | P |   |   | P | 8.636279 |
| 12.19236 | 12.05698 | 11.33087 | 10.71844 | P | P | P | P | 11.89612 |
|          | 5.761491 | 6.947206 |          | A | A |   |   |          |
| 5.493604 | 5.215141 | 0.738247 | 5.838127 | P | M | M | M | 5.845439 |
| 10.45642 | 10.26685 | 9.538695 | 8.917414 | P | P | P | P | 10.44458 |
| 4.708684 |          | 6.42155  |          | P |   | P |   | 6.358177 |
| 9.502017 | 9.605913 | 10.32139 | 11.62303 | P | P | P | P | 10.16018 |
| 6.155648 | 4.330082 | 2.788306 | 6.503349 | A | P | P | A | 6.299057 |
|          |          | 3.84448  |          |   |   | P |   |          |
| 7.530886 | 7.656267 | 7.455181 | 6.457831 | P | P | P | P | 6.948239 |
|          |          | 5.438651 |          |   |   | P |   |          |
| 6.625798 | 6.214763 | 6.337714 | 6.740879 | A | P | P | P | 5.834479 |
| 9.88065  | 9.433062 | 9.158983 | 8.754618 | P | P | P | P | 9.397182 |
| 10.08133 | 10.07162 | 9.745717 | 8.70342  | P | P | P | P | 9.871178 |
| 9.53575  | 9.264084 | 8.684445 | 8.320964 | P | P | P | P | 8.967311 |
| 6.210448 | 5.60283  | 4.840652 |          | A | A | P |   | 5.523325 |
| 6.327228 | 5.959851 | 6.51831  | 6.777074 | P | P | P | P | 6.375785 |
| 9.100725 | 9.024718 | 7.994977 | 7.773493 | P | P | P | P | 7.860175 |
| 7.626808 | 8.121026 | 7.603322 | 7.772413 | P | P | P | M | 7.879889 |
| 9.240335 | 8.97639  | 8.115155 | 7.916594 | P | P | P | P | 8.585871 |
| 7.645096 | 7.590225 | 8.636096 | 8.004404 | P | P | P | P | 8.325579 |
| 9.258302 | 9.735766 | 11.19198 | 10.54891 | P | P | P | P | 8.701053 |
| 9.135029 | 9.370323 | 7.653172 | 8.019819 | P | P | P | P | 8.76748  |
| 11.53153 | 11.75615 | 12.04902 | 13.67436 | P | P | P | P | 12.79416 |
| 11.10852 | 9.821805 | 10.66962 | 11.46735 | P | P | P | P | 10.12776 |
| 9.332628 | 9.208751 | 7.913736 | 8.900636 | P | P | P | P | 9.135087 |
|          |          | 3.113491 |          |   |   | M |   |          |
| 8.96835  | 7.628638 | 7.136416 | 8.198144 | P | P | P | P | 8.307939 |
| 9.177814 | 9.56415  | 10.54964 | 10.88085 | P | P | P | P | 9.897246 |
|          |          |          | 5.849752 |   |   |   | A |          |



|          |          |          |          |   |   |   |          |
|----------|----------|----------|----------|---|---|---|----------|
| 10.10704 | 10.37662 | 9.808999 | 9.369209 | P | P | P | 10.50961 |
| 9.323524 | 9.541092 | 7.68015  | 8.187663 | P | P | P | 9.839657 |
| 4.504325 | 5.674179 | 4.689235 | P        | A | A |   | 5.34479  |
| 7.951532 | 8.439013 | 8.190063 | 6.582219 | P | P | P | 8.323327 |
| 7.222546 | 8.287742 | 9.27094  | 10.05282 | P | P | P | 8.428477 |
| 9.62517  | 9.735978 | 10.48562 | 10.58572 | P | P | P | 10.5138  |
| 9.311542 | 7.985792 | 7.05731  | 7.879261 | P | P | P | 7.565259 |
| 10.1114  | 9.030614 | 8.184656 | P        | P | P |   | 9.38768  |
| 7.906241 | 7.395937 | 7.322147 | 8.248185 | P | P | P | 7.723    |
| 9.422369 | 9.23883  | 7.187268 | 8.861765 | P | P | P | 9.837351 |
| 6.340421 | 6.381728 | 5.581615 | A        | A | P |   | 6.566618 |
| 10.59646 | 10.31935 | 10.1044  | 9.875439 | P | P | P | 10.25766 |
| 6.362268 | 5.151765 | 1.637668 | 6.401554 | P | P | P | 5.984809 |
| 8.17411  | 6.897434 | 9.039166 | 10.26337 | P | A | A | 8.037245 |
| 10.27631 | 9.568704 | 10.64436 | 10.56576 | P | P | P | 10.11337 |
| 7.247036 | 7.143003 | 6.097701 | 6.141586 | P | P | P | 6.59508  |
| 9.331993 | 9.69616  | 9.875331 | 10.26969 | P | P | P | 9.877995 |
| 6.322208 |          | 6.017107 | 6.212074 |   | P | A | 5.357498 |
| 6.803793 | 6.827025 | 6.074951 | 6.744452 | P | P | P | 6.585444 |
|          |          |          | 7.000341 |   |   | A |          |
| 4.871693 |          | 7.112659 | 5.838059 |   | A | P | 5.162713 |
| 10.07747 | 10.84979 | 10.83953 | 11.489   | P | P | P | 10.92855 |
| 10.62648 | 10.808   | 12.30984 | 11.99019 | P | P | P | 9.986378 |
| 9.596812 | 9.141686 | 9.900731 | 10.25751 | P | P | P | 9.291486 |
| 7.30239  | 7.295898 | 7.234375 | 7.774455 | M | P | P | 8.077405 |
| 6.565674 | 7.091035 | 7.620636 | 7.646459 | A | P | P | 6.350462 |
| 7.081981 | 5.89156  | 6.376855 | 6.098706 | P | A | P | 5.682061 |
| 8.342241 | 8.349322 | 8.217885 | 7.62309  | P | P | P | 7.406378 |
| 10.75624 | 10.26161 | 9.194405 | 9.211138 | P | P | P | 9.767553 |
| 9.019112 | 9.577409 | 8.4353   | 7.198849 | P | P | P | 9.063271 |
| 7.143766 | 5.496686 | 7.20803  | 5.829096 | P | P | P | 7.170068 |
| 7.320248 | 5.78489  | 7.674666 | 7.559323 | A | A | A | 6.673036 |
| 6.246639 | 5.401582 | 5.852032 | 6.451592 | P | M | P | 3.020411 |
| 6.986396 | 6.580329 | 6.958799 | 6.248832 | P | P | P | 6.527635 |
| 8.123574 | 9.290318 | 9.55649  | 9.581592 | P | P | P | 10.17113 |
| 6.262069 | 6.023517 | 6.402748 | 7.523946 | P | P | P | 7.558874 |
| 5.961907 | 4.153503 | 5.82113  | 6.47715  | P | M | P | 2.544922 |
| 6.895294 | 7.537845 | 6.019089 | 7.10844  | P | P | P | 7.585522 |
| 7.53713  | 8.120502 | 7.282396 | 6.168696 | P | P | P | 7.40182  |
| 8.373525 | 8.363424 | 6.754251 | 6.130824 | P | P | P | 8.251668 |

|          |          |          |          |   |   |   |          |
|----------|----------|----------|----------|---|---|---|----------|
| 8.980245 | 8.841066 | 7.42903  | 8.152701 | P | P | P | 8.326067 |
| 9.558477 | 9.603815 | 9.285961 | 9.432081 | P | P | P | 9.779775 |
| 9.548114 | 9.472249 | 8.510304 | 8.731344 | P | P | P | 9.178573 |
|          |          |          |          | P |   |   |          |
| 6.755255 | 5.136737 | 6.077863 | 3.664446 | P | P | P | 6.252234 |
| 6.014304 |          |          | 6.908542 |   |   | A | 4.717481 |
| 13.14264 | 13.16388 | 10.98698 | 11.81011 | P | P | P | 13.51547 |
| 5.450337 | 5.792347 | 6.003213 | 0.373063 | P | P | P | 5.437284 |
| 9.9016   | 9.973848 | 11.211   | 11.07956 | P | P | P | 8.931231 |
| 5.739583 |          |          | A        |   |   |   | 4.209448 |
|          |          |          | 8.18438  |   |   | A |          |
|          |          |          | 6.4954   |   |   | M |          |
| 12.0166  | 12.02597 | 10.94325 | 10.7833  | P | P | P | 11.64046 |
| 10.38365 | 11.19372 | 11.16254 | 12.41717 | P | P | P | 11.38475 |
| 8.335809 | 8.547943 | 6.675527 | 6.861115 | P | P | P | 8.710621 |
| 6.483126 | 7.139949 | 5.189524 | 6.39617  | P | P | P | 6.264569 |
| 6.572609 | 6.570375 | 5.978855 | 5.396666 | P | P | M | 6.298093 |
| 7.510209 | 6.871688 | 8.225137 | 8.134829 | P | P | A | 6.529741 |
| 8.014519 | 7.259418 | 8.4846   | 6.815246 | P | P | P | 8.000989 |
| 6.763683 | 5.955804 |          | 7.727877 | M |   | P | 6.536174 |
| 9.125963 | 8.014061 | 9.601462 | 10.34149 | P | P | P | 8.674277 |
| 8.024647 | 8.79635  | 8.466778 | 8.580296 | P | P | P | 8.418627 |
| 10.42082 | 10.2348  | 10.65632 | 10.15736 | P | P | P | 10.66309 |
| 6.199748 |          | 8.166105 | 7.74342  |   | A | A | 5.779688 |
| 6.225717 | 5.798697 | 6.536857 | 6.268105 | M | P | A | 6.153829 |
| 9.328355 | 7.930266 | 9.976393 | 10.04395 | P | P | P | 7.221152 |
| 4.564543 |          |          | M        |   |   |   | 5.739947 |
|          |          | 2.183894 | 3.231218 |   | P | P |          |
| 7.324619 | 7.14957  | 6.28287  | 6.554558 | P | P | P | 7.494773 |
| 8.964328 | 8.525206 | 8.06569  | 8.451189 | P | P | P | 7.863079 |
| 5.898001 | 6.689534 | 6.205533 | 6.003581 | A | M | P | 7.485423 |
| 10.9984  | 10.46954 | 11.52826 | 11.54112 | P | P | P | 10.38083 |
| 3.132838 |          | 4.482708 | 5.72713  |   | M | M | 5.946068 |
| 10.77179 | 10.60509 | 9.527429 | 9.286063 | P | P | P | 10.19387 |
| 8.49015  | 9.059962 | 8.811941 | 8.119648 | P | P | P | 8.579038 |
| 10.11337 | 9.637218 | 8.402782 | 9.483156 | P | P | P | 9.450094 |
|          | 0.736435 | 4.690733 |          | P | A |   |          |
| 5.998148 | 6.213603 | 1.821981 | A        | P | P |   | 5.707128 |
| 12.85093 | 12.62375 | 9.276541 | 11.49007 | P | P | P | 13.4722  |
| 5.626761 | 4.366498 | 4.592371 | 6.810622 | P | P | M | 5.996748 |

|          |          |          |          |   |   |   |          |
|----------|----------|----------|----------|---|---|---|----------|
| 8.888082 | 9.104004 | 8.362633 | 7.553966 | P | P | P | 8.218636 |
| 7.6325   | 7.926115 | 7.162715 | 6.490158 | P | P | P | 7.954363 |
| 9.569157 | 9.552166 | 10.33048 | 11.97786 | P | P | P | 10.00744 |
|          |          |          | 2.751249 |   |   | P |          |
| 6.612127 | 6.141929 | 5.781689 | P        | P | P |   | 6.671845 |
| 10.67875 | 10.87926 | 11.51965 | 11.09368 | P | P | P | 10.34131 |
|          | 5.301732 |          |          | A |   |   |          |
| 6.773381 | 7.447466 | 7.507402 | 7.238545 | P | P | A | 7.030773 |
| 12.29827 | 10.51862 | 11.56499 | 10.95975 | P | P | P | 9.278935 |
| 5.634034 | 6.035709 | 5.568456 | 6.390614 | P | P | A | 5.509189 |
| 6.042024 |          |          | 2.540135 |   |   | P | 6.34189  |
| 5.734704 | 6.593151 | 6.421829 | 5.425315 | P | P | P | 5.62184  |
| 8.936186 | 9.730028 | 9.473004 | 8.473181 | P | P | P | 10.05606 |
| 8.046349 | 8.18057  | 6.984229 | 8.214497 | P | P | P | 8.20634  |
| 8.729588 | 9.172923 | 10.45763 | 9.610799 | P | P | P | 9.378204 |
| 7.582335 | 6.489205 | 7.641037 | 8.468812 | P | P | P | 7.786182 |
| 12.63878 | 12.79763 | 11.96879 | 11.54125 | P | P | P | 12.45301 |
|          | 6.794583 | 5.540544 | 7.094122 | A | P | A |          |
| 9.873467 | 9.461531 | 8.979837 | 8.739657 | P | P | P | 9.43639  |
| 7.091418 | 8.430435 | 7.845799 | 6.08645  | P | P | P | 8.057784 |
|          |          | 4.390588 |          |   | P |   |          |
| 6.36028  |          |          | A        |   |   |   | 3.389134 |
| 3.467246 |          |          | P        |   |   |   | 5.83937  |
|          | 6.096471 |          |          | P |   |   |          |
| 8.463906 | 9.044257 | 8.36714  | 7.617561 | P | P | P | 8.263688 |
| 9.441935 | 8.723928 | 9.984768 | 10.31083 | P | P | P | 9.217744 |
| 10.28937 | 9.287312 | 8.956484 | 10.72659 | P | P | P | 6.874187 |
| 8.698851 | 9.487039 | 8.513907 | 7.45169  | P | P | P | 9.056644 |
| 7.269384 | 6.142646 | 6.56424  | 7.446361 | P | P | P | 6.985856 |
|          | 4.826021 | 5.136157 | 2.511604 | P | P | P |          |
| 9.354938 | 8.017124 | 9.969551 | 10.71827 | P | P | P | 8.396905 |
| 5.87806  | 6.321086 |          | 5.230315 | P |   | P | 6.340823 |
| 6.689359 |          | 7.620616 | A        |   | A |   | 5.545473 |
| 6.215167 | 4.751513 | 6.737439 | 6.827513 | P | P | A | 6.119181 |
| 6.797752 | 6.121678 | 6.20599  | 7.335959 | P | A | A | 6.740992 |
| 5.377425 |          | 5.920692 | A        |   | A |   | 2.932733 |
| 7.205686 | 6.801135 | 7.126685 | 6.025719 | P | P | P | 6.301109 |
| 7.584002 | 6.575798 | 6.879497 | 7.390112 | P | P | P | 6.372534 |
|          | 1.734684 |          | 6.570766 | P |   | P |          |
|          | 5.603074 | 6.345396 | 5.82527  | M | A | P |          |

|          |          |          |            |   |   |   |          |
|----------|----------|----------|------------|---|---|---|----------|
| 5.496918 | 5.642245 | 6.913362 | 7.165358 P | A | P | A | 6.002733 |
|          | 5.959142 | 6.129133 | 7.994979   | P | P | A |          |
| 7.491907 | 7.229507 | 7.627398 | 6.547646 P | P | P | P | 7.447657 |
| 7.566329 | 6.928648 | 6.616452 | P          | P | A |   | 5.687795 |
| 5.70991  | 7.82137  | 7.265373 | 6.601939 P | P | A | P | 6.877341 |
| 8.517378 | 7.657804 | 8.335796 | 8.741529 P | P | P | P | 7.791779 |
|          |          | 6.525245 | 6.445879   |   | A | P |          |
|          | 4.741187 | 5.332085 |            | A | P |   |          |
|          | 5.979312 | 6.717493 | 6.520533   | P | A | A |          |
| 6.453135 |          |          | A          |   |   |   | 3.10184  |
| 6.248113 | 5.689618 | 5.306347 | 3.234881 P | A | P | P | 5.674268 |
| 6.05065  | 6.233588 | 5.217564 | A          | P | P |   | 5.37702  |
| 5.714016 | 5.653722 |          | 6.434595 M | P |   | A | 5.868574 |
| 8.428676 | 9.083529 | 8.725253 | 7.593675 P | P | P | P | 8.896129 |
| 6.351059 | 5.190044 | 3.199744 | 7.449909 A | P | M | P | 5.611523 |
| 11.80098 | 11.96919 | 9.735192 | 10.06195 P | P | P | P | 11.80962 |
|          | 4.44143  | 3.557375 |            | P | P |   |          |
|          | 4.475857 |          |            | P |   |   |          |
| 6.637385 |          |          | 6.038908 A |   |   | P | 6.0318   |
| 8.354093 | 9.201172 | 8.904037 | 7.285046 P | P | P | P | 9.006495 |
| 7.366951 | 7.368755 | 3.316999 | 6.725002 M | P | P | P | 7.133139 |
| 8.538441 | 9.31187  | 9.399174 | 9.203419 P | P | P | P | 8.949032 |
| 5.920514 | 6.943963 | 6.479453 | 7.429493 P | P | P | P | 6.791699 |
| 10.15501 | 9.373442 | 10.58464 | 10.22365 P | P | P | P | 9.287404 |
| 5.960149 | 6.346897 | 6.732115 | 7.041006 P | M | A | P | 7.136115 |
| 7.630995 | 6.963774 | 6.410936 | 7.528918 P | P | P | P | 7.412434 |
| 3.886125 |          |          | 6.731374 P |   |   | P | 4.790203 |
| 7.242644 | 10.06433 | 8.819517 | 8.007405 P | P | P | P | 9.529649 |
| 6.442627 | 6.491429 | 5.784719 | M          | A | M |   | 6.042774 |
| 7.517457 | 7.389166 | 6.836421 | 6.31424 P  | P | P | P | 8.709466 |
| 8.309098 | 7.750451 | 7.904575 | 7.728218 P | P | P | P | 7.275518 |
| 11.52284 | 11.61183 | 10.53954 | 10.32 P    | P | P | P | 11.30878 |
| 8.396646 | 8.333047 | 8.067001 | 10.70274 P | P | P | P | 9.656732 |
| 8.905833 | 8.263472 | 8.277333 | 7.937264 P | P | P | P | 7.625109 |
| 8.709311 | 8.410164 | 9.387802 | 9.301199 P | P | P | P | 8.611688 |
| 12.60693 | 11.93761 | 12.68936 | 12.4762 P  | P | P | P | 11.81285 |
| 11.62849 | 9.963437 | 10.75385 | 11.12998 P | P | P | P | 9.537622 |
| 10.63961 | 10.67092 | 10.13275 | 9.624755 P | P | P | P | 10.57973 |
| 10.45535 | 10.16279 | 11.15372 | 11.61389 P | P | P | P | 9.996779 |
| 6.141954 | 7.05626  | 6.738072 | 7.518163 P | P | P | P | 7.193014 |

|          |          |          |          |   |   |   |   |          |
|----------|----------|----------|----------|---|---|---|---|----------|
| 6.881082 | 8.081922 | 6.509619 | 6.143219 | A | P | P | P | 6.410533 |
| 9.656095 | 9.586652 | 8.932316 | 9.321732 | P | P | P | P | 9.741096 |
| 12.00446 | 11.06847 | 12.73192 | 13.50893 | P | P | P | P | 11.08076 |
| 9.197412 | 10.1437  | 10.29985 | 10.83714 | P | P | P | P | 10.92244 |
| 11.38506 | 11.57327 | 9.584405 | 9.683965 | P | P | P | P | 11.5398  |
|          | 7.399607 | 5.056213 |          | P | M |   |   |          |
| 6.613681 | 5.039595 | 7.320643 | 8.631851 | A | A | A | A | 6.326037 |
| 7.176758 | 7.538325 | 7.027445 | 7.190259 | P | P | P | P | 7.488094 |
| 6.000176 | 5.05974  | 5.907449 | P        | P | A |   |   | 5.479883 |
| 8.491429 | 8.409792 | 7.734099 | 7.825762 | P | P | P | P | 7.96335  |
| 10.30512 | 10.72099 | 9.978223 | 9.056793 | P | P | P | P | 10.18933 |
| 12.65176 | 12.81554 | 12.28585 | 11.99359 | P | P | P | P | 12.45854 |
| 11.45788 | 10.99816 | 12.1597  | 11.60199 | P | P | P | P | 10.65441 |
| 8.581298 | 7.720548 | 8.481867 | 7.876897 | P | P | P | P | 8.042867 |
| 10.12406 | 10.28401 | 11.0509  | 10.5286  | P | P | P | P | 9.763716 |
| 8.936801 | 9.085567 | 8.021129 | 7.430854 | P | P | P | P | 9.345158 |
| 10.63569 | 11.0621  | 10.19834 | 9.517036 | P | P | P | P | 10.98385 |
| 8.228524 | 8.656572 | 7.666613 | 8.918842 | P | P | P | P | 9.119219 |
| 9.80043  | 9.212757 | 8.854485 | 8.371235 | P | P | P | P | 9.032068 |
| 12.4464  | 12.07024 | 11.9195  | 11.45583 | P | P | P | P | 11.41878 |
|          | 5.088614 | 4.693155 | 5.754935 | A | P | P | P |          |
| 4.562733 |          |          | M        |   |   |   |   | 6.4027   |
| 8.031229 | 7.07698  | 7.739085 | 8.728511 | P | P | P | P | 7.85864  |
| 7.155185 | 6.00375  | 7.593483 | A        | A | A |   |   | 5.603126 |
| 10.36728 | 10.2875  | 11.00377 | 12.69619 | P | P | P | P | 10.94012 |
| 8.422009 | 8.794917 | 8.335405 | 7.770906 | P | P | P | P | 8.396087 |
| 6.812398 | 7.638996 | 6.159323 | 7.67557  | P | P | P | P | 7.804109 |
| 4.922676 |          |          | A        |   |   |   |   | 1.087981 |
| 5.82533  | 4.211367 | 5.568664 | A        | M | M |   |   | 1.698521 |
| 9.324534 | 9.848267 | 8.47171  | 7.893838 | P | P | P | P | 9.336239 |
| 6.191145 | 6.525004 | 7.528472 | 8.449403 | P | P | P | P | 6.715437 |
|          | 4.404666 |          |          | P |   |   |   |          |
| 5.498442 | 4.976776 | 5.525625 | M        | A | A |   |   | 4.369563 |
| 9.361752 | 8.436252 | 6.904268 | 9.164222 | P | P | P | P | 8.31596  |
| 12.00724 | 12.41742 | 9.701721 | 9.751199 | P | P | P | P | 12.00911 |
| 5.796282 |          | 4.81903  | 5.673432 |   | P | A |   | 5.099663 |
| 6.248068 | 7.158324 | 5.960719 | 7.290105 | P | P | P | P | 7.166393 |
| 6.714213 | 7.208769 | 6.459135 | 5.66216  | P | P | P | P | 7.242782 |
|          | 4.711903 | 4.163528 |          | P | P |   |   |          |
| 5.674641 | 6.85907  | 6.184815 | 7.165016 | P | P | P | P | 6.280864 |

|          |          |          |          |   |   |   |   |          |
|----------|----------|----------|----------|---|---|---|---|----------|
| 5.838416 | 6.426706 | 6.852796 |          | P | A | P |   | 6.592157 |
| 6.008057 | 6.201314 | 8.110627 | 7.626412 | P | P | P | P | 7.314148 |
| 8.737492 | 7.866908 | 8.943626 | 10.47401 | P | A | P | P | 8.623149 |
| 6.532439 | 6.154989 | 6.848016 | 7.574035 | P | P | P | P | 7.153113 |
| 5.575948 | 4.989708 |          | 6.406492 | A | A |   | A | 4.443783 |
| 6.512482 | 6.930922 | 7.219053 | 6.979327 | P | P | P | P | 7.560949 |
| 9.090633 | 8.578188 | 9.557128 | 8.742196 | P | P | P | P | 8.16855  |
| 10.71582 | 10.49017 | 10.99858 | 10.69887 | P | P | P | P | 10.31618 |
| 9.127757 | 9.031426 | 8.072574 | 8.746708 | P | P | P | P | 9.497249 |
| 13.1044  | 10.63762 | 11.97241 | 11.51726 | P | P | P | P | 9.744139 |
| 5.650012 | 6.101098 | 6.562769 |          | P | A | P |   | 6.971661 |
|          | 7.270016 |          | 3.598289 |   | P |   | P |          |
| 10.50721 | 10.28887 | 9.521668 | 9.254393 | P | P | P | P | 10.93951 |
| 9.888081 | 8.616917 | 8.036353 | 8.553496 | P | P | P | P | 8.785307 |
| 8.61086  | 8.24008  | 8.509384 | 7.691743 | P | P | P | P | 8.201482 |
| 9.816607 | 9.403125 | 8.866624 | 8.718832 | P | P | P | P | 9.181088 |
| 9.395393 | 8.714956 | 8.280422 | 8.873914 | P | P | P | P | 8.062678 |
| 11.47032 | 10.2493  | 11.27737 | 11.28097 | P | P | P | P | 9.885176 |
| 6.773412 | 5.962555 | 7.227061 | 7.715104 | P | P | P | A | 6.163639 |
| 6.924438 | 7.852253 | 6.891436 |          | P | P | P |   | 7.441552 |
| 6.218838 | 7.150706 | 6.564714 |          | P | P | P |   | 7.544727 |
| 8.639918 | 8.183214 | 8.557323 | 8.588323 | P | P | P | P | 7.379154 |
| 10.87438 | 10.35152 | 11.65336 | 11.64494 | P | P | P | P | 10.72672 |
| 11.97286 | 10.43662 | 11.81088 | 11.39337 | P | P | P | P | 9.67125  |
|          |          | 8.968898 | 9.139833 |   |   | A | A |          |
| 7.417308 | 7.128405 | 7.924893 | 7.982641 | A | P | A | P | 5.243432 |
| 2.559746 |          |          |          | P |   |   |   | 5.76189  |
| 7.938507 | 8.904895 | 8.231607 | 9.136645 | P | P | P | P | 9.047295 |
|          |          | 6.990499 |          |   |   | A |   |          |
| 5.183767 |          | 2.320898 | 2.516254 | A |   | P | M | 4.98037  |
| 10.51485 | 10.91686 | 9.953819 | 9.207258 | P | P | P | P | 10.69431 |
| 11.85471 | 10.52243 | 12.02922 | 12.02236 | P | P | P | P | 9.980663 |
| 7.655495 | 7.847194 | 7.197018 | 6.815422 | P | P | P | P | 7.142016 |
| 8.745923 | 8.470465 | 9.46549  | 8.286495 | P | P | P | P | 8.786954 |
| 5.458442 | 6.61007  | 5.314145 |          | P | P | M |   | 7.213241 |
| 6.861506 | 6.049304 | 6.980433 | 7.559516 | P | P | P | P | 7.067959 |
| 6.937135 |          |          |          | A |   |   |   | 5.768196 |
| 10.1829  | 9.37681  | 10.70089 | 10.94633 | P | P | P | P | 9.307793 |
| 9.286533 | 8.951759 | 10.32597 | 11.01836 | A | M | A | A | 9.013471 |
| 6.261762 | 5.645279 |          | 4.118608 | A | P |   | P | 6.056247 |

|          |          |          |          |   |   |   |          |
|----------|----------|----------|----------|---|---|---|----------|
| 9.166197 | 9.358362 | 8.288974 | 8.146733 | P | P | P | 8.762335 |
| 4.850099 | 5.433728 | 5.66042  | 5.955782 | A | M | A | 5.275266 |
|          |          |          | 5.794065 |   |   | A |          |
| 5.893786 | 5.650743 |          | 6.204836 | P |   | A | 5.031063 |
| 10.57099 | 10.17417 | 11.36606 | 11.73432 | P | P | P | 10.24522 |
| 9.270978 | 8.635036 | 9.815162 | 10.62961 | P | P | P | 9.060001 |
| 7.641549 | 8.190739 | 9.364163 | 8.886885 | P | P | P | 8.286982 |
| 10.06302 | 9.992116 | 9.255973 | 9.018702 | P | P | P | 9.767008 |
| 8.169471 | 7.604683 | 6.919681 | 7.295788 | P | P | P | 8.123052 |
| 10.89282 | 10.98435 | 10.27163 | 9.357182 | P | P | P | 11.07666 |
| 5.117906 | 5.033607 | 4.791695 | 5.236198 | P | P | P | 6.053011 |
| 8.560045 | 7.487158 | 7.8519   | 7.924336 | P | P | P | 7.322879 |
| 7.596594 | 7.789341 | 6.771884 | 6.673196 | P | P | M | 7.304704 |
| 8.63633  | 7.902231 | 6.530211 | 7.463901 | P | P | P | 7.219553 |
| 7.23835  | 6.79888  | 7.456067 | 6.684037 | P | P | P | 6.023151 |
| 6.994696 |          |          | 5.441519 |   |   | P | 5.884869 |
| 5.737851 | 4.153439 |          | 5.992639 | P |   | P | 5.308837 |
|          | 3.162226 |          |          | P |   |   |          |
| 15.18819 | 15.31292 | 15.62297 | 16.52589 | P | P | P | 15.26579 |
| 10.13105 | 9.787192 | 10.3504  | 11.51047 | P | P | P | 9.875596 |
| 9.066611 | 9.249251 | 10.09397 | 9.511576 | P | P | P | 8.965228 |
| 8.68954  | 9.242041 | 8.067123 | 7.969149 | P | P | P | 9.412598 |
| 8.96949  | 8.509573 | 6.985276 | 7.208246 | P | P | P | 8.909145 |
| 7.766573 | 7.839068 | 7.223405 | 7.70113  | P | P | P | 6.791192 |
| 11.35322 | 11.07599 | 10.73829 | 10.38878 | P | P | P | 11.01162 |
| 8.66058  | 8.573683 | 9.928171 | 10.91671 | P | P | P | 7.869145 |
| 6.681507 | 7.187538 | 6.099779 | 6.882613 | P | M | P | 5.370432 |
| 6.324038 | 5.284616 | 4.685866 | 5.955596 | P | P | P | 5.573639 |
|          |          | 6.534488 | 8.041227 |   | A | A |          |
| 10.11324 | 9.956927 | 9.775932 | 10.57432 | P | P | P | 9.428415 |
| 8.38436  | 7.542837 | 7.064089 | 7.551757 | P | P | P | 7.776105 |
| 1.606822 |          |          | M        |   |   |   | 5.784623 |
| 7.743586 | 6.70165  | 7.702848 | 7.926597 | P | P | P | 7.750371 |
| 8.343134 | 8.31864  | 7.624775 | 7.648096 | P | P | P | 8.080924 |
| 7.722518 | 7.698733 | 5.85144  | 5.831766 | P | P | P | 7.367609 |
| 6.507347 |          | 6.278594 | 6.262518 |   | A | A | 5.58286  |
| 9.264724 | 9.469208 | 8.162646 | 6.999139 | P | P | P | 9.041753 |
|          |          | 3.949746 |          |   | P |   |          |
|          | 7.949708 |          |          | A |   |   |          |
| 5.656856 | 5.81599  |          | P        | M |   |   | 5.99122  |

|          |          |          |          |   |   |   |   |          |
|----------|----------|----------|----------|---|---|---|---|----------|
| 5.568029 |          |          |          | P |   |   |   | 7.099282 |
| 9.593282 | 9.275576 | 10.15633 | 10.23816 | P | P | P | P | 9.726486 |
| 8.52544  | 8.428445 | 9.256114 | 10.07572 | A | P | P | P | 8.534588 |
| 9.819136 | 10.18517 | 10.0555  | 9.070833 | P | P | P | P | 10.0921  |
| 7.462694 | 7.872738 | 7.807942 | 6.713329 | P | P | P | P | 7.514058 |
| 7.010387 | 7.052395 | 5.379536 | 5.854475 | P | P | P | P | 6.94399  |
| 7.621988 | 9.654402 | 7.770023 | 8.454245 | P | P | P | P | 9.599838 |
| 9.115201 | 9.333866 | 9.762228 | 10.38945 | P | P | P | P | 9.205514 |
| 8.509784 | 8.203002 | 9.155886 | 9.316809 | P | P | P | P | 7.999694 |
| 10.94968 | 11.03147 | 11.70807 | 11.91343 | P | P | P | P | 11.40267 |
| 7.65046  | 8.102133 | 7.77206  | 8.007089 | P | P | P | P | 8.30633  |
|          | 4.116308 | 5.918614 |          | P | P |   |   |          |
| 6.95245  | 7.094142 | 6.295612 | 8.426356 | P | P | P | P | 7.078703 |
| 6.390658 |          |          | 8.134098 | A |   |   | A | 5.452319 |
| 5.427018 |          |          | 6.081443 | A |   |   | A | 5.365847 |
| 2.532194 |          |          |          | M |   |   |   | 5.259902 |
| 9.23806  | 8.66975  | 9.650198 | 9.979964 | P | P | P | P | 9.078469 |
| 7.022048 | 7.214489 | 7.089533 | 7.317432 | A | P | P | P | 5.741236 |
| 5.339495 | 4.67596  |          |          | A |   |   |   | 4.277198 |
| 7.113383 | 6.835427 | 6.491725 | 6.184423 | P | P | P | P | 7.462881 |
| 9.54655  | 9.531792 | 10.15372 | 10.76519 | P | P | P | P | 9.662177 |
| 12.46773 | 12.51144 | 13.261   | 12.23865 | P | P | P | P | 11.62911 |
| 8.11797  | 7.096973 | 7.395489 | 7.07312  | P | P | P | P | 8.145582 |
| 11.56197 | 11.02348 | 10.18999 | 9.844132 | P | P | P | P | 10.80434 |
| 8.396102 | 8.492897 | 7.849053 | 7.722736 | P | P | P | P | 8.660137 |
| 10.78954 | 10.96032 | 10.33553 | 10.00933 | P | P | P | P | 10.7924  |
| 10.88993 | 10.58169 | 9.97614  | 10.51381 | P | P | P | P | 10.83969 |
| 9.649125 | 9.303463 | 8.874723 | 8.674815 | P | P | P | P | 9.331518 |
| 4.777068 |          |          | 6.865001 | M |   |   | A | 5.939672 |
| 9.808926 | 10.25283 | 10.75426 | 10.74723 | P | P | P | P | 10.02457 |
| 7.413845 | 6.669158 | 6.514061 | 4.883755 | P | P | P | P | 7.249333 |
| 8.039824 | 5.455698 | 6.88412  | 7.465419 | P | P | P | P | 7.369457 |
| 6.186628 |          |          |          | A |   |   |   | 5.165783 |
| 4.920828 | 5.312858 |          | 6.120837 | P |   |   | A | 6.25224  |
| 5.67049  | 6.384111 | 5.629828 |          | P | P |   |   | 6.712179 |
| 9.933574 | 10.00125 | 9.326104 | 9.019098 | P | P | P | P | 9.762038 |
| 12.63468 | 12.52953 | 11.92403 | 11.60044 | P | P | P | P | 12.33656 |
|          | 5.771688 |          |          | P |   |   |   |          |
| 9.689804 | 8.896771 | 9.738318 | 9.100992 | P | P | P | P | 8.169872 |
| 5.960663 | 4.943986 | 2.523291 |          | A | P |   |   | 5.936769 |



|          |          |          |          |   |   |   |          |
|----------|----------|----------|----------|---|---|---|----------|
| 10.42549 | 9.817069 | 10.36798 | 10.19818 | P | P | P | 9.394129 |
| 8.080676 | 7.54816  | 7.203933 | 6.524699 | P | P | P | 7.687588 |
| 7.401924 | 6.813225 | 7.80359  | 7.837531 | P | A | P | 7.319109 |
| 7.085277 | 7.336283 | 4.575162 | 6.626374 | P | P | P | 8.644624 |
| 5.942135 | 5.835702 | 3.609342 | 5.555824 | P | P | P | 5.513489 |
| 8.848132 | 7.179928 | 6.254825 | 7.209671 | P | P | P | 6.660388 |
| 10.55932 | 10.9617  | 9.611055 | 9.9985   | P | P | P | 11.15206 |
| 8.721935 | 8.70201  | 8.554338 | 8.599176 | P | P | P | 7.158164 |
| 9.541571 | 9.140938 | 9.818364 | 9.79859  | P | P | P | 9.113224 |
| 6.973139 | 6.866931 | 6.541048 | 3.138233 | P | P | M | 7.215324 |
| 9.915574 | 9.907721 | 9.412456 | 9.885541 | P | P | P | 10.53927 |
| 11.63124 | 11.92171 | 12.54306 | 11.69282 | P | P | P | 11.41608 |
| 7.588923 | 8.38118  | 8.841283 | 9.278267 | P | P | P | 8.288742 |
| 9.109699 | 9.301991 | 9.612398 | 9.349012 | P | P | P | 8.893661 |
| 13.20751 | 12.77293 | 12.50155 | 12.19146 | P | P | P | 12.66621 |
| 10.83409 | 9.990538 | 10.15272 | 9.529141 | P | P | P | 9.604468 |
| 7.07854  | 6.909098 | 7.309294 | 7.483123 | P | P | P | 7.310197 |
| 11.75604 | 12.16778 | 12.76923 | 12.96741 | P | P | P | 11.95931 |
| 7.767481 | 6.543339 | 5.625033 | 3.129037 | P | P | P | 6.616703 |
| 5.909396 | 6.039252 | 5.342105 | A        | P | P |   | 0.88878  |
| 11.47716 | 9.747485 | 10.45223 | 10.99708 | P | P | P | 10.72921 |
|          | 7.391215 |          | 6.783357 | P |   | P |          |
| 10.12748 | 10.6077  | 10.3576  | 9.218589 | P | P | P | 10.28364 |
| 8.406716 | 8.20818  | 6.517849 | 7.171796 | P | P | P | 8.358953 |
| 10.5501  | 10.58426 | 8.918719 | 8.90447  | P | P | P | 10.42652 |
| 10.24874 | 10.33808 | 8.814047 | 8.839346 | P | P | P | 10.35086 |
| 9.186505 | 8.59463  | 10.22077 | 10.36724 | P | P | P | 9.148317 |
| 9.229771 | 8.882893 | 10.04566 | 9.852181 | P | P | P | 8.679941 |
| 9.931591 | 9.691075 | 10.72765 | 10.03505 | P | P | P | 8.935275 |
| 7.540533 | 6.926961 | 8.014696 | 9.225191 | P | P | A | 7.462726 |
| 7.956812 | 7.833594 | 8.918363 | 9.536437 | P | P | P | 8.119844 |
| 9.753715 | 9.888202 | 10.75586 | 11.48274 | P | P | P | 10.08351 |
| 5.702292 | 5.19078  | 7.448492 | 8.806781 | P | M | P | 7.302317 |
| 7.124174 | 7.339624 | 7.299541 | 6.899079 | P | P | P | 7.532533 |
|          |          | 3.93745  | 4.830126 |   | P | M |          |
| 13.2776  | 13.09326 | 13.73977 | 15.04949 | P | P | P | 13.85453 |
| 11.62663 | 11.26255 | 10.76245 | 10.31618 | P | P | P | 11.17208 |
| 6.849984 | 7.516666 | 6.688583 | 6.790923 | P | P | P | 4.385234 |
| 9.573172 | 9.503896 | 9.707462 | 8.030303 | P | P | P | 9.028347 |
| 8.186328 | 8.077655 | 9.33497  | 9.486086 | P | P | P | 7.753573 |

|          |          |          |          |   |   |   |          |
|----------|----------|----------|----------|---|---|---|----------|
| 10.74019 | 11.00101 | 12.7373  | 11.74939 | P | P | P | 9.538658 |
| 5.22438  | 4.909497 | 4.762591 | M        | M | P |   | 5.704962 |
| 10.75686 | 10.85911 | 10.25716 | 9.393213 | P | P | P | 10.31074 |
| 9.918171 | 9.270083 | 8.991701 | 9.485889 | P | P | P | 9.839118 |
| 5.355218 | 2.632411 | 5.557585 | A        | P | A |   | 3.204593 |
|          | 5.711751 |          | 2.95149  | P |   | P |          |
| 5.445687 |          | 5.647913 | 6.734998 |   | A | A | 1.697063 |
| 5.892387 | 4.840646 | 4.640689 | 6.17381  | P | P | P | 4.757495 |
| 8.727188 | 7.220813 | 9.248241 | 8.366618 | P | P | P | 7.127728 |
| 6.621174 | 6.681244 | 6.148431 | 5.755625 | P | P | P | 7.564859 |
| 9.958529 | 9.071701 | 10.29813 | 10.03687 | P | P | P | 8.952107 |
| 5.663609 | 5.653388 | 6.82395  | A        | A | A |   | 5.519364 |
| 4.816396 | 4.6874   | 6.030246 | 6.71512  | P | P | A | 5.541623 |
| 6.126159 | 6.125453 | 7.034345 | 7.594019 | M | A | A | 6.197043 |
| 6.823907 | 6.61863  | 5.848562 | 6.015792 | P | P | P | 7.338825 |
| 14.30416 | 15.01497 | 15.28624 | 15.44241 | P | P | P | 15.05217 |
| 6.13417  |          | 6.206927 | 6.224123 |   | A | A | 6.129622 |
| 4.953288 |          |          | P        |   |   |   | 6.153213 |
| 5.926998 | 7.259457 | 7.304844 | 2.610114 | P | P | P | 6.252963 |
| 9.780248 | 9.393779 | 8.068875 | 8.233332 | P | P | P | 9.494204 |
| 11.24952 | 10.2138  | 9.195387 | 8.968582 | P | P | P | 10.75071 |
|          | 3.055528 |          |          | P |   |   |          |
| 6.007908 |          |          | A        |   |   |   | 4.997079 |
| 7.342653 | 8.270295 | 6.716158 | 5.779584 | P | P | P | 7.766697 |
| 4.086334 | 6.163643 |          | 6.800455 | A |   | P | 6.305092 |
|          |          | 6.165756 | 6.793771 |   | A | P |          |
| 11.87332 | 11.21312 | 11.13613 | 10.55205 | P | P | P | 11.11924 |
| 7.393542 | 7.071229 | 6.446806 | 6.75103  | P | M | P | 6.880758 |
|          |          | 1.823623 |          |   | P |   |          |
| 5.661805 |          |          | A        |   |   |   | 3.248023 |
| 5.649467 |          |          | 2.088792 | A |   | P | 5.01251  |
|          | 6.014797 |          |          | A |   |   |          |
| 6.643697 | 6.413855 | 6.78845  | 6.94303  | P | P | P | 6.805982 |
|          | 6.616136 | 6.658114 |          | A | P |   |          |
| 6.55574  | 5.716661 | 4.629309 | 5.951158 | P | P | P | 5.916901 |
| 3.232413 |          |          | P        |   |   |   | 6.039876 |
| 6.268986 | 6.796126 | 5.938895 | 6.740347 | P | P | A | 7.307302 |
|          | 4.645829 |          |          | A |   |   |          |
| 6.529045 | 4.611789 |          | 5.991204 | M |   | P | 6.726296 |
|          |          | 4.152615 |          |   | P |   |          |

|          |          |          |          |   |   |   |   |          |
|----------|----------|----------|----------|---|---|---|---|----------|
| 5.417751 | 4.79149  | 4.689364 | 5.720665 | P | A | P | P | 5.179619 |
| 6.729023 |          | 7.926804 |          | A |   | A |   | 6.700535 |
| 8.474644 | 9.453922 | 8.632521 | 9.759965 | P | P | P | P | 9.864224 |
| 6.827581 | 6.841278 | 7.66679  | 7.275116 | A | P | P | A | 5.713743 |
|          | 5.920003 |          | 8.055204 |   | P |   | A |          |
|          | 9.530981 | 8.71632  | 9.50392  |   | P | P | P |          |
| 6.169344 | 5.755562 | 5.28718  | 6.884724 | P | P | P | A | 5.962303 |
| 5.149436 | 4.894362 |          |          | A | A |   |   | 4.563672 |
| 5.862924 | 5.604473 |          |          | A | P |   |   | 4.790309 |
| 6.492071 | 6.377031 | 7.975051 | 7.620936 | A | P | A | A | 6.354802 |
|          |          | 6.080405 |          |   |   | A |   |          |
| 5.578944 | 5.187572 |          | 6.809769 | A | P |   | A | 5.601911 |
|          | 6.379597 |          | 6.810643 |   | A |   | P |          |
|          |          |          | 5.200187 |   |   |   | P |          |
| 6.73549  | 6.185813 | 7.127312 | 7.563025 | P | A | P | P | 6.445022 |
| 5.704207 | 5.248396 | 5.185702 | 7.050754 | P | M | P | P | 6.412    |
| 5.522934 | 5.938781 | 2.510568 |          | A | A | M |   | 5.302088 |
| 5.720243 | 6.566507 | 8.474982 | 9.136325 | P | A | M | A | 7.152657 |
|          |          | 3.248873 |          |   |   | P |   |          |
|          | 7.327178 |          |          |   | A |   |   |          |
|          |          |          | 7.77318  |   |   |   | A |          |
|          |          |          | 7.840415 |   |   |   | A |          |
| 7.74015  | 6.474672 | 6.140893 | 6.729576 | P | P | P | P | 7.369964 |
| 8.488333 | 7.697334 | 6.889835 | 5.948989 | P | P | P | P | 7.827938 |
|          |          |          | 9.173129 |   |   |   | A |          |
|          |          | 5.082978 | 5.41911  |   |   | P | P |          |
| 5.744455 |          | 6.026516 |          | P |   | A |   | 5.473772 |
| 9.785788 | 9.727296 | 7.833263 | 8.119387 | P | P | P | P | 9.665769 |
| 8.025565 | 7.615086 | 8.932752 |          | A | A | A |   | 7.573816 |
|          |          |          | 7.372627 |   |   |   | A |          |
| 7.457169 | 7.300253 | 6.220872 | 6.302686 | P | P | P | P | 6.716088 |
| 6.346192 | 6.588985 | 5.170877 | 6.590726 | P | P | P | P | 7.514364 |
| 7.284082 | 8.31265  | 5.691992 | 6.889285 | P | P | P | P | 7.943251 |
| 6.089727 |          | 3.314874 |          | A |   | M |   | 5.642876 |
| 6.971679 | 6.428007 | 7.082002 | 7.729603 | P | P | A | P | 6.792085 |
| 6.324958 | 5.764978 |          | 5.190458 | P | P |   | P | 6.442422 |
| 8.368195 | 7.282421 | 7.316167 | 8.322186 | P | P | P | P | 7.341445 |
|          | 4.537166 | 3.611072 |          | A | A | P |   |          |
|          | 5.805409 | 7.119496 |          | P | P | M |   |          |
| 10.26158 | 9.957811 | 9.627421 | 9.586502 | P | P | P | P | 10.11551 |

|          |          |          |            |   |   |   |          |
|----------|----------|----------|------------|---|---|---|----------|
| 10.11673 | 9.11818  | 9.362668 | 11.25337 P | P | P | P | 9.344688 |
| 2.512499 |          |          | 5.749476 P |   |   | M | 5.60176  |
| 5.135644 | 5.729275 | 5.039689 | 6.186057 P | M | P | P | 5.589414 |
| 5.963558 | 5.821598 |          | 3.709652 P | P |   | P | 6.775267 |
| 5.95497  | 5.831346 | 2.880931 | 6.549833 A | P | P | P | 5.227124 |
| 9.165283 | 8.694881 | 7.634448 | 7.886825 P | P | P | P | 8.884969 |
|          |          | 3.231353 |            |   | P |   |          |
| 5.515453 | 5.040763 | 4.966012 | 2.51157 P  | M | P | P | 6.160646 |
| 9.828464 | 9.758635 | 11.50383 | 10.8567 P  | P | P | P | 9.642347 |
| 5.607491 | 6.155309 | 5.560008 | 5.646293 P | P | P | P | 7.2299   |
| 4.409322 |          |          | M          |   |   |   | 7.169829 |
| 6.468691 | 6.538644 |          | A          | P |   |   | 3.918519 |
| 8.37641  | 8.27256  | 9.09164  | 9.093431 P | P | P | P | 7.263187 |
| 6.916057 | 8.026467 | 7.1835   | 7.699989 P | P | P | P | 8.355389 |
| 8.570751 | 8.665395 | 7.823194 | 6.931619 P | P | P | P | 8.789456 |
|          |          |          | 7.322695   |   |   | A |          |
| 9.771084 | 9.668432 | 8.947831 | 10.10133 P | P | P | P | 10.60305 |
| 7.405805 | 8.146276 | 7.87605  | 8.051816 P | P | P | A | 7.641863 |
| 5.642397 |          |          | 5.636545 A |   |   | P | 2.347565 |
| 8.651449 | 7.748024 | 8.429399 | 8.92006 P  | P | P | P | 7.900377 |
| 5.794854 |          | 4.589891 | A          |   | P |   | 1.270435 |
| 7.263304 | 8.582842 | 10.42036 | 9.583367 P | P | P | P | 7.8546   |
|          | 5.341707 | 5.390743 |            | P | A |   |          |
| 6.635368 | 6.062523 | 7.347329 | 7.385873 P | P | P | P | 7.031489 |
|          | 5.885934 | 6.582676 | 6.20486    | A | A | A |          |
| 9.36821  | 8.946334 | 8.550242 | 8.474278 P | P | P | P | 9.055291 |
| 5.554802 |          |          | 7.595581 P |   |   | A | 6.549978 |
| 5.3241   | 5.780007 | 5.68132  | 7.263342 P | P | P | A | 5.995764 |
|          | 5.668959 |          | 3.322339   | A |   | P |          |
| 6.306355 |          | 6.466287 | 6.383542 A |   | A | A | 5.78823  |
| 7.869556 | 7.175478 | 5.94382  | 7.265028 P | P | P | A | 7.175685 |
| 4.556906 |          |          | P          |   |   |   | 6.231162 |
| 6.869619 | 7.504577 | 8.297424 | 7.598749 P | P | P | A | 6.904576 |
| 5.035555 |          |          | 3.972643 A |   |   | P | 3.39182  |
| 7.45495  | 7.979676 | 7.059114 | 6.542842 P | P | P | P | 7.674938 |
| 7.513819 | 7.398027 | 6.17288  | 6.081176 P | P | P | P | 7.721316 |
|          | 4.364809 |          |            | P |   |   |          |
| 5.579117 | 5.647005 | 6.031168 | 7.275022 P | P | P | A | 6.300384 |
|          | 3.344117 | 6.569073 |            | P | M |   |          |
| 7.537805 | 7.540201 | 8.161477 | 7.943234 M | P | P | P | 6.809385 |

|          |          |          |          |   |   |   |          |
|----------|----------|----------|----------|---|---|---|----------|
| 9.536972 | 9.066717 | 9.277355 | 8.508276 | P | P | P | 9.896994 |
| 9.900092 | 9.421916 | 10.1456  | 9.341462 | P | P | P | 8.877286 |
|          | 6.129568 |          | 6.345371 | A |   | A |          |
| 7.103384 | 5.962729 | 6.731317 | 7.236369 | P | P | A | 6.710315 |
| 5.79633  |          | 4.233565 | M        |   | P |   | 6.549571 |
| 6.355471 | 6.373001 | 5.099785 | 5.83489  | A | P | P | 5.97722  |
| 8.403827 | 8.430336 | 8.937013 | 10.28736 | P | P | P | 9.021946 |
| 9.098247 | 9.017442 | 8.83345  | 9.724063 | P | P | P | 9.448422 |
|          | 5.662178 |          |          | A |   |   |          |
| 11.71225 | 12.34652 | 10.35358 | 10.35199 | P | P | P | 11.79346 |
| 7.721367 | 7.887205 | 7.208613 | 6.650837 | P | P | P | 8.218194 |
| 13.92199 | 14.17276 | 13.19713 | 12.81649 | P | P | P | 13.86608 |
| 8.652385 | 8.779329 | 7.709237 | 8.823017 | P | P | P | 8.428064 |
| 10.51156 | 10.70415 | 9.099628 | 8.286204 | P | P | P | 10.39556 |
| 12.28808 | 11.81593 | 12.41618 | 12.15947 | P | P | P | 11.44498 |
|          | 5.786679 |          | 6.683227 | P |   | A |          |
| 8.404175 | 9.106959 | 8.097922 | 7.45134  | P | P | P | 9.066036 |
| 7.085095 | 8.02047  | 6.898071 | 6.770004 | P | P | P | 6.410098 |
|          |          | 7.512248 | 7.698579 |   | A | P |          |
| 8.179666 | 8.051604 | 7.244629 | 6.145064 | P | P | P | 7.082118 |
| 7.6611   | 7.013905 | 7.817182 | 8.597118 | P | P | P | 7.299094 |
| 5.178006 | 5.478378 | 5.995408 | P        | P | P |   | 6.650788 |
| 7.698655 | 7.863444 | 8.088449 | 8.964257 | P | P | P | 8.104513 |
| 6.733694 | 6.846074 | 7.171013 | 6.330952 | P | P | P | 7.236368 |
| 8.4489   | 7.602635 | 7.529223 | 7.209278 | P | P | P | 9.705289 |
| 7.217543 | 6.304739 | 7.410434 | 5.363334 | A | M | P | 5.589717 |
| 8.445084 | 7.492709 | 8.484393 | 7.817471 | P | P | P | 7.388409 |
| 6.06633  |          |          | A        |   |   |   | 3.375296 |
| 7.696575 | 6.804767 | 6.923623 | 3.534674 | A | P | A | 5.759432 |
| 4.931535 | 1.557108 |          | P        | P |   |   | 5.036686 |
| 4.744752 |          | 5.826716 | P        |   | A |   | 6.191571 |
|          |          | 2.526948 |          |   | M |   |          |
|          | 2.85771  |          |          | P |   |   |          |
| 11.07015 | 10.44023 | 11.03698 | 10.66961 | P | P | P | 9.982916 |
| 9.638119 | 9.251511 | 10.02388 | 9.201205 | P | P | P | 9.752005 |
| 5.226117 | 6.547252 | 5.159399 | 7.152343 | P | A | P | 6.068405 |
| 7.683552 | 5.919436 | 5.815731 | P        | P | M |   | 6.32493  |
| 5.53086  | 6.936844 | 6.161542 | 6.42809  | P | M | P | 7.111924 |
|          | 5.668943 |          |          | P |   |   |          |
| 6.968349 | 6.437645 | 3.521975 | P        | P | P |   | 6.21919  |

|          |          |          |          |   |   |   |   |          |
|----------|----------|----------|----------|---|---|---|---|----------|
| 7.03725  | 7.236824 | 6.510665 | 7.20492  | A | P | P | P | 6.51822  |
| 7.444057 | 7.097158 | 7.104125 | 8.429948 | P | P | A | A | 7.740958 |
| 8.333662 | 8.799665 | 7.639524 | 7.779443 | P | P | P | P | 8.766455 |
| 11.73985 | 12.44771 | 10.82963 | 11.31789 | P | P | P | P | 12.11524 |
| 8.232035 | 7.422588 | 6.851179 | 6.315804 | P | P | P | P | 7.582264 |
| 11.93227 | 10.17351 | 11.81225 | 11.94128 | P | P | P | P | 10.2284  |
| 9.810359 | 9.16124  | 9.467962 | 9.631171 | P | P | P | P | 8.676228 |
| 6.467312 | 6.634421 | 7.998478 | 7.1391   | P | P | P | P | 6.910453 |
| 4.928838 | 5.543932 |          | P        | A |   |   |   | 5.991117 |
| 5.098096 | 4.96542  | 5.758724 | 6.042416 | P | P | P | P | 6.652422 |
| 6.575158 | 6.764114 | 5.211852 | 6.128407 | P | P | P | P | 7.292622 |
| 7.030201 | 7.678807 | 7.226172 | 6.375907 | P | A | P | P | 6.804204 |
| 6.364676 | 4.863883 | 5.874852 | 6.413286 | A | M | P | M | 4.560941 |
|          |          | 5.091562 |          |   |   | M |   |          |
| 5.885725 | 2.579942 |          | P        | P |   |   |   | 5.798362 |
| 9.017461 | 8.355757 | 8.114316 | 8.57517  | P | P | P | P | 8.426961 |
| 6.272175 |          |          | 0.886803 | A |   |   | P | 5.790868 |
|          |          |          | 6.387934 |   |   |   | A |          |
| 5.566187 | 4.471471 | 4.709174 | 3.487144 | A | A | P | P | 5.922758 |
| 8.008116 | 7.397804 |          | 9.412153 | A |   |   | A | 7.815226 |
|          | 3.006667 |          |          | P |   |   |   |          |
|          | 5.16372  | 6.655304 |          | P | A |   |   |          |
| 10.94859 | 9.924471 | 11.828   | 12.7139  | P | P | P | P | 9.981545 |
| 7.45559  | 7.046996 | 5.964946 | 5.742885 | P | A | P | P | 6.674669 |
| 9.380682 | 9.942947 | 7.97572  | 7.079768 | P | P | P | P | 9.545369 |
| 8.048399 | 7.557965 | 8.943197 | 8.810365 | P | P | P | P | 9.014774 |
| 11.78849 | 11.3619  | 12.1686  | 12.45498 | P | P | P | P | 11.12993 |
| 10.57261 | 10.75744 | 10.47848 | 9.36119  | P | P | P | P | 10.71829 |
| 8.81401  | 9.477856 | 10.07584 | 9.751343 | P | P | P | P | 8.644176 |
| 7.538369 | 7.794566 | 7.182919 | 4.86519  | P | P | P | P | 8.031631 |
| 7.185173 | 7.227862 | 7.379487 | 8.293852 | P | P | P | P | 7.656037 |
|          |          |          | 6.740134 |   |   |   | A |          |
| 5.359811 |          | 6.091749 | A        |   | A |   |   | 2.908754 |
| 12.19194 | 11.92491 | 11.05906 | 10.82649 | P | P | P | P | 12.3094  |
| 8.646703 | 8.852384 | 8.02992  | 7.983489 | P | P | P | P | 8.854357 |
| 9.373921 | 9.789414 | 9.774933 | 8.661629 | P | P | P | P | 9.366269 |
| 12.8098  | 12.13898 | 13.36198 | 13.19665 | P | P | P | P | 12.10282 |
| 7.210589 | 6.697578 | 5.926994 | 6.939694 | P | P | P | P | 7.017    |
| 9.135924 | 9.333094 | 8.818714 | 7.119108 | P | P | P | P | 8.378276 |
| 6.930647 | 6.141154 | 6.454221 | 4.952749 | A | P | P | P | 6.431414 |

|          |          |          |          |   |   |   |          |
|----------|----------|----------|----------|---|---|---|----------|
| 7.268067 | 7.296756 | 6.346505 | 6.176333 | P | P | P | 6.980458 |
| 7.07144  | 7.6104   | 6.076305 | 6.77867  | P | P | P | 6.787903 |
| 8.652092 | 9.059339 | 10.21125 | 9.686268 | P | P | P | 8.328761 |
| 5.861912 |          |          | 5.984865 |   |   | P | 1.567696 |
|          | 5.258424 |          | 3.594987 | A |   | P |          |
| 8.560152 | 7.873891 | 7.205214 | 5.458165 | P | P | P | 7.793419 |
| 4.639162 |          |          | 7.131311 |   |   | A | 5.697784 |
|          | 5.526503 | 5.298803 | 1.356435 | P | P | P |          |
| 5.888    | 6.551302 | 5.759684 | 6.233738 | P | P | A | 6.476469 |
| 8.499756 | 7.550023 | 6.865621 | 5.961218 | P | P | P | 7.883812 |
| 8.101851 | 7.54812  |          |          | P |   |   | 6.572487 |
| 7.090451 | 6.673304 |          | 6.20525  | P |   | P | 5.731905 |
| 6.006836 | 6.544421 | 6.491703 | 6.844944 | P | P | A | 6.259872 |
|          | 6.620638 | 7.46099  |          | A | A |   |          |
|          |          | 3.518965 |          |   | P |   |          |
| 7.978233 | 8.315175 | 8.627863 | 9.255778 | P | P | P | 8.512099 |
| 8.32529  | 9.166478 | 6.582193 | 6.473968 | P | P | P | 9.756043 |
| 6.702379 | 6.844549 | 5.742613 | 4.557718 | P | P | P | 7.073033 |
| 9.544204 | 10.44319 | 6.888612 | 8.670574 | P | P | P | 10.77905 |
| 11.70249 | 11.89164 | 11.56988 | 10.6789  | P | P | P | 11.59002 |
| 10.22569 | 10.35178 | 9.589031 | 9.823755 | P | P | P | 10.90788 |
| 9.159999 | 9.321986 | 8.979052 | 6.793912 | P | P | P | 9.035004 |
|          | 4.540313 |          |          | A |   |   |          |
| 7.384194 | 7.400974 | 6.422733 | 6.498238 | P | P | P | 7.671628 |
| 6.999366 | 7.010222 | 2.555513 |          | P | P |   | 5.85835  |
| 6.896516 | 5.496621 | 6.746338 |          | P | P |   | 5.426276 |
| 8.703682 | 8.188571 | 7.266398 | 2.509457 | P | P | P | 7.5424   |
| 10.21452 | 10.28962 | 9.237322 | 8.680055 | P | P | P | 10.05948 |
| 7.676635 | 7.053816 | 7.003248 | 7.698141 | P | P | P | 6.218051 |
| 6.300912 | 5.963236 | 7.376952 | 7.711031 | M | A | A | 6.468132 |
| 5.454041 |          |          | 3.672504 |   |   | P | 4.052122 |
| 10.49159 | 10.47051 | 10.1944  | 9.732548 | P | P | P | 10.06473 |
| 6.176571 |          | 6.531038 | 6.740566 |   | A | A | 5.997365 |
| 8.111637 | 9.370868 | 9.636195 | 9.369133 | P | P | P | 8.711441 |
| 7.648825 | 5.958466 | 7.880621 | 8.479236 | P | A | A | 6.033361 |
| 7.975202 | 7.890382 | 8.340522 | 7.02921  | P | P | P | 7.708108 |
| 8.1217   | 8.404304 | 7.661288 | 8.286852 | P | P | P | 8.31399  |
| 5.208471 |          |          |          |   |   |   | 6.517724 |
|          |          |          | M        |   |   |   |          |
|          |          | 4.713612 |          |   | M |   |          |
|          | 4.851991 |          | 7.052353 | P |   | A |          |

|          |          |          |          |   |   |   |          |
|----------|----------|----------|----------|---|---|---|----------|
| 8.73479  | 7.807203 | 9.020564 | 9.791036 | P | P | P | 8.769565 |
| 8.709659 | 8.248632 | 7.514575 | 7.070709 | P | P | P | 8.356675 |
| 8.141445 | 7.211111 | 8.23206  | 9.072916 | P | P | P | 7.932359 |
| 9.557833 | 8.888672 | 9.328248 | 11.44661 | P | P | P | 10.41873 |
| 7.436033 | 6.927732 | 8.272737 | 8.328241 | P | P | P | 7.066447 |
| 9.891795 | 9.329145 | 11.07844 | 10.83676 | P | P | P | 9.251846 |
| 5.048908 |          |          | 6.208989 |   |   | A | 5.476662 |
| 8.757783 | 8.127098 | 8.901427 | 8.829525 | P | P | P | 8.529342 |
|          |          |          | 7.572984 |   |   | A |          |
|          | 5.708036 |          |          | A |   |   |          |
| 5.029578 | 5.617352 | 3.338303 | P        | P | M |   | 5.955453 |
| 7.273714 | 6.405038 | 5.699    | 7.011175 | P | P | P | 5.990662 |
| 6.285519 |          |          | 8.446225 |   |   | P | 5.384654 |
| 8.830732 | 8.541995 | 9.400625 | 9.296388 | P | P | P | 8.913308 |
| 5.819054 | 6.234883 | 2.756984 | 4.652527 | A | P | P | 5.670427 |
| 9.320114 | 8.951872 | 8.698598 | 8.223358 | P | P | P | 9.167337 |
| 4.951131 | 6.179583 | 7.889207 | 8.082891 | P | A | P | 7.266221 |
| 9.106715 | 9.730518 | 10.82356 | 11.91657 | P | P | P | 9.965956 |
| 6.171057 | 5.845258 | 5.328267 | 6.946138 | P | P | P | 6.798523 |
| 11.78808 | 12.15346 | 10.34474 | 10.64154 | P | P | P | 12.11114 |
| 7.033993 | 5.820695 | 5.411344 | 6.0797   | P | P | P | 5.819427 |
| 8.819682 | 8.0266   | 8.393003 | 8.935593 | P | P | P | 8.193531 |
| 8.504847 | 8.909745 | 8.448085 | 8.25001  | P | P | P | 6.742088 |
| 5.196777 |          |          | A        |   |   |   | 4.10109  |
| 7.552463 | 6.869312 | 8.537015 | 8.678533 | P | P | P | 7.378785 |
| 9.315216 | 9.564548 | 7.533872 | 6.288757 | P | P | P | 9.489531 |
| 6.767465 | 3.95065  | 4.996471 | M        | P | P |   | 6.320966 |
|          |          |          | 6.357371 |   |   | A |          |
|          |          | 4.769455 | 6.774981 |   | M | A |          |
| 9.241632 | 7.986881 | 7.63773  | 9.159261 | P | P | P | 6.564555 |
|          | 3.437484 | 6.077908 | 6.508224 | P | A | A |          |
| 5.174305 | 6.437014 | 3.277191 | P        | A | P |   | 6.573019 |
| 7.729886 | 7.516238 | 7.0453   | 7.113632 | P | P | P | 7.412475 |
| 6.520712 | 7.971754 | 7.989497 | 7.969664 | P | P | P | 8.821244 |
| 6.750445 | 7.185221 | 6.156788 | 4.950351 | P | P | P | 6.951969 |
| 9.418424 | 8.790782 | 10.14737 | 10.09482 | P | P | P | 8.595561 |
| 9.702209 | 8.439627 | 9.681722 | 11.27635 | P | P | P | 9.873101 |
| 8.292488 | 8.360321 | 9.163885 | 9.734143 | P | P | P | 8.811132 |
|          |          | 3.103675 |          |   | M |   |          |
| 10.21395 | 10.89741 | 9.838138 | 9.409532 | P | P | P | 10.54907 |



|          |          |          |            |   |   |   |          |
|----------|----------|----------|------------|---|---|---|----------|
| 3.377056 |          |          | 6.486097 M |   |   | A | 5.915685 |
| 8.500969 | 8.207787 | 9.217963 | 10.77855 P | P | P | P | 8.218477 |
| 8.03604  | 9.137463 | 8.804667 | 9.141789 P | P | P | P | 9.102358 |
| 9.953942 | 10.2413  | 10.9486  | 10.22101 P | P | P | P | 10.5075  |
| 6.873722 | 8.053238 | 7.156179 | 7.633317 P | P | P | P | 8.375362 |
| 8.903656 | 9.350726 | 8.206858 | 7.54546 P  | P | P | P | 8.68507  |
| 9.683337 | 9.106023 | 10.40591 | 10.71796 P | P | P | P | 10.01806 |
| 7.942772 | 8.035771 | 7.833613 | 7.531838 P | P | P | P | 7.994566 |
| 7.312435 | 8.76107  | 8.68741  | 7.085317 P | P | P | P | 8.021749 |
| 8.332494 | 7.734422 | 8.9565   | 8.845936 P | P | P | P | 8.094198 |
| 9.110214 | 8.230791 | 9.87102  | 9.983904 P | P | P | P | 8.440886 |
| 7.801774 | 8.501517 | 7.329365 | 7.017761 P | P | P | P | 8.180098 |
| 5.106905 |          |          | M          |   |   |   | 6.442411 |
| 7.23633  | 5.751413 | 7.799547 | 8.265823 A | A | A | A | 5.742993 |
| 5.805249 | 7.354778 | 5.912921 | 7.241644 A | P | P | P | 5.400817 |
| 5.915125 |          |          | 7.297815 A |   |   | A | 5.717835 |
| 5.858662 |          |          | 2.452882 A |   |   | P | 4.569918 |
| 8.440828 | 7.844817 | 9.420224 | 9.009205 P | P | P | P | 7.497002 |
| 9.312013 | 8.511567 | 10.33196 | 10.0731 P  | P | P | P | 7.788807 |
| 7.729652 | 7.795545 | 8.174178 | 7.593877 P | P | P | P | 7.68663  |
|          |          |          | 4.479967   |   |   | P |          |
| 10.42532 | 9.632992 | 11.57406 | 11.67312 P | P | P | P | 9.543887 |
| 9.613399 | 11.2313  | 10.07847 | 8.937123 P | P | P | P | 10.63471 |
|          | 2.699507 | 5.820518 | 6.383247   | M | A | A |          |
| 8.186183 | 7.395328 | 7.516813 | 8.003866 P | A | P | A | 7.358634 |
| 6.639124 | 5.835658 | 6.715092 | 6.344339 P | P | M | P | 6.084897 |
| 7.968026 | 6.500128 | 7.296816 | 7.346077 P | P | M | P | 6.560167 |
| 4.104615 |          |          | M          |   |   |   | 5.663698 |
| 6.380725 | 4.83585  | 5.620563 | P          | A | A |   | 5.317296 |
| 6.588131 | 6.939675 | 5.656671 | 7.219244 P | P | P | P | 4.676286 |
|          | 2.281026 |          |            | M |   |   |          |
| 7.025482 | 5.40269  |          | P          | P |   |   | 7.285849 |
| 8.920461 | 7.562884 | 9.423386 | 8.737788 P | P | P | P | 6.88408  |
| 8.631924 | 8.262389 | 7.575418 | 7.593394 P | P | P | P | 7.491516 |
| 8.781131 | 9.276867 | 11.46583 | 11.3928 P  | P | P | P | 8.019136 |
| 9.821994 | 8.861564 | 11.22349 | 10.9491 P  | P | P | P | 8.456203 |
|          | 3.915146 | 5.350524 |            | P | A |   |          |
| 7.000822 | 6.632829 | 6.41612  | 5.936595 P | P | P | P | 6.998163 |
| 8.728317 | 8.771494 | 7.971129 | 7.400123 P | P | P | P | 7.997332 |
| 10.22315 | 10.15512 | 11.01355 | 10.96063 P | P | P | P | 10.54869 |

|          |          |          |            |   |   |   |          |
|----------|----------|----------|------------|---|---|---|----------|
| 11.62598 | 11.55262 | 12.35532 | 13.0489 P  | P | P | P | 11.92469 |
| 7.878732 | 7.917378 | 8.391982 | 9.096252 P | P | P | P | 7.577472 |
| 11.91434 | 11.878   | 10.88747 | 10.23802 P | P | P | P | 9.95223  |
| 7.135459 |          | 7.29159  | 8.405033 P |   | A | P | 7.301763 |
| 12.2375  | 12.52653 | 11.28015 | 11.0986 P  | P | P | P | 12.50562 |
| 5.863174 |          | 6.802638 | 7.054831 P |   | P | A | 7.487928 |
| 10.21605 | 9.128409 | 9.265262 | 9.304778 P | P | P | P | 9.716118 |
| 8.238498 | 7.223306 | 8.035466 | 8.441387 P | P | M | P | 8.374871 |
| 7.82869  | 8.372196 | 7.389769 | 7.644104 P | P | P | P | 8.420526 |
| 5.856484 | 7.053001 | 7.034214 | 6.469587 M | P | A | P | 7.032027 |
| 6.997122 | 6.909962 | 1.699244 | A          | A | P |   | 4.14724  |
| 11.17929 | 11.63072 | 10.71772 | 11.12358 P | P | P | P | 11.34681 |
| 9.22103  | 9.666023 | 8.57871  | 8.466845 P | P | P | P | 9.124891 |
| 9.047252 | 8.008373 | 9.459909 | 9.060888 P | P | P | P | 7.820204 |
|          |          | 1.142561 |            |   | P |   |          |
| 9.302004 | 8.770363 | 9.865872 | 9.560788 P | P | P | P | 8.755219 |
| 7.54863  | 7.420829 | 7.924557 | 8.066957 A | P | A | P | 6.420356 |
| 9.636601 | 10.48833 | 9.420932 | 9.171599 P | P | P | P | 10.55191 |
| 10.20919 | 10.92053 | 9.920993 | 9.390911 P | P | P | P | 10.64875 |
| 6.551312 | 6.981823 | 7.354137 | P          | P | P |   | 7.930611 |
| 8.570548 | 8.569229 | 9.287    | 9.069974 P | P | P | P | 8.964375 |
| 9.872992 | 10.33387 | 8.706732 | 9.221548 P | P | P | P | 10.08948 |
| 6.992524 | 7.045343 | 7.078754 | P          | A | P |   | 7.077496 |
| 7.64494  | 5.676019 |          | 6.862958 P | P |   | P | 7.637168 |
| 10.10498 | 9.770375 | 9.195967 | 8.496971 P | P | P | P | 9.3663   |
| 5.081451 |          |          | 5.764175 A |   |   | P | 1.622786 |
| 7.022335 | 7.865595 | 5.693601 | 4.909275 P | P | P | P | 7.715083 |
| 6.630824 | 7.37207  | 8.462411 | 7.866961 P | P | P | P | 7.043138 |
|          | 0.59375  |          |            | M |   |   |          |
|          |          | 3.874551 | 6.587845   |   | P | M |          |
| 6.276337 | 8.130325 | 7.975612 | P          | P | P |   | 7.520623 |
| 5.609183 | 1.207467 |          | A          | M |   |   | 5.30974  |
| 8.85717  | 8.469085 | 7.926704 | 7.665411 P | P | P | P | 8.706671 |
| 7.210902 | 7.694511 | 7.731939 | 6.391905 P | P | P | P | 6.07707  |
| 10.57177 | 9.613783 | 9.408957 | 8.915535 P | P | P | P | 10.37901 |
|          |          | 5.33109  | 6.558969   |   | M | P |          |
| 8.644208 | 7.619957 | 8.234548 | 7.514115 P | P | P | P | 7.335529 |
| 5.442032 |          | 5.316883 | 5.529292 P |   | P | A | 5.250045 |
| 7.752519 | 8.621326 | 8.378044 | 7.929085 P | P | P | P | 7.852039 |
| 6.617987 | 6.691851 | 6.975924 | A          | P | P |   | 5.617161 |

|          |          |          |          |   |   |   |   |          |
|----------|----------|----------|----------|---|---|---|---|----------|
| 6.516401 | 5.987256 |          | 4.079792 | A |   | M |   | 6.088618 |
| 7.353481 | 8.221787 | 7.04056  | 7.379702 | P |   | P | P | 7.540762 |
| 8.669107 | 8.026177 | 8.781539 | 9.119774 | P |   | P | P | 8.391408 |
| 4.973079 |          | 5.263162 | 5.845537 | A |   | P | A | 4.049535 |
| 6.472642 | 1.067031 | 5.666996 | 4.878019 | M | P | A | M | 4.822107 |
| 7.014701 | 6.591976 | 6.705158 | 3.113385 | P | P | P | P | 5.702002 |
| 7.983094 | 7.328987 | 7.743138 | 7.987195 | P | P | P | P | 6.523015 |
| 5.879194 |          | 6.734619 |          | P |   | A |   | 6.667564 |
| 9.659122 | 9.635178 | 10.37226 | 10.89103 | P | P | P | P | 10.42981 |
| 9.674454 | 8.920011 | 8.699151 | 9.296992 | P | P | P | P | 8.560152 |
| 8.361535 | 8.076368 | 8.930349 | 9.90579  | P | P | P | P | 8.436781 |
| 10.42939 | 9.260927 | 10.35651 | 9.947981 | P | P | P | P | 8.483096 |
| 7.034422 | 8.112721 | 8.236783 | 7.780284 | P | P | P | A | 7.407242 |
| 8.657049 | 8.816441 | 9.646714 | 8.994709 | P | P | P | P | 9.150826 |
| 9.313254 | 8.723429 | 9.179937 | 10.28193 | P | P | P | P | 8.989479 |
| 9.422565 | 8.403286 | 9.594574 | 9.660396 | P | P | P | P | 8.359254 |
| 5.821372 |          | 4.026559 |          | P |   | P |   | 6.137304 |
| 9.316682 | 8.392072 | 9.86893  | 9.629739 | P | P | P | P | 8.216829 |
| 6.881598 | 6.506571 | 7.30879  | 7.625705 | A | P | P | P | 6.312747 |
|          | 1.35971  |          |          |   | P |   |   |          |
| 6.058581 | 4.522983 |          |          | P | P |   |   | 6.861472 |
| 9.377252 | 9.923177 | 9.361214 | 8.614778 | P | P | P | P | 9.61624  |
| 7.029961 | 7.907535 | 5.997916 |          | P | P | P |   | 7.240939 |
| 6.722409 | 6.749369 | 6.93367  | 8.440467 | P | P | P | P | 6.878881 |
|          |          |          | 6.674761 |   |   |   | M |          |
| 5.3337   | 5.578294 | 4.976574 |          | A | P | P |   | 4.285417 |
| 7.771595 | 7.792136 | 8.839632 | 7.432474 | P | P | P | P | 8.139396 |
| 8.417125 | 8.210126 | 8.021685 | 8.610884 | P | P | P | P | 8.229623 |
| 10.09228 | 8.410208 | 9.189816 | 8.346711 | P | P | P | P | 8.824938 |
| 6.644135 | 7.059614 | 5.338115 |          | A | P | P |   | 5.906133 |
| 9.226257 | 9.092965 | 10.01651 | 9.033411 | P | P | P | P | 8.648497 |
| 3.263424 | 5.149558 |          | 9.188095 | P | P |   | P | 6.531234 |
| 12.2586  | 12.36038 | 11.76888 | 11.39633 | P | P | P | P | 12.10987 |
|          |          | 7.187773 |          |   |   | A |   |          |
|          |          | 7.885969 | 7.341598 |   |   | A | A |          |
| 11.24458 | 11.28753 | 10.65621 | 10.33627 | P | P | P | P | 11.1576  |
| 10.96037 | 10.97187 | 10.48695 | 10.71805 | P | P | P | P | 11.45907 |
| 10.34787 | 10.93673 | 9.570933 | 8.934178 | P | P | P | P | 10.65437 |
| 7.195437 | 7.915625 | 7.766231 | 7.452554 | P | P | P | P | 7.351661 |
| 9.235971 | 10.61218 | 10.03762 | 10.36248 | P | P | P | P | 10.45163 |

|          |          |          |            |   |   |   |          |
|----------|----------|----------|------------|---|---|---|----------|
|          | 6.14789  |          |            | A |   |   |          |
| 7.320309 | 6.943233 | 7.961396 | 8.193971 P | P | P | A | 7.672698 |
| 6.859755 |          |          | A          |   |   |   | 5.729488 |
| 10.18735 | 9.527329 | 10.19541 | 10.84903 P | P | P | P | 9.848098 |
| 9.53225  | 9.881869 | 10.72104 | 10.24646 P | P | P | P | 10.34631 |
| 10.61114 | 10.37954 | 9.571307 | 9.560657 P | P | P | P | 10.38214 |
| 5.42372  |          |          | 3.526085 A |   |   | M | 5.650984 |
| 5.527279 | 5.814507 | 7.162977 | 5.223562 P | P | P | M | 5.895531 |
| 8.30286  | 7.773092 | 8.668989 | 9.933657 P | P | P | P | 8.53122  |
| 5.742897 | 5.643242 | 6.747071 | A          | A | A |   | 7.180212 |
| 9.693888 | 9.988011 | 8.427652 | 8.798503 P | P | P | P | 10.14316 |
| 8.927462 | 9.034586 | 7.291337 | 8.337194 P | P | P | P | 9.286225 |
| 6.943403 | 5.578949 | 6.994122 | 8.041282 P | P | P | P | 6.802549 |
| 8.20093  | 9.892349 | 9.080041 | 7.328967 P | P | P | P | 9.49064  |
| 6.88862  | 5.816013 |          | A          | P |   |   | 5.24348  |
| 10.32018 | 11.18762 | 10.57036 | 9.674303 P | P | P | P | 10.94584 |
| 10.33835 | 10.63628 | 9.967327 | 8.750978 P | P | P | P | 10.1141  |
| 8.685673 | 8.52175  | 10.68585 | 10.35817 P | P | P | P | 7.830965 |
| 7.597792 | 7.02629  | 7.424808 | 8.408915 P | P | P | P | 7.448287 |
| 8.101797 | 7.564523 | 8.520342 | 8.197172 P | A | P | P | 7.326549 |
| 9.638051 | 9.021035 | 8.504597 | 9.034878 P | P | P | P | 9.070606 |
| 10.13334 | 10.25589 | 11.51222 | 11.97555 P | P | P | P | 10.44092 |
| 8.655942 | 9.168824 | 10.42536 | 10.31389 P | P | P | P | 9.719617 |
| 8.289371 | 8.513253 | 8.927163 | 9.561218 P | P | P | P | 7.751729 |
| 8.910992 | 9.552398 | 8.779228 | 8.295109 P | P | P | P | 9.147985 |
| 10.46223 | 10.39359 | 8.819521 | 9.789113 P | P | P | P | 10.98354 |
| 6.555944 | 6.553113 | 6.968885 | 7.003784 P | P | P | P | 6.775947 |
| 9.142475 | 9.224423 | 8.346851 | 8.004367 P | P | P | P | 9.18374  |
| 8.400195 | 7.424265 | 7.172082 | 7.774544 P | P | P | P | 8.044838 |
| 10.69466 | 9.172606 | 11.06744 | 11.44434 P | P | P | P | 8.690261 |
| 7.430265 | 8.421266 | 8.210775 | 7.447375 P | P | P | P | 7.854876 |
|          |          | 7.280098 | 6.262533   |   | M | A |          |
|          | 6.777597 | 2.550707 |            | A | P |   |          |
| 6.562054 | 6.304519 | 6.720258 | 6.480895 P | P | M | P | 7.220608 |
| 8.166172 | 7.466133 | 9.039664 | 8.66956 P  | P | P | A | 7.743124 |
| 9.366865 | 8.950475 | 9.338636 | 9.795601 P | P | P | P | 8.958532 |
| 6.385787 | 5.785218 | 7.423693 | 7.421672 P | P | P | M | 6.647405 |
| 11.41036 | 11.59149 | 10.35101 | 10.14048 P | P | P | P | 11.16593 |
|          |          | 6.187566 |            |   | A |   |          |
| 12.13125 | 12.21461 | 10.88862 | 11.23762 P | P | P | P | 12.37968 |

|          |          |          |          |   |   |   |          |
|----------|----------|----------|----------|---|---|---|----------|
| 6.537153 | 6.920673 | 6.648586 | 6.141509 | P | P | P | 6.404872 |
| 12.3802  | 12.84496 | 12.40906 | 12.98025 | P | P | P | 12.51198 |
| 10.94791 | 11.489   | 10.99434 | 11.16872 | P | P | P | 11.01414 |
| 9.469386 | 9.188097 | 8.812473 | 7.70615  | A | P | P | 9.168009 |
| 10.86124 | 11.1872  | 11.94342 | 12.92331 | P | P | P | 11.44164 |
|          |          | 4.078183 |          |   | M |   |          |
| 6.856243 | 7.160534 | 5.580654 | 5.428643 | P | P | P | 7.187392 |
| 10.29997 | 9.451167 | 9.005659 | 9.116679 | P | P | P | 9.879378 |
| 7.059263 | 6.604294 | 6.640408 | 6.409896 | P | P | P | 7.362954 |
| 6.580105 | 6.761554 | 6.719923 | 6.532514 | P | P | P | 6.135351 |
| 6.31606  | 5.346791 | 3.777139 |          | P | P |   | 5.318019 |
| 8.779059 | 8.19951  | 9.836969 | 9.853426 | P | P | P | 8.345472 |
| 5.974156 | 6.317309 | 6.712349 | 8.263157 | A | M | A | 7.470665 |
| 5.60819  | 5.377613 |          | 6.955173 | P |   | M | 6.077222 |
| 8.788657 | 8.627509 | 6.742799 | 8.038226 | P | P | P | 9.252406 |
| 6.521372 | 7.185916 | 8.54938  | 8.572017 | P | P | P | 6.757351 |
| 10.80064 | 10.47273 | 11.33856 | 11.52013 | P | P | P | 10.53542 |
| 5.562585 | 5.914459 | 3.535191 |          | P | P |   | 6.256742 |
| 6.687075 | 6.853637 | 6.434183 |          | P | P |   | 6.965477 |
| 8.140402 | 7.89004  | 6.879446 | 7.114516 | P | P | P | 7.690122 |
|          |          | 5.884397 | 6.075672 |   | P | P |          |
| 7.131903 | 7.73146  | 5.659275 |          | P | P |   | 7.217804 |
| 10.24822 | 10.35029 | 9.837036 | 9.210324 | P | P | P | 10.11514 |
| 4.434481 | 5.828623 |          | 6.467505 | P |   | P | 5.995448 |
| 6.476646 | 6.164619 | 5.719298 | 6.717336 | P | P | P | 6.460331 |
| 8.865145 | 8.430586 | 9.173399 | 9.190218 | P | P | P | 8.823617 |
| 8.926469 | 9.080431 | 8.539342 | 7.410571 | P | P | P | 8.918547 |
| 7.316295 | 5.999775 | 6.493582 | 6.619954 | P | P | P | 7.084901 |
| 9.892289 | 10.73258 | 11.31144 | 10.42205 | P | P | P | 11.18184 |
| 5.336163 | 6.743226 | 6.583621 | 6.845439 | P | P | P | 6.756104 |
| 6.662918 | 6.804839 | 6.761607 | 7.401216 | P | P | M | 7.192568 |
| 11.21804 | 11.31128 | 10.96685 | 10.43029 | P | P | P | 11.25943 |
| 11.26162 | 11.72018 | 11.65666 | 12.39223 | P | P | P | 11.52934 |
| 6.189514 | 6.627139 | 7.733579 | 8.051774 | A | A | M | 5.24358  |
| 9.183144 | 9.206357 | 10.17062 | 10.81759 | P | P | P | 9.176509 |
| 11.33266 | 11.24295 | 11.03942 | 10.28783 | P | P | P | 11.05013 |
| 7.661171 | 7.668512 | 8.600536 | 8.419544 | P | P | P | 8.543346 |
|          | 6.137937 | 1.270045 |          | P | P |   |          |
| 6.019399 | 6.638026 | 6.386447 | 6.664493 | P | P | P | 7.788411 |
|          |          | 7.078879 |          |   | A |   |          |

|          |          |          |          |   |   |   |          |
|----------|----------|----------|----------|---|---|---|----------|
| 10.17847 | 10.67884 | 10.85701 | 11.16498 | P | P | P | 10.3887  |
| 6.241915 | 6.760149 | 5.874925 | 6.681999 | P | P | P | 6.791286 |
| 8.335919 | 7.890793 | 8.405103 | 8.782948 | P | P | P | 7.989873 |
| 8.339002 | 7.064529 | 7.340403 | P        | A | P |   | 7.8758   |
|          |          |          | 4.026521 |   |   | P |          |
| 7.997521 | 8.335167 | 9.044659 | 7.733616 | P | P | P | 7.533562 |
| 11.22804 | 11.38541 | 12.09276 | 12.38926 | P | P | P | 11.11252 |
| 9.984289 | 10.13339 | 11.16228 | 10.85354 | P | P | P | 10.20526 |
| 9.798199 | 9.364912 | 10.36723 | 11.39663 | P | P | P | 10.08431 |
| 7.489158 | 7.177129 | 6.999819 | 7.413795 | P | P | A | 6.794419 |
|          | 6.523737 | 3.925347 |          | A | M |   |          |
| 7.662212 | 6.851702 | 4.742803 | 6.326037 | P | P | P | 7.52747  |
| 7.322385 | 7.827522 | 8.510212 | A        | P | P |   | 7.189675 |
| 8.589031 | 9.767872 | 11.27332 | 10.89386 | P | P | P | 8.927607 |
| 8.808745 | 8.951728 | 8.122149 | 8.316651 | P | P | P | 8.893439 |
| 7.516736 | 7.831614 | 8.450514 | 8.020887 | P | P | P | 7.681157 |
| 10.28447 | 10.35349 | 9.608439 | 9.390222 | P | P | P | 10.04222 |
| 8.133418 | 6.301311 | 7.265717 | 7.747461 | M | A | M | 6.888294 |
|          | 4.945639 |          |          | A |   |   |          |
| 8.374996 | 9.333809 | 9.083313 | 8.035792 | P | P | P | 8.850987 |
| 7.412584 | 7.675624 | 7.460288 | 7.287089 | P | A | A | 7.627598 |
| 7.343641 | 7.097292 | 8.032082 | 6.797875 | P | P | P | 6.644616 |
| 6.041199 | 5.786127 | 5.290621 | A        | P | P |   | 5.03949  |
| 9.064895 | 9.51822  | 8.690128 | 8.207772 | P | P | P | 9.626808 |
|          | 0.877184 | 3.113165 |          | M | P |   |          |
| 10.37084 | 9.866805 | 11.23002 | 11.2714  | P | P | P | 9.963944 |
| 5.589927 | 6.391991 | 6.120957 | A        | A | P |   | 4.634108 |
| 6.238293 | 6.637413 | 5.367833 | P        | P | P |   | 7.166425 |
| 2.720108 |          | 5.407671 | P        |   | P |   | 5.993722 |
| 9.847715 | 9.67267  | 8.271079 | 9.192057 | P | P | P | 10.40288 |
|          | 5.741963 |          | 5.295138 | A |   | P |          |
| 8.138264 | 7.940608 | 9.311059 | 9.339663 | P | P | P | 8.322382 |
| 9.517102 | 10.26474 | 8.075332 | 8.083528 | P | P | P | 10.02749 |
| 6.483925 | 6.427563 | 5.854831 | P        | P | P |   | 6.231145 |
| 7.550948 | 8.15936  | 7.433504 | A        | P | P |   | 6.209108 |
| 5.772732 | 5.441289 |          | P        | P |   |   | 7.021475 |
| 8.774324 | 8.943873 | 9.769736 | 10.24163 | P | P | P | 9.353677 |
|          | 2.822268 |          |          | P |   |   |          |
| 6.882045 | 6.39443  | 5.483242 | P        | P | P |   | 6.276019 |
| 7.895006 | 6.857142 | 7.012755 | 6.763732 | P | P | P | 7.815292 |

|          |          |          |          |   |   |   |          |
|----------|----------|----------|----------|---|---|---|----------|
| 10.66901 | 9.203172 | 9.556256 | 9.375296 | P | P | P | 9.614849 |
| 9.473672 | 8.11229  | 8.560675 | 8.359703 | P | P | P | 8.066963 |
| 10.12473 | 10.26354 | 10.95413 | 11.1571  | P | P | P | 10.09788 |
| 6.265185 | 5.943101 | 5.228223 | P        | A | P |   | 6.352227 |
|          | 5.632563 | 4.877085 |          | A | P |   |          |
| 6.184365 | 4.759806 | 5.444109 | P        | P | P |   | 6.238869 |
| 8.358674 | 8.599348 | 8.659935 | 9.37652  | P | P | P | 8.222852 |
| 12.47361 | 12.55947 | 12.00618 | 11.3694  | P | P | P | 12.20201 |
| 7.188731 | 7.253361 | 7.069952 | 5.987453 | P | P | P | 6.919318 |
| 8.96557  | 8.602898 | 9.998304 | 10.85362 | P | P | P | 8.388407 |
| 8.176936 | 8.603372 | 9.205524 | 8.270906 | P | P | P | 8.731227 |
| 8.281275 | 7.862032 | 6.833012 | 6.803698 | P | P | P | 7.564866 |
| 8.21119  | 8.09289  | 7.71999  | 6.913005 | P | P | P | 7.662966 |
| 7.717854 |          | 8.238165 | 8.769683 |   | P | A | 7.015328 |
| 8.781496 | 8.878929 | 9.765282 | 9.650182 | P | P | P | 9.080248 |
| 2.397584 |          |          | P        |   |   |   | 5.563645 |
| 2.397584 |          |          | P        |   |   |   | 5.563645 |
| 11.29678 | 11.25304 | 11.72314 | 12.43581 | P | P | P | 11.13633 |
|          | 3.685363 |          |          | P |   |   |          |
|          |          | 6.525353 |          |   |   | A |          |
|          |          | 6.93973  |          |   |   | A |          |
| 8.740441 | 7.885965 | 7.86557  | 7.698516 | P | P | P | 8.53918  |
| 5.782419 |          | 5.05138  | A        |   | P |   | 6.297216 |
| 7.705714 | 6.445895 | 7.73979  | 6.84666  | P | P | A | 6.857138 |
|          |          | 5.740527 |          |   | A |   |          |
| 7.871563 | 7.227919 | 7.388695 | 6.417254 | P | P | P | 6.945701 |
| 5.422135 |          |          | 6.566318 |   |   | A | 7.100818 |
| 9.293109 | 9.727397 | 10.35137 | 10.64422 | P | P | P | 9.351937 |
| 9.675942 | 10.58121 | 9.176944 | 9.016877 | P | P | P | 10.44673 |
| 9.837684 | 10.02804 | 9.089581 | 8.588866 | P | P | P | 9.778362 |
|          | 2.512212 |          |          | M |   |   |          |
| 7.719324 |          |          | 8.48198  |   |   | P | 8.435085 |
| 12.46937 | 13.17346 | 11.91057 | 11.46119 | P | P | P | 13.09761 |
| 9.592794 | 10.45585 | 11.21156 | 10.83942 | P | P | P | 10.57114 |
| 10.38622 | 10.64672 | 11.37724 | 12.03252 | P | P | P | 10.64698 |
| 8.079677 | 8.325048 | 9.99636  | 9.029617 | P | P | P | 8.028194 |
| 8.02366  | 8.701642 | 7.933686 | 8.132827 | P | P | P | 8.505816 |
| 9.687655 | 8.81507  | 10.63776 | 9.764458 | P | P | P | 9.41953  |
| 6.110539 | 4.991026 | 5.438342 | 6.577844 | P | P | P | 5.85218  |
| 6.851608 | 5.597177 | 7.835091 | 7.906951 | P | P | P | 5.688872 |

|          |          |          |          |   |   |   |          |
|----------|----------|----------|----------|---|---|---|----------|
| 10.73814 | 11.30642 | 10.61854 | 10.04596 | P | P | P | 11.19163 |
| 4.973753 |          |          | P        |   |   |   | 6.140632 |
| 9.765859 | 9.722723 | 8.157533 | 7.636704 | P | P | P | 9.486605 |
|          | 5.676624 | 5.968788 |          | A | P |   |          |
| 7.718829 | 7.558395 | 6.723048 | 6.577792 | P | P | P | 6.885846 |
| 7.144846 | 6.400406 | 7.207898 | 7.594039 | P | P | A | 6.439267 |
| 7.553862 | 7.504627 | 6.670776 | 5.907027 | P | P | P | 7.6812   |
| 8.778781 | 8.222461 | 8.338306 | 8.699329 | P | P | P | 7.706881 |
| 7.884682 | 7.800287 | 8.16671  | 7.61521  | P | P | P | 7.43622  |
| 8.020376 | 7.678745 | 8.263523 | 7.918189 | P | P | P | 6.555779 |
| 9.165547 | 10.44122 | 8.748261 | 10.1973  | P | P | P | 11.07839 |
| 6.52894  |          |          | A        |   |   |   | 5.373225 |
| 7.757469 | 7.829569 | 8.294405 | 8.825487 | P | P | P | 7.746543 |
| 12.73317 | 12.79659 | 12.0385  | 11.8495  | P | P | P | 12.67347 |
|          |          | 5.434396 |          |   | M |   |          |
| 10.79924 | 10.6359  | 10.19052 | 10.46364 | P | P | P | 11.05256 |
| 8.697233 | 8.489528 | 9.022167 | 9.76973  | P | P | P | 8.684325 |
| 5.083292 |          | 2.962969 | 4.446686 |   | P | P | 5.253296 |
| 8.450759 | 8.47408  | 7.656402 | 8.450627 | P | P | P | 8.460329 |
| 10.15387 | 8.737577 | 9.71944  | 9.50489  | P | P | P | 8.766682 |
| 6.558455 | 8.306327 | 6.647049 | 7.797319 | P | P | P | 7.891185 |
| 6.328029 | 6.850217 | 5.078376 | 5.66834  | P | P | P | 7.448999 |
| 5.93074  |          | 6.839316 | 6.481412 |   | A | P | 6.344593 |
| 7.156815 | 5.942704 | 7.072643 | 7.589676 | P | P | A | 6.40348  |
| 7.364666 | 6.529233 | 7.88035  | 7.959087 | M | A | P | 7.681374 |
| 7.51758  | 7.743258 | 6.417905 | 7.469445 | P | P | P | 7.890837 |
| 7.039724 | 8.232574 | 6.2065   | 8.078081 | P | P | P | 8.477924 |
| 7.497892 | 7.403726 | 7.516631 | 7.440907 | P | P | P | 7.757482 |
| 8.128252 | 7.894015 | 9.507126 | 10.36328 | P | P | P | 8.029792 |
| 5.59245  |          |          | 6.048287 |   |   | P | 6.328997 |
|          | 5.210655 |          |          | A |   |   |          |
| 9.664948 | 8.846456 | 8.546643 | 9.891405 | P | P | P | 9.781082 |
| 9.201411 | 9.142032 | 7.782793 | 7.190469 | P | P | P | 9.511507 |
| 2.993824 |          | 1.711567 | P        |   | P |   | 6.395536 |
| 7.080517 | 7.29654  | 8.237502 | 7.830483 | P | P | M | 6.77396  |
| 7.749782 | 8.162332 | 6.718575 | 7.252554 | P | P | P | 6.901218 |
| 10.67356 | 11.15893 | 10.30159 | 9.223445 | P | P | P | 10.56583 |
|          | 6.958431 | 3.947574 |          | A | P |   |          |
| 6.929182 | 5.973583 | 6.41959  | 6.144353 | P | P | P | 6.66906  |
| 9.168567 | 9.537348 | 8.794794 | 7.191592 | P | P | P | 9.203894 |



|          |          |          |          |   |   |   |   |          |
|----------|----------|----------|----------|---|---|---|---|----------|
| 7.843266 | 7.508465 | 8.358237 | 8.578261 | A | A | P | A | 7.110541 |
| 8.296838 | 8.312015 |          | M        | A |   |   |   | 8.798236 |
| 7.366424 | 6.600435 | 6.486871 | 6.529146 | P | A | P | A | 7.513812 |
| 9.879296 | 10.1571  | 8.965301 | 8.708525 | P | P | P | P | 10.58552 |
| 5.778721 | 6.30297  | 5.339976 | P        | A | P |   |   | 5.791861 |
| 6.974024 | 6.455873 | 7.571841 | 7.350373 | P | P | M | M | 6.90149  |
|          |          |          | 6.111183 |   |   |   | A |          |
| 11.21257 | 10.74997 | 10.51964 | 10.28002 | P | P | P | P | 10.49282 |
| 8.830683 | 8.870037 | 7.872848 | 7.990957 | P | P | P | P | 8.701402 |
| 10.29426 | 10.03034 | 9.863049 | 9.595957 | P | P | P | P | 10.15698 |
| 7.494918 | 7.162895 | 8.301898 | P        | P | P |   |   | 6.898713 |
| 8.859631 | 8.578371 | 9.306197 | 9.705271 | P | P | P | P | 8.249976 |
| 9.178556 | 8.953095 | 8.395622 | 7.197732 | P | P | P | P | 8.949522 |
| 9.295827 | 8.330573 | 9.047251 | 8.977086 | P | P | P | P | 7.76286  |
| 6.675615 |          | 6.657814 | 6.820013 | A |   | A | A | 5.191551 |
| 6.40079  | 6.561801 | 6.242273 | A        | A | A |   |   | 6.780842 |
| 6.346019 | 6.20256  | 8.601203 | 7.191284 | P | P | P | M | 6.66225  |
| 7.489457 | 7.847462 | 6.88195  | 6.57888  | P | P | P | P | 7.358587 |
| 5.446574 | 6.142329 | 5.481808 | 3.642271 | M | P | A | P | 6.032829 |
|          | 1.159115 | 5.174575 | 5.159934 | M | P | P | A |          |
| 6.680152 | 5.835842 | 5.584426 | 6.459265 | A | M | P | A | 5.474328 |
| 5.67185  | 7.529243 | P        |          | P |   |   |   | 8.450165 |
| 8.874438 | 7.183747 | 7.645328 | 7.236603 | P | P | P | P | 7.42464  |
| 10.65019 | 9.802003 | 9.745132 | 9.810354 | P | P | P | P | 10.1519  |
| 7.185158 | 5.787523 | 7.814434 | 7.427737 | P | P | P | P | 7.358369 |
| 7.892931 | 7.416117 | 7.55591  | 6.367113 | P | P | P | P | 7.37754  |
| 7.351857 | 7.687189 | 7.85299  | 7.36977  | P | P | P | P | 7.166092 |
| 5.997444 | 5.866153 | P        |          | A |   |   |   | 5.34525  |
| 13.92466 | 13.81618 | 11.14234 | 12.46474 | P | P | P | P | 14.41214 |
|          |          |          | 1.115089 |   |   |   | P |          |
| 7.570177 | 8.146398 | 5.859974 | 6.198877 | P | P | P | P | 7.594779 |
| 11.32069 | 11.01478 | 9.98432  | 9.789488 | P | P | P | P | 11.4768  |
| 10.09403 | 10.53996 | 11.00853 | 11.71068 | P | P | P | P | 10.74777 |
| 11.25587 | 10.65405 | 9.930192 | 9.574183 | P | P | P | P | 10.52905 |
| 6.983589 |          | 7.23852  | 7.8436   | P | P | P | P | 6.783724 |
| 10.61556 | 10.062   | 9.676102 | 9.425219 | P | P | P | P | 10.126   |
| 5.039048 | 4.796355 | 6.898775 | 5.681379 | A | M | P | P | 5.319209 |
| 7.785187 | 6.854737 | 7.547772 | 8.08248  | P | P | P | P | 8.440537 |
|          | 5.143532 |          |          | A |   |   |   |          |
| 6.297714 | 5.637373 |          | 2.403316 | A |   |   | M | 5.695628 |

|          |          |          |          |   |   |   |   |          |
|----------|----------|----------|----------|---|---|---|---|----------|
| 7.415117 | 6.034961 | 6.900406 | 7.663605 | A | P | P | P | 6.205552 |
| 6.751055 | 7.524672 | 6.442299 | 7.774289 | P | P | P | P | 7.726186 |
| 8.677175 | 9.286594 | 9.526412 | 9.515751 | P | P | P | P | 9.312145 |
| 7.896494 | 8.21687  | 8.507708 | 8.589787 | P | P | P | P | 7.827093 |
| 9.867099 | 9.663028 | 10.55616 | 11.25051 | P | P | P | P | 9.917063 |
| 8.244885 | 8.537034 | 8.267343 | 6.658608 | P | P | P | P | 8.166614 |
| 7.478155 | 6.488703 | 7.73966  | 9.194675 | P | P | P | P | 7.456632 |
| 7.174216 | 6.337353 | 6.930062 | 7.238009 | A | P | P | P | 6.125386 |
| 8.036673 | 7.027182 | 7.912059 | 9.357238 | P | P | P | P | 7.422951 |
| 10.1421  | 9.000515 | 8.529554 | 8.346242 | P | P | P | P | 9.836466 |
|          | 0.59728  |          |          | P |   |   |   |          |
| 8.190586 | 8.252216 | 7.786695 | 7.654598 | P | P | P | P | 7.76193  |
| 6.728798 | 7.588477 | 6.679819 | 5.854795 | P | P | P | P | 7.619516 |
| 7.131348 | 7.291629 | 6.790535 |          | P | M |   |   | 6.945367 |
|          |          |          | 4.259295 |   |   |   | P |          |
| 8.523397 | 8.766134 | 8.908614 | 9.551559 | P | P | P | P | 8.732101 |
| 11.87526 | 12.12198 | 11.48159 | 10.49546 | P | P | P | P | 11.52253 |
| 7.620125 | 7.51711  | 8.050398 | 8.318714 | P | P | P | P | 8.369012 |
| 7.945916 | 8.473589 | 8.406337 | 6.553457 | P | P | P | P | 8.294302 |
|          |          |          | 4.277696 |   |   |   | P |          |
|          |          | 7.391617 |          |   | M |   |   |          |
| 7.897069 | 7.328155 | 7.473949 | 7.692389 | P | P | P | P | 6.982902 |
| 8.728659 | 7.776884 | 7.480108 | 6.84142  | P | P | P | P | 7.809029 |
| 6.069925 | 5.78694  | 5.685428 | 4.684586 | A | P | P | P | 5.719215 |
| 6.994913 | 6.470935 |          | 7.377559 | A | M |   | P | 5.920741 |
| 9.597272 | 9.272762 | 10.44308 | 10.99979 | P | P | P | P | 9.370871 |
| 8.17698  | 7.512816 | 8.597462 | 8.960058 | A | A | P | P | 7.67668  |
| 13.44846 | 13.56803 | 11.99875 | 12.71111 | P | P | P | P | 13.89552 |
| 8.411774 | 8.031774 | 9.066674 | 8.718247 | P | P | P | P | 7.854899 |
| 12.79113 | 11.98366 | 13.31946 | 12.88664 | P | P | P | P | 11.47161 |
| 7.736475 | 7.757576 | 9.01228  | 9.942349 | P | P | P | P | 9.199028 |
|          | 5.342318 |          |          | A |   |   |   |          |
| 8.621364 | 8.172419 | 7.190249 | 6.804716 | P | P | P | P | 9.006086 |
| 7.510332 | 7.386075 | 5.92881  | 7.537509 | P | P | P | P | 8.506954 |
| 10.55899 | 10.23995 | 8.627846 | 8.539931 | P | P | P | P | 9.937154 |
| 9.49929  | 8.676522 | 7.679202 | 8.196336 | P | P | P | P | 8.359245 |
| 8.783087 | 8.307532 | 8.496453 | 10.17878 | P | P | P | P | 7.837298 |
| 7.38125  | 7.477582 | 6.524998 | 7.614978 | P | P | P | P | 8.463337 |
|          |          | 6.341198 |          |   | A |   |   |          |
| 8.23208  | 8.295112 | 9.127536 | 9.376784 | P | P | P | P | 8.245317 |

|          |          |          |          |   |   |   |          |
|----------|----------|----------|----------|---|---|---|----------|
| 10.90277 | 11.06343 | 9.733191 | 9.710329 | P | P | P | 11.30481 |
| 7.664404 | 6.583292 | 7.584673 | 7.775506 | P | P | P | 6.347659 |
| 10.82027 | 10.73902 | 11.44165 | 12.53659 | P | P | P | 10.69015 |
| 7.603235 |          | 7.031666 | 8.345774 |   | P | A | 6.659874 |
| 9.961553 | 9.388309 | 10.57723 | 10.02022 | P | P | P | 9.669024 |
| 10.3877  | 9.625464 | 10.37022 | 10.26102 | P | P | P | 9.381402 |
| 10.60278 | 11.46555 | 10.48421 | 9.811269 | P | P | P | 11.42562 |
| 6.864961 | 6.627868 | 5.662156 | 5.464143 | P | P | P | 6.642687 |
| 10.08411 | 10.00164 | 9.422972 | 8.801104 | P | P | P | 10.08043 |
| 5.535613 | 6.059209 | 6.261645 | P        | A | A |   | 5.8883   |
| 8.561949 | 8.351303 | 8.902793 | 8.711073 | P | P | P | 8.293194 |
| 8.295423 | 8.49718  | 9.390552 | 9.422863 | P | P | P | 10.10039 |
| 9.942562 | 10.0434  | 8.869651 | 10.12301 | P | P | P | 9.6536   |
| 7.535554 | 7.957013 | 6.618    | 6.045068 | P | P | P | 7.778885 |
| 8.55693  | 8.061821 | 8.557863 | 9.201478 | P | P | P | 8.676592 |
| 8.15308  | 8.632921 | 7.722318 | 8.565594 | P | P | P | 8.560882 |
| 8.985892 | 9.081812 | 10.13205 | 9.891904 | P | P | P | 8.930097 |
| 6.6423   | 7.313541 | 6.684574 | 7.469984 | P | P | P | 6.129387 |
| 9.590673 | 9.050453 | 9.936826 | 10.20937 | P | P | P | 8.04123  |
|          |          | 5.675241 | 5.929092 |   | P | P |          |
| 7.997489 | 7.810813 | 7.079221 | 6.129849 | P | P | P | 8.270064 |
| 8.624127 | 8.727124 | 10.0993  | 10.72915 | P | P | P | 8.912704 |
| 9.432525 | 9.355021 | 10.27275 | 10.34566 | P | P | P | 9.072541 |
|          |          |          | 6.611852 |   |   | A |          |
|          | 6.097977 |          | 6.645708 | A |   | A |          |
|          |          |          | 6.306155 |   |   | A |          |
| 7.503488 | 6.787983 | 7.830486 | 7.983779 | P | P | P | 7.636385 |
| 7.841517 | 8.449012 | 7.526535 | 6.90479  | P | P | P | 7.462588 |
| 7.674292 | 7.789242 | 8.549849 | 9.284478 | P | P | P | 7.325759 |
| 7.165807 |          | 9.020039 | 8.428269 |   | A | A | 7.885614 |
| 13.12081 | 11.46373 | 13.63561 | 14.28667 | P | P | P | 10.52833 |
| 9.025666 | 8.211937 | 10.00765 | 9.918318 | P | P | P | 8.72682  |
|          |          |          | 8.430234 |   |   | A |          |
|          | 3.314903 |          |          | P |   |   |          |
| 7.470313 | 7.12498  | 7.054461 | 6.692341 | P | P | P | 7.287547 |
| 8.270086 | 7.981624 | 7.285048 | 6.745995 | P | P | P | 8.03915  |
| 6.807646 | 7.006607 | 7.069193 | 7.946132 | A | P | A | 7.271704 |
| 10.52321 | 10.24707 | 11.28211 | 11.16269 | P | P | P | 10.13153 |
| 6.293685 |          | 6.743668 | A        |   | P |   | 5.004176 |
|          | 6.541567 | 5.597979 |          | M | P |   |          |

|          |          |          |          |   |   |   |          |
|----------|----------|----------|----------|---|---|---|----------|
| 6.461769 | 7.039794 | 6.644945 | 7.440254 | P | P | P | 6.109004 |
| 7.179567 | 5.679792 | 6.333592 | 6.650687 | P | P | P | 6.634258 |
| 9.416312 | 8.895072 | 9.215816 | 9.764737 | P | P | P | 9.044024 |
|          | 6.368375 | 6.536061 |          | M | P |   |          |
| 8.668227 | 8.480499 | 9.098598 | 8.415099 | P | P | P | 7.876191 |
| 5.959165 | 7.085555 | 6.620028 | A        | P | A |   | 4.481537 |
| 5.342684 |          |          | A        |   |   |   | 3.412587 |
| 10.41934 | 9.362397 | 10.26336 | 10.14199 | P | P | P | 9.34029  |
| 9.270306 | 8.686696 | 8.418321 | 7.013603 | P | P | P | 8.223738 |
| 9.307862 | 8.773952 | 9.259074 | 9.238504 | P | P | P | 9.207249 |
| 10.51174 | 10.00067 | 9.301648 | 9.968921 | P | P | P | 9.855928 |
|          |          | 3.203446 |          |   | P |   |          |
|          |          |          | 3.906163 |   |   | P |          |
| 7.134449 | 7.437162 | 8.560764 | 8.432836 | P | P | A | 6.315671 |
| 10.05227 | 9.702852 | 8.787447 | 8.008145 | P | P | P | 9.632134 |
| 9.108763 | 9.011574 | 9.610834 | 9.363699 | P | P | P | 8.781466 |
| 8.020237 | 7.510314 | 9.025805 | 7.880117 | A | A | P | 7.991768 |
| 8.206307 | 7.631327 | 9.522256 | 9.300068 | P | P | P | 7.943509 |
| 9.416837 | 9.277255 | 8.798359 | 8.213305 | P | P | P | 9.06043  |
|          | 5.485292 | 5.696586 | 6.355386 | P | P | P |          |
| 10.77697 | 11.48284 | 9.864147 | 10.70598 | P | P | P | 12.19981 |
| 9.954654 | 9.57006  | 9.199954 | 8.309993 | P | P | P | 9.871    |
| 12.55729 | 12.82624 | 13.12993 | 14.14928 | P | P | P | 13.16047 |
| 10.44192 | 10.20412 | 10.79213 | 10.18717 | P | P | P | 9.543549 |
| 6.48158  | 7.465409 | 6.268477 | 8.066978 | M | P | P | 7.074074 |
| 7.278909 | 6.501186 | 7.516194 | 8.772032 | P | M | P | 8.044706 |
| 5.61729  | 6.779179 | 6.507238 | P        | P | P |   | 6.050255 |
| 6.795954 | 6.32514  | 7.154868 | 8.237555 | P | A | A | 6.480076 |
| 10.76872 | 10.78082 | 9.604264 | 9.569938 | P | P | P | 10.72149 |
| 11.12692 | 10.87782 | 10.32031 | 9.872557 | P | P | P | 11.39568 |
| 8.359942 | 8.368293 | 9.911861 | 9.715398 | P | P | P | 8.463409 |
| 6.177295 |          | 6.575879 | 7.007633 |   | P | A | 5.395027 |
| 7.175545 | 6.597209 | 6.87604  | 6.683582 | P | P | M | 5.523325 |
| 7.143701 | 7.653481 | 6.775763 | 6.993122 | P | P | P | 6.096923 |
| 9.74677  | 8.08626  | 10.34533 | 9.913333 | P | P | P | 7.78789  |
| 4.878707 | 4.877493 | 5.819958 | 4.981682 | A | P | P | 1.328616 |
| 10.15867 | 10.42445 | 9.914742 | 9.147741 | P | P | P | 10.07864 |
| 8.756067 | 7.858578 | 8.819944 | 9.018384 | P | P | P | 8.753518 |
| 7.91918  | 7.61275  | 9.127579 | 7.990599 | P | P | P | 7.212935 |
| 9.200505 | 9.347474 | 8.25577  | 8.498947 | P | P | P | 8.150263 |

|          |          |          |            |   |   |   |          |
|----------|----------|----------|------------|---|---|---|----------|
| 5.18909  | 7.30297  | 7.287954 | P          | P | P |   | 6.551914 |
| 10.38378 | 10.37214 | 11.12132 | 10.89421 P | P | P | P | 10.08319 |
| 8.862487 | 8.377887 | 7.131014 | 6.95688 P  | P | P | P | 8.072941 |
| 5.863174 | 6.430842 | 4.884632 | A          | P | P |   | 5.110523 |
|          | 6.748588 |          | 6.137581   | A |   | P |          |
| 6.482169 | 6.000013 | 6.140191 | 6.837679 P | P | P | A | 6.267564 |
| 5.303323 |          | 6.93681  | P          |   | A |   | 6.8035   |
|          |          | 6.978841 |            |   | A |   |          |
| 8.450208 | 7.800365 | 7.907608 | 7.603059 P | P | P | P | 8.734529 |
| 6.545521 | 5.015319 | 7.439499 | 7.978933 P | P | P | M | 6.856481 |
| 11.4736  | 9.622763 | 12.99759 | 13.14534 P | P | P | P | 10.56053 |
| 12.13391 | 11.7426  | 12.63958 | 12.72498 P | P | P | P | 11.79138 |
| 5.893291 | 5.543881 | 6.057696 | P          | P | A |   | 6.119388 |
|          | 5.626555 |          |            | A |   |   |          |
| 12.53684 | 11.51417 | 13.84308 | 13.86484 P | P | P | P | 11.69175 |
| 7.886099 | 7.804215 | 7.903876 | 9.172426 P | P | P | P | 7.884626 |
| 7.134705 | 6.465394 | 7.485719 | 6.633137 P | P | P | P | 6.63733  |
|          | 6.321722 |          | 5.777472   | A |   | P |          |
| 8.622902 | 8.767738 | 9.45439  | 10.18871 P | P | P | P | 8.697914 |
| 7.654578 | 8.010023 | 7.109576 | 7.553373 M | P | P | P | 6.851567 |
| 7.857621 | 8.567643 | 8.318517 | 8.153167 P | P | P | P | 9.144463 |
| 8.332999 | 8.622447 | 9.367867 | 9.692424 P | P | P | P | 9.143548 |
| 1.538853 | 4.672904 |          | P          | P |   |   | 5.110081 |
| 4.481123 | 5.471584 |          | P          | P |   |   | 6.331172 |
| 7.325913 | 6.866762 | 6.996112 | A          | M | P |   | 7.2854   |
| 4.271589 | 5.95748  |          | M          | P |   |   | 6.180886 |
|          |          | 9.79115  |            |   |   | A |          |
| 5.712415 | 5.796804 | 6.209797 | A          | P | P |   | 5.15563  |
| 10.73566 | 7.885145 | 11.85406 | 12.88783 P | P | P | P | 8.357907 |
| 11.23622 | 10.62178 | 10.45681 | 11.06357 P | P | P | P | 10.89363 |
| 8.021687 | 8.462216 | 8.033616 | 7.590123 P | P | P | P | 8.010718 |
|          | 4.924745 | 3.200086 |            | P | P |   |          |
| 7.461963 | 6.577962 | 7.763663 | 8.505414 P | M | P | P | 8.044572 |
|          |          | 6.610405 | 7.086035   |   | M | A |          |
| 10.24021 | 10.08181 | 10.9535  | 11.28853 P | P | P | P | 10.14835 |
|          | 5.729815 |          |            | A |   |   |          |
| 6.398449 | 6.142793 | 6.378481 | 7.169382 P | P | A | P | 6.426474 |
|          |          | 1.865063 | 6.885155   |   | M | A |          |
| 6.647037 | 5.628358 | 6.79453  | A          | P | A |   | 6.257468 |
| 6.447878 | 6.132288 |          | A          | A |   |   | 5.727063 |

|          |          |          |            |   |   |   |          |
|----------|----------|----------|------------|---|---|---|----------|
|          |          | 4.046625 |            |   | P |   |          |
| 4.506592 | 4.770907 |          | 7.436051 P | P |   | P | 5.871411 |
|          |          |          | 6.767195   |   |   | A |          |
| 7.275435 | 6.113899 | 8.355689 | 8.812593 P | P | P | P | 9.076408 |
| 5.162138 | 5.038777 |          | 6.571743 A | P |   | A | 6.207047 |
|          |          |          | 2.595488   |   |   | M |          |
| 9.38184  | 9.24615  | 9.591276 | 9.863566 P | P | P | P | 9.499854 |
| 6.301622 | 6.377987 | 6.742495 | 6.652017 P | P | P | P | 6.805685 |
| 8.420012 | 7.765198 | 9.21949  | 8.25483 P  | P | P | P | 8.223791 |
| 9.519559 | 9.395605 | 8.792555 | 8.384859 P | P | P | P | 9.790401 |
| 8.267861 | 8.346574 | 7.550932 | 9.387808 P | P | P | P | 8.682734 |
| 5.133658 |          | 5.799232 | 4.49593 M  |   | A | M | 5.469122 |
|          |          | 6.771675 |            |   | A |   |          |
| 12.18005 | 12.21967 | 11.39406 | 10.65043 P | P | P | P | 11.86219 |
| 8.415374 | 8.385226 | 7.704614 | 7.749392 P | P | P | P | 7.855209 |
| 5.789934 | 5.849722 | 6.777937 | 7.829706 P | P | P | A | 7.330984 |
| 7.035768 | 7.395576 | 8.691944 | 8.304378 P | P | P | P | 8.777613 |
| 6.627246 | 5.738603 | 6.405737 | 7.756597 A | A | P | P | 6.889478 |
|          |          | 6.409565 |            |   | A |   |          |
| 8.940533 | 9.935191 | 8.601665 | 8.276467 P | P | P | P | 9.528745 |
| 11.49925 | 10.40007 | 10.92959 | 9.918645 P | P | P | P | 9.807349 |
|          |          | 4.505244 |            |   | P |   |          |
| 7.648592 | 8.242678 | 6.96433  | 4.525071 P | P | P | P | 7.491643 |
| 5.615936 |          |          | 6.900399 A |   |   | A | 3.719434 |
| 5.939812 | 5.453758 | 7.098844 | 5.97026 A  | A | P | P | 6.475416 |
| 6.196949 |          | 6.870289 | A          |   | A |   | 6.214257 |
| 6.381312 |          |          | A          |   |   |   | 3.76012  |
|          | 6.904299 |          | 7.90691    | A |   | A |          |
| 7.767657 | 7.009668 | 7.342022 | A          | P | M |   | 7.296306 |
| 5.184117 | 5.320884 | 5.483513 | 6.135731 P | A | P | P | 5.767296 |
| 7.411352 | 6.046921 | 8.410072 | 7.930193 A | P | A | A | 6.798926 |
| 5.320863 |          |          | 6.58624 A  |   |   | A | 5.235628 |
|          |          |          | 6.01174    |   |   | M |          |
| 7.899288 | 7.590881 | 8.517968 | 8.838697 P | P | P | A | 7.73466  |
| 9.694706 | 8.640718 | 10.04078 | 10.16923 P | P | P | P | 8.906375 |
| 8.42219  | 9.811313 | 9.586479 | 9.68951 P  | P | P | P | 9.676586 |
| 4.836542 |          | 6.289159 | A          |   | A |   | 4.301296 |
|          | 5.864404 | 7.259947 |            | P | A |   |          |
|          | 4.670628 |          |            | A |   |   |          |
| 6.839357 | 4.170275 | 6.631331 | 6.149556 P | P | P | P | 7.171057 |

|          |          |          |            |   |   |   |          |
|----------|----------|----------|------------|---|---|---|----------|
| 5.495146 |          | 6.240867 | 6.407797 A |   | P | P | 3.449108 |
|          | 8.670166 |          | 7.825978   | P |   | P |          |
| 9.336505 | 8.872589 | 8.31336  | 8.193691 P | P | P | P | 9.511998 |
| 5.830278 | 4.639022 | 4.017846 | 5.256591 P | P | P | M | 6.395938 |
| 10.39971 | 11.00983 | 9.851515 | 10.0885 P  | P | P | P | 10.88915 |
|          | 5.001926 |          |            | A |   |   |          |
| 5.694796 |          |          | 7.276781 P |   |   | P | 5.406096 |
| 12.16291 | 12.53627 | 11.02144 | 11.6611 P  | P | P | P | 13.02432 |
| 13.17314 | 12.86934 | 13.36707 | 14.88247 P | P | P | P | 13.75348 |
| 7.911765 | 7.422412 | 7.572662 | 7.197945 P | P | P | P | 8.1875   |
| 10.01191 | 8.100019 | 8.254776 | 8.158717 P | P | P | P | 8.44104  |
| 6.465441 |          |          | 6.552071 A |   |   | M | 5.296823 |
| 9.400358 | 8.356627 | 9.178479 | 9.251212 P | P | P | P | 8.177736 |
| 6.153494 | 5.453228 |          | A          | M |   |   | 3.679702 |
| 9.903981 | 9.007316 | 10.63769 | 9.918663 P | P | P | P | 8.72107  |
| 5.625572 | 4.689588 |          | 5.787693 P | P |   | P | 6.424517 |
| 6.422546 | 6.571432 | 5.821301 | 7.021446 P | P | P | P | 6.268101 |
| 8.447392 | 7.834119 | 8.446475 | 8.218699 P | P | P | P | 7.386992 |
| 8.261425 | 8.442455 | 7.734204 | 7.387938 P | P | P | P | 8.541575 |
| 6.917625 | 6.993346 | 5.554376 | 6.223309 M | P | P | A | 5.792301 |
|          |          |          | 3.645457   |   |   | P |          |
| 7.919143 | 7.536616 | 8.551348 | 9.067685 P | P | A | P | 8.282099 |
| 10.55134 | 10.47434 | 11.62939 | 11.82626 P | P | P | P | 10.91843 |
| 4.650441 |          |          | 6.932035 P |   |   | M | 5.837523 |
|          |          | 5.452    | 6.132424   |   | A | A |          |
| 4.508447 | 4.745326 | 5.056941 | P          | P | P |   | 5.099388 |
| 7.572363 | 8.293615 | 7.330989 | 7.63667 P  | P | P | P | 7.437326 |
| 9.510028 | 9.018109 | 8.260316 | 7.666091 P | P | P | P | 9.223265 |
| 5.563319 |          |          | A          |   |   |   | 4.551669 |
| 8.91807  | 8.457339 | 8.422973 | 7.89983 P  | P | P | P | 8.134952 |
| 8.436136 | 8.682852 | 8.824612 | 8.435607 P | P | P | P | 8.220616 |
|          | 6.25417  | 5.883596 |            | P | P |   |          |
|          | 5.687244 |          | 7.75618    | M |   | A |          |
| 10.24902 | 9.855196 | 9.469278 | 9.346142 P | P | P | P | 9.239401 |
| 7.202741 | 7.965251 | 4.691031 | 4.037224 P | P | P | P | 7.414629 |
| 6.460213 | 6.556069 | 7.511208 | 7.120545 P | P | P | P | 6.689648 |
|          | 6.632553 |          | 7.458122   | P |   | A |          |
|          |          |          | 2.795264   |   |   | P |          |
| 5.971767 | 5.5883   |          | A          | A |   |   | 4.880454 |
| 2.464275 |          |          | P          |   |   |   | 6.171084 |

|          |          |          |            |   |   |   |          |
|----------|----------|----------|------------|---|---|---|----------|
|          | 6.798854 |          |            | A |   |   |          |
| 6.123521 |          | 5.932509 | A          |   | P |   | 4.949897 |
|          | 6.013292 |          |            | A |   |   |          |
|          | 3.140983 |          |            | M |   |   |          |
|          |          |          | 7.251032   |   |   | A |          |
| 4.601379 |          | 5.747814 | P          |   | P |   | 5.891196 |
| 9.476879 | 10.13664 | 8.870139 | 8.016568 P | P | P | P | 9.375067 |
|          |          | 5.369545 |            |   | A |   |          |
| 7.79599  | 6.774172 | 8.313059 | 8.509563 P | P | P | P | 8.00346  |
|          | 6.676733 |          |            | A |   |   |          |
| 7.611862 | 6.797597 | 5.755651 | 6.656489 A | P | P | P | 4.721762 |
| 6.640108 | 7.019827 | 5.919436 | 6.33171 P  | P | P | P | 6.346196 |
| 7.398607 | 6.594202 | 6.973475 | 3.725941 P | P | P | P | 7.03953  |
| 9.760389 | 9.885973 | 9.392636 | 8.662164 P | P | P | P | 10.09901 |
| 7.846317 | 7.85409  | 8.585849 | 8.389851 M | P | A | P | 8.166794 |
| 9.615934 | 9.392288 | 9.936227 | 11.06826 P | P | P | P | 9.946093 |
|          |          |          | 6.959546   |   |   | A |          |
| 7.112263 | 6.530445 | 6.597064 | 7.330433 A | P | P | P | 6.503163 |
| 7.349039 | 6.700314 | 7.132297 | 6.730583 P | P | P | P | 6.335817 |
| 6.023877 | 6.742839 | 5.335678 | 6.215303 P | P | P | P | 5.811284 |
|          | 5.236632 |          |            | A |   |   |          |
| 9.029537 | 8.728809 | 9.792689 | 9.057559 P | P | P | P | 8.46046  |
|          |          | 6.8359   | 3.108594   |   | P | M |          |
| 6.664949 | 6.842649 | 6.485465 | 4.411047 P | P | P | P | 6.220972 |
| 6.200685 |          | 5.848281 | A          |   | P |   | 6.284221 |
| 7.854625 | 7.291251 | 8.992935 | 8.006169 P | P | P | P | 6.432444 |
| 0.706387 |          |          | P          |   |   |   | 5.106386 |
| 0.843783 | 5.292211 |          | P          | A |   |   | 5.836345 |
| 7.841997 | 7.388207 | 6.636967 | 6.18369 P  | P | P | P | 7.202283 |
| 6.70345  | 5.306861 | 6.354958 | 6.192783 A | P | P | P | 5.211603 |
| 9.585595 | 9.549686 | 10.13375 | 10.36121 P | P | P | P | 9.740285 |
| 9.461623 | 9.808733 | 10.66654 | 10.86241 P | P | P | P | 9.917001 |
|          | 4.411634 | 4.243219 |            | P | P |   |          |
| 5.793177 | 5.077372 | 5.108475 | P          | P | P |   | 4.870319 |
|          | 6.047112 | 5.461042 |            | A | A |   |          |
| 7.133229 | 6.013986 | 7.804874 | 7.941126 P | P | P | A | 7.581558 |
|          |          | 6.473007 |            |   | A |   |          |
| 6.776156 | 7.136894 | 7.493483 | 7.245543 P | P | P | P | 7.85927  |
| 5.58456  |          |          | P          |   |   |   | 6.746651 |
| 5.603334 | 5.697962 |          | A          | P |   |   | 2.855138 |



|          |          |          |            |   |   |   |          |
|----------|----------|----------|------------|---|---|---|----------|
|          |          |          | 0.789794   |   |   | P |          |
| 8.276857 | 8.50996  | 6.976972 | 6.37227 P  | P | P | P | 7.738538 |
| 7.336333 | 6.95646  | 7.967358 | 7.128278 P | A | P | P | 6.459954 |
| 11.65672 | 11.32934 | 12.01346 | 10.86482 P | P | P | P | 11.73681 |
| 8.294422 | 6.814115 | 6.584814 | 7.186482 P | P | P | P | 8.443007 |
|          |          |          | 6.681667   |   |   | A |          |
| 6.195625 | 5.746071 | 3.612431 | A          | P | P |   | 2.909117 |
|          | 4.588473 |          | 2.984918   | M |   | P |          |
| 7.195657 | 7.446679 | 6.881333 | 6.475665 P | P | P | P | 7.136348 |
| 11.15779 | 10.68808 | 9.55184  | 9.315225 P | P | P | P | 10.37432 |
| 4.424379 | 5.526741 | 5.595044 | 4.978666 P | P | P | P | 5.729401 |
| 9.015821 | 8.754318 | 7.860175 | 7.732516 P | P | P | P | 9.067462 |
| 7.008287 | 6.448291 | 5.516421 | 6.598819 P | P | P | M | 6.367252 |
|          | 6.357967 |          | 5.556402   | P |   | P |          |
| 6.182849 | 5.538989 |          | A          | P |   |   | 3.887596 |
| 10.04952 | 10.33883 | 9.693961 | 8.540963 P | P | P | P | 10.217   |
| 10.43661 | 10.52766 | 9.645368 | 9.175632 P | P | P | P | 9.827598 |
| 7.191608 | 7.96289  | 7.332309 | 3.63254 P  | P | P | P | 7.720788 |
| 3.011156 |          |          | P          |   |   |   | 6.245928 |
|          | 6.027628 | 5.650091 |            | P | A |   |          |
| 12.48994 | 12.3057  | 11.98572 | 11.43065 P | P | P | P | 12.16359 |
| 9.171095 | 8.719006 | 9.798484 | 10.24238 P | P | P | P | 9.525815 |
| 8.422285 | 8.709685 | 8.178281 | 7.528044 P | P | P | P | 8.636051 |
| 9.557851 | 8.748524 | 9.504396 | 9.126778 P | P | P | P | 8.538255 |
| 6.101026 | 6.483866 | 6.092931 | 5.309302 P | P | P | P | 5.850773 |
| 6.40233  | 6.699948 | 6.739069 | 7.103727 P | P | P | M | 6.761206 |
| 7.770804 | 7.891881 | 6.217196 | 6.854411 P | P | P | P | 7.456305 |
|          |          | 2.239048 |            |   | P |   |          |
| 6.814743 | 6.200938 |          | 6.020954 A | A |   | P | 5.58211  |
| 6.422943 | 5.288216 | 6.273224 | A          | M | P |   | 4.577247 |
| 7.57525  | 7.858206 | 7.50354  | 6.302399 P | P | P | P | 7.631892 |
| 9.036638 | 9.746462 | 9.494371 | 8.899904 P | P | P | P | 9.546414 |
| 12.15436 | 12.52116 | 11.69473 | 11.43354 P | P | P | P | 12.34216 |
| 7.543549 | 8.300723 | 9.274475 | 9.165092 P | P | P | A | 7.219393 |
| 9.318177 | 9.388127 | 9.810226 | 8.65132 P  | P | P | P | 8.922133 |
| 0.344839 |          | 5.331335 | 2.100278 P |   | P | P | 6.467106 |
| 4.565839 | 4.829703 | 6.325392 | M          | A | A |   | 6.091045 |
| 7.266331 | 6.480189 | 7.130177 | 7.700778 P | P | P | P | 7.077518 |
| 7.656892 | 8.124627 | 8.247639 | 8.388383 P | P | P | P | 7.432279 |
|          |          | 7.158512 |            |   | A |   |          |

|          |          |          |          |   |   |   |          |
|----------|----------|----------|----------|---|---|---|----------|
| 8.816929 | 8.478102 | 9.698216 | 9.738    | P | P | P | 8.433575 |
| 12.64242 | 12.78191 | 11.52272 | 11.48041 | P | P | P | 12.92399 |
| 9.356259 | 9.28581  | 8.703244 | 7.240465 | P | P | P | 9.216883 |
| 8.237056 | 9.37386  | 9.053207 | 7.153808 | P | P | P | 8.073648 |
| 12.05635 | 11.946   | 11.54151 | 11.01174 | P | P | P | 12.19514 |
| 9.304999 | 9.33138  | 10.15057 | 10.28423 | P | P | P | 8.703123 |
| 5.69368  |          |          | 4.081749 |   |   | M | 5.650649 |
| 10.96131 | 10.38928 | 11.77484 | 12.03852 | P | P | P | 10.12856 |
| 11.10049 | 10.88219 | 10.01009 | 9.501296 | P | P | P | 10.71531 |
| 9.17362  | 8.970646 | 9.473918 | 8.851046 | P | P | P | 8.853909 |
| 5.503316 |          |          | A        |   |   |   | 2.876214 |
|          |          |          | 7.1472   |   |   | A |          |
| 5.8626   | 6.120047 | 6.5152   | 6.102689 | A | P | P | 6.307462 |
| 9.13108  | 9.02935  | 10.9172  | 10.96732 | P | P | P | 9.190622 |
| 13.84222 | 14.21209 | 13.42131 | 12.76992 | P | P | P | 14.19305 |
| 7.304903 | 7.139272 | 6.586402 | A        | P | P |   | 7.22871  |
|          | 4.278166 | 5.937707 |          | P | A |   |          |
| 9.264226 | 9.75102  | 10.35018 | 10.1297  | P | P | P | 9.488923 |
| 7.382754 | 7.190185 | 6.500726 | 6.208083 | P | P | P | 7.089505 |
|          | 3.225896 |          |          | P |   |   |          |
| 11.55256 | 11.04575 | 11.86185 | 12.3518  | P | P | P | 11.16461 |
| 6.911445 | 6.60433  | 7.150555 | 6.879486 | P | A | P | 6.929777 |
|          |          | 7.8058   |          |   | A |   |          |
| 8.074462 |          | 7.080949 | A        |   | P |   | 6.755153 |
| 11.62161 | 11.42003 | 10.79912 | 10.80271 | P | P | P | 11.01875 |
| 9.30876  | 8.976118 | 8.772841 | 8.68783  | P | P | P | 9.319034 |
| 8.387524 | 8.494221 | 7.67686  | 7.500164 | P | P | P | 8.584781 |
| 9.390542 | 8.917178 | 8.132386 | 7.851721 | P | P | P | 8.698761 |
| 6.688082 | 7.42392  | 5.936665 | 5.976173 | P | P | P | 7.337382 |
| 9.386135 | 8.344528 | 8.901412 | 9.145902 | P | P | P | 8.305923 |
| 10.75058 | 9.526753 | 10.26421 | 9.316285 | P | P | P | 9.223499 |
| 8.536917 | 7.604118 | 8.158621 | 7.544895 | P | P | P | 8.702137 |
| 6.753722 | 6.36359  | 6.745418 | 4.105214 | A | P | P | 6.647064 |
| 9.230427 | 9.609077 | 10.04411 | 11.71033 | P | P | P | 10.39732 |
| 5.190854 | 6.081651 | 6.214079 | P        | M | A |   | 6.830638 |
| 10.98523 | 8.889336 | 12.23872 | 11.7596  | P | P | P | 8.492681 |
|          |          | 2.935905 |          |   | M |   |          |
| 8.820531 | 7.814405 | 7.133613 | 7.817579 | P | P | P | 8.530455 |
| 6.544739 |          | 6.332213 | P        |   | P |   | 5.171784 |
| 7.563731 | 6.908113 | 7.858582 | 7.131892 | P | P | P | 5.884646 |

|          |          |          |          |   |   |   |          |
|----------|----------|----------|----------|---|---|---|----------|
| 8.622107 | 8.625644 | 7.366205 | 5.866308 | P | P | P | 8.077145 |
| 5.657073 | 0.062429 | 1.048707 | 6.421429 | P | P | P | 5.87106  |
| 9.613988 | 9.820425 | 8.846838 | 8.068011 | P | P | P | 9.422885 |
| 12.24944 | 12.64058 | 11.58815 | 11.43668 | P | P | P | 12.58392 |
|          |          | 5.143171 |          |   | M |   |          |
| 6.510405 | 7.091079 | 7.09302  | 6.883248 | A | P | M | 3.744278 |
| 5.736445 | 6.421923 | 6.196668 | 5.24249  | A | A | M | 6.193121 |
|          | 5.806459 |          |          | P |   |   |          |
| 7.693633 | 7.670276 | 8.671958 | 8.527575 | P | P | P | 7.772745 |
| 12.11336 | 11.45013 | 12.90169 | 12.69809 | P | P | P | 11.55095 |
| 10.19215 | 9.831405 | 10.33467 | 10.53895 | P | P | P | 9.862337 |
| 9.087256 | 8.384207 | 9.60638  | 9.72242  | M | M | P | 8.430425 |
| 7.299068 | 7.520691 | 6.616406 | 6.041478 | P | P | P | 6.906225 |
| 8.736154 | 9.088864 | 8.128248 | 8.515109 | P | P | P | 9.348325 |
| 10.49572 | 11.66314 | 10.83267 | 9.889497 | P | P | P | 10.29683 |
| 5.117234 | 4.810786 | 3.247498 | 7.166796 | P | P | A | 5.501198 |
| 6.278181 | 7.040268 | 5.620902 | 5.974572 | P | P | P | 6.907293 |
| 8.486409 | 7.33621  | 9.352323 | 9.268425 | P | P | P | 7.390732 |
| 8.878994 | 8.354705 | 7.526385 | 7.08628  | P | P | P | 8.035567 |
| 7.046268 | 6.808995 | 5.122205 | 3.940802 | P | P | P | 7.093213 |
| 7.524002 | 7.628718 | 7.789537 | 7.550988 | P | P | P | 7.109773 |
| 8.232636 | 8.390009 | 7.954537 | 6.747297 | P | P | P | 8.087181 |
|          |          | 6.210664 | 3.817936 |   | P | P |          |
| 6.904029 | 7.081052 | 8.627751 | 7.754617 | M | P | P | 6.858336 |
| 8.300799 | 6.839218 | 7.729566 | 8.671825 | P | P | P | 7.037876 |
| 7.834615 | 7.783504 | 6.673648 | 7.880296 | P | P | P | 7.730599 |
| 8.116107 | 6.747825 | 5.332208 | 6.172121 | P | P | P | 5.145216 |
| 8.174051 | 8.183741 | 7.7615   | 7.273005 | P | P | P | 7.954009 |
| 11.49069 | 11.06619 | 11.61698 | 11.17585 | P | P | P | 10.46901 |
| 10.2976  | 9.516995 | 9.804576 | 10.81359 | P | P | P | 8.391036 |
| 7.228399 | 7.837491 | 6.154816 | 6.393863 | P | P | P | 7.077817 |
| 8.843374 | 8.276321 | 9.877244 | 9.260672 | P | P | P | 8.471471 |
| 6.968983 | 7.484144 | 7.107785 | 8.502869 | M | P | P | 8.121149 |
| 9.034618 | 9.022247 | 8.071956 | 7.952307 | P | P | P | 8.897077 |
| 6.418488 | 8.51085  | 3.233211 | 4.346761 | P | P | P | 7.50681  |
| 11.00752 | 11.08959 | 10.53881 | 9.546826 | P | P | P | 10.90808 |
|          |          | 5.238175 |          |   |   | M |          |
| 11.52371 | 11.66662 | 11.2125  | 10.58249 | P | P | P | 11.51084 |
| 7.598008 | 7.753438 | 6.938052 | 6.426436 | P | P | M | 7.200509 |
| 5.21406  | 4.588656 |          | 6.655618 | M |   | P | 4.789914 |

|          |          |          |            |   |   |   |          |
|----------|----------|----------|------------|---|---|---|----------|
|          | 5.551699 | 6.565776 | 5.556164   | P | P | P |          |
| 7.044312 | 5.322752 | 6.582272 | 7.453761 P | P | A | P | 6.524096 |
| 10.77364 | 10.78887 | 9.924688 | 9.864787 P | P | P | P | 10.82416 |
| 13.64667 | 14.05064 | 13.06799 | 12.38187 P | P | P | P | 13.86208 |
|          | 5.56298  | 1.156111 |            | A | P |   |          |
| 11.55081 | 12.293   | 11.42268 | 11.76806 P | P | P | P | 12.50074 |
|          | 5.091164 |          |            | P |   |   |          |
| 6.953349 | 7.048197 | 7.038072 | P          | A | P |   | 7.1318   |
| 9.363145 | 8.873607 | 8.254705 | 8.946159 P | P | P | P | 8.32828  |
|          | 6.272815 | 5.485419 |            | P | P |   |          |
| 7.256207 | 5.817608 | 6.47998  | 6.918552 P | P | P | P | 5.826437 |
| 7.345845 | 8.604585 | 7.796466 | 7.501929 P | P | P | P | 7.818111 |
| 6.059507 |          |          | 5.649723 A |   |   | P | 3.403753 |
| 7.27335  | 6.188051 | 6.628601 | 7.320282 A | P | P | A | 6.538691 |
| 7.250902 | 6.532396 | 8.045852 | 8.249164 P | P | P | P | 6.998648 |
| 7.4848   | 6.668388 | 8.363228 | 8.377489 P | P | P | P | 6.372687 |
|          | 5.967802 | 6.169637 |            | P | A |   |          |
| 6.63892  | 7.624964 | 7.777444 | 7.886976 P | P | P | P | 7.772521 |
|          | 6.451079 | 3.506951 |            | A | P |   |          |
| 6.97831  | 7.928034 | 6.672229 | 6.938639 P | P | P | P | 6.85902  |
|          | 5.091476 |          | 6.71678    | A |   | A |          |
| 8.779937 | 8.351264 | 9.370849 | 9.611438 A | A | A | A | 8.699714 |
| 8.951821 | 8.530178 | 7.770418 | 7.96427 P  | P | P | P | 8.796924 |
| 6.184133 | 5.729307 | 4.19403  | 5.332149 P | P | P | P | 6.807295 |
| 8.549597 | 7.022159 | 8.16882  | 8.09761 P  | P | P | P | 8.086581 |
| 5.761094 | 5.882394 | 8.069969 | 7.292163 A | P | P | M | 5.575129 |
|          | 5.204717 |          |            | A |   |   |          |
| 12.29379 | 12.80539 | 11.1194  | 10.72119 P | P | P | P | 12.76461 |
| 7.222316 | 8.160075 | 7.020441 | 6.161135 P | P | P | P | 7.964045 |
|          | 6.223685 |          |            | A |   |   |          |
| 9.762412 | 8.65376  | 8.732389 | 8.705602 P | P | P | P | 8.192568 |
|          | 5.94354  |          |            | M |   |   |          |
| 12.89263 | 13.05476 | 12.28332 | 12.17803 P | P | P | P | 13.49749 |
| 7.758499 | 7.204067 | 6.369926 | A          | P | P |   | 7.327783 |
| 11.40016 | 11.23861 | 10.66036 | 10.36593 P | P | P | P | 11.10507 |
| 8.62066  | 8.142527 | 9.750282 | 9.253884 P | P | P | P | 7.990555 |
|          |          |          | 7.019892   |   |   | A |          |
| 6.347315 | 4.957642 | 5.931943 | A          | P | A |   | 6.50398  |
| 8.848777 | 9.145901 | 8.04645  | 5.342483 P | P | P | P | 8.170148 |
| 5.964276 | 5.246984 | 7.688293 | 8.452553 P | P | P | P | 6.96581  |

|          |          |          |          |   |   |   |          |
|----------|----------|----------|----------|---|---|---|----------|
| 7.451847 | 7.506459 | 5.966744 | 7.083751 | P | P | P | 7.468264 |
|          |          | 7.413107 |          |   | A |   |          |
| 8.417349 | 7.585015 | 8.852887 | 9.458536 | A | P | M | 7.907753 |
|          |          | 7.085129 | 7.08328  |   | A | M |          |
| 9.638142 | 9.318477 | 9.769465 | 8.874169 | P | P | P | 8.697082 |
| 9.590361 | 9.043144 | 10.14471 | 10.15104 | P | P | P | 8.67196  |
| 7.273054 | 6.864873 | 8.864687 | 8.580791 | A | A | A | 5.901448 |
| 9.156948 | 8.791711 | 7.955402 | 7.24757  | P | P | P | 8.144494 |
|          | 4.74395  | 4.777851 | 6.094303 | P | M | P |          |
| 9.092741 | 8.867346 | 10.72308 | 11.83172 | P | P | P | 10.05016 |
|          |          | 5.761819 | 6.252342 |   | M | P |          |
| 8.214297 | 7.554721 | 8.056453 | 8.108669 | A | P | P | 6.839331 |
| 9.503206 | 8.874476 | 8.04957  | 8.547753 | P | P | P | 9.59555  |
| 8.485696 | 7.844417 | 8.196227 | 8.161686 | P | P | P | 7.458348 |
| 10.53959 | 10.19735 | 9.935767 | 9.207717 | P | P | P | 10.00119 |
| 9.105834 | 9.543515 | 9.455806 | 7.644549 | P | P | P | 9.713735 |
|          |          | 6.860206 |          |   | P |   |          |
|          | 5.474599 |          | 3.963913 | P |   | P |          |
| 10.2168  | 9.621515 | 10.07844 | 9.404184 | P | P | P | 9.136371 |
| 4.868782 | 4.488644 |          | A        | M |   |   | 3.152376 |
| 9.99654  | 9.041196 | 8.833877 | 10.2276  | P | P | P | 8.605565 |
| 7.771529 | 7.466737 | 8.455421 | 8.587034 | P | P | P | 7.504085 |
| 8.266203 | 8.222699 | 9.579347 | 9.046031 | P | P | P | 8.672675 |
| 6.282198 | 5.053372 | 7.547012 | 8.171384 | P | P | P | 6.602729 |
| 6.401078 | 5.870277 | 7.122066 | 6.959861 | A | M | A | 5.97005  |
|          |          | 7.286524 | 7.992874 |   | A | A |          |
| 8.402193 | 8.047944 | 8.656142 | 9.038126 | P | P | P | 8.597212 |
| 10.02076 | 10.02242 | 9.385133 | 9.116158 | P | P | P | 9.77211  |
| 6.182449 | 5.327623 | 6.453509 | A        | P | P |   | 6.049049 |
| 7.91499  | 5.660677 | 7.148578 | 7.396401 | A | A | A | 4.203769 |
|          | 4.115966 | 5.389576 | 6.539122 | P | P | A |          |
|          |          | 5.975898 |          |   | A |   |          |
|          | 5.552527 | 5.328544 |          | A | P |   |          |
| 7.135922 | 6.965217 | 8.06734  | P        | A | P |   | 7.18098  |
| 6.809665 |          |          | 7.941016 | A |   | A | 5.689385 |
| 10.17705 | 11.18899 | 8.583529 | 9.137071 | P | P | P | 11.46327 |
| 10.21743 | 11.03269 | 9.887121 | 8.908165 | P | P | P | 10.51361 |
|          |          |          | 6.653495 |   |   | A |          |
| 5.576653 | 5.474182 |          | 6.93906  | P |   | A | 5.998359 |
| 7.891237 | 7.501023 | 8.789341 | A        | P | P |   | 6.867644 |

|          |          |          |          |   |   |   |          |
|----------|----------|----------|----------|---|---|---|----------|
| 5.436027 |          | 6.912207 | 7.79855  | P |   | A | 6.576391 |
| 3.711518 |          |          | P        |   |   |   | 5.163507 |
| 8.022227 | 7.508302 | 6.263691 | 7.459376 | A | P | P | 3.788294 |
| 8.547091 | 7.223346 | 6.664684 | 7.435958 | A | P | P | 3.856701 |
| 9.617674 | 10.79904 | 10.25675 | 9.610457 | P | P | P | 11.0577  |
| 7.44122  | 6.767098 | 6.290196 | 7.66581  | P | P | A | 6.912192 |
| 5.798163 |          | 6.251415 | A        |   | A |   | 5.107045 |
| 8.990268 | 9.29823  | 8.20956  | 7.83469  | P | P | P | 8.55651  |
| 6.885789 | 5.833877 | 6.834101 | 7.365536 | P | P | P | 7.368702 |
| 5.988184 | 5.450678 | 3.631552 | A        | A | P |   | 6.62839  |
| 7.475437 | 6.76935  | 6.106278 | 6.921645 | P | P | P | 8.043518 |
| 13.19387 | 12.93759 | 11.63762 | 11.60861 | P | P | P | 13.10308 |
| 4.149414 |          |          | P        |   |   |   | 5.364185 |
|          |          |          | 6.814925 |   |   | A |          |
| 12.61887 | 12.25587 | 10.75569 | 11.13313 | P | P | P | 12.70172 |
| 12.41428 | 12.03051 | 10.29374 | 10.74935 | P | P | P | 12.48572 |
|          |          |          | 2.008516 |   |   | P |          |
| 5.84768  | 6.059587 | 5.24968  | A        | P | P |   | 6.012477 |
| 6.480553 | 5.686637 | 4.561665 | 5.219126 | P | P | P | 5.795019 |
| 6.32856  | 5.683238 | 6.676858 | 7.638849 | P | A | P | 6.951083 |
| 8.434114 | 9.092511 | 8.785847 | 9.150524 | P | P | P | 9.480321 |
|          | 5.467264 |          | 6.905872 | P |   | A |          |
| 6.415184 | 5.486229 | 6.470805 | 6.702443 | P | P | P | 6.22425  |
| 9.461939 | 8.689596 | 8.627504 | 7.596682 | P | P | P | 9.396984 |
| 8.960917 | 8.89076  | 8.018996 | 7.424844 | P | P | P | 9.134385 |
| 4.622406 |          | 7.277174 | 2.918772 | P | P | P | 6.755146 |
| 4.873776 | 5.515922 |          | 6.417357 | P |   | P | 6.393749 |
| 5.423516 | 5.003455 | 7.24701  | 6.481017 | P | M | A | 5.640278 |
| 5.875697 | 5.798428 | 5.732764 | P        | P | P |   | 7.012553 |
| 7.564818 | 6.942032 | 7.884679 | 7.202374 | A | P | P | 6.805758 |
|          | 7.699437 |          | 8.666244 | M |   | A |          |
| 5.874681 |          |          | A        |   |   |   | 4.617861 |
| 8.249914 | 8.320142 | 7.349376 | 6.984106 | P | P | P | 8.196651 |
| 6.25136  | 5.884311 |          | A        | A |   |   | 5.631779 |
| 5.615286 | 5.032804 |          | P        | M |   |   | 6.98072  |
| 7.428792 | 7.302163 | 6.722837 | 6.644291 | P | P | P | 7.122712 |
| 5.68312  | 5.101681 | 4.631373 | 1.07255  | M | P | P | 5.912251 |
| 6.652031 | 5.573289 | 5.811091 | 4.686013 | P | P | P | 4.99664  |
| 6.276012 | 5.755009 | 5.288405 | 6.143376 | A | A | P | 5.511173 |
| 6.0976   | 5.739032 | 5.370002 | 3.374223 | A | M | P | 5.49169  |

|          |          |          |          |   |   |   |          |
|----------|----------|----------|----------|---|---|---|----------|
| 6.967697 | 6.921506 | 6.325847 | 5.314042 | P | P | P | 6.16203  |
| 7.584145 |          | 8.587729 | 8.484123 |   | A | A | 4.662043 |
|          | 5.091178 | 2.731194 | 6.26839  | A | M | P |          |
|          | 4.276239 | 5.067252 |          | P | P |   |          |
| 12.19465 | 12.91334 | 11.90365 | 11.38062 | P | P | P | 12.7754  |
|          |          | 5.192558 | 4.468882 |   | M | M |          |
| 7.582877 | 5.960778 | 6.914794 | 6.800981 | P | P | P | 5.670054 |
| 9.720085 | 9.754531 | 10.38025 | 10.7876  | P | P | P | 10.07167 |
| 5.813548 | 6.033773 | 6.15627  |          | P | P |   | 7.048093 |
| 7.637161 | 7.109792 | 8.369524 | 8.623157 | P | P | P | 7.555849 |
| 6.83374  | 6.623699 | 5.584626 | 7.519613 | P | P | P | 7.177397 |
| 6.440724 | 6.245552 | 6.642309 | 5.952811 | A | A | P | 5.221704 |
| 6.394409 | 5.415054 | 7.937218 | 8.27993  | A | P | P | 6.869097 |
| 12.99342 | 13.07612 | 12.84041 | 11.44447 | P | P | P | 13.1524  |
| 10.25477 | 9.672647 | 9.132582 | 8.428701 | P | P | P | 9.377273 |
| 9.433116 | 9.696528 | 10.14468 | 10.46228 | P | P | P | 9.541926 |
| 7.5647   |          | 5.232788 | 7.442684 |   | P | P | 6.154945 |
| 6.20014  | 5.192419 | 5.193529 |          | P | P |   | 5.796222 |
| 9.356343 | 8.609714 | 9.489932 | 9.582732 | P | P | P | 8.58086  |
| 6.475574 |          | 7.300009 |          |   | A |   | 5.383361 |
| 6.365393 | 6.486504 | 6.102647 | 5.856766 | P | P | P | 6.105612 |
| 8.556759 | 8.0631   | 9.178988 | 8.801897 | P | P | P | 8.49666  |
|          | 3.957071 |          |          | M |   |   |          |
| 5.42725  |          |          | A        |   |   |   | 3.835438 |
| 7.496178 | 8.005457 | 10.38547 | 9.913424 | P | P | A | 7.573475 |
| 6.276928 | 6.703636 | 8.394216 | 7.241395 | P | P | P | 7.051293 |
| 6.121444 | 5.769073 | 5.983662 | 6.711546 | A | P | M | 6.244076 |
| 6.934243 | 6.133098 | 6.602016 | 7.510659 | P | P | P | 6.871823 |
| 6.273413 |          | 5.926263 | A        |   | P |   | 2.689491 |
|          | 4.67843  |          |          | A |   |   |          |
| 6.407561 | 6.569516 | 4.822182 | 6.679013 | P | P | P | 5.995862 |
|          |          | 3.90538  |          |   | P |   |          |
| 9.05423  | 7.936725 | 6.975803 | 8.53645  | P | P | P | 8.659157 |
|          | 5.481708 |          | 7.498281 | A |   | A |          |
|          |          |          | 4.074188 |   |   | P |          |
| 8.359897 | 8.251043 | 3.785969 | 6.697079 | P | P | P | 8.695339 |
| 7.936069 | 7.530021 | 6.645129 | 5.930914 | P | P | P | 6.990926 |
| 9.618012 | 9.07539  | 9.792375 | 9.83603  | P | P | P | 8.643649 |
| 8.847357 | 8.431227 | 8.958722 | 9.324126 | P | P | P | 8.762941 |
| 6.818215 | 7.28525  | 8.088929 | 8.505153 | P | P | P | 6.889276 |

|          |          |          |          |   |   |   |          |
|----------|----------|----------|----------|---|---|---|----------|
| 7.840368 | 7.407747 | 8.34121  | 7.884976 | P | P | P | 7.298435 |
| 6.297418 | 7.038565 | 6.712853 | 6.186997 | A | P | M | 6.429718 |
| 10.63576 | 10.3333  | 9.966744 | 10.19391 | P | P | P | 10.90537 |
| 8.086643 | 7.772059 | 8.779386 | 8.682109 | P | P | P | 8.094246 |
| 7.267613 | 7.061953 | 7.585576 | 6.281793 | P | P | P | 7.623999 |
| 6.419762 | 4.594906 | 5.704764 | 7.447387 | A | P | P | 5.225869 |
| 6.553448 |          | 6.600065 | A        |   | A |   | 6.36617  |
| 10.5295  | 10.87897 | 8.672494 | 8.527665 | P | P | P | 10.41987 |
| 5.960937 | 6.113756 | 5.945941 | 4.296793 | P | P | P | 7.120683 |
| 6.409676 | 7.942948 | 6.896172 | 7.498421 | P | P | A | 7.870196 |
| 10.68206 | 11.72307 | 10.31909 | 8.604124 | P | P | P | 10.57243 |
| 12.89429 | 12.90101 | 14.31591 | 14.2236  | P | P | P | 12.00608 |
|          |          | 9.101898 | 10.03753 |   | A | A |          |
| 5.158704 | 6.126723 | 2.535846 | 1.092661 | P | P | P | 6.345185 |
| 9.170351 | 8.754424 | 9.158074 | 9.194869 | P | P | P | 8.419496 |
| 10.23599 | 10.64687 | 9.453745 | 9.190947 | P | P | P | 10.21375 |
|          | 6.10873  | 3.526206 | 4.798425 | P | P | P |          |
|          |          | 6.985372 |          |   | A |   |          |
| 10.52304 | 9.885413 | 11.43877 | 11.14798 | P | P | P | 9.774796 |
| 6.308443 | 6.263244 | 7.04903  | P        | A | A |   | 6.32085  |
| 6.490618 | 6.606865 | 6.215991 | 7.930233 | A | P | A | 6.458564 |
| 7.159154 | 6.988678 | 5.431698 | 5.067382 | P | P | P | 6.471699 |
| 11.00965 | 11.1587  | 9.82991  | 10.29784 | P | P | P | 11.62547 |
| 8.55333  | 9.197701 | 8.306478 | 8.057757 | P | P | P | 8.858051 |
| 8.707009 | 7.966454 | 7.207995 | 6.436404 | P | P | P | 7.403245 |
| 12.22818 | 11.32813 | 10.53151 | 10.75217 | P | P | P | 11.69969 |
| 7.122909 | 5.888618 | 7.657031 | 7.016494 | P | A | A | 6.220364 |
| 7.369324 | 7.103735 | 7.08284  | A        | A | P |   | 6.219582 |
| 7.066089 | 7.189293 | 7.261279 | 7.412741 | P | P | P | 6.937619 |
| 7.737467 | 7.507152 | 8.330675 | 7.350459 | P | A | P | 8.260037 |
| 9.923218 | 8.874082 | 8.344447 | 8.87059  | P | P | P | 9.367782 |
| 9.289355 | 8.25839  | 8.760338 | 9.009716 | P | P | P | 9.079855 |
| 11.9524  | 12.95924 | 13.02475 | 12.40165 | P | P | P | 13.10312 |
| 9.96046  | 8.955363 | 7.648206 | 8.375501 | P | P | P | 8.898104 |
| 10.53418 | 10.55097 | 9.577152 | 10.75104 | P | P | P | 10.77733 |
| 7.354281 | 6.328114 | 5.657262 | 7.427964 | P | P | P | 6.837967 |
| 8.868661 | 9.118498 | 8.116871 | 7.680524 | P | P | P | 8.490117 |
| 8.100697 | 7.076341 | 7.970716 | A        | P | P |   | 6.988205 |
| 11.83917 | 12.02226 | 11.33538 | 11.13752 | P | P | P | 12.03387 |
| 11.40125 | 11.57288 | 12.27366 | 12.78069 | P | P | P | 12.02608 |



|          |          |          |          |   |   |   |          |
|----------|----------|----------|----------|---|---|---|----------|
| 8.819468 | 9.002297 | 9.288604 | 9.716614 | P | P | P | 9.434713 |
| 9.943686 | 9.914787 | 11.04489 | 11.2741  | P | P | P | 9.570106 |
| 10.38588 | 10.04788 | 10.85632 | 10.98674 | P | P | P | 10.06557 |
| 9.373448 | 9.450891 | 7.972351 | 8.07171  | P | P | P | 9.73188  |
|          |          |          | 1.339109 |   |   | P |          |
| 7.166103 | 6.543791 | 7.79441  | 5.76123  | P | P | P | 6.483468 |
| 9.105523 | 8.635386 | 8.022949 | 8.044302 | P | P | P | 8.693742 |
| 6.743949 | 6.233744 | 5.201635 | 7.216531 | P | P | A | 6.045702 |
| 6.278577 | 7.147098 | 6.420457 | P        | P | P |   | 5.943417 |
| 8.769668 | 7.426457 | 9.466384 | 9.652545 | P | P | P | 9.113768 |
| 8.288043 | 7.607019 | 8.178608 | 9.125611 | P | P | P | 8.225022 |
| 7.224763 |          |          | P        |   |   |   | 8.397159 |
| 6.135873 | 5.59972  | 5.753954 | A        | P | P |   | 5.895245 |
| 10.82539 | 10.57862 | 9.902113 | 10.20185 | P | P | P | 10.76997 |
| 9.617091 | 10.3254  | 7.025092 | 7.345042 | P | P | A | 1.429692 |
| 10.08664 | 8.819282 | 9.772736 | 9.652013 | P | P | P | 8.499204 |
| 5.794472 | 7.177871 | 6.342021 | 6.07151  | P | P | P | 6.920354 |
| 9.705811 | 9.155703 | 9.234952 | 11.32032 | P | P | P | 10.43441 |
| 7.967308 | 6.382475 | 7.844667 | 7.636719 | P | P | P | 7.028987 |
| 8.991583 | 11.35321 | 8.030256 | 7.822553 | P | P | P | 9.959934 |
| 11.68361 | 12.17901 | 11.19878 | 10.71983 | P | P | P | 12.25422 |
| 11.13608 | 10.85669 | 11.3665  | 12.30399 | P | P | P | 11.24698 |
| 9.859962 | 8.915749 | 10.42859 | 10.24859 | P | P | P | 9.003255 |
| 10.55369 | 10.37229 | 9.64393  | 9.436021 | P | P | P | 8.77077  |
| 7.183336 | 6.719725 | 7.924215 | 7.53712  | P | P | P | 7.916277 |
| 6.033521 | 5.529598 | 6.063877 | 3.177887 | P | P | P | 4.905605 |
| 7.099149 | 7.057625 | 8.599622 | 7.737736 | P | P | A | 7.787215 |
| 9.600898 |          | 11.01981 | 11.47449 |   | A | A | 7.709838 |
| 7.438003 | 6.333707 | 7.860788 | 8.231862 | P | P | P | 7.077191 |
| 7.553909 | 8.219206 | 7.325909 | 6.269596 | P | P | P | 7.762889 |
| 5.705322 | 5.025705 |          | A        | M |   |   | 4.663147 |
|          |          | 7.005128 |          |   | P |   |          |
|          |          |          | 6.90506  |   |   | A |          |
|          | 4.037291 |          |          | M |   |   |          |
|          | 5.32548  |          |          | A |   |   |          |
| 7.37293  |          | 7.04585  | 6.934402 |   | A | A | 5.633453 |
| 12.35518 | 13.22969 | 13.53212 | 13.1885  | P | P | P | 13.40888 |
| 9.15515  | 9.498277 | 8.654998 | 8.756812 | P | P | P | 10.23109 |
|          | 4.931588 | 5.561312 | 6.713141 | P | P | A |          |
| 7.705284 | 7.173747 | 7.385942 | 7.653672 | A | A | P | 7.545796 |

|          |          |          |            |   |   |   |          |
|----------|----------|----------|------------|---|---|---|----------|
| 5.55667  |          |          | 6.813043 A |   |   | A | 3.152041 |
| 9.728791 | 10.66099 | 9.483316 | 8.612896 P | P | P | P | 10.25683 |
| 12.51802 | 12.75547 | 11.20505 | 11.0225 P  | P | P | P | 12.61746 |
| 6.577629 | 5.031    |          | A          | P |   |   | 5.357064 |
| 8.697633 | 9.033875 | 8.314422 | 7.777126 P | P | P | P | 8.910303 |
| 10.62358 | 11.29249 | 10.8418  | 11.53714 P | P | P | P | 11.82152 |
| 7.179315 | 8.075309 | 9.706911 | 9.508075 P | P | P | P | 9.155072 |
| 10.52034 | 10.6896  | 9.912382 | 8.926574 P | P | P | P | 10.34094 |
| 6.034932 | 6.414051 | 6.460241 | 6.686658 A | P | P | P | 4.860676 |
| 9.059227 | 8.962175 | 8.112751 | 6.847413 P | P | P | P | 9.091584 |
| 6.339153 | 6.219825 |          | 6.998041 A | P |   | A | 5.36853  |
| 9.45909  | 9.270268 | 10.27758 | 9.916222 P | P | P | P | 8.958672 |
| 13.5823  | 13.25928 | 12.79552 | 12.5884 P  | P | P | P | 13.63191 |
| 10.18477 | 10.28019 | 9.668761 | 9.334686 P | P | P | P | 10.17577 |
| 3.697004 |          |          | P          |   |   |   | 6.032552 |
| 5.452755 |          |          | 6.509067 A |   |   | P | 4.409842 |
| 7.979812 | 7.453758 | 7.366131 | 6.674534 P | P | P | P | 6.884631 |
| 7.228857 | 7.203403 | 7.216076 | 7.029222 P | P | P | P | 7.721033 |
|          |          |          | 2.335904   |   |   | M |          |
| 5.113502 |          | 3.514981 | M          |   | P |   | 5.811309 |
| 6.707658 | 6.593494 | 5.958998 | 6.37765 A  | A | P | P | 6.393192 |
| 9.397594 | 8.576511 | 10.02701 | 10.05317 P | P | P | P | 9.454957 |
| 9.230413 | 9.823701 | 9.394225 | 8.552279 P | P | P | P | 9.686725 |
| 9.615433 | 9.63677  | 9.459058 | 8.605185 P | P | P | P | 9.883424 |
| 7.262568 | 6.903563 | 7.015469 | 4.209451 P | P | P | P | 6.636227 |
| 10.10162 | 9.822718 | 10.58089 | 10.63308 P | P | P | P | 9.058229 |
| 9.755507 | 8.716236 | 9.178991 | 9.103739 P | P | P | P | 8.492166 |
| 10.78968 | 10.97682 | 10.22174 | 9.654978 P | P | P | P | 11.00344 |
| 5.676385 | 5.250771 | 4.808083 | A          | A | P |   | 1.616033 |
| 9.012914 | 9.550707 | 7.577452 | 8.27289 P  | P | P | P | 9.22999  |
| 6.407825 | 6.171229 | 3.168872 | 4.075562 M | A | P | P | 6.893537 |
| 11.09087 | 10.88787 | 10.22183 | 10.0668 P  | P | P | P | 10.75138 |
| 10.91581 | 10.82725 | 9.897337 | 9.572012 P | P | P | P | 10.50522 |
|          |          |          | 6.471636   |   |   | A |          |
| 9.416892 | 9.366945 | 8.167351 | 7.779044 P | P | P | P | 9.374368 |
|          | 5.238862 | 4.58626  |            | M | P |   |          |
| 8.692901 | 9.247111 | 10.01018 | 9.058734 P | P | P | P | 8.603148 |
| 11.25565 | 9.286612 | 9.384386 | 9.351092 P | P | P | P | 9.216197 |
| 7.172329 | 6.762142 | 8.041464 | 8.021724 P | P | P | P | 7.157486 |
| 8.466634 | 8.478316 | 8.904189 | 8.631784 P | P | P | P | 8.826736 |

|          |          |          |            |   |   |   |          |
|----------|----------|----------|------------|---|---|---|----------|
| 12.29735 | 12.6262  | 10.03932 | 10.70217 P | P | P | P | 12.67741 |
| 9.171976 | 9.634747 | 7.41702  | 8.163852 P | P | P | P | 9.926758 |
| 6.41586  | 6.166032 |          | 3.928218 P | P |   | P | 5.886823 |
| 7.219826 | 6.756465 | 6.769369 | 2.480813 P | P | P | P | 6.938719 |
|          | 5.01201  | 7.395614 |            | P | A |   |          |
| 5.678835 | 5.185194 |          | 6.774698 P | P |   | P | 6.827158 |
| 12.55021 | 12.67575 | 11.86081 | 11.37411 P | P | P | P | 12.49078 |
| 7.657507 | 6.327767 | 7.293384 | 8.950932 A | A | A | A | 4.74292  |
| 9.226769 | 9.257608 | 10.47107 | 11.54535 P | P | P | P | 9.506781 |
| 11.22287 | 11.40787 | 12.20636 | 12.23365 P | P | P | P | 11.08748 |
| 12.22947 | 11.63299 | 9.634805 | 11.372 P   | P | P | P | 10.98482 |
| 4.989661 | 4.941398 | 6.185226 | 5.998262 P | A | P | A | 5.329663 |
| 5.367804 |          |          | 5.664953 A |   |   | P | 2.990062 |
|          |          | 7.013854 | 7.486975   |   | A | A |          |
| 11.02155 | 11.22506 | 10.54002 | 10.11417 P | P | P | P | 10.70678 |
| 6.110694 | 7.312349 | 5.880598 | 6.521394 P | P | P | P | 5.52522  |
| 4.46846  | 6.251562 |          | P          | P |   |   | 6.748176 |
| 5.88113  |          | 5.991052 | A          |   | A |   | 5.548653 |
| 8.147918 | 8.449945 | 8.765657 | 7.927845 P | P | P | P | 8.140015 |
| 14.33305 | 14.95632 | 15.15565 | 15.74557 P | P | P | P | 15.20231 |
| 14.47557 | 14.90884 | 15.14839 | 15.84205 P | P | P | P | 15.25117 |
| 10.0887  | 10.42923 | 9.510979 | 9.044335 P | P | P | P | 10.55021 |
| 6.556724 |          | 6.731907 | A          |   | A |   | 6.019552 |
| 8.296136 | 8.013502 | 9.28721  | 9.844065 P | P | P | P | 8.421266 |
| 8.954475 | 9.357196 | 8.35294  | 7.84757 P  | P | P | P | 9.067211 |
| 6.256708 | 6.565    | 5.785289 | 5.663842 A | P | P | P | 6.314907 |
| 12.46337 | 13.16357 | 12.1174  | 11.93851 P | P | P | P | 12.99815 |
| 5.994169 | 5.380488 | 6.034223 | A          | P | P |   | 6.292169 |
|          |          | 8.603095 | 8.962305   |   | A | A |          |
| 9.135054 | 8.494613 | 9.804339 | 9.547251 P | P | P | P | 8.449011 |
| 8.111329 | 8.366673 | 10.37216 | 9.751262 P | P | P | P | 8.207284 |
|          |          |          | 6.820831   |   |   | A |          |
| 7.348383 | 6.276044 | 6.597424 | 6.127005 A | P | A | P | 6.016449 |
| 10.10426 | 9.772505 | 10.77806 | 10.96829 P | P | P | P | 9.753345 |
| 7.748938 | 8.189351 | 8.330772 | 9.073553 M | P | P | P | 8.116294 |
| 6.482839 | 6.510874 |          | 2.832552 A | A |   | P | 6.278574 |
| 8.734611 | 8.442044 | 7.173526 | 8.145732 P | P | P | P | 8.967969 |
| 10.45898 | 10.91514 | 8.62552  | 9.310576 P | P | P | P | 10.98018 |
| 6.252695 | 7.000207 | 5.401298 | 6.972786 P | P | P | P | 6.386571 |
| 10.18714 |          | 9.888063 | 10.08091 A |   | A | A | 3.814652 |

|          |          |          |          |   |   |   |          |
|----------|----------|----------|----------|---|---|---|----------|
| 12.39074 | 10.84063 | 11.54933 | 11.59071 | P | P | P | 11.11972 |
| 11.21769 | 9.455159 | 10.23179 | 10.33418 | P | P | P | 10.06315 |
| 7.421666 | 6.14647  | 6.414561 | 7.453044 | A | P | P | 6.670809 |
| 8.531855 | 8.809976 | 7.292312 | 7.092895 | P | P | P | 8.894327 |
| 6.149784 |          | 6.850762 | 6.793716 | M |   | A | 5.451952 |
| 7.339416 | 7.651117 | 7.326642 | 6.958761 | P | P | P | 7.083608 |
| 5.943348 | 7.011423 | 6.708382 |          | A | P |   | 5.602506 |
| 7.269351 | 6.947053 | 7.275262 |          | A | A |   | 6.288422 |
| 10.18152 | 10.41686 | 10.41817 | 11.06087 | P | P | P | 10.36026 |
| 13.56452 | 13.52551 | 13.78375 | 14.81912 | P | P | P | 13.96313 |
| 9.994202 | 10.83305 | 11.34016 | 11.77516 | P | P | P | 10.70877 |
| 7.184394 | 6.692079 | 7.097247 | 8.229859 | P | P | P | 7.640839 |
| 11.54995 | 10.1034  | 12.44751 | 12.9155  | P | P | P | 9.685694 |
| 5.915772 | 7.701234 | 5.947334 | 6.561121 | P | P | P | 6.536824 |
| 9.821785 | 9.66247  | 10.25669 | 10.12911 | P | P | P | 9.749527 |
| 11.40524 | 11.60034 | 9.753276 | 10.19619 | P | P | P | 11.35727 |
| 8.647402 | 9.120161 | 7.636449 | 8.598761 | P | P | P | 9.847034 |
| 6.149897 | 8.526835 | 4.960837 |          | P | P |   | 6.521008 |
| 9.065769 | 9.651888 | 8.613478 | 7.931103 | P | P | P | 8.820768 |
| 6.792928 | 6.6924   | 7.280106 | 7.420334 | P | P | P | 7.859991 |
|          |          |          | 3.477076 |   |   | M |          |
| 9.240638 | 7.67307  | 8.954453 | 8.28809  | P | P | P | 7.903835 |
|          |          | 7.141014 |          |   | A |   |          |
| 7.35753  | 7.228555 | 8.183342 | 8.301224 | P | P | P | 7.420588 |
| 7.46256  | 6.795917 | 5.589211 | 6.254805 | P | P | P | 6.767373 |
| 8.819348 | 8.095335 | 8.724122 | 9.599264 | P | P | P | 8.872854 |
| 8.334818 | 6.077143 | 6.783845 | 5.808353 | P | P | P | 6.795131 |
| 7.689301 | 7.3012   | 7.193092 | 7.128385 | P | P | P | 6.144377 |
| 6.790746 | 7.373282 |          |          | P |   |   | 7.031039 |
| 10.09728 | 9.505199 | 9.997266 | 9.5036   | P | P | P | 8.643518 |
| 6.904199 | 5.908681 | 7.810261 | 6.413161 | P | A | P | 6.202128 |
| 8.599175 | 7.636734 | 8.736496 | 8.105808 | M | A | P | 7.993206 |
| 8.157995 | 8.878091 | 7.071254 | 6.981838 | P | P | P | 7.688199 |
| 6.337653 | 5.898313 | 6.397705 | 7.46343  | A | A | A | 7.091456 |
|          | 6.288642 |          |          | A |   |   |          |
| 8.049205 | 7.244507 | 9.146623 | 9.499378 | P | P | P | 7.218807 |
| 11.48713 | 11.22829 | 12.31016 | 12.71644 | P | P | P | 11.23633 |
| 6.368205 | 5.834246 | 7.704768 |          | A | P |   | 6.265073 |
| 6.736871 | 6.67117  | 7.321659 | 7.44811  | A | A | P | 5.912257 |
| 6.882851 | 6.410648 | 5.06391  | 4.500747 | P | P | P | 5.511093 |

|          |          |          |          |   |   |   |   |          |
|----------|----------|----------|----------|---|---|---|---|----------|
| 5.64864  |          |          |          | A |   |   |   | 2.283844 |
| 7.868105 | 8.088514 | 8.107631 | 8.556224 | P | P | P | P | 7.546734 |
| 11.05856 | 12.06196 | 8.956055 | 9.37896  | P | P | P | P | 11.67309 |
| 13.3794  | 14.13236 | 11.25112 | 11.29801 | P | P | P | P | 13.60062 |
| 8.727982 | 7.599732 | 8.924634 | 9.530512 | P | P | P | P | 7.409736 |
| 3.13445  | 6.71425  |          |          | P |   |   |   | 5.890055 |
| 8.773291 | 8.188429 | 9.239556 | 9.556337 | P | P | P | P | 8.4281   |
| 8.056768 | 7.616686 | 7.323216 | 5.955932 | P | P | P | P | 7.195766 |
| 7.81067  | 7.397406 | 6.341601 | 6.60936  | P | P | P | P | 7.497362 |
| 7.017144 | 6.645297 | 6.107326 |          | M | P |   |   | 5.735267 |
| 7.100175 |          | 6.786876 | 7.602373 | M |   | A | A | 6.919523 |
|          | 5.417613 | 6.828536 |          | A | A |   |   |          |
| 5.874377 |          | 3.969384 |          | P | M |   |   | 5.32631  |
| 12.17959 | 11.45524 | 12.14977 | 12.15142 | P | P | P | P | 11.65849 |
| 8.074181 | 7.226011 | 7.447847 | 8.063811 | P | P | P | P | 7.598698 |
| 7.221466 | 7.325497 | 6.107292 | 4.343019 | P | P | P | P | 6.67162  |
| 6.318226 |          | 6.514921 | 5.895991 | A |   | A | P | 5.285822 |
| 11.40235 | 11.10911 | 10.15988 | 10.3366  | P | P | P | P | 11.37158 |
|          | 6.81755  | 3.748265 |          | P | P |   |   |          |
| 4.799589 | 4.351361 | 5.094794 | 5.465194 | P | M | P | P | 6.024063 |
| 6.101089 | 4.807704 | 5.292967 |          | P | M |   |   | 4.93992  |
| 8.367916 | 8.229284 | 8.667312 | 7.822679 | P | P | P | P | 7.418927 |
| 9.752246 | 8.923156 | 9.452854 | 7.239852 | P | P | P | P | 8.033553 |
| 8.230267 | 8.743029 | 9.057851 | 8.241393 | P | P | P | P | 9.299476 |
|          |          | 6.814282 |          |   |   |   | A |          |
| 6.222985 | 7.08378  | 7.84369  | 5.901903 | P | A | P | P | 6.887588 |
| 5.310845 | 5.531397 | 6.577235 | 6.176124 | A | A | P | P | 3.693022 |
| 5.866879 | 6.724677 | 5.687583 |          | P | A | P |   | 6.910326 |
| 10.72634 | 10.54577 | 11.49945 | 11.25563 | P | P | P | P | 9.99749  |
| 8.65439  | 7.220204 | 8.85838  | 8.420338 | P | P | P | P | 7.518472 |
| 10.7057  | 10.59181 | 9.787025 | 9.851748 | P | P | P | P | 10.55561 |
| 9.298512 | 9.788193 | 9.637002 | 8.767815 | P | P | P | P | 9.725868 |
| 7.297991 | 6.786708 | 7.988001 | 7.301212 | P | P | P | P | 6.931103 |
| 7.358569 |          | 7.676193 | 7.98872  | A |   | A | M | 5.502817 |
| 7.63803  |          | 7.681653 |          | A |   | P |   | 6.59023  |
| 5.88568  | 6.315592 | 6.445667 | 6.634344 | P | A | A | P | 6.717978 |
| 8.558586 | 9.088167 | 11.31847 | 10.46992 | P | P | P | P | 8.18687  |
| 8.823649 | 8.239872 | 9.204837 | 8.243136 | P | P | P | P | 7.464318 |
| 10.21335 | 9.640325 | 9.245039 | 9.345156 | P | P | P | P | 10.08141 |
| 12.16473 | 12.05077 | 12.83273 | 13.29283 | P | P | P | P | 12.20237 |

|          |          |          |          |   |   |   |          |
|----------|----------|----------|----------|---|---|---|----------|
| 7.139464 | 6.076343 | 7.486924 | 8.220711 | P | P | P | 7.26148  |
| 9.437229 | 8.828506 | 9.746642 | 10.25164 | P | P | P | 8.551009 |
| 7.30152  | 6.248657 | 8.232876 | 7.818104 | P | P | P | 7.053243 |
| 8.52783  | 8.522379 | 9.118917 | 8.640584 | P | P | P | 8.716233 |
| 9.446696 | 8.491215 | 9.747211 | 10.12028 | P | P | P | 8.987849 |
| 10.80413 | 10.47095 | 11.70386 | 11.00526 | P | P | P | 9.284353 |
| 6.795603 | 5.574284 | 5.6712   | P        | P | P |   | 6.240488 |
| 9.172804 | 8.521155 | 8.895059 | 8.874155 | P | P | P | 7.888555 |
| 9.929078 | 10.29247 | 9.04409  | 8.631705 | P | P | P | 10.13217 |
| 11.24801 | 11.70402 | 10.42146 | 10.60586 | P | P | P | 11.53649 |
| 7.796567 | 8.189914 | 6.733551 | 8.115359 | P | P | P | 8.636552 |
| 6.803887 | 5.955069 | 8.004871 | 7.715367 | P | A | P | 6.882365 |
| 9.09967  | 8.72436  | 10.22789 | 9.366829 | P | P | P | 9.087877 |
| 7.892966 | 7.940157 | 7.577438 | 5.271904 | P | P | P | 8.004012 |
| 13.28242 | 14.82379 | 13.37642 | 12.36405 | P | P | P | 14.7151  |
|          |          |          | 6.880206 |   |   | A |          |
| 8.701201 | 8.711984 | 9.696317 | 10.39665 | P | P | P | 8.625464 |
| 8.920786 | 9.448334 | 8.301663 | 7.851259 | P | P | P | 8.876703 |
| 6.301222 | 5.161136 | 6.601401 | 7.001124 | P | A | A | 6.319888 |
| 12.30424 | 11.71185 | 12.89794 | 13.27543 | P | P | P | 11.55257 |
| 12.50135 | 12.01999 | 11.43744 | 11.85102 | P | P | P | 12.24232 |
| 13.10275 | 12.79865 | 12.34088 | 11.87908 | P | P | P | 13.00931 |
| 10.34992 | 9.067563 | 9.250185 | 9.270309 | P | P | P | 8.985131 |
| 10.38772 | 9.444124 | 9.403888 | 8.438883 | P | P | P | 8.768881 |
| 10.16956 | 9.579682 | 9.094101 | 8.91108  | P | P | P | 8.831851 |
| 9.689781 | 11.05205 | 11.22543 | 8.880253 | P | P | P | 11.30217 |
| 6.687634 | 6.389053 | 7.559096 | 8.150588 | P | P | A | 7.447766 |
| 11.08425 | 11.4803  | 10.10485 | 9.708624 | P | P | P | 11.61721 |
| 10.04232 | 9.133036 | 11.21158 | 11.79521 | P | P | P | 9.303763 |
| 7.177531 | 7.347407 | 7.552339 | 8.52806  | P | P | M | 7.225882 |
|          | 5.6397   | 5.48543  |          | A | M |   |          |
|          | 7.29224  | 7.865704 |          | A | A |   |          |
| 5.137664 | 5.785152 |          | 6.012544 | A |   | M | 6.126012 |
| 13.04906 | 12.76323 | 13.50488 | 13.56342 | P | P | P | 14.10751 |
| 13.9499  | 13.59971 | 14.4542  | 14.77081 | P | P | P | 14.8607  |
| 10.83314 | 11.00293 | 11.50457 | 11.90706 | P | P | P | 11.08395 |
| 14.68699 | 14.56799 | 15.09958 | 16.02027 | P | P | P | 15.4538  |
| 14.18788 | 14.18331 | 14.68214 | 15.25399 | P | P | P | 15.27138 |
| 6.155186 | 5.278151 | 6.277164 | A        | P | A |   | 5.125351 |
| 8.112549 | 8.357907 | 8.279237 | 6.031621 | P | P | P | 7.879347 |

|          |          |          |          |   |   |   |          |
|----------|----------|----------|----------|---|---|---|----------|
| 10.37834 | 9.936888 | 11.1376  | 11.92892 | P | P | P | 10.20109 |
| 5.665359 | 6.387345 | 5.515379 | 6.468051 | A | P | P | 5.568884 |
| 9.775824 | 9.342059 | 9.670727 | 10.69784 | P | P | P | 8.929304 |
| 5.14238  |          |          | A        |   |   |   | 1.83883  |
| 5.071836 | 7.451589 | 6.504135 | 5.480375 | P | P | P | 6.380084 |
| 6.736823 | 6.445194 | 7.345323 | 8.198321 | P | P | P | 7.435043 |
| 7.034135 | 6.068211 | 6.399893 | 6.46499  | A | A | P | 5.345181 |
| 10.98562 | 10.19557 | 11.24968 | 10.77676 | P | P | P | 9.977951 |
| 11.85592 | 11.87036 | 10.81271 | 10.33876 | P | P | P | 11.26177 |
| 7.918178 | 7.962694 | 6.90406  | 6.481091 | P | P | P | 7.119604 |
| 9.668517 | 10.02071 | 10.84664 | 10.27495 | P | P | P | 9.888326 |
| 4.312369 | 6.757535 | 6.182644 | 7.473198 | P | A | P | 8.122936 |
| 9.436418 | 8.840516 | 7.557415 | 7.459469 | P | P | P | 8.380982 |
| 8.951896 | 7.301076 | 6.360415 | 7.288164 | P | P | P | 7.723395 |
| 5.609969 |          |          | 3.399984 | P |   | P | 5.197888 |
| 8.283891 | 7.596272 | 8.164475 | 8.291009 | P | P | P | 8.278452 |
| 10.50441 | 10.71753 | 10.01504 | 9.214013 | P | P | P | 10.47249 |
| 6.807442 | 7.601173 | 7.346398 | 7.620111 | P | P | P | 7.852059 |
| 7.713759 | 6.974386 | 7.395732 | 8.31211  | P | P | P | 7.034236 |
| 5.572096 |          | 4.885634 | A        |   | M |   | 3.097502 |
| 12.08064 | 11.82007 | 11.08537 | 10.90854 | P | P | P | 11.81662 |
| 7.957672 | 7.589006 | 6.929067 | 6.973499 | P | P | P | 7.852276 |
| 10.92743 | 10.79748 | 10.20267 | 10.26483 | P | P | P | 10.59622 |
|          |          |          | 6.29406  |   |   | A |          |
| 11.74542 | 12.08296 | 12.77349 | 13.01965 | P | P | P | 12.00597 |
| 10.20945 | 8.236499 | 8.812073 | 8.142355 | P | P | P | 7.975974 |
| 8.498121 | 8.962003 | 8.516298 | 7.587422 | P | P | P | 8.676974 |
| 10.12767 | 10.16275 | 11.0739  | 11.55499 | P | P | P | 10.4767  |
| 7.355408 |          |          | A        |   |   |   | 3.802722 |
| 7.370121 | 7.391778 | 7.458957 | 7.27621  | P | P | M | 7.193525 |
| 9.307302 | 9.181864 | 8.656733 | 8.018592 | P | P | P | 8.603553 |
| 6.124361 | 5.890416 | 6.459657 | 6.550954 | A | P | P | 5.939048 |
| 12.62735 | 12.54189 | 12.03873 | 11.73049 | P | P | P | 12.24809 |
| 8.203553 |          |          | 9.259546 |   |   | A | 7.9605   |
|          |          |          | 7.35225  |   |   | A |          |
| 10.75691 | 11.54767 | 10.85228 | 10.24368 | P | P | P | 11.982   |
| 8.65337  | 7.739618 | 9.415928 | 8.819719 | P | P | P | 8.194922 |
| 7.913209 | 7.664125 | 7.981371 | 8.114531 | P | P | P | 7.067252 |
| 9.097935 | 9.950383 | 9.344147 | 10.83985 | P | P | P | 10.67014 |
| 5.801138 | 5.675559 | 5.985307 | 7.15107  | P | A | P | 5.790997 |

|          |          |          |            |   |   |   |          |
|----------|----------|----------|------------|---|---|---|----------|
|          | 5.980569 | 6.424258 | 6.842873   | P | A | A |          |
| 8.866648 | 9.907725 | 8.213464 | 9.146168 A | P | P | A | 5.771342 |
| 12.21095 | 12.32052 | 12.79742 | 13.77952 P | P | P | P | 12.65767 |
| 7.95533  | 8.497032 | 7.952059 | 9.38337 P  | P | P | P | 8.652846 |
| 9.40143  | 9.315598 | 10.49827 | 10.46647 P | P | P | P | 9.040252 |
| 11.28756 | 10.8184  | 11.50156 | 11.72514 P | P | P | P | 11.04352 |
| 7.324267 | 6.152765 | 7.316891 | 6.666377 P | A | P | P | 6.323234 |
| 11.62197 | 11.01951 | 11.58162 | 11.11487 P | P | P | P | 10.78294 |
|          | 6.376211 | 7.528993 |            | A | P |   |          |
| 8.110289 | 7.376918 | 6.683012 | 5.845355 P | P | P | P | 7.372837 |
| 9.682486 | 5.81384  | 9.99116  | 8.510377 P | P | P | P | 7.980209 |
| 8.989982 | 9.483393 | 8.685402 | 7.618206 P | P | P | P | 9.257952 |
| 9.323764 | 9.848735 | 9.107386 | 8.245313 P | P | P | P | 9.19276  |
| 8.249488 | 8.062934 | 8.448296 | 9.570286 P | P | P | P | 8.664685 |
| 7.075126 | 6.649974 | 7.819632 | 8.272278 P | P | P | P | 7.148105 |
| 8.793009 | 7.899963 | 8.296043 | 8.043887 P | P | P | P | 7.49071  |
|          | 3.811769 |          |            | P |   |   |          |
| 4.03583  | 4.833724 |          | M          | P |   |   | 5.633257 |
| 12.68092 | 13.18034 | 11.79317 | 11.91159 P | P | P | P | 12.99898 |
|          | 5.863175 |          |            | A |   |   |          |
| 12.89061 | 13.34836 | 13.0606  | 12.16187 P | P | P | P | 13.36737 |
| 6.032725 |          |          | P          |   |   |   | 7.330165 |
| 6.698567 | 5.455936 | 5.600372 | P          | P | P |   | 7.188808 |
| 9.457362 | 8.449175 | 8.401587 | 8.020781 P | P | P | P | 8.68287  |
|          | 7.259521 | 6.474805 | 7.9919     | P | P | A |          |
| 11.09935 | 10.86195 | 10.10695 | 9.670756 P | P | P | P | 10.91933 |
| 13.13833 | 13.87134 | 12.57492 | 12.43935 P | P | P | P | 13.82342 |
| 6.7316   | 6.926314 | 6.48112  | 6.588698 P | A | P | P | 7.112556 |
|          |          | 3.274759 |            |   | P |   |          |
| 12.47049 | 11.83309 | 13.35504 | 13.52412 P | P | P | P | 11.76798 |
|          | 5.808002 |          |            | P |   |   |          |
| 5.58693  |          | 6.44922  | 7.045994 A |   | A | A | 6.301166 |
| 9.236862 | 8.81563  | 9.198946 | 7.269579 P | P | P | P | 9.286303 |
| 4.212703 | 5.682421 | 5.764113 | 5.630157 P | A | A | M | 5.077765 |
| 13.4359  | 13.96353 | 12.76349 | 12.12783 P | P | P | P | 13.58734 |
| 5.777185 | 5.494377 |          | 6.00512 A  | P |   | A | 5.060292 |
| 9.867369 | 9.022962 | 10.0153  | 10.10073 P | P | P | P | 8.91799  |
| 11.74228 | 11.71396 | 12.84411 | 12.82057 P | P | P | P | 11.53047 |
| 7.999069 | 8.061592 | 6.577259 | 6.775013 P | P | P | P | 8.401277 |
| 3.390193 |          |          | 7.260916 M |   |   | A | 6.51427  |



|          |          |          |          |   |   |   |          |
|----------|----------|----------|----------|---|---|---|----------|
| 9.884769 | 10.04191 | 9.858118 | 8.991004 | P | P | P | 9.788446 |
| 7.425924 | 6.238253 | 6.62869  | 6.312512 | P | P | P | 6.945555 |
| 9.003551 | 8.540557 | 7.618911 | 8.33072  | P | P | P | 8.342233 |
| 6.977249 | 6.124216 | 8.282612 | A        | A | A |   | 6.230965 |
| 8.629819 | 7.908802 | 7.577083 | 7.988628 | P | P | P | 9.029797 |
| 8.773556 | 9.117559 | 8.285286 | 7.068929 | P | P | P | 8.774286 |
| 8.119485 | 7.135364 | 8.306161 | 7.759724 | P | P | P | 7.497502 |
| 7.173211 | 7.329052 | 8.044397 | 6.869895 | P | P | P | 8.764339 |
| 10.24397 | 9.649902 | 9.580183 | 9.517746 | P | P | P | 8.5218   |
| 6.707003 | 5.747154 | 6.880066 | 6.685764 | P | P | A | 6.325293 |
| 6.02973  |          |          | A        |   |   |   | 3.134378 |
| 5.023634 | 5.61822  |          | 6.76545  | P | A | M | 6.691582 |
| 5.926684 |          | 0.517135 | M        |   | M |   | 5.617993 |
| 10.78492 | 9.998545 | 13.02015 | 12.26714 | P | P | P | 9.72971  |
| 10.2853  | 9.493548 | 9.83445  | 9.413253 | P | P | P | 9.037629 |
| 5.398012 | 6.207655 | 7.335149 | 7.804534 | P | P | P | 6.388878 |
|          | 5.450934 | 5.620384 |          | A | A |   |          |
| 6.779125 | 5.863299 | 5.904187 | 7.080343 | P | P | A | 6.666877 |
| 6.545018 |          |          | A        |   |   |   | 4.057998 |
| 7.290135 | 7.27275  | 7.453402 | 8.022838 | P | P | P | 7.039352 |
| 7.860394 | 8.729966 | 6.450186 | 7.649923 | P | P | P | 7.908584 |
| 9.830746 | 8.23651  | 8.500171 | 7.864856 | P | P | P | 7.920692 |
| 12.2458  | 12.34851 | 13.17599 | 12.67137 | P | P | P | 11.81792 |
| 7.846221 | 6.712402 | 6.886518 | 7.298226 | P | P | P | 7.263111 |
| 5.772317 | 4.637475 | 6.529953 | 5.693709 | P | P | A | 5.530974 |
| 7.117074 | 5.164282 | 6.070146 | 6.334327 | P | A | P | 4.925347 |
| 8.026274 | 7.729788 | 3.168037 | 5.664413 | P | P | P | 7.262683 |
| 10.36545 | 11.33797 | 11.09583 | 10.90821 | P | P | P | 11.70198 |
| 10.13914 | 11.57876 | 11.49135 | 10.28396 | P | P | P | 11.75048 |
| 10.28679 | 11.43596 | 11.33292 | 10.46167 | P | P | P | 11.57665 |
| 12.03725 | 11.56975 | 12.23171 | 13.64571 | P | P | P | 11.70053 |
| 10.5881  | 10.22539 | 11.36873 | 12.18387 | P | P | P | 10.12994 |
| 8.75946  | 8.930422 | 9.532996 | 8.898976 | P | P | P | 8.507566 |
| 9.549975 | 9.402102 | 8.508449 | 9.113545 | P | P | P | 8.835909 |
| 5.961405 | 5.998317 | 5.969745 | 5.64736  | P | P | P | 2.878483 |
| 8.753582 | 8.525801 | 9.28663  | 8.003655 | P | P | P | 7.467108 |
| 6.171529 | 5.102435 |          | A        | A |   |   | 5.918313 |
| 11.47543 | 11.32209 | 10.93234 | 10.17533 | P | P | P | 10.85604 |
| 7.233844 | 6.586844 | 6.68101  | P        | P | P |   | 6.040968 |
| 8.717877 | 7.663711 | 9.145779 | 9.917644 | P | P | A | 7.76458  |

|          |          |          |          |   |   |   |          |
|----------|----------|----------|----------|---|---|---|----------|
| 9.872442 | 9.722902 | 9.151846 | 8.023938 | P | P | P | 9.079837 |
| 6.062221 |          | 7.208391 | 7.026352 |   | A | A | 4.520584 |
| 12.04712 | 12.02772 | 11.55304 | 11.11953 | P | P | P | 11.92457 |
| 7.335025 |          | 8.187421 | 8.890857 |   | A | P | 5.533272 |
| 9.04338  | 9.390835 | 10.52189 | 10.61675 | P | P | P | 9.781142 |
| 11.13849 | 10.64089 | 10.17738 | 10.90499 | P | P | P | 11.08498 |
| 10.89813 | 10.45795 | 11.08258 | 10.83257 | P | P | P | 10.16071 |
| 9.072297 | 9.487716 | 7.772613 | 7.536988 | P | P | P | 9.259988 |
| 6.786093 | 6.614794 | 7.271625 | 6.98105  | P | P | P | 7.099915 |
| 7.409918 | 7.536979 | 6.802523 | 6.858408 | P | P | P | 7.162511 |
| 7.431156 | 7.597062 | 6.962178 | 7.519761 | P | P | P | 7.505376 |
| 5.542801 |          |          | A        |   |   |   | 1.953819 |
| 9.740915 | 9.546497 | 8.28546  | 9.239972 | P | P | P | 9.90278  |
| 14.15052 | 14.83382 | 13.22591 | 12.93753 | P | P | P | 14.7584  |
| 10.34046 | 10.3362  | 13.02208 | 12.33312 | P | P | P | 9.738629 |
| 9.857445 | 9.856255 | 11.42239 | 11.35912 | P | P | P | 9.296026 |
| 5.544221 | 5.19556  |          | A        | A |   |   | 6.090294 |
| 6.725693 | 5.860705 | 6.712926 | 6.756802 | P | A | P | 6.098987 |
| 7.517732 | 4.708656 | 6.815578 | 7.119043 | P | P | A | 6.18422  |
| 12.21613 | 12.37884 | 11.23418 | 10.7044  | P | P | P | 12.24991 |
|          | 5.947728 | 5.022963 |          | A | A |   |          |
| 6.194945 | 6.544023 |          | 6.956209 | A |   | M | 6.169374 |
|          | 6.165107 |          |          | A |   |   |          |
| 6.611898 | 6.228086 | 5.805347 | 7.141393 | A | A | A | 6.900895 |
|          | 5.654439 | 7.091618 |          | A | A |   |          |
| 6.859946 |          | 6.460838 | 5.515403 |   | M | P | 4.432026 |
| 10.67153 | 9.423747 | 11.26694 | 11.00957 | P | P | P | 9.937967 |
|          | 6.212051 | 7.392827 |          | A | A |   |          |
| 8.399637 | 7.622163 | 8.765328 | 9.186105 | P | P | P | 8.372765 |
| 6.220743 | 3.541336 | 6.773677 | A        | P | P |   | 3.006642 |
| 12.54647 | 12.04903 | 11.44278 | 11.30612 | P | P | P | 12.10845 |
| 7.493588 | 5.670289 | 7.376633 | 6.985093 | P | P | P | 6.130073 |
| 7.393388 | 7.811877 | 6.616848 | 7.329312 | P | P | P | 9.160836 |
| 10.94457 | 11.05393 | 10.39642 | 10.78522 | P | P | P | 12.32415 |
| 10.00513 | 10.34065 | 9.606487 | 9.113009 | P | P | P | 10.78507 |
| 3.761691 |          |          | P        |   |   |   | 5.936899 |
| 7.608028 | 7.168734 | 7.883514 | 8.148029 | P | P | A | 7.245964 |
| 8.61823  | 7.672962 | 7.830092 | 7.540685 | P | P | P | 7.2912   |
| 7.062177 |          |          | A        |   |   |   | 2.744726 |
| 8.038979 | 5.312054 | 7.664944 | 7.739332 | P | A | P | 5.787229 |

|          |          |          |          |   |   |   |          |
|----------|----------|----------|----------|---|---|---|----------|
| 10.37898 | 10.07076 | 11.09207 | 11.13156 | P | P | P | 10.15171 |
| 9.896058 | 9.109377 | 11.15423 | 11.01165 | P | P | P | 9.233486 |
| 9.464183 | 8.935424 | 10.38364 | 9.680007 | P | P | P | 8.607386 |
| 7.176101 | 6.801026 | 7.340117 | 9.152162 | A | P | P | 7.724407 |
| 9.472837 | 10.75105 | 8.348638 | 7.709244 | P | P | P | 9.697376 |
| 11.89912 | 12.40325 | 11.74388 | 11.15318 | P | P | P | 12.063   |
| 8.249349 | 7.739929 | 7.691542 | 6.820155 | P | P | P | 7.183713 |
| 8.155534 | 7.525725 | 7.022836 | 7.040497 | P | P | P | 7.070169 |
| 10.18526 | 8.520972 | 9.983369 | 10.34156 | P | P | P | 9.499871 |
| 6.694179 |          | 6.750457 | 7.693993 |   | P | A | 6.423339 |
| 10.42975 | 9.00348  | 8.524159 | 8.666253 | P | P | P | 9.630924 |
| 9.530804 | 9.841481 | 9.123547 | 8.491591 | P | P | P | 9.471512 |
| 10.55907 | 10.77871 | 11.78447 | 11.31609 | P | P | P | 10.75264 |
| 13.10046 | 14.13551 | 11.13693 | 12.74198 | P | P | P | 13.86953 |
| 7.624797 | 7.98973  | 7.260676 | 6.889055 | P | P | P | 8.310917 |
|          | 6.095504 |          |          | P |   |   |          |
| 10.24303 | 10.08459 | 10.70876 | 11.06188 | P | P | P | 9.792243 |
| 9.56667  | 9.530885 | 9.016186 | 9.295386 | P | P | P | 9.562974 |
| 9.021921 | 7.976514 | 7.845569 | 7.585642 | P | P | P | 8.586427 |
| 8.573318 | 7.869711 | 7.272318 | 8.914273 | P | P | P | 7.89983  |
| 6.626791 | 7.396561 | 5.449861 | 6.127935 | P | P | P | 7.153503 |
| 6.962685 | 7.300008 | 6.690736 | 7.935223 | P | P | P | 7.943988 |
| 5.908163 | 5.211926 | 3.62514  | 6.91617  | P | M | P | 6.004148 |
| 8.090618 | 8.481885 | 8.557334 | 9.278176 | P | P | P | 9.319879 |
| 12.06174 | 12.10799 | 12.46797 | 13.18814 | P | P | P | 12.48167 |
|          | 5.063261 | 7.635601 | 7.740428 | A | A | A |          |
| 4.700053 | 2.879473 |          | 4.890051 | P |   | P | 5.0255   |
| 12.29151 | 13.31562 | 10.8188  | 10.64689 | P | P | P | 12.85252 |
|          | 6.488612 | 8.106912 | 6.794299 | P | A | P |          |
| 8.009228 | 7.396526 | 6.874875 | 7.222314 | P | P | A | 6.820463 |
| 8.112857 | 8.267069 | 8.499058 | 10.23621 | P | P | P | 9.186941 |
| 10.00796 | 10.38535 | 10.06457 | 9.319913 | P | P | P | 9.187322 |
| 11.28252 | 10.43305 | 11.26529 | 11.40135 | P | P | P | 10.5662  |
| 11.02149 | 10.28972 | 11.33557 | 11.57981 | P | P | P | 10.74289 |
| 7.444355 | 8.399366 | 6.904394 | 5.598075 | P | P | P | 7.431715 |
| 5.906641 | 4.897936 | 4.901682 |          | P | P |   | 5.4355   |
| 9.86139  | 9.960062 | 10.66905 | 11.8724  | P | P | P | 10.4375  |
| 6.777629 |          | 3.698331 | 6.170227 |   | P | P | 5.359009 |
| 12.41572 | 12.66142 | 13.55185 | 13.61754 | P | P | P | 12.93138 |
| 8.617664 | 7.874911 | 9.781521 | 9.913684 | P | P | P | 8.208967 |

|          |          |          |            |   |   |   |          |
|----------|----------|----------|------------|---|---|---|----------|
| 8.978859 | 8.603094 | 9.139178 | 9.41624 P  | P | P | P | 8.140201 |
| 5.825605 | 6.960338 | 6.737129 | 6.501583 P | P | P | P | 6.540866 |
| 8.859582 | 6.118858 | 5.799928 | 4.307031 P | P | P | P | 8.308089 |
| 9.490278 | 8.663411 | 11.94762 | 9.773877 P | A | A | M | 9.633613 |
| 10.56415 | 10.60909 | 11.23201 | 10.79384 P | P | P | P | 10.17816 |
| 9.132    | 8.905026 | 8.95623  | 8.226228 P | P | P | P | 8.783039 |
| 13.54925 | 13.73239 | 13.37365 | 13.21364 P | P | P | P | 13.53354 |
| 5.631089 | 6.157923 | 7.036724 | 6.453619 M | A | P | A | 4.988594 |
| 7.920528 | 7.008017 | 6.838073 | 6.943344 P | P | P | P | 8.169798 |
|          | 6.387775 |          |            | A |   |   |          |
| 9.440617 | 9.349283 | 8.42903  | 8.023242 P | P | P | P | 9.90454  |
| 9.577211 | 9.116762 | 9.648663 | 9.980979 P | P | P | P | 8.685532 |
| 9.77445  | 8.474443 | 9.084374 | 9.165179 P | P | P | P | 8.215777 |
| 10.56179 | 8.950719 | 8.448445 | 8.969918 P | P | P | P | 8.005594 |
| 9.926498 | 9.635426 | 8.94103  | 10.42076 P | P | P | P | 10.23098 |
| 9.368978 | 9.937284 | 9.559241 | 7.640521 P | P | P | P | 9.409284 |
| 6.384089 | 5.839584 |          | 7.347792 A | A |   | A | 6.407091 |
| 7.004915 | 8.80712  | 6.17883  | P          | A | P |   | 7.08661  |
| 6.614746 | 6.675095 | 6.621211 | 5.399394 A | A | P | M | 6.583602 |
|          | 3.21096  |          |            | P |   |   |          |
| 6.470838 | 5.602683 | 6.463315 | A          | P | A |   | 6.060823 |
| 9.35126  | 10.20161 | 9.333235 | 7.967098 P | P | P | P | 9.499523 |
| 6.447034 | 6.512064 | 5.076416 | 6.427207 P | P | P | P | 6.14153  |
| 7.340385 | 7.297108 | 8.784104 | 8.560681 P | P | P | P | 7.222911 |
| 6.097977 | 6.135976 | 7.107057 | A          | A | A |   | 6.639547 |
| 9.100425 | 8.966213 | 10.27167 | 11.38795 P | P | P | P | 9.295548 |
| 8.267949 | 8.243156 | 9.625572 | 9.055553 P | P | P | P | 8.393398 |
| 7.618989 | 8.909679 | 9.443695 | 9.174143 P | P | P | P | 8.006988 |
| 7.102745 | 6.489339 | 6.645202 | 6.885259 A | P | P | A | 5.713191 |
| 9.285259 | 10.2287  | 9.105858 | 8.772816 P | P | P | P | 10.10593 |
| 6.060336 | 5.239239 | 5.923285 | 5.851673 P | M | P | A | 6.202379 |
|          |          | 6.058262 | 7.120429   |   | A | A |          |
| 6.854408 | 6.548581 | 8.950949 | 9.450172 P | P | P | P | 7.36673  |
| 12.3459  | 13.65004 | 11.92668 | 11.21418 P | P | P | P | 13.47926 |
| 6.631778 | 7.153432 | 6.61727  | 5.270788 P | P | P | P | 6.408841 |
| 8.025775 | 8.035665 | 9.350025 | 9.042987 P | P | P | P | 7.388987 |
| 6.030079 | 6.149537 | 5.034226 | 6.124522 P | P | P | P | 7.047304 |
|          |          | 7.651472 | 8.991948   |   | A | A |          |
| 11.97764 | 12.57227 | 11.62617 | 11.29853 P | P | P | P | 12.34277 |
| 9.932466 | 9.663856 | 10.293   | 10.32459 P | P | P | P | 9.151591 |

|          |          |          |            |   |   |   |          |
|----------|----------|----------|------------|---|---|---|----------|
| 9.961957 | 9.879362 | 9.82514  | 9.038051 P | P | P | P | 10.20215 |
| 13.18941 | 12.42605 | 14.03069 | 14.37009 P | P | P | P | 12.16247 |
| 6.333754 | 5.498548 | 5.37423  | 6.098829 A | P | P | P | 5.059116 |
|          |          | 6.399293 |            |   | A |   |          |
| 6.805331 | 7.600781 | 5.02901  | 5.701373 P | P | P | P | 6.955223 |
| 8.009624 | 6.999977 | 6.628113 | 6.215072 P | P | P | P | 6.373457 |
| 7.708685 | 7.692388 | 8.80321  | 9.102617 P | P | P | P | 7.403303 |
| 10.5269  | 10.42189 | 10.33792 | 9.025977 P | P | P | P | 10.3836  |
| 7.470387 | 7.142357 | 5.672251 | 6.585321 A | A | P | P | 6.504829 |
| 8.428494 | 8.914926 | 7.517475 | 6.570563 P | P | P | P | 8.145803 |
| 11.27107 | 10.25983 | 10.97458 | 10.37956 P | P | P | P | 10.1     |
| 9.260987 | 8.949281 | 9.038818 | 7.245056 P | P | P | P | 8.319562 |
| 8.008401 | 7.196748 | 7.422424 | 6.38443 P  | P | P | P | 7.89204  |
| 7.336709 | 6.316307 | 7.839575 | 7.641882 P | P | P | P | 6.696064 |
| 8.024823 | 7.356402 | 7.462413 | A          | P | M |   | 6.039002 |
|          | 5.290737 |          |            | A |   |   |          |
| 8.390598 | 8.509532 | 9.292162 | 9.207073 M | P | P | P | 8.001907 |
| 8.964852 | 8.419227 | 9.56685  | 9.317979 P | P | P | P | 8.256577 |
| 8.128213 | 8.75713  | 7.365549 | 6.755572 P | P | P | P | 7.578164 |
| 6.053381 | 5.963723 | 5.978866 | A          | P | P |   | 5.504643 |
| 7.784546 | 6.413313 | 7.267808 | 8.175128 P | P | P | P | 7.224549 |
| 7.223887 | 7.472728 | 4.12219  | 6.694504 P | P | P | P | 7.502518 |
| 7.159652 | 7.215617 | 5.628311 | 5.98047 P  | P | P | P | 6.963727 |
| 9.163649 | 8.495427 | 8.842812 | 9.05041 P  | P | P | P | 7.989821 |
| 6.823985 | 6.2268   | 7.505622 | 7.371366 A | A | A | A | 6.02158  |
| 10.55739 | 10.76287 | 10.34101 | 8.929362 P | P | P | P | 10.3806  |
| 8.696161 | 9.412037 | 8.515513 | 7.941714 P | P | P | P | 8.951504 |
| 10.05287 | 9.354187 | 8.336839 | 8.686326 P | P | P | P | 9.028996 |
|          |          |          | 6.351865   |   |   | A |          |
| 8.780152 | 10.03559 | 9.666529 | 9.064566 P | P | P | P | 9.715979 |
| 7.064693 | 6.897558 |          | 7.194315 A | P |   | A | 6.337183 |
| 6.105957 | 5.533798 | 5.639167 | 6.646911 P | P | P | P | 7.163251 |
|          |          | 7.012609 |            |   | A |   |          |
| 4.896369 | 6.093627 | 6.155942 | 5.694443 P | P | P | P | 6.447587 |
| 4.474219 | 6.800498 | 7.057274 | 6.441369 P | P | P | P | 7.767529 |
| 6.912563 | 5.17007  | 6.996333 | 1.405545 A | A | A | P | 5.61714  |
| 8.442633 | 9.335916 | 8.529542 | 8.920224 P | P | P | A | 9.300488 |
| 10.47736 | 8.855311 | 9.555129 | 9.633864 P | P | P | P | 8.980789 |
|          |          | 1.42836  |            |   | M |   |          |
| 10.44052 | 10.58698 | 8.38586  | 9.639244 P | P | P | P | 10.5471  |

|          |          |          |          |   |   |   |          |
|----------|----------|----------|----------|---|---|---|----------|
| 6.567845 | 6.211244 | 7.073788 | 4.473017 | P | P | M | 7.010471 |
| 7.486767 | 7.872418 | 6.877989 | 7.626324 | P | P | P | 6.310041 |
|          | 5.754841 | 5.25984  | 6.650157 | A | P | A |          |
| 7.98292  | 7.735732 | 8.826306 | 8.539989 | P | P | P | 7.453667 |
| 9.76131  | 10.23336 | 10.38075 | 10.71177 | P | P | P | 9.564389 |
| 5.862371 | 6.044056 | 4.235962 | 7.629427 | P | P | P | 6.515729 |
| 7.370982 | 7.344988 | 7.773079 | 6.937627 | P | P | M | 7.470811 |
|          |          | 7.95284  | 8.307836 |   | A | A |          |
| 10.74292 | 8.736687 | 9.420184 | 9.495981 | P | P | P | 8.975116 |
| 6.942085 |          | 4.483274 | A        |   | P |   | 4.742917 |
| 5.594345 | 6.383828 | 6.3005   | 7.082983 | A | P | M | 6.597852 |
| 14.35418 | 14.71741 | 15.2395  | 14.81201 | P | P | P | 14.8903  |
| 12.20985 | 12.94574 | 12.01446 | 11.80178 | P | P | P | 12.96385 |
| 10.27196 | 10.4972  | 9.928341 | 10.09129 | P | P | P | 10.62085 |
| 5.201798 |          | 5.37593  | P        |   | P |   | 6.247311 |
| 11.23866 | 11.84708 | 12.85718 | 13.52883 | P | P | P | 10.81063 |
| 10.27756 | 9.381518 | 10.08547 | 10.58885 | P | A | P | 10.37363 |
| 9.459665 | 8.901405 | 10.1624  | 9.579547 | P | P | P | 8.820268 |
| 12.73583 | 12.88393 | 12.30894 | 12.03053 | P | P | P | 13.16458 |
| 9.341485 | 10.13312 | 9.350245 | 8.689074 | P | P | P | 9.786919 |
| 13.16193 | 14.01956 | 12.81772 | 12.35229 | P | P | P | 13.83959 |
| 12.11887 | 13.44206 | 13.13251 | 12.24094 | P | P | P | 13.62187 |
| 10.15494 | 11.12632 | 10.48518 | 9.207956 | P | P | P | 10.37636 |
| 11.72562 | 12.05832 | 11.40248 | 10.51956 | P | P | P | 11.83893 |
| 11.54908 | 10.92528 | 11.98638 | 12.10274 | P | P | P | 10.79964 |
| 11.88141 | 11.33416 | 12.26749 | 12.44385 | P | P | P | 11.34    |
| 10.41921 | 10.65875 | 9.138208 | 8.821437 | P | P | P | 10.35865 |
| 7.968942 | 6.687449 | 7.794227 | 8.766276 | P | P | P | 7.90251  |
| 7.429288 | 8.350652 | 6.449361 | 7.243507 | P | P | P | 10.18708 |
| 12.41882 | 11.34578 | 12.34442 | 12.17009 | P | P | P | 11.9853  |
| 6.050942 | 6.143474 |          | A        | A |   |   | 5.987905 |
| 7.571363 | 7.272662 | 7.657429 | 7.801326 | P | P | A | 7.387688 |
| 11.07958 | 10.81935 | 11.71172 | 11.07085 | P | P | P | 10.95717 |
| 10.65348 | 9.773496 | 10.86913 | 10.0869  | P | P | P | 9.556603 |
| 9.203617 | 8.75972  | 9.29407  | 9.085168 | P | P | P | 8.16836  |
| 3.336811 |          |          | M        |   |   |   | 5.744054 |
| 5.452021 |          | 5.410752 | P        |   | P |   | 6.599089 |
|          |          |          | 7.106542 |   |   | A |          |
| 7.295966 | 6.340703 | 6.032108 | 6.53637  | P | P | P | 7.31651  |
|          | 5.652809 | 5.815607 | 6.794687 | M | P | P |          |

|          |          |          |          |   |   |   |          |
|----------|----------|----------|----------|---|---|---|----------|
| 9.577476 | 9.530788 | 9.666538 | 9.376961 | P | P | P | 9.438259 |
| 5.857517 | 0.624957 | 5.817168 | P        | M | M |   | 6.128354 |
| 11.00621 | 10.07694 | 10.09593 | 9.603029 | P | P | P | 9.624547 |
| 5.689417 |          | 6.673135 | 7.386358 | P | A | M | 7.235806 |
| 6.910525 |          | 8.395436 | A        |   | P |   | 6.915323 |
| 8.20966  | 8.201679 | 8.591035 | 8.353107 | P | P | P | 8.465612 |
| 8.622692 | 8.831897 | 8.814483 | 8.136737 | P | P | P | 7.880171 |
| 8.468857 | 7.936303 | 8.408599 | 8.311045 | P | P | P | 8.728492 |
| 8.868904 | 7.542701 | 8.021425 | 7.453474 | P | P | P | 7.764109 |
| 10.52562 | 8.099343 | 7.892774 | 8.874049 | P | P | P | 8.07982  |
| 10.63927 | 8.306124 | 8.398587 | 9.371368 | P | P | P | 8.271454 |
| 10.35173 | 8.374329 | 8.723705 | 9.254501 | A | P | P | 7.142746 |
| 10.43614 | 8.137174 | 7.541753 | 8.952519 | A | P | P | 6.975262 |
| 10.82263 | 9.025958 | 8.975834 | 9.897113 | P | P | P | 8.513865 |
| 8.940976 | 7.896817 | 9.826858 | 8.616946 | P | P | P | 6.900991 |
| 4.722964 | 0.442123 |          | P        | P |   |   | 4.887601 |
| 9.783748 | 9.554653 | 10.68497 | 11.39502 | P | P | P | 10.2473  |
|          | 6.436991 |          | 4.611378 | P |   | P |          |
| 13.14879 | 12.34052 | 13.98274 | 15.04749 | P | P | P | 12.76736 |
| 11.1138  | 10.9842  | 12.48364 | 13.27373 | P | P | P | 11.17423 |
| 11.52459 | 12.13954 | 11.18765 | 10.06895 | P | P | P | 11.55036 |
|          |          | 8.492551 | 8.906101 |   | A | A |          |
| 8.630556 | 8.011532 | 7.45108  | 7.329172 | P | P | P | 7.675036 |
| 7.139437 |          |          | 7.131638 | A |   | P | 6.647204 |
| 2.529463 |          | 5.11343  | 3.077708 | P | M | P | 6.381895 |
|          |          | 3.787364 |          |   | P |   |          |
|          | 5.596494 |          | 4.104155 | P |   | P |          |
| 10.75417 | 11.16751 | 10.41739 | 9.578155 | P | P | P | 10.5257  |
|          | 5.934753 |          | 7.311765 | A |   | P |          |
| 11.88593 | 11.75382 | 12.73158 | 13.0005  | P | P | P | 11.9137  |
| 8.128141 | 7.567013 | 8.942187 | 9.227717 | P | P | P | 8.506983 |
| 8.499079 |          | 8.82068  | 9.84687  | A | A | A | 7.212523 |
| 14.52718 | 14.76623 | 14.39642 | 13.6794  | P | P | P | 14.67491 |
| 8.484982 | 8.35789  | 8.120731 | 7.953413 | P | P | P | 6.809562 |
| 9.803484 | 8.867737 | 10.05508 | 9.534866 | P | P | P | 9.190028 |
| 6.37919  |          | 6.413891 | 6.247588 | A | A | A | 5.470881 |
| 7.604682 | 8.245283 | 7.658838 | 9.069779 | P | P | A | 1.928632 |
| 11.2099  | 11.22433 | 12.10302 | 11.42046 | P | P | P | 11.01519 |
| 7.196258 | 6.958089 | 5.671635 | 3.821758 | P | P | M | 7.244551 |
| 8.171883 | 8.39002  | 6.959023 | 7.106371 | P | P | P | 8.042344 |

|          |          |          |          |   |   |   |          |
|----------|----------|----------|----------|---|---|---|----------|
| 8.236384 | 7.034251 | 8.831211 | 8.093746 | P | P | P | 8.152752 |
| 6.051435 | 5.738944 | 6.250803 | 7.405468 | P | P | P | 6.098744 |
| 7.621052 | 6.484993 | 7.494445 | 7.715888 | A | M | P | 5.046065 |
| 11.24003 | 11.34559 | 9.992974 | 9.896379 | P | P | P | 10.73014 |
| 11.2901  | 12.11806 | 11.23655 | 10.4609  | P | P | P | 11.87455 |
| 11.50362 | 11.77993 | 14.06892 | 15.01877 | P | P | P | 12.39653 |
| 9.487291 | 8.726375 | 9.669127 | 9.206264 | P | P | P | 8.632937 |
| 8.039224 | 7.01873  | 7.747862 | P        | M | P |   | 7.744991 |
| 9.300735 | 10.38175 | 10.65692 | 10.26094 | P | P | P | 9.822157 |
| 7.361021 | 5.152093 | 6.315695 | 2.900765 | P | P | P | 6.922911 |
| 6.789468 | 6.108779 | 5.246833 | 5.786019 | P | P | P | 6.898065 |
| 7.699099 | 8.835489 | 9.993403 | 8.980085 | P | P | P | 9.031799 |
| 9.127019 | 8.699776 | 8.979754 | 9.438723 | P | P | P | 9.62639  |
| 8.966572 | 8.774269 | 9.365661 | 8.90239  | P | P | P | 9.251047 |
| 8.55934  | 9.255749 | 9.923827 | 9.729935 | P | P | P | 9.239116 |
| 5.193092 |          |          | 6.155315 |   |   | A | 6.48624  |
| 14.56758 | 14.98282 | 12.47165 | 13.4799  | P | P | P | 15.0475  |
| 8.387919 | 8.205465 | 8.012263 | 8.792885 | P | P | P | 8.28799  |
| 11.67884 | 11.33787 | 11.3618  | 11.16399 | P | P | P | 10.92458 |
| 8.640056 | 7.803173 | 8.240759 | 8.978977 | P | P | P | 8.199638 |
| 8.176165 | 9.06594  | 6.07285  | 6.425857 | P | P | P | 8.661161 |
| 7.279422 | 8.620303 | 5.751231 | 3.840238 | P | P | P | 7.915099 |
| 7.423786 | 8.076464 | 6.227531 | 5.932594 | P | P | P | 7.609377 |
| 10.39739 | 9.254647 | 10.79565 | 10.82635 | P | P | P | 8.726945 |
|          | 7.560407 | 8.223961 | 8.446813 | A | P | P |          |
|          |          |          | 7.451373 |   |   | A |          |
| 8.43111  | 8.160405 | 9.510617 | 10.24676 | P | A | P | 8.067688 |
| 6.536641 | 5.880318 | 7.089982 | 7.934678 | A | A | A | 6.443577 |
| 6.679274 | 7.480144 | 6.218412 | 6.915882 | P | P | P | 7.389805 |
| 9.441648 | 9.103832 | 7.977166 | 7.361851 | P | P | P | 8.426177 |
| 9.070835 | 9.815394 | 9.611794 | 8.727942 | P | P | P | 9.852564 |
| 6.616389 | 6.7244   | 7.086669 | 6.875353 | P | P | A | 6.200621 |
|          |          | 6.047804 |          |   | A |   |          |
| 9.958295 | 9.623374 | 10.94218 | 10.82793 | P | P | P | 9.435994 |
| 6.892005 | 6.324468 | 6.578681 | 7.5941   | P | P | A | 7.962964 |
| 11.39625 | 11.59715 | 10.57912 | 10.67552 | P | P | P | 11.50185 |
| 6.479549 | 5.969183 | 7.191422 | 6.754442 | P | P | A | 5.887576 |
| 10.26625 | 9.713882 | 9.806236 | 11.28697 | P | P | P | 9.292473 |
| 7.439964 | 7.577344 | 9.194136 | 8.087178 | P | P | A | 6.793395 |
|          |          |          | 6.293632 |   |   | A |          |



|          |          |          |            |   |   |   |          |
|----------|----------|----------|------------|---|---|---|----------|
| 11.09133 | 11.53599 | 12.4818  | 11.86661 P | P | P | P | 11.61474 |
| 7.596821 | 8.792039 | 8.249169 | P          | P | P |   | 8.225175 |
| 5.806224 | 4.877692 | 5.33798  | 4.008767 A | P | P | P | 4.360615 |
| 10.18035 | 9.650186 | 9.069017 | 9.017995 P | P | P | P | 9.835852 |
| 11.42981 | 11.95125 | 11.04989 | 10.17374 P | P | P | P | 11.63165 |
| 8.000643 | 9.459302 | 9.059301 | 7.574372 P | P | P | P | 8.782671 |
| 13.63199 | 13.65672 | 14.24447 | 14.64131 P | P | P | P | 13.75315 |
| 8.959663 |          | 8.936196 | A          |   | A |   | 6.89397  |
| 9.747066 | 7.836096 | 9.458816 | 9.561307 P | P | P | P | 7.627867 |
|          | 6.415623 | 6.317918 |            | P | P |   |          |
| 9.61871  | 9.038657 | 10.40557 | 10.79016 P | P | P | P | 9.607371 |
| 6.659381 | 6.914538 | 7.221562 | 7.847049 P | M | A | A | 6.797396 |
| 11.01587 | 12.26087 | 11.16537 | 9.584668 P | P | P | P | 11.57213 |
| 11.19113 | 9.809902 | 11.24048 | 11.49812 P | P | P | P | 10.0571  |
| 10.53764 | 10.70571 | 11.05496 | 11.46915 P | P | P | P | 10.66616 |
| 11.11417 | 11.25289 | 12.95695 | 12.79762 P | P | P | P | 10.83821 |
| 5.82696  | 6.33437  | 4.964585 | 5.482045 P | P | P | P | 5.966914 |
| 13.48161 | 13.61142 | 13.30848 | 12.48795 P | P | P | P | 13.42661 |
| 12.66438 | 12.00724 | 12.79536 | 12.31503 P | P | P | P | 11.86836 |
|          |          | 1.809283 |            |   |   | P |          |
| 10.92165 | 9.854362 | 10.27243 | 10.15403 P | P | P | P | 9.913368 |
| 14.93649 | 15.17447 | 15.94753 | 16.30714 P | P | P | P | 15.08887 |
| 14.13061 | 14.52548 | 15.30191 | 15.48718 P | P | P | P | 14.28533 |
| 15.54163 | 15.55885 | 16.02072 | 16.93509 P | P | P | P | 15.64403 |
| 11.66668 | 12.4599  | 11.22286 | 10.37733 P | P | P | P | 11.48318 |
| 9.592191 | 9.190738 | 9.841091 | 9.589681 P | P | P | P | 8.567013 |
| 14.09526 | 13.79546 | 14.47931 | 14.76427 P | P | P | P | 13.82883 |
| 8.843331 | 7.514541 | 8.72198  | 8.580579 A | A | A | A | 3.37601  |
| 12.23186 | 11.88322 | 12.80357 | 13.42026 P | P | P | P | 11.52869 |
| 12.51091 | 13.23789 | 13.19635 | 12.6264 P  | P | P | P | 12.85932 |
| 7.241778 | 6.363825 | 6.860135 | 6.698891 P | P | P | P | 8.353337 |
|          | 6.718899 |          |            | A |   |   |          |
| 11.30541 | 10.31507 | 10.67922 | 10.91592 P | P | P | P | 10.84478 |
| 12.17765 | 13.7313  | 13.23311 | 13.47291 P | M | P | A | 13.39905 |
| 8.136801 | 8.597317 | 6.945579 | 6.625032 P | P | P | P | 8.655029 |
| 7.387275 | 8.041726 | 7.739878 | 6.645059 P | P | P | P | 8.010444 |
|          | 5.234821 | 6.14507  |            | A | A |   |          |
| 5.862215 | 5.488877 | 6.112799 | 6.707649 P | P | P | P | 5.993597 |
| 6.657201 | 7.849244 | 7.466188 | 5.345715 P | P | P | P | 7.39019  |
| 9.699066 | 8.612167 | 9.147945 | 9.076382 P | P | P | P | 8.499069 |

|          |          |          |          |   |   |   |          |
|----------|----------|----------|----------|---|---|---|----------|
| 10.52296 | 9.207433 | 10.72975 | 10.10618 | P | P | P | 9.258108 |
| 8.355982 | 7.625763 | 9.091953 | 8.689773 | P | P | P | 9.375332 |
| 5.000206 | 6.086086 | 6.405197 | A        | A | A |   | 3.939456 |
| 12.58059 | 13.79888 | 13.14092 | 12.71615 | P | P | P | 13.55824 |
| 8.044395 | 8.770483 | 7.674294 | 7.252588 | P | P | P | 7.892018 |
| 10.78598 | 10.29554 | 11.54176 | 12.0624  | P | P | P | 10.9139  |
| 12.9023  | 14.42566 | 13.33577 | 14.51289 | P | P | P | 13.89595 |
| 9.380968 | 10.1152  | 8.245018 | 7.756379 | P | P | P | 9.660275 |
| 6.611426 |          |          | 7.09428  |   |   | P | 6.707469 |
|          |          | 3.046041 |          |   | P |   |          |
| 10.10494 | 9.332422 | 9.909983 | 10.13818 | P | P | P | 9.35589  |
| 12.26643 | 11.80021 | 11.48717 | 11.20867 | P | P | P | 11.78514 |
| 13.47783 | 13.47941 | 12.84919 | 12.62336 | P | P | P | 13.5742  |
| 8.180795 | 7.920091 | 7.871882 | 7.299288 | P | P | P | 7.03472  |
| 9.937198 | 9.200992 | 9.919759 | 9.254915 | P | P | P | 8.925664 |
| 5.545082 | 5.422135 | 2.914632 | 5.380884 | P | P | P | 6.509483 |
| 7.198065 | 6.90674  | 6.985156 | 6.900444 | P | P | P | 6.880586 |
| 6.063001 | 6.148262 | 4.180083 | A        | P | P |   | 5.79298  |
| 10.57712 | 10.87291 | 10.67585 | 10.03727 | P | P | P | 10.32022 |
| 11.38521 | 11.67656 | 10.61411 | 10.16071 | P | P | P | 11.14806 |
| 12.09633 | 11.04699 | 12.35726 | 12.64505 | P | P | P | 11.64418 |
| 6.376627 | 7.180059 | 1.931001 | A        | P | P |   | 7.024178 |
| 10.31053 | 9.894071 | 10.55653 | 11.38465 | P | P | P | 9.969744 |
| 7.596191 | 6.708422 |          | 8.573333 | P |   | P | 7.308492 |
| 10.59692 | 11.60942 | 10.12536 | 9.452184 | P | P | P | 11.20788 |
| 6.993575 | 8.681191 | 7.825796 | 7.058718 | P | P | M | 8.096442 |
| 10.29057 | 10.90171 | 10.05361 | 9.154628 | P | P | P | 10.63938 |
| 7.100707 | 7.437423 | 8.694846 | 8.822646 | P | P | A | 7.229067 |
| 8.071075 | 9.107299 | 9.070754 | 9.119057 | P | P | P | 9.237292 |
| 8.208513 | 7.958057 | 8.099387 | 8.482128 | P | P | P | 9.376134 |
| 12.09194 | 12.23071 | 10.17424 | 10.19135 | P | P | P | 12.30856 |
| 9.879615 | 10.71494 | 8.479554 | 7.951332 | P | P | P | 9.807602 |
| 7.923592 | 9.936271 | 8.666827 | 8.801107 | P | P | P | 9.509043 |
| 11.03775 | 11.15009 | 11.81295 | 13.14907 | P | P | P | 10.93432 |
| 5.995932 | 5.682278 | 6.169098 | 7.971236 | P | P | P | 7.025504 |
| 7.955123 | 6.726731 | 8.350896 | 7.975232 | A | P | P | 6.590059 |
| 8.633768 | 9.049978 | 8.318129 | 8.613135 | P | P | P | 8.689244 |
| 10.53579 | 10.57392 | 11.48039 | 11.52058 | P | P | P | 10.66963 |
| 5.118437 |          | 7.035782 | P        |   | A |   | 6.213906 |
| 7.982523 | 7.705992 | 8.390799 | 8.32366  | P | M | P | 7.858939 |

|          |          |          |          |   |   |   |          |
|----------|----------|----------|----------|---|---|---|----------|
| 9.080533 | 9.574487 | 10.13314 | 10.68593 | P | P | P | 9.666995 |
| 5.973892 | 5.437467 | 5.266344 | 4.556471 | P | M | P | 6.119755 |
| 9.600092 | 8.655236 | 9.460868 | 10.19926 | P | P | P | 9.013699 |
| 6.645798 | 6.88533  | 6.125551 | 4.156036 | P | P | P | 6.476371 |
| 7.324179 | 7.082503 | 8.135878 | 7.158696 | P | P | P | 7.265881 |
| 10.0073  | 10.46347 | 10.31055 | 11.28696 | P | P | P | 9.406709 |
|          |          | 7.235688 | 8.13229  |   | A | A |          |
| 7.501199 | 7.020352 | 7.060038 | 6.088758 | P | P | P | 7.265018 |
| 8.804887 | 8.594212 | 7.80436  | 8.156027 | P | P | P | 7.144953 |
| 7.707964 | 6.775695 | 7.438807 | 8.426453 | P | P | P | 7.167035 |
|          | 5.213447 |          | 6.452603 | A |   | A |          |
| 11.12083 | 11.57878 | 11.61948 | 12.60578 | P | P | P | 11.84084 |
| 11.97759 | 12.28153 | 11.41088 | 10.87379 | P | P | P | 11.80967 |
| 14.54476 | 14.83455 | 14.00638 | 13.49307 | P | P | P | 14.70386 |
| 10.03664 | 10.0519  | 9.595227 | 9.274069 | P | P | P | 10.00798 |
|          |          | 5.857025 |          |   | A |   |          |
| 5.548592 |          |          | A        |   |   |   | 3.037996 |
| 6.580474 | 6.282096 |          | 7.311767 | A |   | A | 6.539799 |
| 6.758854 | 6.560209 | 5.981317 | 5.882299 | P | P | P | 6.677123 |
| 10.85803 | 11.29085 | 11.59252 | 12.46301 | P | P | P | 11.51951 |
| 10.66578 | 11.273   | 11.37538 | 11.74549 | P | P | P | 11.33088 |
|          |          |          | 6.418856 |   |   | P |          |
| 9.391222 | 9.032234 | 11.99068 | 11.21726 | A | A | M | 8.897645 |
| 8.516588 | 8.584618 | 11.17754 | 10.24397 | A | A | A | 8.097434 |
| 11.17347 | 11.40596 | 11.65776 | 11.47623 | P | P | P | 11.20409 |
| 11.0547  | 10.77914 | 9.306885 | 9.059813 | P | P | P | 11.05466 |
| 10.64899 | 10.60046 | 11.45882 | 11.88595 | P | P | P | 10.92432 |
|          |          | 6.107112 |          |   | A |   |          |
| 3.696651 |          | 5.568559 | P        |   | A |   | 5.292888 |
| 9.190935 | 9.28948  | 9.706019 | 10.77511 | P | P | P | 9.90402  |
| 9.760607 | 10.1032  | 8.643998 | 8.465767 | P | P | P | 9.797246 |
| 9.154593 | 9.725565 | 8.104287 | 8.339109 | P | P | P | 9.75188  |
| 7.848184 | 7.217415 | 7.674974 | 7.808852 | P | P | P | 7.567228 |
| 12.55792 | 12.55395 | 12.75375 | 14.06596 | P | P | P | 12.92032 |
| 12.0484  | 12.37719 | 12.58299 | 13.62478 | P | P | P | 12.56226 |
| 7.543446 | 8.208472 | 7.522275 | 5.779433 | P | P | P | 7.422421 |
| 9.854734 | 8.537524 | 8.999288 | 8.5787   | P | P | P | 8.372841 |
| 6.373437 | 6.529948 | 6.337189 | 6.521524 | P | P | P | 6.300676 |
|          | 1.256763 | 5.266388 |          | P | P |   |          |
| 5.350636 |          |          | A        |   |   |   | 1.298705 |

|          |          |          |          |   |   |   |          |
|----------|----------|----------|----------|---|---|---|----------|
| 9.783093 | 9.646318 | 10.19001 | 11.11658 | P | P | P | 9.665058 |
| 7.85706  | 7.50761  | 7.936471 | P        | P | P |   | 6.457498 |
| 10.28123 | 9.360765 | 9.459478 | 8.505981 | P | P | P | 8.907722 |
| 7.238563 | 8.797963 | 8.351056 | 6.509358 | P | P | P | 8.393675 |
| 11.00271 | 12.21212 | 11.72586 | 11.17903 | P | P | P | 12.23235 |
| 10.72563 | 10.46543 | 10.55132 | 11.84119 | P | P | P | 10.5162  |
| 6.016141 | 5.906567 | 6.006521 | A        | A | P |   | 5.691995 |
| 12.47141 | 12.07059 | 12.07715 | 11.6992  | P | P | P | 12.04642 |
| 5.047422 | 4.066578 |          | 6.176201 | P |   | A | 6.028078 |
| 11.8891  | 11.56819 | 11.37044 | 10.42116 | P | P | P | 11.32799 |
| 8.208736 | 8.752119 | 8.675454 | 7.230916 | P | P | P | 8.269196 |
| 12.92592 | 12.13308 | 12.50535 | 11.91001 | P | P | P | 11.75475 |
| 8.719378 | 9.357285 | 8.152515 | 8.169662 | P | P | P | 9.467266 |
| 6.49024  | 8.278101 | 8.028305 | 7.675068 | P | P | P | 8.554156 |
| 8.314477 | 8.173136 | 7.332855 | 6.977659 | P | P | P | 7.631057 |
| 12.87655 | 11.60036 | 14.97909 | 14.6981  | P | P | P | 11.33448 |
| 13.30892 | 12.31103 | 15.09346 | 15.21085 | P | P | P | 11.78663 |
| 5.693541 | 5.285505 |          | A        | P |   |   | 4.453478 |
| 12.98324 | 13.32513 | 12.49525 | 11.92222 | P | P | P | 13.00797 |
| 8.501047 | 8.512865 | 7.241173 | 6.807907 | P | P | P | 8.339485 |
| 10.26461 | 9.854025 | 11.41333 | 11.35829 | P | P | P | 10.15796 |
| 9.06256  | 9.297746 | 9.681144 | 8.637514 | P | P | P | 7.937709 |
| 10.72827 | 8.704127 | 9.529964 | 9.82449  | P | P | P | 9.904304 |
| 9.35333  | 8.945505 | 9.042962 | 8.315064 | P | P | P | 8.99088  |
| 6.973933 | 6.340108 | 7.082775 | 6.999402 | P | P | A | 6.590284 |
| 10.48933 | 11.03904 | 9.21597  | 9.018039 | P | P | P | 10.4916  |
| 7.922974 | 8.514376 | 6.559816 | 7.071382 | P | P | P | 7.931878 |
| 6.415282 | 6.450675 | 3.862491 | 4.088307 | A | P | P | 6.548901 |
| 7.598249 | 8.22294  | 8.337737 | 8.847769 | P | P | P | 8.085838 |
| 10.94248 | 10.57394 | 10.47126 | 9.971886 | P | P | P | 10.41131 |
| 12.26855 | 13.18195 | 12.6537  | 11.87265 | P | P | P | 12.85711 |
| 5.311312 | 4.595058 | 5.210362 | 4.568287 | M | P | P | 5.527497 |
| 12.07388 | 12.02679 | 11.8031  | 10.82373 | P | P | P | 12.05205 |
|          | 5.237119 | 2.91575  |          | A | P |   |          |
| 8.374711 | 8.965542 | 10.96663 | 10.97017 | P | P | P | 8.096236 |
|          | 4.699991 |          |          | A |   |   |          |
| 8.949971 | 9.478764 | 8.535273 | 7.732355 | P | P | P | 8.712389 |
| 14.16085 | 13.75986 | 12.43059 | 13.92257 | P | P | P | 14.46497 |
|          |          | 1.086776 |          |   | P |   |          |
| 7.27929  | 7.148947 | 8.968146 | 8.824484 | P | P | A | 7.252331 |

|          |          |          |          |   |   |   |   |          |
|----------|----------|----------|----------|---|---|---|---|----------|
| 5.942803 | 6.379138 | 7.751297 | 6.233917 | A | P | P | P | 5.015283 |
| 10.62942 | 10.28099 | 11.11329 | 11.45115 | P | P | P | P | 10.32279 |
| 6.13779  | 7.455099 | 7.243616 | 7.404339 | P | P | P | P | 6.706867 |
| 5.858527 | 6.921619 | 6.502167 |          | A | P | P |   | 7.104701 |
| 11.6465  | 11.71925 | 10.41783 | 10.32619 | P | P | P | P | 11.50214 |
| 6.893515 | 7.707994 | 6.860803 | 6.294939 | P | P | P | P | 7.136483 |
| 11.43522 | 12.45462 | 11.18074 | 10.77886 | P | P | P | P | 11.99574 |
| 6.634826 | 6.968383 | 6.500944 | 7.310668 | P | P | P | P | 7.672323 |
| 12.95019 | 13.20847 | 11.66877 | 11.46761 | P | P | P | P | 13.31114 |
| 7.673723 | 6.91702  | 5.632641 | 5.843714 | P | P | P | P | 7.50474  |
| 8.271797 | 8.218043 | 8.85882  | 7.956085 | P | P | P | P | 7.922239 |
|          |          | 3.873013 | 5.187137 |   |   | M | P |          |
| 11.27103 | 10.77819 | 10.80825 | 11.35805 | P | P | P | P | 11.59251 |
| 12.18478 | 11.59403 | 12.88098 | 13.10365 | P | P | P | P | 11.54979 |
| 5.17595  |          | 4.926133 | 6.942356 | A |   | P | A | 3.755149 |
| 8.135554 | 8.304241 | 7.929156 | 7.278637 | P | P | P | P | 8.436076 |
|          |          | 6.220064 |          |   |   | P |   |          |
| 8.958665 | 8.980627 | 9.515171 | 9.252563 | P | P | P | P | 8.806203 |
|          | 6.759051 |          |          | A |   |   |   |          |
| 5.346115 | 3.901529 |          | P        | P |   |   |   | 5.885651 |
|          | 5.393174 | 3.339893 | 6.825597 | A | P | A |   |          |
| 6.883669 | 6.829928 | 7.077134 | 5.79601  | P | P | P | P | 6.735259 |
|          |          |          | 4.120773 |   |   |   | P |          |
| 12.07621 | 11.1656  | 9.213136 | 10.75411 | A | P | P | P | 1.443144 |
| 8.204745 | 8.363867 | 8.03563  | 7.887175 | P | P | P | P | 7.922825 |
| 12.26187 | 12.26992 | 11.79376 | 10.0332  | P | P | P | P | 12.66001 |
| 9.733266 | 8.762352 | 10.9726  | 11.25901 | P | P | P | P | 8.805869 |
|          | 5.758172 | 6.44293  | 6.648727 | A | P | A |   |          |
| 7.451244 | 7.901525 | 8.197015 | 8.245664 | M | P | P | P | 6.928302 |
| 14.64218 | 14.08424 | 15.28728 | 15.84927 | P | P | P | P | 14.29108 |
| 5.756061 | 6.716133 | 5.85109  | 6.013226 | P | P | P | P | 6.706609 |
| 9.098548 | 9.003056 | 10.11048 | 10.77849 | P | P | P | P | 10.07387 |
| 8.792617 | 8.588464 | 9.283175 |          | A | P | A |   | 9.156576 |
| 2.659829 |          |          | P        |   |   |   |   | 4.906841 |
| 9.867133 | 10.04429 | 9.756985 | 9.054102 | P | P | P | P | 10.00045 |
| 10.87704 | 12.405   | 11.9425  | 10.68895 | P | P | P | P | 12.14425 |
| 9.027873 | 8.556772 | 9.851452 | 10.24104 | P | A | A | A | 9.149727 |
|          |          |          | 4.624328 |   |   |   | M |          |
| 8.215098 | 7.683682 | 6.323266 | 5.211891 | P | P | P | P | 6.799091 |
| 10.53896 | 10.75081 | 9.431696 | 8.669987 | P | P | P | P | 9.511905 |

|          |          |          |            |   |   |   |          |
|----------|----------|----------|------------|---|---|---|----------|
| 8.598557 | 8.304235 | 8.821341 | 7.935206 P | P | P | P | 7.303919 |
| 12.88521 | 11.96885 | 13.26892 | 12.91388 P | P | P | P | 11.77531 |
| 10.18826 | 9.778604 | 9.065256 | 8.587047 P | P | P | P | 8.768225 |
| 9.305007 | 8.727106 | 10.16535 | 9.967318 P | P | P | P | 9.707212 |
|          | 5.240863 | 6.624334 | 6.949885   | P | P | P |          |
| 7.385132 | 6.760362 | 6.575897 | 7.01372 P  | P | P | P | 6.099277 |
| 9.059328 | 7.959663 | 7.056605 | 7.054499 P | P | P | P | 8.548785 |
| 13.70283 | 13.95089 | 12.18046 | 11.15353 P | P | P | P | 13.4836  |
| 11.07283 | 11.00747 | 11.79098 | 11.74956 P | P | P | P | 11.12161 |
| 5.253355 | 6.049156 | 5.873069 | 7.069127 P | P | P | P | 7.163066 |
| 9.515275 | 8.844539 | 9.670911 | 10.00419 P | P | P | P | 8.807292 |
| 7.059785 |          | 5.678173 | 6.365639 M |   | M | P | 7.046813 |
| 10.6567  | 10.42071 | 10.86592 | 11.23298 P | P | P | P | 11.17066 |
| 6.770943 | 6.995666 | 7.294357 | 8.18743 P  | P | P | P | 7.316083 |
|          | 2.962093 |          |            | M |   |   |          |
| 9.798381 | 8.901923 | 9.591476 | 7.762893 P | P | P | P | 8.748521 |
| 11.88306 | 12.37785 | 12.76898 | 13.1822 P  | P | P | P | 12.28924 |
| 13.36782 | 13.93688 | 13.20261 | 12.71827 P | P | P | P | 13.93418 |
| 13.3974  | 14.18675 | 13.50502 | 13.08419 P | P | P | P | 13.87517 |
| 4.66572  | 5.887518 |          | 2.785875 P | P |   | P | 5.663987 |
| 14.69194 | 14.91831 | 13.71568 | 12.66102 P | P | P | P | 14.45056 |
|          |          | 6.339717 | 7.276821   |   | P | A |          |
| 8.82911  | 9.167051 | 10.06086 | 9.80747 P  | P | P | P | 8.791524 |
| 8.670961 | 9.162286 | 8.070562 | 6.30144 P  | P | P | P | 8.499988 |
| 7.04069  | 6.914658 | 7.513632 | 7.71691 P  | P | P | P | 6.81113  |
| 11.81904 | 12.07415 | 10.98197 | 10.58272 P | P | P | P | 11.81777 |
| 9.545675 | 10.31449 | 11.50602 | 11.04138 P | P | P | P | 10.99182 |
| 10.21408 | 10.05338 | 10.4668  | 10.38026 P | P | P | P | 9.167052 |
| 11.05333 | 11.09499 | 11.41131 | 11.86216 P | P | P | P | 11.46608 |
| 8.489897 | 8.2847   | 9.45618  | 8.81851 P  | P | P | P | 8.432261 |
| 6.526131 | 6.416845 | 6.15972  | 7.996906 P | P | P | P | 6.419565 |
|          |          | 8.746481 | 8.641156   |   | A | A |          |
| 8.68341  | 8.535024 | 7.163141 | 7.73318 P  | P | P | P | 8.416389 |
| 8.674128 | 8.612506 | 8.066001 | 7.791671 P | P | P | P | 8.264138 |
| 8.747922 | 8.077677 | 7.645354 | 7.173546 P | P | P | P | 7.412655 |
| 8.556919 | 8.175349 | 6.597373 | 6.546664 P | P | P | P | 8.443195 |
| 11.27573 | 10.85838 | 11.71537 | 11.37313 P | P | P | P | 10.69086 |
| 7.172735 | 6.808546 | 6.160204 | 6.359145 A | P | P | P | 5.331782 |
| 10.88259 | 10.8993  | 12.11446 | 11.84658 P | P | P | P | 9.662112 |
| 10.43214 | 11.2004  | 10.51704 | 9.367842 P | P | P | P | 10.45569 |

|          |          |          |            |   |   |   |          |
|----------|----------|----------|------------|---|---|---|----------|
| 12.42197 | 12.55936 | 11.29189 | 11.5771 P  | P | P | P | 12.5988  |
| 12.31948 | 13.30781 | 12.92372 | 12.5357 P  | P | P | P | 13.35898 |
| 11.41802 | 12.32246 | 12.26628 | 13.33233 P | P | P | P | 12.41718 |
| 7.096193 | 7.277225 |          | 8.715937 P | A |   | M | 8.679906 |
| 7.154501 | 6.599673 | 7.733891 | A          | P | A |   | 6.04316  |
| 6.244961 |          | 6.305522 | 6.484116 A |   | P | A | 6.628391 |
| 7.363503 | 5.358605 | 6.730879 | A          | P | M |   | 6.076376 |
| 9.375315 | 9.850208 | 9.057652 | 8.913346 P | P | P | P | 10.25449 |
| 9.231077 | 9.529141 | 8.869697 | 8.192781 P | P | P | P | 9.475748 |
| 9.159238 | 9.484506 | 8.935193 | 9.265159 P | P | P | P | 10.01033 |
| 8.761727 | 9.563448 | 8.241772 | 8.20774 P  | P | P | P | 9.375713 |
| 9.489461 | 10.20683 | 8.781928 | 7.769211 P | P | P | P | 9.955036 |
| 11.82843 | 12.45613 | 11.088   | 10.2929 P  | P | P | P | 12.00383 |
| 8.957829 | 10.29722 | 10.33401 | 8.015458 P | P | P | P | 9.748426 |
| 8.558757 | 9.534427 | 8.663214 | 7.181268 P | P | P | P | 9.038682 |
| 8.565729 | 9.587723 | 9.997182 | 7.812011 P | P | P | P | 8.881477 |
| 11.70119 | 12.18712 | 10.73235 | 9.948327 P | P | P | P | 11.77265 |
| 6.912762 | 6.629185 | 6.717554 | 4.183023 M | P | P | P | 7.257581 |
|          | 3.525644 |          |            | P |   |   |          |
|          | 5.247385 |          | 2.753786   | A |   | P |          |
| 7.625365 | 9.033625 | 7.228766 | 7.557277 P | P | P | P | 8.032103 |
| 9.359272 | 9.814346 | 8.582277 | 7.069837 P | P | P | P | 9.582893 |
| 5.074014 |          |          | A          |   |   |   |          |
| 12.02174 | 12.57182 | 11.25929 | 10.18394 P | P | P | P | 12.12456 |
| 5.940764 | 6.036035 | 5.926908 | 5.608977 P | P | P | P | 5.851214 |
| 9.409493 | 10.47707 | 10.39702 | 6.979091 P | P | P | P | 10.26326 |
| 6.938536 | 7.790013 | 7.928267 | 8.665941 P | P | P | P | 8.570977 |
| 11.46161 | 12.8187  | 11.03748 | 11.64266 P | P | P | P | 12.11998 |
| 11.94894 | 12.19095 | 11.37478 | 11.6795 P  | P | P | P | 12.03568 |
| 13.55856 | 12.98205 | 13.59553 | 14.98334 P | P | P | P | 12.1525  |
| 13.91155 | 13.44228 | 14.9246  | 15.66062 P | P | P | P | 13.29825 |
| 13.54542 | 12.78749 | 13.45234 | 14.95928 P | P | P | P | 11.99844 |
| 6.619962 | 5.615272 | 8.029239 | 8.011838 A | M | A | A | 6.273911 |
| 6.78266  | 5.630264 | 7.74051  | 6.596644 M | P | A | A | 6.398527 |
| 8.175529 | 7.619738 | 8.99227  | 9.176741 P | P | P | P | 8.668328 |
| 10.2623  | 10.13034 | 10.79313 | 10.77881 P | P | P | P | 10.73991 |
| 8.391542 | 8.940556 | 9.754361 | 8.539882 P | P | P | P | 9.308682 |
| 8.984521 | 9.004262 | 9.631585 | 8.875671 P | P | P | P | 8.817138 |
| 5.371254 |          |          | 2.697615 P |   |   | P | 6.164748 |
| 8.558299 | 9.158753 | 8.723848 | 10.06921 P | P | P | P | 9.157047 |

|          |          |          |            |   |   |   |          |
|----------|----------|----------|------------|---|---|---|----------|
| 12.50582 | 12.83183 | 10.89349 | 11.85936 P | P | P | P | 12.62807 |
|          |          |          | 6.923246   |   |   | A |          |
| 14.68083 | 14.54738 | 15.16197 | 16.21367 P | P | P | P | 15.56612 |
| 9.585428 | 8.925554 |          | 9.126132 P | P |   | A | 11.05967 |
| 12.42883 | 12.60513 | 13.695   | 13.72795 P | P | P | P | 12.12329 |
| 9.27738  | 7.667961 | 10.21552 | 10.29979 P | P | P | P | 9.3922   |
| 9.003893 | 9.415938 | 9.899129 | 10.84306 P | P | P | P | 9.710689 |
| 4.854101 | 7.187978 | 7.537767 | 7.397544 P | P | P | A | 7.188147 |
| 10.78211 | 9.394911 | 10.54608 | 10.16895 P | P | P | P | 9.116443 |
| 10.73847 | 9.752916 | 10.11545 | 10.55363 P | P | P | P | 9.066134 |
| 11.59625 | 11.21059 | 11.0944  | 10.82697 P | P | P | P | 11.18459 |
| 7.9423   | 7.288165 | 5.844264 | 6.49406 P  | P | P | P | 7.053809 |
| 6.351122 | 6.545209 | 6.732896 | 6.884419 P | P | P | P | 5.483771 |
| 12.28235 | 13.56329 | 14.10666 | 13.65429 P | P | P | P | 14.40892 |
| 7.199926 | 7.637877 | 7.990046 | 8.378611 P | P | P | P | 8.436137 |
| 5.368764 |          |          | 7.161522 P |   |   | P | 6.190051 |
|          | 6.116794 | 6.633535 |            | P | A |   |          |
| 9.387177 | 9.15049  | 10.05467 | 9.944959 P | P | P | P | 8.92922  |
| 8.237302 | 8.567563 | 10.70006 | 9.685914 P | P | P | P | 8.284823 |
|          | 6.73786  |          |            | A |   |   |          |
| 11.12371 | 10.57455 | 10.28508 | 10.66296 P | P | P | P | 11.43259 |
|          |          | 4.391571 |            |   | M |   |          |
| 5.21276  |          | 5.080754 | 6.012672 P |   | P | A | 6.234515 |
| 10.3021  | 9.97118  | 10.48035 | 10.76884 P | P | P | P | 10.30549 |
| 7.190983 | 7.891304 | 6.911821 | 6.967379 P | P | P | P | 7.383752 |
| 9.616136 | 8.302728 | 11.27457 | 11.80419 P | A | M | A | 8.625503 |
| 5.909848 | 5.875088 |          | A          | A |   |   | 6.262919 |
| 6.205884 |          |          | A          |   |   |   | 3.914256 |
| 6.637558 | 5.263186 | 7.477684 | P          | A | P |   | 5.684248 |
| 6.638841 | 6.348729 | 6.687971 | 5.477425 P | P | P | P | 7.037962 |
| 6.308991 | 5.688951 |          | P          | A |   |   | 6.31191  |
|          |          |          | 10.22387   |   |   | A |          |
| 9.367785 | 8.731378 | 7.663384 | 7.651822 P | P | P | P | 9.639599 |
| 5.927501 | 6.375079 |          | 7.651209 P | A |   | A | 6.945876 |
| 8.307582 | 7.934852 | 9.120406 | 8.912061 P | P | P | P | 8.232303 |
| 8.074927 | 6.920031 | 6.771715 | 7.394722 P | P | P | P | 6.976646 |
| 9.917438 | 9.74237  | 8.495714 | 10.24242 P | P | P | P | 11.00454 |
|          |          | 5.417013 | 6.763885   |   | P | P |          |
| 7.819259 | 7.289574 | 7.22785  | 7.098633 P | P | P | P | 7.344762 |
| 7.295469 |          | 8.254771 | 8.214865 P |   | A | A | 7.374268 |



|          |          |          |          |   |   |   |          |
|----------|----------|----------|----------|---|---|---|----------|
| 6.732812 | 5.850012 | 7.976789 | 6.987015 | P | P | P | 6.412192 |
|          |          | 5.447142 | 6.605907 |   | A | A |          |
| 6.754715 | 5.746787 | 11.24288 | P        | P | P |   | 6.4484   |
| 9.167792 | 8.329691 | 8.361941 | 9.186501 | P | P | P | 8.625993 |
| 7.532819 | 8.464156 | 7.471095 | 8.064198 | P | P | P | 8.198664 |
| 11.43294 | 11.61117 | 10.87038 | 11.3578  | P | P | P | 11.76481 |
|          |          | 6.433472 | 6.62902  |   | P | A |          |
|          |          | 5.346114 |          |   | M |   |          |
| 8.430293 | 8.983878 | 10.3155  | 12.18209 | A | A | P | 2.64133  |
| 8.911444 | 9.118077 | 10.29566 | 10.14312 | P | P | P | 9.129624 |
| 10.84799 | 10.82385 | 11.81354 | 10.89585 | P | P | P | 10.22798 |
| 11.66628 | 10.65638 | 11.41708 | 11.62342 | P | P | P | 10.60418 |
| 7.266125 | 6.996738 | 6.700253 | 6.302122 | P | P | P | 7.813765 |
| 5.190203 |          |          | A        |   |   |   | 4.050242 |
| 9.640977 | 8.375403 | 9.344944 | 8.811065 | P | P | P | 8.15061  |
| 6.093474 |          |          | A        |   |   |   | 4.917553 |
| 8.401121 | 8.328023 | 8.978005 | 6.976889 | P | P | P | 7.869515 |
| 10.61401 | 9.487404 | 10.5108  | 9.862294 | P | P | P | 9.265641 |
| 4.418706 | 7.026387 |          | M        | A |   |   | 6.389987 |
| 11.96937 | 12.14231 | 13.49414 | 14.16284 | P | P | P | 12.30448 |
| 7.810581 | 9.067466 | 8.248384 | 7.872059 | P | P | M | 7.976627 |
| 8.412525 | 10.29505 | 9.604501 | 8.702888 | P | A | P | 2.051295 |
| 8.917047 | 8.12955  | 9.065178 | 8.559425 | P | P | P | 7.946757 |
| 9.992388 | 9.493281 | 10.60959 | 10.48854 | P | P | P | 9.399292 |
| 10.01084 | 9.506285 | 8.683764 | 8.588904 | P | P | P | 9.902596 |
| 11.06921 | 10.10251 | 10.93869 | 11.65229 | P | P | P | 10.00733 |
| 12.33963 | 12.02704 | 10.20363 | 9.548755 | P | P | P | 12.23323 |
| 7.908432 | 5.474612 | 7.531057 | 7.331214 | P | A | P | 8.706038 |
| 7.545291 | 7.153461 | 10.08886 | 11.17579 | A | A | A | 7.563059 |
| 8.442402 | 8.712528 | 10.0543  | 9.882625 | P | P | P | 8.74102  |
| 8.092243 | 8.853089 | 10.33307 | 9.881399 | P | P | P | 8.70245  |
| 1.571427 |          |          | P        |   |   |   | 5.277866 |
| 10.71052 | 11.75763 | 10.52794 | 10.37642 | P | P | P | 11.19693 |
| 6.834334 | 7.515772 | 6.879321 | P        | P | P |   | 6.752356 |
| 8.622457 | 7.031126 | 8.827989 | 8.131043 | P | P | A | 8.256806 |
| 9.755128 | 9.712673 | 8.545626 | 8.270042 | P | P | P | 10.57076 |
| 9.3554   | 9.708221 | 9.341662 | 9.476746 | P | P | P | 10.11708 |
| 9.117108 | 9.452761 | 9.803827 | 9.614278 | P | P | P | 9.359418 |
| 5.701099 |          | 6.237907 | 6.906234 |   | P | A | 3.190546 |
| 9.398232 | 9.703336 | 8.819168 | 8.575446 | P | P | P | 9.518271 |

|          |          |          |            |   |   |   |          |
|----------|----------|----------|------------|---|---|---|----------|
| 10.52297 | 10.79536 | 9.991035 | 10.05019 P | P | P | P | 10.9584  |
| 6.948535 | 7.468484 | 7.296749 | 6.310862 P | P | P | P | 7.031282 |
|          | 5.961555 | 4.666664 | 5.991441   | P | P | P |          |
|          |          |          | 3.384826   |   |   | P |          |
| 10.17117 | 9.528425 | 10.49191 | 9.909451 P | P | P | P | 9.677663 |
| 9.309882 | 9.343501 | 8.54491  | 8.577319 P | P | P | P | 9.278489 |
| 8.232293 | 9.192096 | 8.498778 | 8.02832 P  | P | P | P | 8.225931 |
| 10.74405 | 10.96264 | 10.28915 | 10.16913 P | P | P | P | 10.58804 |
| 5.930135 | 5.223752 | 6.016548 | P          | P | A |   | 6.683    |
| 9.520668 | 9.059371 | 9.955011 | 8.450418 P | P | P | P | 8.292425 |
| 9.847614 | 9.984012 | 10.648   | 11.20489 P | P | P | P | 10.55664 |
| 9.723901 | 10.72723 | 11.71512 | 12.01046 P | P | P | P | 10.2265  |
| 3.594067 |          |          | A          | P |   |   | 5.659129 |
| 10.10634 | 10.01955 | 10.45043 | 9.842964 P | P | P | P | 9.735029 |
| 9.597022 | 9.771269 | 8.649504 | 8.983459 P | P | P | P | 9.317008 |
| 7.431699 | 7.040351 | 6.154002 | 6.905613 P | P | P | P | 7.24245  |
| 6.374686 | 6.248522 | 6.854533 | 6.868837 A | P | P | P | 5.839611 |
| 7.547675 | 6.648415 | 7.492971 | 7.819345 P | M | P | A | 7.412867 |
| 8.57195  | 7.652224 | 9.339537 | 9.642716 P | P | P | P | 7.9111   |
| 11.7661  | 10.45142 | 11.25396 | 11.47315 P | P | P | P | 10.08365 |
| 9.159495 | 8.634153 | 8.617599 | 7.672308 P | P | P | P | 8.265237 |
| 4.252906 | 5.381713 | 4.886951 | 2.078449 A | P | M | P | 5.06279  |
| 10.72131 | 11.48368 | 10.35203 | 9.90402 P  | P | P | P | 11.0369  |
| 10.41361 | 9.718715 | 10.28609 | 10.14799 P | P | P | P | 9.199584 |
| 9.416112 | 9.673459 | 10.27772 | 10.64448 P | P | P | P | 10.30918 |
| 8.843067 | 9.413598 | 9.807449 | 9.999396 P | P | P | P | 9.640444 |
| 5.668925 | 5.175158 |          | 3.416466 P | P |   | P | 5.595419 |
| 6.390551 | 7.206598 | 7.005889 | P          | A | A |   | 7.030815 |
| 9.266006 | 9.415741 | 8.05923  | 8.937367 P | P | P | P | 9.342615 |
| 7.483527 | 6.21093  | 6.822833 | 7.242477 P | P | P | P | 6.134729 |
| 7.381439 | 6.915813 | 5.648408 | 6.455884 P | P | P | P | 7.493766 |
| 8.118602 | 8.837171 | 7.974004 | 7.747064 P | P | P | P | 8.428235 |
| 11.88609 | 11.81777 | 10.32742 | 10.58539 P | P | P | P | 11.91168 |
| 10.0119  | 10.18505 | 9.087708 | 9.265174 P | P | P | P | 10.00393 |
| 8.215859 | 7.620871 | 8.66722  | 9.321577 P | P | P | P | 7.633988 |
| 6.144921 | 6.31412  | 6.706219 | A          | P | P |   | 2.688021 |
| 12.82659 | 11.17622 | 12.52942 | 12.88315 P | P | P | P | 10.83728 |
| 12.67631 | 13.10377 | 13.55199 | 14.22525 P | P | P | P | 12.85162 |
| 7.904968 | 6.992824 | 6.328294 | 6.046907 P | P | P | P | 7.599238 |
| 7.284168 | 6.892839 | 7.319082 | 8.312878 A | P | A | P | 7.008438 |

|          |          |          |            |   |   |   |          |
|----------|----------|----------|------------|---|---|---|----------|
| 8.661779 | 7.514627 | 9.461376 | 9.891188 P | P | P | P | 8.226753 |
|          |          |          | 8.173745   |   |   | A |          |
| 11.32285 | 11.57807 | 10.04958 | 9.772035 P | P | P | P | 11.22974 |
| 7.028029 | 6.420189 | 6.374313 | 5.101085 P | P | P | P | 6.864432 |
| 6.441334 | 6.536536 | 7.084582 | 7.153051 P | P | A | P | 7.456725 |
| 12.25097 | 11.35005 | 12.81917 | 12.97223 P | P | P | P | 11.08454 |
| 8.736511 | 8.476628 | 10.1894  | 11.2912 P  | P | P | P | 8.547    |
| 14.8928  | 14.70773 | 14.1357  | 14.29039 P | P | P | P | 15.27428 |
| 12.06897 | 11.0283  | 12.29242 | 12.55346 P | P | P | P | 10.8538  |
| 6.834994 | 6.667503 | 7.959079 | 8.614829 A | P | P | A | 6.872957 |
| 12.74816 | 11.63076 | 13.9651  | 14.75915 P | P | P | P | 11.89342 |
| 5.936199 |          | 5.758333 | A          |   | P |   | 1.381219 |
|          | 8.070658 | 7.786424 | 7.492864   | P | P | P |          |
| 8.288288 | 7.409469 | 8.408305 | 8.003457 P | P | P | P | 7.22839  |
| 12.35848 | 12.58784 | 13.40583 | 12.41978 P | P | P | P | 12.37422 |
| 11.62896 | 11.97427 | 12.76117 | 13.00408 P | P | P | P | 12.16248 |
| 9.71716  | 9.633964 | 10.75147 | 10.66983 P | P | P | P | 9.470708 |
| 6.938567 | 7.735025 | 8.060324 | 8.22806 P  | P | P | P | 7.95353  |
| 6.303787 | 5.333974 | 6.369791 | A          | A | A |   | 5.901214 |
| 11.00323 | 9.966811 | 8.559258 | 9.380896 P | P | P | P | 10.2105  |
| 10.00398 | 9.537471 | 9.179999 | 9.26103 P  | P | P | P | 9.678181 |
| 7.607606 | 7.150575 | 8.27896  | 8.557705 P | P | P | M | 7.771283 |
| 9.635307 | 9.693426 | 8.962625 | 7.364991 P | P | P | P | 9.121938 |
| 9.372436 | 8.788461 | 10.15164 | 10.62159 P | A | A | P | 9.049886 |
| 5.394763 |          |          | 6.443087 P |   |   | A | 6.83526  |
|          |          |          | 4.630528   |   |   | P |          |
| 8.147853 | 7.793082 | 8.413253 | 8.699393 P | P | P | P | 7.624351 |
| 7.784194 | 7.008872 | 6.460544 | P          | P | P |   | 7.191566 |
| 6.323272 | 7.052252 | 6.831532 | 2.985729 P | P | P | P | 7.116949 |
| 8.056184 | 8.085744 | 7.518242 | 8.215039 P | P | P | P | 8.924649 |
|          | 5.538532 | 6.506108 | 6.910034   | A | M | P |          |
| 10.92349 | 11.04547 | 10.3814  | 9.080426 P | P | P | P | 10.67337 |
| 4.144115 |          |          | P          |   |   |   | 5.252331 |
| 9.946405 | 10.97137 | 8.780268 | 8.520101 P | P | P | P | 10.34975 |
| 8.764931 | 7.752569 | 8.489142 | 8.515293 P | P | P | P | 8.492317 |
| 6.424215 | 6.182764 | 6.764097 | 6.765092 P | A | A | P | 6.887464 |
| 8.268266 | 8.319194 | 8.647387 | 8.794383 P | P | P | P | 9.234554 |
| 11.44344 | 10.56529 | 11.31319 | 11.56611 P | P | P | P | 11.68631 |
| 6.35687  | 7.568115 | 8.281323 | 8.640428 P | A | A | A | 8.029526 |
| 8.435905 | 8.28581  | 7.966302 | 8.633682 P | P | P | P | 9.043499 |

|          |          |          |          |   |   |   |          |
|----------|----------|----------|----------|---|---|---|----------|
| 9.846878 | 9.385273 | 9.777069 | 9.404703 | P | P | P | 9.101387 |
| 13.0195  | 13.42027 | 13.35309 | 13.39481 | P | P | P | 13.29001 |
| 6.335873 | 7.179573 | 6.592115 | 6.378991 | P | P | P | 6.189953 |
| 7.994543 | 9.450363 | 8.960313 | 9.479169 | P | P | P | 8.167676 |
| 7.535798 | 6.790313 | 5.879952 | 4.586894 | P | P | P | 6.376234 |
| 8.646594 | 8.811229 | 8.019742 | 6.794385 | P | P | P | 8.314503 |
|          | 6.363936 |          | 6.244568 | A |   | P |          |
| 10.21503 | 9.826816 | 9.457342 | 8.712335 | P | P | P | 9.502553 |
| 11.88195 | 11.42554 | 11.44376 | 11.31057 | P | P | P | 11.19187 |
| 9.220443 | 8.672507 | 7.571926 | 8.351568 | P | P | P | 8.855499 |
| 10.30644 | 10.3362  | 11.20595 | 11.42871 | P | P | P | 10.38608 |
| 10.20061 | 10.87129 | 11.73889 | 11.16967 | P | P | P | 10.24132 |
| 10.36256 | 9.97786  | 8.261849 | 9.02368  | P | P | P | 10.73157 |
| 6.650716 | 7.230917 | 7.012075 | 6.822405 | P | P | P | 6.251389 |
| 6.625081 | 5.311636 | 7.510431 | 7.807999 | A | P | M | 6.10332  |
| 10.06355 | 10.46202 | 9.780667 | 9.067826 | P | P | P | 10.12744 |
| 5.913993 | 6.683092 | 7.011339 | 6.93407  | P | P | P | 6.732342 |
| 6.703815 |          | 8.054797 | A        |   | A |   | 5.324172 |
|          |          |          | 3.259389 |   |   | P |          |
| 6.175231 | 5.965999 | 6.080353 | 6.545435 | P | P | A | 6.026014 |
| 10.15394 | 11.20989 | 9.126266 | 8.669384 | P | P | P | 10.49719 |
| 8.639074 | 7.912308 | 9.568712 | 9.991645 | P | P | P | 6.911741 |
| 6.849555 | 6.38885  | 7.382461 | 7.231276 | P | A | P | 7.301004 |
| 8.074023 | 7.750137 | 8.202213 | 8.435739 | P | P | A | 7.921138 |
| 8.104388 | 7.521719 | 8.42196  | 7.592798 | M | P | A | 6.96213  |
| 7.565399 | 7.302051 | 6.589523 | 6.428665 | P | P | P | 7.449338 |
| 11.65704 | 12.13155 | 11.56581 | 10.33688 | P | P | P | 11.76164 |
| 4.133217 | 4.987413 |          | P        | P |   |   | 5.685342 |
| 8.493935 | 8.332253 | 8.802622 | 9.308155 | P | A | P | 8.062493 |
| 11.60512 | 11.74392 | 10.76664 | 10.67632 | P | P | P | 11.07201 |
| 10.20989 | 8.686678 | 9.783425 | 9.749838 | P | P | P | 9.112475 |
| 11.55119 | 12.02797 | 12.46755 | 12.7539  | P | P | P | 12.02614 |
| 13.07037 | 12.6378  | 12.26166 | 11.56739 | P | P | P | 12.73979 |
| 10.02018 | 10.37449 | 11.65335 | 11.60993 | P | P | P | 10.03263 |
| 9.260267 | 9.785378 | 8.846308 | 9.012759 | P | P | P | 9.872853 |
| 4.772301 |          |          | P        |   |   |   | 5.993903 |
| 7.409464 | 6.39243  | 6.575982 | 5.998754 | P | P | P | 5.700023 |
| 5.365367 | 5.143671 | 4.575881 | P        | P | P |   | 5.676874 |
| 5.48879  | 5.521157 |          | A        | P |   |   | 3.184945 |
| 10.85837 | 10.47152 | 9.266577 | 9.742083 | P | P | P | 10.93764 |

|          |          |          |          |   |   |   |          |
|----------|----------|----------|----------|---|---|---|----------|
| 5.793855 | 5.685591 | 5.51081  | 7.268306 | A | A | P | 5.750643 |
| 11.86188 | 12.00108 | 10.98684 | 10.87966 | P | P | P | 11.49476 |
| 11.68208 | 12.22111 | 11.16662 | 10.94446 | P | P | P | 12.00218 |
| 9.245482 | 7.903086 | 9.518649 | 9.219962 | A | P | A | 6.917488 |
| 7.58189  | 7.729596 | 7.520515 | 8.135436 | P | P | A | 7.819866 |
|          | 4.449448 |          |          | P |   |   |          |
|          |          | 5.213479 | 6.095397 |   | P | A |          |
| 9.957857 | 10.4533  | 9.651006 | 8.898839 | P | P | P | 10.11732 |
| 5.700275 | 6.336391 |          | 2.033856 | A |   | P | 6.242236 |
| 8.194764 | 9.126541 | 8.610071 | 6.56511  | P | P | P | 8.570091 |
| 8.508379 | 8.965834 | 7.174382 | 7.658901 | P | P | P | 8.937276 |
| 6.656642 | 7.341461 | 6.152279 | 7.442754 | P | P | P | 6.944272 |
| 11.72522 | 11.19337 | 10.55861 | 11.38634 | P | P | P | 11.61535 |
| 7.960875 | 6.638712 | 7.537388 | 8.306086 | A | P | P | 7.452448 |
| 5.779027 |          | 6.340574 | A        |   | P |   | 2.851849 |
| 13.56242 | 13.9915  | 10.75689 | 12.16029 | P | P | P | 14.24877 |
| 11.89772 | 10.9372  | 11.62616 | 11.14684 | P | P | P | 9.567806 |
| 10.58839 | 11.01107 | 11.41429 | 9.928639 | P | P | P | 10.60357 |
| 8.779749 | 9.354426 | 8.63087  | 8.25903  | P | P | P | 9.029456 |
| 10.52909 | 10.34983 | 12.21638 | 11.94773 | P | P | P | 10.22206 |
| 13.40357 | 13.03215 | 11.61467 | 12.51018 | P | P | P | 13.48975 |
| 7.939551 | 5.869111 | 7.254949 | 7.489631 | P | P | P | 7.034487 |
| 7.599605 |          | 6.252233 | 6.263964 |   | P | P | 6.447714 |
| 12.11795 | 12.31187 | 12.90356 | 12.66466 | P | P | P | 11.37541 |
| 6.227913 | 6.333155 | 6.112466 | 6.312042 | P | P | A | 5.165521 |
|          |          | 6.5614   |          |   | P |   |          |
| 6.962581 | 6.588105 | 7.014363 | A        | P | P |   | 6.226334 |
| 8.509435 | 8.272936 | 8.95956  | 9.040692 | P | P | M | 8.618197 |
| 10.71222 | 11.22643 | 12.02049 | 11.55576 | P | P | P | 11.0574  |
| 4.819074 |          | 6.039811 | P        |   | P |   | 6.286973 |
| 8.387947 | 7.899727 | 7.06233  | 6.870683 | P | P | P | 7.471434 |
| 10.95838 | 10.71004 | 10.21792 | 9.649539 | P | P | P | 10.12502 |
| 4.131132 |          |          | P        |   |   |   | 6.108985 |
| 11.3184  | 12.24873 | 11.47805 | 10.65278 | P | P | P | 11.74726 |
| 7.115396 | 6.897898 | 7.536787 | 8.719733 | P | P | P | 6.502476 |
| 6.474499 | 7.293946 | 6.391853 | A        | P | P |   | 6.370395 |
| 12.74422 | 13.10675 | 12.1181  | 11.33091 | P | P | P | 12.99666 |
| 9.329622 | 9.426269 | 8.589199 | 8.893567 | P | P | P | 9.702835 |
| 10.79628 | 11.61301 | 10.79972 | 10.39221 | P | P | P | 11.46496 |
| 7.400936 | 8.268611 | 8.067448 | 7.099022 | A | P | P | 7.251679 |

|          |          |          |            |   |   |   |          |
|----------|----------|----------|------------|---|---|---|----------|
| 8.978108 | 8.548926 | 10.13761 | 10.9114 P  | P | P | P | 7.965564 |
| 9.020962 | 8.307114 | 9.457414 | 9.307293 P | P | P | P | 6.791043 |
| 9.811467 | 9.936652 | 8.524318 | 8.28471 P  | P | P | P | 8.505048 |
| 7.866962 | 7.940307 | 9.068377 | 10.07603 P | P | P | P | 7.289741 |
|          |          | 7.476157 |            |   | A |   |          |
|          |          |          | 1.315962   |   |   | P |          |
|          |          | 7.292079 | 8.149262   |   | P | A |          |
| 6.51538  | 6.293265 | 6.2536   | 7.442035 P | A | M | P | 6.8445   |
| 9.717008 | 7.136545 | 9.615896 | 10.03249 P | P | P | P | 8.678747 |
| 8.386538 | 6.082413 | 7.673867 | 9.076526 P | P | P | P | 7.036939 |
| 9.133047 | 8.228384 | 9.247239 | 9.995698 P | P | P | P | 8.599326 |
| 7.23033  | 6.70749  | 8.287488 | 8.164451 P | P | P | P | 7.168446 |
| 8.12217  | 8.057155 | 8.202802 | 7.758129 P | P | P | P | 6.962491 |
| 10.62872 | 10.79413 | 9.870433 | 9.354979 P | P | P | P | 10.71294 |
| 9.583525 | 9.045491 | 10.38042 | 8.765024 P | P | P | P | 8.598564 |
| 7.632103 | 7.434304 | 7.517188 | 7.535508 P | P | P | P | 7.279087 |
| 7.540309 | 7.351039 | 9.455827 | 8.452738 A | P | P | P | 6.861684 |
| 8.128266 | 7.490828 | 8.748524 | 7.660376 P | P | P | P | 7.707013 |
| 11.97972 | 12.82765 | 11.89053 | 11.73742 P | P | P | P | 13.22013 |
| 8.637343 | 8.318664 | 8.843721 | 8.298837 P | P | P | P | 7.622374 |
| 5.784895 | 4.23052  | 5.996476 | P          | P | P |   | 5.863564 |
| 6.835311 | 6.751028 | 6.977562 | 7.875458 P | P | P | A | 7.102431 |
| 8.511341 | 8.198101 | 8.777041 | 8.703244 P | A | A | P | 8.341406 |
| 6.696753 | 6.597656 | 9.347183 | 7.813867 A | P | P | P | 5.661017 |
| 12.7811  | 12.53591 | 12.80619 | 14.30962 P | P | P | P | 13.5434  |
| 8.792698 | 8.624977 | 8.682273 | 9.725391 P | P | P | P | 8.39247  |
| 10.75735 | 10.93414 | 10.1909  | 9.266416 P | P | P | P | 10.69718 |
| 7.076797 | 7.204846 | 4.494875 | 6.001587 P | P | P | P | 6.677368 |
| 10.43099 | 9.750147 | 9.704609 | 10.11117 P | P | P | P | 10.6243  |
| 9.1776   | 8.408623 | 10.15539 | 10.28668 P | P | P | P | 8.752674 |
| 12.10277 | 12.39733 | 10.74308 | 10.52321 P | P | P | P | 11.81519 |
| 8.286452 | 8.723138 | 7.000546 | 6.694181 P | P | P | P | 8.24442  |
| 8.568794 | 8.240098 | 7.512496 | 6.266895 P | P | P | P | 7.517192 |
| 9.955815 | 10.60277 | 9.49274  | 8.650252 P | P | P | P | 10.09311 |
| 1.448818 | 6.554881 |          | 5.254823 P | P |   | P | 5.663923 |
| 11.45164 | 10.11555 | 10.73846 | 9.487269 P | P | P | P | 9.860092 |
|          |          |          | 7.367187   |   |   | A |          |
| 8.41277  | 9.159825 | 7.60748  | 7.726264 P | P | P | P | 9.289556 |
| 10.75375 | 10.71793 | 11.02984 | 10.30845 P | P | P | P | 10.53432 |
| 11.88466 | 12.56261 | 11.53512 | 10.78705 P | P | P | P | 12.12703 |

|          |          |          |            |   |   |   |          |
|----------|----------|----------|------------|---|---|---|----------|
| 9.590557 | 9.103844 | 10.21469 | 9.870195 P | P | P | P | 9.271981 |
|          | 4.561491 |          | 5.439092   | A |   | M |          |
| 5.582841 |          |          | A          |   |   |   | 3.071467 |
| 10.67083 | 9.643979 | 9.203692 | 10.21326 P | P | P | P | 11.1393  |
| 10.07376 | 9.515165 | 10.50769 | 11.30482 P | P | P | P | 9.904702 |
| 11.33781 | 11.06914 | 11.17508 | 10.52945 P | P | P | P | 10.00333 |
|          |          | 4.358288 |            |   | P |   |          |
| 6.812685 | 6.700066 | 6.861938 | 6.812512 P | P | A | P | 6.768012 |
| 9.001679 | 8.348439 | 9.501192 | 9.369758 P | A | A | A | 8.701778 |
| 9.668121 | 8.967411 | 9.97254  | 9.775324 P | P | P | P | 8.864805 |
| 11.64466 | 12.22056 | 10.71565 | 10.70032 P | P | P | P | 11.79076 |
|          | 7.529018 |          | 4.238873   | M |   | P |          |
| 10.68781 | 10.50087 | 11.5694  | 11.40428 P | P | P | P | 10.72482 |
| 6.367026 | 4.157451 |          | A          | P |   |   | 5.486329 |
| 8.305865 | 8.943276 | 9.159531 | 9.054657 P | P | P | P | 8.481279 |
|          | 6.873141 | 4.420076 |            | A | P |   |          |
| 12.42692 | 12.73511 | 13.36214 | 14.72323 P | P | P | P | 13.32424 |
| 6.486503 | 7.138573 | 4.724582 | 2.639581 P | P | P | P | 5.958808 |
| 8.22506  | 8.724105 | 7.693696 | 6.326907 P | P | P | P | 8.340612 |
| 6.647932 | 6.40379  | 7.191505 | 7.957392 P | P | P | P | 7.082396 |
|          | 2.75529  |          | 6.898962   | P |   | P |          |
|          | 5.725799 | 6.210996 | 6.878411   | P | A | A |          |
| 8.790085 | 9.610737 | 8.004295 | 8.226399 P | P | P | P | 9.191079 |
|          |          | 5.430632 | 3.420206   |   | M | P |          |
| 11.15958 | 11.48932 | 10.38288 | 9.252639 P | P | P | P | 11.1664  |
| 7.169334 | 7.97152  | 6.973334 | 7.115563 P | P | P | P | 6.809607 |
| 12.50511 | 12.60295 | 11.68213 | 11.55437 P | P | P | P | 12.87878 |
| 15.16742 | 15.27543 | 15.70591 | 16.75648 P | P | P | P | 15.58384 |
| 13.60721 | 12.99202 | 13.98794 | 14.17625 P | P | P | P | 12.80526 |
|          | 4.824132 |          |            | P |   |   |          |
| 9.016008 | 8.871205 | 7.615334 | 7.143365 P | P | P | P | 8.463339 |
| 11.26868 | 12.06041 | 12.51506 | 13.34964 P | P | P | P | 11.95573 |
| 8.73629  | 8.176223 | 7.582995 | 6.984578 P | P | P | P | 8.904852 |
| 11.15785 | 10.97636 | 11.68131 | 10.97108 P | P | P | P | 10.67313 |
| 8.214689 | 8.535848 | 9.168028 | 9.380013 P | P | A | A | 8.526972 |
| 7.492464 | 7.434881 | 6.347909 | 5.878174 P | P | P | P | 7.032107 |
| 7.478689 | 6.57308  | 5.991925 | 6.038597 P | P | P | P | 6.866347 |
| 12.37206 | 12.03924 | 11.76875 | 11.68431 P | P | P | P | 12.12976 |
| 5.815046 | 7.356425 | 4.262704 | 6.377324 P | P | P | P | 6.575772 |
| 7.429366 | 6.635823 | 7.794243 | 8.527476 M | P | P | A | 7.60074  |

|          |          |          |          |   |   |   |          |
|----------|----------|----------|----------|---|---|---|----------|
| 6.882088 | 7.055394 | 6.924866 | 7.369896 | A | P | M | 7.215602 |
| 8.153422 | 6.909549 | 7.270398 | 6.89901  | A | P | P | 6.698552 |
| 11.35173 | 12.01375 | 10.7092  | 9.903569 | P | P | P | 11.72029 |
| 7.958596 | 9.172855 | 7.955509 | 7.927887 | P | P | P | 9.195095 |
| 7.380832 | 6.615358 | 6.384419 | 3.288128 | A | P | P | 6.493691 |
| 12.27353 | 13.12852 | 11.65619 | 11.25633 | P | P | P | 13.30922 |
| 6.236729 | 5.194449 | 4.566683 | A        | P | P |   | 5.930296 |
| 6.052673 | 6.686703 | 6.491528 | 7.252417 | P | P | P | 7.181799 |
| 10.08105 | 8.557429 | 10.10895 | 10.41812 | P | P | P | 8.959516 |
| 12.94209 | 13.00439 | 14.41538 | 14.90255 | P | P | P | 12.94282 |
|          |          | 7.292244 |          |   | M |   |          |
|          | 5.790732 |          |          | A |   |   |          |
| 8.613482 | 9.470814 | 9.156203 | 8.137423 | P | P | P | 8.091146 |
| 6.393752 |          | 7.8502   | 7.335516 | P | A | A | 6.145379 |
|          | 5.14988  | 6.427136 |          | P | M |   |          |
| 9.146086 | 9.843493 | 10.10325 | 10.08233 | P | P | P | 10.03655 |
| 13.51621 | 14.3682  | 14.34145 | 14.2439  | P | P | P | 14.9835  |
| 8.733487 | 7.851718 | 9.48112  | 9.102481 | P | P | P | 8.51563  |
| 6.895122 |          | 7.885752 | 8.26221  | A | A | A | 3.749744 |
| 8.577569 | 8.128847 | 8.695297 | 8.118935 | P | P | P | 8.149146 |
| 9.397291 | 10.54522 | 10.01435 | 10.51012 | P | P | P | 10.46131 |
| 10.1534  | 10.88119 | 10.52262 | 11.02709 | P | P | P | 11.2197  |
| 9.445941 | 10.49538 | 9.810875 | 8.9926   | P | P | P | 10.31635 |
| 11.83453 | 11.61232 | 10.95956 | 11.06585 | P | P | P | 12.26469 |
| 8.640783 |          | 9.570065 | 9.600801 | A | A | A | 8.421738 |
| 10.98167 | 11.06906 | 11.10426 | 11.34576 | P | P | P | 10.38137 |
| 5.749472 | 4.359187 | 6.380325 | M        | M | P |   | 6.800462 |
| 11.81419 | 12.37967 | 12.50836 | 12.45175 | P | P | P | 12.09335 |
| 10.6073  | 10.72935 | 10.88913 | 10.52544 | P | P | P | 11.03718 |
| 7.335247 | 5.666123 | 7.298575 | 8.020676 | A | A | A | 5.522547 |
| 12.26158 | 12.5952  | 13.06557 | 13.07981 | P | P | P | 12.18581 |
| 7.292095 | 6.819786 | 6.105831 | 5.859357 | P | P | P | 6.872192 |
| 8.442365 | 6.798999 | 8.449388 | 9.326903 | P | P | A | 6.64309  |
| 6.32804  | 6.216091 | 5.840975 | 4.568891 | A | P | P | 6.648501 |
| 7.541193 | 6.001783 | 6.597671 | 6.581221 | P | P | P | 6.341164 |
| 13.0934  | 13.94521 | 14.13807 | 13.65401 | P | P | P | 14.3901  |
| 10.29049 | 10.99732 | 9.522654 | 9.677747 | P | P | P | 10.16796 |
| 6.606671 | 6.525741 | 6.992151 | A        | M | A |   | 6.051576 |
| 6.394392 | 6.809316 |          | A        | A |   |   | 6.436515 |
| 7.890289 |          | 9.111986 | A        |   | A |   | 7.316747 |



|          |          |          |            |   |   |   |          |
|----------|----------|----------|------------|---|---|---|----------|
| 8.44906  | 8.674202 | 9.49843  | 9.997656 P | P | P | P | 9.058397 |
| 6.119539 | 6.299546 | 6.360986 | 7.487064 M | A | A | A | 6.767534 |
| 12.52965 | 12.74311 | 12.1774  | 11.95598 P | P | P | P | 12.94879 |
| 14.79248 | 14.16055 | 14.66135 | 14.217 P   | P | P | P | 13.43519 |
| 9.349953 | 9.435325 | 11.23435 | 10.04485 P | P | P | P | 9.243436 |
| 7.653407 | 7.454166 | 10.53754 | 9.769254 P | P | P | P | 7.088417 |
| 5.443871 | 4.268796 | 6.567319 | 6.815043 A | P | P | A | 2.776316 |
| 6.631065 |          | 6.740221 | 5.49011 A  |   | A | M | 7.069863 |
| 7.269737 | 6.481316 | 6.798652 | 5.796371 P | A | P | P | 6.687568 |
| 9.13203  | 7.899482 | 8.938356 | 8.627317 P | P | P | P | 8.067515 |
| 11.22455 | 11.0731  | 10.25394 | 10.15707 P | P | P | P | 11.41254 |
| 11.96618 | 12.04    | 11.36329 | 10.85186 P | P | P | P | 11.85435 |
| 7.668332 | 7.912212 | 7.392352 | 6.102554 P | P | P | P | 7.353307 |
| 8.148236 | 6.489603 | 8.589541 | 8.372754 A | A | A | A | 6.551569 |
| 9.634983 | 10.23142 | 8.227114 | 9.085759 P | P | P | P | 9.877199 |
| 9.688719 | 10.31025 | 10.54555 | 11.06465 P | P | P | P | 10.44368 |
| 11.49112 | 12.02245 | 11.14291 | 10.8106 P  | P | P | P | 12.73946 |
| 13.37871 | 13.59921 | 12.57729 | 12.98099 P | P | P | P | 13.87713 |
| 12.29935 | 11.15176 | 12.06289 | 11.37124 P | P | P | P | 11.12546 |
| 6.578937 | 7.286617 | 7.437759 | P          | P | P |   | 6.708654 |
| 11.35914 | 11.45071 | 12.16281 | 12.43916 P | P | P | P | 11.71434 |
|          |          |          | 6.052577   |   |   | A |          |
| 8.289077 | 9.041311 | 8.935179 | 8.808108 P | P | P | P | 8.874831 |
| 6.200089 | 7.540835 | 7.276207 | M          | P | A |   | 7.003692 |
| 7.902377 | 9.160449 | 8.875978 | 9.837766 P | P | P | P | 8.810164 |
| 7.751783 | 8.19599  | 9.222944 | 8.688468 P | P | P | P | 8.215071 |
| 7.192495 | 6.551361 | 6.581228 | 7.790953 P | P | M | A | 7.367946 |
| 9.271264 | 9.7065   | 9.721839 | 8.035646 P | P | P | P | 9.546963 |
| 8.860608 | 8.499833 | 9.878654 | 10.13843 P | P | P | P | 8.307941 |
| 10.7177  | 9.680016 | 10.79107 | 10.24635 P | P | P | P | 9.579568 |
| 9.014056 | 8.901816 | 8.747975 | 7.392997 P | P | P | P | 7.693778 |
|          | 5.802898 |          |            | A |   |   |          |
| 8.538809 | 8.467353 | 10.15658 | 8.721788 P | P | P | P | 7.735407 |
| 7.074578 | 7.1624   | 6.900309 | 5.59483 P  | P | P | P | 7.673809 |
| 7.475077 | 7.487392 | 7.979585 | 2.119397 P | P | P | P | 8.364348 |
| 8.400805 | 8.676467 | 7.621233 | 7.573166 P | P | P | P | 8.499208 |
| 11.88141 | 11.80568 | 11.26415 | 10.14277 P | P | P | P | 11.97758 |
| 10.91001 | 10.92348 | 10.13026 | 9.933133 P | P | P | P | 10.69275 |
| 5.237452 |          | 6.085962 | 6.932337 P |   | A | A | 6.227281 |
| 6.508928 | 7.570936 | 9.337906 | 9.179603 P | A | P | A | 7.656985 |

|          |          |          |          |   |   |   |          |
|----------|----------|----------|----------|---|---|---|----------|
| 9.097446 | 10.36104 | 9.426063 | 8.934753 | P | P | P | 9.911925 |
| 8.621368 | 8.881413 | 10.48792 | 11.01039 | P | P | P | 8.756167 |
|          | 5.568821 | 3.363083 | 2.621061 | A | P | P |          |
| 9.835648 | 11.39849 | 11.37825 | 12.60873 | P | P | P | 12.03588 |
| 9.743575 | 10.82316 | 9.672252 | 8.416002 | P | P | P | 10.43445 |
|          | 4.364527 |          |          | P |   |   |          |
| 7.62571  | 7.197036 | 6.306822 | 6.602626 | P | P | P | 7.780036 |
| 8.707097 | 8.658663 | 8.782529 | 9.075091 | P | P | P | 8.755508 |
| 10.31781 | 9.242319 | 10.0892  | 10.97885 | P | P | P | 9.799513 |
| 8.883255 | 8.592105 | 8.138616 | 9.099572 | P | P | P | 8.75441  |
| 7.436949 | 7.515231 | 6.536488 | 5.991559 | P | P | P | 8.420515 |
| 6.614079 | 6.8289   | 7.390048 | 8.095805 | P | P | A | 6.565732 |
| 11.72314 | 11.43155 | 11.877   | 12.6712  | P | P | P | 12.07332 |
| 12.52667 | 11.99775 | 13.13302 | 12.64363 | P | P | P | 11.25118 |
|          |          | 7.524787 | 8.063807 |   | P | A |          |
| 7.550925 | 7.184413 | 8.065292 | A        | A | A |   | 7.549081 |
| 8.585627 | 8.701487 | 6.887855 | 7.238377 | P | P | P | 8.682223 |
| 8.443727 | 8.43027  | 9.091044 | 8.407921 | P | P | A | 8.084578 |
|          | 5.419021 | 5.468199 |          | P | M |   |          |
| 7.912301 |          | 7.932506 | 9.618452 |   | P | P | 8.978143 |
| 7.740562 | 7.272955 | 8.466267 | 8.758083 | A | P | A | 8.283877 |
| 6.67054  | 5.828996 | 5.758897 | 5.505522 | P | P | P | 6.806838 |
| 7.373336 | 7.126361 | 8.025983 | P        | A | P |   | 6.006515 |
|          | 6.101685 |          |          | P |   |   |          |
| 6.6998   | 4.784926 | 1.83673  | 6.400515 | P | P | P | 5.663245 |
| 5.330899 | 5.943524 | 6.586746 | 5.735264 | A | A | P | 5.551897 |
| 5.087605 | 4.814416 | 6.183494 | 6.188962 | A | P | P | 5.529009 |
| 11.81664 | 9.38612  | 10.84363 | 11.36669 | P | P | P | 8.886813 |
|          | 5.570459 |          |          | A |   |   |          |
| 8.025933 | 6.835472 | 9.43307  | 9.248124 | P | P | P | 7.153903 |
| 10.64555 | 10.57734 | 11.20152 | 11.64508 | P | P | P | 10.73099 |
| 7.823683 | 6.535712 | 7.91318  | 7.267355 | P | P | P | 6.844512 |
| 9.47599  | 8.666341 | 9.870343 | 9.746609 | P | P | P | 8.496904 |
| 10.93543 | 9.634461 | 11.12751 | 11.92001 | P | P | P | 9.988106 |
| 8.376899 | 8.192659 | 9.456074 | 9.790721 | A | A | A | 7.649649 |
| 9.773015 | 9.573631 | 8.51108  | 7.96451  | P | P | P | 9.400696 |
| 5.490439 | 6.779898 | 5.494689 | 6.917418 | P | P | P | 7.243226 |
|          |          |          | 8.387491 |   |   | A |          |
| 8.337574 | 7.861354 | 8.31952  | 8.32391  | P | P | P | 7.760446 |
| 4.061518 | 5.525734 |          | 5.96664  | P |   | P | 5.267195 |

|          |          |          |          |   |   |   |   |          |
|----------|----------|----------|----------|---|---|---|---|----------|
|          |          |          | 6.595365 |   |   |   | A |          |
| 9.097582 | 8.484106 | 8.758281 | 8.451984 | P | P | P |   | 7.678439 |
| 5.929023 | 6.19347  | 5.376624 |          | P | P |   |   | 6.24805  |
| 6.215177 | 6.495364 |          | 7.509757 | P | A |   | P | 6.890287 |
| 9.158591 | 8.958627 | 9.885468 | 10.13236 | P | P | P |   | 9.153211 |
| 11.00656 | 10.85162 | 11.37477 | 10.59163 | P | P | P |   | 10.62255 |
| 6.884154 |          | 6.805486 | 7.832962 | P |   | P | M | 6.651568 |
| 7.334528 | 8.20158  | 7.877021 | 7.536946 | P | P | P |   | 7.660142 |
| 8.371125 | 7.462705 | 8.761509 | 8.858889 | P | P | P |   | 7.807918 |
| 5.774797 | 5.61527  | 6.506369 | 6.060228 | P | P | A |   | 6.992663 |
| 6.576554 | 6.016929 | 6.176631 |          | P | P |   |   | 7.193811 |
| 8.158094 |          | 9.937373 | 10.61031 | A |   | A |   | 7.182342 |
| 5.758418 | 6.189425 | 6.904154 | 6.383895 | P | P | A |   | 6.565109 |
| 6.772202 | 3.471482 | 6.625163 | 5.827592 | P | P | P |   | 7.146079 |
| 12.33066 | 10.64317 | 15.0553  | 14.64292 | P | P | P |   | 10.38074 |
| 8.720144 | 8.106125 | 8.741828 | 8.485911 | P | P | P |   | 8.157504 |
| 10.84561 | 11.10027 | 11.8225  | 12.66093 | P | P | P |   | 11.55503 |
| 5.89752  | 4.69987  |          |          | P |   |   |   | 6.390239 |
|          | 2.826931 | 4.805558 |          | P | P |   |   |          |
| 8.215361 | 7.04642  | 8.483689 | 8.977918 | A | P | A |   | 5.936785 |
| 12.0227  | 11.95136 | 12.48026 | 13.44455 | P | P | P |   | 12.42937 |
| 8.143115 | 7.734963 | 6.848204 | 8.151367 | P | P | P |   | 8.798533 |
| 5.0944   | 5.250354 | 5.677744 | 5.802369 | A | P | P |   | 4.366929 |
| 6.458599 | 4.78682  | 5.996258 | 6.382765 | A | P | P |   | 6.11251  |
|          |          | 4.698448 |          |   | P |   |   |          |
|          | 5.962829 | 7.643498 |          | P | P |   |   |          |
|          | 4.67718  |          |          | P |   |   |   |          |
|          | 4.32832  |          | 5.525207 | P |   | P |   |          |
| 10.38043 | 9.409025 | 10.36069 | 10.08802 | P | P | P |   | 9.264    |
| 6.596111 | 6.39259  | 7.25733  | 6.786575 | P | P | P |   | 6.387374 |
| 7.159191 | 7.16441  | 7.90834  | 8.148284 | A | A | A |   | 4.600383 |
|          |          | 8.178911 |          |   | A |   |   |          |
| 6.222418 | 7.395227 | 7.122221 | 8.160835 | P | P | P |   | 7.748678 |
| 8.635839 | 9.007074 | 9.261686 | 9.793935 | P | P | P |   | 8.644444 |
| 3.420508 |          |          |          | P |   |   |   | 5.45038  |
| 5.975004 |          |          | 7.225341 | A |   | A |   | 3.239744 |
| 6.995649 | 7.426789 | 7.514773 | 8.241346 | P | M | P |   | 8.459134 |
| 6.372708 | 6.614963 | 7.50728  | 7.30343  | P | P | A |   | 7.198326 |
| 6.461499 | 6.46163  | 5.170362 |          | P | P |   |   | 6.283414 |
| 7.047037 | 6.896176 | 6.986267 | 7.611853 | A | P | P |   | 5.894193 |

|          |          |          |          |   |   |   |   |          |
|----------|----------|----------|----------|---|---|---|---|----------|
| 7.349183 | 5.561094 | 6.150034 |          | A | P | P |   | 6.603626 |
| 8.769234 | 9.610101 | 9.172731 | 7.483912 | P | P | P | P | 8.808518 |
| 10.09263 | 9.92567  | 9.404757 | 8.585341 | P | P | P | P | 9.428549 |
| 6.854905 | 4.894068 |          | 5.940095 | P |   |   | P | 6.088905 |
| 5.557821 |          |          | 6.689666 | P |   |   | A | 6.201752 |
|          |          | 7.02529  | 6.777753 |   |   | P | A |          |
| 8.471851 | 9.245058 | 8.12774  | 7.386431 | P | P | P | P | 8.386165 |
| 7.661765 | 8.125933 | 7.451788 | 6.912891 | P | P | P | P | 7.560643 |
| 6.396095 | 6.528976 | 5.926865 | 6.828699 | P | A | P | P | 6.984953 |
| 5.675581 | 4.766969 | 6.522058 | 3.801303 | A | P | P | P | 5.468682 |
|          | 6.160761 |          |          |   | P |   |   |          |
|          |          | 0.819793 |          |   |   | P |   |          |
| 5.765179 | 2.62549  |          |          | A | P |   |   | 5.58884  |
| 6.431889 | 5.255216 | 5.621696 | 6.813622 | P | A | P | P | 5.349407 |
| 6.398275 | 6.574676 | 6.199138 | 6.728474 | P | P | P | P | 5.8925   |
| 9.573564 | 9.44924  | 10.47339 | 11.26299 | P | P | P | P | 9.621209 |
| 4.882245 |          |          | 4.329536 | A |   |   | P | 4.674666 |
| 8.094873 | 7.562253 | 8.337522 | 8.617754 | P | P | P | P | 7.525487 |
| 13.04696 | 12.08048 | 12.18171 | 12.01571 | P | P | P | P | 12.93648 |
| 8.925735 | 8.930159 | 8.686023 | 8.528072 | P | P | P | P | 8.683456 |
| 5.945058 | 5.100846 |          |          | A | P |   |   | 4.178716 |
|          |          | 6.908516 | 7.846979 |   |   | M | A |          |
| 7.336106 | 7.917674 | 7.232035 | 7.315614 | P | P | P | P | 7.16443  |
| 6.718782 | 8.037459 | 7.837869 | 7.497531 | P | P | P | P | 8.12226  |
| 8.832806 | 9.448699 | 9.981151 | 10.99379 | P | P | P | P | 9.693923 |
| 7.565121 | 7.799296 | 7.555513 | 6.712647 | P | P | P | P | 7.933796 |
| 9.666394 | 10.67098 | 10.15089 | 9.599153 | P | P | P | P | 10.18849 |
| 6.328355 |          |          |          | A |   |   |   | 3.091834 |
|          | 2.93678  |          | 5.860835 |   | P |   | P |          |
| 8.703691 | 8.809917 | 10.53007 | 10.5077  | P | P | P | P | 8.803981 |
| 5.493896 | 4.320091 |          | 5.877042 | A | M |   | M | 5.50024  |
| 9.835696 | 9.295366 | 10.1826  | 10.5052  | P | P | P | P | 9.895974 |
| 6.246139 | 6.758955 | 7.8292   | 7.358643 | P | P | A | P | 6.854677 |
| 9.608414 | 8.610176 | 9.953594 | 8.999749 | P | P | P | P | 8.474495 |
| 8.448405 | 8.538768 | 9.747959 | 9.321414 | P | P | P | P | 8.190896 |
| 12.68698 | 11.33562 | 13.48073 | 13.99708 | P | P | P | P | 11.53711 |
| 13.01516 | 11.98135 | 13.94616 | 14.09669 | P | P | P | P | 11.74017 |
| 10.99971 | 9.311079 | 9.95013  | 9.966047 | P | P | P | P | 9.687768 |
| 7.199088 | 7.015643 | 7.538828 | 6.113317 | P | P | P | P | 6.460417 |
|          | 5.385886 | 5.25603  |          |   | P | P |   |          |

|          |          |          |          |   |   |   |          |
|----------|----------|----------|----------|---|---|---|----------|
| 11.49975 | 10.9949  | 10.67226 | 10.8883  | P | P | P | 11.60619 |
| 6.307472 | 5.440459 | 7.452392 | 6.205601 | P | A | P | 6.109261 |
| 10.14276 | 10.46756 | 10.86525 | 11.15449 | P | P | P | 10.63996 |
| 12.29791 | 11.07303 | 12.69311 | 12.76727 | P | P | P | 11.1325  |
| 11.36819 | 11.78043 | 10.95614 | 10.13417 | P | P | P | 11.55513 |
| 10.99305 | 11.38525 | 10.72153 | 10.11    | P | P | P | 11.09433 |
| 10.45918 | 10.78313 | 10.16162 | 9.556728 | P | P | P | 10.56187 |
| 11.04342 | 10.83207 | 11.40729 | 12.71796 | P | P | P | 11.0172  |
| 8.974737 | 9.071339 | 9.985329 | 10.5679  | P | P | P | 9.544642 |
| 13.06468 | 12.67223 | 13.30071 | 13.69616 | P | P | P | 12.82146 |
|          | 6.587918 | 7.083313 | 4.63619  | P | A | P |          |
| 7.602309 | 7.99618  | 8.596696 | 9.792792 | P | P | P | 8.480847 |
| 8.537034 | 8.450007 | 10.28703 | 9.51361  | P | P | P | 8.982348 |
| 9.9707   | 8.661867 | 9.991338 | 9.748075 | P | P | P | 8.100966 |
| 9.297973 | 9.394171 | 9.584012 | 10.45979 | P | P | P | 9.995406 |
| 8.164145 | 6.84543  | 8.130195 | 7.00234  | A | P | A | 6.72922  |
| 10.81442 | 11.03515 | 11.82024 | 12.72675 | P | P | P | 11.12076 |
| 6.761492 |          |          | A        |   |   |   | 4.879798 |
| 11.17265 | 11.07243 | 10.66749 | 10.73668 | P | P | P | 10.86515 |
| 9.310677 | 7.405038 | 8.119295 | 8.794864 | P | P | P | 7.442572 |
| 11.01062 | 11.252   | 9.935325 | 9.509041 | P | P | P | 11.60947 |
| 8.904385 | 8.855358 | 8.885889 | 9.987337 | P | P | P | 8.543065 |
| 11.84128 | 12.48573 | 11.77706 | 11.01176 | P | P | P | 12.18813 |
| 10.99957 | 10.81828 | 10.3594  | 9.771466 | P | P | P | 10.62188 |
| 7.793344 | 7.157343 | 7.259948 | 8.349382 | P | P | P | 5.814026 |
| 6.881991 | 6.400589 |          | 8.362525 | A |   | A | 6.179725 |
| 10.06138 | 10.14668 | 9.547853 | 9.323438 | P | P | P | 9.300486 |
| 10.80603 | 10.40648 | 10.84742 | 10.47059 | P | P | P | 10.06077 |
| 11.40604 | 11.77177 | 10.81969 | 9.958114 | P | P | P | 11.31029 |
| 6.512604 | 6.79592  | 5.448041 | 6.859219 | P | P | P | 7.357288 |
| 7.579356 | 7.980739 | 8.652928 | 7.799233 | P | P | M | 7.764286 |
| 9.84167  | 8.989328 | 8.578877 | 8.339145 | P | P | P | 8.939109 |
| 9.13815  | 9.003446 | 10.32852 | 10.75413 | P | P | P | 8.875049 |
| 9.696799 | 9.090746 | 9.295633 | 9.140034 | P | P | P | 8.328177 |
| 7.579109 | 7.502028 | 6.14721  | A        | P | P |   | 4.904241 |
| 12.60263 | 9.760215 | 11.62451 | 12.1941  | P | P | P | 8.575331 |
| 7.208295 | 7.928589 |          | A        | M |   |   | 8.38391  |
| 6.997138 | 7.586605 | 7.405871 | 6.685654 | P | P | A | 6.576344 |
| 10.75199 | 10.88512 | 10.19751 | 9.87524  | P | P | P | 10.87685 |
|          |          | 5.327686 |          |   | A |   |          |

|          |          |          |          |   |   |   |          |
|----------|----------|----------|----------|---|---|---|----------|
| 10.07703 | 10.37053 | 9.408677 | 9.255509 | P | P | P | 10.14323 |
| 6.237358 | 5.562815 | 5.963117 | 5.380649 | P | P | P | 7.386176 |
| 7.343857 | 8.291568 | 7.824139 | 7.362993 | P | P | P | 7.929548 |
| 9.094394 | 8.614218 | 7.848308 | 8.84047  | A | P | A | 7.598157 |
| 7.995395 | 8.645926 | 7.706995 | 6.848483 | P | P | P | 8.268732 |
| 10.77495 | 10.9351  | 9.950732 | 9.189486 | P | P | P | 10.38135 |
| 7.04316  | 5.675167 | 5.687943 | 5.64578  | P | P | P | 6.84717  |
| 9.893311 | 9.623162 | 10.0279  | 11.28371 | P | P | P | 10.1632  |
| 9.040732 | 9.666904 | 7.786127 | 8.642531 | P | P | P | 9.944614 |
| 7.890101 | 8.16575  | 8.869837 | 9.378089 | P | P | P | 8.224833 |
| 10.01312 | 9.484431 | 10.48426 | 11.6088  | P | P | P | 10.92229 |
| 7.041707 | 7.797807 | 7.543496 | 5.997421 | P | P | P | 7.245813 |
| 6.68834  | 3.993788 | 6.906977 | M        | P | A |   | 6.182902 |
| 11.57704 | 12.33168 | 11.46126 | 10.47506 | P | P | P | 12.03408 |
| 9.451498 | 8.442845 | 9.714043 | 9.939316 | P | P | P | 8.873648 |
| 7.277841 | 7.310149 | 6.877335 | 5.819483 | P | P | P | 6.823942 |
| 8.234653 | 7.762752 | 7.186455 | 7.726453 | P | P | P | 7.05297  |
| 5.431687 |          |          | A        |   |   |   | 3.936661 |
| 10.8537  | 11.5473  | 10.63066 | 9.8338   | P | P | P | 11.29112 |
| 11.20097 | 11.38397 | 10.23549 | 10.21582 | P | P | P | 11.68733 |
| 8.872685 | 9.587744 | 8.24282  | 8.082597 | P | P | P | 9.132963 |
| 6.135655 | 6.272092 |          | 5.275215 | A |   | P | 6.447878 |
| 7.706779 | 6.684448 | 7.702483 | P        | M | A |   | 7.12069  |
|          | 7.413152 | 6.742831 |          | P | P |   |          |
| 6.61603  | 6.563227 | 6.979586 | 7.140122 | P | P | A | 6.419204 |
| 11.42459 | 11.81806 | 10.75333 | 10.28511 | P | P | P | 11.55351 |
| 8.870879 | 8.44259  | 9.708256 | 9.738071 | P | P | P | 8.081436 |
| 9.731916 | 9.242556 | 9.840342 | 8.454823 | P | P | P | 8.789716 |
| 7.981034 | 8.876397 | 6.857627 | 2.770054 | P | P | P | 8.125309 |
| 7.531615 |          | 5.500495 | 7.344457 |   | P | P | 6.615547 |
| 10.91255 | 10.98412 | 11.62821 | 12.06763 | P | P | P | 10.67923 |
| 8.733542 | 8.889239 | 10.09179 | 9.169632 | P | P | P | 8.534965 |
| 8.305734 | 8.116371 | 8.876839 | 8.354658 | P | P | P | 7.806316 |
| 7.273107 | 7.33261  | 7.718705 | 8.743741 | P | M | P | 7.133617 |
|          | 5.164264 |          |          | A |   |   |          |
| 9.184731 | 9.385456 | 9.885757 | 10.42482 | P | P | P | 9.036134 |
| 7.957344 |          | 8.104562 | A        |   | P |   | 7.770804 |
| 7.876856 | 6.500888 | 7.179798 | 8.733885 | P | P | A | 5.878269 |
| 12.14976 | 12.7736  | 11.58385 | 10.57445 | P | P | P | 12.62062 |
| 6.032322 | 6.41221  | 4.509587 | 7.798745 | P | P | P | 7.494853 |

|          |          |          |            |   |   |   |          |
|----------|----------|----------|------------|---|---|---|----------|
| 8.938839 | 8.467479 | 9.515556 | 9.78878 P  | P | P | P | 8.158931 |
| 8.221937 | 8.037326 | 9.247801 | 8.958822 P | P | P | P | 8.093493 |
| 8.794136 | 9.271997 | 9.838847 | 9.87796 P  | P | P | P | 9.179678 |
|          |          |          | 6.609948   |   |   | A |          |
| 6.427674 | 6.867358 | 7.794935 | 8.497531 P | A | M | A | 6.934629 |
| 7.876315 | 7.098802 | 6.499289 | 8.17027 P  | P | P | P | 7.64007  |
| 7.133662 |          | 7.028358 | A          |   | A |   | 4.778789 |
|          | 6.672829 | 7.934104 |            | A | A |   |          |
| 10.07047 | 10.61742 | 10.77088 | 11.17 P    | P | P | P | 10.6645  |
| 6.452762 | 8.089792 | 7.546277 | 6.428817 P | P | P | P | 7.489564 |
| 9.024937 | 9.539094 | 8.596976 | 10.3849 P  | P | P | P | 8.181727 |
| 5.71779  | 6.017521 | 6.907564 | 6.579186 P | A | P | A | 5.944721 |
| 12.44061 | 13.18246 | 12.50509 | 11.71094 P | P | P | P | 13.03972 |
| 9.666998 | 9.111679 | 9.396307 | 10.0998 P  | P | P | P | 9.120147 |
| 7.619441 | 7.272192 | 8.248632 | 8.758772 P | P | P | P | 7.386797 |
| 8.249081 | 7.89889  | 8.88055  | 8.860289 P | P | P | P | 8.000658 |
| 7.842326 | 8.210188 | 8.540947 | 9.639944 P | P | P | A | 8.57905  |
| 7.259955 | 6.992648 | 7.266197 | A          | A | P |   | 6.116849 |
| 7.150351 | 8.442392 | 7.93008  | 5.618097 P | P | P | P | 7.750948 |
| 10.15876 | 9.817549 | 11.07887 | 10.39627 P | P | P | P | 10.17585 |
| 8.175735 | 7.903266 | 6.937131 | 7.039715 P | P | P | P | 6.950674 |
| 7.822766 | 8.062729 | 9.252823 | P          | P | P |   | 8.809321 |
| 11.11224 | 10.07458 | 11.27476 | 11.42387 P | P | P | P | 9.638397 |
| 6.51743  | 6.274958 | 6.39653  | 5.76092 A  | P | P | P | 5.071966 |
| 7.737515 | 7.973096 | 8.433887 | 9.662354 P | P | P | P | 8.51892  |
| 12.65733 | 13.05658 | 13.88338 | 13.90628 P | P | P | P | 12.90347 |
|          | 4.322655 |          |            | M |   |   |          |
| 13.05329 | 11.80925 | 15.98988 | 16.14705 P | P | P | P | 8.84513  |
| 9.613886 | 9.067596 | 9.925591 | 10.17309 P | P | P | P | 9.132402 |
| 12.2541  | 11.30214 | 13.00325 | 13.26749 P | P | P | P | 11.24486 |
| 7.850372 | 6.88859  | 5.614897 | 6.899257 A | P | P | P | 4.565268 |
|          |          |          | 6.301346   |   |   | A |          |
| 5.96878  | 6.570047 | 6.340886 | 4.48282 P  | P | M | P | 6.936384 |
| 9.804227 | 10.58765 | 9.49564  | 9.289639 P | P | P | P | 10.30813 |
| 9.915021 | 10.58063 | 9.59237  | 9.798409 P | P | P | P | 10.22341 |
|          | 5.583146 | 4.164783 |            | A | P |   |          |
| 4.771896 | 5.797502 | 5.629641 | P          | P | P |   | 5.890395 |
| 4.863782 | 5.376039 | 7.944356 | 8.349802 A | A | A | P | 7.949782 |
| 6.45692  | 6.811587 |          | 7.455336 P | P |   | P | 6.594505 |
| 8.248116 | 8.431643 | 6.022646 | 6.507505 P | P | P | P | 8.134288 |

|          |          |          |          |   |   |   |          |
|----------|----------|----------|----------|---|---|---|----------|
| 9.1601   | 9.93447  | 7.652645 | 7.545281 | P | P | P | 9.605092 |
| 6.831782 | 5.619099 | 7.605674 | 7.07547  | P | P | A | 6.599445 |
| 11.58635 | 12.04154 | 11.32675 | 11.43282 | P | P | P | 12.10406 |
| 12.10956 | 12.48956 | 10.76507 | 10.7505  | P | P | P | 11.95393 |
| 9.735407 | 10.43692 | 9.178381 | 7.88045  | P | P | P | 10.15211 |
| 14.20555 | 14.17643 | 13.65595 | 14.06394 | P | P | P | 13.13209 |
| 9.411347 | 10.01787 | 9.665867 | 8.279673 | P | P | P | 9.605368 |
| 7.256441 | 7.595484 |          | M        | A |   |   | 7.515173 |
| 7.479042 | 7.682313 | 7.322363 | 8.108035 | P | P | P | 7.485689 |
| 8.091586 | 8.582808 | 9.292267 | 9.333352 | P | P | P | 8.742513 |
| 8.53435  | 8.632779 | 8.858467 | 9.013066 | P | P | P | 8.822207 |
| 5.939169 | 5.477484 | 5.801499 | 5.16295  | A | A | P | 4.432187 |
| 7.390829 | 8.158925 | 6.780101 | 7.276768 | P | P | P | 7.305308 |
| 10.1185  | 9.74648  | 9.004003 | 8.132473 | P | P | P | 9.620397 |
| 7.670548 | 8.261578 | 7.674544 | 6.896284 | P | P | P | 7.572109 |
| 12.67657 | 11.14811 | 13.54528 | 13.97951 | P | P | P | 11.86181 |
| 8.359836 | 8.40236  | 9.128417 | 9.21072  | P | P | P | 8.651583 |
| 10.13933 | 9.417252 | 10.24876 | 10.59936 | P | P | P | 9.648503 |
| 10.07599 | 9.03663  | 10.28183 | 9.452627 | P | P | P | 8.571305 |
|          |          | 6.839327 | 7.194363 |   | A | A |          |
| 9.078129 | 7.978383 | 9.22358  | 9.301279 | P | P | P | 7.935568 |
| 10.70456 | 10.60215 | 11.54035 | 12.29093 | P | P | P | 11.01331 |
| 11.18703 | 10.68249 | 13.3249  | 12.86415 | P | P | P | 10.37397 |
| 6.675928 | 7.087102 | 6.924246 | 7.296092 | P | P | A | 6.410785 |
| 8.922731 | 9.466209 | 8.018497 | 8.746927 | P | P | P | 9.387246 |
|          |          | 7.651097 |          |   | A |   |          |
| 9.740965 | 9.949881 | 10.31572 | 11.0543  | P | P | P | 9.88541  |
| 8.574545 | 8.197537 | 8.426625 | 8.280175 | P | P | P | 6.745254 |
| 6.687938 | 5.657121 | 5.904586 | 6.630263 | P | P | P | 5.780613 |
| 7.100662 | 6.557152 | 7.760107 | 8.090527 | P | P | P | 7.560033 |
| 10.32246 | 11.39194 | 8.787781 | 9.406846 | P | P | P | 11.72501 |
|          | 4.752997 | 5.083513 |          | P | P |   |          |
| 9.240452 | 10.635   | 7.308261 | 7.777694 | P | P | P | 10.42276 |
| 10.36544 | 10.69473 | 10.9816  | 11.93698 | P | P | P | 10.84525 |
| 6.882832 | 7.543435 | 5.997192 | 7.533331 | P | P | P | 7.906734 |
| 9.89437  | 10.18594 | 11.0292  | 11.79542 | P | P | P | 10.68102 |
| 8.182136 | 8.10715  | 9.173468 | 9.4159   | P | P | P | 8.688261 |
| 5.801876 | 5.695939 | 6.682427 | A        | P | A |   | 6.474222 |
| 9.399319 | 9.253604 | 9.319862 | 9.771008 | P | P | P | 9.681232 |
| 9.157966 | 9.903139 | 7.51821  | 7.42388  | P | P | P | 9.453629 |



|          |          |          |          |   |   |   |          |
|----------|----------|----------|----------|---|---|---|----------|
| 8.100679 | 7.785307 | 8.748166 | 8.698108 | P | P | P | 8.003692 |
| 7.618133 | 7.024061 | 8.081133 | 8.381374 | A | A | A | 6.063232 |
| 6.171127 | 6.009069 | 5.782744 | 5.495213 | A | P | P | 6.241859 |
| 10.16448 | 10.80431 | 9.729175 | 8.986346 | P | P | P | 10.27753 |
| 8.266931 | 7.541326 | 8.335575 | 7.374466 | P | P | P | 6.360966 |
| 7.916495 | 8.728799 | 7.720918 | 7.247307 | P | P | P | 9.042181 |
| 8.909487 | 8.898487 | 7.814093 | 6.98841  | P | P | P | 9.406603 |
| 8.910931 | 8.522278 | 9.347005 | 9.85905  | P | P | P | 8.739194 |
| 8.506628 | 7.387097 | 9.035024 | 8.131419 | P | P | P | 7.671299 |
| 7.736712 | 7.003916 | 6.899975 | 6.277179 | P | P | P | 6.586982 |
|          |          |          | 2.688098 |   |   | M |          |
| 9.525171 | 9.996273 | 10.84905 | 11.18674 | P | P | P | 9.797906 |
|          | 5.413832 | 6.517981 | 6.967923 | A | A | A |          |
| 11.78844 | 11.96711 | 11.03324 | 10.85575 | P | P | P | 11.78004 |
| 6.880146 | 6.999686 | 7.072833 | 8.493738 | P | P | P | 7.702014 |
| 11.7623  | 11.57243 | 11.82104 | 10.96361 | P | P | P | 10.75523 |
| 10.67397 | 10.41905 | 9.823441 | 9.023149 | P | P | P | 10.04451 |
| 7.175058 | 7.228604 | 7.930413 | 8.515199 | P | M | P | 7.145908 |
| 5.379461 | 4.016173 | 5.954646 | 5.844058 | A | A | P | 5.27619  |
| 7.059383 | 6.467859 | 7.015916 | 7.197869 | P | P | P | 7.044584 |
| 7.318711 |          | 8.171268 | 7.49528  | P | A | P | 7.255805 |
|          |          | 3.629183 |          |   | P |   |          |
| 8.336058 | 9.267599 | 8.408702 | 7.214832 | P | P | P | 8.965241 |
| 9.735425 | 8.423677 |          | 9.572155 | A |   | M | 9.182878 |
| 7.989472 | 7.814803 | 8.686089 | 8.947256 | P | P | P | 8.068049 |
| 10.45047 | 9.976468 | 10.71236 | 11.02751 | A | M | P | 9.611486 |
| 7.305022 | 6.983193 | 7.529356 | 8.287824 | P | P | P | 7.12721  |
| 10.07632 | 9.271362 | 9.650164 | 9.386234 | P | P | P | 9.027599 |
| 6.311743 | 7.304072 | 7.77943  | 6.99997  | P | P | P | 7.017535 |
| 7.000609 |          | 6.373056 | 5.780352 | A | P | P | 6.553634 |
| 11.12001 | 9.950806 | 11.16167 | 11.24708 | P | P | P | 10.08566 |
| 10.28049 | 9.009182 | 10.27314 | 9.855028 | P | P | P | 8.848288 |
| 10.20505 | 9.81211  | 9.399672 | 9.343866 | P | P | P | 9.939552 |
| 8.305079 | 7.273468 | 7.696121 | 6.91491  | P | P | P | 7.771204 |
| 8.061058 | 8.946851 | 7.89074  | 8.360714 | P | P | P | 8.449412 |
| 9.690558 | 10.40308 | 9.679818 | 8.903957 | P | P | P | 10.36143 |
| 7.39265  | 5.909097 | 7.53912  | 8.429158 | P | P | P | 5.870562 |
| 10.47944 | 8.983406 | 10.23212 | 9.8638   | P | P | P | 8.670997 |
|          | 7.030921 |          |          | A |   |   |          |
| 5.248657 | 5.233557 | 2.82239  | 5.768801 | P | P | P | 5.518492 |

|          |          |          |          |   |   |   |          |
|----------|----------|----------|----------|---|---|---|----------|
| 11.83808 | 11.70427 | 12.33621 | 13.66917 | P | P | P | 12.11865 |
| 7.996543 | 9.421426 | 8.822419 | 8.628933 | P | P | P | 9.097123 |
| 7.939251 | 8.399735 | 8.265832 | 8.529365 | P | P | P | 7.775123 |
| 6.73011  | 6.381035 | 6.918683 | 8.33532  | P | P | A | 7.012202 |
| 8.826844 | 9.864054 | 10.16935 | 9.247988 | P | P | P | 11.5966  |
|          | 5.121825 |          | 7.162986 | A |   | P |          |
| 8.149501 | 7.622415 | 7.464625 | 7.536861 | P | P | P | 8.320793 |
| 9.089534 | 9.814638 | 10.0089  | 9.283838 | P | P | P | 8.733399 |
| 11.47736 | 11.77802 | 10.67437 | 10.53484 | P | P | P | 11.39259 |
| 8.665839 | 9.307502 | 9.732121 | 9.757714 | P | P | P | 8.951227 |
| 10.00818 | 10.86513 | 9.963035 | 9.170853 | P | P | P | 10.21047 |
| 6.176114 | 5.05308  |          | P        | P |   |   | 5.918692 |
| 7.026198 | 7.111709 | 6.600877 | 6.492035 | P | P | P | 6.858678 |
| 6.178804 | 5.96808  | 7.380346 | 6.525478 | P | P | P | 5.439561 |
| 9.787001 | 10.23016 | 9.707455 | 9.294725 | P | P | P | 10.05114 |
| 10.00487 | 9.319512 | 10.87014 | 10.38425 | P | P | P | 8.504    |
| 5.869807 | 6.889547 | 4.886914 | P        | P | P |   | 6.903296 |
| 7.932454 | 7.240675 | 8.174163 | 8.76154  | A | A | P | 7.902629 |
| 9.269923 | 7.288154 | 8.29808  | 8.493127 | P | P | P | 7.95556  |
| 6.316669 | 5.815498 | 6.396582 | 7.154286 | P | P | P | 7.394868 |
| 9.085073 | 8.860123 | 8.793654 | 8.349013 | P | P | P | 8.682091 |
| 7.088193 | 6.93638  | 6.519132 | 7.128117 | P | P | P | 7.84459  |
| 8.921884 | 9.079021 | 9.039905 | 7.975991 | P | P | P | 8.930755 |
| 5.375703 | 4.244625 |          | A        | P |   |   | 6.002408 |
| 6.844668 | 6.553395 | 7.397893 | 7.335506 | P | P | P | 6.98768  |
| 7.522406 | 7.360317 | 7.970552 | 9.682007 | P | P | P | 7.475203 |
| 8.00388  | 7.223622 | 8.094905 | 8.143594 | P | P | P | 8.289208 |
| 7.385963 | 8.327561 | 6.663857 | 7.521522 | P | P | P | 7.764514 |
| 12.31526 | 11.94867 | 11.89854 | 10.99487 | P | P | P | 12.24553 |
| 12.59811 | 12.99729 | 11.57136 | 10.94423 | P | P | P | 12.61417 |
| 10.10661 | 10.05467 | 10.90764 | 11.15101 | P | P | P | 10.45071 |
| 6.372786 | 6.078313 | 7.218507 | A        | P | A |   | 5.216969 |
| 7.466283 | 6.02599  | 5.751193 | 7.234044 | P | P | P | 7.068915 |
| 6.720657 | 5.370925 | 6.78301  | 6.462579 | P | P | A | 5.698885 |
|          |          | 4.987863 | 4.328288 |   | P | P |          |
| 7.05026  | 6.867845 | 6.417804 | 7.540985 | A | P | P | 7.211118 |
| 6.494896 | 4.262081 | 6.6411   | 6.661038 | M | A | P | 5.651534 |
| 11.18106 | 11.74965 | 12.08875 | 12.38638 | P | P | P | 11.61911 |
| 7.573339 | 7.082439 | 7.139635 | 7.807959 | P | P | A | 7.380957 |
| 5.452681 | 6.588876 | 6.787894 | 7.234084 | P | P | A | 5.764414 |

|          |          |          |          |   |   |   |   |          |
|----------|----------|----------|----------|---|---|---|---|----------|
| 9.81536  | 8.288685 | 10.26697 | 9.899603 | A | M | P | A | 6.747986 |
| 6.932561 | 6.324482 | 5.812883 | 7.016505 | A | P | P | P | 6.547465 |
| 7.116132 | 6.667064 | 5.404026 | 7.111618 | P | P | P | P | 6.99322  |
| 9.441765 | 9.638313 | 9.251317 | 9.049567 | P | P | P | P | 10.07519 |
| 9.438644 | 9.021882 | 10.93638 | 10.86888 | P | P | P | P | 8.807234 |
| 8.497438 | 9.152169 | 10.33498 | 11.22292 | P | P | P | P | 9.417037 |
| 8.301285 | 8.368953 | 7.546143 | 7.481798 | P | P | P | P | 7.98798  |
| 10.52387 | 10.77206 | 9.953307 | 9.780134 | P | P | P | P | 10.5754  |
| 8.554244 | 9.304778 | 8.170017 | 7.842087 | P | P | P | P | 8.503013 |
| 8.962271 | 8.45765  | 9.784308 | 9.930596 | P | P | P | P | 8.779068 |
| 7.231017 | 5.613401 | 6.977144 | 7.045428 | A | P | A | P | 4.44052  |
| 7.412851 | 7.977595 | 9.400592 | 9.392413 | P | P | P | P | 8.132567 |
| 10.98939 | 10.86624 | 10.48358 | 10.01352 | P | P | P | P | 10.5047  |
| 12.0996  | 11.11054 | 12.99558 | 13.18047 | P | P | P | P | 11.01759 |
| 6.604547 | 6.585327 | 6.0975   | P        | A | P |   |   | 6.712843 |
| 8.737119 | 9.033142 | 8.349909 | 8.172305 | P | P | P | P | 8.582969 |
| 10.37187 | 9.407304 | 11.17736 | 11.52175 | P | P | P | P | 9.89109  |
| 5.847597 | 5.729352 | 5.997957 | P        | P | P |   |   | 6.918827 |
| 6.115559 | 6.14737  | 6.602439 | M        | P | P |   |   | 6.550687 |
| 9.937462 | 9.286727 | 10.71077 | 10.5795  | P | P | P | P | 9.464714 |
| 7.074759 | 6.795886 | 8.928407 | 7.59332  | M | A | P | A | 6.83782  |
| 8.427669 | 8.436236 | 7.08643  | 6.769923 | P | P | P | P | 8.11849  |
| 6.829372 | 6.294561 | 2.868123 | 6.045012 | P | P | P | P | 6.662094 |
|          | 5.428366 | 5.76235  |          | A | A |   |   |          |
| 5.67393  | 5.108696 | 7.129841 | 7.377948 | P | P | A |   | 6.80252  |
| 10.34317 | 9.900833 | 9.65653  | 9.092161 | P | P | P | P | 9.626545 |
| 8.474483 | 7.984775 | 9.018464 | 8.150889 | P | P | P | P | 7.740584 |
| 8.161134 | 7.662134 | 8.210101 | 8.858896 | P | P | P | P | 7.500231 |
| 9.1406   | 9.869798 | 8.546863 | 7.377093 | P | P | P | P | 9.795294 |
| 7.313938 | 7.414256 | 5.632305 | 5.849144 | P | P | P | P | 7.185905 |
| 7.711813 | 8.197269 | 8.851511 | 8.390966 | P | P | P | P | 7.738161 |
| 8.818627 | 8.329126 | 8.75758  | 7.958323 | A | P | P | M | 7.234084 |
| 10.88213 | 11.63158 | 10.74293 | 10.22245 | P | P | P | P | 11.32527 |
| 8.518248 | 7.727565 | 7.19849  | 7.257372 | P | P | P | P | 7.761499 |
| 7.180207 | 8.252283 | 7.572989 | 4.851005 | P | P | P | P | 7.143934 |
| 4.280891 | 1.718412 |          | A        | P |   |   |   | 5.470659 |
| 8.240811 | 8.573757 | 8.366765 | 8.485462 | P | P | P | P | 9.539625 |
| 4.512254 | 5.605427 | 6.678027 | 6.753424 | P | P | A |   | 6.307176 |
| 8.885611 | 8.259526 | 8.462763 | 9.058079 | P | P | P | P | 7.815192 |
| 7.340826 | 7.138109 | 8.484889 | 7.765155 | P | M | P | P | 7.921012 |

|          |          |          |          |   |   |   |   |          |
|----------|----------|----------|----------|---|---|---|---|----------|
| 7.242974 | 7.876075 | 7.065103 |          | P | P | P |   | 8.252426 |
| 7.616644 | 7.122703 | 7.61218  |          | P | P | P |   | 6.556389 |
|          | 4.865979 | 5.390379 |          |   | A | P |   |          |
| 10.07396 | 10.53708 | 9.257435 | 8.687775 | P | P | P | P | 10.1296  |
| 13.31132 | 12.33915 | 13.04142 | 12.8302  | P | P | P | P | 11.74412 |
| 7.584309 | 7.329295 | 7.07346  | 6.008134 | P | P | P | P | 6.849385 |
| 7.276712 | 6.411599 | 7.611971 | 6.942718 | P | P | P | P | 5.981102 |
| 7.101868 | 6.38963  | 7.706359 | 7.788914 | P | P | P | P | 6.46444  |
| 6.293689 | 6.961585 | 8.772357 | 8.395561 | P | P | P | A | 7.132396 |
| 6.399088 | 5.999011 | 6.721919 | 5.091964 | P | P | A | P | 7.12542  |
| 8.313682 | 8.410936 | 8.125924 | 7.58229  | P | P | P | P | 7.309697 |
| 10.36585 | 10.18035 | 9.907349 | 8.58313  | P | P | P | P | 9.772448 |
| 11.0337  | 10.70464 | 11.80597 | 12.78472 | P | P | P | P | 11.04574 |
|          | 8.562226 |          |          | P |   |   |   |          |
| 8.574153 | 9.053493 | 9.803973 | 9.334229 | P | P | P | P | 9.499702 |
| 8.903758 | 8.149983 | 9.34523  | 8.729797 | P | P | P | P | 8.047221 |
| 10.36012 | 10.56222 | 11.23012 | 11.12024 | P | P | P | P | 10.49532 |
| 9.218378 | 8.805711 | 9.226705 | 8.512203 | P | P | P | P | 8.216294 |
|          | 4.098266 |          |          | P |   |   |   |          |
| 9.012215 | 9.171803 | 7.219592 | 8.233254 | P | P | P | P | 8.914595 |
| 6.682007 | 6.207216 | 6.655592 | 6.854313 | A | P | P | P | 5.765369 |
| 7.139751 |          | 7.392893 |          |   | A |   |   | 6.966765 |
| 10.09537 | 10.06469 | 10.90343 | 11.73824 | P | P | P | P | 10.69992 |
| 6.960043 | 7.462843 | 5.843275 |          | P | P |   |   | 6.364253 |
| 11.81937 | 12.59509 | 11.75772 | 10.64576 | P | P | P | P | 12.38038 |
| 6.811713 | 7.083313 | 5.436159 | 4.079657 | P | P | P | P | 6.484867 |
| 9.329628 | 9.224669 | 8.549938 | 8.338987 | P | P | P | P | 9.368916 |
| 8.531846 | 8.88322  | 7.991607 | 7.658646 | P | P | P | P | 8.633075 |
| 7.500819 | 7.528915 | 7.233334 | 7.273786 | P | P | P | P | 7.980676 |
| 6.328585 | 6.270179 | 5.839906 | 6.647936 | A | P | P | P | 6.783568 |
| 7.186126 | 7.14183  | 8.076205 | 5.435926 | P | P | P | P | 6.299805 |
| 10.99837 | 11.14644 | 10.18037 | 9.958307 | P | P | P | P | 10.94974 |
| 9.285466 | 10.08715 | 10.456   | 10.84299 | P | P | P | P | 10.36353 |
| 8.261714 | 9.234262 | 7.411161 | 8.626676 | P | P | P | P | 8.988604 |
|          |          |          | 7.651375 |   |   |   | A |          |
| 9.439498 | 9.242042 | 10.01456 | 9.836902 | P | P | P | P | 9.059662 |
| 8.46432  | 8.287823 | 7.862225 | 7.343871 | P | P | P | P | 8.321281 |
| 11.46057 | 10.83701 | 12.38923 | 11.73627 | P | P | P | P | 10.86442 |
| 6.845748 | 7.00569  | 7.451284 | 8.369896 | A | P | A |   | 5.735836 |
| 5.048163 | 7.152124 | 6.365903 |          | P | P |   |   | 5.083408 |

|          |          |          |          |   |   |   |   |          |
|----------|----------|----------|----------|---|---|---|---|----------|
| 4.895154 | 3.388383 |          |          | A | M |   |   | 5.068761 |
| 10.13847 | 9.347008 | 10.44858 | 8.762697 | P | P | P | P | 8.965036 |
| 9.056253 | 9.4225   | 7.823422 | 7.624274 | P | P | P | P | 9.46642  |
| 9.61788  | 8.210049 | 9.485403 | 9.798913 | P | P | P | P | 8.8655   |
| 8.189919 | 10.06193 | 7.563584 | 8.073457 | P | P | P | P | 8.547914 |
| 6.575741 | 6.456183 |          | 7.39314  | P | M |   | A | 6.523112 |
| 8.696768 | 8.860836 | 9.134561 | 8.756218 | P | P | P | P | 8.417926 |
| 9.306073 | 9.047709 | 9.933855 | 9.562406 | P | P | P | P | 8.542026 |
|          |          | 1.120427 |          |   |   | P |   |          |
| 6.428155 | 7.458838 | 8.564034 | 8.56206  | P | P | P | P | 6.685794 |
| 8.857581 | 8.52967  | 6.96029  | 7.296948 | P | P | P | P | 9.254297 |
| 10.95112 | 10.87445 | 10.59151 | 10.01199 | P | P | P | P | 10.74715 |
| 8.786104 | 8.038934 | 8.727186 | 9.427323 | P | P | P | P | 9.093549 |
|          | 4.946298 |          |          |   | A |   |   |          |
| 6.050904 |          | 2.929971 |          |   |   | P |   | 6.472772 |
| 7.542129 | 7.212188 | 6.333688 | 7.119944 | P | P | P | P | 8.144709 |
|          |          |          | 6.021566 |   |   |   | A |          |
| 7.243598 | 6.293121 | 7.296463 | 7.040708 | P | P | P | P | 6.123341 |
| 10.38082 | 8.162724 | 9.934329 | 10.39673 | P | P | P | P | 8.429383 |
| 10.33987 | 10.77805 | 11.46585 | 10.83252 | P | P | P | P | 11.01595 |
| 9.653783 | 9.542724 | 7.062062 | 8.557957 | P | P | P | P | 9.630228 |
| 7.15968  | 6.446437 | 7.294271 | 8.432558 | P | A | P | P | 7.42615  |
| 8.422592 | 8.170223 | 9.558261 |          |   | A | P |   | 8.039112 |
| 6.959494 | 5.981957 | 7.377063 | 7.782628 | P | P | P | P | 7.355192 |
| 11.07481 | 11.15184 | 11.78421 | 12.07138 | P | P | P | P | 11.11526 |
| 6.018723 | 5.375598 |          |          |   | A |   |   | 5.200891 |
| 8.61411  | 9.089139 | 10.18288 | 10.17076 | P | P | P | P | 8.938941 |
| 8.045951 | 6.822516 | 5.786352 | 6.591969 | A | P | P | P | 5.599104 |
| 5.460251 | 5.45957  | 4.776196 | 6.731039 | A | A | P | A | 5.405555 |
|          | 5.293245 |          |          |   | M |   |   |          |
| 11.43733 | 11.30609 | 12.09732 | 12.34678 | P | P | P | P | 11.29187 |
| 7.923758 | 8.572332 | 9.282662 | 9.809314 | P | P | P | P | 8.157018 |
| 9.179832 | 8.118986 | 9.098169 | 9.537364 | P | P | P | P | 8.86296  |
|          |          |          | 6.804801 |   |   |   | A |          |
| 8.578023 | 7.972802 | 8.02436  | 7.596862 | P | M | P | A | 8.217166 |
| 7.727564 | 7.919622 | 6.726886 | 7.645537 | P | P | P | P | 8.611347 |
| 6.755548 | 7.310376 | 6.137726 | 5.298425 | P | P | P | P | 7.342754 |
| 8.491441 | 8.805207 | 8.296398 | 8.181869 | P | P | P | P | 7.838424 |
| 6.72271  | 6.547785 | 6.006046 | 8.086238 | P | A | A | P | 6.755054 |
|          |          | 7.558781 | 8.367731 |   |   | A | A |          |

|          |          |          |            |   |   |   |          |
|----------|----------|----------|------------|---|---|---|----------|
|          | 7.476533 | 3.467744 |            | P | P |   |          |
| 8.375649 | 7.590309 | 8.713041 | 8.897927 P | P | P | P | 7.934639 |
| 7.962955 | 6.863631 | 6.97959  | P          | P | P |   | 7.61023  |
| 10.12362 | 8.649594 | 9.030913 | 8.759152 P | P | P | P | 8.847549 |
| 6.809463 | 5.841891 | 5.023958 | 5.480618 P | A | P | P | 4.805738 |
| 7.321323 | 6.280914 | 7.82924  | 7.431471 A | P | P | P | 6.978046 |
| 11.67144 | 10.52928 | 12.23993 | 12.68571 P | P | P | P | 10.39677 |
| 6.976916 | 7.205028 | 7.969951 | 8.145757 P | P | P | P | 6.681923 |
| 10.76512 | 10.27045 | 9.569921 | 9.701869 P | P | P | P | 10.20396 |
| 7.595167 | 7.161829 | 6.982051 | 8.10962 P  | P | P | P | 7.889635 |
| 9.145652 | 8.299202 |          | 9.66357 A  | P |   | P | 8.961208 |
| 10.89926 | 11.00848 | 10.5302  | 9.820233 P | P | P | P | 10.9583  |
| 7.089129 | 6.746727 | 7.756366 | 8.32803 A  | P | A | P | 7.425601 |
|          | 3.994869 |          | 3.227343   | P |   | M |          |
| 10.67893 | 9.474839 | 9.545105 | 9.841318 P | P | P | P | 10.10051 |
| 8.475288 | 6.91161  | 8.940136 | 7.368424 P | A | P | P | 6.321561 |
|          | 2.068955 |          |            | M |   |   |          |
| 9.799281 | 10.48228 | 10.34132 | 9.954084 P | P | P | P | 10.74524 |
| 6.62508  | 6.209053 | 5.942737 | 7.605904 P | P | P | P | 7.44673  |
| 13.33757 | 13.67549 | 12.52391 | 13.16951 P | P | P | P | 13.86278 |
| 10.78771 | 11.20902 | 11.69379 | 11.51625 P | P | P | P | 11.63071 |
| 13.30057 | 11.53699 | 13.90558 | 14.41878 P | P | P | P | 11.14569 |
| 9.745872 | 9.583349 | 10.79763 | 11.06094 P | P | P | P | 10.02391 |
| 7.229079 | 6.390029 | 7.244124 | 8.040344 P | P | P | P | 6.956197 |
| 10.8507  | 9.729813 | 8.989726 | 9.999887 A | P | P | P | 4.032696 |
| 5.712442 | 6.566627 | 6.467308 | 7.161065 A | A | M | P | 5.39969  |
| 8.676496 | 8.480869 | 7.614319 | 7.417439 P | P | P | P | 8.183388 |
| 7.991873 | 6.997324 | 8.786716 | 8.608142 P | P | P | P | 5.74535  |
| 8.510428 | 8.786694 | 9.13171  | 8.851632 P | P | P | P | 8.458996 |
| 10.38288 | 8.758044 | 9.868663 | 9.522303 P | P | P | P | 7.788188 |
| 8.512054 | 7.939722 | 7.746144 | 7.872557 P | P | P | P | 8.385028 |
| 7.192643 | 5.440423 | 6.516233 | A          | A | A |   | 4.85573  |
| 10.06404 | 8.813196 | 10.15615 | 11.16432 P | P | P | P | 8.86139  |
| 9.637515 | 9.193607 | 9.613231 | 10.75149 P | P | P | P | 9.292988 |
| 9.69247  | 8.959578 | 7.938146 | 7.337028 P | P | P | P | 9.124867 |
| 10.92536 | 10.91345 | 10.04152 | 9.847138 P | P | P | P | 10.53666 |
| 8.133576 | 8.362239 | 7.687307 | 7.511205 P | P | P | P | 8.016562 |
| 10.15076 | 10.30565 | 9.383988 | 9.547144 P | P | P | P | 9.926177 |
| 7.507752 | 7.578254 | 7.516036 | 4.33953 A  | P | P | P | 7.173514 |
| 7.023494 | 7.374607 | 6.649029 | 6.409042 P | P | P | P | 7.687455 |

|          |          |          |          |   |   |   |   |          |
|----------|----------|----------|----------|---|---|---|---|----------|
| 6.460995 | 6.119109 | 7.919214 | 7.659703 | A | A | P | P | 5.734116 |
| 6.345532 | 7.46151  | 5.60391  | 6.114523 | P | P | P | P | 6.802361 |
| 6.075081 | 6.01243  | 3.75838  | P        | P | P |   |   | 6.550596 |
| 7.914669 | 7.488472 | 9.16056  | 8.853582 | P | A | P |   | 7.559431 |
| 9.304608 | 8.65618  | 10.00611 | 9.808656 | P | P | P |   | 9.202263 |
| 6.070216 | 5.498262 | 7.276847 | P        | P | P |   |   | 6.045117 |
| 5.237756 | 4.48744  |          | 6.085006 | A |   | A |   | 0.888028 |
| 5.808727 | 5.714918 | 6.333403 | 6.546239 | P | A | A | P | 6.173154 |
| 8.19807  | 9.151507 | 8.395699 | 6.702606 | P | P | P | P | 8.419537 |
| 6.068962 | 7.18605  | 6.576433 | 6.569031 | P | P | P | P | 6.859589 |
| 10.06501 | 9.88654  | 9.271285 | 8.726192 | P | P | P | P | 9.691061 |
| 9.356949 | 9.572397 | 10.16653 | 9.423833 | P | P | P | P | 8.873331 |
| 9.285216 | 10.34062 | 8.800901 | 9.969969 | P | P | P | P | 10.61723 |
| 8.868851 | 8.736878 | 9.573712 | 9.176662 | P | P | P | P | 8.536907 |
| 11.87191 | 12.1793  | 12.70827 | 12.34239 | P | P | P | P | 12.29775 |
| 7.280299 | 6.693534 | 10.48806 | 10.36616 | P | P | P | P | 7.639839 |
| 9.949298 | 10.0745  | 10.80561 | 11.11877 | P | P | P | P | 9.969231 |
| 7.652628 | 7.428634 | 8.388927 | 8.085855 | P | M | A |   | 8.103902 |
| 6.813777 | 6.050302 | 6.004562 | 7.292858 | P | A | P | P | 6.378277 |
| 8.853378 | 8.383842 | 9.829606 | 11.24178 | P | P | P | P | 8.773452 |
| 8.241076 | 7.449159 | 9.03664  | 8.690784 | P | P | P | P | 7.725636 |
| 8.217946 | 7.993902 | 8.246043 | 8.446976 | P | P | P | P | 7.784946 |
| 10.3404  | 9.142822 | 10.32149 | 10.57814 | P | P | P | P | 9.974541 |
| 5.132687 | 4.842456 | 7.123854 | 7.964677 | A | P | P | A | 5.107162 |
| 7.869402 | 7.286496 | 9.006714 | 9.435483 | P | P | P | P | 7.331129 |
|          |          | 8.136083 | 8.835657 |   |   | A | A |          |
| 8.125935 | 8.54889  | 9.101778 | 9.331154 | P | P | P | P | 9.229143 |
| 10.97933 | 11.50373 | 10.78291 | 10.06915 | P | P | P | P | 11.40649 |
| 12.79181 | 12.65017 | 12.06794 | 11.57426 | P | P | P | P | 12.655   |
| 5.038795 |          |          | M        |   |   |   |   | 6.543953 |
| 10.84218 | 10.71715 | 11.29012 | 11.55696 | P | P | P | P | 10.90493 |
| 6.260442 | 6.065266 | 5.98195  | P        | A | P |   |   | 6.626602 |
| 4.71689  |          | 4.732631 | A        |   | P |   |   | 4.058636 |
|          |          | 7.808583 |          |   | M |   |   |          |
| 7.063991 | 7.436535 | 7.56209  | 8.536408 | P | P | P | P | 8.134177 |
| 7.703591 | 7.940677 | 8.4863   | 8.383153 | P | P | P | P | 8.578528 |
| 8.493722 | 9.06353  | 6.802762 | 10.61183 | P | M | P |   | 9.130974 |
| 5.409485 |          |          | P        |   |   |   |   | 6.453472 |
| 7.268992 | 6.66395  | 8.070995 | 7.06309  | P | P | P |   | 7.603484 |
|          | 0.797342 |          |          | P |   |   |   |          |

|          |          |          |          |   |   |   |          |
|----------|----------|----------|----------|---|---|---|----------|
| 10.95903 | 11.5739  | 11.88837 | 12.20224 | P | P | P | 11.53573 |
| 9.219134 | 8.168163 | 8.759275 | 8.412495 | P | P | P | 8.44997  |
| 5.026168 | 6.04166  | 4.307624 |          | P | P |   | 7.063888 |
| 8.142418 | 7.0376   | 7.368797 | 7.700347 | P | P | P | 7.685804 |
|          | 5.229139 |          | 7.061343 | P |   | A |          |
| 8.650966 | 9.06144  | 9.303925 | 8.714199 | P | P | P | 8.342755 |
| 8.07521  | 7.091069 | 7.970151 | 7.835224 | P | P | P | 6.82314  |
| 10.37399 | 11.11886 | 10.35767 | 9.595155 | P | P | P | 10.66526 |
| 5.944214 | 3.502462 |          | P        | P |   |   | 6.415888 |
|          |          |          | 7.695497 |   |   | A |          |
| 8.372189 | 6.851259 | 7.80477  | 8.459474 | P | P | P | 7.455716 |
| 8.277558 | 7.405956 | 5.484557 | 7.451947 | P | P | P | 7.815282 |
| 6.634527 | 6.657094 | 5.049716 | 6.416297 | P | P | P | 6.126198 |
| 11.15897 | 11.22598 | 10.13033 | 10.19852 | P | P | P | 10.91685 |
| 10.22318 | 8.917783 | 9.577969 | 9.157689 | P | P | P | 8.99036  |
| 9.59654  | 10.24599 | 10.70202 | 10.96189 | P | P | P | 9.770294 |
| 6.139084 | 6.654609 | 6.014058 | 6.633382 | P | P | P | 6.327979 |
|          |          |          | 3.177367 |   |   | M |          |
| 5.189731 | 4.862553 |          | P        | P |   |   | 5.259532 |
| 6.47659  | 7.324945 | 6.878174 | 6.736094 | P | P | P | 7.642555 |
| 6.567328 |          | 7.153365 | 6.788684 |   | P | A | 6.118454 |
| 8.121475 | 6.762324 | 8.721814 | 9.011737 | P | P | P | 7.324138 |
| 7.203899 | 9.3701   | 6.852383 | 6.604469 | P | P | P | 8.845936 |
| 11.63611 | 12.45853 | 11.45804 | 10.63669 | P | P | P | 12.16601 |
| 9.926021 | 8.687862 | 7.455142 | 8.589663 | P | P | P | 1.620997 |
| 11.50544 | 12.09743 | 11.44844 | 10.45087 | P | P | P | 11.69233 |
| 11.08602 | 12.34385 | 11.37952 | 10.549   | P | P | P | 11.8275  |
| 8.053595 | 8.249022 | 7.48995  | 7.301256 | P | P | P | 6.789883 |
| 11.07933 | 10.50993 | 9.841289 | 10.97327 | P | P | P | 11.52809 |
| 12.27795 | 12.02279 | 11.06683 | 11.17488 | P | P | P | 11.87772 |
| 8.899058 | 8.520093 | 9.605551 | 9.276653 | P | P | P | 8.651904 |
| 7.749017 | 6.042728 | 7.613502 | 8.529325 | P | P | P | 6.890878 |
| 12.14064 | 12.32134 | 12.61584 | 13.28807 | P | P | P | 12.52079 |
|          | 2.683732 |          |          | P |   |   |          |
| 5.080707 | 1.792875 | 5.925139 | 6.955936 | P | M | A | 2.389396 |
| 7.554139 | 7.046825 |          | A        | A |   |   | 4.383873 |
| 11.1953  | 11.30894 | 11.34594 | 10.87182 | P | P | P | 11.69157 |
| 8.015713 | 8.020653 | 7.438409 | 6.488357 | P | P | P | 7.855802 |
| 11.01024 | 11.21797 | 10.26097 | 9.46029  | P | P | P | 10.78696 |
| 11.44617 | 11.3326  | 9.520545 | 9.379132 | P | P | P | 11.10366 |



|          |          |          |          |   |   |   |          |
|----------|----------|----------|----------|---|---|---|----------|
| 13.55743 | 13.35107 | 12.14796 | 12.14475 | P | P | P | 14.09962 |
| 10.85792 | 11.2699  | 11.57301 | 12.20816 | P | P | P | 11.38263 |
|          | 5.951363 | 7.799251 | 8.126818 | A | A | A |          |
| 7.149063 | 7.937426 | 6.220748 | P        | P | P |   | 5.549749 |
| 4.284284 | 4.148403 | 4.531053 | P        | P | A |   | 4.932655 |
| 6.448282 | 6.349456 | 3.7136   | 4.857219 | P | P | P | 5.934319 |
| 7.122247 | 5.695894 | 7.337404 | 7.60128  | P | P | P | 7.509631 |
| 7.839109 | 8.219546 | 8.142678 | 8.534546 | P | P | P | 7.788907 |
| 12.64496 | 12.00227 | 13.0547  | 14.12502 | P | P | P | 12.90068 |
| 7.734237 | 6.102482 | 7.844335 | 6.965015 | P | P | M | 6.945332 |
| 12.43885 | 13.00101 | 12.49541 | 11.83573 | P | P | P | 12.8705  |
|          | 5.382499 | 6.577378 | 6.880124 | A | A | A |          |
| 8.319411 | 8.764931 | 8.546902 | 8.6957   | P | P | P | 8.597519 |
| 5.245198 | 4.865677 | 5.796478 | M        | A | A |   | 5.054406 |
| 11.32677 | 10.72932 | 11.70449 | 11.96544 | P | P | P | 10.46201 |
| 5.730791 | 6.428661 | 6.216999 | 6.284421 | P | P | P | 6.91064  |
| 7.790385 | 6.783318 | 9.112323 | 7.111823 | P | P | P | 8.012011 |
| 8.326496 | 7.042555 | 6.885502 | 7.092846 | P | P | P | 7.252357 |
| 8.342329 |          |          | 9.540465 |   |   | A | 8.556004 |
| 6.812551 |          | 7.581573 | 7.423053 |   | A | A | 6.166779 |
| 7.159558 | 6.450096 | 7.014169 | 4.41304  | P | P | P | 6.616605 |
| 10.31085 | 10.37484 | 9.679316 | 9.544221 | P | P | P | 10.91862 |
| 8.236382 | 8.013956 | 7.5313   | 6.897566 | P | P | P | 8.084314 |
| 11.19952 | 10.74743 | 10.33905 | 9.663064 | P | P | P | 10.43584 |
| 8.132736 | 7.698299 | 8.639516 | 8.567203 | P | P | P | 7.54407  |
| 7.200563 | 6.608469 | 8.132214 | 8.136603 | P | P | P | 6.824671 |
| 8.960162 | 9.308633 | 10.72109 | 10.3942  | P | P | P | 9.052899 |
| 6.014216 | 5.762638 | 6.263931 | 6.807522 | P | P | A | 5.291462 |
| 10.33817 | 9.97831  | 10.42567 | 11.6698  | P | P | P | 10.4196  |
| 7.972126 | 7.465761 | 8.68223  | 8.765788 | M | P | A | 7.478744 |
| 12.63936 | 11.82712 | 12.91478 | 13.94107 | P | P | P | 12.40567 |
| 7.61659  | 6.521772 | 7.963607 | 8.298496 | P | P | P | 7.36427  |
| 11.60594 | 11.88497 | 10.90886 | 10.91753 | P | P | P | 11.98724 |
| 9.87813  | 10.48032 | 9.476438 | 10.29071 | P | P | P | 9.388168 |
| 11.66219 | 11.33396 | 10.82711 | 10.8656  | P | P | P | 11.18882 |
| 6.863834 | 6.535175 | 7.706029 | A        | P | A |   | 5.021234 |
| 7.811525 |          |          | 8.809706 |   |   | A | 7.168755 |
| 9.740692 | 8.913748 | 10.33532 | 9.80817  | P | P | P | 8.785127 |
| 12.02893 | 10.68194 | 12.63366 | 12.66939 | P | P | P | 11.62373 |
| 7.80954  | 7.062347 | 7.177756 | 6.649828 | P | P | P | 6.57111  |

|          |          |          |            |   |   |   |          |
|----------|----------|----------|------------|---|---|---|----------|
| 14.99724 | 15.59384 | 12.08268 | 13.92703 P | P | P | P | 15.82923 |
| 7.934512 | 7.064242 | 7.699547 | 8.53897 P  | P | P | P | 7.197656 |
| 8.247474 | 7.933346 | 7.695624 | 5.897446 P | P | P | P | 8.165716 |
| 7.609324 | 7.680613 | 9.273965 | 8.406738 P | P | P | P | 8.660203 |
| 8.77761  | 7.718769 | 7.769244 | 7.979636 A | P | P | P | 7.1647   |
| 7.449486 | 7.22609  | 7.862398 | 8.363428 M | P | P | P | 7.331764 |
| 5.611135 | 6.016127 | 4.858032 | 6.096684 P | P | P | P | 5.580846 |
| 10.386   | 11.55948 | 10.65299 | 11.10016 P | P | P | P | 11.44893 |
| 7.575349 | 7.213229 | 5.654741 | 8.12473 A  | M | M | A | 8.020312 |
| 10.63139 | 10.44202 | 10.38284 | 9.698629 P | P | P | P | 10.3088  |
| 11.09826 | 11.50413 | 12.26818 | 12.83637 P | P | P | P | 11.76945 |
| 5.830751 | 6.131384 | 6.067083 | P          | A | P |   | 5.814121 |
| 7.340156 | 7.291377 | 7.678933 | 8.337843 P | A | P | M | 7.253603 |
| 9.34248  | 8.633953 | 9.661674 | 9.357395 P | P | P | P | 8.313493 |
| 9.807528 | 9.540401 | 10.5565  | 11.18183 P | P | P | P | 10.13513 |
| 5.936199 | 6.319816 | 6.114721 | 0.865548 P | P | P | P | 5.506691 |
| 10.91655 | 10.87565 | 9.890738 | 9.51488 P  | P | P | P | 10.6839  |
| 8.533105 | 9.674418 | 8.039983 | 6.978983 P | P | P | P | 8.846906 |
| 10.56831 | 9.770409 | 11.0509  | 11.38171 P | P | P | P | 10.02232 |
| 8.149473 | 8.314538 | 6.186568 | 7.481935 P | P | P | P | 8.168615 |
| 10.42081 | 9.75948  | 9.530299 | 9.53367 P  | P | P | P | 9.398409 |
| 8.078594 | 7.65184  | 7.185912 | 6.78661 P  | P | P | P | 7.355386 |
| 8.624722 | 7.917094 | 8.265524 | 7.613045 P | P | P | P | 6.856512 |
| 8.319444 | 8.408308 | 8.051458 | 7.95383 P  | P | P | P | 8.46884  |
| 5.929831 | 6.097265 | 7.010751 | 6.273346 M | P | P | A | 7.301886 |
| 11.59135 | 13.69013 | 6.954032 | 9.66444 P  | P | P | P | 14.05216 |
| 12.84499 | 12.45932 | 12.70629 | 12.56188 P | P | P | P | 11.86832 |
|          | 5.070286 |          |            | A |   |   |          |
| 10.20865 | 9.771391 | 9.965613 | 9.401127 P | P | P | P | 9.911301 |
| 7.368261 | 6.838765 | 8.036598 | A          | P | P |   | 6.419365 |
| 11.53619 | 11.20944 | 11.36941 | 11.14062 P | P | P | P | 10.7862  |
| 7.638841 | 6.191616 | 8.30654  | 6.738625 M | P | A | P | 5.841535 |
|          |          | 4.506009 |            |   |   | M |          |
|          | 4.518918 |          |            | A |   |   |          |
| 8.924099 | 8.123031 | 9.10929  | 10.12804 P | P | P | P | 8.733356 |
| 7.079695 | 5.961587 | 7.25654  | 5.894329 P | P | P | P | 7.20987  |
| 7.860755 | 6.888688 | 8.031372 | 7.963782 P | A | P | P | 8.670427 |
| 7.516184 | 7.753365 | 6.960922 | 5.948154 P | P | P | M | 7.064685 |
| 11.27052 | 11.838   | 11.76905 | 11.0731 P  | P | P | P | 11.20632 |
| 7.562976 | 7.354045 | 8.776163 | 8.462266 P | P | P | P | 6.982771 |

|          |          |          |            |   |   |   |          |
|----------|----------|----------|------------|---|---|---|----------|
| 5.837894 |          | 6.667344 | 6.673847 M |   | P | P | 7.286033 |
| 8.516594 | 6.766975 | 8.419086 | 8.242909 P | P | P | P | 7.463295 |
| 5.473467 | 6.064153 | 6.044107 | 4.008676 P | P | P | P | 5.62744  |
| 5.804599 | 5.557127 |          | 6.628654 P | M |   | A | 7.100334 |
| 8.505815 | 7.747303 | 9.082875 | 9.30178 A  | A | A | A | 7.28989  |
|          | 4.362511 |          |            | P |   |   |          |
| 9.046965 | 9.5186   | 8.71627  | 8.725909 P | P | P | P | 9.380824 |
| 10.61139 | 10.35675 | 11.07967 | 12.21118 P | P | P | P | 11.14855 |
| 12.26366 | 11.6179  | 13.15619 | 13.49669 P | P | P | P | 11.74221 |
| 6.754516 | 6.140556 | 6.81778  | 7.640589 P | P | P | A | 7.323906 |
| 10.07247 | 9.567016 | 9.914949 | 10.71794 P | P | P | P | 9.566134 |
| 10.04564 | 9.587455 | 11.07883 | 10.65243 P | P | P | P | 9.823855 |
| 8.169278 | 9.364909 | 8.423604 | 7.962013 P | P | P | P | 8.117463 |
| 8.082624 | 7.778197 | 8.851653 | 8.596519 P | P | P | P | 8.362953 |
| 13.80521 | 13.17437 | 11.68393 | 12.89161 P | P | P | P | 13.83724 |
| 6.963043 | 7.656662 | 8.987756 | 7.868004 P | P | P | M | 6.054048 |
| 6.066767 | 6.806608 | 4.798961 | 3.965048 P | P | P | P | 6.860625 |
| 7.556343 | 9.027173 | 8.020799 | 6.991032 P | P | P | P | 8.673579 |
| 7.483845 | 7.020869 | 8.801221 | 9.267399 P | A | A | P | 6.379738 |
| 12.31943 | 11.67115 | 12.64816 | 12.24944 P | P | P | P | 11.89161 |
| 8.564675 | 7.348202 | 8.144829 | 7.792363 P | P | P | P | 6.678352 |
| 8.40449  | 9.278191 | 8.235149 | 8.617833 P | P | P | P | 8.678634 |
| 6.385146 |          |          | P          |   |   |   | 7.495743 |
| 12.00543 | 11.13814 | 11.02615 | 11.291 P   | P | P | P | 12.09774 |
| 11.99463 | 12.53264 | 12.03333 | 10.75348 P | P | P | P | 12.37086 |
| 10.11695 | 9.91313  | 10.87401 | 11.15818 P | P | P | P | 10.24878 |
| 9.141519 | 8.110795 | 9.123317 | 8.8124 P   | P | P | P | 8.030156 |
| 8.177985 | 8.14083  | 7.739484 | 7.720428 P | P | P | P | 7.928924 |
| 6.462132 | 7.998863 | 6.763456 | 7.137735 P | P | P | P | 7.215419 |
| 12.21834 | 11.12762 | 11.9644  | 11.62034 P | P | P | P | 10.61557 |
| 7.897331 | 7.380693 | 8.878846 | 8.541832 A | P | P | P | 7.40386  |
| 7.464022 | 8.269018 | 8.064365 | 6.61012 P  | P | P | P | 8.840478 |
| 10.46962 | 10.30474 | 9.686326 | 9.2674 P   | P | P | P | 10.19009 |
| 9.808108 | 9.291948 | 9.06336  | 8.723466 P | P | P | P | 9.5789   |
| 11.64514 | 11.94818 | 11.97336 | 12.65224 P | P | P | P | 11.86278 |
| 9.914794 | 8.916923 | 9.236394 | 8.574885 P | P | P | P | 8.813241 |
| 9.110277 | 8.632833 | 8.171392 | 7.720975 P | P | P | P | 8.626851 |
| 7.409414 | 8.514766 | 7.807261 | 7.068595 P | P | P | P | 7.588935 |
| 8.807711 | 8.628369 | 9.691382 | 9.312638 P | P | P | P | 8.19618  |
| 9.694431 | 9.870151 | 9.750546 | 10.05022 P | P | P | P | 9.887121 |

|          |          |          |          |   |   |   |   |          |
|----------|----------|----------|----------|---|---|---|---|----------|
| 7.615964 | 6.327009 | 7.884974 | 7.718368 | P | A | P | P | 6.081753 |
| 8.632615 | 9.216629 | 9.534414 | 9.538802 | P | M | M | P | 8.796922 |
| 6.834855 | 7.12213  | 6.834725 | 7.459349 | P | A | A | A | 6.304678 |
| 9.900261 | 8.343702 | 8.365247 | 7.598819 | P | P | P | P | 8.79408  |
| 10.94882 | 11.67847 | 10.30745 | 10.53396 | P | P | P | P | 11.47993 |
| 4.841977 | 4.909338 |          | 3.724371 | P |   |   | P | 6.137008 |
| 7.769722 | 6.523778 | 7.289241 | 5.32258  | A | P | P | P | 7.08082  |
| 6.535871 | 6.884383 | 7.009279 | 6.755857 | P | A | A | A | 7.096389 |
| 7.876177 | 6.66618  | 7.573664 | 7.391576 | P | A | P | A | 8.023226 |
|          |          |          | 7.007527 |   |   |   | A |          |
| 7.36599  | 6.972008 |          | 6.855036 | P |   |   | P | 6.353804 |
| 11.70133 | 10.19422 | 11.89348 | 10.86162 | P | P | P | P | 9.227978 |
| 8.177993 | 5.885077 | 8.621054 | 9.1224   | P | P | M |   | 7.383078 |
| 6.066526 | 6.192895 |          | 7.404364 | A |   | A |   | 6.351969 |
|          | 5.730921 |          |          | P |   |   |   |          |
|          |          | 5.066499 |          |   |   | P |   |          |
| 11.95856 | 9.444302 | 12.32389 | 11.86805 | P | P | P | P | 8.7715   |
| 8.784013 | 7.952374 | 8.089301 | 7.82781  | P | P | P | P | 8.010834 |
| 12.48126 | 11.83053 | 12.52626 | 12.31494 | P | P | P | P | 12.20921 |
| 10.98324 | 10.2628  | 9.818454 | 9.497911 | P | P | P | P | 9.863692 |
| 10.94127 | 10.35582 | 11.28981 | 11.76441 | P | P | P | P | 10.71048 |
| 5.554729 | 1.923864 |          | 6.744089 | P |   |   | P | 6.69828  |
| 9.809622 | 9.681455 | 10.75825 | 11.56573 | P | P | P | P | 9.523387 |
|          | 3.950747 | 6.416619 | 6.972632 | P | P | A |   |          |
| 8.546867 | 7.619663 | 10.03008 | 9.384246 | P | P | P | P | 8.523925 |
| 7.491398 | 7.272543 | 8.164266 | 8.559391 | P | P | P | P | 7.335974 |
| 7.476078 | 6.876496 | 8.53101  | 8.547603 | P | P | P | P | 9.024893 |
| 10.67765 | 10.46348 | 10.20337 | 9.446544 | P | P | P | P | 10.41173 |
| 11.01198 | 11.38996 | 10.47552 | 10.67937 | P | P | P | P | 11.16183 |
| 9.264037 | 8.256739 | 8.108164 | 8.015877 | P | P | P | P | 7.8268   |
| 7.688661 | 6.055718 | 8.090465 | 6.653423 | A | P | A |   | 5.837975 |
| 8.674943 | 9.150614 | 8.49632  | 8.008615 | P | P | P | P | 8.348216 |
| 10.47475 | 10.92953 | 9.880942 | 9.351957 | P | P | P | P | 10.36445 |
| 13.00842 | 13.1571  | 12.0928  | 11.6932  | P | P | P | P | 12.88923 |
|          | 4.672898 |          |          | A |   |   |   |          |
|          |          | 6.59414  |          |   |   | A |   |          |
|          | 5.225236 | 1.526788 |          | P |   | P |   |          |
|          |          | 3.05231  |          |   |   | P |   |          |
| 6.449421 | 7.764233 | 5.712289 | A        | P | P |   |   | 4.675515 |
| 9.965241 |          | 10.00649 | 10.26827 | A |   | P | M | 7.491473 |

|          |          |          |            |   |   |   |          |
|----------|----------|----------|------------|---|---|---|----------|
|          |          |          | 6.749551   |   |   | P |          |
| 11.7659  | 11.93955 | 11.35462 | 10.40472 P | P | P | P | 11.75993 |
| 9.258071 | 7.870567 | 9.659841 | 10.85576 P | P | P | P | 8.594306 |
| 7.581725 | 7.75989  | 7.998235 | 8.972563 P | P | P | P | 8.384498 |
| 6.696052 | 7.015101 | 7.355262 | 7.31061 A  | P | P | P | 6.358433 |
| 7.181212 | 6.627539 | 6.991596 | A          | P | M |   | 4.210958 |
| 9.509275 | 9.907858 | 9.040516 | 8.54009 P  | P | P | P | 10.045   |
| 8.601295 | 8.067313 | 8.767447 | 9.041986 M | P | A | P | 8.240688 |
| 8.045995 | 7.205231 | 6.235832 | 7.164169 P | P | P | P | 6.917418 |
| 8.85464  | 8.667912 | 8.719478 | 9.486593 P | P | P | P | 8.803348 |
| 8.75227  | 8.619913 | 7.761411 | 8.390753 P | P | P | P | 8.814948 |
| 10.87318 | 11.20066 | 10.42551 | 9.94502 P  | P | P | P | 11.25355 |
| 9.437953 | 8.894661 | 8.858634 | 10.25347 P | P | P | P | 10.8299  |
| 10.60311 | 10.92444 | 9.9791   | 9.677434 P | P | P | P | 10.97116 |
| 6.363647 | 5.971836 |          | 5.20113 A  | P |   | P | 5.115466 |
| 11.7319  | 12.37449 | 12.1623  | 13.1791 P  | P | P | P | 12.13731 |
| 6.303234 | 6.079305 | 5.188935 | 7.977505 A | A | A | A | 6.151984 |
| 5.414526 |          |          | A          |   |   |   | 4.412568 |
| 10.94036 | 10.85763 | 10.63418 | 11.3501 P  | P | P | P | 10.91517 |
| 7.226844 | 8.811267 | 7.769053 | 6.931994 P | P | P | P | 7.603916 |
| 10.21556 | 10.16247 | 11.18443 | 10.61654 P | P | P | P | 10.08164 |
| 10.72921 | 11.08194 | 10.51595 | 9.519937 P | P | P | P | 11.13318 |
| 10.7279  | 9.723619 | 10.74274 | 10.0565 P  | P | P | P | 9.456441 |
| 9.079895 | 9.182088 | 10.65236 | 10.90278 P | P | P | P | 9.301964 |
| 6.787943 | 6.495171 | 6.639422 | P          | P | P |   | 7.192286 |
| 9.368131 | 8.065528 | 9.139095 | 8.98736 P  | P | P | P | 9.264578 |
| 9.240885 | 10.38331 | 9.659567 | 8.7881 P   | P | P | P | 10.70566 |
| 8.858512 | 8.610826 | 5.11845  | 7.180607 P | P | P | P | 8.602138 |
| 6.945167 | 6.994623 | 5.775472 | 3.839179 P | P | P | P | 6.148321 |
| 6.035559 | 6.135656 | 5.589925 | 5.219823 P | P | P | P | 6.859862 |
| 12.1538  | 10.55898 | 11.12009 | 10.72079 P | P | P | P | 10.32634 |
| 11.06317 | 12.23825 | 11.62536 | 12.11928 P | P | P | P | 12.10735 |
| 6.808984 | 6.994169 | 8.231844 | 8.839842 P | P | P | P | 7.657909 |
| 6.028009 | 6.718302 | 6.846512 | 3.996055 P | P | P | M | 6.521248 |
| 10.67471 | 10.81456 | 10.13656 | 10.06379 P | P | P | P | 10.92905 |
| 8.979574 | 8.142622 | 8.434084 | 8.92335 P  | P | P | P | 8.893974 |
| 6.788952 | 6.730758 | 6.449729 | 7.627898 P | P | P | P | 7.441244 |
| 6.321412 | 3.01419  | 3.842323 | 6.219663 P | P | P | P | 6.724321 |
| 9.748432 | 10.64355 | 10.61379 | 10.50969 P | P | P | P | 10.61443 |
| 8.387126 | 7.451849 | 9.161504 | 8.910151 P | P | P | P | 7.971398 |

|          |          |          |          |   |   |   |          |
|----------|----------|----------|----------|---|---|---|----------|
| 11.54979 | 11.27013 | 10.35061 | 11.48095 | P | P | P | 12.04654 |
| 6.663348 | 6.190247 | 2.692629 | 7.380989 | P | P | P | 6.665266 |
| 5.151398 | 4.465956 | 5.921547 | 6.414651 | A | P | P | 5.533132 |
| 13.11404 | 13.77528 | 12.58899 | 12.07043 | P | P | P | 13.38933 |
| 6.674049 | 7.139222 | 7.157856 | 7.139521 | P | P | P | 6.838905 |
| 11.9367  | 11.52102 | 12.62192 | 12.41092 | P | P | P | 10.89876 |
| 7.007611 | 7.205728 | 8.346139 | A        | P | P |   | 6.517887 |
| 9.828131 | 10.19341 | 9.131775 | 8.423879 | P | P | P | 9.92821  |
| 6.532559 | 6.250314 | 6.608382 | 8.96097  | A | P | P | 5.385668 |
| 11.80576 | 11.97718 | 11.21977 | 10.74402 | P | P | P | 11.63581 |
| 5.755518 | 6.080857 | 1.561441 | P        | P | P |   | 6.064321 |
| 6.810347 | 6.307114 | 2.909047 | 2.899495 | A | P | P | 4.721934 |
| 13.15145 | 12.89821 | 13.16417 | 13.62757 | P | P | P | 12.99826 |
| 10.89735 | 10.28246 | 10.05559 | 9.648505 | P | P | P | 9.78917  |
| 8.187299 | 8.415777 | 7.45777  | P        | P | P |   | 6.943666 |
| 8.441431 | 7.570424 | 8.643019 | 7.734026 | P | P | P | 8.238318 |
| 9.627451 | 8.907062 | 8.917781 | 7.678761 | P | P | P | 8.615989 |
|          | 6.324489 | 7.957549 | 7.943409 | A | A | A |          |
| 8.305579 | 9.243903 | 9.561161 | 9.556576 | P | P | P | 9.807574 |
| 9.188982 | 9.100722 | 9.193746 | 8.337412 | P | P | P | 9.156225 |
| 12.47326 | 12.90796 | 11.94175 | 11.62416 | P | P | P | 12.63308 |
| 5.827635 | 5.68842  | 6.377707 | A        | A | A |   | 4.706358 |
| 12.00413 | 13.29905 | 13.06959 | 12.07147 | P | P | P | 13.18209 |
| 7.671921 | 7.133591 | 6.633273 | 6.081081 | A | P | P | 6.292491 |
| 10.33351 | 11.18158 | 9.650114 | 9.712792 | P | P | P | 10.75771 |
| 5.808291 | 5.957524 | 6.321702 | 6.639416 | P | A | P | 6.275421 |
| 11.79652 | 11.96239 | 11.28789 | 11.18677 | P | P | P | 11.96031 |
| 9.467925 | 9.279595 | 10.31605 | 9.717798 | P | P | P | 7.942694 |
| 7.081877 | 7.8268   | 7.711153 | 7.0005   | P | A | A | 7.589748 |
| 8.077654 | 7.596574 | 9.54706  | 9.152569 | A | P | P | 7.407373 |
| 11.08314 | 11.3057  | 9.675267 | 9.776449 | P | P | P | 11.14372 |
|          | 4.944177 |          |          | A |   |   |          |
| 9.7206   | 10.19876 | 9.882029 | 8.636066 | P | P | P | 9.754193 |
| 8.134033 | 7.450928 | 7.813435 | 7.506038 | P | P | P | 7.018211 |
| 7.894112 | 7.768589 | 8.925064 | 8.955791 | P | P | P | 7.637072 |
| 13.28831 | 13.59105 | 12.90381 | 12.19661 | P | P | P | 13.25218 |
|          | 5.046805 |          | 5.571737 | P |   | P |          |
| 11.2579  | 12.19295 | 11.72117 | 10.86908 | P | P | P | 12.14933 |
| 8.94846  | 8.034326 | 9.099299 | 9.027061 | P | P | A | 8.509513 |
|          | 6.869359 | 7.944354 | 8.501637 | P | P | P |          |

|          |          |          |          |   |   |   |          |
|----------|----------|----------|----------|---|---|---|----------|
| 9.766687 | 10.68245 | 10.712   | 9.005293 | P | P | P | 10.19999 |
| 6.57943  |          |          | A        |   |   |   | 4.42017  |
| 9.906755 | 10.01326 | 8.918033 | 8.66329  | P | P | P | 9.971292 |
| 9.212843 | 8.309048 | 9.296235 | 9.105637 | P | P | M | 8.335346 |
| 6.826754 |          |          | 8.11949  | P |   | A | 8.026975 |
| 5.923338 | 5.952854 | 7.470584 | 9.068934 | P | A | P | 6.475485 |
| 6.56869  | 6.23709  | 7.620569 | 8.482461 | P | M | P | 7.062472 |
| 8.796934 | 8.541788 | 7.60531  | 6.908217 | P | P | P | 8.044783 |
| 5.642929 | 2.55355  |          | 1.465823 | A |   | M | 6.001738 |
|          |          | 5.220707 |          |   | A |   |          |
| 6.735345 | 5.463276 | 4.269306 | 6.51226  | P | P | P | 6.524721 |
| 6.837759 | 7.021201 | 7.493255 | 7.380113 | P | P | P | 7.266099 |
| 9.682705 | 8.875814 | 9.387027 | 8.671822 | P | P | P | 8.600415 |
| 7.870939 | 8.187634 | 4.840879 | 6.940428 | P | P | P | 6.695993 |
| 7.202181 | 7.391728 | 7.037426 | 7.056068 | P | P | P | 7.363055 |
| 6.748642 | 6.518915 |          | M        | P |   |   | 7.846206 |
|          |          | 5.975235 |          |   |   | A |          |
| 6.722951 | 6.357441 | 5.902195 | 7.520415 | A | P | A | 6.3717   |
|          |          | 8.637531 | 9.4482   |   | A | A |          |
|          |          | 2.561872 |          |   | P |   |          |
|          | 6.743063 | 4.755918 |          | A | P |   |          |
| 7.418    | 7.442851 | 7.621985 | 8.178438 | P | P | A | 7.785817 |
| 13.4976  | 13.33715 | 11.9591  | 11.53206 | P | P | P | 13.58958 |
| 7.472336 | 6.814889 | 7.80904  | 7.886384 | A | P | P | 6.8536   |
|          | 4.268613 |          |          | M |   |   |          |
| 7.040852 | 7.86642  | 7.258073 | 8.695456 | P | P | P | 8.447316 |
|          | 5.02664  |          |          | A |   |   |          |
| 7.895846 | 8.556029 | 8.086505 | 8.594305 | P | P | P | 9.756418 |
| 7.296455 | 7.722419 | 5.90584  | 6.353141 | P | P | P | 8.438819 |
| 6.128192 | 5.270035 | 5.306657 | A        | A | P |   | 5.867013 |
| 5.908601 |          |          | 7.276201 | P |   | M | 7.723268 |
| 11.90795 | 12.17757 | 11.45119 | 10.79235 | P | P | P | 11.9293  |
| 7.726244 | 6.588412 | 7.303927 | 5.836449 | P | P | P | 6.600677 |
| 6.507065 | 5.969679 | 5.727059 | 7.340058 | P | P | P | 7.088511 |
| 7.506366 |          |          | A        |   |   |   | 5.832572 |
| 8.817334 | 9.217293 | 8.811214 | 8.225654 | P | P | P | 9.292935 |
| 11.40595 | 10.76279 | 10.18444 | 9.935892 | P | P | P | 10.6165  |
| 8.470408 | 8.368872 | 7.786929 | 9.250492 | M | P | P | 8.811546 |
| 9.337425 | 9.276044 | 8.289743 | 8.759157 | P | P | P | 9.176548 |
| 5.767046 | 5.629614 |          | 6.56031  | A |   | A | 1.459952 |

|          |          |          |          |   |   |   |   |          |
|----------|----------|----------|----------|---|---|---|---|----------|
| 4.320559 | 6.625149 | 6.990204 | 7.471922 | P | A | A | A | 6.564756 |
| 6.757025 |          | 7.717221 |          | A |   | A |   | 5.854136 |
| 6.424503 | 6.000821 | 6.243521 | 4.049541 | P | P | P | P | 6.472488 |
| 8.482982 | 8.67192  | 6.442952 | 7.510225 | P | P | P | P | 8.619246 |
| 6.945377 | 6.440006 | 6.880283 | 7.697241 | P | P | P | P | 7.199972 |
| 8.840303 | 8.637723 | 9.522703 | 8.931465 | P | P | P | P | 8.538218 |
|          |          |          | 6.267993 |   |   |   | A |          |
| 9.139848 | 9.167882 | 7.919018 | 8.854929 | P | P | P | P | 8.984758 |
|          | 4.717514 |          | 6.66814  | P |   |   | A |          |
| 7.822142 | 6.942987 | 8.734655 | 8.97206  | P | P | P | P | 7.423289 |
|          |          | 5.966897 |          |   | A |   |   |          |
| 6.799856 | 5.610863 | 5.748755 | 7.245423 | P | P | P | P | 7.409204 |
| 6.457027 | 6.02103  | 5.312242 | 5.534083 | P | P | P | P | 6.237886 |
| 5.57165  | 6.050148 |          | 7.292014 | M |   |   | A | 6.282083 |
| 6.641449 | 6.345379 | 6.530892 | 7.072221 | P | P |   | A | 5.847889 |
|          |          |          | 6.829286 |   |   |   | A |          |
| 9.030476 | 9.073893 | 10.28462 | 10.36379 | P | P | P | P | 8.991333 |
| 7.018499 | 6.392765 | 7.435815 | 7.471265 | P | P | P | P | 7.798803 |
| 12.0621  | 12.50453 | 11.38703 | 11.43056 | P | P | P | P | 12.22247 |
|          | 2.108181 |          | 3.360078 | P |   |   | P |          |
|          |          |          | 6.800821 |   |   |   | P |          |
| 6.970034 | 6.473492 | 4.996333 | 5.889641 | P | P | P | P | 6.485408 |
| 2.263509 |          |          | P        |   |   |   |   | 6.152845 |
| 9.781514 | 9.323088 | 10.33538 | 10.3144  | P | P | P | P | 9.587297 |
| 9.708283 | 9.36044  | 10.89942 | 10.60224 | P | P | P | P | 9.214607 |
| 4.682951 | 5.799076 | 6.102717 | 3.781313 | P | P | P | P | 5.929884 |
| 5.99337  |          | 7.868722 | 7.768524 |   | A | A | A | 7.028381 |
| 8.691338 | 8.426157 | 8.925259 | 9.728797 | P | P | P | P | 8.502828 |
| 5.472816 | 5.457178 |          | A        | A |   |   |   | 1.919663 |
| 6.965685 |          | 7.69307  | A        |   | A |   |   | 7.460126 |
|          | 4.655959 | 6.467112 |          | P | M |   |   |          |
| 10.13703 | 9.728982 | 9.006483 | 8.889514 | P | P | P | P | 9.621534 |
| 4.496335 | 7.330692 | 6.038319 | 2.356617 | P | P | P | P | 6.776292 |
|          | 5.829497 |          |          | A |   |   |   |          |
| 6.668161 | 6.325303 | 6.11951  | 6.300157 | A | P | P | A | 6.086798 |
|          | 7.072368 | 8.730351 | 9.206309 | P | P | P | P |          |
| 7.336322 | 7.969114 | 6.103567 | 7.960035 | P | A | P | P | 8.326489 |
| 10.98944 | 10.4023  | 10.7678  | 11.30289 | P | P | P | P | 11.16656 |
| 12.66874 | 11.90334 | 11.19332 | 11.42241 | P | P | P | P | 12.6111  |
| 9.21673  | 8.780048 | 11.05613 | 10.91035 | P | P | P | P | 8.466186 |



|          |          |          |            |   |   |   |          |
|----------|----------|----------|------------|---|---|---|----------|
| 8.202052 | 7.927924 | 8.417603 | 9.203818 P | P | P | P | 8.085425 |
| 8.907857 | 8.602013 | 9.948508 | 8.996498 P | P | P | P | 8.352661 |
|          | 2.8133   | 5.300084 |            | P | P |   |          |
| 7.576687 | 8.383101 | 8.000678 | 8.505456 P | P | A | P | 8.658755 |
|          |          | 6.34349  |            |   |   | A |          |
|          | 6.615673 |          |            | P |   |   |          |
| 9.460487 | 9.924646 | 8.348298 | 8.519098 P | P | P | P | 10.09515 |
|          | 4.67779  | 6.622706 |            | P | P |   |          |
| 9.689682 | 10.22761 | 9.210195 | 8.66803 P  | P | P | P | 9.625758 |
| 9.49507  | 8.657491 | 9.762079 | 9.858164 P | P | P | P | 8.630208 |
| 10.8966  | 10.00503 | 11.358   | 11.56367 P | P | P | P | 10.181   |
|          | 5.509886 | 4.081227 |            | P | P |   |          |
| 9.913678 | 8.951811 | 8.209807 | 7.497229 P | P | P | P | 9.552167 |
|          | 5.472562 | 6.479168 | 6.739204   | P | A | P |          |
|          |          | 6.948289 |            |   | A |   |          |
| 9.262704 | 8.943321 | 10.35851 | 10.24815 P | P | P | P | 8.223672 |
|          | 5.562321 |          |            | A |   |   |          |
| 9.239494 | 9.082669 | 8.681104 | 8.647118 P | P | P | P | 8.212182 |
| 8.388221 | 8.771696 | 8.030266 | 8.581675 P | P | P | P | 8.455646 |
| 5.784    | 5.374003 |          | A          | P | P |   | 4.071086 |
| 10.55874 | 11.1524  | 10.0435  | 9.651338 P | P | P | P | 10.72194 |
|          | 5.844823 |          |            | A |   |   |          |
| 7.584432 | 6.52962  | 6.757976 | A          | P | M |   | 5.682697 |
| 6.511065 | 7.467548 | 10.67365 | 10.54571 P | P | P | P | 7.239801 |
| 11.32146 | 10.88769 | 9.203905 | 9.446216 P | P | P | P | 10.60918 |
| 9.732939 | 9.614602 | 8.299023 | 7.674142 P | P | P | P | 9.41622  |
| 6.743587 | 6.466086 | 8.159491 | 7.432528 P | P | P | P | 6.609706 |
| 11.58824 | 10.87811 | 11.19058 | 12.92303 P | P | P | P | 12.0049  |
| 7.263598 | 7.703234 | 7.232383 | 7.083035 P | P | P | P | 6.562843 |
|          |          | 6.422656 | 6.03964    |   | P | A |          |
| 8.018401 | 6.969176 | 8.187592 | 8.353942 P | P | A | P | 7.464505 |
| 5.464189 |          |          | 4.466991 A |   |   | P | 5.773136 |
| 7.316252 | 7.321621 | 7.047027 | 6.336002 P | P | P | M | 7.979154 |
|          | 8.43286  | 8.274976 |            | P | P |   |          |
| 8.95739  | 9.065891 | 8.240625 | 8.722541 P | P | P | P | 8.937563 |
| 10.66994 | 10.01016 | 10.87553 | 11.31479 P | P | P | P | 10.00102 |
| 10.57062 | 10.06082 | 10.80258 | 9.968142 P | P | P | P | 10.01609 |
| 7.997874 | 6.783335 | 7.756222 | 6.955285 M | A | P | A | 6.797118 |
| 11.24004 | 11.61622 | 10.58756 | 10.62935 P | P | P | P | 11.66924 |
| 14.80881 | 14.63024 | 14.09801 | 16.0004 A  | P | P | P | 5.368753 |

|          |          |          |            |   |   |   |          |
|----------|----------|----------|------------|---|---|---|----------|
|          | 5.737497 | 1.915727 |            | P | P |   |          |
| 3.478097 | 5.844247 | 6.927007 | P          | P | P |   | 7.465076 |
| 8.57741  | 9.378011 | 8.74019  | 8.415854 P | P | P | P | 9.297479 |
| 10.96527 | 11.41773 | 10.91111 | 9.911755 P | P | P | P | 11.09037 |
| 9.195103 | 8.231841 | 7.302163 | 6.937017 P | P | P | P | 8.104343 |
| 10.41742 | 11.18723 | 8.965693 | 8.787648 P | P | P | P | 10.65815 |
| 11.29976 | 11.91174 | 10.01243 | 10.52514 P | P | P | P | 11.51448 |
| 11.28079 | 11.6486  | 11.1751  | 10.31997 P | P | P | P | 11.1806  |
| 8.870397 | 8.595741 | 7.975918 | 7.471567 P | P | P | P | 8.638718 |
| 9.157525 | 8.584234 | 7.981869 | 7.404799 P | P | P | P | 9.151073 |
| 6.091923 | 6.391274 | 4.9135   | 3.494479 A | P | M | P | 2.869034 |
| 5.66749  | 5.692871 | 6.339946 | 5.951083 M | A | P | P | 6.826943 |
|          | 6.340632 | 2.531655 |            | M | P |   |          |
| 8.438429 | 8.569547 | 8.105504 | 7.303448 P | P | P | P | 7.81858  |
| 8.338665 | 7.744633 | 8.776801 | 9.866105 P | P | P | P | 8.578941 |
| 9.436296 | 7.849995 | 8.935732 | 9.34224 P  | P | P | P | 8.394956 |
| 7.041785 | 6.706305 | 6.870318 | 7.120781 A | P | P | P | 5.292384 |
| 8.374156 | 9.228611 | 9.764442 | 10.27495 P | P | P | P | 9.207953 |
| 12.16898 | 11.61399 | 12.73182 | 12.58263 P | P | P | P | 11.50246 |
| 7.575562 | 7.390683 | 8.409602 | 8.55481 P  | P | P | P | 7.356916 |
| 6.615114 |          | 7.261289 | 7.993174 P |   | A | A | 7.365577 |
| 4.559941 |          |          | 5.744372 M |   |   | A | 5.793179 |
| 7.910619 | 7.895605 | 7.916915 | 8.834806 P | P | P | P | 7.965048 |
| 8.766176 | 7.208274 | 8.208673 | 7.63016 P  | P | P | P | 7.316403 |
|          | 5.276376 |          |            | P |   |   |          |
| 7.846536 | 7.976075 | 7.668887 | 7.590744 P | P | P | P | 6.972013 |
| 6.292642 | 5.403123 | 3.712174 | 7.400821 A | P | P | P | 2.16521  |
| 6.867423 | 7.895595 | 7.936032 | P          | P | P |   | 7.9142   |
| 7.347267 | 6.744216 | 5.201544 | 7.315788 A | P | P | P | 4.749677 |
| 6.08595  | 6.332103 | 5.773062 | 5.821313 P | P | P | P | 5.701539 |
| 6.628557 | 6.578162 | 6.25826  | 4.636393 P | P | P | P | 7.409225 |
| 5.1694   | 6.79323  | 6.698137 | 6.550371 P | P | P | A | 6.134079 |
| 10.15622 | 8.166624 | 8.030148 | 8.021287 P | P | P | P | 8.866085 |
| 8.45196  | 8.483645 | 9.738139 | 9.185274 P | P | P | P | 9.278667 |
| 10.80963 | 11.51604 | 8.438332 | 9.214501 P | P | P | P | 11.39845 |
| 4.997418 | 6.473536 |          | 5.997236 P | P |   | P | 5.029396 |
| 6.449426 | 7.021996 | 6.228938 | 7.223658 P | P | P | P | 7.542925 |
| 9.4253   | 8.581184 | 9.703654 | 10.03645 A | P | P | P | 8.10301  |
| 7.657149 | 7.507174 | 5.981121 | 5.152876 P | P | P | P | 7.31307  |
| 11.64839 | 11.19076 | 11.9608  | 12.04327 P | P | P | P | 10.90194 |

|          |          |          |          |   |   |   |          |
|----------|----------|----------|----------|---|---|---|----------|
| 12.87959 | 12.77897 | 10.74446 | 10.79066 | P | P | P | 12.22681 |
| 11.45159 | 10.62449 | 10.19876 | 9.844153 | P | P | P | 11.07154 |
|          | 5.691997 | 5.472562 |          | P | P |   |          |
| 8.808259 | 8.150572 | 8.38591  | 10.0271  | P | P | P | 9.400117 |
| 5.041103 | 6.041452 | 7.47138  | 6.761457 | A | P | A | 8.969306 |
| 8.156209 | 7.030363 | 7.732309 | 7.937345 | P | P | P | 6.447582 |
| 10.34859 | 8.895612 | 9.168335 | 10.08933 | P | P | P | 9.211967 |
| 8.894851 | 8.016502 | 9.176131 | 10.27808 | P | P | P | 8.680937 |
| 7.982041 | 8.440132 | 8.759439 | 7.63676  | P | P | P | 8.115953 |
| 6.365207 |          | 5.987338 | A        |   | P |   | 6.639119 |
| 11.21385 | 11.32091 | 10.35378 | 8.940573 | P | P | P | 11.28958 |
| 5.889793 | 6.043746 | 5.644155 | 7.028079 | P | P | P | 5.89127  |
| 6.375984 | 6.054149 | 3.403383 | 3.724553 | P | P | M | 6.358481 |
| 8.777161 | 9.429144 | 8.343625 | 8.344639 | P | P | P | 8.888956 |
| 10.92881 | 10.51423 | 9.382479 | 9.481744 | P | P | P | 10.54405 |
| 5.747867 | 6.521862 | 5.997283 | 7.582979 | A | P | P | 6.763795 |
| 6.980856 | 6.795395 | 5.661001 | P        | P | P |   | 5.958397 |
| 11.85045 | 10.69674 | 12.97206 | 13.30733 | P | P | P | 10.48718 |
| 9.520645 | 7.928073 | 9.603166 | 10.05665 | P | P | P | 8.182545 |
| 8.942669 | 8.622357 | 8.238987 | 8.441922 | P | P | P | 8.875172 |
| 13.12812 | 13.46956 | 13.64228 | 14.29946 | P | P | P | 13.70914 |
| 10.35541 | 10.00338 | 10.54009 | 10.79364 | P | P | P | 9.646132 |
| 7.505959 | 5.668916 | 7.840911 | 8.239444 | A | A | P | 6.741409 |
|          | 5.715786 | 6.06614  | 7.16014  | P | P | A |          |
| 11.30651 | 11.28008 | 11.69876 | 11.86349 | P | P | P | 11.40152 |
| 14.03554 | 13.37046 | 14.54146 | 14.85783 | P | P | P | 13.18234 |
| 9.948403 | 9.333768 | 9.861952 | 9.670404 | P | P | P | 9.005573 |
| 7.572599 | 7.449048 | 7.72739  | 8.328947 | P | P | A | 5.779461 |
| 10.78924 | 10.55141 | 11.70473 | 11.84653 | P | P | P | 10.34811 |
| 5.612403 | 6.905993 | 7.388051 | 3.823096 | P | A | P | 6.742207 |
| 6.641041 | 6.532627 | 7.675139 | 8.188667 | P | A | P | 7.535478 |
| 11.23071 | 11.12859 | 10.01163 | 10.27908 | P | P | P | 11.16775 |
| 10.05961 | 8.802177 | 9.22133  | 9.08907  | P | P | P | 8.06416  |
| 7.950371 | 7.753968 | 7.152412 | 7.00756  | P | P | P | 7.476792 |
| 12.15769 | 12.02991 | 12.71932 | 13.97857 | P | P | P | 12.59377 |
|          |          |          |          |   | M |   |          |
| 6.515399 | 6.825484 | 7.123603 | 3.763622 | P | P | P | 6.857688 |
| 8.651643 | 7.27648  | 9.325727 | 9.942719 | P | A | A | 7.853201 |
| 10.37242 | 8.599529 | 10.50472 | 10.42487 | P | P | P | 9.096367 |
| 6.369334 | 4.722455 | 6.589868 | 6.983965 | M | A | A | 6.733737 |

|          |          |          |          |   |   |   |          |
|----------|----------|----------|----------|---|---|---|----------|
| 9.565052 | 11.04102 | 9.766914 | 9.255626 | P | P | P | 10.61262 |
| 8.489829 | 8.253349 | 7.044187 | 7.986527 | P | P | P | 7.950365 |
| 7.033541 | 6.219351 | 6.870938 | 6.614773 | P | P | M | 8.177076 |
| 6.807983 | 7.019966 | 6.617044 | A        | P | A |   | 6.783181 |
| 6.7289   | 7.572949 |          | 8.116932 | A |   | P | 6.980423 |
| 6.91854  | 6.810979 | 5.595762 | 6.355775 | P | P | P | 7.086224 |
| 9.222156 | 9.597079 | 10.42928 | 11.01899 | P | P | P | 8.954664 |
| 5.520949 | 5.443129 | 6.016172 | 5.431351 | P | A | P | 5.746547 |
| 11.75714 | 11.92769 | 12.0333  | 13.62669 | P | P | P | 12.07526 |
| 6.50722  | 6.806045 | 6.876387 | A        | A | A |   | 6.40995  |
| 6.689    | 6.806891 | 4.381838 | 5.641751 | P | P | P | 5.956492 |
| 9.775052 | 10.44679 | 9.67533  | 9.416564 | P | P | P | 10.92674 |
| 7.032514 | 6.538938 | 6.697245 | 5.986271 | P | P | P | 7.714946 |
| 12.93891 | 13.08808 | 12.06642 | 11.98614 | P | P | P | 13.28685 |
| 12.91157 | 12.68185 | 13.82027 | 13.75972 | P | P | P | 12.69053 |
| 5.561824 | 5.172068 | 4.895052 | 6.992157 | A | P | A | 5.876433 |
| 13.44141 | 13.4909  | 12.49688 | 12.52971 | P | P | P | 13.79807 |
| 6.133417 |          | 6.144234 | A        |   | P |   | 2.516272 |
| 9.622634 | 9.513992 | 9.47585  | 8.807474 | P | P | P | 9.15133  |
| 5.799577 | 5.734724 | 6.61858  | 6.475919 | P | A | A | 2.749243 |
|          |          | 6.55976  |          |   |   | A |          |
| 8.352159 | 8.939625 | 8.16118  | 7.730313 | P | P | P | 8.381652 |
| 7.903908 | 6.735726 | 8.041141 | 8.567637 | M | P | P | 8.412429 |
| 9.531606 | 8.979997 | 9.67616  | 8.773973 | P | P | P | 8.010838 |
| 3.450485 | 4.807012 | 5.44167  | 6.595238 | P | P | A | 6.326462 |
| 9.054075 | 9.578009 | 7.923944 | 8.58931  | P | P | P | 9.438541 |
|          | 5.33542  |          |          | A |   |   |          |
| 5.653001 |          | 5.956895 | 6.506418 |   | A | A | 5.079953 |
|          | 6.799871 |          | 7.806998 | P |   | A |          |
| 5.942614 |          | 6.599091 | P        |   | A |   | 5.656325 |
| 5.73677  |          |          | A        |   |   |   | 3.068775 |
| 2.95238  |          |          | P        |   |   |   | 6.391644 |
| 7.438674 | 6.800279 | 7.013541 | A        | P | P |   | 5.681397 |
|          | 4.82895  |          |          | A |   |   |          |
|          |          |          | 2.789339 |   |   | P |          |
| 6.122833 | 7.894199 | 5.989463 | 6.396439 | P | P | P | 7.416786 |
|          | 6.814878 | 8.185847 | 8.336579 | A | P | A |          |
|          |          | 2.856692 |          |   | P |   |          |
| 7.796102 | 8.373934 | 6.911717 | 6.848117 | P | P | P | 8.131638 |
| 6.453935 | 7.481738 | 6.461103 | 7.216647 | P | P | P | 7.784483 |

|          |          |          |          |   |   |   |          |
|----------|----------|----------|----------|---|---|---|----------|
| 8.42338  | 7.636085 | 7.41788  | 7.342527 | P | P | P | 7.300382 |
| 7.041883 | 7.406135 | 5.592535 | 6.207404 | P | P | P | 7.535049 |
| 5.621234 | 6.523629 |          | A        | P |   |   | 6.949897 |
| 6.820732 | 6.189669 | 4.924648 | 6.99211  | P | P | P | 6.443429 |
| 6.058154 | 5.823128 | 5.58208  | 6.17087  | P | P | P | 6.01781  |
| 5.584248 |          | 5.639977 | 7.698266 |   | P | P | 6.350604 |
| 9.167813 | 9.504809 | 11.13871 | 10.99185 | P | P | P | 8.415822 |
|          | 3.601876 |          |          | P |   |   |          |
| 7.560634 | 8.268466 | 7.396635 | 7.454298 | P | P | P | 7.919372 |
| 8.69018  | 9.317411 | 7.978664 | 8.069085 | P | P | P | 8.591644 |
|          | 3.95181  |          | 5.901321 | M |   | A |          |
| 9.823926 | 10.50236 | 10.93083 | 11.24819 | P | P | P | 9.889397 |
| 6.701228 | 5.957158 | 7.421816 | 7.038737 | P | A | A | 6.93857  |
| 6.598303 | 5.93198  | 7.099052 | 6.365639 | P | P | A | 5.703951 |
| 7.593057 | 7.704163 | 7.032745 | 7.843906 | P | P | P | 6.720867 |
| 7.75619  | 6.274349 | 6.713052 | 6.291    | P | P | P | 7.293369 |
|          | 5.542117 |          |          | A |   |   |          |
| 6.0825   | 5.207432 | 5.618722 | A        | A | P |   | 5.888002 |
| 6.148212 | 6.797811 | 6.441774 | 6.981305 | P | P | P | 6.603471 |
| 3.90551  |          |          | M        |   |   |   | 5.976809 |
|          |          | 2.38874  |          |   | M |   |          |
|          | 5.486367 |          | 7.53803  | P |   | A |          |
| 6.08569  | 5.736644 | 5.336695 | P        | A | M |   | 6.716024 |
| 11.48664 | 13.43646 | 9.53097  | 10.41987 | P | P | P | 12.41664 |
| 6.037945 | 6.476314 | 6.45015  | 5.613486 | P | P | P | 5.678348 |
|          | 7.523495 | 8.120807 |          | A | A |   |          |
| 9.519735 | 9.779957 | 8.827136 | 8.212444 | P | P | P | 9.392927 |
| 6.274944 |          |          | P        |   |   |   | 7.430691 |
| 5.617439 | 6.455315 |          | 7.664394 | P |   | P | 6.977771 |
| 5.777686 | 5.363782 | 7.411978 | 7.205639 | P | P | A | 5.473252 |
|          | 5.321829 |          |          | A |   |   |          |
| 6.953823 | 7.390164 | 7.184427 | 6.093715 | P | P | M | 7.063934 |
|          | 5.414225 |          |          | A |   |   |          |
| 4.848383 | 4.348254 |          | 6.565119 | M |   | P | 6.1787   |
| 5.927869 |          |          | A        |   |   |   | 1.77174  |
| 5.331126 |          | 5.456323 | P        |   | P |   | 6.837174 |
|          |          |          | 6.448528 |   |   | A |          |
|          |          | 5.844845 |          |   | A |   |          |
|          | 5.637123 |          |          | P |   |   |          |
| 10.01618 | 9.602679 | 10.01051 | 9.374858 | P | P | P | 8.85424  |

|          |          |          |          |   |   |   |   |          |
|----------|----------|----------|----------|---|---|---|---|----------|
|          |          | 2.710016 |          |   |   | M |   |          |
| 9.883684 | 9.814446 | 9.909908 | 10.9308  | P | P | P | P | 11.25199 |
| 6.072501 | 6.506462 | 4.963273 | 5.606107 | A | A | P | P | 6.372191 |
| 5.301846 |          |          |          | P |   |   |   | 6.304203 |
| 5.899463 | 6.140146 | 7.059608 |          | P | P | A |   | 5.865118 |
| 3.803833 |          |          |          | P |   |   |   | 5.681497 |
|          |          |          | 7.518242 |   |   |   | A |          |
| 7.47384  | 7.443402 | 7.189329 | 6.727325 | P | P | P | P | 6.395004 |
|          | 5.976447 |          |          | A |   |   |   |          |
|          |          |          | 7.298104 |   |   |   | A |          |
| 5.606041 | 6.438192 | 5.49122  |          | A | P | P |   | 6.121296 |
|          | 0.277698 |          |          |   | M |   |   |          |
|          |          |          | 4.047661 |   |   |   | M |          |
| 7.197078 | 7.330855 |          | 8.027629 | A | A |   | P | 3.476968 |
|          | 2.982831 |          |          |   | P |   |   |          |
| 2.451736 |          |          |          | P |   |   |   | 5.284373 |
| 3.592064 |          |          |          | P |   |   |   | 6.248664 |
| 3.10289  | 5.55401  | 5.28982  |          | M | A | P |   | 5.615121 |
| 5.463505 |          |          |          | A |   |   |   | 1.588722 |
| 5.050903 | 1.307274 |          |          | P | P |   |   | 6.316646 |
| 5.666841 |          |          |          | P |   |   |   | 6.820583 |
|          |          | 7.634496 |          |   |   | A |   |          |
| 6.0287   |          |          |          | A |   |   |   | 4.724626 |
| 7.699456 | 7.727999 | 6.845518 | 6.368321 | P | P | P | P | 7.579503 |
| 7.6082   | 6.86733  | 5.701023 | 6.593104 | P | P | P | A | 6.461503 |
|          | 5.524118 | 5.421917 |          |   | A | P |   |          |
| 5.922678 |          | 7.952163 | 7.984956 | P |   | A | A | 5.552741 |
| 9.271351 | 9.96009  | 9.250238 | 7.887173 | P | P | P | P | 9.652163 |
| 8.59035  | 9.574486 | 8.259649 | 7.264211 | P | P | P | P | 8.808699 |
| 6.285832 | 7.251704 | 5.728571 | 5.84439  | P | P | P | P | 7.214215 |
| 9.99915  | 9.759436 | 9.40229  | 9.014459 | P | P | P | P | 9.818242 |
| 7.75786  | 6.346214 | 8.09042  | 7.549046 | P | P | A | A | 5.383942 |
|          | 5.432538 |          |          |   | A |   |   |          |
| 6.356558 | 4.896531 | 1.949297 | 5.253904 | P | P | P | P | 6.241708 |
| 7.877792 | 8.466077 | 7.146458 | 6.832245 | P | P | P | P | 7.395101 |
|          |          |          | 5.93632  |   |   |   | A |          |
| 8.740407 | 9.649862 | 9.363449 | 8.283896 | P | P | P | P | 9.493314 |
| 6.114142 | 6.227761 | 6.276664 |          | A | P | P |   | 5.241332 |
| 5.217452 |          | 6.121485 | 5.88795  | A |   | A | A | 6.145451 |
| 7.461422 | 6.976761 | 7.791441 | 8.124832 | A | P | P | A | 6.669964 |

|          |          |          |            |   |   |   |          |
|----------|----------|----------|------------|---|---|---|----------|
|          | 5.068586 |          |            | A |   |   |          |
| 6.569994 |          | 5.682314 | 6.261665 P |   | P | A | 6.707212 |
|          | 4.474548 |          |            | P |   |   |          |
|          |          |          | 6.636884   |   |   | A |          |
|          |          | 5.533624 |            |   | A |   |          |
| 4.847635 | 5.168721 | 0.914051 | A          | P | P |   | 4.596622 |
| 7.092864 | 6.453478 | 6.141746 | P          | A | P |   | 6.546228 |
|          |          | 3.832933 |            |   | P |   |          |
| 7.00282  | 5.946561 | 7.027636 | 7.93143 P  | P | P | P | 7.428285 |
|          | 6.11249  |          | 7.087738   | A |   | A |          |
| 6.343105 | 7.191813 | 7.264096 | 7.439809 P | P | P | M | 6.953563 |
| 9.86711  | 10.02689 | 9.829772 | 9.514115 P | P | P | P | 10.39396 |
|          | 4.240457 |          |            | P |   |   |          |
|          |          | 5.807206 | 5.706348   |   | A | P |          |
| 6.658805 |          | 7.74706  | 7.944585 P |   | A | A | 7.633071 |
| 5.963561 | 5.767356 | 4.072783 | 6.79341 P  | A | P | A | 5.876393 |
|          | 6.0347   |          |            | A |   |   |          |
| 4.772602 |          |          | 5.41745 P  |   |   | P | 5.998603 |
| 6.589346 |          |          | A          |   |   |   | 4.962532 |
| 5.863979 | 5.9966   | 5.500911 | 4.110406 P | P | P | P | 6.36354  |
| 7.12543  | 7.573363 | 7.70625  | 6.374657 P | P | P | P | 7.273561 |
| 6.006633 | 5.670636 | 6.647806 | 7.184555 A | P | A | A | 5.470221 |
| 8.349631 | 7.091901 | 7.774972 | 6.438191 P | P | P | P | 7.299602 |
|          | 4.871409 |          |            | A |   |   |          |
| 5.368409 |          | 5.911841 | P          |   | P |   | 6.568249 |
|          | 5.889396 |          | 6.400041   | P |   | A |          |
| 1.767972 |          |          | M          |   |   |   | 6.110535 |
| 4.282116 |          | 0.255565 | P          |   | P |   | 5.295183 |
| 5.551408 | 7.289757 | 7.403344 | A          | A | P |   | 3.708749 |
| 7.167029 | 6.469923 | 6.109445 | 6.351961 P | P | P | P | 7.181202 |
| 5.809619 |          | 3.33425  | A          |   | P |   | 5.188067 |
| 5.364599 | 5.849003 | 1.899582 | M          | A | P |   | 5.461488 |
| 6.115771 | 6.302657 | 6.959372 | 6.846352 P | A | P | A | 6.484073 |
| 6.07751  | 6.377326 |          | P          | A |   |   | 6.538011 |
| 6.823937 | 6.71872  | 8.076106 | 7.90235 P  | P | P | P | 6.464832 |
| 8.470728 | 8.643723 | 7.658819 | 7.861316 P | P | P | P | 8.736707 |
| 7.117065 | 8.68387  | 8.183656 | 7.67291 P  | P | P | P | 8.313885 |
| 6.877691 | 5.711754 | 7.175394 | P          | P | P |   | 6.796776 |
|          | 7.05854  | 6.868045 | 6.532221   | A | A | A |          |
| 6.928972 | 7.571111 | 7.221439 | 5.581468 P | P | P | P | 7.722078 |

|          |          |          |          |   |   |   |          |
|----------|----------|----------|----------|---|---|---|----------|
| 9.236668 | 9.459971 | 8.768771 | 7.721981 | P | P | P | 9.157564 |
| 8.619369 | 8.128691 | 9.46916  | 9.304033 | P | P | P | 7.088913 |
| 6.124215 |          | 6.662584 | A        |   | P |   | 3.244624 |
| 6.811467 | 6.818976 | 7.48845  | 6.537704 | A | P | M | 5.731406 |
|          |          | 6.212197 |          |   | A |   |          |
| 9.657957 | 9.80358  | 9.284648 | 8.881733 | P | P | P | 9.455957 |
| 9.005116 | 8.523951 | 8.77089  | 8.257963 | P | P | P | 8.278061 |
| 5.266659 | 5.576972 | 5.710982 | 6.743676 | P | P | P | 6.205179 |
| 5.927141 | 5.865311 | 6.747259 | 5.814962 | A | P | A | 5.338792 |
| 8.766313 | 6.792925 | 6.882785 | 6.905976 | P | P | P | 7.140331 |
| 5.871225 | 5.375982 | 6.015272 | 6.523212 | P | A | P | 5.867458 |
| 7.772601 | 8.170074 | 7.880685 | 6.511801 | P | P | P | 7.716363 |
| 8.691387 | 8.91968  | 8.026449 | 7.867286 | P | P | P | 8.262713 |
| 5.485771 |          |          | A        |   |   |   | 3.942699 |
| 9.185594 | 9.604172 | 8.785651 | 8.145926 | P | P | P | 9.101453 |
| 10.97763 | 9.468641 | 10.98875 | 11.06249 | P | P | P | 9.019485 |
| 10.0633  | 9.054337 | 10.24783 | 10.17028 | P | P | P | 8.5328   |
| 5.445818 |          | 6.307375 | 6.41271  |   | A | A | 5.438581 |
| 6.867741 | 6.865837 | 6.628339 | 7.351054 | P | P | P | 7.066626 |
| 7.259494 | 6.613548 | 6.594552 | A        | A | P |   | 6.512455 |
| 5.130852 | 5.054323 |          | 6.77441  | P |   | A | 4.755581 |
| 6.24547  | 5.607444 | 3.651952 | 6.946365 | P | P | P | 5.760771 |
| 7.126505 | 7.341458 | 7.772151 | 7.159015 | A | P | M | 4.095025 |
| 8.056361 | 7.549392 | 8.24089  | 10.21366 | P | P | P | 8.439281 |
| 5.38749  | 5.341466 |          | A        | A |   |   | 2.629614 |
| 7.427291 | 6.86199  | 6.81957  | 4.960346 | P | P | P | 6.545379 |
| 4.272004 | 6.012431 |          | P        | A |   |   | 5.400229 |
|          | 4.47432  | 5.501039 |          | P | P |   |          |
| 5.316823 |          |          | P        |   |   |   | 6.416334 |
| 3.124472 | 5.56874  |          | 4.468356 | P |   | P | 6.365064 |
| 9.668442 | 9.702191 | 9.19701  | 8.407875 | P | P | P | 9.63626  |
| 7.56878  | 7.577416 | 6.598219 | 6.911681 | P | P | P | 7.05817  |
| 7.74118  | 7.510998 | 8.235789 | 7.555845 | A | A | M | 8.043625 |
| 4.980471 |          |          | M        |   |   |   | 6.318001 |
| 7.094691 | 6.073055 | 7.562503 | 8.025066 | P | A | P | 4.400262 |
|          | 6.142765 | 4.941707 | 3.430986 | A | M | M |          |
| 6.250125 | 7.477406 | 6.026397 | 6.617354 | P | P | A | 7.399107 |
| 10.19937 | 11.58517 | 11.90187 | 10.73108 | P | P | P | 10.62208 |
| 9.003211 | 9.403227 | 8.785211 | 6.926003 | P | P | P | 8.832776 |
|          |          | 6.922813 |          |   | A |   |          |



|          |          |          |          |   |   |   |          |
|----------|----------|----------|----------|---|---|---|----------|
| 8.677321 | 8.738259 | 9.63069  | 8.966105 | P | P | P | 8.856874 |
| 9.108719 | 8.984707 | 8.165898 | 7.726669 | P | P | P | 8.848605 |
| 4.996916 | 4.572053 | 6.204934 | A        | P | M |   | 5.572821 |
| 5.7873   | 5.265152 | 6.311723 | 6.159225 | P | A | P | 6.59012  |
| 7.44689  | 7.895684 | 6.862522 | 5.77794  | P | P | P | 7.803093 |
| 7.121007 | 7.963169 | 7.004041 | P        | P | P |   | 7.580479 |
| 6.308281 | 5.669756 | 6.664188 | A        | P | P |   | 4.820457 |
| 6.132898 |          | 6.079723 | 7.00611  |   | A | P | 6.237752 |
|          |          | 4.268533 |          |   | M |   |          |
|          |          |          | 6.321568 |   |   | A |          |
| 6.450476 | 4.441219 |          | A        | P |   |   | 5.695083 |
| 6.658862 |          | 5.178791 | 6.492579 |   | P | A | 5.538441 |
| 8.478807 | 8.875202 | 6.96261  | 5.958817 | P | P | P | 8.699912 |
| 4.940126 | 3.834344 |          | 6.602966 | P |   | P | 5.958108 |
| 6.393033 | 6.255188 | 7.155984 | 6.490992 | P | P | P | 6.947778 |
|          |          | 3.793596 |          |   | P |   |          |
|          |          | 4.57704  |          |   | P |   |          |
| 6.130434 | 6.185664 | 6.899371 | A        | P | P |   | 5.433662 |
|          |          | 5.893284 |          |   | A |   |          |
| 5.94568  |          | 6.540076 | A        |   | A |   | 4.370958 |
| 9.583735 | 9.675781 | 9.830975 | 8.004982 | P | P | P | 9.527841 |
| 6.612988 | 7.100781 | 6.676306 | 6.203917 | P | P | A | 7.336155 |
| 5.031461 | 6.664263 | 7.195659 | 7.581528 | P | P | P | 7.378117 |
| 7.910714 | 8.241134 | 7.475754 | 6.891777 | P | P | P | 7.612907 |
| 8.487099 | 8.344764 | 7.622827 | 6.912686 | P | P | P | 8.355118 |
| 4.798913 |          |          | A        |   |   |   | 0.043866 |
| 6.513674 |          | 2.973039 | P        |   | P |   | 6.31436  |
| 5.166133 |          | 3.495549 | P        |   | P |   | 6.021364 |
| 6.852644 | 6.975303 | 6.025816 | 7.012185 | P | P | P | 7.434225 |
| 6.022938 |          | 6.992568 | 7.507548 |   | A | A | 6.20581  |
| 5.783192 | 7.394114 | 4.119344 | 5.879621 | P | P | P | 6.213615 |
|          | 8.790574 | 7.383881 |          | P | P |   |          |
| 6.44034  | 6.571263 | 6.335808 | 3.628732 | P | A | P | 6.959238 |
| 6.723545 | 5.610778 | 7.320598 | 7.800285 | P | M | P | 6.262461 |
|          | 4.693912 | 2.235183 | 6.548224 | A | P | A |          |
|          |          | 5.061446 |          |   | P |   |          |
| 6.329914 | 6.338974 | 6.136636 | A        | P | P |   | 6.041798 |
| 8.648601 | 8.450629 | 8.578957 | 9.357476 | P | P | P | 8.327449 |
| 1.045401 |          |          | P        |   |   |   | 5.682989 |
| 4.422665 | 5.840435 | 6.170412 | P        | P | P |   | 6.293987 |

|          |          |          |            |   |   |   |   |          |
|----------|----------|----------|------------|---|---|---|---|----------|
|          | 1.095976 |          |            |   | M |   |   |          |
|          |          |          | 6.132372   |   |   |   | A |          |
|          |          | 2.568555 |            |   |   | P |   |          |
| 5.018326 |          | 0.955691 | A          |   |   | P |   | 4.504115 |
| 8.387155 | 9.031775 | 8.496499 | 9.33046 P  | P | P | P | P | 9.515394 |
|          | 4.040888 |          |            | M |   |   |   |          |
| 5.976897 | 5.312846 | 6.647174 | 4.265004 P | A | A | P |   | 6.741578 |
| 6.540337 |          |          | A          |   |   |   |   | 5.260619 |
| 6.757906 | 7.909481 | 6.84213  | 6.897609 P | P | P | P |   | 7.727161 |
| 9.752912 | 10.52734 | 9.521234 | 9.430657 P | P | P | P |   | 10.24245 |
| 5.885077 | 5.281445 |          | 7.002455 P | P |   | P |   | 5.785948 |
| 7.053674 | 8.136727 | 8.819201 | 8.343233 P | P | A | A |   | 8.188043 |
| 5.834441 |          |          | 7.012811 P |   |   | A |   | 6.455868 |
| 6.611603 | 7.114058 | 7.89678  | 7.276709 P | P | A | P |   | 7.378264 |
|          | 6.440556 | 5.724238 | 6.16318    | P | P | M |   |          |
|          | 6.053008 | 5.103366 | 7.092267   | P | P | A |   |          |
|          |          |          | 6.159557   |   |   | A |   |          |
| 9.255285 | 6.955462 | 6.492531 | 7.259885 P | P | P | A |   | 6.937916 |
| 8.247272 | 7.281738 | 7.676576 | 7.986764 A | P | P | A |   | 7.195978 |
| 11.00616 | 9.625113 | 10.75558 | 10.41337 P | P | P | P |   | 9.248156 |
| 7.681302 | 7.790186 | 7.765522 | 7.318907 P | P | P | P |   | 8.142758 |
| 7.590646 | 6.966896 | 6.443606 | 8.112936 P | A | A | P |   | 7.154816 |
| 7.687538 | 7.176173 | 7.523442 | P          | A | A |   |   | 6.592188 |
| 3.94882  |          |          | M          |   |   |   |   | 6.610322 |
| 7.640519 | 9.134513 | 8.215955 | 8.183172 P | P | P | P |   | 8.45683  |
| 5.329855 | 3.439455 | 5.866755 | P          | M | A |   |   | 5.931274 |
| 9.510687 | 9.258154 | 8.560616 | 8.116879 P | P | P | P |   | 9.36733  |
| 5.794606 | 5.02454  | 4.476944 | A          | A | P |   |   | 1.846359 |
| 9.259518 | 9.190384 | 9.116826 | 8.122322 P | P | P | P |   | 8.91958  |
| 7.060467 | 7.425015 | 7.345046 | P          | P | P |   |   | 7.488998 |
| 5.755961 |          |          | 4.964642 P |   |   | M |   | 6.251505 |
| 8.371424 | 9.1628   | 8.435234 | 9.024584 P | P | P | P |   | 9.208228 |
|          | 6.361098 |          |            | P |   |   |   |          |
| 4.946561 |          |          | P          |   |   |   |   | 6.088548 |
| 8.604108 | 7.34586  | 8.073837 | 8.849546 A | P | P | P |   | 7.405874 |
| 7.928871 | 7.45915  | 9.106341 | 9.707802 P | P | P | P |   | 8.010419 |
| 7.068986 | 7.327699 | 7.518315 | A          | A | P |   |   | 7.202416 |
| 6.705543 | 6.739384 | 5.376032 | 6.020609 P | P | P | P |   | 6.821107 |
| 7.790786 | 7.347602 | 8.672476 | 8.432909 P | P | P | P |   | 7.254063 |
| 6.248181 |          |          | A          |   |   |   |   | 5.159105 |

|          |          |          |            |   |   |   |          |
|----------|----------|----------|------------|---|---|---|----------|
|          |          | 5.411181 |            |   | A |   |          |
| 8.374704 | 7.190298 | 7.626303 | A          | P | P |   | 6.85746  |
| 7.381086 | 8.997298 | 8.442781 | 7.055612 P | P | P | P | 9.002613 |
| 7.571247 | 7.179162 | 9.429713 | P          | M | A |   | 8.050665 |
|          |          | 6.709415 | 6.231675   |   | A | P |          |
| 4.00384  |          | 6.678846 | 6.41616 P  |   | P | P | 6.157355 |
|          |          | 2.801592 |            |   | P |   |          |
|          | 4.711706 |          |            | M |   |   |          |
| 7.09433  |          |          | 7.059248 A |   |   | P | 5.36622  |
| 6.592863 | 6.246485 | 7.585403 | 7.173224 A | P | P | A | 6.830308 |
| 4.384318 | 6.255462 |          | 6.019778 P | A |   | P | 5.918641 |
| 6.832587 | 6.743021 | 6.810113 | 6.978222 A | P | P | A | 6.255262 |
| 8.536696 | 10.15325 | 9.582454 | 9.189643 P | P | P | P | 9.579433 |
| 13.61163 | 13.18151 | 12.31477 | 12.26838 P | P | P | P | 12.21212 |
| 6.746753 | 6.294162 |          | 6.991569 P | P |   | A | 5.987972 |
|          |          |          | 6.69803    |   |   | A |          |
| 11.43943 | 12.01839 | 10.44461 | 10.05869 P | P | P | P | 11.68839 |
| 12.39583 | 11.53186 | 13.2471  | 14.17452 P | P | P | P | 11.97618 |
| 10.84961 | 10.01311 | 9.869242 | 9.912906 P | P | P | P | 10.38655 |
| 13.64975 | 14.00505 | 13.82115 | 12.80762 P | P | P | P | 13.86074 |
| 10.52474 | 10.6208  | 11.20692 | 11.5555 P  | P | P | P | 10.51369 |
| 12.2421  | 12.50342 | 11.41424 | 11.47296 P | P | P | P | 12.54685 |
| 9.023758 | 9.038077 | 7.827316 | 8.383091 P | P | P | P | 9.303314 |
| 11.50605 | 11.2949  | 10.61207 | 10.84704 P | P | P | P | 11.55437 |
| 9.358767 | 9.307823 | 7.480615 | 9.375056 P | P | P | P | 9.907673 |
| 10.77135 | 11.1398  | 10.26619 | 9.743104 P | P | P | P | 10.86992 |
| 10.88356 | 9.054213 | 10.8447  | 10.82197 P | P | P | P | 10.30715 |
| 12.48136 | 12.55832 | 12.33915 | 11.61082 P | P | P | P | 12.79117 |
| 5.734044 | 6.93899  | 6.446779 | 5.198932 A | P | P | P | 5.602198 |
| 6.666455 | 5.966635 | 7.360602 | 7.876416 P | P | P | P | 7.062465 |
| 6.855993 |          | 9.646709 | 9.494841 A |   | A | A | 3.854789 |
| 6.038689 |          |          | A          |   |   |   | 4.280073 |
| 11.68782 | 11.98488 | 11.24536 | 10.78101 P | P | P | P | 11.97745 |
|          |          | 2.152464 |            |   | P |   |          |
| 4.913958 | 4.654326 | 6.022294 | P          | A | M |   | 6.099151 |
| 8.212186 | 8.161446 | 7.50436  | 7.165272 P | P | P | P | 8.262017 |
| 12.51363 | 12.74181 | 11.99888 | 11.37072 P | P | P | P | 12.45803 |
| 13.1127  | 13.02475 | 12.23352 | 11.91937 P | P | P | P | 12.85233 |
| 10.20206 | 10.61798 | 9.880561 | 9.068581 P | P | P | P | 9.992335 |
| 9.992232 | 10.65498 | 9.940519 | 10.25854 P | P | P | P | 10.38471 |

|          |          |          |            |   |   |   |          |
|----------|----------|----------|------------|---|---|---|----------|
|          | 6.677914 | 6.283005 |            | A | P |   |          |
| 11.13541 | 11.53084 | 11.07408 | 10.29953 P | P | P | P | 10.77145 |
| 11.25928 | 10.74532 | 10.97828 | 9.162706 P | P | P | P | 10.38355 |
| 9.471456 | 9.938459 | 9.280351 | 8.664071 P | P | P | P | 9.559769 |
| 6.433949 | 6.122679 | 6.102981 | 6.695683 A | M | P | A | 6.247539 |
| 11.20093 | 11.27311 | 10.89075 | 10.19501 P | P | P | P | 11.07666 |
| 10.46802 | 10.7462  | 10.57398 | 9.401456 P | P | P | P | 11.028   |
| 9.171465 | 9.667191 | 10.37226 | 9.545996 P | P | P | P | 9.063668 |
| 11.14634 | 11.68836 | 10.57196 | 10.15251 P | P | P | P | 11.67597 |
|          | 4.257494 |          |            | M |   |   |          |
|          | 5.992802 | 6.116934 |            | P | P |   |          |
| 11.09081 | 9.699591 | 10.57187 | 10.39409 P | P | P | P | 9.571896 |
| 9.714306 | 10.65589 | 8.763218 | 7.998274 P | P | P | P | 10.17561 |
| 9.187798 | 10.22928 | 8.551375 | 8.226731 P | P | P | P | 10.2161  |
| 7.374239 |          | 12.56035 | 12.49831 P |   | P | P | 13.27214 |
| 9.301295 | 10.77027 | 9.988186 | 8.350319 P | P | P | P | 9.687511 |
| 11.54276 | 11.10315 | 12.29206 | 11.9697 P  | P | P | P | 10.8947  |
| 10.37101 | 9.15962  | 8.770763 | 9.014783 A | P | P | P | 7.173243 |
| 12.20817 | 11.86571 | 11.45927 | 11.61629 P | P | P | P | 11.81776 |
| 8.650002 | 10.82342 | 10.11699 | 9.141415 P | P | P | P | 10.71765 |
| 8.513536 | 8.638979 | 8.208791 | 8.440367 P | P | P | P | 8.473413 |
| 9.358185 | 8.545048 | 9.233944 | 10.55704 P | P | P | P | 8.830221 |
| 13.1531  | 13.96917 | 13.23686 | 12.41216 P | P | P | P | 13.40829 |
| 5.648119 | 4.84544  | 4.894023 | 5.754219 P | P | P | P | 5.949885 |
| 7.875158 | 7.753988 | 6.271458 | 7.593283 P | P | P | P | 7.251689 |
| 11.61106 | 11.59138 | 12.14043 | 13.15153 P | P | P | P | 11.6622  |
|          | 2.144918 | 6.462799 |            | P | A |   |          |
| 11.02104 | 11.00403 | 10.40468 | 9.657304 P | P | P | P | 11.36923 |
| 9.798377 | 9.960249 | 10.74256 | 9.31297 P  | P | P | P | 8.952922 |
| 7.18844  | 7.116216 | 7.165368 | 6.579814 P | P | P | P | 6.555735 |
| 9.470343 | 8.983021 | 8.269824 | 8.506792 P | P | P | P | 8.633441 |
| 9.305484 | 8.78697  | 9.887034 | 10.80412 P | P | P | P | 9.248886 |
| 7.562006 | 7.093699 | 8.800804 | 8.491853 A | A | A | P | 6.914798 |
| 12.89232 | 12.83782 | 12.02188 | 11.91261 P | P | P | P | 13.05965 |
| 9.910826 | 9.39705  | 10.63444 | 10.43919 P | P | P | P | 9.388587 |
| 13.14448 | 14.00896 | 13.1563  | 12.39023 P | P | P | P | 13.67759 |
| 11.04296 | 10.54958 | 10.10961 | 9.988257 P | P | P | P | 10.61869 |
| 9.932508 | 8.80815  | 9.724292 | 9.260351 P | P | P | P | 8.640615 |
| 6.408853 | 5.918251 | 5.582299 | M          | P | P |   | 5.682576 |
| 9.442071 | 8.882113 | 8.574278 | 7.68023 P  | P | P | P | 9.480423 |

|          |          |          |          |   |   |   |          |
|----------|----------|----------|----------|---|---|---|----------|
| 9.637961 | 9.381845 | 10.8051  | 9.790669 | P | P | P | 9.454159 |
| 8.403659 | 8.399927 | 8.09434  | 7.824879 | P | P | P | 8.609942 |
| 10.98771 | 10.30428 | 11.16288 | 10.61502 | P | P | P | 10.44769 |
| 11.6353  | 11.5334  | 11.30777 | 10.37935 | P | P | P | 11.03838 |
| 9.029667 | 9.234592 | 7.503635 | 7.350984 | P | P | P | 8.928    |
| 6.89004  | 7.001504 | 8.077494 | 6.895981 | P | P | P | 7.202556 |
| 6.533218 | 7.225527 | 6.210139 | A        | P | P |   | 6.799783 |
| 6.282182 | 5.090001 | 6.689818 | 7.457382 | P | P | A | 6.621468 |
| 12.4908  | 12.6028  | 12.02931 | 11.91025 | P | P | P | 12.74129 |
| 4.933178 | 5.424439 | 6.255933 | M        | M | A |   | 5.509913 |
| 10.86473 | 11.22289 | 11.39788 | 10.29172 | P | P | P | 10.0892  |
| 5.579664 | 7.767217 | 5.854247 | 6.713138 | P | P | P | 7.181103 |
| 11.66444 | 11.34797 | 10.97827 | 10.4519  | P | P | P | 10.59616 |
| 10.2387  | 10.87316 | 9.643088 | 9.552216 | P | P | P | 10.49418 |
| 9.967715 | 10.99188 | 10.57136 | 11.61316 | P | P | P | 9.75658  |
| 8.976531 | 8.661217 | 8.208469 | 8.067957 | P | P | P | 8.91906  |
| 10.32477 | 10.2815  | 10.33754 | 9.331443 | P | P | P | 10.82577 |
| 11.87444 | 11.01605 | 10.44114 | 10.62631 | P | P | P | 11.89545 |
| 10.00204 | 10.62747 | 9.503308 | 9.161253 | P | P | P | 10.02994 |
| 9.455168 | 10.43316 | 9.01635  | 8.673597 | P | P | P | 9.547321 |
| 9.546639 | 10.34933 | 10.75375 | 10.69893 | P | P | P | 10.60957 |
| 11.75971 | 12.49062 | 12.61832 | 11.65759 | P | P | P | 12.64802 |
| 14.36292 | 14.24993 | 15.02751 | 15.12566 | P | P | P | 14.26688 |
| 8.920988 | 8.141615 | 9.981137 | 9.383132 | P | P | P | 7.705448 |
| 10.78069 | 9.517067 | 9.438391 | 9.060946 | P | P | P | 10.06458 |
| 9.98969  | 10.28804 | 10.13992 | 9.498538 | P | P | P | 10.19137 |
| 12.66199 | 11.71197 | 12.49538 | 11.54596 | P | P | P | 11.10421 |
| 8.688528 | 8.095872 | 8.870205 | 8.916323 | P | A | A | 9.001737 |
| 5.289412 | 6.675421 | 7.273076 | 4.521902 | P | P | P | 6.629587 |
| 11.48165 | 12.20628 | 12.40015 | 12.35524 | P | P | P | 12.71156 |
| 10.90009 | 10.43865 | 10.37854 | 10.87348 | P | P | P | 10.74085 |
| 7.666812 | 7.308278 | 7.059628 | 6.755281 | P | P | P | 6.578309 |
| 8.88579  | 10.20632 | 9.355954 | 9.600186 | P | P | P | 10.48742 |
| 12.7579  | 12.28968 | 13.4272  | 14.42709 | P | P | P | 12.8682  |
| 10.60581 | 10.39091 | 11.16986 | 11.90007 | P | P | P | 10.49114 |
| 8.190533 | 7.457717 | 7.458592 | 6.270519 | P | P | P | 7.480969 |
| 5.943268 |          | 6.87706  | 6.84517  |   | A | A | 6.368    |
| 11.40055 | 12.42046 | 11.4794  | 11.41117 | P | P | P | 11.14112 |
| 8.657126 | 8.517846 | 6.846564 | 7.409145 | P | P | P | 8.837873 |
| 11.70321 | 11.90779 | 11.07914 | 11.54167 | P | P | P | 12.27833 |

|          |          |          |          |   |   |   |   |          |
|----------|----------|----------|----------|---|---|---|---|----------|
| 6.374178 |          |          |          | A |   |   |   | 1.231701 |
| 6.133502 | 4.932506 | 5.545852 |          | A | P | A |   | 4.345373 |
| 11.63079 | 11.63712 | 10.94261 | 10.57659 | P | P | P | P | 11.4404  |
| 11.61843 | 11.33075 | 10.86494 | 10.79691 | P | P | P | P | 11.23651 |
| 11.54764 | 11.3607  | 10.89304 | 10.72216 | P | P | P | P | 11.5282  |
| 7.865439 | 8.593415 | 8.115582 | 7.337611 | P | P | P | P | 7.720195 |
| 11.68599 | 11.15328 | 12.31634 | 12.99795 | P | P | P | P | 11.58981 |
|          | 5.125228 |          | 5.036079 | P |   |   | P |          |
| 8.390883 | 7.963821 | 8.753179 | 9.98516  | P | P | P | P | 7.913471 |
| 9.653842 | 9.03931  | 9.204916 | 8.569984 | P | P | P | P | 9.528156 |
| 7.61003  | 6.014021 | 6.078186 | 6.665821 | P | P | M |   | 7.467773 |
| 13.79635 | 14.33603 | 12.64976 | 13.0202  | P | P | P | P | 14.46292 |
| 7.645719 | 7.866526 | 8.948546 | 8.955318 | P | P | P | P | 6.886866 |
| 6.052473 |          |          | 2.922851 | A |   |   | P | 6.442341 |
|          | 6.947011 |          |          | A |   |   |   |          |
| 11.10882 | 10.5864  | 10.17395 | 11.5083  | P | P | P | P | 10.72822 |
|          | 6.792264 | 8.400572 | 8.712445 | A | A | P |   |          |
| 9.166302 | 10.30287 | 9.055968 | 8.16376  | P | P | P | P | 9.780715 |
| 7.717434 | 7.027301 | 6.866013 | 7.765945 | P | P | P | P | 7.444594 |
| 6.950625 | 10.13038 | 10.37863 | 9.979665 | P | P | P | P | 11.19455 |
|          |          |          |          |   | P |   |   |          |
| 10.45876 | 10.46886 | 10.73653 | 11.76493 | P | P | P | P | 10.59819 |
| 10.87872 | 10.10749 | 10.64214 | 11.27031 | P | P | P | P | 10.46794 |
| 7.1303   | 7.37569  | 7.109832 |          | P | A | P |   | 7.992189 |
| 13.23176 | 13.94889 | 13.30294 | 12.5602  | P | P | P | P | 13.8654  |
|          | 6.337081 | 5.612541 |          | P | P |   |   |          |
| 5.65529  |          |          |          | A |   |   |   | 4.61294  |
|          |          | 8.79913  | 8.176127 |   |   | P | P |          |
| 10.06507 | 9.427601 | 9.249695 | 8.492374 | P | P | P | P | 9.658439 |
| 11.2004  | 11.39224 | 11.98154 | 12.09361 | P | P | P | P | 10.86663 |
| 11.34496 | 12.02134 | 11.31949 | 10.29157 | P | P | P | P | 11.63249 |
| 12.30862 | 11.92086 | 11.18145 | 10.56459 | P | P | P | P | 11.4787  |
| 8.060996 | 8.673443 | 7.40562  | 8.795201 | P | P | P | P | 8.417603 |
| 11.12308 | 11.94784 | 12.14829 | 11.55537 | P | P | P | P | 12.49577 |
| 5.684716 |          | 4.824624 | 6.695424 | A |   | P | A | 4.965363 |
| 6.639616 | 6.134548 | 1.686594 | 1.844944 | A | P | P | P | 5.414851 |
| 6.110575 | 6.671014 | 4.568418 | 7.33459  | P | P | P | P | 6.578512 |
| 4.66251  | 2.412211 |          |          | P |   |   |   | 6.195295 |
| 9.599002 | 9.460514 | 9.504522 | 8.76858  | P | P | P | P | 9.849246 |
| 9.060528 | 8.995626 | 9.250546 | 8.558476 | P | P | P | P | 7.425689 |

|          |          |          |          |   |   |   |          |
|----------|----------|----------|----------|---|---|---|----------|
| 7.329054 | 9.038139 | 9.260294 | 8.065226 | P | P | P | 8.93081  |
| 9.533126 | 8.65754  | 9.839279 | 9.872792 | P | P | P | 8.423013 |
|          |          |          | 5.724189 |   | P | P |          |
| 7.380228 | 8.457261 | 7.650538 | 8.214587 | P | P | P | 8.330262 |
| 12.81053 | 12.49492 | 12.29907 | 11.78264 | P | P | P | 12.45763 |
| 11.03779 | 12.07591 | 12.98472 | 14.25013 | P | P | P | 12.38406 |
| 10.68617 | 9.726888 | 9.516334 | 9.946681 | P | P | P | 11.05615 |
| 3.295247 | 5.004628 |          | P        | A |   |   | 5.816856 |
| 6.876073 | 6.880509 | 6.898048 | 6.063384 | P | P | P | 7.115421 |
| 7.444674 | 8.110914 | 8.81277  | 9.110763 | P | P | P | 8.058422 |
| 13.11407 | 13.80972 | 12.80325 | 11.94119 | P | P | P | 13.27359 |
| 12.02427 | 11.29927 | 12.06351 | 13.04579 | P | P | P | 11.97987 |
| 6.830674 | 7.304456 | 5.130723 | 7.536965 | P | P | P | 7.269618 |
| 8.524697 |          |          | 9.079192 |   |   | A | 7.268032 |
| 9.859913 | 9.909404 | 10.48089 | 9.541638 | P | P | P | 10.1435  |
| 7.735357 | 7.38157  | 7.92235  | 8.448308 | P | P | M | 7.151804 |
| 10.90308 | 10.392   | 9.724299 | 9.595593 | P | P | P | 10.6343  |
| 11.53224 | 11.74159 | 11.25953 | 10.76705 | P | P | P | 11.45723 |
| 6.732077 | 5.877675 | 5.994521 | 4.870679 | P | P | P | 6.102605 |
| 9.735891 | 9.796732 | 8.840948 | 9.170228 | P | P | P | 10.14742 |
|          |          |          | P        |   |   |   | 4.482111 |
| 7.269255 | 8.114959 | 7.188136 | 6.882402 | P | P | P | 7.585548 |
| 9.823084 | 11.09826 | 12.07568 | 12.10554 | A | A | P | 11.60705 |
| 12.27976 | 11.45991 | 10.97517 | 10.728   | P | P | P | 11.62119 |
| 11.58279 | 11.49475 | 10.54213 | 10.52701 | P | P | P | 11.51299 |
| 10.485   | 11.43337 | 12.30264 | 12.66567 | P | P | P | 12.36356 |
| 8.446077 | 8.392179 | 7.850962 | 7.630748 | P | P | P | 8.765502 |
| 11.78494 | 12.00389 | 10.16629 | 10.48224 | P | P | P | 11.59403 |
| 10.29703 | 10.74988 | 9.125233 | 8.108006 | P | P | P | 10.12318 |
| 11.90223 | 11.57452 | 12.70238 | 12.6695  | P | P | P | 11.58019 |
| 5.560918 |          | 5.342122 | P        |   | P |   | 6.587855 |
| 10.87779 | 10.79209 | 11.72994 | 11.24924 | P | P | P | 10.91917 |
| 12.01128 | 11.71091 | 12.49396 | 12.60139 | P | P | P | 11.9629  |
| 10.39589 | 10.52991 | 10.74878 | 9.197465 | P | P | P | 10.3907  |
| 7.381297 | 7.349789 | 7.315743 | 7.163698 | P | P | P | 6.935444 |
| 14.61404 | 14.68053 | 15.25911 | 15.96555 | P | P | P | 14.89663 |
| 9.499089 | 10.00716 | 9.091188 | 8.978553 | P | P | P | 9.451871 |
| 11.29474 | 11.21819 | 11.86971 | 12.44387 | P | P | P | 11.4991  |
| 6.28902  | 5.972264 | 7.807119 | 6.874446 | P | P | A | 6.44983  |
| 11.44818 | 12.55139 | 11.0398  | 10.37634 | P | P | P | 12.65568 |

|          |          |          |          |   |   |   |          |
|----------|----------|----------|----------|---|---|---|----------|
| 12.47475 | 11.22724 | 12.38609 | 12.37901 | P | P | P | 11.06393 |
| 9.806896 | 8.88708  | 9.710846 | 9.603809 | P | P | P | 7.99134  |
| 10.80837 | 11.46684 | 13.59706 | 14.28375 | P | P | P | 11.35118 |
| 9.854543 | 10.02524 | 9.398299 | 8.490565 | P | P | P | 9.765548 |
|          |          | 5.294779 |          |   | P |   |          |
| 6.759162 | 7.217606 | 7.338358 | A        | P | P |   | 5.563211 |
| 11.31126 | 11.06935 | 10.10394 | 10.5709  | P | P | P | 11.73095 |
| 13.45929 | 13.3546  | 12.67113 | 12.54826 | P | P | P | 13.31768 |
| 9.553076 | 9.277429 | 9.522169 | 10.08075 | P | P | P | 9.889292 |
| 6.501313 | 6.443228 | 5.665017 | 3.500705 | P | P | P | 5.946982 |
| 11.92599 | 11.91111 | 11.44705 | 11.84025 | P | P | P | 13.01327 |
| 9.205102 | 7.61886  | 7.978506 | 7.287853 | P | P | P | 7.946727 |
| 5.752234 | 6.995298 |          | 7.494937 | P |   | P | 7.052372 |
| 11.26613 | 12.17491 | 11.05022 | 10.44433 | P | P | P | 11.90077 |
| 10.96038 | 10.81526 | 10.05047 | 9.80994  | P | P | P | 10.59618 |
| 12.16353 | 12.12293 | 11.82634 | 11.73608 | P | P | P | 12.33575 |
| 10.35573 | 10.04516 | 9.335916 | 9.243018 | P | P | P | 10.36191 |
| 11.18785 | 11.55707 | 10.77286 | 10.01675 | P | P | P | 11.02263 |
| 14.46917 | 14.33677 | 12.48043 | 13.35965 | P | P | P | 14.82438 |
| 8.755314 | 8.68886  | 9.5551   | 9.262189 | P | P | P | 8.560305 |
| 7.962654 | 8.604069 | 7.839873 | 7.163998 | P | P | P | 8.483354 |
| 6.167186 |          | 5.814424 | 5.120445 |   | P | P | 6.644161 |
| 9.919262 | 9.929648 | 8.570343 | 7.293451 | P | P | P | 9.475182 |
|          |          |          | 8.300424 |   |   | P |          |
| 12.81658 | 12.83229 | 10.09295 | 10.71196 | P | P | P | 13.00219 |
| 10.76692 | 10.51537 | 11.43882 | 12.24459 | P | P | P | 10.9048  |
| 6.159895 | 1.915324 | 3.718168 | 6.59115  | M | P | P | 6.066295 |
| 10.67607 | 10.7663  | 10.47374 | 9.674748 | P | P | P | 10.79943 |
| 13.69097 | 13.85305 | 13.05268 | 12.55022 | P | P | P | 13.76418 |
| 12.70655 | 12.16228 | 12.65208 | 11.87373 | P | P | P | 12.41698 |
| 9.641335 | 9.763106 | 8.871719 | 9.255543 | P | P | P | 8.587273 |
| 8.958187 | 8.919395 | 8.16073  | 8.219821 | P | P | P | 8.740891 |
| 8.628338 | 9.377642 | 8.549358 | 7.636149 | P | P | P | 8.673837 |
| 10.04347 | 10.1281  | 8.979666 | 7.940733 | P | P | P | 9.253878 |
| 10.2407  | 10.54685 | 9.093442 | 8.772041 | P | P | P | 10.4006  |
| 9.577543 | 10.22306 | 9.395095 | 8.151478 | P | P | P | 9.663875 |
| 11.50503 | 11.86722 | 10.95475 | 10.35215 | P | P | P | 11.52815 |
| 7.346468 | 6.09339  | 7.189868 | 8.023759 | P | M | P | 6.680358 |
| 11.40983 | 11.14904 | 11.99912 | 12.25237 | P | P | P | 10.94583 |
| 10.20491 | 10.40962 | 9.562825 | 9.184775 | P | P | P | 10.45391 |



|          |          |          |            |   |   |   |          |
|----------|----------|----------|------------|---|---|---|----------|
| 7.938848 | 7.621492 | 7.325552 | 7.488736 M | P | P | P | 6.716043 |
|          | 6.099949 | 6.76199  |            | P | A |   |          |
| 8.168695 | 8.614755 | 7.85664  | 7.620394 P | P | P | P | 8.974789 |
| 11.04534 | 10.98497 | 10.28781 | 10.08625 P | P | P | P | 10.91225 |
| 10.11771 | 10.37675 | 9.621354 | 9.178615 P | P | P | P | 10.04238 |
|          |          | 7.61439  |            |   |   | A |          |
| 10.29584 | 10.35625 | 10.98702 | 11.17543 P | P | P | P | 10.30967 |
| 8.510397 | 8.422878 | 10.06207 | 10.17424 P | P | P | P | 8.587009 |
| 9.171836 | 8.87341  | 10.47121 | 11.01922 P | P | P | P | 9.227872 |
| 9.766283 | 9.334687 | 10.27924 | 9.620531 P | P | P | P | 9.664253 |
| 11.48774 | 12.59891 | 11.57119 | 10.80608 P | P | P | P | 12.29522 |
| 6.428751 | 5.564979 |          | 6.616558 P | P |   | A | 4.907397 |
| 6.891645 |          |          | A          |   |   |   | 5.785902 |
| 10.50432 | 10.46647 | 9.756853 | 9.611076 P | P | P | P | 10.29825 |
| 9.268474 | 9.773133 | 10.59725 | 10.72618 P | P | P | P | 9.517114 |
| 10.00251 | 9.886387 | 9.634289 | 9.461931 P | P | P | P | 9.275128 |
| 9.294975 | 9.764401 | 8.834209 | 8.594018 P | P | P | P | 9.64465  |
| 6.806496 | 7.139887 | 6.201374 | 6.979031 P | P | P | P | 6.651923 |
|          |          | 7.000659 | 7.053258   |   | P | A |          |
| 10.36236 | 10.48887 | 9.618111 | 9.092052 P | P | P | P | 10.46037 |
| 9.813889 |          | 9.207068 | 9.481392 A |   | A | A | 7.574022 |
| 11.41116 | 11.67586 | 11.75639 | 12.87681 P | P | P | P | 12.32408 |
| 11.43028 | 11.23073 | 11.81058 | 12.56027 P | P | P | P | 11.1734  |
| 9.004391 | 7.033014 | 9.201851 | 8.496301 P | P | P | P | 8.197429 |
| 9.742043 | 9.651204 | 8.600697 | 9.054832 P | P | P | P | 9.234709 |
| 9.530284 | 9.262573 | 10.16502 | 9.991269 P | P | P | P | 9.934093 |
| 5.519796 |          |          | 2.780506 P |   |   | P | 5.626729 |
| 11.02283 | 11.02578 | 11.65933 | 11.29734 P | P | P | P | 10.86236 |
| 11.79843 | 12.54937 | 11.9825  | 11.10403 P | P | P | P | 12.54674 |
| 10.96054 | 9.882902 | 9.206284 | 6.819439 P | P | P | M | 9.884248 |
| 12.11363 | 11.74771 | 10.9621  | 10.94621 P | P | P | P | 11.81648 |
| 10.64357 | 11.84616 | 10.80744 | 10.1205 P  | P | P | P | 11.61332 |
| 9.993948 | 9.238647 | 9.905294 | 9.818257 P | P | P | P | 10.01276 |
| 11.64506 | 10.18209 | 10.85731 | 10.97677 P | P | P | P | 10.6238  |
| 10.03105 | 10.04235 | 9.340281 | 8.694931 P | P | P | P | 9.750655 |
| 5.905134 | 5.803022 | 7.305125 | 7.40129 P  | P | M | P | 7.305962 |
| 8.592009 | 8.473221 | 10.06668 | 9.846543 P | P | P | P | 8.78554  |
| 11.88614 | 11.52401 | 11.13424 | 11.46392 P | P | P | P | 11.58484 |
| 6.559354 | 5.672367 | 6.505851 | A          | M | P |   | 4.133589 |
| 11.81773 | 12.92868 | 12.13448 | 10.66444 P | P | P | P | 12.35821 |

|          |          |          |            |   |   |   |          |
|----------|----------|----------|------------|---|---|---|----------|
| 7.149856 | 6.854196 | 5.846996 | A          | P | P |   | 7.43135  |
| 7.947787 | 8.772572 | 8.086103 | 6.280687 P | P | P | P | 8.29721  |
| 7.961234 | 7.616107 | 7.919399 | 8.650961 P | P | P | P | 8.103684 |
| 7.847361 | 9.638451 | 8.820642 | 9.415216 P | P | P | P | 9.06332  |
| 6.352853 | 11.49399 | 5.201074 | 8.949044 P | A | P | P | 6.97469  |
| 10.78665 | 12.10771 | 12.03618 | 10.87213 P | P | P | P | 12.16423 |
| 5.208684 | 4.863926 | 3.949632 | A          | A | P |   | 5.514686 |
| 8.512625 | 8.744507 | 7.890868 | 7.705997 P | P | P | P | 8.744085 |
| 13.16774 | 12.70297 | 12.07902 | 11.50337 P | P | P | P | 13.11938 |
| 11.66104 | 12.582   | 12.3853  | 12.01368 P | P | P | P | 12.78372 |
| 5.477364 |          | 3.077696 | P          |   | P |   | 6.165279 |
| 12.19404 | 12.67428 | 11.82986 | 11.22419 P | P | P | P | 12.57036 |
| 9.734898 | 9.506429 | 9.968769 | 9.366508 P | P | P | P | 9.591613 |
| 9.528399 | 9.328207 | 9.502274 | 10.45352 P | P | P | P | 9.079191 |
| 9.687471 | 9.571689 | 8.534507 | 8.723671 P | P | P | P | 9.952432 |
| 10.02387 | 10.26471 | 11.31504 | 10.67765 P | P | P | P | 9.68994  |
| 7.60211  | 7.586869 | 6.7669   | 6.508232 P | P | P | P | 7.45785  |
|          | 6.433946 | 6.174899 |            | P | P |   |          |
| 8.567708 | 7.181313 | 8.353436 | 9.50911 P  | P | P | P | 8.393778 |
| 6.799967 | 4.940184 | 7.040761 | 7.034751 M | P | P | A | 6.041122 |
| 6.369937 | 6.918117 | 5.69693  | A          | P | P |   | 6.518381 |
| 9.832478 | 9.303601 | 10.18068 | 11.12296 P | P | P | P | 9.209636 |
| 7.104394 | 6.769551 | 7.285635 | 8.596205 P | P | P | P | 7.700132 |
| 8.491362 | 8.810321 | 8.023951 | 7.064721 P | P | P | P | 7.735282 |
| 9.003033 | 8.976447 | 6.660211 | 7.869303 P | P | P | P | 9.116179 |
| 8.008956 | 7.926753 | 6.644481 | 6.25583 P  | P | P | P | 8.10706  |
| 8.807081 | 8.352918 | 9.455345 | 8.995229 P | P | P | P | 7.929507 |
| 5.206688 | 5.883637 |          | A          | A |   |   | 3.880698 |
| 7.925417 | 7.962118 | 7.118115 | 6.840209 P | P | P | P | 7.827888 |
| 9.488076 | 10.55346 | 13.44359 | 13.28661 P | P | P | P | 7.422105 |
| 10.63245 | 10.54443 | 9.789331 | 9.542648 P | P | P | P | 10.55581 |
| 9.327225 | 9.881011 | 10.37773 | 11.37622 P | P | P | P | 10.34299 |
| 11.10149 | 11.5476  | 12.12097 | 12.26904 P | P | P | P | 11.46058 |
| 8.416068 | 7.297536 | 7.153432 | 7.353838 P | P | P | P | 7.306349 |
| 10.34475 | 11.20017 | 10.47791 | 10.20207 P | P | P | P | 11.80395 |
| 11.40362 | 12.03566 | 10.92886 | 11.48751 P | P | P | P | 12.06972 |
| 11.1692  | 11.32219 | 13.44216 | 14.00344 P | P | P | P | 10.72127 |
| 11.55855 | 11.89394 | 12.60855 | 12.78831 P | P | P | P | 12.42224 |
| 8.320501 | 7.904874 | 5.900604 | 7.662088 P | P | P | P | 7.150512 |
| 11.66163 | 12.34841 | 11.28306 | 10.66822 P | P | P | P | 12.09091 |

|          |          |          |          |   |   |   |          |
|----------|----------|----------|----------|---|---|---|----------|
| 11.61468 | 12.12354 | 10.98818 | 10.93763 | P | P | P | 11.96553 |
| 6.480734 | 6.614354 | 6.116334 | 6.944557 | P | M | P | 7.146408 |
| 5.583778 | 6.39888  | 6.247802 | P        | P | P |   | 6.137199 |
| 7.806884 | 7.600766 | 6.465719 | 7.791945 | P | P | P | 6.916588 |
| 9.987381 | 9.466269 | 9.917223 | 10.27599 | P | P | P | 9.461363 |
| 7.355683 |          |          | A        |   |   |   | 5.154566 |
| 8.103217 | 9.301886 | 8.522849 | 6.537282 | P | P | P | 8.129112 |
| 10.91966 | 10.72616 | 9.422633 | 7.899079 | P | P | P | 9.311737 |
| 9.66676  | 9.832014 | 10.29441 | 11.29114 | P | P | P | 10.09152 |
| 8.958057 | 8.245276 | 8.849052 | 8.185579 | P | P | P | 9.283834 |
| 12.56264 | 12.74701 | 11.9348  | 11.4652  | P | P | P | 13.13197 |
| 9.792455 | 10.00975 | 9.499954 | 8.747026 | P | P | P | 9.88763  |
| 11.59821 | 11.46558 | 12.6372  | 13.23116 | P | P | P | 11.50722 |
| 9.895822 | 9.759715 | 10.38287 | 9.853723 | P | P | P | 9.417856 |
| 8.574823 | 8.902726 | 8.249368 | 8.055515 | P | P | P | 8.945265 |
| 8.439496 | 7.839061 | 8.471192 | 9.353174 | P | A | A | 7.775075 |
|          |          | 1.55668  |          |   |   | M |          |
| 10.64503 | 10.65733 | 10.67239 | 10.86491 | P | P | P | 10.86803 |
| 5.553629 | 5.532871 | 7.648244 | 5.293607 | P | P | P | 7.626369 |
| 12.52998 | 12.4011  | 11.14699 | 10.94387 | P | P | P | 12.63729 |
| 11.97387 | 11.988   | 12.38912 | 12.60416 | P | P | P | 12.0846  |
| 9.179309 | 9.159267 | 9.941145 | 10.74911 | P | P | P | 9.333209 |
| 7.819501 | 7.614361 | 8.527098 | 9.280759 | P | M | A | 8.787916 |
| 10.88328 | 11.01008 | 10.34404 | 10.15286 | P | P | P | 10.90356 |
| 6.716022 | 5.842539 | 6.137574 | A        | A | P |   | 5.673259 |
| 9.333479 | 10.81289 | 10.29348 | 9.413821 | P | P | P | 10.9014  |
| 11.24781 | 11.60083 | 11.61052 | 12.4172  | P | P | P | 11.52029 |
| 11.72639 | 11.9748  | 11.61815 | 11.04113 | P | P | P | 11.54074 |
| 11.08347 | 10.34855 | 11.97359 | 11.4443  | P | P | P | 9.968701 |
| 11.75508 | 12.6578  | 11.371   | 10.74916 | P | P | P | 11.89097 |
| 8.464579 | 8.94653  | 8.846687 | 7.636372 | P | P | P | 8.836464 |
| 8.407159 | 9.758382 | 10.02699 | 9.304231 | P | P | P | 9.943336 |
| 9.173132 | 8.617284 | 8.058417 | 7.2766   | P | P | P | 8.66857  |
| 7.116533 | 8.113025 | 7.41811  | 5.928764 | P | P | P | 7.821041 |
| 11.30578 | 10.98236 | 11.73862 | 12.24339 | P | P | P | 11.60614 |
| 10.48915 | 10.43642 | 10.61653 | 11.77164 | P | P | P | 10.69185 |
| 9.383723 | 9.003244 | 9.541391 | 9.268282 | P | P | P | 9.37901  |
| 9.147816 | 8.702032 | 6.989407 | 7.395504 | P | P | P | 8.567865 |
| 9.166796 | 7.883542 | 7.505054 | 7.936472 | P | P | P | 8.181272 |
| 7.904758 | 6.70681  | 8.730196 | 8.71529  | P | P | P | 7.195967 |

|          |          |          |          |   |   |   |          |
|----------|----------|----------|----------|---|---|---|----------|
| 11.28796 | 11.27557 | 10.6453  | 10.98288 | P | P | P | 11.57955 |
| 10.65304 | 8.978743 | 9.303942 | 9.110141 | P | P | P | 9.533432 |
| 10.25965 | 10.60812 | 10.09757 | 8.974736 | P | P | P | 10.23    |
| 9.434906 | 9.097439 | 9.697426 | 9.788234 | P | P | P | 8.820727 |
| 10.07872 | 9.910013 | 9.514215 | 8.796912 | P | P | P | 10.09499 |
| 8.453853 | 8.67205  | 8.979889 | 9.966932 | P | P | P | 8.834718 |
| 11.98221 | 12.25698 | 11.15079 | 11.34491 | P | P | P | 12.35607 |
| 14.30959 | 14.16181 | 13.73272 | 13.38392 | P | P | P | 14.0688  |
| 11.89234 | 11.67283 | 12.85195 | 11.93032 | P | P | P | 12.83464 |
| 10.22803 | 9.50802  | 9.645359 | 9.670731 | P | P | P | 8.727334 |
| 10.77915 | 10.14651 | 9.180398 | 9.568328 | P | P | P | 9.331942 |
| 8.577837 | 8.370419 | 8.178148 | 8.754355 | P | P | P | 9.658304 |
| 7.740704 | 7.628378 | 6.36227  | 3.517749 | P | P | P | 7.113334 |
| 11.06246 | 11.95951 | 11.14188 | 10.73683 | P | P | P | 11.69408 |
| 11.88058 | 12.47156 | 11.82556 | 11.1089  | P | P | P | 12.18057 |
| 10.38674 | 11.26161 | 10.81881 | 10.07974 | P | P | P | 11.48713 |
| 9.416299 | 9.47278  | 10.42163 | 10.10187 | P | P | P | 9.316874 |
| 6.918938 | 7.033587 | 4.00196  | 6.96764  | P | P | P | 7.653851 |
| 9.548642 | 9.986568 | 8.959279 | 8.160311 | P | P | P | 9.872791 |
| 11.07262 | 11.13968 | 11.53786 | 12.22668 | P | P | P | 11.27083 |
| 10.98069 | 11.48592 | 10.54073 | 9.834616 | P | P | P | 11.13219 |
| 10.73205 | 11.53161 | 11.56042 | 11.69943 | P | P | P | 11.80916 |
| 9.394389 | 10.47779 | 11.4155  | 11.19042 | P | A | A | 9.371964 |
| 12.36833 | 12.06551 | 11.29733 | 11.38355 | P | P | P | 12.57878 |
| 10.62929 | 10.95257 | 10.72143 | 9.992061 | P | P | P | 9.672903 |
| 9.712214 | 9.689907 | 10.04811 | 10.94517 | P | P | P | 10.1731  |
| 8.674116 | 8.848043 | 8.414921 | 7.685872 | P | P | P | 8.090528 |
| 12.5821  | 12.03214 | 11.34931 | 12.01086 | P | P | P | 12.59407 |
| 12.628   | 12.47632 | 11.39557 | 11.42585 | P | P | P | 12.1883  |
| 10.14273 | 8.965107 | 9.256431 | 9.501879 | P | P | P | 8.891968 |
| 9.163098 | 8.465162 | 9.361836 | 9.240926 | P | P | P | 8.326763 |
| 8.088367 | 7.420901 | 7.258571 | 6.799023 | P | P | P | 8.1098   |
| 8.76002  | 8.528306 | 7.784232 | 7.902309 | P | P | P | 8.43655  |
| 6.130887 | 6.522168 | 6.212374 | 2.809195 | P | A | P | 6.821094 |
| 7.226502 | 7.571285 | 6.84803  | 6.568175 | P | P | P | 8.034682 |
| 7.650345 | 6.8706   | 8.752234 | 8.562741 | M | P | P | 6.45675  |
|          | 4.913614 | 6.803828 |          | P | P |   |          |
| 12.46422 | 12.12523 | 11.6442  | 11.39135 | P | P | P | 12.0692  |
| 11.83618 | 11.82762 | 10.24023 | 10.1381  | P | P | P | 12.09016 |
| 9.906654 | 9.032426 | 8.99586  | 8.38594  | P | P | P | 8.889094 |

|          |          |          |          |   |   |   |          |
|----------|----------|----------|----------|---|---|---|----------|
| 11.08693 | 11.27774 | 10.50856 | 10.77112 | P | P | P | 11.01067 |
| 10.81459 | 11.17228 | 10.18321 | 9.974488 | P | P | P | 10.96859 |
| 13.01811 | 13.3407  | 12.18543 | 12.08767 | P | P | P | 13.19731 |
| 7.772928 | 7.515242 | 7.599406 | A        | P | P |   | 6.258942 |
| 6.824045 | 7.729458 | 7.026531 | 6.712856 | P | P | P | 6.771683 |
| 11.27901 | 11.49672 | 12.0085  | 11.40388 | P | P | P | 11.47351 |
| 8.772132 | 6.993237 | 7.560159 | 8.02589  | P | P | P | 7.83859  |
| 9.895385 | 9.607711 | 8.835949 | 9.215694 | P | P | P | 9.922474 |
| 7.585695 | 8.004037 | 6.996463 | 6.899786 | P | P | P | 7.937901 |
| 9.642941 | 9.483765 | 8.44619  | 8.068967 | P | P | P | 9.234752 |
| 10.13679 | 12.37151 | 11.539   | 10.23579 | P | P | P | 11.72363 |
| 12.30761 | 10.53772 | 10.4727  | 11.98897 | P | P | P | 5.893717 |
| 11.94387 | 11.13791 | 10.81958 | 11.61386 | P | P | P | 12.23684 |
|          | 7.042342 | 6.069261 |          | P | P |   |          |
| 7.498935 | 8.050262 | 7.512689 | P        | P | P |   | 7.236576 |
| 9.493708 | 9.66425  | 9.143439 | 8.795846 | P | P | P | 10.19364 |
| 8.628937 | 6.775842 | 8.616282 | 8.784927 | P | A | A | 6.708743 |
| 6.611663 | 7.079936 | 7.7061   | 7.904152 | M | P | P | 8.129843 |
|          |          | 5.467641 |          |   | P |   |          |
| 9.806884 | 8.26356  | 9.362454 | 8.610422 | P | P | P | 7.366811 |
| 10.19701 | 10.35438 | 9.189578 | 9.247763 | P | P | P | 10.36966 |
| 7.791976 | 7.728094 | 6.172087 | 6.330761 | P | P | P | 7.38324  |
| 8.351349 | 8.427744 | 7.036191 | 7.917145 | P | P | P | 8.802415 |
| 8.815187 | 7.974744 | 7.860843 | 6.766922 | P | P | P | 7.785986 |
| 6.791782 | 6.458149 |          | A        | A |   |   | 5.63539  |
| 7.934351 | 8.17873  | 7.359958 | 7.365106 | P | P | M | 7.227305 |
| 10.12333 | 10.11948 | 9.459041 | 8.677299 | P | P | P | 9.793667 |
| 7.844935 | 7.667128 | 8.738353 | 8.087461 | P | P | P | 7.104024 |
|          |          | 5.296585 |          |   | P |   |          |
|          | 6.219374 |          | 8.012471 | A |   | M |          |
| 9.663132 | 9.849873 | 9.310893 | 8.372478 | P | P | P | 9.439238 |
| 10.52524 | 10.46776 | 11.30228 | 10.86012 | P | P | P | 9.458115 |
| 11.14483 | 11.16868 | 12.10047 | 12.25986 | P | P | P | 10.84627 |
| 11.07532 | 10.65733 | 10.43119 | 9.726419 | P | P | P | 10.5731  |
| 10.35543 | 10.72889 | 8.199327 | 9.472476 | P | P | P | 10.72288 |
| 11.43852 | 11.00395 | 11.49985 | 11.91259 | P | P | P | 11.38258 |
| 9.574647 | 9.413463 | 7.669802 | 7.848932 | P | P | P | 9.311543 |
| 11.08296 | 11.04255 | 10.74101 | 9.876615 | P | P | P | 11.1374  |
| 11.06152 | 11.19225 | 10.6537  | 9.700484 | P | P | P | 11.00186 |
| 9.07983  | 8.759332 | 7.742734 | 8.482366 | P | P | P | 9.090816 |

|          |          |          |          |   |   |   |          |
|----------|----------|----------|----------|---|---|---|----------|
| 11.6518  | 12.15356 | 11.46407 | 10.8733  | P | P | P | 11.74798 |
| 11.2046  | 11.20886 | 9.846993 | 10.06061 | P | P | P | 11.35734 |
| 8.951532 | 8.809078 | 8.021492 | 9.094056 | P | P | P | 8.7618   |
| 9.354851 | 11.04591 | 9.452855 | 8.469766 | P | P | P | 10.24841 |
| 7.870622 | 8.145927 | 7.058644 | 6.289326 | P | P | P | 7.983299 |
|          | 6.212261 |          | 7.512298 | P |   | P |          |
|          | 3.266423 |          |          | P |   |   |          |
| 4.754551 |          |          | M        |   |   |   | 6.0751   |
| 9.670864 | 8.897058 | 8.397161 | 8.281944 | P | P | P | 9.153827 |
| 9.085951 | 8.22529  | 7.405245 | 7.922868 | P | P | P | 8.158069 |
| 6.456771 | 6.26283  |          | A        | P |   |   | 5.236825 |
| 8.260682 | 8.82392  | 6.934765 | 6.71669  | A | P | P | 8.359503 |
| 7.372675 | 7.078752 | 7.423815 | 7.554888 | P | P | P | 6.557275 |
| 10.39456 | 10.68143 | 11.15164 | 11.96068 | P | P | P | 11.11123 |
| 11.71336 | 11.0716  | 10.32969 | 9.721596 | P | P | P | 11.09508 |
| 9.925785 | 10.62166 | 10.93012 | 11.84805 | P | P | P | 10.62135 |
| 11.48636 | 12.03704 | 10.25254 | 10.55817 | P | P | P | 12.21709 |
| 11.45774 | 10.49672 | 12.02374 | 12.01972 | P | P | P | 11.46943 |
| 5.857617 | 6.213907 | 6.545528 | P        | P | A |   | 6.621922 |
| 8.642259 | 8.714168 | 8.71199  | 9.400649 | A | P | P | 8.559661 |
| 7.890918 | 8.305053 | 6.586002 | 7.054188 | P | P | P | 7.952618 |
| 7.905053 | 7.019472 | 7.284551 | 6.716542 | P | P | P | 6.816207 |
| 11.83014 | 11.11753 | 12.35681 | 13.09465 | P | P | P | 11.31685 |
| 9.494714 | 9.235878 | 10.22979 | 10.4665  | P | P | P | 9.12201  |
| 10.81895 | 11.79975 | 10.14016 | 9.551991 | P | P | P | 11.38053 |
| 8.380208 | 8.650579 | 8.318293 | 7.576316 | P | P | P | 8.657788 |
| 9.711433 | 9.827113 | 9.272784 | 8.531521 | P | P | P | 9.415885 |
| 11.21188 | 10.75129 | 9.806866 | 9.729959 | P | P | P | 11.11286 |
| 9.536196 | 8.734622 | 8.963624 | 9.291654 | P | P | P | 9.839597 |
| 9.386586 | 8.753856 | 9.930387 | 9.838882 | P | P | P | 7.404694 |
| 11.83406 | 11.88916 | 12.16387 | 12.88857 | P | P | P | 11.80671 |
| 12.8461  | 12.30004 | 13.06053 | 13.70042 | P | P | P | 13.14498 |
| 6.962001 | 11.5085  | 11.43728 | 10.52323 | P | P | P | 11.22474 |
| 13.11717 | 12.64361 | 12.52345 | 12.16515 | P | P | P | 12.66873 |
| 11.70407 | 11.93095 | 12.48841 | 12.4943  | P | P | P | 12.24578 |
|          | 3.201332 |          |          | P |   |   |          |
| 10.74035 | 10.47713 | 11.04016 | 11.5085  | P | P | P | 10.68239 |
| 11.41448 | 11.82318 | 11.02618 | 10.04426 | P | P | P | 11.17692 |
| 7.493989 | 7.21665  | 6.634925 | 7.382964 | P | P | P | 7.465241 |
| 9.430467 | 9.146096 | 9.319979 | 8.097316 | P | P | P | 8.854146 |

|          |          |          |          |   |   |   |          |
|----------|----------|----------|----------|---|---|---|----------|
| 9.454433 | 8.894032 | 9.995252 | 9.298765 | P | P | P | 8.833628 |
| 10.95244 | 10.43249 | 9.812727 | 9.332118 | P | P | P | 10.44106 |
| 8.038058 | 6.871971 | 8.383657 | 9.838084 | P | P | P | 8.37812  |
| 8.823298 | 8.825418 | 10.00985 | 9.868783 | P | P | P | 8.122444 |
| 8.912396 | 7.066511 | 7.827159 | 6.54103  | P | P | P | 7.352171 |
| 8.346692 | 7.724747 | 7.184637 | 6.547973 | P | P | P | 7.9806   |
| 9.68979  | 8.949905 | 9.605485 | 9.054969 | P | P | P | 8.581584 |
| 11.43272 | 10.12795 | 9.858528 | 10.04696 | P | P | P | 9.35592  |
| 8.863091 | 9.594838 | 8.594635 | 8.130478 | P | P | P | 9.429295 |
| 6.976173 | 7.03619  | 7.106259 | 7.268942 | P | P | A | 6.527093 |
| 11.12082 | 11.61844 | 11.88081 | 12.8464  | P | P | P | 11.66385 |
| 7.192067 | 7.701242 | 7.607214 | 7.603443 | P | P | P | 7.592306 |
| 9.152194 | 9.493438 | 8.628623 | 8.170191 | P | P | P | 8.64444  |
| 10.43274 | 9.800635 | 9.3974   | 9.447008 | P | P | P | 10.16136 |
| 9.897281 | 10.46771 | 10.00975 | 8.946851 | P | P | P | 10.10193 |
| 8.41271  | 8.331888 | 9.827337 | 8.899903 | P | P | P | 8.023959 |
| 11.96487 | 12.2281  | 11.40649 | 11.22419 | P | P | P | 12.2277  |
| 8.764759 | 8.748801 | 7.764457 | 7.026298 | P | P | P | 7.453799 |
| 10.71348 | 11.0512  | 8.850894 | 8.529771 | P | P | P | 10.74889 |
| 11.59061 | 11.57513 | 12.29594 | 13.31568 | P | P | P | 11.91201 |
| 8.743501 | 7.666019 | 9.146438 | 9.191758 | P | P | P | 8.095488 |
| 8.265494 | 7.440711 | 7.250651 | 6.702228 | P | P | P | 7.288312 |
| 5.758175 | 5.825559 | 5.472869 | 1.826991 | A | P | P | 4.612302 |
| 11.91864 | 12.28647 | 12.3281  | 12.04321 | P | P | P | 13.00841 |
| 8.750213 | 8.94068  | 7.693093 | 7.54214  | P | P | P | 8.793824 |
| 10.21762 | 11.5377  | 10.69826 | 10.31644 | P | P | P | 11.64057 |
| 5.485816 | 5.030857 |          | 3.208148 | P |   | P | 5.618553 |
| 11.94881 | 12.5117  | 11.9393  | 11.40299 | P | P | P | 12.42014 |
| 11.73704 | 12.02247 | 11.28891 | 10.65038 | P | P | P | 11.97989 |
| 9.683566 | 10.04354 | 9.32586  | 8.041459 | P | P | P | 10.44383 |
| 10.10564 | 10.28106 | 9.351131 | 9.038838 | P | P | P | 10.08786 |
| 9.747949 | 10.17714 | 9.372739 | 8.92849  | P | P | P | 9.96147  |
| 10.51533 | 10.324   | 9.696959 | 9.950907 | P | P | P | 10.56282 |
| 11.08404 | 9.404193 | 11.30638 | 11.30968 | P | P | P | 8.605568 |
| 7.412661 | 7.220125 | 8.34047  | 8.459038 | P | M | A | 7.708636 |
| 8.046777 | 9.64686  | 9.500772 | 8.861023 | P | P | P | 9.307732 |
| 9.993941 | 9.776505 | 8.784458 | 8.488048 | P | P | P | 9.310142 |
| 11.71689 | 11.58765 | 11.11575 | 10.5802  | P | P | P | 11.49271 |
| 9.423208 | 9.612351 | 9.986197 | 9.578122 | P | P | P | 9.330284 |
| 9.34096  | 9.82429  | 9.462707 | 8.744164 | P | P | P | 9.289726 |

|          |          |          |          |   |   |   |          |
|----------|----------|----------|----------|---|---|---|----------|
| 11.18282 | 12.6277  | 12.15325 | 11.38233 | P | P | P | 12.60893 |
| 6.276258 | 6.117191 |          | 7.039529 | M | P | A | 7.325746 |
| 11.28331 | 11.37386 | 12.4568  | 12.12915 | P | P | P | 11.95537 |
| 8.66863  | 7.771488 | 9.561719 | 9.931235 | P | P | P | 8.255211 |
| 10.93694 | 10.80928 | 10.24698 | 9.979268 | P | P | P | 10.59154 |
| 9.390147 | 9.283345 | 8.429791 | 8.189466 | P | P | P | 8.979952 |
| 8.869263 | 9.004449 | 9.173929 | 10.02171 | P | P | P | 8.518776 |
| 12.89823 | 12.39615 | 10.75646 | 11.03974 | P | P | P | 12.96965 |
| 10.66836 | 11.96444 | 11.54417 | 11.88517 | P | P | P | 12.15182 |
| 9.933208 | 8.898191 | 10.43912 | 11.18069 | P | P | P | 10.48    |
| 10.23363 | 9.256098 | 10.79822 | 9.857245 | P | P | P | 9.125129 |
| 5.48081  | 6.119782 | 6.188958 |          | P | P |   | 6.929268 |
| 6.568417 | 6.659647 | 6.21281  | 6.118981 | P | P | P | 6.710598 |
| 9.679014 | 9.765945 | 10.16085 | 10.43167 | P | P | P | 9.764219 |
| 8.327472 | 8.06101  | 10.56092 | 11.01026 | P | P | P | 7.724192 |
|          |          | 5.465233 | 7.361371 |   | P | A |          |
| 11.86202 | 11.67508 | 12.92185 | 12.51021 | P | P | P | 10.61438 |
| 9.392476 | 9.610974 | 10.63391 | 10.54113 | P | P | P | 9.618897 |
| 4.765464 |          |          | P        |   |   |   | 6.313758 |
| 8.034577 | 8.246153 | 7.818234 | 7.18326  | P | P | P | 7.203068 |
| 11.23162 | 11.0918  | 10.92406 | 10.30945 | P | P | P | 11.02069 |
| 6.635183 | 4.375121 | 5.406714 |          | P | P |   | 6.08834  |
|          | 6.910796 | 4.41834  |          | P | M |   |          |
| 9.434986 | 8.435394 | 8.877022 | 8.776316 | P | P | P | 8.201439 |
|          | 6.875993 | 4.893736 |          | A | P |   |          |
|          | 5.659765 | 4.879371 | 5.549475 | P | P | P |          |
| 6.749532 | 6.36242  |          | P        | P |   |   | 6.608023 |
| 6.700065 | 6.599113 | 6.700939 | 6.348179 | P | P | P | 6.68501  |
| 9.856697 | 10.04434 | 10.2565  | 9.216634 | P | P | P | 8.716993 |
| 6.968167 | 7.450226 | 8.529556 | 6.840369 | P | P | P | 6.368401 |
| 6.080782 | 3.887417 |          | A        | P |   |   | 6.240446 |
|          | 5.19293  |          | 1.62634  | A |   | P |          |
| 7.801919 | 8.394104 | 7.628892 | 6.829022 | P | P | P | 7.881268 |
| 5.321372 | 6.503611 | 5.634228 |          | P | P |   | 6.743194 |
| 7.179652 | 6.844944 | 7.461557 | 6.230389 | P | P | P | 6.101508 |
| 6.397259 | 6.214434 | 6.115414 | 6.355629 | A | P | P | 4.829828 |
|          | 6.441358 | 5.485314 |          | P | M |   |          |
| 5.787502 | 5.278212 | 5.666634 |          | P | A |   | 5.868958 |
| 6.113557 | 5.143111 | 4.676778 | 4.619687 | A | P | M | 5.174273 |
| 10.43902 | 9.163883 | 9.999419 | 10.62699 | P | P | P | 9.079772 |



|          |          |          |            |   |   |   |          |
|----------|----------|----------|------------|---|---|---|----------|
|          | 4.067954 | 3.492536 |            | A | P |   |          |
|          | 2.610521 |          |            | P |   |   |          |
| 7.925456 | 7.540333 | 8.543138 | 9.11578 P  | P | P | P | 8.411611 |
| 9.847484 | 9.05272  | 10.83516 | 11.49327 P | P | P | P | 9.434994 |
| 8.012288 |          | 9.09392  | 9.222216 A |   | A | P | 7.14862  |
| 6.603364 |          | 5.96765  | 3.726271 P |   | P | M | 6.881635 |
| 5.244431 | 5.718079 |          | P          | P |   |   | 6.592762 |
| 7.067974 | 7.357558 | 6.949616 | 5.744272 P | P | P | P | 6.675945 |
|          | 5.796783 | 6.892066 | 5.585284   | P | P | P |          |
|          | 5.463602 | 5.352161 |            | A | P |   |          |
| 9.436439 | 9.273348 | 9.931982 | 10.82529 P | P | P | P | 9.307297 |
| 7.4718   | 8.652153 | 6.422834 | 5.418459 P | P | P | P | 8.477992 |
| 8.183748 | 8.007482 | 7.810709 | 6.710012 P | P | P | P | 7.719199 |
| 6.099213 | 7.678249 | 5.805297 | 6.332162 P | A | P | P | 6.75525  |
|          | 4.113944 |          |            | P |   |   |          |
| 6.076127 | 4.814698 | 6.167059 | 5.037539 P | P | A | P | 6.750041 |
| 6.273105 | 6.15878  | 7.382004 | 7.317047 M | A | P | A | 7.018444 |
| 6.434941 | 5.897039 | 6.877414 | 5.126072 P | P | P | P | 6.69736  |
| 10.15068 | 10.87912 | 9.291956 | 9.182989 P | P | P | P | 10.43863 |
| 11.06588 | 12.58423 | 10.83968 | 10.82849 P | P | P | P | 12.18445 |
| 6.604161 | 6.156968 | 5.731015 | 4.567429 P | P | P | P | 6.302085 |
| 7.707815 | 8.942657 | 8.637983 | 8.010591 P | P | P | P | 8.591759 |
| 8.364496 | 8.717382 | 7.401972 | 7.539973 P | P | P | P | 7.648132 |
|          | 5.042045 |          | 4.381555   | P |   | P |          |
| 9.098936 | 9.130732 | 10.33251 | 10.98843 P | P | P | P | 9.723263 |
| 4.311751 |          | 5.080493 | M          |   | M |   | 5.229691 |
| 4.06902  |          |          | 6.011734 M |   |   | P | 5.898086 |
| 5.488086 |          | 6.306725 | A          |   | P |   | 2.834218 |
|          |          | 7.066348 |            |   | A |   |          |
|          | 5.73025  |          | 2.342032   | P |   | P |          |
| 6.097123 | 5.809123 | 3.557861 | 5.802627 P | M | P | A | 6.252722 |
|          |          | 1.64364  |            |   | P |   |          |
| 7.47994  | 8.149429 | 8.779004 | 8.618737 P | P | P | P | 7.702056 |
|          |          |          | 6.447019   |   |   | A |          |
| 6.507289 | 6.930759 |          | 7.763058 P | P |   | P | 7.717284 |
| 6.746506 | 5.654016 | 5.856316 | A          | A | A |   | 5.640618 |
|          | 5.58854  | 6.499967 | 0.82245    | P | P | P |          |
| 10.48576 | 10.51408 | 10.28909 | 9.820533 P | P | P | P | 10.49744 |
| 8.356323 | 9.275826 | 8.642745 | 7.924542 P | P | P | P | 8.253471 |
|          | 2.105418 |          |            | P |   |   |          |

|          |          |          |          |   |   |   |   |          |
|----------|----------|----------|----------|---|---|---|---|----------|
| 7.195078 | 7.221199 | 6.576692 | 6.719829 | P | A | P | P | 7.052208 |
|          | 5.506738 | 7.167371 |          |   | P | A |   |          |
|          | 6.755674 |          | 6.930693 |   | A |   | A |          |
| 10.49955 | 10.24199 | 9.569087 | 8.606753 | P | P | P | P | 10.02878 |
| 5.158145 |          |          |          | P |   |   |   | 6.652543 |
| 11.16287 | 11.43239 | 10.86105 | 10.25869 | P | P | P | P | 11.01189 |
| 6.111584 | 4.932322 |          |          | A | P |   |   | 5.247671 |
|          | 4.390039 |          |          |   | P |   |   |          |
|          | 5.230634 |          | 6.098953 |   | M |   | P |          |
|          | 4.80581  | 6.157917 | 4.306215 |   | A | M | P |          |
| 7.595942 | 8.476724 | 6.742832 | 6.226343 | P | P | P | P | 8.564888 |
| 7.161863 | 7.15176  | 8.446885 | 8.846836 | A | P | P | A | 6.032431 |
| 6.213342 | 6.629677 | 6.708236 |          | P | A | P |   | 6.827289 |
| 5.581499 |          | 6.344033 | 6.0759   | P |   | P | A | 6.993686 |
| 5.83875  | 5.379985 |          | 2.005032 | A | A |   | P | 6.278678 |
| 5.542031 | 6.187538 |          |          | P | A |   |   | 5.773552 |
| 6.787656 | 7.105996 | 6.92072  | 6.561242 | P | P | P | A | 7.080479 |
| 7.812975 | 7.512812 | 7.070023 | 7.956402 | P | P | P | P | 6.798436 |
| 7.23901  | 7.183959 | 7.598791 |          | A | P | A |   | 6.403159 |
| 6.145373 |          |          | 7.086027 | A |   |   | M | 3.424318 |
|          |          |          | 7.179091 |   |   |   | A |          |
| 4.941705 |          |          |          | A |   |   |   | 3.060745 |
| 4.536721 |          |          | 2.657196 | P |   |   | M | 5.680268 |
| 8.13098  | 8.476189 | 8.515373 | 7.012466 | P | P | P | P | 7.956155 |
| 4.954861 | 5.467951 | 5.20462  | 6.437894 | P | P | P | A | 6.323766 |
| 11.42051 | 12.04906 | 10.59041 | 10.55504 | P | P | P | P | 11.62674 |
| 10.87355 | 11.57594 | 10.37864 | 10.45387 | P | P | P | P | 11.38785 |
|          |          | 6.439796 |          |   |   | A |   |          |
| 6.394476 | 4.863532 | 4.767421 |          | P | P | P |   | 5.979134 |
| 5.80794  | 6.694375 | 6.282273 |          | P | P | P |   | 6.373176 |
| 5.560926 |          |          |          | M |   |   |   | 7.129592 |
| 6.699149 | 6.501836 |          | 8.258281 | P | P |   | A | 7.733    |
| 6.858845 | 6.332538 | 6.608537 | 5.83248  | A | P | P | P | 4.928797 |
|          | 5.328247 | 6.023151 |          |   | A | A |   |          |
| 7.046424 | 8.625982 | 6.78098  |          | P | P | P |   | 7.903159 |
| 4.416366 |          |          |          | P |   |   |   | 5.963446 |
|          |          |          | 9.245107 |   |   |   | A |          |
|          | 6.480534 |          |          |   | P |   |   |          |
| 6.393301 |          | 6.326727 | 6.837924 | A |   | P | P | 2.851082 |
|          |          | 4.093462 |          |   |   | M |   |          |

|          |          |          |          |          |   |   |   |          |
|----------|----------|----------|----------|----------|---|---|---|----------|
| 6.895476 | 6.913691 | 6.044384 | 7.617294 | P        | A | P | P | 7.054805 |
| 6.754183 | 7.299541 | 7.528952 | 1.774449 | P        | P | P | P | 6.922004 |
| 8.020191 | 8.829304 | 6.997595 | 7.902287 | P        | P | P | P | 8.282057 |
|          |          | 6.616899 |          |          |   | A |   |          |
| 8.087675 | 8.360551 | 8.373026 | 7.265737 | A        | P | A | P | 7.70275  |
| 5.594563 | 4.136184 | 4.277335 | 5.222984 | A        | A | P | P | 3.930386 |
|          | 5.668612 |          |          | A        |   |   |   |          |
| 10.72039 | 10.51837 | 10.48457 | 9.849729 | P        | P | P | P | 10.36495 |
| 7.010792 | 6.914972 | 7.445171 | 8.372852 | P        | P | P | P | 7.31822  |
|          | 6.425607 | 4.540371 |          | A        | P |   |   |          |
| 6.672542 | 5.758619 | 5.148498 |          | P        | P |   |   | 5.923796 |
| 9.082849 | 9.443156 | 8.448923 | 9.122595 | P        | P | P | P | 8.809677 |
| 4.977001 |          | 6.881823 |          |          | A |   |   | 4.843936 |
| 8.396628 | 8.810112 | 8.902127 | 7.715974 | P        | P | P | P | 8.974875 |
| 12.56451 | 10.85189 | 11.11469 | 11.87978 | P        | P | P | P | 11.23305 |
| 6.777919 | 6.548812 | 7.990288 | 8.036818 | M        | P | P | A | 6.395854 |
| 8.337269 | 9.021633 | 7.410919 | 8.465156 | P        | P | P | P | 9.466858 |
| 7.060822 | 6.110521 | 6.374332 | 7.4996   | P        | A | P | P | 6.698539 |
|          | 6.905578 | 5.287334 |          | P        | P |   |   |          |
|          | 6.255489 | 6.854557 | 7.125358 | A        | P | P | A |          |
| 5.792075 | 6.197202 | 3.792538 | 6.233736 | P        | P | P | P | 5.826073 |
| 8.590562 | 8.724286 | 9.046721 | 8.601952 | P        | P | P | P | 7.991521 |
| 4.962316 |          |          |          | A        |   |   |   | 3.735726 |
|          |          |          | 2.772151 |          |   |   | P |          |
| 9.935892 | 9.586323 | 10.32632 | 10.0703  | P        | P | P | P | 9.219015 |
| 9.577383 | 8.891023 | 9.445352 | 9.456842 | P        | P | P | P | 8.586556 |
| 11.17362 | 10.88545 | 9.8746   | 9.548655 | P        | P | P | P | 10.9915  |
|          | 6.057116 | 5.87834  | 7.341593 | A        | P | P | A |          |
| 9.676896 | 10.35331 | 8.367713 | 8.416217 | P        | P | P | P | 10.10565 |
|          | 5.746464 | 5.863923 | 7.484293 | P        | P | P | M |          |
|          | 6.732622 | 6.456211 |          | P        | P |   |   |          |
| 5.331342 | 7.004551 | 6.508893 | 6.651818 | P        | P | P | P | 6.511106 |
|          | 4.053509 |          | 7.680473 | P        |   |   | P |          |
| 5.146759 | 6.155679 |          | 5.41185  | A        |   |   | M | 2.719934 |
|          | 6.85566  | 8.594694 | 8.125508 | 7.969658 | P | P | P | 8.002793 |
| 7.525208 | 7.468113 | 7.293128 | 8.035837 | P        | P | P | A | 6.948204 |
| 8.427257 | 8.621199 | 7.618717 | 7.657568 | P        | P | P | P | 8.484268 |
| 7.288878 | 7.160761 | 5.729269 | 3.385178 | P        | P | P | P | 7.760527 |
| 7.526306 | 7.326793 | 7.526625 | 8.305266 | P        | A | A | A | 7.497826 |
|          | 5.62075  |          |          | A        |   |   |   |          |

|          |          |            |            |   |   |   |          |
|----------|----------|------------|------------|---|---|---|----------|
| 7.699872 | 8.10184  | 7.033075   | 8.02301 P  | P | P | P | 7.733921 |
| 8.542701 | 8.781751 | 7.207913   | 5.953327 P | P | P | P | 8.570176 |
|          | 6.088052 | 6.839456   | 7.072345   | A | P | A |          |
| 9.380956 | 9.39958  | 9.934122   | 11.44307 P | P | P | P | 9.468129 |
| 7.859839 | 8.134249 | 7.420574   | 6.555883 P | P | P | P | 7.683227 |
| 12.82424 | 13.13972 | 12.10013   | 11.47399 P | P | P | P | 13.06922 |
| 5.138949 | 5.605325 | 6.528743   | 6.861431 M | P | P | A | 5.539215 |
| 7.315074 | 6.783565 | 7.011016   | 6.181755 A | P | P | P | 6.24918  |
|          |          | 6.604878   |            |   |   | A |          |
| 8.857497 | 9.547357 | 8.307949   | 8.412919 P | P | P | P | 9.042065 |
| 8.638575 | 8.451643 | 7.158282   | 7.017834 P | P | P | P | 8.640229 |
| 6.335943 | 6.188479 | 7.522954   | 7.469508 A | P | P | M | 6.201119 |
|          | 4.82414  | 6.403012   | 5.084121   | P | A | P |          |
|          |          | 6.921596   |            |   |   | A |          |
| 10.72081 | 10.44878 | 11.03993   | 10.88718 P | P | P | P | 10.20017 |
| 8.942946 | 9.003144 | 9.699266   | 9.143456 P | P | P | P | 8.657627 |
| 5.938855 | 6.86711  | 6.802466   | 6.99641 P  | P | P | P | 6.975631 |
| 9.701197 | 8.836435 | 10.25217   | 9.903878 P | P | P | P | 9.681536 |
| 10.64367 | 9.39262  | 10.07245   | 11.14471 P | P | P | P | 9.890698 |
| 8.718027 | 9.126411 | 8.213221   | 7.988701 P | P | P | P | 9.297792 |
| 7.533747 | 6.084066 | 6.746131   | 7.557907 A | P | A | P | 6.066573 |
| 10.38722 | 10.18007 | 9.992699   | 9.524199 P | P | P | P | 9.016709 |
| 5.37904  | 6.004855 | 7.050221   | A          | A | P |   | 4.389509 |
| 1.632129 |          | 6.821001 P |            |   |   | P | 5.713238 |
|          | 3.37211  |            |            |   | P |   |          |
|          | 3.84766  | 6.057836   |            | P | P |   |          |
| 7.21339  | 5.916738 | 7.539279   | 8.108141 P | P | A | A | 6.196214 |
| 8.584537 | 7.2593   | 8.619514   | 8.900613 P | P | A | P | 8.168951 |
| 8.284881 | 8.584778 | 9.174093   | 10.08329 P | P | P | P | 9.089277 |
| 4.918389 | 5.538789 | 5.248112   | 5.008362 A | P | P | P | 0.650788 |
|          | 5.182011 | 1.235012   | 5.187339   | A | P | P |          |
|          | 8.096136 | 8.514717   | 9.054527   | P | P | A |          |
| 7.428857 | 7.666118 | 8.203152   | 10.0108 P  | P | P | P | 8.746319 |
| 5.976895 | 6.727875 | 5.198907   | 6.775462 P | P | P | P | 6.345381 |
| 8.46005  | 8.792626 | 9.251412   | 9.064742 P | P | P | P | 9.518334 |
| 7.177924 | 5.960699 | 6.59499    | A          | P | A |   | 3.976259 |
| 10.01167 | 10.12437 | 8.710979   | 8.052838 P | P | P | P | 10.03859 |
| 6.000076 | 5.98568  | 6.083898   | 4.239224 P | A | P | P | 6.188053 |
| 6.551446 | 5.975115 | 4.697207   | A          | P | P |   | 4.582428 |
| 8.634074 | 9.356732 | 8.209287   | 7.59662 P  | P | P | P | 9.489662 |

|          |          |          |          |   |   |   |          |
|----------|----------|----------|----------|---|---|---|----------|
| 8.367884 | 7.7673   | 7.493795 | 6.752961 | P | P | P | 7.08242  |
|          |          | 0.776548 |          |   | P |   |          |
| 7.822662 | 8.125314 | 8.593737 | 9.005091 | P | P | P | 7.137819 |
| 8.732298 | 8.262698 | 9.319823 | 9.426164 | P | P | P | 8.178494 |
| 8.121675 | 8.31334  | 6.756686 | 6.371006 | P | P | P | 8.040028 |
| 7.797574 | 7.705978 | 7.779718 | 8.159861 | P | P | P | 7.367815 |
| 7.756707 | 6.799494 | 7.119843 | 6.314156 | P | P | P | 6.66813  |
| 10.17978 | 10.39454 | 11.15782 | 12.12631 | P | P | P | 11.08798 |
| 10.37449 | 10.00269 | 11.22632 | 11.70499 | P | P | P | 11.00419 |
| 7.050804 | 6.505715 | 7.677251 | 6.661629 | P | M | P | 6.447525 |
| 5.898418 | 6.387754 | 6.918307 | 6.342084 | P | P | P | 6.928258 |
| 8.037148 | 8.003561 | 7.476028 | 7.665722 | P | P | P | 7.684527 |
| 6.424764 | 5.689302 | 6.020361 | 6.670873 | P | P | A | 5.779756 |
| 10.27001 | 9.496889 | 10.54044 | 10.8787  | P | P | P | 10.34567 |
| 8.75266  | 9.012961 | 9.625403 | 8.818564 | P | P | P | 8.989641 |
| 5.569736 |          | 5.677445 | A        |   | A |   | 5.224376 |
| 3.608825 |          | 6.950457 | P        |   | P |   | 7.265093 |
| 10.12124 | 8.766272 | 7.738281 | 7.90705  | P | P | P | 4.303949 |
| 8.518311 | 8.199375 | 7.302434 | 7.035162 | P | P | P | 7.895713 |
|          |          | 7.10297  |          |   | A |   |          |
| 7.144647 | 6.81424  | 7.171113 | 7.374433 | P | P | P | 7.131413 |
| 11.64603 | 11.70117 | 12.1244  | 12.97462 | P | P | P | 11.71776 |
| 8.301471 | 7.281397 | 7.427064 | 7.816802 | P | P | P | 6.385205 |
| 5.241314 | 4.843623 |          | A        | P |   |   | 0.926344 |
| 7.307054 | 7.473165 | 5.903977 | 7.032855 | P | P | P | 7.730384 |
| 8.51183  | 8.729295 | 7.281246 | 7.307973 | P | P | P | 8.757481 |
| 7.05839  | 6.20251  | 5.935837 | 3.085713 | P | P | M | 5.535538 |
| 6.207969 | 6.477008 | 6.494535 | P        | A | P |   | 7.206368 |
| 12.74079 | 13.06411 | 12.72801 | 12.22506 | P | P | P | 12.798   |
| 11.00217 | 10.5887  | 11.64595 | 11.42555 | P | P | P | 10.70752 |
| 11.30401 | 11.08427 | 10.11742 | 9.076336 | P | P | P | 10.71687 |
| 5.945794 | 6.294037 | 6.470826 | 4.052236 | P | P | P | 5.867778 |
| 10.06912 | 9.940307 | 8.941413 | 8.934346 | P | P | P | 9.644063 |
| 9.518845 | 8.361606 | 8.983644 | 9.421428 | P | P | P | 9.023489 |
| 6.412597 | 6.395498 | 6.318144 | 8.119168 | A | P | P | 7.115533 |
| 5.708697 | 5.033781 |          | 6.431368 | M |   | P | 2.892534 |
| 10.07173 | 10.33984 | 9.244643 | 8.800499 | P | P | P | 9.647825 |
| 8.733443 | 8.248787 | 7.66586  | 8.738787 | P | P | P | 9.115919 |
| 12.05609 | 10.60435 | 11.48378 | 11.74303 | P | P | P | 10.28303 |
| 8.464069 | 8.723601 | 8.295281 | 8.215355 | P | P | P | 8.914762 |

|          |          |          |            |   |   |   |          |
|----------|----------|----------|------------|---|---|---|----------|
|          | 4.820371 |          |            | A |   |   |          |
|          |          | 5.001036 | 6.603549   |   | P | A |          |
| 11.83894 | 11.84527 | 10.96802 | 10.27933 P | P | P | P | 11.9409  |
| 9.260527 | 8.691526 | 9.591896 | 9.845593 P | P | P | P | 8.840998 |
| 6.922212 | 6.165068 | 7.348858 | 8.808129 A | P | A | A | 6.288588 |
| 11.11849 | 10.42    | 10.9052  | 11.8553 P  | P | P | P | 11.0336  |
| 9.728369 | 10.73321 | 10.47532 | 10.20846 P | P | P | P | 11.01482 |
| 9.200817 | 8.473663 | 9.758015 | 10.13187 P | P | P | P | 8.099824 |
| 6.929932 | 6.320023 | 6.037869 | 6.847146 P | P | P | M | 6.756335 |
| 7.517738 | 6.04787  | 8.70187  | 8.178358 P | P | P | P | 7.194066 |
| 11.93515 | 12.20785 | 11.08647 | 10.46775 P | P | P | P | 11.84241 |
| 11.6742  | 10.12596 | 10.81975 | 10.85292 P | P | P | P | 9.615748 |
| 6.631895 | 7.086726 | 6.763403 | 7.862618 P | P | P | A | 7.805768 |
| 6.34418  | 6.835546 | 5.834743 | 5.891024 P | P | P | P | 7.019455 |
|          | 5.960357 |          |            | P |   |   |          |
| 7.038911 | 6.365052 |          | P          | A |   |   | 6.364752 |
| 5.650808 | 6.411486 | 5.365731 | A          | A | P |   | 6.808649 |
| 7.832994 | 7.315517 | 6.334472 | 7.802435 P | P | P | P | 8.129005 |
| 7.661051 | 8.428953 | 8.247015 | 8.310067 P | P | P | P | 8.785211 |
|          | 5.419583 |          |            | A |   |   |          |
| 9.442456 | 10.04147 | 9.060319 | 8.369609 P | P | P | P | 8.963356 |
| 8.812761 | 7.471398 | 8.238781 | 9.442212 P | P | P | P | 8.08091  |
| 4.348201 |          |          | A          |   |   |   | 0.7051   |
| 7.282714 | 6.248103 | 7.014284 | 8.296609 P | P | P | P | 6.669745 |
| 9.514819 | 8.273882 | 9.584117 | 9.727463 P | P | P | P | 8.520651 |
| 12.01432 | 11.70753 | 9.580628 | 10.51172 P | P | P | P | 12.30352 |
|          |          | 4.377095 | 7.141187   |   | M | P |          |
| 9.570034 | 9.427252 | 8.768986 | 8.887636 P | P | P | P | 9.398098 |
| 6.995394 | 6.133691 | 7.900236 | 7.268312 P | P | A | P | 6.227637 |
| 10.23557 | 9.66326  | 10.82459 | 11.72114 P | P | P | P | 10.1922  |
| 9.756624 | 10.44266 | 11.02916 | 11.47271 P | P | P | P | 10.26223 |
| 8.966023 | 8.044833 | 9.524436 | 9.69913 P  | P | P | P | 9.605177 |
| 10.33523 | 9.658297 | 10.58752 | 12.72049 P | P | P | P | 10.97119 |
| 8.851131 | 7.597038 | 9.997256 | 9.326504 P | P | P | P | 7.31869  |
| 10.19174 | 10.96779 | 10.82373 | 10.60562 P | P | P | P | 10.45257 |
| 6.381469 |          |          | A          |   |   |   | 5.368074 |
|          | 6.857658 |          | 8.012195   | A |   | A |          |
| 7.787059 | 6.952335 | 7.948707 | 8.747156 P | P | A | M | 7.761547 |
| 12.14775 | 12.23848 | 11.58341 | 11.13699 P | P | P | P | 11.87005 |
| 10.34259 | 9.33609  | 10.69293 | 11.55683 P | P | P | P | 9.658448 |

|          |          |          |            |   |   |   |          |
|----------|----------|----------|------------|---|---|---|----------|
| 7.02224  | 7.023786 | 3.470063 | 6.390519 M | P | P | M | 6.455458 |
| 12.05737 | 12.04938 | 10.92133 | 10.86568 P | P | P | P | 12.27227 |
|          | 5.439896 |          | 2.742239   | P |   | M |          |
|          |          |          | 5.391724   | P |   | A |          |
| 7.589103 | 7.492457 | 8.104593 | 8.980011 P | P | P | P | 7.704795 |
| 12.07256 | 11.46748 | 11.03356 | 12.03992 P | P | P | P | 12.55106 |
| 10.94837 | 11.77613 | 11.02538 | 10.26582 P | P | P | P | 11.48821 |
| 9.259156 | 9.184436 | 9.607641 | 10.25633 P | P | P | P | 9.566563 |
| 7.782794 | 7.515241 | 7.692545 | 6.654366 P | P | P | P | 7.78364  |
| 7.669309 | 7.61487  | 6.161683 | 7.215067 P | P | P | P | 7.683817 |
|          | 4.849731 |          | 6.250783   | M |   | A |          |
| 5.649053 |          |          | 6.59606 M  |   |   | A | 5.757746 |
| 4.366462 | 5.468595 |          | P          | P |   |   | 6.309941 |
| 7.125769 |          |          | 5.046176 P |   |   | P | 6.846939 |
| 8.485753 | 9.132371 | 8.005575 | 8.187636 P | P | P | P | 9.365155 |
| 8.413721 | 9.132123 | 7.653214 | 6.929601 P | P | P | P | 8.59693  |
| 10.0019  | 9.232459 | 9.453726 | 8.45803 P  | P | P | P | 9.477593 |
| 7.779664 | 8.680561 | 9.024412 | 9.522618 P | P | P | P | 8.607503 |
| 11.47547 | 11.65928 | 11.56963 | 12.32193 P | P | P | P | 11.7732  |
| 7.130629 | 7.510336 | 7.828027 | 8.282961 P | P | P | P | 8.611496 |
| 10.34767 | 9.315417 | 10.53115 | 11.25127 P | P | P | P | 9.617118 |
| 9.73567  | 10.40278 | 11.04028 | 10.73945 P | P | P | P | 9.944543 |
| 9.599245 | 8.944634 | 8.602925 | 8.201344 P | P | P | P | 8.720249 |
| 12.3621  | 12.62776 | 13.26487 | 13.65105 P | P | P | P | 12.7687  |
| 9.545102 | 8.766248 | 9.840364 | 10.24659 P | P | P | P | 8.999028 |
| 11.17578 | 10.89326 | 9.443091 | 9.558666 P | P | P | P | 10.95983 |
| 8.258148 | 7.063245 | 7.27319  | 6.98908 P  | P | P | P | 6.638653 |
| 7.636476 | 7.176639 | 7.41964  | A          | A | A |   | 6.560171 |
|          | 5.125279 | 5.230476 |            | P | P |   |          |
| 8.021436 | 7.628754 | 7.070272 | 6.931865 P | P | P | P | 7.667635 |
| 11.62017 | 11.51163 | 11.03949 | 10.49631 P | P | P | P | 11.32339 |
| 8.17438  | 8.384541 | 8.003317 | 9.626 P    | P | P | P | 8.27695  |
| 8.205394 | 7.841579 | 8.559939 | 9.386799 P | P | P | P | 8.242875 |
| 10.07686 | 9.988009 | 9.02945  | 8.560292 P | P | P | P | 9.896744 |
| 11.95609 | 12.21462 | 11.34362 | 11.25423 P | P | P | P | 12.1329  |
| 11.14909 | 10.83243 | 10.39412 | 9.879961 P | P | P | P | 10.73892 |
| 8.562337 | 9.317967 | 8.987758 | 7.441099 P | P | P | P | 9.079604 |
| 9.366766 | 9.288239 | 8.341939 | 7.551229 P | P | P | P | 8.607632 |
| 6.331459 | 6.119473 | 6.255965 | 5.253298 A | A | P | P | 5.779648 |
| 9.622686 | 9.856847 | 11.32898 | 10.70971 P | P | P | P | 9.607261 |

|          |          |          |          |   |   |   |          |
|----------|----------|----------|----------|---|---|---|----------|
| 8.030414 | 7.101623 | 7.364648 | 7.696944 | P | P | P | 7.629851 |
| 9.60727  | 9.394399 | 8.591325 | 8.671484 | P | P | P | 9.957237 |
| 9.250833 | 8.432867 | 7.736113 | 7.674689 | P | P | P | 8.932467 |
| 12.11024 | 11.51709 | 12.92276 | 12.72926 | P | P | P | 10.97824 |
| 7.546629 | 8.777145 | 7.671646 | 7.499709 | P | P | P | 8.107291 |
| 8.043609 | 8.190632 | 8.842506 | 8.060043 | P | P | P | 8.322735 |
|          |          | 3.358153 |          |   | P |   |          |
| 6.784609 | 8.440372 | 7.058505 | 7.132079 | P | P | P | 7.990533 |
| 6.821922 | 8.172128 | 8.20926  |          | P | P |   | 7.811408 |
| 12.92226 | 12.89252 | 11.93998 | 11.8946  | P | P | P | 13.05356 |
| 6.787353 | 6.638395 | 7.821835 | 8.021865 | P | P | P | 6.517624 |
| 5.56347  | 5.23601  | 5.530442 | 5.012085 | P | P | M | 4.003083 |
| 7.700101 | 7.399357 | 7.398269 | 7.678922 | P | P | P | 7.772167 |
| 8.621744 | 8.926876 | 8.86629  | 9.841395 | P | P | P | 8.851998 |
| 9.577889 | 10.14638 | 7.609355 | 7.769355 | P | P | P | 10.16015 |
| 5.81538  | 6.817786 | 6.890095 | 3.779739 | P | P | P | 6.699762 |
| 8.246176 | 7.81056  | 7.542152 | 8.360024 | P | P | P | 7.718954 |
|          | 6.578445 | 5.631384 | 7.631873 | A | P | A |          |
|          |          |          | 5.238667 |   |   | A |          |
|          |          | 3.750689 |          |   | M |   |          |
| 6.214951 | 6.389713 | 4.52869  | A        | P | P |   | 6.24517  |
| 5.532689 | 6.339654 | 6.613529 | 6.967211 | P | P | P | 7.077497 |
|          |          | 6.677637 |          |   | A |   |          |
| 7.619973 | 7.285867 | 7.117918 | 7.469622 | P | P | P | 6.544354 |
| 11.5307  | 11.51045 | 11.69979 | 11.82312 | P | P | P | 11.24366 |
| 6.275382 | 6.067611 |          | 6.926429 | P |   | A | 5.897162 |
| 11.34283 | 9.814964 | 9.649462 | 9.817154 | P | P | P | 9.817349 |
|          |          |          | 6.296158 |   |   | A |          |
| 6.176151 | 7.405075 | 6.607759 | 7.741422 | P | P | P | 7.480026 |
| 11.08264 | 11.66666 | 10.30545 | 9.811379 | P | P | P | 11.41333 |
| 8.992952 | 6.758642 | 9.011523 | 9.068675 | P | A | A | 7.567433 |
| 8.258079 | 7.844552 | 9.251959 | 8.894074 | A | A | A | 6.882388 |
| 10.99253 | 11.16056 | 9.394974 | 10.75508 | P | P | P | 12.08925 |
| 10.6015  | 11.09058 | 9.127973 | 9.578111 | P | P | P | 11.52326 |
| 7.613387 | 6.002722 | 6.511741 | 6.23952  | P | A | P | 5.292311 |
| 7.515872 |          |          | A        |   |   |   | 2.624506 |
| 10.70801 | 10.59732 | 9.081015 | 9.224689 | P | P | P | 10.58209 |
| 6.718587 | 7.492776 | 8.350575 | 8.555437 | P | P | P | 8.35057  |
| 6.037674 | 5.981166 | 6.861038 | 7.678773 | P | P | M | 5.192917 |
|          | 5.236261 |          | 6.61328  | P |   | A |          |



|          |          |          |            |   |   |   |          |
|----------|----------|----------|------------|---|---|---|----------|
| 6.633059 | 6.488136 | 6.894831 | A          | P | P |   | 5.765376 |
| 8.068129 | 8.304332 | 7.237553 | 7.088817 A | P | P | P | 7.000508 |
| 5.807284 |          | 6.649865 | 6.813335 P |   | A | A | 6.131829 |
| 8.454577 | 9.305233 | 8.610651 | 8.469002 P | P | P | P | 8.917776 |
| 10.88874 | 9.745355 | 11.44171 | 10.91433 P | P | P | P | 9.424948 |
| 7.754827 |          | 8.375739 | 9.79835 A  |   | A | P | 7.697031 |
|          | 6.790082 | 5.424309 |            | P | P |   |          |
| 11.79873 | 11.69712 | 11.02278 | 10.52751 P | P | P | P | 11.41574 |
| 10.7574  | 10.48144 | 9.751183 | 10.36564 P | P | P | P | 10.71009 |
| 5.6962   | 5.874712 | 5.365073 | 2.683735 P | M | P | P | 5.874526 |
| 6.746588 | 7.09927  | 6.678764 | P          | P | P |   | 6.451763 |
| 8.834215 | 8.716875 | 8.643283 | 7.776187 P | P | P | P | 8.162355 |
|          |          |          | 7.112629   |   |   | A |          |
|          |          | 3.343143 |            |   | P |   |          |
| 9.775443 | 8.274024 | 8.912407 | 8.453523 P | P | P | P | 8.336082 |
| 4.971999 | 5.328054 |          | 5.932978 A | P |   | M | 2.291528 |
| 7.125626 | 7.952216 | 7.430627 | P          | P | P |   | 7.275329 |
| 8.608628 | 9.566756 | 8.643386 | 7.35579 P  | P | P | P | 9.641504 |
| 6.656064 | 7.136263 | 6.440537 | 5.574702 P | P | P | P | 5.61047  |
| 10.92729 | 10.61012 | 10.47335 | 9.721344 P | P | P | P | 10.32678 |
| 9.556021 | 9.414948 | 9.059028 | 9.784287 P | P | P | P | 9.771526 |
| 7.54944  | 7.800097 | 8.28698  | 7.203382 P | P | P | P | 7.18317  |
|          | 5.849852 | 4.542325 |            | A | P |   |          |
|          |          |          | 5.824525   |   |   | P |          |
| 9.139464 | 8.881699 | 8.654909 | 8.106895 P | P | P | P | 8.124801 |
| 6.828319 | 6.206454 | 5.921    | 6.795253 P | P | P | M | 5.688987 |
| 5.548449 | 6.077085 | 6.004745 | 6.129693 P | P | P | M | 6.500537 |
| 5.592727 | 6.837347 | 2.086129 | 1.572299 P | P | P | P | 6.304004 |
| 10.2072  | 10.12731 | 9.22806  | 8.556538 P | P | P | P | 9.489539 |
| 9.563033 | 11.05243 | 6.658711 | 10.02571 P | P | P | P | 8.530006 |
| 7.503891 | 7.341948 | 7.099183 | 6.695023 P | P | P | P | 6.770645 |
| 8.618006 | 8.670924 | 7.972635 | 8.76981 P  | P | P | P | 9.028933 |
|          | 5.552195 |          |            | A |   |   |          |
| 9.735725 | 9.815835 | 9.363806 | 10.41963 P | P | P | P | 8.515232 |
| 12.27818 | 11.85991 | 11.10574 | 11.57462 P | P | P | P | 11.98911 |
| 5.627458 |          | 7.460284 | 7.402931 P |   | P | P | 7.289369 |
| 7.210992 | 7.263547 | 6.831783 | 3.783818 A | P | P | P | 7.24924  |
| 10.22038 | 10.75076 | 9.758138 | 9.816984 P | P | P | P | 10.29069 |
|          |          | 2.104448 |            |   | P |   |          |
| 7.484682 | 6.750462 |          | 5.579566 A | P |   | M | 6.796465 |

|          |          |          |          |   |   |   |          |
|----------|----------|----------|----------|---|---|---|----------|
| 7.632543 | 8.058501 | 7.23867  | 7.108798 | P | P | P | 7.886435 |
| 9.125304 | 9.88058  | 9.725148 | 9.270227 | P | P | P | 10.22979 |
| 6.508874 |          | 6.214076 | 7.682221 |   | A | P | 6.500233 |
| 11.00596 | 11.06216 | 10.06376 | 10.10859 | P | P | P | 11.0986  |
| 13.00941 | 13.10399 | 13.26165 | 13.40965 | P | P | P | 14.06015 |
| 10.52137 | 9.674987 | 10.2694  | 9.683849 | P | P | P | 10.09939 |
| 4.119364 | 5.817938 | 6.803615 | P        | A | P |   | 6.595531 |
|          |          | 6.615964 |          |   |   | A |          |
|          |          | 5.962456 |          |   | A |   |          |
| 5.592342 | 7.078189 | 7.365248 | 8.444053 | P | P | P | 6.829249 |
| 11.0747  | 10.54887 | 11.58013 | 12.02931 | P | P | P | 11.08628 |
| 9.56591  | 9.648899 | 10.25743 | 10.33896 | P | P | P | 9.670547 |
|          | 6.513089 | 5.659296 | 7.736023 | P | P | A |          |
| 7.589414 | 8.434874 | 8.044291 | 9.149936 | P | P | P | 8.802618 |
| 8.458522 | 9.387887 | 8.078199 | 8.171078 | P | P | P | 8.741336 |
|          |          | 1.518542 | 3.607887 |   | P | M |          |
| 10.31827 | 10.3005  | 9.274391 | 8.423461 | P | P | P | 9.654726 |
| 11.24325 | 11.77636 | 13.01681 | 12.05075 | P | P | P | 10.41363 |
| 6.585287 | 6.269266 | 6.235553 | 7.164835 | P | P | A | 6.196593 |
| 11.915   | 11.44274 | 10.77732 | 10.33825 | P | P | P | 11.10299 |
| 9.096053 | 8.121478 | 7.270577 | 7.389676 | P | P | P | 7.335074 |
| 8.6297   | 7.873636 | 5.899207 | 6.727319 | P | P | P | 5.401887 |
| 8.390958 | 7.567624 | 7.786817 | 7.182833 | P | P | P | 7.682768 |
| 9.085097 | 8.843164 | 8.358592 | 8.098079 | P | P | P | 8.526668 |
| 6.619658 | 6.389972 | 4.435845 | 6.596334 | P | P | P | 5.709321 |
| 7.36311  | 7.010871 | 8.18567  | A        | M | A |   | 6.329943 |
| 8.726096 | 8.536032 | 6.3537   | 6.593645 | P | P | P | 8.524932 |
| 7.069237 | 6.233656 | 6.704177 | 6.34005  | A | A | P | 6.528062 |
| 10.16691 | 9.930985 | 9.489564 | 8.676236 | P | P | P | 9.689004 |
| 7.088888 | 6.886628 | 7.638076 | 8.421506 | A | P | P | 8.124921 |
| 5.338776 |          |          | A        |   |   |   | 4.099029 |
| 7.97594  | 6.33196  | 7.81217  | 8.18127  | P | P | P | 6.884852 |
| 7.325966 | 6.265294 | 5.512317 | 5.033322 | P | P | P | 5.650181 |
| 6.338644 | 5.53799  | 6.421439 | 7.417396 | A | P | A | 7.433932 |
| 6.708883 | 6.368344 | 6.644115 | 7.296096 | P | P | P | 7.732947 |
| 12.52287 | 11.43098 | 12.56643 | 12.58378 | P | P | P | 10.62335 |
| 6.465497 | 5.737599 | 6.872769 | 7.090435 | P | A | M | 7.254194 |
| 5.468017 | 3.726276 |          | P        | P |   |   | 6.12964  |
| 5.59565  | 6.241036 | 6.571822 | 5.919273 | A | P | P | 6.42955  |
| 8.247657 | 8.439977 | 7.571994 | 8.253793 | P | P | P | 8.357561 |

|          |          |          |            |   |   |   |          |
|----------|----------|----------|------------|---|---|---|----------|
| 9.269989 | 9.626043 | 10.20173 | 9.512308 P | P | P | P | 9.217443 |
| 7.914711 | 8.170134 | 7.690664 | 7.195906 P | P | P | P | 7.83211  |
|          |          |          | 6.650997   |   |   | A |          |
| 7.0282   | 7.134339 | 7.40965  | 8.385157 P | P | P | P | 6.839901 |
| 7.223118 | 6.629326 | 7.860484 | A          | A | A |   | 5.255946 |
| 9.115414 | 8.487249 | 7.472402 | 7.614857 P | P | P | P | 9.0008   |
| 10.29972 | 10.14798 | 10.08294 | 9.42848 P  | P | P | P | 10.06692 |
| 9.213967 | 9.235072 | 9.631496 | 10.16534 P | P | P | P | 9.24911  |
| 13.99899 | 14.72095 | 13.57986 | 13.55682 P | P | P | P | 14.89728 |
|          |          | 6.844575 | 5.537282   |   | P | P |          |
| 5.48359  | 6.900046 | 8.019525 | 8.404246 P | A | A | A | 5.692366 |
| 8.199716 | 7.922761 | 9.457799 | 9.964198 P | P | P | P | 8.169292 |
| 12.07301 | 11.57381 | 11.90179 | 11.77213 P | P | P | P | 11.31637 |
| 8.488034 | 8.208423 | 8.77295  | 8.795727 P | P | P | P | 7.780737 |
|          | 6.12485  | 7.617496 |            | A | P |   |          |
| 7.254223 |          |          | A          |   |   |   | 6.064676 |
| 8.315343 | 6.888893 | 8.374619 | 8.461659 P | P | P | P | 7.287563 |
| 9.483219 | 8.090573 | 8.983298 | 8.130815 P | P | P | P | 7.876239 |
|          |          | 3.800458 |            |   | P |   |          |
| 6.925198 | 5.960577 | 7.211873 | 7.333303 P | A | P | P | 6.761929 |
| 7.213757 | 6.471885 | 8.381247 | 8.986139 A | P | P | P | 5.437913 |
| 5.927625 |          |          | 6.813826 A |   |   | A | 6.000294 |
| 6.920677 | 8.107737 | 7.369006 | 6.969946 P | P | P | P | 7.930205 |
| 9.081432 | 9.10431  | 8.509607 | 9.112706 P | P | P | P | 9.333777 |
| 6.817837 | 8.945295 | 8.828466 | 9.135462 P | P | P | P | 8.269804 |
| 5.917692 | 5.844812 | 7.452861 | A          | A | A |   | 5.104622 |
| 5.952527 |          | 4.866822 | A          |   | M |   | 5.458339 |
| 7.57509  | 7.677307 | 9.066041 | A          | A | P |   | 7.087045 |
|          |          | 6.574527 |            |   | A |   |          |
| 1.392896 |          | 5.877965 | 6.53756 P  |   | P | M | 6.874145 |
|          |          |          | 6.800043   |   |   | A |          |
|          |          | 6.095684 |            |   | A |   |          |
| 9.160189 | 10.08705 | 8.682813 | 8.158683 P | P | P | P | 8.078274 |
|          | 2.826034 |          |            | P |   |   |          |
| 11.25001 | 12.02277 | 10.37624 | 11.62665 P | P | P | P | 12.5937  |
| 6.080338 | 6.444056 |          | 2.994062 P | P |   | P | 7.33192  |
| 6.095472 |          | 6.528716 | 8.04493 P  |   | A | A | 7.712048 |
| 8.182791 | 8.356774 | 9.15528  | 8.057037 P | P | P | P | 7.624718 |
| 6.687746 | 7.693519 | 7.602884 | 7.574588 P | P | A | P | 6.801227 |
| 8.089067 | 8.621568 | 8.705003 | 7.231777 P | M | P | P | 7.067577 |

|          |          |          |          |   |   |   |          |
|----------|----------|----------|----------|---|---|---|----------|
| 9.839561 | 8.810774 | 9.706209 | 9.448225 | P | P | P | 8.830815 |
| 6.589249 |          | 7.597841 | 7.47123  |   | A | P | 8.705962 |
|          |          |          | 5.818903 |   |   | A |          |
|          | 6.952116 |          | 6.812387 | A |   | P |          |
| 5.555014 | 6.079083 | 5.397032 | P        | P | P |   | 6.674806 |
|          |          | 6.388547 |          |   | P |   |          |
| 6.548288 | 7.449902 | 6.503053 | 6.802182 | A | P | P | 6.888857 |
| 9.183036 | 9.321808 | 9.203191 | 7.702017 | P | P | P | 8.892462 |
| 5.098794 |          | 5.827757 | A        |   | A |   | 1.410299 |
| 12.56793 | 10.7143  | 12.2163  | 11.7606  | P | P | P | 9.286922 |
| 9.149943 | 9.622582 | 9.081485 | 8.231395 | P | P | P | 9.002851 |
| 10.15142 | 10.44159 | 9.758302 | 9.656806 | P | P | P | 10.20638 |
| 8.913118 | 9.239495 | 9.797446 | 9.190473 | P | P | P | 8.959301 |
| 5.175305 | 6.829479 |          | P        | A |   |   | 5.663069 |
| 10.01961 | 9.662297 | 10.56545 | 9.888917 | P | P | P | 10.42691 |
|          | 5.634206 |          |          | A |   |   |          |
| 7.396406 | 5.680178 | 6.706191 | 6.806413 | A | P | P | 6.324715 |
| 8.464336 | 6.724302 | 8.140731 | 7.593312 | A | A | A | 6.154848 |
| 8.165296 | 8.715744 | 7.642394 | 6.301077 | P | P | P | 8.558359 |
| 6.439227 | 5.866602 | 7.202814 | A        | A | A |   | 6.013752 |
| 8.660941 | 8.511269 | 9.268634 | 8.650109 | P | P | P | 7.89359  |
| 6.387939 | 6.974837 | 5.761564 | 8.508562 | P | P | P | 7.689965 |
| 5.218173 | 4.355855 |          | A        | P |   |   | 1.152885 |
| 6.118832 |          | 3.904864 | A        |   | P |   | 6.169576 |
| 6.939551 |          | 6.876693 | 5.823798 |   | P | P | 7.190851 |
| 7.230009 | 8.00421  | 6.752042 | M        | P | P |   | 7.4143   |
| 6.75729  | 6.609053 | 6.879773 | 7.975341 | P | P | P | 7.37646  |
| 7.414599 |          | 7.147938 | 7.567497 |   | A | A | 5.686131 |
|          | 3.493221 |          |          | P |   |   |          |
| 8.703393 | 9.122137 | 9.754385 | 9.858184 | P | P | P | 8.683958 |
|          | 5.846041 | 5.629891 | 3.739352 | P | P | P |          |
| 6.326555 | 7.259708 | 7.947347 | 7.849089 | P | P | P | 6.706183 |
|          |          |          | 6.717889 |   |   | A |          |
| 10.16326 | 9.971012 | 10.32717 | 9.349065 | P | P | P | 9.008303 |
| 10.28022 | 9.770588 | 10.82766 | 11.42878 | P | P | P | 10.22724 |
| 10.31156 | 10.10542 | 11.52898 | 12.02106 | P | P | P | 10.41663 |
|          |          |          | 8.301421 |   |   | A |          |
| 5.552789 | 6.847824 | 5.319918 | 6.71182  | P | P | A | 6.486587 |
| 8.765506 | 9.730252 | 8.014605 | 7.960988 | P | P | P | 9.108786 |
| 8.09678  | 8.018973 | 8.913638 | 9.599182 | P | P | P | 8.383616 |

|          |          |          |            |   |   |   |          |
|----------|----------|----------|------------|---|---|---|----------|
|          | 6.066912 | 6.222204 | 5.090562   | P | A | P |          |
| 6.310904 |          | 0.560884 | M          |   | P |   | 5.349726 |
| 9.012845 | 7.615298 | 7.922702 | 7.230711 P | P | P | P | 7.603983 |
| 5.084361 | 4.996419 | 1.281735 | M          | M | P |   | 5.925723 |
| 6.276583 | 6.662156 | 3.426643 | 6.353127 A | P | P | A | 6.261152 |
| 9.349177 | 10.44977 | 9.153283 | 8.734586 P | P | P | P | 10.27771 |
| 7.704908 | 7.729919 | 7.755952 | 8.454469 P | P | P | P | 7.939293 |
| 6.293239 | 6.658867 | 6.343251 | 6.341466 P | P | P | P | 6.015146 |
| 6.296329 | 5.641649 |          | 2.15885 A  | A |   | M | 5.580442 |
| 6.606904 |          | 7.036265 | 6.77315 A  |   | P | A | 6.201315 |
| 6.650835 | 4.030897 | 6.801516 | 6.740324 P | P | P | A | 6.080856 |
| 7.731863 | 7.78095  | 7.726985 | 7.948306 P | P | P | P | 7.981182 |
|          | 5.618817 |          |            | A |   |   |          |
| 5.918092 |          |          | 6.783257 A |   |   | P | 5.330664 |
| 6.936258 | 7.001985 | 6.190524 | 7.503962 P | P | P | A | 7.804221 |
| 9.602637 | 9.524576 | 9.257907 | 10.67347 P | P | P | P | 10.12489 |
|          | 6.661604 | 5.223289 |            | A | P |   |          |
| 5.879854 | 5.482936 | 6.194238 | P          | P | A |   | 5.605439 |
| 7.516555 |          | 8.210126 | A          |   | A |   | 5.882097 |
| 6.437516 | 6.360634 | 7.372518 | 6.549307 P | P | P | P | 6.787314 |
|          |          | 1.853126 |            |   | P |   |          |
| 10.98727 | 11.66388 | 11.37938 | 12.07398 P | P | P | P | 12.00058 |
| 8.108656 | 8.157614 | 7.93664  | 6.8362 P   | P | P | P | 8.278044 |
| 7.608943 | 7.723848 | 8.625984 | 9.437973 A | P | A | A | 7.856789 |
| 6.917206 | 6.634546 | 6.464291 | 6.602738 P | P | P | A | 7.209879 |
| 5.587929 | 6.306317 | 6.284385 | 5.633192 P | A | A | P | 6.551292 |
| 3.817817 |          |          | P          |   |   |   | 5.223457 |
| 5.747757 | 5.62733  |          | 5.014247 P | A |   | P | 5.990842 |
| 10.48206 | 10.30983 | 9.373043 | 9.329424 P | P | P | P | 10.36551 |
| 7.968298 | 6.942932 | 7.562914 | 7.712662 A | P | P | P | 6.130362 |
| 8.903154 | 9.429944 | 8.646318 | 8.327415 P | P | P | P | 8.680409 |
| 5.126222 | 2.806612 | 5.642799 | A          | P | P |   | 5.612092 |
|          |          | 7.372222 |            |   | A |   |          |
| 7.799286 | 7.223115 | 10.34339 | 9.748024 A | P | P | P | 6.767601 |
| 7.933736 | 7.801756 | 7.989338 | A          | P | P |   | 5.430888 |
| 5.123807 |          |          | 6.18319 A  |   |   | A | 4.01643  |
| 6.417756 | 6.543647 | 7.150502 | 5.061212 P | P | P | P | 6.340726 |
| 9.335188 | 9.797571 | 10.44777 | 9.98499 P  | P | P | P | 9.72274  |
| 7.732523 | 7.776042 | 7.522031 | 7.179813 P | P | P | P | 8.23318  |
| 5.601806 | 6.620871 | 5.76432  | P          | P | P |   | 6.156179 |

|          |          |          |            |   |   |   |          |
|----------|----------|----------|------------|---|---|---|----------|
| 5.553924 | 2.35129  |          | A          | P |   |   | 5.562351 |
|          |          |          | 2.569392   |   |   | P |          |
| 8.364944 | 9.107249 | 9.680513 | 9.900723 P | P | P | P | 8.766552 |
| 6.211813 | 7.655254 | 7.576059 | P          | P | P |   | 8.001224 |
| 5.861985 | 5.452198 | 6.444243 | 5.565142 A | P | P | P | 5.620751 |
|          | 5.092643 |          | 6.316051   | P |   | A |          |
| 7.557265 | 7.334154 | 6.733838 | A          | P | P |   | 6.512009 |
|          | 6.194316 | 5.026576 | 4.682597   | A | P | P |          |
| 13.1239  | 11.86094 | 12.72465 | 11.97828 P | P | P | P | 11.05706 |
| 8.261084 | 8.957626 | 8.368966 | 7.63084 P  | P | P | P | 8.459774 |
| 8.440885 | 7.575082 | 7.923028 | 7.772721 A | P | P | A | 6.995845 |
| 4.893977 | 6.005037 | 7.134329 | 7.599373 A | A | P | P | 6.732976 |
| 8.675545 | 7.724337 | 7.55954  | 5.920601 P | P | P | P | 6.792305 |
| 6.003156 |          | 3.389909 | P          |   | P |   | 6.271578 |
| 6.435756 | 7.709903 | 7.585022 | 7.455162 P | P | P | P | 7.735652 |
| 7.126137 | 7.328878 | 7.331403 | P          | P | P |   | 5.833122 |
|          | 6.184751 |          |            | A |   |   |          |
|          |          | 6.178623 | 7.844262   |   | A | A |          |
| 5.953464 | 5.714888 | 6.325391 | A          | A | P |   | 4.961958 |
| 9.078218 | 8.785515 | 7.447491 | 8.28709 P  | P | P | P | 8.701818 |
| 8.640718 | 8.235903 | 7.803888 | 7.233357 P | P | P | P | 6.874138 |
|          |          |          | 4.869599   |   |   | P |          |
|          | 2.951003 |          |            | P |   |   |          |
| 7.035499 | 7.152316 |          | 4.721809 A | A |   | P | 6.556428 |
|          |          | 5.79775  |            |   | M |   |          |
| 9.457078 | 10.01915 | 9.450523 | 9.558028 P | P | P | P | 9.661747 |
| 6.168044 | 6.125193 | 6.87924  | 8.185958 P | P | P | P | 7.711624 |
| 4.776164 |          |          | A          |   |   |   | 5.874315 |
| 1.452493 |          |          | M          |   |   |   | 6.136436 |
| 5.75759  | 5.839429 | 5.377512 | 4.916139 A | P | P | P | 2.640165 |
| 6.219974 | 5.954862 | 6.063262 | A          | A | P |   | 3.119304 |
| 7.085225 | 7.395606 | 8.23042  | 7.530017 P | P | P | P | 7.05175  |
| 6.719097 | 5.687731 |          | A          | A |   |   | 4.592503 |
|          | 5.459208 | 6.049122 | 7.069372   | P | A | P |          |
|          |          | 1.110024 |            |   | M |   |          |
|          |          | 4.881601 |            |   | M |   |          |
| 6.774791 | 6.093278 | 5.158001 | 7.023538 P | P | P | A | 5.875938 |
| 5.916011 | 5.748928 | 6.125445 | 4.427753 P | P | A | P | 6.804731 |
| 7.489369 | 8.150085 | 7.710926 | 8.026585 P | P | P | P | 7.500953 |
| 7.225436 | 6.889827 | 8.81243  | 8.505299 P | P | P | A | 7.177276 |

|          |          |          |          |   |   |   |   |          |
|----------|----------|----------|----------|---|---|---|---|----------|
| 5.702646 | 5.567225 | 5.916275 | 3.43497  | A | A | A | P | 5.59474  |
| 6.05118  | 6.799717 | 4.048626 |          | A | P | P |   | 5.108507 |
| 6.63001  |          | 6.95712  | 5.695149 | P |   | P | P | 6.89512  |
| 8.488765 | 8.647862 | 8.398305 | 7.404953 | P | P | P | P | 8.242674 |
| 6.801523 | 6.46585  | 2.407359 | 7.353947 | P | P | P | A | 6.081877 |
| 8.142328 | 7.931395 | 6.790454 | 6.013004 | P | P | P | P | 7.701082 |
| 7.503866 | 7.164852 | 6.198253 | 1.159822 | P | P | P | P | 7.142708 |
| 10.03829 | 10.50071 | 9.956659 | 8.787702 | P | P | P | P | 10.24063 |
| 6.891685 | 7.437595 |          | 8.16682  | P | A |   | P | 6.602082 |
|          |          |          | 2.600582 |   |   |   | P |          |
| 5.511256 |          | 6.794981 |          | P |   | A |   | 6.880716 |
| 8.575264 | 8.513818 | 9.522261 | 9.532539 | P | P | P | P | 8.408663 |
|          |          | 5.302534 |          |   |   | P |   |          |
| 6.805491 | 7.135819 | 6.784737 | 6.874076 | A | P | P | P | 5.763474 |
| 9.26356  | 10.52327 | 8.89955  | 8.102695 | P | P | P | P | 9.892846 |
| 6.753753 | 7.262576 | 5.679877 |          | P | P | P |   | 6.412104 |
|          | 5.529759 | 6.572321 |          | P | M |   |   |          |
|          | 7.013893 |          | 3.310394 | A |   |   | M |          |
| 4.279501 |          |          |          | A |   |   |   | 2.041947 |
| 5.953939 | 6.24209  | 5.786038 | 4.249808 | P | P | P | P | 6.007055 |
| 7.566471 | 7.294277 | 6.551019 | 6.645002 | P | P | P | P | 7.481422 |
| 5.187597 | 3.892958 | 5.872318 | 5.393407 | P | P | P | P | 6.320601 |
| 7.22416  | 7.489896 | 7.014472 | 6.546447 | P | P | P | P | 7.30825  |
| 9.36933  | 9.66837  | 8.810577 | 8.002914 | P | P | P | P | 9.174543 |
| 8.451446 | 8.505224 | 7.512356 | 6.606127 | P | P | P | P | 7.417118 |
| 5.312454 |          | 0.727457 |          | P |   | P |   | 6.3562   |
|          |          | 4.626729 |          |   |   | P |   |          |
| 5.301027 | 6.519326 | 6.822448 | 7.360149 | M | M | P | A | 6.529856 |
| 11.94235 | 12.02027 | 11.05214 | 10.8378  | P | P | P | P | 11.73057 |
|          |          | 2.791561 |          |   |   | P |   |          |
|          | 3.160157 | 3.765225 |          | P | P | P |   |          |
| 5.639054 | 3.564173 | 3.843657 | 6.035763 | P | P | P | P | 6.446147 |
| 7.791514 | 8.062259 | 6.848324 | 6.905996 | P | P | P | P | 7.681259 |
| 8.702163 | 8.491659 | 7.378284 | 6.581322 | P | P | P | P | 8.55015  |
| 11.03965 | 10.75337 | 9.927599 | 10.11708 | P | P | P | P | 10.95978 |
| 7.300191 | 7.503659 | 6.418644 | 6.327857 | P | P | P | P | 6.076701 |
|          |          |          |          | P |   |   |   |          |
|          | 5.342492 |          | 3.546498 | P |   |   | M |          |
| 11.40623 | 11.47935 | 10.51827 | 9.732451 | P | P | P | P | 10.89016 |
| 5.477121 | 6.105809 | 6.02542  | 4.561238 | P | A | P | P | 5.933904 |

|          |          |          |          |   |   |   |   |          |
|----------|----------|----------|----------|---|---|---|---|----------|
| 5.140651 | 5.763488 | 6.038875 |          | P | P | P |   | 6.155856 |
| 10.12876 | 10.86128 | 13.03569 | 13.10217 | P | P | P | P | 10.56227 |
| 9.357099 | 9.36595  | 8.818961 | 7.738807 | P | P | P | P | 8.79328  |
| 6.439776 | 3.453465 | 5.598912 | 6.367103 | P | P | P | P | 6.906683 |
|          |          | 1.577931 |          |   |   | P |   |          |
| 5.69801  | 5.207188 | 6.786207 | 6.405268 | A | P | P | A | 4.566034 |
| 4.75903  | 5.035494 |          | 6.927415 | P |   |   | P | 6.188169 |
| 7.972076 | 7.356633 | 7.736803 | 8.728968 | P |   | A | A | 7.155791 |
| 7.038804 | 7.107896 | 6.460185 | 7.036492 | A | P | P | M | 6.360892 |
| 6.454999 | 6.002082 | 6.312141 | 6.5217   | P | P | P | P | 5.813242 |
| 6.787798 | 7.235715 | 6.50056  | 5.473465 | P | P | P | P | 6.616286 |
| 3.885824 | 5.656664 |          | 7.256003 | P |   |   | A | 6.329985 |
|          | 6.103798 | 5.837179 |          | A | P |   |   |          |
| 6.763949 | 6.516178 | 7.124942 | 7.435843 | P | A |   | P | 6.700221 |
| 7.151213 | 7.154117 | 7.329656 | 6.082795 | P | P |   | P | 7.077048 |
|          |          | 4.881684 |          |   |   | M |   |          |
|          | 5.060051 |          |          | A |   |   |   |          |
| 7.067756 | 7.095783 | 6.130819 | 7.178508 | P | P | P | P | 7.754791 |
| 6.332482 | 7.121996 | 6.55472  | 3.236212 | P | P | P | P | 6.043913 |
| 6.068764 |          | 5.738068 | 4.865417 | A |   | M | P | 5.291247 |
| 8.413223 | 8.52457  | 9.554414 | 10.23188 | P | P | P | P | 8.954085 |
| 5.792319 | 6.997064 | 6.352437 | 6.984431 | P | P | P | P | 6.002605 |
| 7.536419 | 6.069011 | 6.68902  | 6.842739 | P | P | P | A | 6.882129 |
| 8.034395 | 8.933927 | 7.544143 | 7.098959 | P | P | P | P | 7.891841 |
|          | 6.905934 | 5.668378 | 2.885839 | P | P | P | M |          |
| 6.283594 | 5.762135 | 5.995043 | 7.145403 | M | P | P | A | 6.054933 |
| 5.915247 |          |          |          | A |   |   |   | 4.709376 |
|          |          | 6.46253  | 7.16557  |   |   | P | A |          |
| 6.797209 | 6.549152 | 6.918516 |          | A | A |   |   | 5.681745 |
|          | 6.66574  |          |          | P |   |   |   |          |
| 6.164362 | 6.457254 | 6.276025 | 2.880861 | A | P | P | P | 6.402965 |
| 9.128005 | 8.942656 | 8.902649 | 7.672732 | P | P | P | P | 8.283414 |
| 4.337011 |          | 6.073121 |          | P |   | A |   | 6.115723 |
| 8.137969 | 8.786894 | 8.421135 | 7.097805 | P | P | P | P | 8.640397 |
| 8.230928 | 9.010077 | 8.635957 | 7.064322 | P | P | P | P | 8.403746 |
|          |          |          | 7.139087 |   |   |   | P |          |
| 6.627001 | 6.468887 | 6.391293 | 6.516473 | P | P | P | M | 6.509126 |
| 9.824545 | 9.820259 | 8.70369  | 8.661716 | P | P | P | P | 9.105355 |
| 6.238215 | 6.785424 | 6.955085 | 7.359218 | P | P | P | A | 7.106104 |
| 8.313296 | 6.15826  | 7.008876 | 8.151483 | A | P | P | A | 5.915655 |



|          |          |          |            |   |   |   |          |
|----------|----------|----------|------------|---|---|---|----------|
|          | 4.594809 |          | 6.535718   | P |   | A |          |
| 5.228065 |          | 2.324876 | A          |   | P |   | 5.125232 |
| 2.166312 | 6.222325 |          | P          | A |   |   | 5.497696 |
|          |          |          | 6.964799   |   |   | A |          |
| 8.193334 | 8.004452 | 7.196865 | 7.884074 P | P | P | P | 8.078978 |
| 8.182573 | 8.490999 | 6.575571 | 7.531105 P | P | P | P | 7.241005 |
| 5.903342 | 6.028613 | 5.485076 | 2.873653 A | P | P | M | 1.287506 |
| 5.385995 | 5.646086 | 4.67479  | P          | A | M |   | 6.570532 |
| 9.821298 | 10.52537 | 9.74871  | 9.405603 P | P | P | P | 10.17135 |
| 7.0076   | 7.484576 | 6.848379 | A          | P | P |   | 6.34628  |
|          |          | 5.915664 | 6.340567   |   | A | A |          |
|          | 6.378577 |          |            | A |   |   |          |
|          | 7.301009 | 3.361167 |            | A | M |   |          |
| 6.885031 | 7.283408 | 8.206751 | 4.33692 A  | P | P | P | 6.873143 |
| 8.026316 | 8.981109 | 7.797715 | 7.630808 P | P | P | P | 8.296948 |
| 5.707425 | 6.213853 | 5.953251 | M          | P | P |   | 7.454145 |
| 5.849348 | 5.991524 | 2.895905 | P          | P | P |   | 6.296557 |
| 4.168245 |          | 4.769392 | P          |   | P |   | 5.309764 |
|          |          | 6.730184 |            |   | A |   |          |
|          |          | 4.381478 |            |   | P |   |          |
| 9.242327 | 8.936557 | 8.710137 | 8.015054 P | P | P | P | 9.081883 |
|          |          |          | 6.772005   |   |   | A |          |
| 7.704766 | 8.365076 | 7.256974 | 6.077745 P | P | P | P | 8.093434 |
| 8.879681 | 8.733171 | 8.929611 | 7.105938 P | P | P | P | 7.560209 |
|          |          | 4.856309 |            |   | P |   |          |
| 9.51322  | 9.983729 | 9.933858 | 8.099791 P | P | P | P | 10.22669 |
| 6.972742 | 7.179376 | 7.281861 | 7.423787 P | P | P | P | 8.056062 |
| 8.123729 | 7.642619 | 7.833097 | 6.144602 P | P | P | P | 7.676273 |
| 6.236367 | 7.116926 | 6.968288 | 6.409818 P | M | P | P | 6.702405 |
|          |          |          | 4.076009   |   |   | P |          |
|          | 5.839911 | 7.026041 | 6.844796   | A | P | A |          |
|          | 5.979784 | 4.768426 | 5.399381   | A | P | P |          |
| 7.437573 | 6.099925 | 7.18845  | 6.822179 A | A | P | P | 6.131876 |
|          | 7.330947 |          |            | A |   |   |          |
| 7.013787 | 6.012884 | 6.637481 | 5.63336 A  | P | P | P | 4.87842  |
| 6.919983 | 7.032857 | 6.702805 | 8.601016 P | P | P | P | 8.004969 |
| 7.07944  | 6.469966 | 5.920986 | 6.490998 A | P | P | P | 4.841103 |
| 7.262458 | 6.874613 | 6.022838 | 6.809912 P | P | P | P | 6.234501 |
| 4.626146 | 5.173657 | 5.245777 | P          | P | P |   | 5.976356 |
| 8.406357 | 8.277775 | 7.346032 | 7.425241 P | P | P | P | 7.269355 |

|          |          |          |          |   |   |   |          |
|----------|----------|----------|----------|---|---|---|----------|
| 6.615144 | 7.002275 | 6.915096 | 6.67587  | P | P | P | 6.746324 |
| 6.275171 | 6.225317 | 3.950438 | A        | P | P |   | 4.72844  |
| 8.629282 | 8.402288 | 8.649512 | 9.474021 | P | P | P | 8.620316 |
| 5.150644 |          | 5.976321 | 7.497132 | A | A | M | 5.830876 |
| 6.797257 | 6.005297 | 6.406339 | A        | A | P |   | 6.134079 |
| 7.168684 | 7.711282 | 6.979769 | A        | P | P |   | 7.064951 |
| 8.098982 | 8.460885 | 7.483062 | 7.566016 | P | P | P | 8.379232 |
| 6.858865 | 6.356151 | 6.409626 | 6.295611 | P | P | P | 4.836639 |
|          |          | 5.671311 | 6.684977 |   | P | P |          |
| 10.47616 | 7.830088 | 9.638201 | 8.581265 | A | P | P | 6.312769 |
| 5.702575 |          |          | A        |   |   |   | 3.781589 |
| 10.49014 | 11.26691 | 10.02137 | 8.507923 | P | P | P | 10.75477 |
| 5.721425 | 6.77727  | 6.651896 | 5.333779 | M | P | M | 7.618949 |
| 5.886322 | 4.529688 | 6.36735  | 5.938471 | P | P | A | 5.744965 |
| 6.955154 | 6.956487 | 6.845054 | 6.938006 | P | P | A | 5.872513 |
| 6.458725 | 6.584048 | 5.868535 | 7.169076 | P | P | P | 6.317409 |
| 7.19008  | 7.374719 | 6.45067  | 7.531277 | P | P | P | 7.252149 |
| 6.840708 | 7.718095 | 6.645562 | 5.596157 | P | P | P | 6.988528 |
| 5.96153  | 5.838455 | 1.899954 | A        | A | P |   | 5.098326 |
| 6.877112 | 7.526606 | 7.263137 | 8.642032 | P | P | P | 6.922283 |
| 9.365141 | 9.647826 | 10.06982 | 8.698278 | P | P | P | 8.653495 |
| 6.014818 | 5.645839 | 6.683589 | 7.40582  | A | A | A | 3.59523  |
| 9.272265 | 9.402708 | 9.159482 | 8.371826 | P | P | P | 8.209052 |
|          |          | 5.776417 | 6.370075 |   | P | A |          |
| 5.824934 | 6.008201 | 7.286516 | P        | P | A |   | 6.586757 |
| 7.285673 | 7.663093 | 7.000985 | 5.398447 | P | P | P | 7.732503 |
| 6.961067 | 7.938016 | 7.457317 | 5.326768 | P | P | P | 7.129476 |
| 9.078326 | 9.432993 | 8.61853  | 8.215611 | P | P | P | 8.320502 |
| 6.870073 | 6.572216 | 6.663905 | 7.66314  | A | A | M | 7.056146 |
| 4.864561 |          | 3.961605 | P        |   | P |   | 6.328641 |
| 7.281534 | 6.06615  | 7.430632 | 7.821225 | M | P | P | 7.51926  |
| 11.06911 | 11.18154 | 10.51582 | 9.911597 | P | P | P | 11.01036 |
| 6.043666 |          | 6.188763 | A        |   | A |   | 4.547317 |
| 7.887408 |          |          | A        |   |   |   | 5.645381 |
|          |          | 6.886544 |          |   |   | A |          |
| 8.195415 | 8.790147 | 7.798769 | 7.56967  | P | P | P | 7.964935 |
| 8.872932 | 9.960215 | 9.050882 | 8.238732 | P | P | P | 9.001521 |
| 5.677359 | 6.455626 | 5.773846 | 3.689808 | P | P | P | 6.062545 |
| 6.457862 |          | 5.872287 | 4.81302  |   | A | P | 5.025027 |
| 6.215547 | 6.018172 | 7.253943 | 7.786242 | P | P | P | 6.827726 |

|          |          |          |          |   |   |   |          |
|----------|----------|----------|----------|---|---|---|----------|
| 8.001371 | 6.453582 | 6.776732 | 5.700644 | P | P | P | 6.221917 |
| 5.848805 | 5.82305  | 5.909446 | 6.980919 | P | A | A | 6.610225 |
| 6.121221 | 4.861049 | 5.559405 | P        | P | P |   | 6.050308 |
| 6.156234 |          |          | 3.828399 |   |   | P | 6.620164 |
|          | 5.91045  |          | 4.139009 | A |   | P |          |
| 5.383514 |          | 5.200186 | 7.134724 |   | P | P | 6.690594 |
| 8.796299 | 8.731844 | 7.777299 | 7.625135 | P | P | P | 8.353284 |
| 10.73338 | 11.33024 | 12.11752 | 11.84742 | P | P | P | 10.8425  |
| 7.610399 | 6.887202 | 5.751499 | 6.870931 | P | P | P | 6.12321  |
|          |          | 7.369235 |          |   | A |   |          |
|          |          |          | 2.904803 |   |   | P |          |
| 9.35272  | 8.248874 | 9.279638 | 9.957548 | P | P | P | 8.175395 |
| 7.404007 | 6.861546 | 5.750095 | 6.587569 | P | P | P | 6.704357 |
| 9.098847 | 9.523297 | 9.277908 | 8.53341  | P | P | P | 9.401512 |
| 4.933964 | 5.072113 | 5.204944 | 6.171357 | A | P | A | 4.12718  |
| 7.050571 | 6.754504 | 7.955597 | 7.41607  | P | P | P | 5.818945 |
|          |          | 4.999019 |          |   | P |   |          |
|          |          | 5.41664  |          |   | P |   |          |
| 6.061859 | 5.396723 |          | A        | P |   |   | 4.145145 |
| 8.24317  | 7.757235 | 8.059253 | 8.39781  | P | P | P | 8.136221 |
| 7.415133 |          |          | 8.250356 |   |   | A | 8.52647  |
| 6.434959 | 5.728882 | 5.942257 | 6.058718 | P | P | A | 4.90528  |
|          | 5.715549 |          |          | A |   |   |          |
| 7.731273 | 8.885216 | 8.162116 | 5.632363 | P | P | P | 7.794057 |
| 3.443432 |          |          | P        |   |   |   | 4.858321 |
|          | 5.610824 | 5.628801 | 6.544069 | A | P | P |          |
| 7.045414 | 6.333126 | 5.780834 | 6.537415 | P | P | P | 5.492681 |
|          |          |          | 4.775832 |   |   | P |          |
| 4.458282 |          | 5.627472 | 6.331645 |   | P | A | 5.701684 |
| 9.562466 | 9.406026 | 9.018616 | 8.061138 | P | P | P | 8.959846 |
| 7.264703 | 5.545136 | 7.60443  | 7.85392  | P | P | P | 6.975752 |
| 7.576253 | 7.036428 | 7.279662 | 6.793453 | P | P | P | 6.014644 |
| 9.513968 | 9.016246 | 8.295269 | 8.395516 | P | P | P | 8.003281 |
| 1.086494 | 5.541477 |          | P        | P |   |   | 6.009702 |
| 6.715089 | 6.387308 | 7.08447  | 7.964107 | P | P | A | 6.127088 |
| 8.330923 | 8.682908 | 8.558739 | 8.237463 | P | P | P | 7.488026 |
| 8.665028 | 7.704244 | 8.79785  | 7.055692 | P | P | P | 7.637018 |
| 7.737328 | 7.042041 | 7.303179 | 7.575018 | P | P | P | 6.568487 |
| 6.083706 | 5.562692 | 6.50681  | 6.733429 | P | A | P | 5.049823 |
| 5.631445 |          | 4.317084 | A        |   | P |   | 5.867017 |

|          |          |          |          |   |   |   |   |          |
|----------|----------|----------|----------|---|---|---|---|----------|
| 7.13993  | 6.897847 | 6.359549 |          | A | A | M |   | 6.070569 |
| 9.652064 | 9.607566 | 10.03139 | 10.88686 | P | P | P | P | 9.981684 |
| 8.425343 | 7.94662  | 7.607203 | 7.011608 | P | P | P | P | 7.654289 |
| 8.1934   | 7.25158  | 7.089984 | 7.122844 | P | P | P | P | 6.282343 |
| 6.342091 | 7.151756 | 4.372726 |          | P | P | P |   | 7.501474 |
| 6.92722  | 6.961536 | 7.27204  | 3.847282 | P | P | P | P | 7.131338 |
|          | 5.059654 |          |          | A |   |   |   |          |
| 8.780073 | 9.103313 | 8.069213 | 7.249778 | P | P | P | P | 8.399261 |
| 6.392914 | 6.082433 | 6.500999 | 7.412043 | A | A | P | M | 6.460041 |
| 4.917321 | 5.481975 |          |          | P |   |   |   | 6.139928 |
| 5.665821 |          | 5.95892  | 6.379    | A |   | P | P | 3.304439 |
| 8.089524 | 6.772304 | 7.242344 |          | P | P | P |   | 7.017934 |
|          | 5.261765 |          |          | A |   |   |   |          |
| 6.972878 | 6.466038 | 5.879369 | 1.93084  | M | P | P | P | 5.767576 |
|          |          | 2.588669 |          |   | P |   |   |          |
| 6.009899 | 6.693195 | 3.807564 |          | A | M | P |   | 6.457051 |
| 5.989652 |          |          |          | A |   |   |   | 4.590389 |
| 5.916249 |          |          |          | A |   |   |   | 4.025716 |
| 5.611534 |          |          |          | A |   |   |   | 3.915315 |
| 6.869364 | 6.682388 | 4.279147 | 7.533195 | A | P | P | P | 6.440419 |
| 5.141873 |          |          |          | A |   |   |   | 2.296447 |
| 6.181566 | 5.048814 |          | 6.750431 | A | M |   | A | 6.159534 |
| 6.000132 | 5.838668 |          |          | A | A |   |   | 4.531781 |
| 8.003963 | 7.87459  | 7.530263 | 8.234191 | P | P | P | P | 8.161694 |
|          |          | 6.023749 |          |   |   | A |   |          |
|          |          | 4.204077 | 5.27225  |   |   | P | P |          |
|          |          | 5.201734 |          |   |   | P |   |          |
| 5.350278 | 4.959199 |          |          | A | P |   |   | 0.435498 |
| 5.987711 | 5.62216  | 6.252351 |          | M | A | P |   | 6.455149 |
| 6.086182 | 5.90226  | 6.184368 | 7.072295 | P | P | P | A | 6.885484 |
| 6.536012 | 6.969921 | 6.963919 | 7.738009 | P | P | P | P | 6.75735  |
| 5.186875 |          |          |          | A |   |   |   | 2.854164 |
|          |          | 7.61317  |          |   |   | A |   |          |
| 8.875985 | 10.27433 | 8.818335 | 8.579709 | P | P | P | P | 10.05857 |
| 10.30057 | 9.165631 | 9.587407 | 8.696136 | P | P | P | P | 8.423676 |
| 7.061315 | 7.359358 | 7.800498 | 7.348529 | A | P | A | P | 6.716709 |
| 7.131551 | 6.681307 | 7.30726  | 5.640169 | P | P | P | P | 5.742096 |
| 10.45926 | 10.11972 | 10.18672 | 9.76204  | P | P | P | P | 10.77646 |
| 7.05713  | 6.366345 |          |          | M | A |   |   | 6.674559 |
| 6.81656  | 6.762961 | 7.216871 | 6.422168 | P | A | P | P | 6.362166 |

|          |          |          |          |   |   |   |   |          |
|----------|----------|----------|----------|---|---|---|---|----------|
| 6.795343 | 7.526694 | 6.732083 |          | P | P | P |   | 6.470677 |
| 6.27951  | 5.019519 | 6.398037 | 7.132493 | P | P | A | P | 6.076554 |
| 4.263495 | 5.455822 | 3.828888 |          | A | P | P |   | 4.581279 |
| 6.722635 | 6.402065 | 6.105183 | 6.327793 | A | P | A | P | 5.271232 |
| 9.320102 | 9.186036 | 9.642775 | 8.721538 | P | P | P | P | 8.68256  |
| 10.21908 | 9.27758  | 10.42349 | 10.14554 | P | P | P | P | 8.86496  |
| 9.192077 | 8.862262 | 8.588906 | 8.415679 | P | P | P | P | 8.753753 |
|          |          |          | 2.18569  |   |   |   | P |          |
| 11.40776 | 11.11005 | 9.13295  | 8.576118 | P | P | P | P | 10.93288 |
| 4.315347 |          | 3.076844 |          | A |   | P |   | 5.325694 |
| 6.006332 | 6.831916 | 6.54069  | 6.977471 | P | P | P | A | 6.65315  |
| 8.939748 | 8.114166 | 9.508744 | 9.8159   | P | P | P | P | 8.122776 |
| 8.606652 | 8.299993 | 9.630048 | 9.234581 | P | P | P | P | 7.756252 |
| 10.39547 | 10.79006 | 10.1362  | 9.771235 | P | P | P | P | 10.93114 |
| 4.131875 | 4.520602 |          |          | P | M |   |   | 5.25767  |
| 9.582558 | 9.953278 | 9.527432 | 8.659655 | P | P | P | P | 9.314946 |
| 7.522709 | 7.252875 | 7.617766 | 7.610125 | P | P | P | P | 7.733978 |
| 8.26109  | 8.583962 | 8.95996  | 10.79746 | P | P | P | P | 9.680036 |
| 8.780244 | 9.297229 | 9.059889 | 7.828836 | P | P | P | P | 8.904617 |
| 6.730984 | 5.968055 | 6.461012 | 5.543728 | A | P | P | P | 5.389693 |
| 9.148374 | 8.554821 | 9.23478  | 10.37588 | P | P | P | P | 8.900924 |
| 6.670633 | 6.795241 | 6.732937 | 5.805816 | A | P | P | P | 5.546485 |
| 6.123027 | 5.102361 | 6.013488 |          | A | P | P |   | 3.32812  |
| 7.351147 | 7.21713  | 8.042242 | 8.651163 | P | A | P | P | 7.735965 |
| 9.320476 | 9.703538 | 9.373239 | 9.269603 | P | P | P | P | 9.538979 |
| 6.699804 | 6.523656 | 5.398539 | 6.315616 | P | P | P | A | 6.465935 |
|          | 4.400569 | 4.820221 | 2.218061 |   | P | P | P |          |
| 5.613163 | 6.273164 | 6.954747 | 7.428368 | P | P | P | P | 6.764781 |
| 5.505799 | 6.052801 | 5.382789 |          | P | P | P |   | 6.423806 |
|          | 6.050698 | 6.117319 | 2.556433 |   | A | P | P |          |
| 7.422768 | 6.902267 | 6.342536 | 7.71205  | P | P | P | P | 8.064446 |
|          | 5.072677 | 5.987168 |          | P | P | P |   |          |
| 6.401245 |          |          | 7.573856 | P |   |   | A | 6.789383 |
|          | 5.731311 |          |          | A |   |   |   |          |
| 5.725886 | 4.644809 | 5.945711 | 6.50737  | A | A | M | A | 5.768423 |
|          |          | 5.29153  |          | P | P | M |   |          |
| 5.978206 | 6.042014 | 7.063835 | 6.168992 | P | P | P | P | 6.255105 |
| 10.05896 | 10.16498 | 9.460115 | 9.323219 | P | P | P | P | 10.68233 |
|          | 4.258524 | 5.865953 | 3.829131 | P | P | A | P |          |
| 10.14539 | 9.946314 | 10.70921 | 10.68262 | P | P | P | P | 10.35581 |

|          |          |          |          |   |   |   |          |
|----------|----------|----------|----------|---|---|---|----------|
| 10.26504 | 11.08892 | 10.64642 | 11.19151 | P | P | P | 11.30003 |
| 6.787689 | 7.118782 | 5.530344 | 5.763957 | P | P | P | 6.53122  |
| 8.144281 | 8.674005 | 9.652801 | 9.509965 | P | P | P | 7.970652 |
| 8.295181 | 9.885431 | 8.773289 | 7.53075  | P | P | P | 9.293816 |
| 5.032369 |          |          | A        |   |   |   | 2.685065 |
| 8.895156 | 9.63077  | 8.016647 | 8.480132 | P | P | P | 9.492174 |
| 7.948269 | 8.386002 | 7.683108 | 5.953377 | P | P | P | 8.410673 |
|          |          | 6.217607 |          |   | P |   |          |
| 6.053365 | 4.958664 |          | A        | P |   |   | 1.309054 |
|          |          | 2.593934 |          |   | P |   |          |
| 5.882422 | 4.479909 | 6.297469 | 7.250363 | M | P | A | 5.39183  |
| 7.432343 | 7.074808 | 8.068711 | 8.025072 | P | P | P | 7.001269 |
|          | 6.399001 | 6.638768 |          | A | A |   |          |
| 11.562   | 12.25107 | 10.3232  | 10.83831 | P | P | P | 12.23728 |
| 5.118933 | 6.869974 | 5.456874 | 3.964091 | P | P | P | 6.770386 |
| 7.302234 | 8.38216  | 8.116821 | 7.386015 | P | P | P | 8.057185 |
|          |          | 6.88938  |          |   |   | M |          |
| 6.909622 | 6.341487 | 6.306494 | 7.091387 | A | P | P | 6.989958 |
| 8.179529 | 8.659059 | 7.992641 | 7.423095 | P | P | P | 7.888775 |
| 10.52385 | 9.278548 | 10.18185 | 10.61084 | P | P | P | 9.577639 |
| 7.102288 | 6.8965   |          | 7.360355 | P |   | P | 6.958828 |
| 7.95009  | 7.956121 | 7.293086 | 5.445976 | P | P | P | 8.041798 |
| 8.989144 | 9.138066 | 8.188492 | 7.35747  | P | P | P | 8.499136 |
| 8.012066 | 8.67239  | 7.77421  | 6.524745 | P | P | P | 7.675084 |
| 7.945081 | 8.28393  | 7.968038 | 6.612698 | P | P | P | 8.173698 |
|          | 0.807411 |          |          | P |   |   |          |
| 6.784472 | 6.834585 | 5.846896 | 7.541467 | P | P | M | 7.094374 |
| 7.176722 | 6.729771 | 7.02093  | 6.309587 | P | P | A | 4.15683  |
| 9.267218 | 8.544722 | 8.595544 | 8.712319 | P | P | P | 9.293025 |
|          |          | 6.259011 |          |   |   | A |          |
| 7.42418  | 7.360306 | 7.901754 | 8.497515 | M | A | A | 7.308881 |
| 6.35419  | 6.6201   | 6.523964 | 5.300562 | P | P | P | 7.07337  |
|          | 5.55986  | 6.62873  |          | P | P |   |          |
| 7.45361  | 7.678038 | 5.66914  | A        | M | M |   | 7.035904 |
| 8.228371 | 7.010779 | 7.529195 | 7.336159 | P | P | P | 7.126483 |
| 11.31049 | 10.74735 | 10.8681  | 10.37862 | P | P | P | 10.85172 |
| 8.905036 | 8.501487 | 8.328436 | 7.804848 | P | P | P | 8.157058 |
| 9.351368 | 8.993878 | 7.34382  | 7.843143 | P | P | P | 8.158262 |
| 7.169437 | 8.313992 | 7.682919 | 7.785467 | P | P | P | 8.164357 |
|          |          | 1.974515 |          |   |   | P |          |

|          |          |          |          |   |   |   |   |          |
|----------|----------|----------|----------|---|---|---|---|----------|
| 5.515492 |          |          |          | A |   |   |   | 4.039988 |
| 7.055998 | 5.930529 | 7.352799 | 5.751996 | A | P | A | P | 6.26078  |
| 7.41148  | 7.802912 | 6.05899  | 6.380803 | P | P | P | P | 7.316638 |
|          | 4.968359 |          | 6.76005  |   | P |   | P |          |
| 6.855125 | 7.591197 | 7.288245 | 5.63037  | P | P | P | P | 6.767838 |
| 6.043609 | 6.283514 | 7.254428 | 7.191325 | M | P | P | A | 6.469946 |
| 7.245234 | 7.578312 | 5.748591 | 7.146312 | M | P | P | P | 7.878034 |
| 6.727518 | 6.818488 | 6.077979 | 7.775103 | P | P | P | P | 6.576121 |
|          | 5.460477 |          |          |   | A |   |   |          |
| 5.17836  | 5.624288 | 5.131739 | 2.425737 | A | P | P | P | 4.703975 |
| 7.8841   | 8.378872 | 8.805256 | 7.943493 | P | P | P | P | 7.777223 |
| 6.003795 | 5.315117 | 3.846984 |          | A | P | P |   | 5.331971 |
|          | 5.009823 | 4.870233 |          |   | A | P |   |          |
| 4.427304 |          |          |          | P |   |   |   | 6.561392 |
| 6.104476 | 6.484389 | 6.164597 | 7.444305 | P | P | P | P | 6.92433  |
| 4.910794 |          | 4.302648 |          | A |   | P |   | 2.895059 |
| 7.420629 |          | 7.600023 | 7.701455 | P |   | P | A | 6.876709 |
| 7.546999 | 7.996222 | 6.840045 | 6.360191 | P | P | P | P | 7.793294 |
| 6.452552 | 6.157273 | 7.481232 | 6.522053 | A | P | P | P | 6.242661 |
|          | 6.117401 |          |          |   | A |   |   |          |
| 6.901737 | 6.737225 | 5.193258 | 4.905025 | A | P | P | P | 6.70158  |
|          | 4.291925 |          |          |   | P |   |   |          |
| 4.628135 |          |          |          | P |   |   |   | 5.645459 |
| 3.869888 |          |          |          | P |   |   |   | 5.829263 |
| 5.392313 | 5.746891 |          |          | A | A |   |   | 6.301203 |
|          |          | 5.739921 |          |   |   | P |   |          |
| 8.008913 | 7.465733 | 8.491303 | 8.83641  | P | M | A | A | 6.816916 |
| 5.08016  |          | 6.47885  | 6.736999 | P |   | P | A | 6.425908 |
| 10.42588 | 9.011601 | 9.350074 | 8.645913 | P | P | P | P | 9.027262 |
| 9.932814 | 9.257705 | 10.22515 | 10.10903 | P | P | P | P | 10.50793 |
| 8.536924 | 8.181191 | 8.454517 | 6.151427 | P | P | P | P | 8.406455 |
| 5.443858 | 4.229567 | 4.964358 | 6.731967 | P | P | P | P | 6.87715  |
| 5.236101 | 5.520808 |          |          | P | P |   |   | 6.440168 |
|          |          |          | 7.281313 |   |   |   | A |          |
| 7.614906 | 8.017011 | 7.096714 | 7.547585 | P | P | P | P | 7.65709  |
| 4.789994 | 6.71772  | 6.645953 |          | P | A | P |   | 6.25156  |
| 8.732803 | 9.019533 | 8.738916 | 7.979932 | P | P | P | P | 8.991677 |
| 5.655113 | 6.779159 | 6.638342 |          | P | P | P |   | 7.010027 |
|          | 6.342742 | 1.576216 |          |   | P | P |   |          |
| 12.33589 | 12.28189 | 10.44863 | 10.60922 | P | P | P | P | 12.64327 |

|          |          |          |          |   |   |   |          |
|----------|----------|----------|----------|---|---|---|----------|
| 8.876073 | 9.176546 | 7.055955 | 6.660946 | P | P | P | 8.426929 |
| 6.212354 | 6.641838 | 6.229637 | A        | P | P |   | 6.296483 |
| 8.653082 | 9.115322 | 7.914197 | 7.732484 | P | P | P | 8.61888  |
| 8.541039 | 9.095333 | 7.482298 | 6.119409 | P | P | P | 8.246436 |
| 7.903452 | 8.687415 | 8.134188 | 7.065376 | P | P | P | 8.444107 |
| 7.913092 | 8.846716 | 7.62228  | 7.379355 | P | P | P | 8.233479 |
| 11.49393 | 12.24287 | 12.50985 | 13.07511 | P | P | P | 12.61659 |
|          | 6.021612 | 4.682025 | 3.168814 | A | P | P |          |
| 12.45459 | 12.31839 | 11.81991 | 11.35171 | P | P | P | 11.94233 |
| 10.14862 | 9.69049  | 9.12012  | 9.34263  | P | P | P | 8.677045 |
| 7.280592 | 7.200151 | 7.297527 | 7.501711 | A | P | A | 6.467048 |
| 3.628938 |          | 2.760061 | P        |   | P |   | 5.386668 |
| 6.764838 | 7.50944  | 6.076187 | 6.770648 | P | P | P | 7.237063 |
| 7.254964 | 7.021141 | 6.907637 | 7.270438 | P | P | M | 8.266322 |
|          | 5.046085 | 6.22569  |          | A | A |   |          |
|          |          | 6.862482 | 7.009223 |   | M | A |          |
| 9.340874 | 9.101038 | 8.365212 | 7.931436 | P | P | P | 8.077254 |
|          |          | 7.481746 |          |   | A |   |          |
| 4.225338 | 5.946869 | 5.771841 | 5.405231 | P | P | P | 6.820126 |
| 6.702643 | 6.712404 | 3.938146 | 3.968204 | P | P | P | 6.688627 |
| 10.11127 | 9.403152 | 8.205751 | 9.416572 | P | P | P | 10.23604 |
| 8.31343  | 8.209391 | 9.618491 | 11.22211 | P | P | P | 9.14935  |
| 7.079065 | 6.751266 | 7.630246 | 8.466425 | P | P | P | 7.512496 |
| 6.379469 |          |          | 3.290909 | A |   | P | 2.540227 |
| 6.218131 | 6.309019 | 4.798105 | 6.00294  | P | P | P | 5.603772 |
|          | 5.313329 | 6.198293 | 6.975721 | P | A | A |          |
| 9.235189 | 8.548062 | 9.96806  | 9.482765 | P | P | P | 7.919576 |
|          | 5.381754 |          | 7.428498 | A |   | A |          |
|          | 4.510186 |          |          | P |   |   |          |
| 7.274742 |          | 8.317661 | 9.440598 |   | A | P | 7.911547 |
| 7.665364 | 7.64304  | 6.406403 | 6.978151 | P | P | M | 7.729177 |
| 6.674694 | 6.292964 |          | A        | A |   |   | 4.362761 |
|          | 6.067933 |          |          | A |   |   |          |
| 3.409513 | 6.634953 | 4.701528 | P        | P | P |   | 6.407915 |
| 7.327842 | 7.26399  | 7.289992 | 6.887594 | P | P | P | 8.235278 |
| 9.981607 | 10.33025 | 10.35042 | 9.621367 | P | P | P | 9.833831 |
| 7.219852 | 6.669741 | 6.693439 | 7.175063 | P | P | A | 6.29857  |
| 7.149833 |          |          | 8.267288 | A |   | A | 7.07057  |
| 8.319484 | 6.417366 | 7.250875 | 7.191476 | P | P | P | 7.316565 |
|          | 5.170816 | 4.562769 |          | M | P |   |          |



|          |          |          |          |   |   |   |   |          |
|----------|----------|----------|----------|---|---|---|---|----------|
| 7.395346 | 5.895605 | 6.583335 | 7.135361 | P | A | P | P | 6.625216 |
| 6.662203 | 6.137947 | 6.436899 | 5.337876 | P | P | P | P | 6.980619 |
| 4.362443 | 3.320965 |          |          | P |   |   |   | 5.406731 |
| 7.275898 | 7.642947 | 6.988604 | 5.766964 | P | P | P | P | 6.940517 |
|          | 4.667334 | 4.516377 |          | P | P |   |   |          |
| 5.80727  | 6.589065 | 5.787575 | 6.965948 | P | P | P | P | 6.950116 |
|          | 1.580675 |          |          | P |   |   |   |          |
| 4.805131 |          | 4.817911 | 6.409495 | A |   | P | A | 2.609706 |
| 1.747809 | 6.360589 | 5.995246 | 6.412616 | P | P | P | P | 6.163068 |
| 4.941577 | 6.010584 | 5.559177 |          | P | M |   |   | 6.465087 |
| 7.118427 | 7.471659 | 7.885306 | 7.563973 | P | P | P | P | 7.253891 |
|          | 5.388643 | 7.430863 |          | P | P |   |   |          |
| 6.420898 | 6.935911 | 5.96546  | 6.978488 | P | P | P | P | 6.152711 |
| 6.11454  |          | 6.605272 | A        |   | A |   |   | 3.84509  |
| 6.209393 | 6.847572 | 7.299832 | A        | P | A |   |   | 4.265271 |
| 8.858049 | 8.585974 | 7.636577 | 7.455511 | P | P | P | P | 10.24065 |
| 7.535472 | 7.264247 | 7.069869 | 7.742684 | P | P | A |   | 7.055989 |
| 6.426301 | 5.919718 | 7.562793 | 6.403392 | P | P | P | P | 5.937256 |
| 8.772959 | 8.388231 | 7.692329 | 8.776717 | P | P | P | P | 8.753127 |
| 7.934228 | 8.273322 | 7.486399 | 6.806047 | P | P | P | P | 8.15043  |
| 6.854717 | 6.680652 | 6.614432 | 6.544583 | P | P | A |   | 5.737814 |
| 4.598634 | 5.649274 | 5.354973 | 3.802246 | P | P | P | P | 5.209579 |
| 8.035721 | 8.555659 | 6.212145 | 7.151763 | P | P | P | P | 7.629876 |
| 5.699901 |          |          | P        |   |   |   |   | 6.823268 |
| 8.175011 | 8.206314 | 8.281721 | 7.7973   | P | P | P | P | 8.426212 |
| 8.381455 | 8.564589 | 8.026785 | 7.812165 | P | P | P | P | 8.321501 |
| 13.14776 | 13.53689 | 13.6462  | 13.53641 | P | P | P | P | 13.19324 |
| 6.691087 | 6.244735 | 5.567033 | 7.121646 | P | P | A |   | 6.40764  |
|          |          |          | 2.969538 |   |   | M |   |          |
| 7.619284 | 7.230793 | 7.200385 | 7.117719 | P | P | P | P | 7.312677 |
| 7.142841 | 6.860006 | 7.064941 | 5.739104 | P | P | P | P | 6.711442 |
| 10.22608 | 9.881189 | 9.268357 | 8.769035 | P | P | P | P | 9.339962 |
| 6.355956 | 4.01344  |          | 7.926395 | P |   | A |   | 7.471685 |
| 8.72414  | 8.847577 | 7.955871 | 6.605562 | P | P | P | P | 8.555244 |
| 9.009116 | 9.664775 | 8.571651 | 7.334346 | P | P | P | P | 9.189667 |
| 5.687408 |          | 5.985859 | 7.454128 | P |   | P | P | 6.658876 |
| 9.821369 | 8.855916 | 9.416523 | 9.046118 | P | P | P | P | 8.297619 |
| 7.63626  | 7.886084 | 7.486366 | 6.137996 | P | P | P | P | 7.833127 |
| 7.687031 |          |          | A        |   |   |   |   | 6.091812 |
| 11.17037 | 11.12018 | 11.8197  | 13.26795 | P | P | P | P | 12.02829 |

|          |          |          |          |   |   |   |          |
|----------|----------|----------|----------|---|---|---|----------|
| 7.338301 | 7.892717 | 7.043737 | 4.412427 | P | P | P | 6.949226 |
| 7.239795 | 7.635539 | 6.302483 | A        | P | P |   | 6.82005  |
| 7.406164 | 7.904898 | 7.020484 | 6.355695 | P | P | P | 6.7843   |
| 6.563135 | 6.142461 | 7.262802 | 4.102149 | P | P | P | 6.344237 |
| 4.084685 |          |          | P        |   |   |   | 7.500293 |
| 8.401148 | 9.324561 | 8.228115 | 7.916936 | P | P | P | 8.792411 |
| 7.957932 | 7.300394 | 8.825361 | 9.500777 | P | P | P | 8.496603 |
|          |          |          | 8.079737 |   |   | A |          |
| 9.761122 | 9.240581 | 8.282084 | 7.872325 | P | P | P | 8.980576 |
|          | 5.764678 | 7.341699 |          | P | P |   |          |
|          |          | 2.056669 |          |   | P |   |          |
|          |          | 4.516455 |          |   | M |   |          |
| 9.765472 | 8.741713 | 8.707272 | 9.292578 | P | P | P | 8.48654  |
|          |          | 6.856054 |          |   | A |   |          |
| 5.974953 | 6.321457 | 5.984691 | 2.298656 | P | P | P | 4.880281 |
|          | 6.845522 | 2.975962 | 3.953571 | P | P | P |          |
| 7.528387 | 7.69459  | 8.144901 | 8.787572 | P | P | P | 7.792248 |
| 9.86829  | 10.11465 | 10.98221 | 10.86044 | P | P | P | 9.632584 |
|          |          | 5.200025 |          |   | P |   |          |
| 7.609743 | 7.588269 | 6.444791 | 5.759243 | P | P | P | 7.350221 |
| 7.528785 | 7.6235   | 6.775513 | 7.634081 | P | P | P | 7.69849  |
| 6.562794 |          | 6.141554 | 7.585755 |   | P | A | 6.602219 |
| 9.473661 | 9.360914 | 8.612895 | 8.43711  | P | P | P | 9.034355 |
| 6.262183 | 6.160736 | 6.822925 | 6.416324 | P | P | P | 5.212891 |
| 9.904282 | 10.29567 | 10.71326 | 11.5496  | P | P | P | 10.20956 |
| 7.969473 | 9.639937 | 8.008631 | 5.201472 | P | P | P | 8.788681 |
| 10.86927 | 11.82073 | 10.21128 | 9.263876 | P | P | P | 11.36618 |
| 8.458412 | 8.399661 | 7.541787 | 6.927041 | P | P | P | 7.8374   |
| 6.693564 | 5.982754 | 5.109084 | A        | P | P |   | 6.225612 |
|          | 6.284912 |          |          | P |   |   |          |
| 7.565351 | 9.063821 | 8.435782 | 6.656673 | P | P | P | 8.57466  |
|          | 2.847885 |          |          | P |   |   |          |
| 5.310899 |          |          | A        |   |   |   | 0.906302 |
| 8.398682 | 7.711525 | 8.097863 | 7.61754  | P | P | A | 6.730808 |
| 9.713591 | 10.58592 | 11.01536 | 10.03043 | P | P | P | 10.45302 |
|          | 5.801543 |          |          | A |   |   |          |
| 7.585188 | 7.974925 | 7.18063  | 6.439536 | P | P | P | 7.124966 |
| 0.291342 |          |          | P        |   |   |   | 6.205288 |
| 5.737556 | 4.989779 | 4.600503 | 5.000711 | P | P | P | 6.321967 |
|          |          |          | 6.635068 |   |   | A |          |

|          |          |          |            |   |   |   |   |          |
|----------|----------|----------|------------|---|---|---|---|----------|
|          |          |          | 5.797777   |   |   |   | A |          |
| 10.6759  | 10.37585 | 10.61352 | 9.936648 P | P | P | P |   | 10.65409 |
| 6.678721 | 8.022317 | 7.876877 | 6.366146 P | P | P | P |   | 7.686481 |
|          | 6.795932 | 3.740295 |            | P | P |   |   |          |
| 11.91031 | 11.7603  | 12.42486 | 13.77417 P | P | P | P |   | 12.61324 |
|          | 6.266674 | 8.106417 |            | A | A |   |   |          |
| 4.877481 | 4.785363 | 6.093146 | 6.669968 P | P | P | A |   | 5.395957 |
| 7.24926  | 7.870519 | 6.072711 | 6.457419 P | P | P | P |   | 8.079872 |
|          | 7.215045 | 6.88975  | 5.469739   | P | A | P |   |          |
| 8.537783 | 8.387845 | 8.757022 | 6.944152 P | P | P | P |   | 7.502937 |
| 5.118673 |          | 5.699987 | 6.604633 A |   | A | P |   | 5.40388  |
| 7.665612 | 8.320173 | 7.131276 | 6.561862 P | P | P | P |   | 7.506152 |
|          |          | 4.746341 |            |   | A |   |   |          |
|          |          |          | 1.457973   |   |   | M |   |          |
| 7.531806 | 7.461778 | 7.143098 | 7.09998 P  | P | P | P |   | 6.020709 |
| 8.498565 | 7.516854 | 7.854725 | 7.734228 P | P | P | P |   | 7.281995 |
| 7.389539 | 8.308859 | 7.246481 | 6.74622 P  | P | P | P |   | 7.292356 |
| 1.328546 | 5.737846 |          | P          | A |   |   |   | 5.674806 |
|          | 5.378758 | 5.36389  | 3.756203   | P | P | P |   |          |
|          |          | 4.999253 |            |   | P |   |   |          |
| 9.091655 | 8.738814 | 8.016546 | 6.759129 P | P | P | P |   | 8.515914 |
| 7.43924  | 6.832909 | 3.910433 | 6.087097 P | P | P | P |   | 7.866608 |
|          |          | 5.807201 | 1.099556   |   | A | P |   |          |
| 7.057571 | 7.382057 | 8.251427 | 6.130244 A | M | P | A |   | 6.923656 |
|          | 5.346543 |          |            | A |   |   |   |          |
| 5.746535 | 7.084692 | 5.428352 | P          | P | P |   |   | 6.306865 |
| 6.687387 | 7.868781 | 7.985981 | 8.483491 P | P | P | P |   | 7.91409  |
| 6.931102 |          |          | A          |   |   |   |   | 5.865862 |
| 5.387804 | 5.921115 | 4.962184 | M          | A | P |   |   | 4.769214 |
| 7.592441 | 8.102307 | 7.345906 | 6.496319 P | P | P | P |   | 8.209395 |
| 5.103663 | 6.657108 | 6.002443 | P          | P | P |   |   | 6.755133 |
| 6.816488 | 7.348022 | 7.937419 | 7.441138 P | P | P | A |   | 7.297836 |
| 8.008328 | 7.650174 | 8.521854 | 7.255096 P | P | P | P |   | 6.642406 |
| 11.41351 | 11.50094 | 10.77175 | 9.999213 P | P | P | P |   | 10.53513 |
| 5.467726 | 4.653861 | 4.937951 | P          | P | P |   |   | 6.080778 |
| 9.912169 | 10.29181 | 10.3858  | 9.069118 P | P | P | P |   | 10.11706 |
| 7.134217 | 7.149984 | 7.987758 | 8.1094 P   | P | P | P |   | 7.433502 |
| 7.564214 | 6.942093 | 6.465275 | 5.639969 A | P | P | P |   | 6.436072 |
| 6.806703 | 6.124803 | 5.779952 | 6.304834 P | P | P | P |   | 6.688956 |
|          | 2.293018 |          |            | P |   |   |   |          |

|          |          |          |            |   |   |   |          |
|----------|----------|----------|------------|---|---|---|----------|
| 4.851868 |          |          | A          |   |   |   | 0.038664 |
| 5.519792 |          | 6.177927 | 6.805716 P |   | A | A | 5.536007 |
| 10.58364 | 10.74409 | 9.897913 | 8.999549 P | P | P | P | 10.43235 |
| 6.244927 | 6.195481 | 7.136499 | A          | P | M |   | 6.907936 |
| 6.014525 | 5.343001 |          | 5.613189 A | A |   | M | 5.670404 |
| 5.603527 |          | 4.860279 | A          |   | P |   | 6.534309 |
|          | 5.707658 | 4.25796  | 6.525881   | P | P | A |          |
| 6.67402  | 7.677799 | 7.453096 | 4.846593 P | P | P | P | 7.013971 |
| 7.087407 | 6.556169 | 6.037957 | M          | P | P |   | 6.825418 |
| 7.582361 | 6.88449  | 6.242553 | 2.713012 A | P | P | M | 5.515741 |
|          |          | 5.6871   |            |   | A |   |          |
| 8.095434 | 7.864507 | 7.41562  | 6.601199 P | P | P | P | 7.574583 |
| 2.328919 | 4.781436 |          | 6.132419 M | P |   | A | 5.52526  |
| 5.631887 | 3.546804 |          | A          | P |   |   | 4.847331 |
| 8.694999 | 9.088391 | 8.639598 | 8.544221 P | P | P | P | 9.816759 |
| 7.956768 | 8.177839 | 7.041985 | 6.378599 P | P | P | P | 7.104997 |
| 9.080221 | 7.917155 | 9.341235 | 8.290791 P | P | P | P | 8.552855 |
| 5.95793  | 7.64395  | 6.718585 | 6.530314 P | P | P | P | 7.952424 |
| 6.82968  | 8.24857  | 7.611176 | 7.159216 P | P | P | P | 7.944872 |
| 5.802913 | 6.501968 | 6.288493 | 7.123001 P | P | P | P | 6.196905 |
| 5.583967 | 3.320308 |          | A          | P |   |   | 5.864209 |
|          | 5.162413 |          |            | A |   |   |          |
|          | 5.467777 |          | 8.376993   | P |   | P |          |
| 7.148011 | 6.740442 | 8.758483 | 8.001926 M | P | A | P | 6.504184 |
| 6.915701 | 6.808286 | 6.930401 | 8.251414 P | P | P | P | 7.324185 |
| 7.443129 |          | 3.320071 | 4.220179 A |   | P | P | 6.026331 |
| 6.034496 | 6.192865 | 6.450302 | 4.500157 A | P | P | P | 5.645385 |
| 9.671353 | 10.10554 | 10.65177 | 10.98707 P | P | P | P | 9.647048 |
|          |          | 4.110735 |            |   | P |   |          |
|          | 5.759811 | 5.875262 |            | A | P |   |          |
| 6.97055  | 6.787017 | 6.257027 | P          | P | P |   | 5.539877 |
| 5.335046 | 6.514342 | 6.396799 | 6.739305 P | A | P | A | 6.508635 |
|          | 5.261945 | 6.074971 | 3.488515   | M | P | P |          |
| 9.941963 | 9.246591 | 8.511828 | 8.288528 P | P | P | P | 9.462983 |
|          |          | 6.12041  | 5.730826   |   | A | A |          |
| 7.024469 | 6.573709 | 6.8564   | 7.91734 P  | P | P | P | 7.324147 |
| 8.526639 | 9.106518 | 8.632626 | 7.813152 P | P | P | P | 9.273946 |
| 6.206896 | 7.334566 | 6.791295 | 0.983802 P | P | P | P | 6.510076 |
|          | 6.935205 | 3.341091 |            | A | P |   |          |
| 9.225407 | 9.28967  | 8.699863 | 8.251143 P | P | P | P | 9.344396 |

|          |          |          |          |   |   |   |          |
|----------|----------|----------|----------|---|---|---|----------|
| 5.855895 | 6.947152 | 6.877522 | 7.282043 | P | P | P | 6.919844 |
| 5.704033 | 4.211231 |          | A        | P |   |   | 2.818493 |
| 9.502955 | 9.446733 | 10.80766 | 10.97393 | P | P | P | 9.89003  |
| 6.102542 | 5.749514 | 5.921763 | A        | P | P |   | 5.084408 |
|          |          | 9.018342 | 10.00108 |   | A | A |          |
| 6.89534  | 7.242322 | 6.796711 | 3.97674  | P | P | P | 7.332387 |
| 6.366698 | 7.481697 | 6.079533 | 6.66618  | P | P | P | 6.293697 |
| 4.991336 |          |          | 4.758753 | A |   | P | 0.880196 |
| 8.987075 | 8.715862 | 7.969599 | 8.212274 | P | P | P | 7.962537 |
| 5.874521 | 5.294018 |          | A        | A |   |   | 4.700227 |
| 7.376551 | 6.934315 | 7.065823 | 6.515783 | P | P | P | 7.682619 |
| 9.254992 | 8.981471 | 8.217827 | 7.504659 | P | P | P | 8.8443   |
|          | 6.631316 | 3.563509 |          | M | P |   |          |
| 7.599616 | 7.499438 | 6.540741 | 5.073273 | P | P | P | 8.015589 |
| 8.99811  | 9.550706 | 8.067718 | 8.142518 | P | P | P | 9.643177 |
| 6.638611 | 6.739178 | 5.713266 | P        | P | P |   | 5.861237 |
| 7.853718 | 8.413963 | 8.752381 | 7.977174 | P | P | P | 8.128634 |
| 9.43982  | 10.14542 | 9.475167 | 8.87363  | P | P | P | 9.868114 |
| 5.026717 | 5.656159 | 5.065595 | M        | A | P |   | 4.969441 |
| 5.716206 | 5.818853 | 6.11766  | 6.012659 | P | A | M | 5.761896 |
| 5.016669 |          | 7.088636 | A        |   | A |   | 3.397099 |
| 7.820156 | 8.223771 | 7.285539 | 6.281612 | P | P | P | 7.16255  |
| 6.762844 | 6.172678 | 5.279499 | 6.95124  | P | P | P | 6.209423 |
| 10.21944 | 10.08632 | 9.460477 | 8.74496  | P | P | P | 9.427181 |
| 7.881793 | 8.159121 | 7.3096   | 6.809281 | P | P | P | 8.01393  |
|          |          | 3.271889 |          |   | P |   |          |
| 7.301331 | 7.634878 | 6.18713  | 6.931713 | A | P | P | 6.445697 |
|          |          | 5.855953 | 5.265142 |   | P | P |          |
| 7.791827 | 7.427501 | 7.412864 | 6.701495 | P | P | P | 7.397146 |
|          | 2.203692 |          |          | P |   |   |          |
| 5.002162 |          |          | 2.03974  | A |   | P | 5.195925 |
|          |          | 1.495706 |          |   | M |   |          |
|          |          | 3.204093 |          |   | P |   |          |
| 5.214978 |          |          | 5.8897   | A |   | A | 5.033332 |
|          | 5.498159 |          |          | A |   |   |          |
| 8.31564  | 8.822632 | 8.521839 | 7.584696 | P | P | P | 8.27453  |
| 6.474889 | 6.181733 | 6.803603 | 7.545765 | P | P | A | 7.065406 |
| 5.65083  | 6.626299 | 8.156979 | 7.796825 | P | A | P | 7.016582 |
|          |          | 7.656242 | 8.412652 |   | A | A |          |
| 5.893802 | 6.201493 | 5.683714 | P        | A | A |   | 6.897462 |

|          |          |          |          |   |   |   |          |
|----------|----------|----------|----------|---|---|---|----------|
| 6.307263 | 5.851719 | 7.50155  | 8.082402 | P | P | P | 7.17577  |
| 8.020891 | 8.864989 | 8.504025 | 7.709642 | P | P | P | 8.553587 |
| 8.71348  | 8.446326 | 8.718511 | 7.989257 | P | P | P | 7.614777 |
| 6.705919 | 6.689392 | 7.228696 | 6.472119 | P | P | P | 6.828857 |
| 8.085629 | 7.413744 | 8.604765 | 8.105707 | P | P | A | 8.153317 |
| 3.784871 |          | 5.398593 | P        |   | P |   | 6.025959 |
| 12.94906 | 11.23238 | 12.94103 | 12.52294 | P | P | P | 10.57111 |
| 7.625842 | 8.097599 | 7.424372 | 8.214819 | P | P | P | 7.663538 |
| 8.793285 | 8.941641 | 8.511601 | 8.253164 | P | P | P | 8.159731 |
| 6.984726 | 5.619427 | 7.027015 | 6.908733 | P | P | A | 6.177113 |
| 5.909433 | 6.580377 | 7.025436 | 7.482177 | P | A | P | 6.440554 |
| 6.926883 | 7.007251 | 6.273897 | P        | P | P |   | 6.529464 |
| 5.62176  | 0.906751 | 4.772379 | 6.103686 | P | P | A | 5.912298 |
| 4.879159 | 4.858596 |          | P        | P |   |   | 5.746928 |
| 5.481549 | 6.563242 | 4.282661 | P        | P | M |   | 5.809197 |
| 7.052236 | 6.520757 | 6.220935 | A        | P | P |   | 5.015877 |
| 6.447922 | 5.237048 |          | A        | A |   |   | 4.824722 |
|          | 6.984484 | 7.857895 |          | P | A |   |          |
| 8.333987 | 7.268063 | 7.689413 | 6.799816 | P | P | P | 6.419845 |
| 6.067346 |          | 6.546581 | A        |   | P |   | 4.737195 |
| 9.274748 | 9.568699 | 8.723298 | 10.90128 | P | P | P | 10.25345 |
| 11.26002 | 10.879   | 10.34157 | 9.215841 | P | P | P | 10.41456 |
| 11.90767 | 11.93237 | 11.28648 | 10.62037 | P | P | P | 11.12681 |
| 9.056773 | 8.942125 | 7.881539 | 8.18846  | P | P | P | 8.370001 |
| 5.111602 | 6.149883 | 6.387323 | P        | A | P |   | 7.119591 |
| 9.18707  | 8.861787 | 7.719928 | 8.075407 | P | P | P | 9.241788 |
| 9.993145 | 10.27185 | 10.02253 | 8.568894 | P | P | P | 9.708051 |
|          | 5.760207 |          |          | A |   |   |          |
| 5.643916 | 5.096309 | 6.343155 | 6.804512 | P | P | A | 4.999859 |
| 9.806438 | 10.47168 | 9.783872 | 8.820375 | P | P | P | 9.475929 |
|          |          |          | 6.116733 |   |   | A |          |
| 4.77292  |          | 5.387554 | 7.236182 |   | P | P | 5.31381  |
| 7.336499 | 7.16384  | 7.873904 | 8.29297  | P | P | P | 7.505508 |
| 5.471123 | 4.211089 |          | A        | P |   |   | 5.042488 |
|          | 5.392059 | 5.793702 |          | A | A |   |          |
| 6.715993 | 5.382834 | 2.23617  | 1.596881 | M | P | P | 5.368602 |
| 8.111755 | 8.975225 | 6.897985 | 7.532144 | P | P | P | 8.165785 |
| 7.144655 | 8.61892  | 8.236374 | 8.340115 | P | P | P | 8.898506 |
|          |          | 6.312961 |          |   | A |   |          |
| 5.350615 |          |          | 6.356665 | M |   | A | 5.140353 |

|          |          |          |          |   |   |   |          |
|----------|----------|----------|----------|---|---|---|----------|
| 9.952198 | 9.561574 | 8.815932 | 9.454598 | P | P | P | 9.215861 |
| 2.652843 |          |          | P        |   |   |   | 5.077419 |
|          | 6.533675 |          | 6.527122 | P |   | A |          |
| 6.967244 | 5.95411  | 7.059672 | 8.088624 | A | P | P | 6.674105 |
| 8.764613 | 8.716751 | 9.649462 | 8.767839 | P | P | P | 7.945633 |
| 5.831787 | 7.217495 | 5.684856 | A        | P | P |   | 6.200618 |
| 10.16916 | 9.600844 | 9.724903 | 9.156753 | P | P | P | 9.137474 |
| 5.265273 | 6.886303 |          | P        | P |   |   | 5.354098 |
| 5.945231 |          | 1.463661 | 2.423181 | A | P | P | 2.522693 |
|          |          | 7.019345 |          |   | P |   |          |
| 9.72879  | 9.447845 | 10.42619 | 10.50077 | P | P | P | 8.865745 |
| 8.749892 | 9.43506  | 10.63161 | 9.167952 | P | P | A | 8.425429 |
| 11.51304 | 11.31208 | 10.07626 | 10.18424 | P | P | P | 11.08817 |
| 2.006025 | 4.984463 | 5.703083 | P        | P | P |   | 7.009713 |
| 6.131642 | 6.187603 | 7.394512 | 6.57648  | P | P | P | 7.231884 |
| 1.200009 |          |          | P        |   |   |   | 5.49451  |
|          | 6.609127 |          | 8.091714 | A |   | A |          |
| 4.483353 | 6.040849 |          | 6.487653 | P |   | P | 5.818854 |
| 5.488306 | 6.530326 | 7.228087 | 6.711168 | P | P | A | 6.632634 |
|          | 5.230354 | 6.46627  | 7.085386 | P | A | M |          |
| 2.96307  |          |          | P        |   |   |   | 5.504496 |
| 7.66416  | 7.892239 | 5.780798 | A        | P | P |   | 7.867904 |
| 10.56061 | 11.49261 | 11.06331 | 9.530546 | P | P | P | 11.11475 |
| 5.339434 | 5.401702 |          | P        | A |   |   | 5.994003 |
| 8.457011 | 9.206112 | 9.679509 | 8.210335 | P | P | P | 9.127479 |
| 9.187773 | 10.44387 | 8.994514 | 9.037908 | P | P | P | 9.945899 |
|          |          | 2.635136 |          |   | P |   |          |
| 4.375693 | 5.950666 |          | 5.880138 | P |   | P | 5.453188 |
|          | 2.555806 |          |          | M |   |   |          |
| 5.605568 |          |          | 6.992158 | P |   | A | 6.09757  |
| 7.460123 | 7.636608 | 7.307872 | 6.825208 | P | P | P | 7.229091 |
| 4.636271 | 6.459912 | 6.14976  | P        | A | M |   | 6.47678  |
| 9.919706 | 9.065582 | 9.393131 | 9.009685 | P | P | P | 8.453938 |
| 9.764405 | 9.711305 | 9.959961 | 10.20947 | P | P | P | 9.599925 |
| 7.318172 | 6.827336 | 6.913397 | 5.877518 | P | P | P | 7.134122 |
| 10.11145 | 9.926441 | 10.05238 | 11.15502 | P | P | P | 10.31935 |
| 7.268997 | 6.438232 | 7.120494 | 7.185781 | P | A | P | 6.961415 |
| 4.868815 | 4.89946  | 6.386859 | 6.62778  | P | P | A | 6.163416 |
| 3.583235 |          |          | M        |   |   |   | 6.078209 |
| 7.427037 | 8.426538 | 7.389502 | 7.295453 | P | P | P | 7.986914 |

|          |          |          |          |   |   |   |          |
|----------|----------|----------|----------|---|---|---|----------|
| 8.330026 | 10.36375 | 9.16711  | 8.675738 | P | P | P | 9.66209  |
| 5.890346 |          | 5.980661 | 6.350898 | A | A | A | 6.318716 |
| 8.563286 | 7.756704 | 7.642213 | 7.06959  | P | P | P | 7.335253 |
| 7.781741 | 8.173818 | 8.81247  | 8.876532 | P | P | P | 7.915985 |
| 8.926342 | 9.155167 | 8.395813 | 8.305438 | P | P | P | 9.236477 |
| 2.398354 |          |          | M        |   |   |   | 5.723647 |
| 8.203769 | 7.67314  | 7.273471 | 7.266863 | P | P | P | 7.872622 |
| 11.81125 | 11.76112 | 12.12708 | 12.962   | P | P | P | 12.08781 |
|          | 5.792698 | 6.353766 | 6.960999 | P | P | A |          |
| 6.296371 | 6.303097 | 7.971831 | 7.947305 | P | P | A | 6.885741 |
| 8.403949 | 8.992523 | 7.641957 | 7.453641 | P | P | P | 8.439169 |
|          | 5.366419 |          | 5.528358 | P |   | P |          |
| 9.185827 | 9.259727 | 8.200398 | 7.489038 | P | P | P | 9.261057 |
| 5.494611 | 3.840751 |          | P        | P |   |   | 4.790491 |
|          |          | 3.877934 | 6.289222 |   | M | P |          |
| 7.618375 | 8.642036 | 7.705202 | 7.135461 | P | P | P | 7.882354 |
|          | 5.121973 |          | 6.555426 | P |   | A |          |
| 1.604234 | 6.712051 | 7.323424 | P        | P | P |   | 6.424152 |
| 5.192658 | 5.718802 | 5.685134 | P        | A | P |   | 5.688316 |
| 7.002839 | 6.263983 | 8.741135 | 9.043839 | M | P | A | 7.680283 |
| 9.095184 | 9.066377 | 9.629334 | 9.181571 | P | P | P | 8.731133 |
|          | 5.391415 | 5.794828 | 6.346487 | A | P | A |          |
| 9.51873  | 10.39133 | 9.637647 | 9.322882 | P | P | P | 9.895631 |
| 9.362514 | 9.012577 | 7.260559 | 8.526509 | P | P | P | 9.339602 |
| 8.577718 | 7.387945 | 5.950215 | 7.523579 | P | P | P | 8.465068 |
| 6.151532 | 6.088727 | 5.09674  | A        | A | P |   | 6.59397  |
| 9.779826 | 10.61805 | 9.251039 | 7.775204 | P | P | P | 9.874553 |
| 8.618591 | 8.058054 | 8.417388 | 8.85305  | P | P | P | 7.777809 |
| 8.329515 | 7.316886 | 7.94099  | 7.268902 | P | P | P | 7.862104 |
| 7.460185 |          | 5.274469 | 6.411054 |   | P | P | 6.164209 |
| 7.475404 | 6.260178 |          | A        | M |   |   | 6.75136  |
|          | 6.402213 | 8.340598 |          | A | A |   |          |
| 7.238923 | 7.482666 | 7.090879 | 7.249103 | P | P | A | 6.737144 |
| 5.930471 | 6.2296   | 3.780721 | A        | A | P |   | 6.227119 |
| 6.669936 | 7.709972 | 7.068314 | 9.043408 | A | P | A | 7.440967 |
| 7.513945 | 7.88284  | 8.550591 | 9.507767 | P | P | P | 7.722632 |
|          |          |          | 8.276629 |   |   | A |          |
| 6.989854 | 7.298934 | 8.197062 | 8.590201 | P | A | P | 7.82688  |
| 8.083444 | 7.168457 | 7.977434 | 8.6644   | P | M | P | 6.689177 |
| 8.477433 | 8.422778 | 8.57442  | 9.184134 | P | P | P | 9.002536 |



|          |          |          |          |   |   |   |          |
|----------|----------|----------|----------|---|---|---|----------|
| 5.550393 | 6.459245 |          | P        | A |   |   | 6.708423 |
|          |          |          | 6.950806 |   |   | A |          |
|          |          | 5.603181 |          |   | P |   |          |
|          |          |          | 1.97286  |   |   | P |          |
| 9.462665 | 10.28495 | 9.667729 | 8.570189 | P | P | P | 10.27454 |
| 6.030312 | 6.70126  |          | P        | A |   |   | 6.056751 |
|          |          |          | 6.040002 |   |   | A |          |
| 8.003035 | 8.017928 | 8.169866 | 6.480778 | P | P | P | 7.180749 |
| 5.445619 |          |          | A        |   |   |   | 3.814965 |
| 6.396212 | 4.905728 |          | 5.999813 | A | P | P | 6.673818 |
|          | 6.3966   | 6.716965 | 5.929615 | A | A | A |          |
| 4.640884 | 6.112155 | 4.998496 | P        | P | P |   | 5.877966 |
| 5.793609 | 6.882409 | 6.878769 | 7.807842 | P | P | P | 8.080771 |
| 4.86402  | 5.584385 |          | M        | A |   |   | 6.195597 |
|          |          | 4.629889 |          |   | A |   |          |
| 7.726708 | 7.994936 | 6.442992 | P        | P | P |   | 7.908491 |
|          | 7.08318  |          |          | P |   |   |          |
|          | 7.771779 |          | 7.5716   | P |   | P |          |
| 6.888714 | 7.269461 | 7.255798 | A        | P | P |   | 5.200366 |
| 6.211128 |          |          | A        |   |   |   | 4.157105 |
| 8.852247 | 8.853964 | 9.233224 | 8.940881 | P | P | P | 8.742158 |
|          | 5.616765 | 3.23894  |          | P | P |   |          |
|          |          | 4.640185 |          |   | M |   |          |
| 6.387826 | 5.38864  | 4.285052 | A        | P | P |   | 6.486045 |
| 4.12755  |          |          | P        |   |   |   | 6.195187 |
| 5.576554 |          |          | A        |   |   |   | 3.560232 |
|          |          | 6.158175 | 6.751247 |   | A | A |          |
| 7.223389 | 8.073428 | 7.32839  | 6.522176 | P | P | P | 7.495158 |
|          | 7.37889  | 7.322387 | 6.820685 | P | P | P |          |
| 11.05734 | 10.83971 | 11.52265 | 11.31042 | P | P | P | 10.88792 |
|          | 7.14892  | 6.112382 | 6.457488 | P | P | P |          |
| 6.406653 |          |          | 4.271866 | A |   | P | 2.593902 |
| 5.433823 |          |          | A        |   |   |   | 4.405147 |
| 8.016246 | 6.945852 | 5.68578  | 7.72022  | A | P | P | 6.118566 |
| 5.356438 |          | 3.686066 | 6.350528 | A |   | P | 5.082222 |
| 9.275038 | 9.65377  | 10.37407 | 10.07887 | P | P | P | 9.091795 |
|          | 5.191425 | 6.251633 | 6.963919 |   | P | P | A        |
| 7.773527 | 6.992348 | 3.91934  | 7.112415 | A | P | P | 4.230681 |
| 8.384427 | 8.114798 | 6.747627 | 7.878456 | P | P | P | 6.796665 |
| 7.373661 | 5.918602 | 0.880693 | 6.756818 | A | P | P | 1.368533 |

|          |          |          |          |   |   |   |   |          |
|----------|----------|----------|----------|---|---|---|---|----------|
| 6.256568 |          | 6.457085 |          | M |   | A |   | 6.320464 |
| 6.572051 | 6.258384 | 4.260846 |          | P | P | P |   | 6.215756 |
|          | 6.011543 | 5.228942 |          |   | A | P |   |          |
| 6.73335  | 6.3054   | 7.534926 | 7.092759 | A | A | A | A | 5.192235 |
|          |          | 6.955112 |          |   |   | A |   |          |
| 8.684628 | 8.009149 | 10.00013 | 10.53869 | P | P | P | P | 8.294734 |
| 8.129711 | 7.53902  | 7.51373  | 7.024371 | P | P | P | P | 6.935134 |
| 7.179518 | 7.816382 | 8.076803 | 7.612029 | P | P | P | A | 7.129681 |
| 10.98527 | 11.64024 | 11.10705 | 10.78597 | P | P | P | P | 12.35998 |
| 9.056153 | 7.750964 | 8.884381 | 8.926119 | A | A | P | A | 7.531537 |
|          |          | 6.027076 |          |   |   | A |   |          |
| 7.905039 | 8.428369 | 7.742971 | 7.810992 | P | P | P | P | 7.047887 |
| 5.313415 | 5.914773 | 6.310941 | 6.37017  | P | P | P | P | 6.360479 |
| 7.025141 | 7.752785 | 6.994986 | 6.987357 | P | P | P | P | 6.413403 |
| 6.637702 | 6.093752 | 5.624257 | 6.63939  | P | A | P | P | 7.549042 |
| 8.225265 | 8.701378 | 8.420621 | 7.314096 | A | P | M | P | 8.003569 |
| 6.649127 | 7.142388 | 6.081686 | 6.468709 | P | P | P | P | 7.150299 |
|          |          | 2.393752 |          |   |   | P |   |          |
| 8.840329 | 8.851109 | 8.376485 | 7.781211 | P | P | P | P | 7.781392 |
| 6.690375 | 6.200661 | 7.435669 |          | A | P | A |   | 5.02396  |
| 8.448595 | 7.921006 | 7.204543 | 8.005581 | P | P | P | P | 8.520313 |
| 9.369284 | 8.766588 | 8.857276 | 8.465837 | P | P | P | P | 8.186888 |
|          |          | 7.062326 |          |   |   | A |   |          |
| 8.702665 | 8.798697 | 7.365928 | 7.600452 | P | P | P | P | 8.381494 |
| 7.408017 | 7.88985  | 6.635067 | 7.026799 | P | P | P | P | 7.562242 |
| 7.463738 | 7.042947 |          | 5.175046 | P |   |   | P | 7.263886 |
| 10.81661 | 11.11119 | 10.73225 | 9.829197 | P | P | P | P | 10.83247 |
| 9.158389 | 8.2953   | 8.235305 | 7.070937 | P | P | P | P | 8.02089  |
| 6.48831  | 7.513399 | 6.33551  |          | P | P | P |   | 7.177524 |
| 9.226817 | 9.364176 | 8.857748 | 7.833214 | P | P | P | P | 8.57775  |
| 7.916602 | 8.168293 | 6.795255 | 6.520228 | P | P | P | P | 7.697551 |
| 10.17843 | 9.673913 | 9.538859 | 9.62122  | P | P | P | P | 10.65699 |
|          |          | 6.920927 |          |   |   | P |   |          |
| 7.576361 | 7.233899 | 6.49681  |          | P | P | P |   | 7.350866 |
| 6.524204 | 5.299279 |          |          | A | P |   |   | 5.913847 |
| 9.177839 | 8.964206 | 8.305932 | 8.255688 | P | P | P | P | 8.068124 |
|          |          | 6.89726  |          |   |   |   | A |          |
| 5.570551 |          |          | 6.859966 | P |   |   | P | 6.618203 |
| 6.906177 | 5.118987 | 6.268185 | 7.200582 | A | P | A | P | 5.004026 |
|          | 5.978498 |          |          |   | A |   |   |          |

|          |          |          |          |   |   |   |          |
|----------|----------|----------|----------|---|---|---|----------|
| 8.615922 | 9.216081 | 8.776215 | 7.674699 | P | P | P | 7.878501 |
| 8.822094 | 7.890841 | 9.242642 | 9.502163 | P | P | A | 8.259748 |
| 8.698154 | 9.964923 | 8.381302 | 8.107529 | P | P | P | 9.628321 |
| 7.026073 | 6.483027 | 7.177288 | 5.084063 | P | P | P | 6.924664 |
| 4.403715 | 4.41382  |          | P        | A |   |   | 5.337816 |
| 10.49081 | 8.815145 | 10.05403 | 9.175768 | P | P | P | 7.679413 |
| 8.449914 | 9.754285 | 8.233612 | 7.44964  | P | P | P | 8.171603 |
|          |          | 8.243756 |          |   | A |   |          |
| 8.030087 | 9.121299 | 8.875555 | 7.234732 | P | P | P | 8.787068 |
|          |          |          | 2.345355 |   |   | P |          |
| 6.878384 | 6.295049 | 6.922966 | 8.028307 | P | P | A | 7.212874 |
| 6.692924 |          | 7.676858 | 7.497131 |   | P | P | 5.740665 |
| 7.127225 |          | 7.181131 | 7.941939 |   | P | A | 6.622837 |
| 12.31288 | 12.6936  | 11.88623 | 11.21696 | P | P | P | 12.34753 |
| 6.560611 | 6.919521 | 6.586434 | A        | P | P |   | 6.325132 |
| 5.121593 |          |          | A        |   |   |   | 2.425539 |
| 7.046588 | 7.094543 | 7.288954 | 4.956518 | P | P | P | 7.397303 |
| 5.514499 |          |          | 4.264998 |   |   | P | 6.819728 |
|          | 6.393792 | 5.681506 |          | P | P |   |          |
| 4.485365 | 4.986246 | 0.951487 | M        | P | M |   | 5.19176  |
| 5.590038 | 6.14688  | 1.226796 | 4.189836 | A | P | P | 6.599894 |
|          | 6.29362  | 6.607421 | 7.242551 | P | A | A |          |
| 7.083919 | 7.133905 | 7.574338 | 6.05712  | P | P | P | 6.551504 |
|          | 4.623444 | 6.890942 | 6.505855 | P | P | A |          |
| 9.451537 | 9.321125 | 8.46174  | 8.181499 | P | P | P | 9.003194 |
| 7.631461 | 7.708744 | 6.620263 | 6.61748  | P | P | P | 7.138613 |
| 9.450088 | 9.87489  | 9.03999  | 8.641887 | P | P | P | 9.004496 |
| 8.590405 | 8.305516 | 9.491172 | 9.820889 | P | P | P | 8.530831 |
|          | 5.7862   | 7.510498 | 7.556882 | P | A | A |          |
| 7.257889 | 6.865882 | 8.341103 | 7.134322 | P | P | A | 6.642524 |
|          |          |          | 4.024516 |   |   | M |          |
| 7.068046 | 6.642439 | 6.802175 | 7.115127 | P | A | M | 7.494946 |
| 8.681224 | 8.912418 | 8.095733 | 8.202505 | P | P | P | 8.78462  |
| 6.546475 |          |          | A        |   |   |   | 4.912353 |
| 5.662732 |          |          | A        |   |   |   | 0.323683 |
| 5.464738 | 4.385995 |          | P        | P |   |   | 5.823935 |
| 8.1815   | 7.552447 | 7.752    | 7.314076 | P | P | P | 8.049749 |
| 6.198897 | 5.426296 | 6.153334 | 6.952423 | P | P | P | 7.417183 |
| 6.142915 | 7.334243 | 6.633133 | 7.417868 | P | P | P | 7.530393 |
| 10.71654 | 10.86549 | 9.932942 | 9.222692 | P | P | P | 10.13994 |

|          |          |          |          |   |   |   |          |
|----------|----------|----------|----------|---|---|---|----------|
| 7.795557 | 7.965405 | 8.56669  | 8.261779 | P | P | P | 7.454347 |
| 7.876987 | 7.313363 | 8.408261 | 7.867368 | P | P | P | 7.927088 |
| 2.669869 | 6.30347  | 7.377972 | P        | P | P |   | 6.050812 |
|          | 5.925475 |          |          | A |   |   |          |
| 5.022615 | 6.51615  | 5.251419 | 6.250329 | P | P | P | 5.943201 |
| 5.765035 |          |          | M        |   |   |   | 6.88223  |
| 5.765225 | 6.190819 |          | 8.12384  | P | A | A | 5.646592 |
| 6.169704 | 5.822552 | 3.447341 | 7.532899 | M | P | A | 6.178224 |
| 8.850415 | 9.15278  | 9.033639 | 7.925005 | P | P | P | 8.682379 |
| 5.510954 | 5.343059 | 6.016033 | A        | A | P |   | 5.601893 |
| 7.651068 | 6.795756 | 7.313787 | 7.406033 | P | P | P | 7.662977 |
|          | 5.748357 |          | 7.114632 | P |   | A |          |
|          |          |          | 6.2427   |   |   | A |          |
| 7.238336 | 7.000092 |          | 8.360345 | A | P | A | 6.448703 |
| 12.33956 | 11.897   | 11.49302 | 11.51732 | P | P | P | 11.51123 |
| 7.130749 | 6.626946 | 7.771247 | 8.723907 | P | P | P | 7.387018 |
|          | 5.861857 | 5.289317 | 6.062317 | P | P | P |          |
| 7.377209 | 6.941981 | 6.835859 | 7.716856 | A | P | A | 6.469672 |
| 6.90725  | 7.381743 | 6.843762 | 6.765347 | P | P | P | 7.263152 |
|          | 8.134777 | 7.054406 |          | P | P |   |          |
| 12.29496 | 12.1564  | 11.47503 | 11.76264 | P | P | P | 12.11939 |
| 5.935813 |          |          | 6.370027 | A |   | A | 3.747728 |
| 8.319839 | 9.18058  | 7.647927 | 7.889505 | P | P | P | 9.154635 |
| 6.645671 | 6.663641 |          | 5.359068 | P |   | M | 7.315681 |
| 6.717744 |          | 5.690088 | 4.978652 | P | P | P | 5.667074 |
| 6.594869 | 6.613108 | 6.157808 | 3.242025 | P | P | P | 6.498799 |
| 6.812159 | 7.820704 | 6.547322 | 6.412689 | P | P | P | 7.257001 |
|          |          |          | 4.886036 |   |   | M |          |
| 6.213675 | 6.492593 |          | 2.355821 | P | A | P | 5.858195 |
| 5.160822 | 5.660241 | 6.17421  | P        | P | A |   | 6.105321 |
| 7.763259 |          | 9.624689 | 9.168718 | P | P | A | 6.56514  |
| 12.03208 | 11.31667 | 12.74254 | 12.72392 | P | P | P | 10.82159 |
| 7.166115 | 7.580387 | 7.856257 | 7.535321 | A | A | A | 6.057201 |
| 6.487867 |          |          | 7.27809  | A |   | P | 5.388699 |
| 5.079456 | 6.225264 | 4.975726 | 7.094631 | P | A | M | 5.991817 |
| 5.130333 | 4.812065 | 6.095142 | A        | P | P |   | 4.549608 |
| 5.417147 | 6.150087 | 5.189449 | 7.512953 | P | P | M | 6.396933 |
| 7.270917 |          |          | A        |   |   |   | 5.217158 |
| 8.152441 | 8.407292 | 7.673837 | 7.636246 | P | P | P | 7.607171 |
| 7.366108 | 7.286534 | 6.36407  | 5.954101 | P | A | P | 6.833218 |

|          |          |          |            |   |   |   |          |
|----------|----------|----------|------------|---|---|---|----------|
|          | 5.326657 |          | 6.133019   | P |   | P |          |
| 5.557903 | 4.96946  | 5.620931 | 6.702192 P | A | P | A | 5.093513 |
| 7.663765 | 6.496097 | 7.274098 | 6.641646 P | P | P | P | 6.465941 |
| 10.18604 | 10.02797 | 10.47273 | 9.910371 P | P | P | P | 11.60262 |
| 7.116308 | 7.183368 | 6.558147 | 6.48384 P  | P | P | P | 6.649489 |
|          | 5.502693 | 1.87258  | 5.359536   | A | P | P |          |
| 7.295379 | 6.920617 | 5.551515 | 6.928464 P | P | P | P | 7.165259 |
| 10.26058 | 10.46116 | 9.750447 | 9.315312 P | P | P | P | 10.40625 |
| 6.186738 | 5.521962 | 6.721844 | 6.181448 A | A | A | P | 5.428207 |
| 7.250831 | 6.106762 | 6.958871 | 7.22767 P  | A | A | P | 6.978756 |
| 5.189822 | 5.53483  | 5.549111 | 5.244179 P | P | P | P | 6.220923 |
| 8.886535 | 10.10895 | 7.930821 | 7.45487 P  | P | P | P | 9.614092 |
| 7.380784 | 7.101918 | 8.262819 | 7.272678 P | P | P | P | 6.808988 |
| 6.505096 | 5.952641 | 6.969962 | 6.736203 P | P | P | P | 6.40505  |
|          | 6.243131 | 6.980169 | 4.154943   | P | P | M |          |
| 10.86652 | 11.89461 | 10.53304 | 9.89616 P  | P | P | P | 11.49963 |
| 7.011361 | 7.141666 | 5.469799 | 5.491869 A | P | P | P | 4.867279 |
| 6.943451 | 8.402214 | 7.804287 | 9.361051 P | P | P | P | 8.473737 |
| 6.385162 | 4.778824 |          | 6.441865 A | A |   | P | 5.764986 |
| 5.823527 |          | 7.819106 | M          |   | M |   | 7.507736 |
| 7.225438 | 7.066354 | 6.54059  | 2.789666 M | P | P | P | 6.75166  |
|          | 4.993081 | 6.016638 |            | M | P |   |          |
| 5.54653  | 6.244456 | 5.549582 | 3.572684 P | P | P | P | 6.039033 |
| 7.693724 | 7.496115 | 6.850826 | 8.727906 A | A | P | A | 8.085441 |
| 10.34094 | 10.76995 | 11.43683 | 11.17195 P | P | P | P | 11.31496 |
| 7.093039 | 7.324009 | 7.187243 | 6.263373 P | P | P | P | 6.978563 |
| 8.053519 | 8.401243 | 8.365707 | 7.626218 P | P | P | M | 7.847421 |
| 12.15944 | 11.55889 | 11.40497 | 10.79008 P | P | P | P | 10.97793 |
| 7.117324 | 6.623514 | 6.855973 | 6.302257 P | P | A | P | 7.119072 |
| 11.65668 | 11.22452 | 11.11397 | 10.51742 P | P | P | P | 11.20339 |
| 8.746572 | 7.882614 | 8.172282 | 6.625341 P | P | P | P | 8.788129 |
| 5.948945 | 5.114279 | 5.039359 | 5.5227 P   | A | P | P | 5.077518 |
|          | 6.196961 |          | 6.671047   | A |   | A |          |
| 8.727706 | 9.110106 | 8.301337 | 7.625214 P | P | P | P | 8.429072 |
| 6.12198  | 6.274311 | 6.925231 | M          | A | M |   | 6.013125 |
| 6.175647 |          |          | A          |   |   |   | 3.052769 |
| 7.741841 |          | 7.616163 | 8.174484 A |   | A | A | 2.796891 |
| 11.18016 | 11.16418 | 11.62228 | 13.11782 P | P | P | P | 11.83958 |
| 7.216608 | 6.988196 | 3.718871 | 4.586906 P | P | P | P | 7.692409 |
| 12.85072 | 11.84144 | 10.37023 | 10.79027 P | P | P | P | 12.14309 |

|          |          |          |          |   |   |   |   |          |
|----------|----------|----------|----------|---|---|---|---|----------|
| 4.888853 |          |          |          | M |   |   |   | 6.549242 |
| 6.214755 | 6.021413 | 5.645135 | 5.829428 | P | P | P | P | 6.590683 |
| 10.52294 |          | 12.47327 | 12.10606 | A |   | A | A | 10.60194 |
| 5.320348 |          |          |          | A |   |   |   | 1.599011 |
| 9.070816 | 8.852538 | 8.409413 | 7.829164 | P | P | P | P | 7.742607 |
| 7.630554 | 7.796078 | 9.443357 | 9.612671 | P | P | P | P | 6.630684 |
| 8.1883   | 8.060219 | 10.19363 | 11.41049 | P | P | P | P | 7.895765 |
|          | 6.319128 | 7.254254 | 7.413076 | A | A | M |   |          |
| 9.930076 | 10.2975  | 9.665284 | 9.071804 | P | P | P | P | 9.832377 |
|          |          | 2.383475 |          |   | P |   |   |          |
| 7.281626 | 7.467906 | 6.661695 |          | A | P | P |   | 4.945272 |
|          |          |          | 6.57487  |   |   |   | A |          |
| 8.934002 | 8.964334 | 7.521349 | 7.767952 | P | P | P | P | 8.966557 |
| 7.001668 | 7.145783 | 5.857004 | 4.884177 | P | P | P | P | 7.483081 |
| 7.752575 | 7.795943 | 7.068366 | 5.802818 | P | P | P | P | 7.164413 |
| 6.906946 | 6.796094 | 6.08907  | 6.769829 | P | P | P | P | 7.061341 |
| 6.794539 | 6.045562 | 5.084524 | 6.270161 | A | P | P | P | 6.359299 |
| 6.621409 | 6.885335 | 7.648743 | 7.701079 | P | P | P | P | 7.578168 |
| 5.8364   | 5.264052 | 2.016756 |          | A | P | P |   | 5.339475 |
| 6.687843 | 6.830013 |          | 7.867938 | A | P |   | A | 5.947397 |
| 8.266974 | 7.27449  | 8.502844 | 10.01367 | P | P | A | P | 8.030198 |
| 5.536908 | 3.425653 | 5.328666 |          | P | M | P |   | 5.064281 |
| 9.523535 | 9.072292 | 10.75497 | 11.78056 | P | P | P | P | 10.7112  |
| 6.374034 | 5.197218 | 6.614977 | 6.93521  | P | P | M | M | 6.56147  |
|          | 2.129975 |          | 6.644662 | M |   |   | A |          |
| 6.948741 | 8.454654 | 6.667399 | 7.129951 | P | P | P | P | 8.252776 |
|          |          |          | 6.024492 |   |   |   | A |          |
|          | 5.137458 |          |          | A |   |   |   |          |
| 8.644276 | 8.185045 | 7.738784 | 7.630907 | A | P | P | P | 7.89115  |
| 9.623326 | 9.523451 | 11.99026 | 11.86293 | P | P | P | P | 9.887255 |
| 5.874021 | 5.77882  |          | 5.253544 | P | A |   | P | 4.880776 |
| 5.355761 | 5.55751  | 5.510092 | 5.189399 | A | P | P | P | 5.24933  |
| 8.215902 | 8.42765  | 7.483175 | 7.513788 | P | P | P | P | 7.201446 |
| 6.406852 | 6.922485 | 6.111383 | 7.440615 | A | P | P | A | 6.041587 |
| 6.926201 | 6.643814 | 7.802403 | 8.961136 | P | P | P | P | 7.304551 |
| 7.459001 | 6.482082 | 7.406663 | 7.230093 | P | P | P | P | 6.713741 |
| 7.301902 |          | 5.864427 |          | P |   | P |   | 6.547836 |
| 7.192332 | 6.76228  | 8.497429 |          | P | A | A |   | 6.518843 |
| 5.237795 | 6.321993 | 4.086135 |          | P | P | M |   | 7.070309 |
| 8.033436 | 7.732493 | 7.954499 | 9.060095 | P | P | P | P | 8.067323 |

|          |          |          |            |   |   |   |          |
|----------|----------|----------|------------|---|---|---|----------|
| 5.954653 | 5.967008 |          | A          | A |   |   | 2.104478 |
| 5.34372  |          |          | 7.495156 P |   |   | P | 6.368525 |
| 5.187585 | 6.214672 | 3.468123 | P          | P | P |   | 5.902209 |
| 9.026796 | 8.874602 | 7.366897 | 7.381083 P | P | P | P | 9.125104 |
| 6.774732 | 7.824323 | 3.72452  | 5.599006 P | P | P | P | 7.444021 |
| 7.916874 | 9.170402 | 5.454238 | 4.784863 P | P | P | P | 8.756249 |
| 12.64714 | 12.55299 | 13.27757 | 14.36612 P | P | P | P | 13.06092 |
| 7.013529 | 6.395769 | 6.008939 | 5.1767 A   | P | P | P | 6.422421 |
| 7.896316 | 7.260058 | 7.983738 | 6.549742 P | P | P | P | 6.778565 |
|          | 5.79761  |          | 6.320563   | A |   | A |          |
| 8.901896 | 9.085805 | 7.969796 | 8.745527 P | P | P | P | 9.09117  |
|          |          | 6.630751 | 6.614383   |   | A | P |          |
| 7.532393 | 8.040369 | 7.620828 | 6.299687 P | P | P | P | 7.772354 |
| 7.545827 | 7.860678 | 8.182439 | 7.239749 P | P | P | P | 7.577724 |
|          |          |          | 7.080063   |   |   | A |          |
| 7.452753 | 7.48123  | 7.257389 | 7.455231 P | P | P | P | 6.902301 |
| 7.21767  | 6.852305 | 8.107318 | 8.009888 P | P | P | P | 6.973918 |
|          |          | 4.816561 |            |   | P |   |          |
| 7.62262  | 8.415136 | 8.350119 | 6.06733 P  | P | P | P | 7.732481 |
| 4.381861 |          |          | P          |   |   |   | 5.944296 |
| 7.094313 | 6.187121 | 7.338939 | 6.817467 P | A | M | P | 8.277694 |
|          | 5.242646 |          | 4.613588   | A |   | P |          |
| 6.120715 | 4.246778 | 6.876163 | 7.49729 P  | P | P | P | 6.439289 |
| 3.730463 | 5.361322 |          | M          | A |   |   | 5.685515 |
| 5.883363 | 5.739578 | 6.836957 | 6.328406 P | M | A | P | 7.03215  |
| 6.600587 | 5.229802 | 6.947903 | 7.000979 P | P | P | A | 6.566958 |
| 6.292283 | 5.523008 | 6.191316 | 6.872381 P | P | P | P | 6.506382 |
|          | 5.184252 | 6.501657 | 7.297707   | A | A | A |          |
| 6.225514 | 7.227259 | 6.64377  | 6.043048 P | P | P | P | 7.255375 |
| 5.737405 | 5.816324 | 4.542517 | A          | P | P |   | 4.06488  |
| 5.800173 | 4.316829 | 6.386574 | 7.009682 P | P | M | P | 5.676503 |
| 8.873331 | 9.275807 | 8.702683 | 8.116829 P | P | P | P | 8.604225 |
|          |          | 5.020924 | 2.916928   |   | P | P |          |
|          |          |          | 6.42093    |   |   | A |          |
|          |          | 5.109385 | 7.344484   |   | P | P |          |
| 7.19307  | 7.597869 | 4.969847 | 3.329659 P | P | P | P | 7.312907 |
| 8.373127 | 8.897408 | 9.278808 | 8.600927 P | P | P | P | 8.93463  |
| 4.764066 |          |          | M          |   |   |   | 6.656174 |
| 2.605353 |          |          | P          |   |   |   | 6.457665 |
| 10.87721 | 10.50077 | 9.766966 | 9.239249 P | P | P | P | 9.680384 |

|          |          |          |          |   |   |   |   |          |
|----------|----------|----------|----------|---|---|---|---|----------|
| 8.014914 | 7.811546 | 8.382746 | 8.808066 | A | P | P | A | 7.636473 |
| 8.735959 | 8.05577  | 9.48102  | 7.797672 | P | P | P | P | 8.85039  |
| 6.526308 | 6.098607 | 6.191334 | 5.146665 | P | A | P | P | 6.583532 |
| 7.325472 | 6.937128 | 7.376378 | 6.499079 | P | P | P | P | 7.038724 |
| 4.749049 | 5.467729 |          |          | M | P |   |   | 5.807921 |
| 10.26102 | 10.20497 | 8.929056 | 8.709048 | P | P | P | P | 10.23152 |
| 10.21191 | 9.938244 | 9.20503  | 8.062552 | P | P | P | P | 9.881068 |
| 4.910865 | 5.244291 |          |          | P | A |   |   | 6.325125 |
|          | 5.654714 | 2.659721 | 3.64667  |   | P | P | P |          |
|          | 7.47434  | 6.638992 |          |   | P | P |   |          |
| 5.719111 | 5.548533 |          |          | P | M |   |   | 7.221633 |
| 8.307946 | 9.233033 | 8.058452 | 7.571653 | P | P | P | P | 8.737705 |
|          |          | 4.2396   |          |   |   | M |   |          |
| 6.332387 | 5.816003 | 6.399693 | 6.836708 | P | P | P | P | 6.072751 |
| 4.083042 |          |          |          | M |   |   |   | 6.857112 |
|          | 5.048346 |          |          |   | A |   |   |          |
| 5.205096 | 4.953893 |          | 1.869314 | P | M |   | P | 4.609565 |
| 6.367882 |          | 7.438368 |          | P |   | A |   | 7.152644 |
| 7.476796 | 7.017036 | 6.839529 | 6.843213 | P | P | P | P | 7.348472 |
|          | 6.988116 | 3.288815 |          |   | A | P |   |          |
|          |          |          | 7.046174 |   |   |   | A |          |
| 6.580622 |          |          |          | A |   |   |   | 5.167917 |
|          |          | 5.934697 | 6.735458 |   |   | A | A |          |
| 5.231479 |          |          |          | P |   |   |   | 6.426687 |
| 6.582178 | 7.241098 | 6.745164 | 2.110489 | P | P | P | P | 6.377527 |
| 7.581724 |          | 8.274454 |          | A |   | P |   | 6.819648 |
| 8.258835 | 7.717448 | 8.482889 | 9.039605 | A | P | A | M | 7.936163 |
| 6.219727 | 6.152574 | 5.979292 | 7.008717 | P | P | P | M | 7.341046 |
| 4.502495 | 7.298989 | 2.341817 | 5.516037 | P | P | P | M | 7.299017 |
| 7.799306 | 8.182813 | 7.957065 | 7.921654 | P | P | P | P | 8.74036  |
| 5.42594  | 5.255148 | 6.289097 | 7.166061 | P | M | P | P | 6.825096 |
| 10.81203 | 9.62276  | 11.85919 | 12.30934 | P | P | P | P | 9.112365 |
| 4.87196  |          | 7.369348 | 6.929576 | P |   | P | P | 6.621931 |
|          | 5.848182 |          | 6.210312 |   | A |   | A |          |
|          | 5.782376 |          | 6.567755 |   | P |   | A |          |
| 7.154862 | 7.010887 |          | 3.822696 | P | P |   | P | 6.625824 |
| 6.905322 | 6.526003 | 6.475929 | 5.819063 | A | P | P | P | 6.413857 |
| 7.707314 | 5.609644 | 7.150624 | 7.663468 | P | A | P | A | 6.983298 |
|          | 4.12848  |          |          |   | P |   |   |          |
| 9.656543 | 9.150728 | 9.065048 | 9.225054 | P | P | P | P | 8.618086 |



|          |          |          |          |   |   |   |   |          |
|----------|----------|----------|----------|---|---|---|---|----------|
| 9.63212  | 7.662573 |          |          | A | A |   |   | 7.88015  |
| 11.45351 | 11.61245 | 10.69418 | 10.75902 | P | P | P | P | 11.66557 |
|          |          | 6.702013 | 7.072772 |   |   | A | A |          |
|          | 2.306307 | 1.378962 |          | P | P |   |   |          |
|          |          | 5.155873 |          |   | A |   |   |          |
| 5.681391 |          | 5.690251 |          | P | P |   |   | 7.160836 |
| 9.641533 | 8.572619 | 10.16025 | 9.635182 | P | P | P | P | 9.191104 |
| 5.775554 | 5.475676 | 6.310966 | 5.797937 | P | A | P | A | 5.527224 |
|          |          |          | 3.052549 |   |   |   | P |          |
| 4.733721 |          | 2.394376 |          | P |   | P |   | 5.68293  |
| 6.309751 | 7.420662 | 6.835654 | 6.7642   | P | P | P | P | 7.19097  |
| 6.508662 | 5.436466 | 4.619419 | 6.324437 | A | P | M | P | 6.22669  |
| 6.90299  | 6.899388 | 6.772729 | 8.188064 | P | P | P | A | 7.322311 |
|          | 3.163513 |          |          | P |   |   |   |          |
| 6.43189  | 7.068371 | 5.751569 |          | A | A | P |   | 5.211372 |
| 7.871035 | 5.828301 | 6.21408  | 6.758869 | P | P | P | P | 5.728449 |
| 10.43982 | 10.03902 | 9.504987 | 8.700133 | P | P | P | P | 9.77236  |
| 6.293764 |          |          | 7.589582 | A |   |   | A | 6.251829 |
|          |          | 4.650092 |          |   |   | M |   |          |
| 7.641886 | 8.217504 | 7.384789 | 7.083038 | P | P | P | P | 7.991467 |
| 7.438837 | 6.525466 | 6.973175 | 7.17415  | P | P | P | P | 6.38707  |
| 5.576388 |          | 5.584581 | 7.135076 | A |   | A | P | 5.57145  |
| 7.909065 | 8.364888 | 8.146172 | 7.273327 | P | P | P | P | 8.214213 |
| 7.443749 | 6.773734 | 5.188336 | 6.416957 | A | P | P | P | 6.093465 |
| 5.327709 | 4.378151 | 3.474038 |          | A | P | M |   | 4.750284 |
| 8.80176  | 8.173507 | 7.65964  | 7.236633 | P | P | P | P | 8.299647 |
|          |          | 6.339408 | 6.261608 |   |   | A | P |          |
| 9.187671 | 9.443981 | 9.568651 | 10.1423  | P | P | P | P | 9.367079 |
| 7.20824  | 7.3971   | 7.277306 | 2.47083  | P | P | P | P | 7.637922 |
| 7.038683 | 7.31904  | 6.611207 |          | A | P | P |   | 5.169827 |
|          | 4.378839 | 1.42755  | 4.563873 |   | P | P | M |          |
|          | 5.816396 |          |          | A |   |   |   |          |
| 11.76601 | 11.68116 | 11.46462 | 10.67708 | P | P | P | P | 11.23868 |
| 8.925782 | 8.725914 | 8.456225 | 7.65069  | P | P | P | P | 8.234897 |
| 5.343095 |          |          | 6.876561 | P |   |   | A | 6.173469 |
| 5.029664 | 5.562816 | 5.587054 | 0.846077 | P | M | P | P | 6.255565 |
|          | 7.670147 | 7.172587 |          |   | P | P |   |          |
| 5.901681 | 6.671681 | 4.677095 |          | P | A | P |   | 6.373745 |
| 8.230879 | 8.57318  | 7.659528 | 6.739914 | P | P | P | P | 7.740052 |
|          | 6.075969 |          | 5.34885  | P |   |   | P |          |

|          |          |          |            |   |   |   |          |
|----------|----------|----------|------------|---|---|---|----------|
|          | 4.315962 | 6.21079  |            | M | A |   |          |
|          | 2.691905 |          |            | P |   |   |          |
| 9.658327 | 9.696737 | 7.985205 | 8.293274 P | P | P | P | 9.421552 |
| 9.982064 | 9.178565 | 8.288318 | 8.973833 P | P | P | P | 9.973365 |
| 8.101083 | 8.693263 | 8.169028 | 7.22932 P  | P | P | P | 8.700356 |
| 10.79653 | 11.88299 | 12.51661 | 12.32853 P | P | P | P | 12.43928 |
| 10.723   | 11.79435 | 12.30822 | 12.12964 P | P | P | P | 12.18445 |
| 6.463851 | 6.638903 |          | 8.031338 P | A |   | A | 7.209701 |
|          | 5.933113 | 5.566251 | 6.012411   | A | P | A |          |
| 6.817246 | 7.139266 | 6.114146 | 6.373903 M | P | P | P | 6.896275 |
| 5.614643 |          |          | 7.049118 P |   |   | P | 6.63961  |
| 9.173975 | 7.273857 | 6.861069 | 8.051839 A | P | P | P | 7.498243 |
| 7.707571 | 5.639132 | 6.67142  | 5.637166 P | P | P | P | 6.711682 |
| 7.998661 | 6.334417 | 5.050506 | P          | P | P |   | 7.21365  |
|          | 6.240655 | 6.417388 | 4.85851    | P | A | P |          |
| 5.940198 | 5.571255 | 6.815758 | 7.441936 M | A | P | P | 6.139213 |
| 9.249084 | 9.38667  | 7.570936 | 9.05443 P  | P | P | P | 9.844507 |
| 5.08829  | 5.874199 | 7.024029 | 7.87101 P  | A | A | A | 5.912679 |
|          | 5.890693 | 5.208725 |            | A | P |   |          |
|          | 3.734781 |          |            | P |   |   |          |
| 5.609088 | 2.095042 |          | P          | P |   |   | 6.057636 |
| 3.899498 |          | 3.005498 | P          |   | P |   | 5.87743  |
| 5.362149 | 5.434342 | 1.213444 | A          | A | P |   | 5.654792 |
|          |          | 2.901987 |            |   | P |   |          |
|          | 5.43341  | 5.429421 |            | A | A |   |          |
| 7.672316 | 8.209841 | 7.280737 | 5.461817 P | P | P | P | 7.714869 |
|          |          | 6.560859 |            |   | A |   |          |
| 6.622546 | 7.372644 | 6.886717 | 3.999984 P | P | P | P | 7.679115 |
| 5.320106 | 6.125782 | 2.966806 | 5.986401 P | P | P | P | 5.601953 |
| 4.530649 | 5.460069 | 5.095959 | 6.80991 P  | A | P | A | 6.247248 |
|          | 4.344749 |          |            | M |   |   |          |
|          | 5.602183 |          |            | A |   |   |          |
| 6.291384 | 5.298494 | 4.051282 | A          | A | P |   | 6.271362 |
|          |          | 3.560409 |            |   | P |   |          |
| 6.837645 | 6.13974  | 6.045298 | A          | A | P |   | 5.498541 |
|          |          | 7.938428 |            |   | A |   |          |
|          | 5.950337 |          |            | A |   |   |          |
|          | 2.379341 | 5.645231 | 6.63037    | P | P | P |          |
|          | 5.185572 |          |            | A |   |   |          |
| 10.29348 | 10.85462 | 11.36101 | 11.54419 P | P | P | P | 10.85032 |

|          |          |          |          |   |   |   |          |
|----------|----------|----------|----------|---|---|---|----------|
| 6.396554 | 6.410783 | 6.334006 | 4.675276 | P | P | P | 6.293548 |
| 4.101692 |          | 4.199435 | M        |   | M |   | 5.136033 |
|          | 6.350881 |          |          | A |   |   |          |
|          |          | 6.342878 | 5.70922  |   | A | A |          |
|          | 5.727979 | 1.617861 |          | A | M |   |          |
| 7.935442 | 7.284757 | 8.036274 | 6.686312 | P | P | P | 7.722769 |
| 6.876007 | 6.383915 | 6.463605 | 6.837343 | P | P | A | 6.526005 |
|          | 7.697467 | 7.110395 |          | A | P |   |          |
| 6.817983 | 6.806716 | 7.73004  | P        | P | M |   | 6.916361 |
|          | 5.918109 |          |          | A |   |   |          |
|          | 7.076919 | 3.910631 |          | A | P |   |          |
| 6.312268 | 6.104179 |          | 4.972008 | P |   | P | 7.666392 |
|          | 5.29561  |          | 2.201097 | P |   | P |          |
| 6.801822 | 7.406706 | 8.142731 | 8.109026 | P | P | P | 8.27281  |
| 7.569639 | 7.255479 | 7.605579 | 8.611335 | P | P | P | 7.698192 |
|          | 3.894623 |          |          | P |   |   |          |
| 6.326551 | 6.56186  | 7.333127 | 7.864235 | P | P | P | 7.416728 |
| 6.128684 | 5.987324 | 7.121789 | 7.428742 | A | A | P | 3.591711 |
| 10.98834 | 10.71415 | 10.27623 | 9.320455 | P | P | P | 10.33366 |
|          |          |          | 6.835871 |   |   | A |          |
| 5.574128 |          |          | 4.947499 | A |   | M | 5.898944 |
| 5.463224 | 5.626916 | 3.357574 | A        | A | P |   | 5.860467 |
| 7.006079 | 7.001869 | 7.888575 | 8.426227 | M | P | P | 7.04612  |
| 6.795782 |          | 7.598445 | M        |   | A |   | 6.449262 |
| 7.183905 | 6.768649 | 6.151022 | 3.472119 | P | P | P | 7.105849 |
| 8.439975 | 8.184532 | 7.182307 | 7.907819 | P | P | P | 8.794028 |
|          | 2.520155 |          |          | M |   |   |          |
| 9.615279 | 8.499196 | 6.826216 | 7.776438 | P | P | P | 7.713597 |
|          |          | 7.158151 |          |   | A |   |          |
| 7.112109 | 6.130943 | 6.425502 | A        | A | P |   | 5.470174 |
| 6.986179 | 6.969274 | 7.600405 | 8.126479 | P | P | P | 7.031759 |
| 7.883936 | 7.422699 | 7.447649 | 6.06861  | P | P | P | 6.872106 |
|          | 6.537548 | 7.045    | 6.734296 | P | P | A |          |
| 6.444724 | 6.374523 | 5.209334 | 6.806987 | P | P | P | 5.17396  |
| 8.346892 | 7.272138 | 8.253959 | 8.546583 | P | P | P | 7.29431  |
| 7.111688 |          | 7.084358 | A        |   | A |   | 6.655198 |
| 8.925674 | 7.353402 | 9.649316 | 7.941904 | P | P | P | 6.817324 |
| 6.413433 |          | 6.270664 | 6.95056  |   | M | A | 6.325554 |
|          |          |          | 8.14908  |   |   | A |          |
|          |          |          | 3.680601 |   |   | P |          |

|          |          |          |            |   |   |   |          |
|----------|----------|----------|------------|---|---|---|----------|
|          |          | 7.139516 | 7.361829   |   | A | A |          |
|          | 5.774767 | 5.618954 | 2.073437   | M | P | P |          |
| 5.348203 | 5.691476 | 2.760456 | A          | A | P |   | 4.874589 |
|          | 5.266481 |          |            | A |   |   |          |
| 10.4912  | 11.21533 | 11.1466  | 11.52588 P | P | P | P | 11.49783 |
| 6.87047  | 6.920313 | 7.204806 | 7.173461 P | P | P | P | 6.319294 |
| 9.90083  | 10.41341 | 9.393868 | 8.787168 P | P | P | P | 10.008   |
| 7.485216 | 7.271854 | 6.800768 | 3.538257 P | P | P | P | 7.397917 |
| 5.872004 | 5.785517 | 6.337277 | 5.95891 A  | P | P | P | 4.657864 |
| 5.428205 | 5.813695 |          | A          | M |   |   | 5.856262 |
| 5.696577 |          |          | 7.334762 M |   |   | A | 6.46479  |
| 5.616968 | 4.934334 | 7.580901 | 7.774058 P | A | M | P | 6.403211 |
|          |          | 5.845235 |            |   | A |   |          |
|          | 5.945407 |          |            | A |   |   |          |
| 6.536793 | 5.816745 | 6.514703 | A          | P | A |   | 4.898067 |
| 7.258576 | 6.286444 | 7.625629 | 7.820426 P | A | A | A | 7.185451 |
| 7.94543  | 8.620688 | 9.671808 | 8.338408 P | P | P | P | 8.517861 |
| 7.059924 | 8.187671 | 7.7085   | P          | P | P |   | 7.336127 |
| 7.496607 |          |          | A          |   |   |   | 5.697548 |
| 7.091637 | 8.396714 | 7.372708 | 5.893277 P | P | P | P | 8.588533 |
| 7.585728 | 8.800546 | 7.497668 | 8.517812 P | P | P | P | 9.099753 |
| 5.960767 | 5.971286 |          | P          | A |   |   | 6.274092 |
|          |          | 8.085608 |            |   |   | P |          |
| 6.348603 | 6.907599 |          | M          | A |   |   | 7.213182 |
| 4.369029 | 4.1042   |          | P          | P |   |   | 6.552256 |
|          | 5.019699 | 4.769909 |            | P | P |   |          |
| 7.283351 | 7.237092 | 7.044314 | 8.340374 P | P | P | A | 7.885255 |
| 5.981006 |          | 5.127389 | P          |   | P |   | 6.346522 |
| 8.640671 | 8.856683 | 8.11755  | 7.262512 P | P | P | P | 8.342047 |
| 5.527351 |          | 6.308562 | 5.563093 A |   | A | P | 4.057188 |
|          |          | 4.412897 |            |   | P |   |          |
| 10.81308 | 12.10521 | 11.07532 | 9.827388 P | P | P | P | 11.63343 |
| 6.991944 | 7.247471 | 7.493498 | 3.076292 P | P | P | P | 7.339852 |
| 9.336428 | 9.330568 | 8.858907 | 8.350104 P | P | P | P | 8.993253 |
| 6.835361 | 7.848954 | 7.544847 | 5.474308 P | P | P | P | 7.247207 |
| 8.168575 | 7.330812 | 7.182225 | 7.455981 P | P | P | P | 7.432239 |
| 6.262899 |          | 6.566547 | 8.079869 A |   | P | A | 5.622393 |
| 5.724009 | 5.379117 | 5.916729 | 6.94237 A  | P | P | P | 4.569871 |
| 7.311443 | 7.040979 | 5.787491 | P          | P | P |   | 7.703543 |
| 8.588407 | 7.678067 | 8.076094 | 7.841965 P | P | P | P | 7.478347 |

|          |          |          |          |   |   |   |   |          |
|----------|----------|----------|----------|---|---|---|---|----------|
| 6.247466 | 6.330372 | 5.040639 | 5.440514 | A | P | P | P | 5.527548 |
| 8.364732 | 8.309725 | 8.077292 | 8.038733 | P | P | P | P | 8.059525 |
| 6.938401 |          |          |          | A |   |   |   | 5.283251 |
| 7.741211 | 8.336004 |          | 7.98934  | P | P |   | P | 8.918442 |
| 5.91369  | 2.3819   | 4.248189 |          | P | P | P |   | 6.192389 |
| 11.92594 | 12.01562 | 9.707694 | 10.85277 | P | P | P | P | 11.8552  |
| 6.701349 | 6.187635 | 7.744189 | 7.96974  | P | A | A | A | 5.785501 |
| 9.256979 | 9.104013 | 8.254519 | 6.221832 | P | P | P | P | 8.522482 |
| 7.173476 | 7.053947 | 6.30921  | 6.704518 | A | P | P | M | 7.371743 |
|          | 5.541119 | 6.339746 |          |   | M | P |   |          |
| 6.509265 | 6.654918 | 6.652286 | 7.43195  | P | P | P | P | 7.519635 |
| 8.365448 | 8.872966 | 9.128654 | 9.422098 | P | P | P | P | 8.620261 |
| 6.199148 | 7.096995 | 9.701512 | 8.49091  | P | A | P | A | 5.930496 |
| 4.857049 | 6.266378 | 4.685484 |          | P | P | M |   | 6.294746 |
| 7.337807 | 6.22791  | 6.764486 | 4.520558 | P | P | P | P | 7.183234 |
| 8.976557 | 9.990247 | 9.352121 | 8.620825 | P | P | P | P | 9.500452 |
| 7.108844 | 8.437052 | 6.615533 | 7.741196 | P | P | P | P | 6.700552 |
| 11.65296 | 11.75629 | 10.48938 | 10.04079 | P | P | P | P | 11.22065 |
| 5.75759  |          |          | 6.255962 | A |   |   | A | 5.989045 |
|          |          | 6.915576 |          |   |   | A |   |          |
| 9.746136 | 8.917697 | 8.499194 | 8.333812 | P | P | P | P | 8.583325 |
| 6.443058 |          | 6.44851  | 6.86542  | A |   | A | A | 4.180931 |
| 6.063341 |          |          | 7.480875 | A |   |   | P | 6.586072 |
| 10.55464 | 9.747097 | 10.01654 | 11.9709  | P | P | P | P | 10.88781 |
| 7.301585 | 6.917362 | 7.421133 | 7.784291 | P | A | A | P | 6.360048 |
|          | 6.331177 | 6.671502 | 1.124514 |   | P | P | P |          |
|          | 8.091491 | 7.573443 | 8.448851 |   | M | P | M |          |
|          |          | 2.395834 |          |   |   | M |   |          |
|          | 4.622807 |          | 3.826524 |   | A |   | M |          |
|          | 5.013786 | 3.039629 |          |   | A | P |   |          |
|          |          | 6.142297 |          |   |   | A |   |          |
| 9.185185 | 8.610283 | 10.4623  | 8.335478 | P | P | P | P | 7.524449 |
| 6.439784 | 5.797926 | 4.607116 | 4.192129 | P | A | P | P | 5.654874 |
|          | 6.105925 | 8.80243  | 7.572336 |   | A | A | A |          |
| 4.666521 |          |          |          | P |   |   |   | 5.75991  |
| 8.892204 | 9.328338 | 8.172969 | 8.227455 | P | P | P | P | 8.849994 |
| 6.038139 | 6.119931 | 6.935416 | 7.22811  | M | P | P | P | 6.386837 |
| 9.017358 | 9.293514 | 8.504975 | 9.1104   | P | P | P | P | 9.186473 |
| 9.681629 | 9.404616 | 8.868403 | 8.084123 | P | P | P | P | 8.65968  |
|          | 5.693417 | 5.779275 |          | P | P |   |   |          |

|          |          |          |          |   |   |   |   |          |
|----------|----------|----------|----------|---|---|---|---|----------|
| 8.14198  | 6.741876 | 7.99706  | 8.312416 | A | A | M | A | 3.982044 |
|          |          | 6.799521 | 7.444293 |   |   | A | P |          |
| 6.08888  | 6.50996  | 6.38374  | A        | A | A |   |   | 2.765941 |
| 5.93467  | 5.387444 | 4.143812 | 5.705552 | A | A | P | A | 4.744469 |
| 4.883988 | 6.138943 |          | 6.774994 | P | P |   | A | 6.981113 |
|          | 5.694398 | 5.249255 | 6.797654 | A | P |   | P |          |
| 2.725045 |          |          | 5.424764 | P |   |   | P | 5.949288 |
| 7.569488 | 6.567277 | 6.790422 | P        | P | P |   |   | 6.566393 |
| 7.855735 | 6.283618 | 9.118526 | 9.478638 | P | P |   | P | 7.04366  |
| 6.382624 | 4.087382 | 8.192254 | 7.863885 | M | P |   | P | 5.635507 |
| 6.084321 | 5.962315 | 6.650925 | 7.537607 | P | P |   | P | 6.624647 |
| 5.91059  | 5.999543 | 5.534334 | P        | P | A |   |   | 6.597928 |
| 0.255853 |          |          | P        |   |   |   |   | 5.882316 |
| 6.676136 | 6.763613 | 5.621966 | 1.080323 | P | A | P | P | 6.563132 |
| 8.23524  | 9.508016 | 9.159063 | 8.228186 | P | P | P | P | 8.953446 |
|          | 6.674759 |          |          | A |   |   |   |          |
|          | 2.206092 |          |          | P |   |   |   |          |
| 8.148399 | 7.687579 | 7.424328 | A        | P | P |   |   | 5.849754 |
| 6.49597  | 4.667971 | 6.107648 | P        | P | P |   |   | 6.757507 |
| 8.877765 | 8.709505 | 9.508726 | 9.159155 | P | P |   | P | 8.179274 |
| 6.567763 |          | 6.54184  | 7.136901 | A |   | P | P | 6.966221 |
|          | 4.103145 | 5.888917 | 5.151968 |   | P | P | M |          |
| 7.797192 | 7.71595  | 7.1836   | 7.488698 | A | P | P | M | 7.275107 |
| 7.59911  | 7.674372 | 8.426174 | 9.223518 | A | A | A | A | 7.711017 |
|          | 3.425641 |          |          | P |   |   |   |          |
| 8.131819 | 8.62715  | 8.439338 | 8.874839 | P | P | P | A | 7.967679 |
| 5.413483 |          |          | 7.488009 | M |   |   | A | 6.773334 |
| 6.710534 | 6.875789 | 6.731288 | 7.717156 | P | P | P | M | 6.665277 |
| 5.902932 |          | 5.896649 | A        |   |   | P |   | 4.665831 |
| 7.155328 | 6.799237 | 6.931219 | 5.368001 | P | P | P | P | 6.322591 |
| 9.097704 | 9.943021 | 8.918459 | 8.20615  | P | P | P | P | 9.186761 |
|          | 3.883401 |          |          | P |   |   |   |          |
| 8.05138  | 8.060627 | 8.39507  | 8.925035 | P | P | P | M | 8.425868 |
| 5.528679 | 4.545679 | 6.231642 | 6.750342 | A | P | P | A | 5.85505  |
|          |          | 2.253907 |          |   |   | P |   |          |
|          | 6.161029 | 6.595465 | 6.863164 | A | M |   | A |          |
|          |          |          | 7.127395 |   |   |   | A |          |
| 5.885923 | 5.286638 | 6.676246 | A        | A | A |   |   | 4.968809 |
| 5.266919 | 5.189824 | 5.083821 | A        | P | P |   |   | 5.093113 |
| 5.113488 | 5.618088 | 5.946932 | P        | A | P |   |   | 6.199148 |

|          |          |          |          |   |   |   |   |          |
|----------|----------|----------|----------|---|---|---|---|----------|
| 6.119418 | 6.269533 |          | 6.777594 | A | P |   | P | 5.30793  |
| 5.735062 | 5.436944 | 5.994695 | 7.508922 | P | P | A | P | 6.50261  |
| 6.563591 |          |          | 4.364996 | A |   |   | P | 7.12522  |
| 7.283628 | 7.856873 | 6.555609 | 7.217847 | P | P | P | P | 7.362759 |
| 6.438855 |          | 6.088679 | 7.533952 | A |   | A | A | 6.590522 |
|          |          | 3.793581 | 1.687358 |   |   | P | P |          |
| 6.605953 | 7.173228 | 3.679096 |          | P | P | P |   | 6.78361  |
| 4.819028 |          | 5.34153  |          | A |   | P |   | 4.992861 |
| 5.882445 |          |          | 4.753029 | P |   |   | P | 5.518765 |
| 7.437529 | 7.919565 | 6.969594 | 6.316205 | P | P | P | P | 7.223553 |
| 6.790457 | 6.982377 | 7.241422 | 7.767763 | P | P | P | A | 7.002753 |
| 6.897684 | 7.292954 | 5.697135 |          | A | A | P |   | 7.073987 |
| 5.931021 |          | 7.938505 | 7.891513 | A |   | A | A | 5.268798 |
| 6.067552 | 5.705173 | 5.784348 | 6.675879 | P | A | A | A | 6.747385 |
| 5.154884 | 6.664094 | 5.428981 |          | P | P | M |   | 5.558505 |
| 6.079134 | 6.871366 | 5.511211 | 7.032974 | P | P | P | P | 7.402497 |
| 6.229816 | 5.99688  | 6.531833 | 7.706113 | P | P | A | P | 6.618866 |
| 6.623954 | 6.860414 | 4.389118 | 6.855877 | A | P | P | P | 6.090983 |
| 9.150224 | 8.320581 | 8.685099 | 8.486349 | P | P | P | P | 7.896197 |
| 4.937098 | 4.896346 | 4.445785 | 6.134646 | A | A | P | M | 5.31321  |
| 7.259318 | 6.92709  | 8.743765 | 8.497851 | P | P | P | P | 7.20885  |
|          |          |          | 6.390842 |   |   |   | A |          |
| 5.940791 |          | 7.020169 |          | P |   | M |   | 7.341772 |
|          |          | 3.523349 |          |   |   | P |   |          |
| 7.132412 | 6.391258 | 5.274879 | 6.662977 | A | P | P | P | 6.643103 |
| 6.900412 | 6.344975 | 7.362548 | 7.725996 | A | P | P | P | 6.806181 |
| 6.628865 |          |          |          | A |   |   |   | 5.591284 |
| 7.10764  |          | 7.161558 |          | A |   | A |   | 5.253755 |
| 6.030228 | 5.859026 | 6.987467 | 8.089602 | P | P | P | P | 7.165927 |
| 6.21205  | 4.655658 | 5.273447 | 6.267611 | P | P | P | P | 6.768339 |
| 9.189453 | 8.356633 | 8.083096 | 7.595573 | P | P | P | P | 8.484498 |
|          | 4.107418 |          |          |   | P |   |   |          |
| 7.531046 | 7.806245 | 7.674016 | 7.853787 | A | P | P | A | 7.469212 |
|          |          | 5.023144 |          |   |   | P |   |          |
| 7.400788 | 8.014713 | 6.292093 | 4.67961  | P | P | P | P | 7.466257 |
| 7.144987 | 7.067941 | 6.301331 | 4.096954 | P | P | P | P | 6.651975 |
| 7.050886 | 6.636144 | 5.777531 | 2.300361 | P | P | P | P | 6.504058 |
| 8.468328 | 8.791176 | 8.162618 | 7.178368 | P | P | P | P | 8.662608 |
| 8.337579 | 7.545435 | 6.825888 | 6.641997 | P | P | P | P | 7.178966 |
|          | 4.937329 | 5.507191 | 6.95763  |   | P | A | A |          |

|          |          |          |            |   |   |   |          |
|----------|----------|----------|------------|---|---|---|----------|
|          | 5.186172 | 5.767173 | 6.579837   | P | A | A |          |
| 6.483532 | 6.742634 | 5.75155  | 6.249014 P | P | P | P | 6.628619 |
| 7.437743 | 7.715362 | 6.852987 | 6.929079 P | A | P | P | 7.555153 |
| 6.001644 | 5.290005 | 4.919859 | A          | P | P |   | 6.074169 |
| 6.944673 | 6.749281 | 7.111135 | 7.12481 P  | P | P | P | 7.311723 |
| 6.714832 | 7.027152 | 6.10345  | P          | P | M |   | 7.073103 |
| 5.796203 | 5.529459 | 5.154254 | P          | P | P |   | 6.297456 |
| 9.678869 | 9.676613 | 9.122939 | 8.520502 P | P | P | P | 9.428135 |
| 6.340694 | 3.922291 |          | A          | P |   |   | 6.317143 |
| 8.062636 | 7.945799 | 7.875016 | 7.034023 P | P | P | P | 6.574606 |
| 3.757299 |          |          | 6.880001 P |   |   | A | 6.362497 |
| 6.653981 | 5.320421 | 4.803559 | A          | M | P |   | 6.353813 |
| 7.249851 | 7.400295 | 6.699306 | 6.364038 M | P | P | P | 6.222888 |
|          |          | 6.103402 | 4.690452   |   | A | M |          |
| 6.835928 |          | 6.105146 | 7.615928 P |   | M | P | 7.695254 |
| 8.639794 | 8.245307 | 8.744771 | 9.247686 P | P | P | P | 8.191008 |
| 6.327033 | 6.475453 | 6.715961 | 6.957508 P | P | P | P | 5.788301 |
| 8.641622 | 8.053134 | 6.798122 | 6.268745 P | P | P | P | 7.89771  |
| 6.49952  | 7.156341 |          | 7.174597 A | A |   | P | 7.528561 |
|          |          |          | 7.037993   |   |   | A |          |
| 1.668444 |          |          | M          |   |   |   | 5.85242  |
| 6.905463 | 7.782832 | 8.366417 | 8.234235 P | P | P | P | 7.981161 |
|          |          |          | 7.249981   |   |   | M |          |
|          | 6.136366 | 6.667434 |            | M | A |   |          |
| 8.763347 | 9.453166 | 9.502848 | 10.7632 P  | P | P | P | 9.333247 |
| 5.033646 | 0.922992 |          | P          | M |   |   | 6.453863 |
|          | 6.852338 | 2.496837 | 5.228465   | A | P | P |          |
| 10.49554 | 10.96781 | 9.902483 | 9.867036 P | P | P | P | 10.8262  |
| 5.879643 | 5.791159 |          | 6.75674 M  | P |   | P | 6.367252 |
| 7.304388 | 6.227454 | 5.792238 | P          | P | P |   | 6.530333 |
| 6.336111 |          |          | 7.540921 A |   |   | A | 5.971269 |
|          | 7.35464  |          |            | A |   |   |          |
| 7.093043 | 7.552215 | 7.131368 | 6.784023 P | P | P | A | 6.663508 |
| 4.95172  | 6.170962 | 4.86358  | 1.753568 M | A | P | P | 6.52972  |
|          | 7.014206 | 6.262101 |            | A | P |   |          |
|          | 7.551715 | 8.485892 | 8.428185   | A | A | A |          |
|          |          | 7.253141 |            |   | A |   |          |
| 6.230394 |          |          | A          |   |   |   | 1.60144  |
|          | 5.86897  |          |            | A |   |   |          |
|          | 2.153611 |          |            | M |   |   |          |



|          |          |          |            |   |   |   |          |
|----------|----------|----------|------------|---|---|---|----------|
| 5.225881 | 5.645119 | 6.197499 | P          | P | M |   | 6.818467 |
|          |          | 3.557062 |            |   | P |   |          |
| 5.787508 | 7.007029 | 0.63048  | 6.502708 P | P | M | P | 6.189383 |
|          | 4.868716 |          |            | M |   |   |          |
| 7.964821 | 6.806655 | 7.308551 | 7.154417 P | P | P | P | 6.611641 |
| 7.768914 | 8.267495 | 7.873241 | 7.215308 P | P | P | P | 7.388603 |
|          | 6.424205 | 5.584568 | 5.959749   | A | P | P |          |
| 5.253724 | 5.508676 | 2.332181 | 6.262514 P | A | P | P | 5.519431 |
| 5.018918 | 5.844402 | 5.557906 | A          | A | M |   | 5.724795 |
| 7.427982 | 7.345837 | 7.546545 | 6.772466 P | P | P | P | 7.264041 |
| 7.258077 | 6.875815 | 4.312795 | 7.547947 A | P | P | P | 6.268486 |
| 5.29086  | 5.543694 | 6.067088 | 7.599493 A | M | A | P | 5.909444 |
| 7.89905  | 8.590047 | 6.846231 | 7.318737 P | P | P | P | 8.575871 |
| 4.421156 |          |          | P          |   |   |   | 6.193082 |
| 7.514782 | 7.505357 | 8.388203 | 8.341892 A | P | P | P | 7.142753 |
| 6.7984   | 4.159914 |          | A          | P |   |   | 6.052278 |
| 7.568991 | 7.278379 | 7.215914 | 3.736733 P | P | P | P | 6.968572 |
| 6.788588 | 6.584017 | 7.300959 | 8.077906 P | M | A | A | 6.417057 |
| 5.929839 | 5.041013 | 6.602627 | 6.358062 M | P | A | P | 6.396466 |
| 5.473325 | 5.493835 |          | P          | A |   |   | 5.726172 |
|          | 4.763847 |          |            | P |   |   |          |
|          |          | 6.522121 |            |   |   | A |          |
| 5.961114 | 6.921837 | 3.311624 | 7.011797 P | P | P | P | 6.918108 |
| 8.29343  | 8.512342 | 7.765697 | 7.122999 P | P | P | P | 8.292499 |
| 6.077262 | 4.547884 | 7.201704 | 5.671917 P | P | P | P | 6.829958 |
| 6.150957 | 6.481939 |          | 7.616363 M | A |   | A | 6.792876 |
| 5.96936  | 6.229361 |          | 4.551384 A | P |   | P | 5.547744 |
| 5.673179 |          | 6.28317  | 6.990859 P |   | A | P | 6.077707 |
| 7.046056 | 6.693354 | 7.361132 | 7.65037 P  | P | P | A | 6.991775 |
|          |          | 5.539138 | 6.655627   |   | P | P |          |
|          |          | 4.072949 |            |   | P |   |          |
| 1.06073  | 5.812017 | 5.870516 | M          | P | P |   | 6.62778  |
| 8.444146 | 7.471198 | 8.64487  | 9.233923 P | P | P | M | 7.746277 |
| 5.531647 | 6.498997 | 6.235766 | P          | P | P |   | 5.799082 |
|          |          | 6.005579 | 7.455988   |   | A | A |          |
|          | 6.217832 | 6.778318 | 5.870378   | M | P | P |          |
| 6.877504 | 7.212436 | 7.627472 | 8.093111 A | P | P | A | 6.934314 |
|          | 6.052239 | 4.963527 | 6.717867   | A | P | P |          |
|          |          | 2.445065 |            |   |   | P |          |
| 7.810191 | 6.835905 | 6.45201  | 7.497711 A | P | P | A | 6.106224 |

|          |          |          |          |   |   |   |          |
|----------|----------|----------|----------|---|---|---|----------|
| 7.514151 | 7.564589 | 6.461114 | 5.549697 | P | P | P | 7.016475 |
|          | 4.563259 | 5.904488 |          | P | P |   |          |
| 6.586762 | 6.469309 | 5.021105 | 6.869026 | A | P | P | 6.464344 |
| 6.262285 | 5.302509 | 3.956859 | 6.354788 | A | P | P | 6.460272 |
| 7.035273 | 5.983025 | 7.567165 | 6.604422 | P | P | P | 6.065157 |
| 7.37062  | 6.435853 | 6.75224  | 8.361797 | P | P | P | 7.149645 |
| 6.177042 | 6.363006 |          | P        | M |   |   | 6.641874 |
| 9.695909 | 9.724731 | 10.63754 | 10.56312 | P | P | P | 9.743956 |
|          |          | 7.846439 |          |   | A |   |          |
| 6.96289  | 6.278005 | 7.372657 | 6.146775 | P | A | P | 6.302791 |
|          |          | 5.992923 |          |   | A |   |          |
| 6.044269 | 5.743929 | 6.889029 | P        | P | P |   | 6.081731 |
|          | 7.094754 | 3.412584 |          | A | P |   |          |
| 7.410602 | 7.685135 | 5.800972 | 7.063862 | M | P | M | 7.527677 |
| 8.200333 | 8.122808 | 3.061628 | 6.841925 | P | P | P | 8.102181 |
| 6.388845 | 5.459866 | 6.388716 | 6.320153 | P | M | A | 5.67246  |
| 10.4622  | 10.21482 | 9.652641 | 8.810938 | P | P | P | 10.10162 |
|          | 6.462624 | 8.009246 | 7.713007 | A | A | A |          |
| 6.724443 | 5.165711 |          | 6.66112  | P |   | A | 6.262781 |
| 5.954895 | 5.288553 | 5.077636 | A        | A | A |   | 5.57524  |
| 9.396999 | 9.285026 | 8.055521 | 7.603381 | P | P | P | 9.352098 |
| 8.63997  | 8.380059 | 7.696019 | 7.349918 | P | P | P | 7.757873 |
| 9.484418 | 9.412313 | 5.481846 | 8.448402 | P | P | P | 10.21431 |
| 7.773553 | 7.764535 | 6.168571 | 7.102129 | P | P | P | 7.818645 |
| 10.13728 | 11.40456 | 4.362376 | 6.514532 | P | P | P | 10.29644 |
|          |          |          | 6.278668 |   |   | A |          |
| 5.101923 |          |          | A        |   |   |   | 6.170149 |
| 5.024044 | 5.506063 |          | A        | P |   |   | 3.86534  |
|          | 5.235902 |          |          | A |   |   |          |
| 6.210868 | 6.54569  | 6.128691 | 7.267547 | P | P | A | 7.084611 |
| 6.417224 | 5.638325 | 5.673072 | 5.047055 | P | P | P | 5.346287 |
| 5.862133 | 5.423917 | 7.008871 | 7.301327 | P | A | A | 5.79112  |
| 6.743957 | 6.604799 | 6.236323 | P        | P | P |   | 6.813508 |
| 5.359953 | 5.685814 |          | 4.875234 | A |   | P | 2.999742 |
| 6.761371 |          | 5.803785 | A        |   | P |   | 3.069418 |
| 5.997392 | 4.358165 |          | P        | P |   |   | 5.618507 |
|          | 7.210236 | 8.14369  | 7.872979 | A | A | A |          |
| 4.92761  |          | 6.304082 | P        |   | A |   | 5.999675 |
| 8.5135   | 9.314878 | 8.591362 | 6.240379 | P | P | P | 8.106504 |
| 7.014447 | 7.162499 | 5.705181 | 6.207006 | P | P | P | 6.426164 |

|          |          |          |          |   |   |   |          |
|----------|----------|----------|----------|---|---|---|----------|
| 7.945317 | 8.104269 | 6.541245 | 7.016708 | P | P | P | 7.990379 |
| 5.638741 | 4.776673 | 4.191011 | 5.52559  | P | M | P | 5.967182 |
| 7.357216 | 7.289277 | 6.825901 | 5.332655 | P | P | P | 7.018584 |
| 6.271923 | 4.477024 | 4.916553 | 6.013331 | P | P | M | 5.103371 |
|          |          | 5.69066  |          |   | A |   |          |
| 4.164555 |          |          | P        |   |   |   | 6.627049 |
| 6.052929 | 4.82861  | 6.287502 | 7.204452 | P | P | P | 6.334718 |
| 8.687027 | 8.769222 | 8.692847 | 7.899366 | P | P | P | 8.735983 |
| 7.643131 | 6.541628 | 7.858173 | 6.808456 | M | A | P | 6.119113 |
|          |          | 6.635523 |          |   |   | M |          |
| 7.496934 | 7.883986 | 6.397107 | 5.039024 | P | P | P | 6.541166 |
|          | 6.587105 | 4.498049 |          | A | P |   |          |
|          |          | 7.558275 | 7.26569  |   | A | P |          |
| 7.326669 | 7.597343 | 6.664389 | P        | A | P |   | 7.517458 |
| 6.749749 | 7.420612 | 6.75425  | 6.962051 | A | P | P | 5.19019  |
| 4.164276 | 5.864161 | 6.604197 | 4.380955 | P | A | P | 6.316979 |
| 8.259846 | 6.812055 | 6.483672 | 7.183025 | A | P | M | 6.333449 |
| 7.567471 | 7.249895 | 8.15204  | 9.517655 | P | M | P | 8.815772 |
| 4.674504 | 6.098415 | 4.008028 | 6.416402 | A | P | P | 4.516957 |
|          | 5.243532 |          |          | P |   |   |          |
|          | 4.228183 |          | 6.682673 | M |   | A |          |
| 9.242821 | 9.816148 | 8.024634 | 8.399319 | P | P | P | 10.35745 |
| 5.869176 | 5.587525 | 6.084694 | 1.688208 | A | P | P | 5.824781 |
| 8.010504 | 7.015174 | 6.585977 | 6.264529 | P | P | P | 6.825539 |
| 7.162218 | 7.742885 | 6.158829 | 6.656384 | M | P | P | 5.686813 |
| 5.985711 |          | 5.782641 | A        |   | M |   | 3.917849 |
| 5.306086 | 4.072249 | 5.398333 | P        | P | P |   | 5.464175 |
| 7.522731 | 7.286193 | 6.910458 | 6.998903 | P | P | P | 7.683864 |
| 7.24601  | 7.428279 | 6.134598 | 5.566963 | M | P | P | 7.552428 |
| 6.781954 | 6.341671 | 6.397128 | A        | P | P |   | 5.503896 |
| 5.941122 |          | 1.973996 | 6.699147 | A | P | P | 5.636897 |
| 8.256986 | 8.15446  | 6.52428  | 6.519596 | P | P | P | 7.755955 |
| 7.887114 |          | 9.019295 | 9.824782 | A | A | A | 8.073042 |
| 6.224469 |          | 5.001442 | P        |   | P |   | 6.828697 |
| 6.515349 |          | 7.664618 | P        |   | A |   | 6.934326 |
| 7.574454 | 7.510701 | 6.299861 | 7.15134  | P | P | P | 7.942231 |
| 8.076836 | 8.149317 | 7.052903 | 6.99692  | P | P | P | 7.829234 |
|          | 5.636771 |          | 4.569619 | A |   | P |          |
| 5.61491  | 5.48285  |          | 7.529108 | M | A | A | 6.362579 |
| 6.484994 | 6.734942 | 2.323339 | A        | P | P |   | 6.660667 |

|          |          |          |          |   |   |   |   |          |
|----------|----------|----------|----------|---|---|---|---|----------|
| 7.462905 | 7.991646 | 7.543502 | 6.528913 | A | P | P | P | 5.656128 |
| 8.338634 | 7.899598 | 8.211873 | 7.095744 | P | P | P | P | 7.761261 |
| 5.595798 | 3.971858 | 5.175003 | 5.862862 | P | A | P | P | 5.180601 |
|          | 3.780037 |          |          |   | P |   |   |          |
| 6.960902 | 6.576571 | 6.613898 |          | P | P | P |   | 7.596463 |
| 8.766287 | 9.074654 | 6.713999 | 7.386735 | P | P | P | P | 8.974251 |
| 7.262046 | 8.060575 | 7.733294 | 7.389842 | P | P | P | P | 8.614464 |
|          | 4.348002 |          | 6.587648 | M |   |   | P |          |
|          | 4.594286 |          |          | A |   |   |   |          |
|          | 2.650773 |          | 6.641913 | P |   |   | A |          |
|          |          | 5.881184 |          |   |   | A |   |          |
| 3.265796 |          |          |          | M |   |   |   | 5.888956 |
| 6.642031 | 6.55819  |          | 7.279314 | A | P |   | P | 6.887344 |
| 5.585359 | 7.046429 | 5.184783 | 6.457805 | A | P | P | P | 5.294699 |
| 5.870809 | 5.394111 | 2.4536   |          | A | P | P |   | 5.728682 |
| 9.130139 | 8.260418 | 9.293714 | 10.64976 | P | P | A | P | 9.224744 |
| 6.816468 | 6.694677 | 6.518606 | 7.153091 | A | P | P | A | 5.712722 |
| 7.474345 | 6.835375 | 8.109373 | 8.140016 | A | A | P | A | 6.720733 |
|          | 7.723057 | 7.78716  |          |   | P | A |   |          |
|          | 4.421149 | 0.809081 |          |   | P | P |   |          |
| 7.649591 | 8.232621 | 7.43661  | 7.462659 | P | P | P | P | 7.554742 |
| 5.22557  |          |          |          | P |   |   |   | 6.551555 |
| 6.802331 | 7.29434  | 6.728304 |          | A | A | M |   | 7.036934 |
| 5.902225 | 5.440087 | 5.295126 | 5.23467  | P | P | P | P | 6.505058 |
|          | 4.133344 |          |          |   | P |   |   |          |
| 6.151101 | 5.967416 | 6.305963 | 7.379624 | A | A | P | M | 6.378394 |
| 5.511195 | 6.119921 | 5.784888 |          | A | A | P |   | 5.178119 |
| 9.452556 | 9.149021 | 9.73566  | 11.62977 | P | P | P | P | 10.42372 |
| 7.314957 | 6.316025 | 4.659335 | 6.585379 | P | P | P | P | 6.72853  |
| 7.617641 | 8.496539 | 6.987367 | 7.478488 | P | P | P | P | 7.858582 |
|          | 5.864131 | 5.528802 | 6.010146 |   | P | P | P |          |
| 5.253481 | 5.874571 | 5.886574 |          | P | M | M |   | 6.357674 |
| 12.16297 | 12.75424 | 11.88193 | 11.29158 | P | P | P | P | 12.48593 |
| 4.469551 |          |          |          | M |   |   |   | 5.908147 |
| 10.47928 | 10.37887 | 11.33738 | 12.67606 | P | P | P | P | 10.61945 |
| 10.57915 | 10.3394  | 11.33139 | 12.57972 | P | P | P | P | 10.45453 |
|          | 7.898975 | 6.859529 |          |   | P | P |   |          |
|          |          |          | 6.387655 |   |   |   | A |          |
|          | 4.976048 |          |          |   | A |   |   |          |
| 5.717247 | 5.73338  | 4.499601 | 2.283602 | P | A | P | P | 6.044964 |

|          |          |          |            |   |   |   |          |
|----------|----------|----------|------------|---|---|---|----------|
|          | 7.481833 |          |            | A |   |   |          |
|          |          |          | 6.405314   |   |   | A |          |
| 4.263281 | 3.116548 | 5.560365 | A          | P | A |   | 4.623331 |
| 7.931549 | 8.355606 | 9.585179 | 8.09368 A  | A | P | A | 5.645845 |
|          | 5.656996 |          |            | A |   |   |          |
|          |          | 2.037928 | 6.466757   |   | P | A |          |
| 6.670446 | 5.080474 | 3.219164 | 6.613669 A | P | P | P | 5.634668 |
|          |          |          | 6.030797   |   |   | A |          |
| 8.100424 | 8.561582 | 9.678248 | 9.274406 P | P | P | P | 7.91858  |
| 7.941688 | 7.685244 | 7.044515 | 8.537897 P | P | P | A | 8.293406 |
|          |          | 3.591344 |            |   | P |   |          |
|          |          | 4.143859 | 6.203487   |   | P | A |          |
| 5.403381 |          |          | 2.653815 A |   |   | P | 3.706081 |
|          | 1.617889 |          |            | P |   |   |          |
| 8.721779 | 7.979276 | 7.994204 | 7.130104 P | P | P | P | 7.494223 |
| 10.28687 | 10.28593 | 9.68515  | 9.559419 P | P | P | P | 9.95637  |
|          | 5.485758 | 5.052059 | 6.253906   | P | M | A |          |
| 6.243703 |          | 5.693571 | 6.51536 A  |   | P | P | 6.932325 |
|          |          | 6.511076 | 6.364629   |   | A | M |          |
| 4.772846 | 5.795388 |          | P          | A |   |   | 5.858958 |
| 6.621717 | 6.822321 | 6.794499 | P          | P | P |   | 7.654805 |
| 9.111321 | 9.596663 | 8.647051 | 10.49897 P | P | P | P | 9.910883 |
| 8.88039  | 10.16374 | 9.15901  | 9.082285 P | P | P | P | 9.63225  |
| 5.929355 | 6.060963 | 5.371872 | 2.392508 P | M | P | P | 6.091769 |
|          | 1.506382 |          |            | P |   |   |          |
| 6.559129 | 6.655969 | 7.177953 | 6.295471 P | P | P | P | 7.255171 |
| 10.44703 | 11.0313  | 10.11057 | 9.588779 P | P | P | P | 10.20967 |
| 9.89787  | 10.08649 | 9.146421 | 8.509333 P | P | P | P | 8.873274 |
|          |          |          | 6.511356   |   |   | A |          |
| 9.244505 | 9.345923 | 9.036368 | 9.02931 P  | P | P | P | 9.571419 |
| 6.409495 | 6.744027 | 6.760638 | 6.856123 P | P | P | P | 5.01983  |
| 6.514703 | 6.526347 | 6.406372 | 7.742941 P | A | P | P | 7.587924 |
| 8.440283 | 8.849386 | 8.33693  | 7.153804 P | P | P | P | 8.508994 |
| 8.85007  | 7.855506 | 5.878853 | 6.374264 P | P | P | P | 7.218918 |
| 5.045567 | 4.421731 |          | P          | P |   |   | 6.94069  |
| 5.379981 | 7.121683 | 5.339236 | P          | P | P |   | 8.786886 |
|          |          | 4.281734 |            |   | P |   |          |
| 5.965283 | 5.780109 |          | A          | A |   |   | 4.465352 |
| 6.536303 |          |          | A          |   |   |   | 5.313176 |
| 6.440635 | 7.687089 | 6.398139 | 6.397607 P | P | P | P | 6.930327 |

|          |          |          |            |   |   |   |          |
|----------|----------|----------|------------|---|---|---|----------|
| 2.34036  |          |          | M          |   |   |   | 5.708195 |
| 7.981857 | 8.278227 | 8.136086 | 8.259286 P | P | P | A | 7.704175 |
| 7.286657 | 7.234059 | 5.76119  | 5.625985 P | P | P | P | 6.853143 |
| 5.962741 | 5.766766 | 5.330481 | P          | P | P |   | 6.298763 |
| 8.378606 | 8.693994 | 7.943859 | 8.306912 P | P | P | P | 8.504997 |
|          | 2.194002 |          |            | P |   |   |          |
|          | 5.45473  |          |            | A |   |   |          |
| 8.501035 | 8.753939 | 9.109899 | 10.64251 P | P | P | P | 9.676193 |
| 6.871511 | 6.45736  | 6.975054 | 7.19111 P  | P | P | P | 7.035214 |
| 4.609029 | 4.725915 | 5.771963 | P          | P | P |   | 6.009248 |
| 5.993121 | 6.839886 | 6.020664 | 7.276039 P | A | P | P | 6.786334 |
| 4.912459 | 5.098024 | 4.190494 | 6.536616 A | P | P | P | 5.225973 |
| 11.1946  | 10.49395 | 11.36104 | 12.66639 P | P | P | P | 12.24993 |
|          | 6.229144 | 0.978088 |            | P | P |   |          |
| 6.838188 | 7.497278 | 8.282402 | A          | A | P |   | 7.061262 |
|          | 3.052832 |          |            | P |   |   |          |
| 7.491142 | 7.789744 | 7.383976 | 6.487582 P | P | P | P | 6.849614 |
| 4.796465 |          |          | 6.841056 P |   |   | A | 5.352216 |
| 7.570431 | 8.224718 | 7.774659 | 7.980858 P | P | P | P | 8.165882 |
| 9.441375 | 9.56454  | 9.073114 | A          | P | P |   | 9.370683 |
|          | 5.35181  |          |            | A |   |   |          |
| 6.925452 | 7.387948 | 5.843581 | 4.90219 P  | M | P | M | 6.214153 |
| 6.817856 | 5.311786 |          | 6.661605 A | P |   | A | 6.043805 |
| 8.057349 |          | 8.194736 | A          |   | P |   | 6.946974 |
| 5.223129 | 5.869788 | 6.173065 | 5.287186 P | P | P | P | 6.323707 |
|          |          |          | 6.12949    |   |   | A |          |
| 6.339119 | 5.705537 | 6.362852 | 6.477266 A | A | P | P | 4.448385 |
|          |          | 6.328792 |            |   | A |   |          |
|          | 5.361181 | 0.770841 |            | A | P |   |          |
| 6.213143 | 5.154074 | 5.605627 | 6.315936 A | P | P | A | 5.853222 |
| 6.264868 | 5.851051 | 5.198497 | 7.255332 P | P | P | P | 6.497272 |
|          |          |          | 7.846658   |   |   | A |          |
| 6.83303  | 5.884069 | 5.968246 | A          | A | P |   | 6.445153 |
|          |          | 5.873693 | 6.399565   |   | P | P |          |
| 8.602487 | 7.906767 | 8.667116 | 6.882174 P | P | P | P | 7.906638 |
| 4.989623 | 5.083642 | 6.487075 | 6.119916 P | P | P | P | 6.976135 |
| 7.286748 | 7.511514 | 8.293828 | 8.260182 P | P | P | P | 7.503484 |
| 5.955146 | 6.38417  | 4.25127  | 4.997726 A | P | P | P | 5.713616 |
| 8.245857 | 8.353977 | 7.495392 | 7.395937 P | P | P | P | 7.600055 |
|          |          | 2.441896 | 6.286433   |   | P | A |          |

|          |          |          |            |   |   |   |          |
|----------|----------|----------|------------|---|---|---|----------|
|          |          | 6.270355 |            |   |   | A |          |
| 5.541906 |          |          | A          |   |   |   | 2.709463 |
| 4.06884  |          | 4.442471 | 5.33538 P  |   | P | P | 5.346529 |
| 6.751376 |          | 7.49342  | 7.661215 A |   | P | A | 6.871121 |
| 5.622701 | 6.427184 | 6.386182 | 6.885413 A | P | A | P | 3.786308 |
|          |          | 3.400662 |            |   | P |   |          |
| 6.226429 |          | 6.878575 | A          |   | P |   | 7.415669 |
| 6.249673 | 6.589284 | 4.459802 | 0.754406 P | P | P | P | 5.766737 |
| 7.229928 | 6.931624 | 6.936179 | 6.423783 P | P | P | P | 7.087979 |
| 6.19988  | 5.288078 |          | A          | A |   |   | 1.918732 |
| 8.835722 | 8.568662 | 11.01355 | 11.46271 P | P | P | P | 7.929996 |
|          |          | 6.617866 |            |   |   | A |          |
| 5.001937 |          |          | A          |   |   |   | 0.736435 |
| 9.224275 | 9.988321 | 9.451369 | 8.846148 P | P | P | P | 9.447662 |
| 6.907157 | 6.423914 | 9.159948 | 10.01483 P | P | A | P | 7.178547 |
| 6.325178 |          |          | A          |   |   |   | 5.151718 |
|          |          | 7.164437 |            |   | A |   |          |
|          | 6.7138   | 5.710982 | 6.288052   | P | P | P |          |
| 11.8091  | 11.92967 | 11.37649 | 11.11585 P | P | P | P | 11.00909 |
| 9.413736 | 9.305064 | 10.10588 | 10.8466 P  | P | P | P | 9.516881 |
| 7.426231 | 7.590043 | 8.432802 | 8.949504 P | P | P | P | 7.593891 |
|          |          | 2.524371 |            |   | M |   |          |
| 6.070727 | 6.804082 | 5.80611  | A          | P | P |   | 6.351122 |
|          | 2.013677 |          |            | P |   |   |          |
| 6.604533 | 6.598835 | 6.296942 | 7.346621 P | P | P | P | 6.433091 |
| 8.064968 | 7.843037 | 8.316039 | 9.056823 P | P | P | P | 8.508302 |
| 7.947871 | 7.847289 | 9.157751 | 8.316316 P | P | P | P | 7.916606 |
|          |          | 1.717972 |            |   | P |   |          |
| 4.692165 | 6.476863 | 3.494389 | P          | P | P |   | 6.438886 |
| 8.676165 | 7.540618 | 7.856186 | 7.240767 P | P | P | P | 7.406002 |
| 1.852986 | 6.150538 |          | P          | A |   |   | 5.820433 |
| 6.665406 | 6.05255  | 4.993846 | 6.356656 M | P | P | P | 6.428269 |
| 5.24604  | 5.519988 |          | 6.886572 P | P |   | P | 6.905434 |
|          |          | 6.554014 |            |   | A |   |          |
| 8.9269   | 8.535387 | 8.367706 | 7.372597 P | P | P | P | 8.321553 |
| 5.744731 | 5.664679 |          | A          | P |   |   | 3.170938 |
| 8.312724 | 9.642204 | 7.971822 | 7.860891 P | P | P | P | 8.69298  |
| 9.525715 | 7.123269 | 8.610476 | 7.72791 P  | P | P | A | 6.426136 |
|          |          | 7.194628 |            |   |   | A |          |
| 6.288676 | 6.339747 | 6.833211 | 7.23809 A  | P | A | A | 5.931346 |

|          |          |          |            |   |   |   |          |
|----------|----------|----------|------------|---|---|---|----------|
|          | 5.926989 |          | 7.019573   | A |   | A |          |
| 7.481549 | 7.829511 | 7.834079 | 6.497806 P | P | P | P | 7.521088 |
| 7.707377 | 7.707913 | 6.210352 | 7.451242 P | P | P | P | 7.379291 |
| 7.639287 | 7.485786 | 7.552133 | 6.134993 P | P | P | P | 7.329581 |
| 8.111071 | 7.94346  | 7.164624 | 7.783874 P | P | P | P | 7.810845 |
|          | 5.182844 | 5.695204 |            | A | P |   |          |
| 4.717675 |          | 2.000738 | P          |   | P |   | 5.555296 |
|          |          | 0.918441 |            |   | P |   |          |
|          |          |          | 6.198546   |   |   | A |          |
| 6.701262 | 6.156641 |          | 6.051805 P | A |   | P | 6.992109 |
|          |          | 5.266898 | 2.170171   |   | P | P |          |
|          |          | 2.547737 | 6.288216   |   | P | P |          |
| 7.467621 |          |          | A          |   |   |   | 6.125078 |
| 9.95227  | 7.455949 | 9.158104 | 9.140118 P | P | P | P | 6.772772 |
| 3.863317 | 4.791624 | 4.736232 | P          | M | P |   | 5.056673 |
| 4.656788 |          | 5.915848 | P          |   | P |   | 6.110258 |
| 5.316273 |          |          | 5.758192 M |   |   | A | 5.355481 |
|          | 0.541437 |          |            | P |   |   |          |
| 5.131049 |          | 5.848596 | 2.698061 M |   | A | P | 5.218642 |
| 6.075642 | 5.925146 | 6.367514 | 6.198786 P | P | A | P | 5.813768 |
| 7.140685 | 7.66149  | 6.992735 | 6.377886 P | P | P | P | 6.287351 |
| 6.372099 | 6.399503 | 7.03424  | 7.219839 A | P | P | A | 6.887265 |
| 7.556669 | 7.744756 | 8.511035 | 8.31198 P  | P | P | P | 7.126899 |
| 8.972193 | 9.126109 | 8.363652 | 6.041071 P | P | P | P | 8.220278 |
| 8.530213 | 8.091017 | 9.442121 | 8.303912 P | P | P | P | 7.955098 |
| 7.449863 | 7.054745 | 7.040332 | 5.688029 P | P | A | P | 7.15968  |
|          | 5.756598 |          |            | A |   |   |          |
|          |          |          | 7.91532    |   |   | A |          |
| 8.694546 | 9.005845 | 8.054295 | 7.94425 P  | P | P | P | 8.307607 |
| 8.435796 | 8.338626 | 7.696499 | 9.377915 P | P | P | P | 9.747319 |
| 7.057745 | 7.478587 | 6.756342 | 6.668953 P | P | P | P | 7.11779  |
| 6.910845 | 6.845547 | 5.973862 | 6.525375 P | P | P | P | 7.06793  |
| 8.792851 | 9.293694 | 8.553424 | 8.777474 P | P | P | P | 9.031163 |
| 5.117554 |          |          | 6.314397 P |   |   | A | 5.68712  |
| 8.787114 | 9.549228 | 7.860871 | 7.922674 P | P | P | P | 9.198653 |
| 6.800663 |          |          | 1.771829 A |   |   | M | 5.804764 |
| 8.468398 | 9.152122 | 9.088413 | 9.710967 P | P | P | P | 8.644897 |
|          | 6.037051 | 6.151527 | 2.998622   | P | P | P |          |
|          |          | 8.461072 |            |   | A |   |          |
| 7.333823 | 8.155372 | 7.53294  | 7.564915 P | P | P | P | 8.677666 |



|          |          |          |          |   |   |   |          |
|----------|----------|----------|----------|---|---|---|----------|
| 8.500826 | 9.173183 | 6.86879  | 7.438316 | P | P | P | 8.661214 |
|          |          | 4.7578   |          |   | P |   |          |
| 11.79112 | 11.65583 | 11.04153 | 10.09381 | P | P | P | 11.29315 |
| 5.882922 | 5.763605 | 6.405856 | A        | A | A |   | 5.068762 |
| 4.69545  | 6.245416 | 5.475104 | 6.195288 | M | P | M | 5.777813 |
| 9.235544 | 8.657411 | 8.360356 | 9.288732 | P | P | A | 7.006769 |
| 9.966567 | 9.642962 | 9.750884 | 9.339371 | P | P | P | 10.45099 |
| 6.820317 | 7.159004 | 7.517033 | 8.081999 | P | P | P | 7.917933 |
| 7.210677 |          | 8.681174 | M        |   | A |   | 8.376061 |
| 7.32603  | 7.421328 | 6.655108 | 7.021576 | P | P | P | 7.190236 |
| 2.712379 | 6.117516 |          | P        | P |   |   | 6.25197  |
| 4.310179 |          |          | M        |   |   |   | 5.49535  |
| 5.489851 | 6.131714 |          | 7.311292 | P |   | A | 6.498826 |
| 7.503999 | 7.281361 | 7.927816 | 7.995668 | P | P | P | 6.903845 |
| 5.737101 | 5.868176 | 4.90296  | 6.423586 | A | P | A | 5.434417 |
| 0.629959 |          |          | P        |   |   |   | 5.395083 |
| 5.515223 |          | 5.625645 | A        |   | P |   | 4.359533 |
|          |          | 6.152236 |          |   | A |   |          |
|          | 6.02287  |          |          | M |   |   |          |
| 7.450465 | 7.361232 | 7.379301 | 8.669241 | P | P | P | 7.611418 |
| 5.877286 | 6.224153 | 4.909799 | 4.877463 | P | A | P | 6.26027  |
| 7.759426 | 8.443556 | 6.63225  | 7.426721 | P | P | P | 7.619583 |
| 6.298776 | 6.404483 | 5.704195 | 6.541142 | P | P | A | 7.265707 |
| 7.584383 | 6.776309 | 6.491584 | 4.394345 | P | P | P | 6.826406 |
|          | 6.480938 |          |          | A |   |   |          |
| 6.005406 | 6.127439 | 7.413383 | 7.399247 | P | P | A | 6.186145 |
| 5.780345 | 5.068429 | 5.91401  | 3.68425  | P | P | M | 5.734017 |
|          | 4.242801 | 6.40994  | 6.527257 |   | P | P | A        |
| 7.007552 | 7.681785 | 7.508954 | 6.943774 | P | P | P | 7.286342 |
|          |          | 5.394116 |          |   | P |   |          |
| 5.93458  | 6.161782 | 3.886588 | A        | P | M |   | 5.250203 |
| 6.652931 | 7.499876 | 7.846922 | 8.124282 | P | P | P | 7.277738 |
| 8.438657 | 8.811042 | 7.994631 | 8.230981 | P | P | P | 8.711915 |
| 4.275636 |          | 5.570574 | P        |   | M |   | 5.573501 |
| 6.240177 | 5.729411 |          | P        | P |   |   | 7.872768 |
|          | 4.57869  |          |          | M |   |   |          |
| 5.199311 |          |          | P        |   |   |   | 6.283472 |
| 6.527405 | 6.825165 | 7.803097 | A        | A | A |   | 6.446142 |
| 7.878379 | 8.669761 | 8.188907 | 7.004458 | P | P | P | 8.662512 |
| 7.228115 | 6.959647 | 6.239803 | 4.50022  | P | P | P | 6.557474 |

|          |          |          |          |   |   |   |          |
|----------|----------|----------|----------|---|---|---|----------|
| 6.579778 | 7.504121 | 7.450105 | 7.052421 | P | P | P | 7.754446 |
|          |          | 2.070515 |          |   | P |   |          |
| 7.986649 | 8.955062 | 7.038446 | 7.655455 | P | P | P | 8.388833 |
| 8.495887 | 8.037002 | 9.384975 | 8.457222 | A | P | P | 7.458635 |
| 12.79831 | 12.71478 | 10.22737 | 13.06545 | P | P | P | 13.1378  |
| 8.364062 | 8.961794 |          | 7.25401  | A |   | P | 7.780281 |
| 10.4504  | 10.73704 | 9.898662 | 10.10006 | P | P | P | 10.09484 |
| 7.898544 | 8.830902 | 7.86886  | 7.188642 | P | P | P | 7.779705 |
| 8.862885 | 8.387021 | 8.472978 | 9.182375 | P | P | P | 8.887535 |
| 8.752891 | 8.957679 | 8.471508 | 7.599961 | P | P | P | 8.596804 |
| 9.962839 | 10.79316 | 9.549211 | 8.721663 | P | P | P | 10.33814 |
|          |          | 0.259232 | P        |   | P |   | 4.531901 |
|          | 5.019309 | 1.085884 |          | A | M |   |          |
| 9.402158 | 8.370144 | 8.263159 | 6.636504 | P | P | P | 6.974096 |
|          |          |          | 3.207438 |   |   | P |          |
| 9.151029 | 9.873159 | 9.75062  | 9.966756 | P | P | P | 9.684308 |
| 5.520829 |          |          | 5.357264 | A |   | P | 2.726326 |
| 6.504561 | 6.53894  | 6.558613 | 5.217805 | P | P | P | 6.215849 |
| 6.926488 | 6.850555 | 7.135436 | 6.911796 | A | P | A | 6.956265 |
|          | 6.132309 | 7.640492 | 8.351651 | P | A | A |          |
| 7.083033 | 6.725065 | 5.96785  | P        | P | P |   | 6.832189 |
|          | 5.537551 | 5.55229  |          | M | P |   |          |
| 5.639569 | 6.823515 | 3.559454 | P        | A | P |   | 7.211731 |
|          |          | 3.857513 |          |   | P |   |          |
| 5.137408 |          |          | 6.256104 | P |   | P | 7.217814 |
| 6.319493 | 6.931273 | 6.310115 | M        | P | P |   | 6.88475  |
|          | 5.36017  |          |          | A |   |   |          |
| 7.020606 | 6.643262 | 5.322468 | 6.935085 | P | P | P | 7.488406 |
| 6.531916 | 7.160793 | 6.126269 | 6.704662 | P | P | A | 6.827493 |
| 5.035106 | 6.314861 | 4.790157 | A        | P | P |   | 4.770369 |
| 5.653483 |          | 5.921343 | 6.610966 | A | A | M | 6.069665 |
| 5.940126 | 4.172641 | 6.101083 | P        | M | P |   | 6.451867 |
| 5.276343 | 5.710973 |          | 5.952191 | P |   | A | 6.83925  |
|          | 6.391733 | 5.281177 | 5.242249 | A | M | P |          |
| 5.449736 |          |          | 6.135925 | P |   | A | 5.432849 |
| 8.654484 | 8.154429 | 8.881402 | 8.002655 | P | P | P | 7.562795 |
|          | 2.752473 |          |          | P |   |   |          |
|          |          | 3.064293 |          |   | P |   |          |
| 8.458381 | 7.706393 | 9.006796 | 8.874703 | P | P | P | 7.859624 |
| 6.187319 | 5.438645 | 5.878289 | 6.704608 | P | P | P | 5.925703 |

|          |          |          |          |   |   |   |   |  |          |
|----------|----------|----------|----------|---|---|---|---|--|----------|
| 4.330698 | 5.412354 |          |          | M | A |   |   |  | 6.22015  |
| 8.940806 | 8.737144 | 7.540039 | 7.513447 | P | P | P | P |  | 7.655086 |
| 7.95062  | 7.638348 | 7.13666  | 3.735012 | A | P | P | P |  | 6.802742 |
| 5.715571 | 4.612165 |          | 6.02896  | P | M |   | M |  | 4.872892 |
|          |          | 5.727023 |          |   |   | A |   |  |          |
|          | 5.337949 |          |          |   | A |   |   |  |          |
| 5.904733 | 4.793015 | 6.070897 |          | A | P | A |   |  | 6.587188 |
| 5.69168  | 5.80047  | 7.033052 | 6.29209  | A | A | P | A |  | 6.12042  |
| 7.802249 | 9.077827 | 8.591795 | 7.948344 | P | P | P | P |  | 8.333708 |
| 6.047237 |          |          | 6.890283 | A |   |   | A |  | 4.769357 |
| 7.33915  | 6.566677 | 6.725661 | 7.397645 | P | P | P | A |  | 7.117467 |
| 7.38735  | 6.815236 | 6.265805 | 5.39721  | A | A | P | P |  | 5.966419 |
|          | 5.031656 | 6.118808 | 5.314989 |   | M | P | P |  |          |
| 6.188997 | 6.34788  | 6.771359 |          | P | P | A |   |  | 6.428516 |
|          | 5.413132 |          |          |   | A |   |   |  |          |
|          |          | 6.519258 |          |   |   | P |   |  |          |
| 7.378413 | 6.617218 | 7.299697 | 6.948036 | P | P | P | P |  | 6.351595 |
| 8.89708  | 8.823386 | 6.914678 | 7.819969 | P | P | P | P |  | 8.82339  |
| 9.735312 | 9.445745 | 8.350515 | 8.207745 | P | P | P | P |  | 8.884094 |
| 5.57672  | 5.780237 | 5.232167 | 6.104045 | P | A | P | P |  | 5.655357 |
| 7.231304 | 8.205216 | 7.395535 | 7.076951 | P | P | P | P |  | 7.152086 |
| 8.161387 | 8.571168 | 8.13259  | 6.952444 | P | P | P | P |  | 7.829462 |
|          |          |          | 6.899673 |   |   |   | A |  |          |
| 7.555038 | 6.912872 | 7.972009 | 8.001132 | P | P | M | P |  | 7.467944 |
| 9.012402 | 9.226659 | 8.873178 | 8.969544 | P | P | P | P |  | 9.098439 |
| 8.504625 | 8.709622 | 8.148962 | 6.92483  | P | P | P | P |  | 7.81025  |
| 7.025705 | 7.889553 | 7.557827 | 6.385261 | P | P | P | M |  | 6.970003 |
| 6.78495  | 7.040793 |          | 6.375765 | M | P |   | P |  | 7.035202 |
|          |          |          |          |   |   | M |   |  |          |
| 8.827179 | 8.30538  | 7.983327 | 8.186332 | P | P | P | P |  | 7.639513 |
| 6.933188 | 6.917166 | 6.774442 | 6.362815 | A | P | P | P |  | 6.736865 |
| 4.789353 | 1.566074 | 6.604673 | 7.090929 | P | P | P | P |  | 6.671179 |
| 5.950763 | 6.051611 | 5.88351  | 1.609819 | P | P | P | P |  | 6.662918 |
| 7.47718  | 7.802866 | 7.423017 | 6.780741 | P | P | P | P |  | 7.779995 |
| 8.463769 | 9.129732 | 9.09095  | 7.725817 | P | P | P | P |  | 8.455678 |
| 5.24223  |          |          |          | A |   |   |   |  | 3.872671 |
| 4.655959 | 4.464309 | 4.766762 |          | P | A | M |   |  | 5.633573 |
| 7.267109 | 6.668233 | 6.617874 |          | A | P | P |   |  | 6.751742 |
| 7.565452 | 7.799669 | 7.42629  | 8.014456 | P | P | P | P |  | 7.685019 |
| 7.042393 | 6.935436 | 7.327257 | 7.34234  | A | P | P | P |  | 5.678867 |

|          |          |          |          |   |   |   |   |          |
|----------|----------|----------|----------|---|---|---|---|----------|
| 5.177721 |          |          |          | P |   |   |   | 6.870409 |
| 8.196354 | 8.577866 | 7.72976  | 7.180231 | P | P | P | P | 7.808303 |
|          |          | 1.001931 |          |   |   | P |   |          |
|          |          |          | 5.946455 |   |   |   | P |          |
| 6.62224  | 5.7919   | 5.675239 | 7.436607 | A | P | P | A | 5.626645 |
|          |          |          | 8.498469 |   |   |   | A |          |
| 6.079516 | 4.567051 |          |          | M | P |   |   | 5.52357  |
| 5.991096 | 5.18333  |          |          | A | P |   |   | 4.564977 |
| 4.537499 |          |          |          | M |   |   |   | 6.675438 |
| 7.355988 | 5.200873 | 5.984958 | 6.727551 | P | P | M | P | 7.386964 |
| 6.115729 |          | 6.006511 | 5.209819 | A |   | P | P | 5.705525 |
|          | 4.849188 |          |          |   | A |   |   |          |
| 8.544217 | 8.037225 | 7.08247  | 7.297214 | P | P | P | P | 8.033601 |
|          | 5.764768 | 5.181016 |          |   | P | P |   |          |
| 6.226479 | 6.955651 | 5.85476  | 6.525043 | P | P | P | P | 6.843164 |
| 5.024688 |          |          |          | P |   |   |   | 6.668012 |
|          | 3.372281 | 6.440304 |          |   | P | P |   |          |
|          | 5.729098 | 5.464527 |          |   | A | P |   |          |
|          | 5.661819 | 4.500379 | 7.049223 |   | P | M | P |          |
| 5.074497 |          | 6.519044 | 5.65419  | A |   | A | P | 2.672836 |
|          | 6.714179 | 5.748452 | 6.845988 |   | P | P | P |          |
|          |          | 7.302622 | 7.805564 |   |   | P | A |          |
|          |          | 6.169633 | 6.224066 |   |   | P | A |          |
|          |          | 1.168139 |          |   |   | P |   |          |
|          |          | 7.410008 |          |   |   | A |   |          |
| 7.208675 | 7.748186 | 6.859084 |          | A | P | P |   | 7.872866 |
| 8.55556  | 7.787363 | 8.123188 | 8.305456 | P | P | P | P | 8.471486 |
| 1.023109 |          |          |          | P |   |   |   | 5.925129 |
|          | 3.807443 |          |          |   | P |   |   |          |
| 8.445756 | 9.130678 | 7.969437 | 7.798981 | P | P | P | P | 8.84826  |
| 8.89059  | 8.29503  | 6.969878 | 6.312939 | P | P | P | P | 7.901731 |
| 9.822765 | 10.32271 | 9.395551 | 7.599333 | P | P | P | P | 9.437569 |
|          |          |          | 6.973789 |   |   |   | A |          |
|          |          |          | 4.830527 |   |   |   | P |          |
| 7.925468 | 7.107276 | 7.889436 | 7.765924 | P | P | P | P | 7.137125 |
| 7.195897 | 7.151432 | 8.057793 | 7.307874 | P | P | P | A | 7.340606 |
| 6.756106 | 7.344757 | 7.094835 | 3.028835 | P | P | P | P | 7.16982  |
| 6.234411 | 5.097849 | 6.720084 | 7.162077 | A | P | A | A | 4.91608  |
| 6.879269 | 6.46458  | 6.796556 | 5.513358 | P | P | P | P | 6.803898 |
| 6.11738  | 5.898567 |          | 5.974401 | P | A |   | A | 6.02145  |

|          |          |          |          |   |   |   |   |          |
|----------|----------|----------|----------|---|---|---|---|----------|
| 7.837331 | 6.792955 | 6.566937 |          | A | P | M |   | 5.706025 |
|          |          | 1.227794 |          |   |   | P |   |          |
| 5.716152 | 5.45072  | 7.243638 | 7.802731 | P | A | A | A | 6.397747 |
|          |          | 5.421397 |          |   |   | A |   |          |
| 5.176449 | 5.457956 | 3.116313 |          | P | P | P |   | 6.557404 |
| 6.402389 | 5.48405  | 4.588514 |          | A | A | P |   | 3.805906 |
| 3.890427 | 6.317776 |          | 7.373733 | M | A |   | A | 6.150102 |
| 6.787785 | 8.269019 | 6.698947 | 6.067934 | P | P | P | P | 7.160547 |
| 7.288912 | 7.909489 | 6.010173 | 6.38555  | A | P | P | P | 6.636492 |
| 5.764304 | 6.67332  | 6.26453  | 5.773657 | P | P | P | P | 6.45758  |
| 9.130712 | 8.798752 | 8.376187 | 8.241128 | P | P | P | P | 8.185197 |
|          | 6.071321 |          |          |   | A |   |   |          |
| 7.698805 | 8.002079 | 7.366332 |          | P | P | P |   | 7.630867 |
| 7.320443 | 7.324328 | 5.693341 |          | A | P | P |   | 6.284496 |
| 8.817741 | 7.895137 | 8.18477  | 8.097084 | P | P | P | P | 7.721627 |
|          |          |          | 7.229489 |   |   |   | A |          |
| 7.027583 | 7.060294 | 6.489988 | 5.282927 | P | P | P | P | 7.034156 |
|          | 3.62132  |          |          | P |   |   |   | 6.28429  |
| 7.589146 | 7.113984 | 7.422992 | 7.422669 | A | P | P | P | 6.471201 |
| 6.583396 |          | 5.932267 |          | A |   | P |   | 5.146673 |
|          |          |          | 6.09142  |   |   |   | A |          |
|          |          | 6.47765  |          |   |   | A |   |          |
| 6.938295 | 7.390817 | 6.864146 | 6.683721 | P | P | P | M | 7.717438 |
| 6.053121 | 6.102539 | 6.453006 | 7.144004 | P | P | P | P | 7.161045 |
| 5.790683 |          | 2.605431 | 4.961695 | P |   | P | M | 5.505203 |
| 7.446314 | 7.546548 | 7.004418 | 8.110273 | P | P | P | P | 7.466488 |
| 8.340459 | 8.399708 | 6.992774 | 4.615624 | A | P | P | P | 6.837889 |
| 8.720038 | 9.093829 | 8.768153 | 8.183848 | P | P | P | P | 8.078309 |
| 6.277232 |          |          |          | A |   |   |   | 1.610159 |
|          | 5.536578 | 0.913123 | 6.480039 |   | P | P | P |          |
| 10.07565 | 10.78011 | 9.566257 | 8.313784 | P | P | P | P | 10.14711 |
| 5.472127 | 3.55096  |          |          | A | P |   |   | 6.162653 |
| 11.09425 | 10.6621  | 9.997128 | 10.03839 | P | P | P | P | 10.91375 |
| 7.978938 | 8.231988 | 7.134495 | 7.438823 | P | P | P | P | 7.582054 |
| 7.383029 | 8.033049 | 8.044395 | 8.952607 | P | P | P | P | 8.512366 |
| 6.338341 | 5.663916 | 4.68972  | 6.182491 | A | A | P | P | 5.727795 |
| 5.869067 | 5.110072 | 5.60837  | 4.457747 | A | P | P | P | 5.542322 |
| 8.653363 | 8.954252 | 8.448722 | 7.182948 | P | P | P | P | 8.334555 |
|          | 5.500003 |          |          |   | P |   |   |          |
|          | 5.662367 | 5.368978 | 6.734882 |   | P | A | P |          |

|          |          |          |            |   |   |   |          |
|----------|----------|----------|------------|---|---|---|----------|
|          | 6.573797 | 6.331055 |            | P | P |   |          |
| 6.181284 | 6.334363 |          | 3.431564 P | A |   | M | 5.880881 |
|          |          | 6.175597 |            |   | P |   |          |
| 6.893252 | 7.007449 | 6.747602 | 6.851754 A | P | P | P | 5.867177 |
|          | 2.580394 |          |            | P |   |   |          |
| 8.711078 | 9.193372 | 6.187181 | 5.359563 P | P | P | P | 8.679914 |
|          |          |          | 6.629539   |   |   | A |          |
|          | 4.802153 | 4.766206 | 6.442411   | M | P | P |          |
| 4.004469 |          |          | M          |   |   |   | 5.48334  |
| 5.836954 | 5.672488 | 5.979491 | 6.06306 A  | A | P | P | 4.600186 |
| 9.615674 | 10.27391 | 8.825921 | 9.004344 P | P | P | P | 10.02687 |
| 5.151549 | 5.608592 | 2.154114 | P          | P | P |   | 6.095228 |
| 8.327795 | 9.611322 | 8.44171  | 8.088996 P | P | P | P | 8.957866 |
| 5.23937  | 6.651751 | 6.046485 | 6.573344 P | P | P | P | 7.282096 |
| 10.97545 | 11.04322 | 10.59809 | 9.789377 P | P | P | P | 11.11518 |
| 4.983749 |          |          | P          |   |   |   | 6.49948  |
| 5.794628 | 6.150614 | 5.80203  | 6.151322 M | P | P | P | 6.464903 |
| 4.075333 | 4.880532 | 6.346101 | 3.782443 P | P | P | P | 5.725027 |
|          |          | 3.48416  |            |   | P |   |          |
|          |          |          | 1.400461   |   |   | P |          |
|          | 5.894022 |          |            | A |   |   |          |
| 8.944575 | 9.077948 | 8.381924 | 7.496156 P | P | P | P | 8.879144 |
| 3.900107 |          |          | M          |   |   |   | 5.173504 |
| 9.119746 | 9.566338 | 8.884986 | 7.714382 P | P | P | P | 9.010862 |
| 2.012462 |          |          | P          |   |   |   | 6.009068 |
| 0.795859 |          |          | M          |   |   |   | 5.073753 |
| 9.400369 | 9.814865 | 9.073672 | 8.142284 P | P | P | P | 9.197292 |
|          |          | 4.26333  |            |   | P |   |          |
|          |          |          | 6.903499   |   |   | A |          |
| 6.303563 |          |          | A          |   |   |   | 5.278956 |
| 3.783789 |          |          | P          |   |   |   | 6.048027 |
|          | 5.916404 |          | 5.499391   | P |   | P |          |
| 6.639603 | 6.298864 |          | A          | A |   |   | 5.256839 |
| 6.095686 | 3.902787 |          | A          | P |   |   | 4.20134  |
|          | 5.302087 |          |            | A |   |   |          |
| 2.070307 |          |          | P          |   |   |   | 6.406315 |
| 4.824368 |          |          | P          |   |   |   | 6.631043 |
|          |          | 4.068984 |            |   | P |   |          |
| 6.714708 | 6.188363 | 5.395827 | A          | P | P |   | 6.052724 |
| 9.280573 | 9.055855 | 6.992779 | 7.130541 P | P | P | P | 8.492353 |

|          |          |          |          |   |   |   |          |
|----------|----------|----------|----------|---|---|---|----------|
| 7.202617 | 7.174375 | 7.784063 | 8.341251 | P | P | P | 7.068373 |
| 6.233618 | 4.511669 |          | 6.866291 | P | M | M | 6.888316 |
| 11.43835 | 12.24899 | 11.48793 | 10.58862 | P | P | P | 11.92922 |
|          | 5.664119 |          |          | A |   |   |          |
| 5.48589  | 4.86246  |          | 6.892518 | A |   | A | 4.984144 |
| 10.72008 | 10.73043 | 10.09205 | 9.376062 | P | P | P | 10.1803  |
| 8.864434 | 8.771151 | 8.016177 | 7.570144 | P | P | P | 8.170722 |
|          | 5.326441 | 3.377089 | 6.31176  | A | M | P |          |
| 1.591648 |          |          | 6.63719  | M |   | A | 5.956348 |
|          |          | 1.543976 |          |   | M |   |          |
| 5.551471 |          | 2.466802 | 6.078492 | P | P | P | 5.35878  |
|          | 5.378509 |          | 6.754281 | P |   | A |          |
|          | 4.774558 |          | 6.811997 | A |   | A |          |
| 5.665405 | 4.751974 |          | 4.021666 | A |   | P | 4.899626 |
|          |          | 6.616136 |          |   | A |   |          |
| 4.227228 | 5.059506 | 5.479143 | P        | P | P |   | 6.067933 |
| 7.612422 | 8.390842 | 7.761022 | 7.742475 | P | P | P | 7.339449 |
| 7.229492 |          | 7.167458 | A        |   | A |   | 4.667543 |
| 6.597091 | 6.423986 | 7.437505 | 6.802439 | P | P | A | 7.412458 |
| 5.914474 |          |          | 6.631511 | A |   | A | 5.684771 |
| 6.837849 | 6.984205 | 7.518148 | 8.877563 | P | P | P | 7.99317  |
| 7.406694 | 7.429345 | 7.826191 | 8.437675 | P | A | P | 7.927803 |
| 6.829358 | 6.203067 | 7.260069 | 7.720595 | A | P | M | A        |
|          |          | 4.753408 |          |   | P |   |          |
| 7.36613  | 7.920139 | 8.617714 | 8.588566 | P | P | A | 7.792172 |
|          | 5.502421 | 5.454512 |          | P | P |   |          |
| 6.458079 | 5.665302 | 6.245461 | 7.447188 | P | P | P | 7.359079 |
| 4.892197 |          | 4.973372 | P        |   | P |   | 5.659048 |
| 3.493368 |          |          | M        |   |   |   | 6.164852 |
|          |          | 2.753208 |          |   |   | P |          |
|          |          | 6.11753  |          |   | A |   |          |
| 8.601016 | 7.882795 | 8.942728 | 8.237127 | A | P | P | A        |
| 1.936714 |          |          | P        |   |   |   | 7.387625 |
|          | 6.706418 | 5.342894 | 3.537354 |   | P | P | P        |
| 5.323015 | 6.600267 | 6.098136 | 6.430604 | P | P | P | 7.224212 |
| 7.412794 |          | 7.161907 | P        |   | P |   | 6.408482 |
|          |          | 3.920732 |          |   | M |   |          |
| 9.475388 | 9.183856 | 10.63977 | 10.78198 | P | P | P | 9.393413 |
| 6.855795 | 7.425093 | 7.647022 | 9.88741  | P | P | P | 9.007499 |
| 11.16243 | 11.5332  | 11.96674 | 12.98675 | P | P | P | 11.54594 |

|          |          |          |            |   |   |   |          |
|----------|----------|----------|------------|---|---|---|----------|
|          | 6.683679 | 6.559432 | 4.893735   | P | P | M |          |
| 8.714465 | 9.190485 | 8.69397  | 8.604762 P | P | P | P | 8.354294 |
| 9.429379 | 9.971677 | 8.879194 | 7.797138 P | P | P | P | 9.571315 |
|          |          | 4.508397 |            |   | P |   |          |
| 10.98198 | 11.57068 | 9.782511 | 9.262908 P | P | P | P | 10.6961  |
| 6.179413 |          | 5.963985 | 6.536386 P |   | A | A | 5.609488 |
| 9.217975 | 8.23897  | 8.927045 | 8.215166 P | P | P | P | 7.992728 |
| 12.68234 | 11.67298 | 11.93689 | 11.24173 P | P | P | P | 10.76626 |
|          | 5.521384 | 2.707948 |            | M | M |   |          |
| 8.074432 | 6.955598 | 8.482495 | 8.105326 M | P | P | A | 7.452153 |
| 10.25514 | 9.52004  | 9.666225 | 9.2197 P   | P | P | P | 8.722481 |
| 6.350934 | 6.083065 | 6.408094 | P          | A | P |   | 6.803264 |
| 5.331514 | 5.106827 | 4.757814 | P          | P | P |   | 6.020912 |
|          | 6.676602 |          | 3.82867    | P |   | P |          |
| 12.8972  | 13.18554 | 11.95316 | 12.71993 P | P | P | P | 13.49291 |
| 6.303553 |          |          | P          |   |   |   | 7.357521 |
|          |          | 6.709543 |            |   |   | A |          |
| 5.557262 | 5.421291 | 5.459817 | P          | A | A |   | 5.611612 |
| 7.681802 | 6.994674 | 8.295524 | 7.843505 A | P | P | P | 6.642308 |
| 6.815621 |          | 7.376979 | 7.221882 A |   | A | A | 6.063357 |
| 7.706171 | 7.779039 | 6.085294 | 2.390791 P | P | P | P | 6.696429 |
| 9.231524 | 10.25675 | 9.498351 | 8.21143 P  | P | P | P | 9.286307 |
| 6.380836 | 6.667465 | 5.839831 | 6.352098 P | P | P | P | 7.332418 |
| 5.949312 | 5.530845 | 5.707451 | 2.098797 A | P | M | P | 6.428906 |
|          | 5.115202 |          |            | P |   |   |          |
| 6.805334 | 7.793803 | 6.795633 | 3.840581 P | P | P | P | 7.668069 |
| 6.701902 | 6.196236 | 6.124494 | 7.402231 A | P | A | A | 5.713387 |
| 6.500739 | 6.384965 | 7.275489 | P          | A | A |   | 7.09521  |
| 5.598121 |          | 5.033639 | A          |   | P |   | 5.552534 |
| 6.879436 | 6.641879 | 5.872966 | A          | P | P |   | 6.17798  |
| 4.836847 |          |          | P          |   |   |   | 6.472467 |
| 8.319751 | 6.732408 | 6.503073 | 8.932973 P | P | P | P | 7.9511   |
| 4.022332 |          |          | P          |   |   |   | 5.565718 |
|          | 5.324572 |          |            | P |   |   |          |
| 8.827484 | 8.353029 | 8.101342 | 7.141295 P | P | P | P | 7.825355 |
| 6.041915 | 5.301879 | 4.094236 | 5.844974 A | P | P | P | 4.700183 |
|          | 6.225711 | 6.723733 | 6.023794   | P | A | M |          |
| 4.730727 |          |          | A          |   |   |   | 2.643869 |
| 5.32997  |          | 5.960127 | A          |   | P |   | 5.389522 |
| 7.155298 | 6.176384 | 7.662727 | 7.748052 P | P | P | P | 6.779741 |



|          |          |          |          |   |   |   |   |          |
|----------|----------|----------|----------|---|---|---|---|----------|
|          | 5.231396 | 5.687063 | 6.312253 |   | P | P | A |          |
| 4.16542  |          |          | A        |   |   |   |   | 1.789855 |
| 10.95948 | 10.75772 | 8.175332 | 9.075447 | P | P | P | P | 10.74532 |
| 7.372234 | 6.925144 | 4.680421 | 4.849537 | P | P | P | P | 7.31667  |
| 8.829009 | 9.209353 | 10.09306 | 9.207784 | P | P | P | P | 8.839602 |
| 7.895269 | 7.092592 | 6.768741 | 7.735448 | P | P | P | P | 7.771587 |
|          |          | 6.366121 |          |   |   | A |   |          |
| 4.506715 |          | 6.757635 | M        |   |   | P |   | 6.257899 |
| 6.24087  |          |          | P        |   |   |   |   | 7.262088 |
| 7.217534 | 6.497885 | 7.166748 | A        | A | A |   |   | 3.363131 |
| 6.049979 | 5.996443 | 3.993894 | 6.143376 | P | A | P | P | 6.733345 |
|          |          | 5.526513 |          |   |   | A |   |          |
| 10.2653  | 10.11352 | 9.261739 | 8.420025 | P | P | P | P | 9.712643 |
| 0.319641 |          |          | P        |   |   |   |   | 5.358943 |
| 6.458117 |          |          | A        |   |   |   |   | 2.24891  |
| 5.396943 | 5.774507 |          | 7.668991 | M | P |   | A | 7.387225 |
| 5.922796 | 4.985868 |          | 6.569874 | A | P |   | A | 5.176323 |
| 9.993648 | 9.767026 | 9.007534 | 8.955562 | P | P | P | P | 9.598931 |
| 7.850087 | 7.935864 | 7.37752  | 6.943422 | P | P | P | P | 7.221161 |
| 11.07847 | 11.26188 | 11.62438 | 11.96633 | P | P | P | P | 10.91465 |
| 5.367892 |          | 6.172373 | A        |   |   | A |   | 1.684353 |
| 6.523181 |          | 6.20713  | 4.910709 | A |   | P | P | 4.614129 |
| 5.434595 | 5.543037 |          | A        | P |   |   |   | 4.111003 |
| 6.94873  | 5.827868 | 5.053453 | 6.244704 | P | P | P | P | 6.57309  |
| 6.101161 |          | 4.090521 | 6.812521 | P |   | P | P | 6.250217 |
| 7.347814 | 6.810998 | 5.357521 | 5.79151  | P | P | P | P | 6.876319 |
|          |          |          | 2.625113 |   |   |   | P |          |
|          |          | 6.984249 | 8.155986 |   |   | A | A |          |
|          | 4.167876 |          |          | P |   |   |   |          |
| 6.065236 |          | 4.546137 | 6.069102 | A |   | P | P | 1.389077 |
|          | 6.716971 | 7.461062 | 7.846334 | M | A | A | A |          |
| 4.560698 | 6.878644 | 6.755037 | 5.798291 | P | P | P | P | 5.945962 |
| 7.126802 | 7.705859 | 6.79242  | 6.821101 | P | P | P | P | 7.219573 |
|          |          | 3.537834 | 5.738894 |   |   | P | M |          |
| 6.424011 | 6.444436 | 7.493587 | 6.953235 | P | P | P | P | 7.11482  |
| 6.210088 |          | 6.756498 | A        |   |   | P |   | 5.08423  |
| 8.661013 | 9.096743 | 8.320695 | 7.398613 | P | P | P | P | 8.589252 |
| 8.819282 | 9.074183 | 7.986121 | 6.969261 | P | P | P | P | 8.854928 |
| 6.969505 | 6.649363 | 5.395488 | 2.773982 | P | P | P | P | 6.396129 |
| 6.614378 | 6.808751 | 6.160821 | 7.609877 | P | M | P | A | 8.01088  |

|          |          |          |          |   |   |   |          |
|----------|----------|----------|----------|---|---|---|----------|
| 7.898634 | 6.792933 | 5.375339 | 6.584847 | P | P | P | 7.180863 |
| 7.128362 | 8.031907 | 8.232456 | 8.079181 | P | P | P | 7.753628 |
| 5.90006  | 3.615463 |          | 5.921368 | P |   | P | 5.189291 |
| 6.43958  | 4.760057 |          | 3.497573 | P |   | M | 4.874907 |
| 8.523612 | 8.35279  | 9.295204 | 8.902279 | P | P | P | 8.329836 |
| 5.103334 | 3.701969 | 5.062114 | 6.050746 | P | P | M | 5.583118 |
|          |          |          | 5.159387 |   |   | P |          |
| 6.598421 |          |          | A        |   |   |   | 2.314903 |
|          | 6.110269 | 5.46187  | 6.574335 | P | P | P |          |
|          |          |          | 2.779255 |   |   | P |          |
| 10.35108 | 9.868962 | 9.892691 | 8.712017 | P | P | P | 9.505074 |
| 7.676944 | 7.264151 | 6.719515 | 7.297165 | P | P | P | 7.774744 |
| 6.4591   | 6.151856 | 6.291222 | 6.049096 | P | P | P | 5.379043 |
| 5.493629 |          | 6.880687 | 6.88696  |   | A | A | 5.428212 |
| 6.624585 | 6.907862 | 5.915237 | 8.18646  | P | P | P | 6.634541 |
|          |          |          | 5.966496 |   |   | A |          |
| 8.261761 | 8.105688 | 6.316115 | 6.346386 | P | P | P | 7.942043 |
| 10.7198  | 10.43319 | 8.713227 | 8.720098 | P | P | P | 10.83652 |
| 11.45248 | 12.36437 | 9.196511 | 9.758276 | P | P | P | 11.85359 |
| 6.013349 | 6.219125 | 7.100085 | 7.014099 | A | P | P | 5.322455 |
| 5.369646 | 5.811643 |          | A        | A |   |   | 3.469681 |
| 0.962785 |          |          | M        |   |   |   | 4.871939 |
|          |          |          | 7.232626 |   |   | A |          |
| 0.628088 |          |          | 5.68019  | M |   | A | 5.187075 |
|          | 1.050915 |          |          | P |   |   |          |
| 6.276611 | 5.626938 | 6.801836 | P        | A | P |   | 5.71659  |
| 7.788401 | 8.03708  | 7.281251 | 5.813821 | P | P | P | 7.627117 |
| 8.352078 | 7.733707 | 9.092131 | 8.50432  | P | P | P | 7.441936 |
| 8.210867 | 8.018799 | 7.939972 | 6.193499 | P | P | P | 7.242906 |
| 8.063925 | 8.397311 | 8.355263 | 7.511832 | P | P | P | 7.670296 |
| 7.962958 | 8.135882 | 7.448142 | 6.338734 | P | P | P | 7.252228 |
|          |          |          | 6.266788 |   |   | M |          |
| 8.159836 | 8.372358 | 8.617644 | 8.568147 | P | P | P | 8.163919 |
| 5.716413 |          |          | A        |   |   |   | 3.915745 |
| 10.8479  | 11.28168 | 9.931762 | 10.04846 | P | P | P | 11.53521 |
|          | 6.516148 | 1.896971 |          | P | P |   |          |
| 9.315136 | 9.085886 | 9.416549 | 8.434593 | P | P | P | 9.265976 |
|          |          | 2.894981 |          |   | P |   |          |
| 5.939034 | 5.908131 |          | A        | A |   |   | 6.273542 |
| 6.512899 | 5.209862 | 5.16813  | P        | M | P |   | 6.440049 |

|          |          |          |          |   |   |   |          |
|----------|----------|----------|----------|---|---|---|----------|
| 6.950339 | 7.327318 | 3.980305 | 6.68834  | P | P | P | 6.628449 |
| 5.152066 |          |          | P        |   |   |   | 6.230165 |
| 12.31465 | 13.2643  | 12.45016 | 11.5475  | P | P | P | 12.47838 |
| 8.313041 | 9.427167 | 8.951892 | 8.571538 | P | P | P | 8.606296 |
| 7.969988 | 9.240917 | 8.833879 | M        | P | P |   | 8.230763 |
| 8.445025 | 7.620853 | 8.697018 | 10.28453 | P | P | P | 8.481034 |
|          |          |          | 6.280726 |   |   | A |          |
|          | 6.179435 |          |          | M |   |   |          |
| 6.042025 |          |          | A        |   |   |   | 2.906185 |
| 6.57275  | 7.351529 |          | M        | A |   |   | 7.926951 |
|          |          | 5.970651 |          |   | M |   |          |
| 6.389772 |          | 6.778658 | 7.418558 |   | A | A | 5.25685  |
| 5.901882 |          | 6.433908 | 5.724025 |   | A | A | 4.318625 |
|          |          | 7.584162 | 7.957498 |   | P | A |          |
| 4.593432 |          |          | A        |   |   |   | 3.382692 |
| 3.380359 |          | 2.019803 | P        |   | M |   | 5.360554 |
|          | 5.601702 |          |          | A |   |   |          |
| 7.212055 | 7.945493 | 7.170081 | 6.066266 | P | P | P | 7.303353 |
| 7.769674 | 7.168152 | 7.652425 | 6.464787 | P | P | P | 7.050912 |
|          |          |          | 7.157763 |   |   | A |          |
| 8.219067 | 8.565821 | 7.756598 | 7.255987 | P | P | P | 8.503478 |
| 5.180207 |          | 6.043276 | 4.77635  |   | P | M | 6.309151 |
| 8.230263 | 7.606332 | 8.084003 | 6.986576 | P | P | P | 7.760292 |
| 4.421073 |          | 4.93413  | 2.492576 |   | P | P | 4.519395 |
|          |          | 5.98111  | 6.097305 |   | A | P |          |
| 8.474196 | 8.159122 | 9.335054 | 8.642319 | P | P | P | 8.175435 |
| 4.146061 | 5.494524 | 5.409321 | P        | A | P |   | 5.590295 |
| 9.184755 | 9.498296 | 8.592757 | 8.155175 | P | P | P | 9.277497 |
| 7.859757 | 6.547053 | 7.504781 | A        | M | P |   | 6.36559  |
| 6.310921 | 5.630989 | 6.895571 | A        | P | P |   | 4.89736  |
| 7.285259 | 6.781528 | 6.716368 | 6.671423 | A | P | A | 6.63775  |
| 8.893136 | 9.158973 | 8.383741 | 7.99644  | P | P | P | 8.699727 |
| 6.056979 | 5.998845 | 6.873798 | P        | A | A |   | 5.962346 |
| 10.33322 | 10.47991 | 11.52639 | 12.24573 | P | P | P | 10.77859 |
| 11.32958 | 10.92568 | 9.94576  | 10.77191 | P | P | P | 11.13139 |
| 6.950183 | 6.711251 | 6.307784 | 6.420783 | P | P | P | 5.529779 |
| 5.977095 |          |          | A        |   |   |   | 3.557243 |
| 5.980028 | 6.144747 | 4.606484 | A        | M | P |   | 5.708264 |
|          | 7.332407 |          | 7.198811 | A |   | A |          |
| 9.859942 | 10.01555 | 9.182916 | 9.020146 | P | P | P | 9.805249 |

|          |          |          |          |   |   |   |          |
|----------|----------|----------|----------|---|---|---|----------|
| 8.884131 | 8.736453 | 7.54208  | 7.732759 | P | P | P | 8.253406 |
| 7.331395 | 7.606823 | 6.95049  | 7.687244 | P | P | P | 7.902907 |
| 6.098762 |          |          | 7.253271 |   |   | P | 7.154899 |
| 7.296148 | 7.789325 | 7.240627 | 7.103805 | P | P | P | 7.734665 |
| 8.343953 | 8.822782 | 9.248649 | 8.498971 | P | P | P | 9.465029 |
| 7.479796 | 7.669099 | 7.416436 | 5.411463 | P | P | P | 6.990404 |
|          | 5.752852 | 3.291153 |          | P | P |   |          |
| 6.722997 | 7.285432 | 6.821593 | 5.598473 | P | P | P | 6.815563 |
|          | 6.490918 |          |          | A |   |   |          |
|          | 5.919159 |          | 4.796675 | A |   | P |          |
|          |          |          | 7.964096 |   |   | A |          |
| 7.56415  | 6.554399 | 6.677734 | 6.483641 | P | P | P | 6.144192 |
| 7.592606 | 7.114282 | 7.843305 | 6.55036  | P | P | P | 6.835339 |
| 6.60087  | 6.576312 | 5.127769 | 8.160684 | P | P | P | 8.23466  |
| 6.087614 | 6.865403 | 6.147812 | 6.75083  | P | P | A | 6.239379 |
| 7.755462 | 7.48026  | 5.951585 | 6.996594 | P | P | P | 7.534749 |
|          |          | 3.77467  |          |   | P |   |          |
| 7.865049 | 7.568459 | 8.514825 | 9.154446 | P | P | P | 7.179509 |
| 10.70107 | 11.37425 | 10.56802 | 9.656256 | P | P | P | 10.57828 |
|          | 6.655201 | 7.328835 | 8.127839 | P | P | M |          |
| 7.365394 | 6.590582 |          | A        | A |   |   | 5.436423 |
| 6.870002 | 7.199895 | 6.841785 | 6.005526 | P | P | P | 6.216531 |
| 11.2489  | 11.2728  | 10.64713 | 9.946517 | P | P | P | 10.53034 |
| 8.210146 | 8.011323 | 9.133115 | 10.21733 | P | P | P | 8.528416 |
|          |          | 6.375818 |          |   | A |   |          |
| 10.7339  | 10.30103 | 9.884986 | 9.742746 | P | P | P | 9.908839 |
| 6.905044 | 8.433817 | 7.998038 | 7.103895 | P | P | A | 7.226601 |
|          | 7.500547 | 6.074166 |          | A | P |   |          |
|          |          |          | 3.544201 |   |   | M |          |
| 6.015592 | 6.259751 | 9.363396 | 8.538343 | A | P | A | 4.33642  |
|          |          | 7.575893 |          |   | A |   |          |
| 6.760319 |          |          | A        |   |   |   | 5.742035 |
| 5.156124 |          |          | A        |   |   |   | 2.19941  |
| 6.951019 | 6.741577 | 6.331107 | P        | P | P |   | 7.215154 |
| 6.53882  |          |          | A        |   |   |   | 5.43183  |
| 9.707738 | 10.34479 | 10.27289 | 9.102366 | P | P | P | 9.704595 |
| 5.378664 |          | 3.894057 | A        |   | P |   | 5.119426 |
| 6.782191 |          | 6.709823 | A        |   | A |   | 5.084294 |
| 5.226312 | 6.33426  | 1.73058  | P        | P | P |   | 6.463121 |
| 6.00827  | 5.828527 | 6.147374 | 7.011001 | A | P | P | 5.605221 |

|          |          |          |            |   |   |   |          |
|----------|----------|----------|------------|---|---|---|----------|
| 10.6063  | 10.59678 | 9.910533 | 9.812793 P | P | P | P | 10.2217  |
|          |          |          | 7.785735   |   |   | A |          |
|          | 5.600907 | 2.535546 | 6.69288    | A | P | P |          |
| 5.456055 | 5.228733 | 3.116483 | 6.668969 P | P | P | P | 6.902604 |
| 5.418097 | 5.104571 | 4.202131 | P          | P | P |   | 5.060482 |
|          | 5.46346  | 4.817499 |            | P | P |   |          |
| 6.587346 | 8.427862 |          | 8.06711 P  | P |   | P | 7.820059 |
| 7.361111 | 7.678717 | 7.251093 | 7.851389 P | P | P | P | 7.168471 |
| 5.425698 | 5.629354 |          | P          | A |   |   | 5.853966 |
| 5.675826 | 5.502131 | 5.20084  | 5.522449 P | P | P | P | 5.786742 |
| 5.738524 | 6.318326 | 5.260155 | 6.545375 P | P | M | P | 6.401392 |
| 6.892988 | 6.346996 | 7.46014  | 8.674479 P | P | P | P | 7.528078 |
|          |          | 7.150999 | 7.796322   |   | P | A |          |
| 5.499461 | 4.525788 |          | A          | P |   |   | 5.62112  |
| 7.038742 | 7.024688 | 7.229158 | 2.815979 P | P | P | P | 6.551019 |
| 8.650468 | 9.464766 | 8.939343 | 8.90091 P  | P | P | P | 8.746107 |
| 6.720138 | 7.826716 | 6.335407 | 6.605335 P | P | P | P | 8.308571 |
| 5.716242 | 5.343489 | 3.999845 | P          | P | P |   | 6.437091 |
| 5.702818 | 5.443131 | 5.835011 | 6.002514 A | A | P | P | 5.327404 |
| 7.733009 | 6.961396 | 8.33079  | 8.148194 P | P | P | P | 7.182422 |
|          | 7.733547 | 8.212551 | 8.694654   | M | M | M |          |
| 5.70587  | 5.819243 | 5.403518 | A          | P | P |   | 5.897669 |
| 5.72432  | 5.973846 | 5.728844 | P          | P | P |   | 7.032953 |
| 5.541719 | 5.944346 | 6.015498 | P          | M | A |   | 6.673022 |
|          | 6.317271 |          |            | A |   |   |          |
| 9.305278 | 9.015628 | 9.387637 | 8.032831 P | P | P | P | 8.294901 |
| 12.84207 | 12.83905 | 10.88964 | 10.72012 P | P | P | P | 12.1695  |
| 12.07184 | 12.08696 | 10.99839 | 10.17625 P | P | P | P | 11.77057 |
|          | 6.440551 | 2.034631 |            | A | M |   |          |
| 6.757127 | 5.989616 | 6.081664 | 3.154891 P | P | P | M | 7.119149 |
| 5.524519 |          | 5.883498 | A          |   | A |   | 4.980081 |
| 6.366198 | 5.963274 | 5.563843 | A          | P | P |   | 6.086044 |
|          | 4.897751 |          |            | P |   |   |          |
| 6.986278 | 7.118436 |          | 5.620849 P | P |   | P | 7.600766 |
| 6.603538 | 5.214055 | 5.72498  | 5.279198 A | P | P | P | 5.68916  |
| 6.708792 | 6.781135 | 7.241826 | A          | P | A |   | 5.215305 |
| 6.988381 | 7.416028 | 6.744298 | 7.610148 P | P | P | A | 7.478443 |
| 5.891384 | 5.87927  | 6.526958 | 6.81412 A  | A | A | A | 2.690925 |
|          |          |          | 2.171523   |   |   | P |          |
| 2.900243 | 6.005627 |          | P          | P |   |   | 6.966173 |

|          |          |          |          |   |   |   |          |
|----------|----------|----------|----------|---|---|---|----------|
| 8.014553 | 8.458021 | 8.15565  | 6.821703 | P | P | P | 8.29305  |
|          |          | 4.283001 |          |   | M |   |          |
| 7.074908 | 6.679754 | 7.723415 | 8.372477 | P | P | P | 6.700734 |
| 9.183427 | 8.964232 | 9.648137 | 8.93668  | P | P | P | 9.028033 |
|          | 7.758733 | 8.530565 | 9.220593 | P | A | P |          |
| 5.444675 |          | 5.180185 | P        |   | A |   | 6.494136 |
|          | 5.919242 | 6.506479 | 7.990078 | A | P | A |          |
|          |          |          | 6.263258 |   |   | A |          |
| 7.170268 | 7.630769 | 6.86935  | P        | P | P |   | 7.803295 |
|          |          | 5.14485  |          |   | P |   |          |
|          |          |          | 6.424631 |   |   | A |          |
| 8.509067 | 9.960555 | 9.606933 | 8.524462 | P | P | P | 6.889432 |
| 7.810524 | 9.382499 | 8.402861 | 6.613244 | P | P | P | 8.373261 |
| 7.628455 | 6.480862 | 8.477496 | A        | A | M |   | 5.50698  |
| 5.104776 |          | 7.084275 | 6.776823 |   | P | P | 5.989192 |
| 6.046467 | 6.145418 | 5.711748 | 0.873433 | A | P | M | 6.899024 |
|          | 4.356811 | 5.874494 |          | P | A |   |          |
|          |          |          | 6.913176 |   |   | A |          |
| 5.483888 | 5.382867 | 5.905244 | 7.125335 | P | A | A | 5.790143 |
|          | 4.595963 | 5.855098 | 6.83054  | M | A | A |          |
| 11.14575 | 11.53368 | 9.458686 | 9.770916 | P | P | P | 10.81216 |
|          |          |          | 7.608481 |   |   | A |          |
|          | 2.104934 |          | 6.600795 | P |   | A |          |
| 10.46523 | 10.55213 | 9.94755  | 9.418049 | P | P | P | 9.94705  |
| 5.915381 | 6.168623 | 6.117256 | 7.018053 | A | P | P | 5.777532 |
| 6.597932 | 5.738982 | 5.88399  | 6.307129 | P | P | M | 6.270019 |
|          | 1.17957  |          |          | P |   |   |          |
| 8.171445 | 6.304223 | 7.313022 | P        | A | P |   | 6.84829  |
| 6.976434 | 7.795046 | 7.542203 | 8.19903  | P | P | P | 6.713956 |
| 5.181655 | 5.898122 | 6.280849 | A        | A | A |   | 2.842459 |
| 7.233747 | 6.203898 | 7.784154 | 6.438539 | P | P | P | 6.19262  |
| 6.14355  | 6.362227 | 6.416166 | 7.438354 | M | P | A | 6.690149 |
| 4.602891 |          |          | M        |   |   |   | 5.892423 |
| 6.615089 | 5.968838 | 3.176894 | 6.565909 | P | P | A | 5.219425 |
| 6.116126 | 6.66728  |          | P        | A |   |   | 6.347132 |
|          | 5.500741 |          |          | A |   |   |          |
| 5.267956 | 6.771813 | 7.142938 | 7.2285   | P | P | A | 5.922427 |
| 5.242072 | 5.51725  | 6.321669 | 6.934992 | P | P | P | 5.478877 |
| 9.100747 | 9.391251 | 9.345344 | 9.780437 | P | P | P | 10.15375 |
| 6.777896 | 6.681671 | 4.23996  | 6.309197 | P | P | P | 5.053766 |

|          |          |          |            |   |   |   |          |
|----------|----------|----------|------------|---|---|---|----------|
|          | 1.970442 | 5.58481  | 6.632308   | P | P | P |          |
| 4.188163 | 5.371805 | 3.888075 | P          | P | P |   | 5.858184 |
| 8.087109 | 9.06077  | 7.645403 | 6.955405 P | P | P | P | 7.967411 |
| 8.256616 | 8.419104 | 7.78969  | 7.292292 P | P | P | P | 8.133995 |
| 5.234703 |          |          | A          |   |   |   | 1.721003 |
| 7.050633 | 7.862114 | 7.526713 | 6.593224 P | P | P | P | 7.551626 |
| 7.640955 | 8.3381   | 7.413027 | 7.333702 P | P | P | P | 8.270181 |
| 6.640991 |          |          | A          |   |   |   | 3.064023 |
| 5.590959 | 5.572911 | 6.252144 | A          | P | M |   | 2.109723 |
| 7.547704 | 7.253816 | 7.548871 | 7.327333 P | P | P | A | 7.402906 |
| 7.892292 | 8.505618 | 6.446282 | 7.808206 P | P | P | P | 8.130164 |
|          |          | 5.965849 |            |   | A |   |          |
|          | 5.156969 |          |            | A |   |   |          |
| 6.685764 | 5.71498  | 5.266758 | A          | P | P |   | 5.982226 |
|          | 7.016417 | 4.959078 |            | A | P |   |          |
| 7.725313 | 5.350926 | 4.489047 | 6.938637 P | P | P | A | 6.204728 |
| 6.734697 |          | 2.960378 | A          |   | P |   | 6.080706 |
| 7.388736 | 9.059342 | 7.422087 | 7.111208 P | P | P | P | 7.857539 |
| 4.942314 | 4.185198 | 5.479522 | M          | P | P |   | 5.51113  |
| 7.072334 | 6.689941 | 6.086747 | 5.07552 P  | P | P | P | 7.075211 |
| 7.392271 | 7.563648 | 6.356449 | 6.978077 M | P | P | M | 6.713271 |
| 10.12733 | 9.425772 | 7.318434 | 9.279622 P | P | P | P | 9.789686 |
| 5.016986 |          |          | A          |   |   |   | 3.190474 |
| 9.964817 | 9.761668 | 9.577415 | 8.549777 P | P | P | P | 9.242714 |
|          |          | 6.502994 |            |   |   | A |          |
| 7.685039 | 8.147515 | 8.878279 | 8.295218 P | P | P | P | 7.883698 |
| 7.103941 | 6.760183 | 6.03886  | 7.013966 P | P | P | A | 6.960012 |
|          | 5.384675 |          |            | A |   |   |          |
| 5.351015 |          |          | 6.525091 P |   |   | A | 5.881806 |
| 3.197614 |          |          | P          |   |   |   | 6.170833 |
| 4.833466 |          |          | 6.289326 M |   |   | A | 5.981062 |
|          | 3.628303 |          |            | P |   |   |          |
| 6.558085 | 5.658511 | 5.543043 | P          | P | P |   | 5.692444 |
| 5.942378 | 1.510037 | 3.716669 | A          | P | P |   | 5.155422 |
| 5.967893 | 5.403347 | 4.78084  | 6.34909 A  | P | P | P | 4.43729  |
| 6.196944 | 7.219585 | 6.139956 | 2.351773 P | A | A | P | 6.847058 |
|          |          | 2.850315 |            |   | P |   |          |
| 6.432234 | 4.833719 | 6.14411  | P          | P | P |   | 5.949723 |
|          |          | 1.951812 |            |   | P |   |          |
| 6.651133 | 7.159878 | 7.977745 | 6.851454 P | A | P | A | 7.167604 |

|          |          |          |            |   |   |   |          |
|----------|----------|----------|------------|---|---|---|----------|
| 5.655771 | 7.150994 | 5.049019 | M          | P | P |   | 6.209026 |
|          | 6.097198 |          |            | A |   |   |          |
| 5.049583 |          | 5.496634 | 7.063856 A |   | A | A | 4.54566  |
| 5.726007 | 6.013356 | 5.948314 | 6.958873 P | P | P | P | 5.773734 |
| 7.049335 |          | 7.277264 | 8.050041 M |   | P | P | 7.734306 |
|          | 6.554882 |          |            | A |   |   |          |
| 10.22294 | 10.79217 | 10.03316 | 9.121407 P | P | P | P | 10.48934 |
| 6.357198 |          |          | 7.408036 A |   |   | A | 6.401235 |
|          | 6.209182 | 7.291919 |            | A | A |   |          |
| 7.462111 | 7.493119 | 7.27923  | 4.619167 P | P | P | P | 7.559206 |
| 5.850682 | 4.612533 | 5.453364 | 6.093047 A | P | P | P | 5.09973  |
|          |          | 6.265193 |            |   | A |   |          |
| 7.103223 | 6.216443 | 4.756689 | P          | P | P |   | 6.818236 |
| 7.370499 | 6.273934 | 3.866367 | 5.812222 P | P | P | M | 6.24055  |
|          | 9.036015 | 8.970888 | 9.696929   | P | P | P |          |
|          |          |          | 7.233069   |   |   | A |          |
| 7.000379 | 6.90975  | 6.593411 | 6.750675 P | P | P | P | 5.637607 |
| 8.593125 | 8.943809 | 8.468742 | 8.794823 P | P | P | P | 8.709202 |
| 10.50126 | 9.694091 | 9.575811 | 7.86343 P  | P | P | P | 8.744467 |
| 3.268385 |          | 6.293238 | P          |   | A |   | 6.267619 |
| 8.317585 | 8.529744 | 10.66305 | 11.43662 P | P | P | P | 8.768811 |
|          | 6.873869 | 7.200239 |            | P | A |   |          |
| 6.33766  | 5.974218 | 4.678329 | 5.976935 P | P | P | P | 5.530039 |
|          | 6.915947 | 5.808919 | 7.107413   | A | P | P |          |
|          |          |          | 5.50294    |   |   | A |          |
|          | 6.60979  | 5.804489 | 6.941127   | P | P | A |          |
|          | 5.000353 | 2.505608 |            | P | P |   |          |
| 5.291679 | 5.391709 | 5.102292 | 5.647858 P | A | P | P | 6.763377 |
| 6.458018 | 5.869579 | 6.934017 | A          | A | A |   | 6.022142 |
| 7.118731 |          | 6.62073  | 7.550212 A |   | P | M | 7.086837 |
|          | 5.971874 | 6.69375  |            | M | A |   |          |
| 3.593736 |          | 4.759053 | 5.341513 P |   | P | P | 5.455512 |
| 7.677947 |          | 8.684887 | 9.081455 A |   | P | A | 7.706575 |
|          | 5.451739 | 5.604271 | 6.942883   | P | A | A |          |
|          |          | 5.631305 | 6.459833   |   | A | A |          |
| 4.887097 |          | 6.132295 | 6.347929 P |   | P | P | 5.329828 |
| 6.626617 | 6.935667 | 6.465815 | 7.034936 P | A | A | P | 6.903106 |
| 3.903181 | 5.187303 | 5.925404 | 6.978849 P | A | P | P | 5.564226 |
| 8.940079 | 9.350781 | 7.903786 | 7.972497 P | P | P | P | 9.436962 |
| 7.595436 | 7.574444 | 7.901545 | 7.607062 P | P | P | P | 7.066716 |



|          |          |          |          |   |   |   |   |          |
|----------|----------|----------|----------|---|---|---|---|----------|
| 6.441315 | 5.59072  | 5.735209 | 7.073726 | A | P | P | P | 5.626834 |
| 7.286799 | 6.520626 | 7.172574 | 7.14511  | P | P | P | P | 5.815116 |
| 5.38295  | 5.34402  | 4.550233 | 4.830642 | P | P | P | P | 6.158652 |
| 10.3943  | 11.47055 | 11.20788 | 11.60529 | P | P | P | P | 11.80249 |
|          |          | 0.927246 |          |   |   | P |   |          |
|          | 7.060688 | 7.769698 |          | P | A |   |   |          |
| 9.371083 | 9.588422 | 7.956483 | 7.223578 | P | P | P | P | 9.423357 |
| 9.973038 | 9.060111 | 9.341555 | 9.880058 | P | P | P | P | 8.865606 |
| 6.082324 |          |          | A        |   |   |   |   | 4.947786 |
| 6.335615 | 6.241852 | 4.884922 | 6.499345 | A | M | P | P | 5.32005  |
| 4.916415 | 5.475113 | 5.95252  | 5.781704 | P | A | P | P | 5.683994 |
| 7.735822 | 7.245777 | 8.362556 | 7.687212 | P | P | P | A | 7.369407 |
|          |          | 3.12202  |          |   |   | P |   |          |
| 7.23204  | 7.105417 | 7.746423 | 8.291875 | M | A | A | A | 7.70053  |
| 8.221908 | 8.544912 | 6.560462 | 6.059638 | P | P | P | P | 8.365324 |
| 8.107376 | 8.097689 | 9.760666 | 10.28541 | P | P | P | P | 8.101182 |
| 6.787291 | 6.703307 | 7.826424 | 7.693574 | A | A | M | A | 5.871402 |
| 6.790895 | 6.567614 | 3.328925 | 3.716952 | P | P | P | P | 7.078895 |
| 7.747904 | 8.526656 | 9.080169 | 9.473491 | P | P | P | P | 9.36085  |
| 5.569728 |          | 6.450622 | M        |   |   | A |   | 6.000012 |
|          |          | 6.969611 |          |   |   |   | A |          |
| 7.207732 | 5.824752 | 7.115718 | 7.361192 | P | P | P | P | 5.702122 |
| 7.583587 | 6.896321 | 7.491787 | 8.868237 | P | P | A | A | 7.915866 |
| 5.647852 | 6.825865 | 1.992803 | P        | P | P | P |   | 6.583895 |
| 4.63888  | 5.032099 | 7.235134 | 7.433531 | P | P | A | A | 7.029275 |
|          | 6.622072 | 6.070486 | 6.224566 | A | A | P | A |          |
| 6.260192 | 5.599458 | 2.379146 | A        | P | P | P |   | 6.195633 |
|          | 5.954974 | 4.90648  | 6.206198 | P | P | P | A |          |
| 5.909171 | 7.173374 | 6.969645 | 7.054324 | P | P | P | A | 6.989965 |
|          | 4.646005 | 7.110092 |          | P | P | P |   |          |
| 7.184559 | 6.875417 | 7.360502 | 8.488829 | P | P | A | P | 7.028403 |
|          | 4.261342 |          |          | P |   |   |   |          |
| 8.118882 | 9.404557 | 8.483097 | 7.557638 | P | P | P | P | 9.17883  |
| 5.922195 | 5.618491 |          | 7.258088 | P | A |   | A | 5.962621 |
| 6.584995 | 4.750616 | 6.473783 | 6.734641 | P | P | A | P | 6.860882 |
| 8.09898  | 6.8559   | 8.517513 | 9.068132 | P | P | P | A | 8.241241 |
| 6.038534 | 5.967581 | 6.381067 | 6.871713 | P | P | P | A | 5.932857 |
|          | 6.016037 | 5.470884 |          | P | P | P |   |          |
| 6.322321 | 6.525754 | 6.199507 | P        | A | A | P |   | 6.831269 |
| 8.86686  | 8.608892 | 8.028592 | 9.165946 | P | P | P | P | 8.62663  |

|          |          |          |          |   |   |   |   |          |
|----------|----------|----------|----------|---|---|---|---|----------|
| 5.528608 | 4.401683 |          |          | P | M |   |   | 6.565376 |
|          |          | 2.758106 |          |   |   | P |   |          |
| 8.9436   | 9.619742 | 8.715307 | 8.223107 | P | P | P | P | 9.266199 |
| 7.936352 | 8.045061 | 8.143182 | 7.344747 | A | P | P | A | 6.710724 |
| 4.997698 |          |          | 4.748352 | A |   |   | M | 4.772255 |
| 10.81124 | 10.74426 | 10.21069 | 9.546138 | P | P | P | P | 10.65028 |
| 4.239367 |          |          |          | P |   |   |   | 6.085928 |
|          | 4.627493 | 5.517282 | 5.598806 |   | A | A | P |          |
| 5.995956 | 4.451192 | 5.571338 | 5.395632 | P | P | P | P | 5.363683 |
|          | 6.343085 |          | 4.952999 |   | A |   | M |          |
| 5.525398 | 5.58594  | 5.425427 | 4.885047 | A | P | P | P | 4.294872 |
| 7.174176 | 6.517921 | 7.652398 | 7.705608 | P | P | P | P | 6.286434 |
| 7.180781 | 8.397126 | 7.797394 | 8.018115 | P | P | P | P | 8.702366 |
| 4.961872 | 5.972167 | 6.608404 | 6.822065 | P | P | A | P | 6.844355 |
| 6.736149 |          | 7.076938 | 7.093048 | A |   | A | A | 5.83581  |
|          |          |          | 6.899302 |   |   |   | A |          |
|          | 4.364142 |          |          |   | P |   |   |          |
| 7.559157 | 6.646738 | 5.923465 | 7.54015  | P | P | P | A | 6.887967 |
| 6.786274 | 5.543627 | 6.565922 | 6.485035 | P | A | A | P | 6.345487 |
|          |          | 2.79817  |          |   |   | P |   |          |
| 6.513168 | 6.714716 | 6.168125 | 6.5587   | P | P | P | P | 6.504978 |
| 9.061751 | 9.680956 | 7.073706 | 7.375656 | P | P | P | P | 9.251338 |
|          | 5.106305 | 5.589349 | 3.679664 |   | P | A | M |          |
| 5.975421 |          | 5.699645 |          | A |   | P |   | 4.677828 |
|          | 4.114451 | 6.036436 |          |   | P | M |   |          |
| 6.942846 | 7.139386 | 5.476711 | 6.403041 | P | P | P | P | 6.684676 |
|          | 5.729095 | 3.017041 |          |   | M | P |   |          |
|          | 5.011621 | 3.987787 |          |   | A | P |   |          |
| 3.090878 |          |          | 4.1347   | P |   |   | P | 5.969501 |
|          | 1.307776 | 6.010025 |          |   | P | A |   |          |
| 6.048216 | 5.150909 | 6.193583 | 6.658629 | P | P | P | A | 5.888238 |
| 4.013538 | 5.234334 |          | 5.486259 | M | P |   | P | 6.532529 |
|          |          |          | 6.891226 |   |   |   | A |          |
| 10.70202 | 11.80107 | 10.83787 | 9.40091  | P | P | P | P | 10.94336 |
| 8.045731 | 8.530764 | 8.435282 | 8.80203  | P | P | P | P | 8.068046 |
| 10.95752 | 11.44125 | 11.31472 | 10.56441 | P | P | P | P | 12.02171 |
|          | 5.228166 | 5.719648 | 5.726987 |   | A | P | A |          |
| 7.350037 | 7.978858 | 6.243352 | 5.756248 | P | P | P | P | 7.388697 |
| 6.554093 | 7.39132  | 6.146033 | 7.377738 | P | P | P | P | 6.2241   |
| 6.659794 | 5.8632   | 6.25314  | 3.133553 | P | P | A | P | 6.334726 |

|          |          |          |          |   |   |   |   |          |
|----------|----------|----------|----------|---|---|---|---|----------|
| 6.824976 | 6.708057 | 9.045436 | 8.947337 | A | P | P | A | 6.604892 |
| 6.519678 | 6.453957 | 5.142537 | 5.004479 | P | P | P | P | 6.359136 |
|          | 5.728509 | 5.245757 | 6.240007 |   | P | P | A |          |
| 7.682448 | 7.780973 | 6.603425 | 6.691142 | P | P | P | P | 7.406473 |
|          | 2.660422 |          |          |   | P |   |   |          |
| 5.063842 | 4.887666 | 5.987918 | 1.661022 | P | P | P | P | 6.679502 |
| 7.215794 | 6.92449  | 6.787816 | 6.102834 | P | P | P | P | 6.515706 |
| 6.780579 | 6.748005 | 6.951958 | 5.033096 | P | P | P | P | 5.97001  |
|          |          | 5.958829 |          |   |   | A |   |          |
| 2.070306 |          |          |          | P |   |   |   | 6.025547 |
| 9.731175 | 9.996481 | 9.628404 | 8.664381 | P | P | P | P | 10.24948 |
| 6.423013 | 7.65608  | 7.113568 |          | P | P |   |   | 7.58053  |
| 7.729002 | 6.140773 | 7.888498 | 7.671261 | P | P | P | P | 7.118592 |
| 7.31614  | 7.145977 |          | 6.315296 | A | P |   | M | 6.59561  |
| 6.517483 | 5.876289 | 6.48392  | 7.479446 | P | P | P | P | 6.637432 |
| 7.114867 | 6.828011 | 5.895325 | 5.461804 | P | P | M | M | 6.851102 |
| 6.780837 | 6.200257 | 5.923537 | 4.075266 | P | M | P | P | 6.362754 |
| 6.523955 |          | 7.940059 | 7.498274 | M |   | P | M | 6.817096 |
| 9.067231 | 7.69361  | 7.734488 | 7.284165 | P | P | P | P | 8.801748 |
| 12.81819 | 12.87977 | 10.47549 | 10.98658 | P | P | P | P | 13.07293 |
| 6.176054 | 6.638799 | 6.820685 | 5.611701 | P | P | P | P | 6.207025 |
| 6.087662 | 6.532392 | 7.379037 | 7.200352 | A | A | A | A | 2.821696 |
| 5.322725 |          |          |          | A |   |   |   | 1.736816 |
| 7.819981 | 8.055058 | 8.635458 | 9.458667 | P | P | P | P | 8.531109 |
| 6.230101 | 6.113771 | 2.168912 | 4.995556 | P | P | P | P | 7.218415 |
| 5.734342 | 5.632938 | 4.476249 | 5.974062 | A | P | P | P | 5.036895 |
|          | 7.750624 | 3.507582 |          | P | P |   |   |          |
| 6.605436 | 6.688857 | 6.122431 | 6.37436  | P | P | P | P | 6.144568 |
| 4.760779 |          | 5.785008 |          | A |   | A |   | 1.087211 |
| 6.548186 | 6.890861 | 6.600171 | 6.45451  | P | P | P | P | 6.382262 |
| 5.543998 | 2.311077 | 6.44561  |          | P | P | P |   | 5.783752 |
|          |          | 6.053225 | 6.881086 |   |   | A | A |          |
| 7.952855 | 8.10486  | 6.893722 | 7.244307 | P | P | P | P | 8.157651 |
| 7.93264  | 8.47737  | 6.702583 | 6.281666 | P | P | P | P | 8.488522 |
|          | 6.328501 | 5.960653 |          | A | M |   |   |          |
| 7.737477 | 7.507022 | 7.136987 | 3.449858 | P | P | P | P | 7.435432 |
|          |          | 4.98473  | 6.761307 |   | P | P | A |          |
| 6.247614 | 6.246855 | 5.038281 |          | A | P | P |   | 5.626083 |
| 7.058626 | 7.182401 | 6.954094 | 6.019042 | P | P | P | P | 6.230435 |
| 5.811441 | 5.626291 |          |          | M | A |   |   | 4.829873 |

|          |          |          |          |   |   |   |   |          |
|----------|----------|----------|----------|---|---|---|---|----------|
| 5.186692 | 5.038531 | 5.411454 | 5.917677 | P | A | A | P | 6.046475 |
| 6.417629 | 5.562404 | 6.435531 | 6.659117 | P | P | P | M | 6.405984 |
| 5.718351 | 5.48409  |          |          | A | P |   |   | 3.874282 |
| 9.207737 | 9.3202   | 8.503844 | 8.23824  | P | P | P | P | 9.163499 |
| 10.605   | 11.73747 | 9.426801 | 9.631093 | P | P | P | P | 11.95772 |
| 8.273285 | 8.363537 | 6.54653  | 7.692903 | P | P | P | P | 9.152789 |
|          | 6.538895 |          |          | A |   |   |   |          |
| 5.687007 | 3.215216 |          |          | A | P |   |   | 5.966851 |
| 7.356117 | 6.68287  | 6.893887 | 6.827828 | A | P | P | A | 6.849483 |
|          | 6.074503 |          | 1.606322 |   | M |   | P |          |
| 8.220332 | 8.981784 | 8.431828 | 6.960768 | P | P | P | P | 8.894333 |
| 5.33845  | 5.157195 |          |          | A | A |   |   | 1.169225 |
|          | 1.739928 |          |          |   | P |   |   |          |
| 7.54164  | 8.722688 | 7.980671 | 7.050416 | P | P | P | P | 7.813521 |
| 7.474359 | 7.561406 | 7.340809 | 6.2067   | P | P | P | P | 7.380996 |
|          | 5.592728 | 3.57964  |          |   | A | P |   |          |
| 6.604757 |          | 3.856142 | 7.138647 | A |   | P | A | 3.783933 |
|          | 5.948294 |          |          |   | A |   |   |          |

---

| 14DPI_co<br>ntrol_NS | 21DPI_co<br>ntrol_NS | 28DPI_co<br>ntrol_NS |
|----------------------|----------------------|----------------------|
| 10.43837             | 10.19625             | 10.66236             |
|                      | 4.628813             | 3.088997             |
| 8.348593             | 9.881962             | 9.301582             |
| 7.351439             | 7.019447             | 7.255277             |
| 4.628679             |                      |                      |
| 8.781838             | 8.333463             | 8.660914             |
| 7.228128             | 7.688589             | 7.510127             |
| 7.152675             | 6.993868             | 7.362603             |
| 7.730737             | 8.36467              | 8.543794             |
| 6.336532             | 6.319718             | 6.689109             |
|                      |                      | 6.466076             |
|                      |                      | 5.312182             |
| 3.31624              |                      |                      |
| 8.294673             | 9.28298              | 8.277659             |
| 10.57866             | 10.52798             | 9.277178             |
| 6.038244             | 5.658516             |                      |
| 6.098681             | 7.95081              | 5.509924             |
| 2.485684             | 6.755613             |                      |
| 5.620805             | 6.963                | 6.403396             |
| 9.967963             | 10.71963             | 9.587099             |
|                      | 5.547952             |                      |
| 7.189662             | 8.28312              | 7.445058             |
|                      | 6.539659             | 6.417936             |
| 8.370787             | 8.2766               | 7.457102             |
| 6.558768             | 6.531607             | 7.17788              |
|                      |                      | 4.986423             |
| 10.87157             | 10.97634             | 10.90178             |
| 8.192822             | 8.846861             | 7.5192               |
| 6.065502             |                      | 5.419255             |
| 4.696308             | 5.660033             | 6.765404             |
|                      | 5.379574             |                      |
|                      |                      | 1.280174             |
| 7.742164             | 6.993964             | 7.305211             |
| 6.624457             | 7.040059             | 7.450513             |

|          |          |          |
|----------|----------|----------|
| 6.100197 | 6.48503  | 6.07766  |
|          | 6.569689 |          |
| 3.934375 | 4.31372  | 5.589044 |
| 3.558033 |          |          |
| 6.103312 | 5.708781 | 6.037542 |
| 5.622189 | 5.191981 |          |
|          | 5.441707 | 4.907302 |
| 12.28512 | 12.13581 | 12.67294 |
| 5.593891 | 5.921361 | 5.930879 |
| 4.317908 | 6.235091 |          |
| 6.81388  | 8.286695 |          |
| 6.164358 | 6.331463 | 7.318388 |
| 6.377439 | 5.575413 | 7.155381 |
|          | 0.962839 |          |
| 5.731407 |          | 6.591637 |
| 10.40446 | 10.84494 | 10.42821 |
|          |          | 5.742765 |
|          | 5.087266 |          |
| 7.476568 | 7.810984 | 8.318363 |
| 5.941859 | 6.762758 | 6.828354 |
| 10.78672 | 10.69622 | 11.67814 |
| 8.214802 | 8.082846 | 7.628769 |
| 6.011023 | 7.302202 | 7.099045 |
| 6.019719 | 6.563107 |          |
| 6.035379 |          |          |
| 5.004021 |          |          |
| 10.0445  | 9.404312 | 10.45994 |
| 4.082356 | 6.309861 | 6.72729  |
|          | 4.50382  | 2.515057 |
| 6.291462 | 7.992545 | 6.559667 |
| 8.312958 | 9.241544 | 7.969634 |
| 6.991378 | 7.547115 | 6.301563 |
| 6.132509 |          |          |
| 4.137811 | 6.248975 |          |
|          | 5.603276 |          |
| 7.757942 | 7.624616 | 8.603587 |
| 9.496641 | 9.098999 | 10.02526 |
|          |          | 5.854428 |

|          |          |          |
|----------|----------|----------|
| 9.534575 | 10.69088 | 10.06701 |
| 2.814965 |          |          |
| 6.929264 | 7.890286 | 4.533542 |
| 5.234948 | 6.385464 | 5.197555 |
|          | 4.215184 | 7.135412 |
| 9.047985 | 8.620561 | 9.336217 |
| 5.72687  | 6.181986 | 5.807738 |
| 10.44147 | 9.993703 | 10.61553 |
|          | 4.774457 | 5.097935 |
| 5.355665 | 5.819453 | 5.552561 |
| 5.532385 | 5.647094 | 3.46861  |
|          |          | 5.605453 |
| 6.367987 | 6.370143 | 7.008398 |
| 3.815573 |          | 5.500628 |
| 9.341629 | 9.492792 | 9.418356 |
|          | 4.474903 | 5.162461 |
| 5.578626 | 5.959207 |          |
| 8.231433 | 8.332731 | 8.482581 |
| 8.289571 | 8.658009 | 7.565734 |
| 5.974767 |          | 6.182338 |
|          | 2.504103 |          |
| 5.744976 | 5.225563 | 5.568498 |
|          |          |          |
| 9.969201 | 9.987633 | 9.986561 |
| 8.427421 | 8.293331 | 8.734279 |
| 6.284198 | 7.565263 | 4.68084  |
| 9.555866 | 8.798856 | 8.750877 |
| 12.82056 | 12.54209 | 12.43293 |
| 8.537192 | 9.874155 | 8.556755 |
| 7.815161 | 7.842369 | 7.930255 |
| 6.593064 | 6.747773 | 6.375489 |
| 6.387887 | 5.742393 | 6.890811 |
| 4.927198 |          |          |
| 7.767388 | 7.465987 | 7.976779 |
| 9.357101 | 8.978866 | 9.076002 |
| 7.646774 | 7.123399 | 6.789271 |
| 5.1601   | 4.536024 | 6.803268 |
| 5.141408 | 5.955209 |          |
| 5.647763 | 5.582152 | 2.597303 |
| 5.682861 |          |          |

|          |          |          |
|----------|----------|----------|
| 7.111884 |          |          |
| 4.960145 |          | 5.336221 |
|          | 6.118221 |          |
| 5.355082 | 6.431952 | 5.626322 |
| 6.712789 | 6.481935 | 7.090258 |
| 9.823946 | 9.635763 | 9.967754 |
| 9.17065  | 9.715768 | 8.884938 |
| 9.11846  | 10.06211 | 9.512559 |
| 6.703261 | 8.089445 | 6.634858 |
| 5.971192 | 5.038162 |          |
| 5.291245 | 6.952369 |          |
| 7.125071 | 7.692401 | 7.285955 |
| 7.120211 | 6.600133 | 7.350118 |
| 7.891718 | 7.608186 | 8.631763 |
|          | 5.811898 |          |
| 5.514363 | 6.121171 | 7.122682 |
| 6.475215 | 7.308092 | 7.181698 |
| 4.925733 |          | 5.378711 |
| 5.431422 | 4.744169 |          |
|          |          | 5.964481 |
| 5.182064 |          |          |
| 8.282783 | 9.07483  | 7.620579 |
| 7.645525 | 7.080559 | 7.632703 |
| 5.560451 |          |          |
| 7.251955 | 7.969841 | 5.031048 |
| 8.467911 | 8.199801 | 9.452444 |
|          |          |          |
| 7.756678 | 8.109142 | 7.914192 |
| 6.615461 | 7.66882  | 6.738201 |
|          | 5.262509 |          |
| 2.572743 |          |          |
|          | 6.348287 |          |
| 5.165507 |          | 6.128671 |
| 4.961179 |          |          |
| 10.65136 | 10.57227 | 9.921906 |
| 6.620025 | 6.892236 | 6.103071 |
| 7.232899 | 7.694662 | 7.102641 |
|          |          | 2.476596 |
|          |          | 3.848708 |
| 6.395994 | 5.995287 | 6.319265 |



|          |          |          |
|----------|----------|----------|
|          | 5.521751 |          |
| 6.189632 | 5.701079 |          |
|          |          | 4.879561 |
| 6.833897 | 7.055985 | 7.164345 |
| 7.239579 | 7.664679 | 7.168797 |
|          | 5.507484 | 5.509161 |
|          | 5.426884 | 6.251957 |
|          |          | 1.395085 |
| 7.198122 | 7.672857 |          |
|          | 5.485756 |          |
|          | 5.886157 |          |
| 9.484062 | 9.972134 | 9.097775 |
|          |          | 5.169726 |
| 7.550865 | 7.442767 | 7.999624 |
| 7.102305 | 5.9481   | 5.033673 |
|          |          | 5.325804 |
| 6.460505 | 6.149165 | 6.195064 |
| 9.892291 | 9.35547  | 10.14331 |
| 6.211702 | 5.365731 |          |
| 5.327874 | 6.272706 | 5.012339 |
|          |          | 5.092884 |
| 10.44724 | 9.928923 | 10.38062 |
|          | 6.458536 |          |
| 6.75812  | 7.29172  | 7.443838 |
|          | 4.803741 |          |
| 7.64306  | 7.290412 | 7.535273 |
| 7.659317 | 6.031455 | 6.624328 |
|          | 6.408365 |          |
| 8.751372 | 9.64413  |          |
| 7.222354 | 7.251291 | 6.319737 |
| 10.11798 | 8.912822 | 9.662386 |
| 5.204238 |          |          |
| 7.741252 | 8.912385 | 6.814182 |
| 5.598494 | 6.771815 | 5.705605 |
|          | 6.794664 |          |

|          |          |          |
|----------|----------|----------|
| 3.143089 | 5.835637 |          |
| 5.96466  | 6.850069 |          |
| 5.627994 | 5.898379 | 5.640848 |
| 6.112577 |          | 5.636778 |
| 9.820429 | 9.743588 | 9.6146   |
| 11.17535 | 10.91014 | 11.37736 |
| 8.373787 | 8.926468 | 7.685833 |
| 6.858889 | 5.905592 | 6.141465 |
|          | 6.69348  |          |
| 7.296398 | 7.602092 | 6.827926 |
| 7.358679 | 6.571168 | 6.859061 |
| 5.932098 |          | 6.585364 |
| 5.511866 | 6.428744 |          |
| 6.703123 | 6.677038 | 6.937907 |
| 4.866305 | 5.979776 | 6.245363 |
| 6.766337 |          |          |
| 6.615608 | 6.199165 | 6.502769 |
| 6.034957 | 6.651785 | 6.37238  |
| 8.126541 | 7.561521 | 9.275976 |
| 7.010888 | 7.839097 | 6.793443 |
| 6.563942 | 7.066982 | 6.750302 |
| 10.05038 | 9.560881 | 9.432862 |
| 8.024415 | 6.970808 | 7.947894 |
| 13.85673 | 14.13671 | 13.2403  |
| 2.837163 |          |          |
| 7.575228 | 8.251194 | 8.433516 |
| 6.164146 | 6.261587 | 5.736393 |
| 5.765573 | 5.951871 | 5.363147 |
| 5.267257 |          |          |
| 9.330669 | 9.391791 | 9.976557 |
| 5.943067 | 6.601469 | 7.145541 |
| 6.396876 | 7.388346 | 6.67385  |
| 10.78901 | 10.39991 | 10.83263 |
|          | 5.668439 |          |
|          |          | 5.157877 |
| 4.897644 |          |          |
| 6.194872 |          | 6.518054 |
| 6.590877 | 7.849722 | 5.982417 |
| 5.748542 | 6.91357  | 7.23985  |

|          |          |          |
|----------|----------|----------|
| 6.370032 |          |          |
|          |          | 5.491227 |
| 11.37689 | 10.74198 | 11.70111 |
|          | 6.045335 |          |
| 4.606386 | 3.928187 | 6.951643 |
| 9.113288 | 9.5582   | 8.719178 |
| 9.958939 | 8.999703 | 9.718181 |
| 6.626719 | 6.696571 | 6.461709 |
| 5.800759 |          | 6.773935 |
| 8.237147 | 8.841099 | 8.135537 |
| 8.725888 | 9.431531 | 8.687191 |
| 7.448037 | 7.902624 | 6.754089 |
| 5.356618 |          |          |
| 7.420875 | 8.748716 | 7.827703 |
| 6.916408 | 6.985281 | 7.054709 |
| 10.18991 | 10.53395 | 9.840499 |
| 6.463947 | 6.569272 | 5.864893 |
| 6.095714 | 6.44383  | 6.060157 |
| 5.872351 | 7.015638 | 6.671012 |
| 7.560106 | 7.902366 |          |
|          |          | 6.383227 |
| 4.760844 |          | 6.243319 |
| 8.145495 | 7.938189 | 8.568913 |
| 9.537853 | 9.202268 | 9.962304 |
| 8.735082 | 8.379718 | 8.914621 |
| 5.958828 |          | 7.078525 |
| 6.062861 | 6.066123 | 6.719959 |
| 5.032575 | 5.706409 |          |
| 8.933455 | 9.142637 | 9.222769 |
| 4.326012 | 5.009753 | 5.351122 |
| 4.715941 |          | 5.691025 |
| 7.560734 | 7.698285 | 7.634375 |
| 6.592026 | 6.493215 |          |
| 11.42174 | 11.87028 | 11.35258 |
|          | 4.56755  |          |
| 5.70932  | 6.417599 |          |
| 0.320721 |          |          |
| 5.914743 |          |          |
| 4.727868 |          | 5.644698 |
|          | 6.394809 | 7.002574 |

|          |          |          |
|----------|----------|----------|
|          | 4.617816 |          |
|          | 2.11986  |          |
| 10.01858 | 9.966949 | 9.811504 |
|          |          | 1.550861 |
| 5.713628 | 6.737029 |          |
| 7.112112 | 6.965444 | 6.726317 |
| 7.958014 | 7.787596 | 7.269513 |
| 11.6813  | 11.64096 | 12.20879 |
| 6.384744 |          | 6.883447 |
| 6.560136 | 5.244064 | 6.643362 |
|          |          | 6.065623 |
| 7.421967 | 5.961525 |          |
| 5.645125 | 6.185963 |          |
|          |          |          |
| 7.050795 | 7.07981  | 7.41296  |
|          | 5.640326 | 5.137765 |
| 6.573323 | 5.573605 |          |
| 6.579537 | 5.837311 | 6.385783 |
| 11.11827 | 11.17312 | 10.79795 |
| 6.10531  | 6.458888 | 7.20512  |
| 3.951266 |          |          |
| 7.492007 | 7.082055 | 7.373965 |
| 9.904225 | 9.986628 | 8.248257 |
| 11.86818 | 11.8511  | 11.59066 |
| 5.82109  | 6.315514 |          |
| 4.757753 |          | 6.210503 |
| 5.558188 | 7.169017 | 6.126467 |
| 2.01742  |          | 5.768707 |
| 8.39781  | 8.332356 | 8.234338 |
| 6.639226 |          | 5.62674  |
| 6.460173 | 6.549065 | 4.158397 |
|          | 6.08551  |          |
|          |          | 1.801877 |
| 7.73568  | 6.483141 | 7.778465 |
| 7.421826 | 7.718118 | 7.15105  |
| 9.822981 | 9.567369 | 9.841229 |
|          |          | 3.826036 |
| 5.897772 | 6.765837 | 6.086947 |
|          |          | 5.319914 |
| 8.726673 | 8.894342 | 7.354591 |

|          |          |          |
|----------|----------|----------|
| 10.94396 | 9.665154 | 10.76097 |
|          | 5.893142 |          |
| 8.650565 | 8.991701 | 8.200274 |
| 6.383713 |          | 6.495006 |
| 4.88221  | 6.461413 |          |
|          | 2.234892 |          |
| 6.089432 | 6.310306 |          |
| 8.48807  | 8.16351  | 8.255241 |
|          | 5.185846 | 5.974145 |
| 6.174617 | 6.575961 | 7.333375 |
| 5.678932 | 6.401163 | 4.992424 |
| 4.989323 | 5.359984 | 6.274493 |
|          |          | 3.3083   |
|          | 6.045413 | 6.307227 |
| 5.411407 |          |          |
|          |          | 2.77299  |
| 5.571679 |          | 2.618989 |
| 6.353968 | 7.174288 | 6.42921  |
|          | 5.03656  |          |
| 7.466381 | 7.131339 | 7.679401 |
| 9.165076 | 10.1011  | 7.963381 |
| 7.541884 | 7.642493 | 8.060074 |
| 11.77103 | 12.45497 | 11.42278 |
| 8.64881  | 9.369856 | 8.501121 |
| 11.79249 | 11.70699 | 11.66243 |
| 6.618544 | 7.30351  | 6.290659 |
|          |          | 3.528602 |
| 7.292852 | 7.347551 | 7.765491 |
| 4.270799 | 5.823699 |          |
| 7.837233 | 9.76194  | 8.607316 |
| 10.79142 | 10.58011 | 10.13419 |
|          |          | 7.508884 |
| 9.535053 | 9.465076 | 9.617349 |
|          | 4.524719 |          |
| 8.034124 | 6.78842  | 8.155388 |
| 10.86228 | 11.2087  | 11.72059 |
| 6.620571 | 7.671325 | 7.114476 |
| 6.3112   | 7.908115 | 6.950811 |
| 6.582044 | 7.253709 | 7.36671  |

|          |          |          |
|----------|----------|----------|
| 7.652783 | 7.732275 | 7.841246 |
| 3.835896 | 5.83983  | 6.33711  |
| 7.47181  | 8.259556 |          |
|          | 6.426408 | 5.776138 |
| 8.401052 | 8.586407 | 8.836143 |
|          | 2.988157 |          |
| 5.550475 |          | 5.613744 |
| 6.509636 | 6.765631 | 5.68565  |
| 6.480464 | 5.487464 | 7.31322  |
|          | 5.028682 |          |
| 7.466867 | 7.890303 | 7.26929  |
| 6.536449 | 6.029224 | 6.517371 |
| 8.26876  | 8.665046 | 7.876748 |
| 5.699051 | 6.713008 |          |
| 4.847225 |          |          |
| 6.024781 |          | 4.965162 |
| 5.928869 |          | 6.460911 |
| 6.417723 | 5.835425 | 6.275202 |
| 5.805003 | 6.511721 | 5.86363  |
|          | 6.155245 |          |
| 10.91273 | 10.69093 | 10.66908 |
| 6.434613 | 6.482143 |          |
| 6.814928 | 8.264183 | 6.613901 |
| 5.542355 | 4.902509 | 6.457561 |
| 8.366594 | 7.766912 | 8.179349 |
|          | 5.437541 |          |
| 8.688467 | 8.318411 | 8.564526 |
| 6.553525 | 7.272714 |          |
|          | 5.857875 | 1.287263 |
| 5.542997 | 5.160976 |          |
| 5.826308 | 5.760882 |          |
| 5.749205 | 6.240173 | 5.657833 |
| 10.35677 | 11.05578 | 11.09097 |
| 5.774393 | 5.633922 | 5.647674 |
|          | 5.376127 |          |
|          |          | 5.309873 |
| 4.486314 | 5.176358 |          |
| 7.789137 | 6.877951 | 7.363798 |

|          |          |          |
|----------|----------|----------|
| 8.539025 | 8.329599 | 8.49279  |
|          | 6.131338 |          |
| 4.141105 | 5.998784 |          |
| 6.486884 | 6.555046 | 4.099081 |
| 9.422888 | 10.31695 | 9.267134 |
| 9.431564 | 8.717605 | 8.966619 |
| 7.538154 | 6.3759   | 6.892851 |
| 4.674837 |          | 5.208067 |
| 4.810242 | 4.978315 | 4.413162 |
| 5.948651 | 6.27552  | 5.924526 |
|          | 1.726909 |          |
| 5.76465  | 6.718249 | 7.210212 |
| 10.46953 | 10.3835  | 10.42788 |
| 5.930996 | 6.517586 | 6.57048  |
| 5.319234 | 7.143818 | 6.357677 |
| 12.86895 | 12.5997  | 13.01014 |
| 5.612181 |          | 6.090863 |
| 7.794906 | 8.776627 | 7.824825 |
|          | 3.004475 | 5.922765 |
| 11.43727 | 11.83857 | 10.35398 |
| 5.897716 | 6.217272 | 6.606908 |
| 8.822763 | 8.629988 | 8.70672  |
| 6.007893 | 6.174529 | 6.774436 |
| 6.004738 | 6.554207 | 6.256831 |
| 5.900749 | 5.524258 |          |
|          |          | 6.049963 |
| 7.786065 | 6.363673 | 7.131259 |
|          | 5.072579 | 5.39997  |
| 5.119314 | 5.757483 |          |
| 6.199927 | 6.831608 | 3.722905 |
| 10.39571 | 9.979103 | 10.55314 |
| 5.900486 | 5.970921 | 6.014531 |
| 5.8437   | 5.972589 | 6.483662 |
|          | 6.01434  |          |
| 8.87975  | 9.200173 | 9.042229 |
|          | 4.627973 |          |
| 6.978097 | 6.514296 | 7.680584 |
| 5.557038 | 4.521362 | 5.875729 |
| 7.062247 | 7.791439 | 6.167733 |

|          |          |          |
|----------|----------|----------|
| 6.811096 | 5.996435 | 6.781351 |
| 11.24105 | 10.06874 | 11.14322 |
| 8.831957 | 9.724849 | 9.413148 |
| 7.688813 | 7.995538 | 7.939038 |
|          | 1.714586 |          |
| 6.889055 | 6.92285  | 7.614676 |
| 9.48229  | 9.568688 | 9.437518 |
| 5.917284 |          |          |
| 10.97655 | 11.43052 | 10.91444 |
| 14.06922 | 13.73532 | 14.10249 |
| 6.999383 | 7.667207 | 7.608757 |
| 8.889038 | 8.329984 | 8.48689  |
| 7.392193 | 7.135919 | 7.654827 |
| 4.519115 |          |          |
| 11.54087 | 11.77273 | 11.75744 |
| 7.581392 | 7.343423 | 7.967275 |
| 6.464448 | 7.389929 | 6.383367 |
| 7.162668 | 7.685853 | 7.685604 |
| 7.49192  | 8.679353 | 7.557925 |
| 11.66993 | 11.23013 | 11.39794 |
| 9.833674 | 9.304969 | 9.616    |
| 11.34596 | 11.22617 | 11.40057 |
| 5.546934 | 6.401757 | 5.524654 |
| 13.98755 | 13.6107  | 13.7806  |
| 12.57999 | 12.76712 | 11.40608 |
| 11.17203 | 10.70566 | 10.60081 |
| 7.193355 | 7.052884 |          |
| 8.135201 | 9.384505 | 7.572133 |
| 6.714671 | 7.638858 | 6.218121 |
| 6.826045 | 5.787705 | 7.18965  |
| 5.682519 | 6.61822  | 4.980996 |
| 7.866897 | 6.478941 | 7.39463  |
| 7.821075 | 8.789186 | 7.654079 |
| 5.697435 |          | 4.93172  |
| 4.349433 |          |          |
| 12.82354 | 12.50596 | 12.22973 |
| 9.808757 | 9.603086 | 10.0148  |
| 7.255262 | 7.263118 | 7.183832 |
| 9.702274 | 9.721898 | 9.592698 |



|          |          |          |
|----------|----------|----------|
| 6.7051   | 5.920256 | 7.811431 |
|          | 6.941045 |          |
| 8.040422 | 8.172435 | 8.099288 |
| 8.266999 | 8.932801 | 8.765121 |
| 9.103517 | 9.59157  | 9.349118 |
| 11.26827 | 10.89994 | 11.27223 |
| 7.142856 | 6.643765 | 7.412151 |
| 12.82519 | 13.08754 | 12.64414 |
| 7.514474 | 6.513447 | 6.559516 |
| 7.806305 | 6.601    | 8.064808 |
| 8.650287 | 10.50198 | 7.369704 |
| 8.70106  | 8.317175 | 8.978375 |
| 9.633    | 10.183   | 9.572701 |
| 9.811823 | 10.35512 | 9.786538 |
| 9.737568 | 8.766624 | 9.321007 |
|          |          | 5.954864 |
| 8.604329 | 7.975963 | 8.168979 |
| 4.974077 | 6.550907 |          |
| 5.178651 | 5.662487 | 4.68855  |
| 5.025854 | 5.898581 | 6.323404 |
| 6.69096  | 6.777913 | 6.843667 |
| 7.919348 | 7.492441 | 8.349566 |
| 10.41141 | 11.04104 | 10.77209 |
| 5.291812 | 6.009722 | 5.928276 |
| 5.270975 | 6.816911 | 6.386025 |
| 9.648076 | 9.828934 | 9.916528 |
| 5.243498 | 5.218782 | 6.580939 |
| 7.524448 | 6.325595 | 8.075519 |
| 8.165257 | 9.64957  | 7.067854 |
| 7.631886 | 7.766521 | 8.152172 |
|          | 6.45115  |          |
| 5.757677 | 8.93548  | 6.460472 |
| 7.526898 | 9.263202 | 7.892002 |
| 11.71151 | 11.40866 | 11.71147 |
| 2.405004 |          |          |
| 6.058463 | 5.458721 | 6.29269  |
| 10.04138 | 9.930406 | 10.09861 |
| 6.797036 | 7.116074 | 6.906508 |
|          |          | 6.820219 |
| 9.694076 | 8.398386 | 9.618872 |

|          |          |          |
|----------|----------|----------|
| 7.435918 | 9.201184 | 7.726253 |
| 7.634155 | 7.320405 | 7.315091 |
| 5.453546 | 5.430721 | 4.172737 |
| 7.685601 | 7.713417 | 8.390996 |
| 5.900373 | 6.077415 | 6.617165 |
| 6.944236 | 7.449276 | 7.553619 |
| 6.636602 | 7.302636 | 7.541874 |
| 6.331845 | 6.223492 | 7.131248 |
| 7.263342 | 7.879765 | 7.582665 |
| 5.823128 | 5.708476 | 6.842897 |
| 5.789546 | 5.539316 | 6.825487 |
|          | 5.191638 |          |
| 9.663626 | 11.04576 | 8.624988 |
| 5.796335 | 6.495839 | 6.342271 |
|          | 5.507384 | 5.156776 |
| 6.093859 | 6.829873 | 6.544211 |
| 7.358356 | 7.5312   | 7.636848 |
| 6.317253 | 6.80231  | 7.051139 |
| 6.401465 | 6.1482   |          |
| 10.36992 | 9.48815  | 10.46767 |
| 10.73291 | 10.37158 | 11.41417 |
| 12.44526 | 13.06288 | 12.59217 |
| 4.854464 | 5.599365 | 6.511097 |
|          | 5.195229 | 4.282908 |
| 7.095931 | 7.255273 | 7.315272 |
|          | 7.017777 | 6.630172 |
|          | 6.152568 | 5.476725 |
| 7.562693 | 7.604109 |          |
| 8.764428 | 8.399753 | 8.126265 |
| 6.391168 | 5.839563 |          |
| 12.29765 | 12.46394 | 12.62625 |
| 9.371872 | 9.620847 | 10.16114 |
| 8.327045 | 8.68737  | 8.758372 |
| 7.083606 | 6.808336 | 8.089488 |
| 10.56235 | 10.61652 | 11.53482 |
| 9.005314 | 9.01216  | 8.399854 |
| 6.410357 | 6.329597 | 6.36064  |
| 6.056506 | 6.141537 | 5.570267 |
| 6.776332 | 7.435228 |          |
| 9.025902 | 8.850795 | 9.204547 |

|          |          |          |
|----------|----------|----------|
| 8.793191 | 8.703513 | 9.243981 |
|          |          | 4.870554 |
|          |          | 5.93052  |
| 5.548958 | 5.952749 |          |
|          | 6.708286 | 6.877978 |
| 7.789558 | 9.438476 | 6.424533 |
| 7.759858 | 7.918171 | 7.906262 |
| 6.613513 | 6.616862 | 7.251911 |
| 6.886764 | 7.538009 | 6.659269 |
| 6.121333 | 5.626993 | 5.515477 |
|          | 5.570085 | 6.483395 |
| 5.622162 | 6.678676 | 6.051139 |
| 7.871619 | 7.308274 | 7.795836 |
| 9.759684 | 10.28008 | 10.37475 |
| 8.718096 | 8.189269 | 8.640526 |
| 10.12394 | 11.09071 | 9.840366 |
| 6.182744 | 6.621979 | 6.173115 |
| 6.786329 | 6.395584 | 6.63727  |
| 6.410231 | 5.960756 | 7.242818 |
| 9.963806 | 9.676054 | 10.1197  |
| 9.725638 | 9.578593 | 10.03159 |
| 5.405669 |          | 6.815767 |
| 3.446818 |          |          |
| 8.165627 | 6.017235 | 7.716689 |
| 5.642155 | 5.962851 | 5.292273 |
| 12.86271 | 12.52037 | 13.10047 |
| 9.057833 | 9.933865 | 8.218527 |
| 8.588232 | 9.773785 | 9.10545  |
|          |          | 5.540334 |
| 7.206811 | 7.149836 | 7.507865 |
| 5.272401 | 6.779179 | 6.437165 |
| 8.194466 | 8.591884 | 7.994959 |
| 8.7544   | 8.509383 | 8.669222 |
| 5.188708 | 4.37456  | 5.331629 |
| 5.300011 | 6.693317 | 5.813265 |
| 8.301908 | 7.150664 | 8.217376 |
|          |          | 4.824244 |
|          | 5.912568 |          |
| 6.218695 | 6.535571 | 6.183633 |

|          |          |          |
|----------|----------|----------|
| 8.30045  | 8.736993 | 9.120747 |
| 6.790263 | 5.763261 |          |
| 10.54625 | 11.28776 | 10.21876 |
| 10.19663 | 10.90695 | 9.551006 |
| 7.542916 | 8.287225 | 7.665261 |
| 9.590264 | 9.259284 | 9.695088 |
| 10.03597 | 9.636562 | 9.98616  |
| 6.586665 | 7.091093 | 6.192557 |
| 10.7723  | 10.9408  | 10.50067 |
| 6.644388 | 6.879096 | 7.60686  |
| 12.60319 | 12.63875 | 12.71479 |
| 5.631949 | 4.083364 | 6.031072 |
| 7.782036 | 8.783874 | 8.379951 |
| 4.269477 | 4.94215  | 5.635892 |
| 5.556063 | 6.484609 | 5.637561 |
| 10.10347 | 10.3715  | 10.35605 |
| 6.754221 | 7.802437 | 7.617278 |
| 5.491839 | 6.603818 | 7.073178 |
| 6.493954 | 7.671955 | 7.263631 |
| 8.677178 | 9.393383 | 7.824134 |
| 6.460461 | 6.854565 | 5.831063 |
| 6.897094 | 7.406709 | 7.81913  |
| 8.927917 | 9.221855 | 7.993761 |
| 10.36499 | 10.4794  | 10.50935 |
| 12.51848 | 12.15806 | 12.49822 |
| 8.39122  | 8.84295  | 7.87895  |
| 8.531403 | 8.35144  | 8.771602 |
| 11.47986 | 11.91567 | 10.33409 |
| 13.95492 | 14.09585 | 13.95995 |
| 5.557258 |          |          |
| 8.720693 | 8.620585 | 8.818001 |
| 6.140494 | 5.953849 | 5.625241 |
| 7.153413 | 8.017735 | 8.046407 |
| 6.556277 | 5.780402 |          |
| 7.033948 | 5.700463 | 6.790487 |
| 9.257937 | 8.845937 | 9.184185 |

|          |          |          |
|----------|----------|----------|
| 5.922566 | 5.188003 |          |
| 7.378304 | 8.215348 | 7.811378 |
| 5.145793 | 5.47525  |          |
| 9.174971 | 9.070098 | 9.71013  |
| 6.089659 | 5.825377 | 5.243927 |
| 8.16471  | 8.355054 | 8.252179 |
| 10.63438 | 10.56493 | 10.73664 |
| 9.61924  | 8.621714 | 9.32626  |
| 5.614111 |          |          |
|          | 5.206299 | 5.180399 |
| 11.04749 | 11.16087 | 10.9804  |
| 3.085067 | 5.299451 | 6.158019 |
| 0.431846 | 3.41042  |          |
| 11.23715 | 11.01772 | 11.63605 |
| 11.31114 | 11.34058 | 11.52672 |
| 5.209499 | 5.347371 |          |
| 8.36063  | 8.122203 | 8.932952 |
|          |          |          |
| 8.720452 | 8.28372  | 8.761044 |
| 7.023929 | 7.290594 | 7.040268 |
| 8.300471 | 8.574034 | 8.732821 |
| 6.166176 | 5.921595 | 5.792673 |
| 10.73091 | 10.48978 | 10.90478 |
| 6.481683 | 5.934748 | 6.319303 |
| 11.9841  | 11.81004 | 12.63675 |
| 6.574016 | 6.546624 | 7.314129 |
| 9.040731 | 8.883033 | 8.501246 |
| 10.40349 | 9.824654 | 10.11958 |
| 7.578843 | 7.886447 | 7.175623 |
| 5.61166  | 7.242529 | 6.620512 |
| 8.261161 | 8.341669 | 9.16161  |
| 10.31385 | 9.674586 | 10.18377 |
| 6.412176 | 6.039374 | 5.977574 |
| 10.27167 | 9.574843 | 10.45061 |
|          | 7.438526 | 7.330116 |
| 7.717468 | 8.946197 | 7.807953 |
| 12.13242 | 11.91992 | 12.25129 |
| 6.464935 | 7.965334 | 6.720373 |
| 5.833633 | 6.172498 | 5.801194 |
| 9.711606 | 10.36398 | 10.05936 |

|          |          |          |
|----------|----------|----------|
| 7.956686 | 7.843782 | 7.618264 |
| 5.911628 |          |          |
| 6.503291 |          |          |
| 8.595349 | 8.188272 | 8.031825 |
| 10.08551 | 10.81838 | 9.951747 |
| 5.215472 | 6.377492 | 6.157407 |
| 6.57071  | 7.691412 | 6.8908   |
| 8.673271 | 8.991699 | 8.610978 |
| 7.606589 | 7.879568 | 7.805391 |
| 6.594042 | 8.262602 |          |
| 5.987171 | 5.299127 | 4.812653 |
|          | 6.693493 | 6.081837 |
|          |          | 5.874623 |
| 6.718312 | 7.007039 | 7.305964 |
| 7.793403 | 7.568243 | 7.746788 |
| 5.628438 | 5.748535 | 5.800619 |
| 9.881917 | 10.19344 | 10.10933 |
|          |          | 5.182736 |
|          | 6.632915 | 6.231329 |
| 7.652598 | 7.737499 | 7.155002 |
| 6.025795 |          | 6.296793 |
| 10.71965 | 10.67808 | 11.0841  |
| 6.056283 | 6.94899  | 6.255906 |
| 5.008593 |          |          |
| 6.048322 |          | 6.402447 |
| 10.1654  | 11.19166 |          |
| 6.359148 | 6.586101 |          |
| 5.497159 | 6.300735 |          |
| 11.47415 | 11.56033 | 11.04461 |
| 7.260595 | 6.788574 | 6.257358 |
| 7.112647 | 7.112362 | 7.1246   |
| 6.026298 |          |          |
| 7.705716 | 8.379403 | 7.91213  |
| 8.341192 | 8.656087 | 8.247911 |
| 11.86745 | 11.98139 | 12.30676 |
| 6.174765 | 6.727642 | 6.272598 |
| 7.098441 | 6.925007 | 6.986157 |
| 6.478295 | 6.124928 |          |
| 6.327287 | 7.059103 | 6.072062 |
| 7.403221 | 8.808799 |          |

|          |          |          |
|----------|----------|----------|
| 4.820379 |          | 5.680776 |
| 12.02035 | 11.99342 | 11.63519 |
| 7.90455  | 8.711154 |          |
| 5.752185 | 6.915305 | 6.334851 |
| 7.057219 | 8.156793 | 7.55769  |
| 8.815187 | 9.575115 | 8.700638 |
| 11.07447 | 10.81685 | 11.17982 |
| 7.893466 | 8.14497  | 7.931612 |
| 8.628023 | 9.239148 | 8.414558 |
|          | 5.905074 | 6.376509 |
| 6.622743 | 5.704565 | 6.364702 |
| 4.714914 |          |          |
| 6.360117 | 7.032128 | 6.853355 |
|          |          |          |
| 9.748226 | 9.389437 | 9.151587 |
| 9.048485 | 9.114832 | 9.248016 |
| 7.713376 | 7.543509 | 7.780794 |
| 8.384032 | 8.84282  | 9.023049 |
| 10.61096 | 10.60171 | 10.34239 |
| 4.325507 |          |          |
| 10.69263 | 10.54923 | 11.11005 |
| 5.683308 | 4.045826 |          |
|          | 5.51849  |          |
| 5.397643 |          | 6.43636  |
|          |          | 3.631194 |
| 11.66473 | 11.19669 | 11.27299 |
| 10.68789 | 10.2189  | 10.2259  |
| 6.16049  | 6.350354 | 7.412853 |
| 9.952395 | 10.46835 | 9.798405 |
| 10.56102 | 10.10582 | 10.81502 |
| 5.39103  |          |          |
| 7.033434 | 6.558843 | 6.402551 |
| 9.496994 | 10.51286 | 9.891721 |
| 12.33479 | 12.42255 | 12.4903  |
| 6.827282 | 6.829387 | 7.380258 |
| 0.571406 | 5.912549 |          |
|          |          | 4.950823 |
| 7.197084 | 7.393819 | 6.182183 |
| 8.655613 | 8.639141 | 8.747423 |
| 9.226689 | 9.673172 | 9.419039 |

|          |          |          |
|----------|----------|----------|
| 4.436337 |          | 5.045415 |
| 8.736525 | 8.832485 | 8.305625 |
| 8.639935 | 9.173979 | 8.649306 |
| 4.31528  |          |          |
| 9.856309 | 8.962132 | 9.653    |
| 6.822657 | 7.531611 | 7.286486 |
| 6.641858 | 6.68889  | 6.386373 |
| 8.043743 | 8.353384 | 7.810459 |
| 10.35083 | 10.56408 | 10.23589 |
| 8.703134 | 9.041265 | 8.78173  |
| 12.39418 | 12.35331 | 12.21396 |
| 11.7363  | 11.45827 | 11.91116 |
| 10.61356 | 10.88285 | 10.23806 |
| 6.179321 |          | 6.9944   |
| 6.94607  | 8.133913 | 7.120581 |
| 10.87151 | 10.85215 | 11.24097 |
|          |          | 5.239589 |
|          | 6.052625 |          |
| 5.661924 | 5.955837 | 5.5909   |
| 9.213926 | 9.614092 | 8.541449 |
| 10.54526 | 10.43798 | 10.4276  |
| 10.58969 | 9.896281 | 10.78769 |
|          |          |          |
| 6.098497 | 6.604207 | 6.007137 |
| 6.069524 | 5.931863 | 6.294736 |
| 9.288197 | 9.325392 | 8.762894 |
| 7.986978 | 8.003207 | 8.114678 |
| 8.367808 | 7.439467 | 6.373241 |
| 9.309568 | 9.398153 | 9.413817 |
| 7.390872 | 7.879627 | 6.569138 |
| 8.776444 | 8.991595 | 7.986103 |
| 5.928739 | 6.839484 |          |
| 11.51262 | 11.45293 | 11.96405 |
| 7.549884 | 6.647313 | 7.276319 |
| 10.46516 | 10.70353 | 10.10718 |
| 5.276804 | 7.158953 |          |
| 7.786607 | 8.516291 | 7.209102 |
|          |          |          |
| 5.689436 |          | 6.724651 |
| 8.456471 | 8.014742 | 8.690953 |



|          |          |          |
|----------|----------|----------|
| 7.321565 | 7.008836 | 7.587742 |
| 10.13044 | 9.064004 | 10.17334 |
|          | 5.846447 |          |
| 5.555077 | 6.697066 | 7.496756 |
| 12.0809  | 12.01963 | 12.39503 |
| 10.24042 | 10.61873 | 10.60094 |
| 6.954485 | 7.365955 | 6.637587 |
| 6.398894 | 7.963436 | 7.849155 |
|          |          | 9.565413 |
| 12.4036  | 12.29134 | 12.01693 |
| 4.90322  | 5.901065 |          |
| 4.534414 | 5.268807 | 5.277795 |
| 10.22756 | 10.62469 | 10.53731 |
|          | 6.064655 |          |
| 9.647713 | 9.254952 | 10.11899 |
| 5.066348 | 3.490134 | 2.401739 |
|          | 6.73557  |          |
| 7.715737 | 8.456613 | 7.442851 |
|          | 6.462519 |          |
| 6.530321 | 7.51393  | 6.185027 |
| 10.23282 | 10.11135 | 10.08996 |
| 9.810314 | 9.37744  | 9.955129 |
| 9.227664 | 9.614623 | 9.704855 |
| 0.049955 | 6.346704 |          |
| 4.931786 | 5.246128 | 5.762882 |
| 9.196454 | 9.293252 | 9.390454 |
| 7.933082 | 9.611747 | 6.622469 |
| 8.955586 | 9.19194  | 8.906734 |
| 7.314789 | 7.484338 | 7.991323 |
| 8.529391 | 8.808422 | 9.509835 |
| 9.218202 | 9.564909 | 8.816473 |
| 11.67442 | 11.60484 | 12.22379 |
| 10.08878 | 9.829634 | 10.38872 |
| 9.085566 | 9.181261 | 9.119678 |
|          | 7.215688 |          |
| 7.71149  | 9.713882 | 8.59478  |
| 9.41448  | 9.146173 | 8.7742   |
|          |          | 0.737272 |

|          |          |          |
|----------|----------|----------|
| 10.19668 | 10.82924 | 9.944723 |
| 9.595194 | 9.70294  | 9.75168  |
| 1.887846 | 5.883012 |          |
| 8.384699 | 8.100904 | 7.613458 |
| 7.617097 | 8.159745 | 8.225842 |
| 9.774987 | 10.01939 | 9.440426 |
| 7.149135 | 8.48339  | 8.444472 |
| 8.959632 | 9.326365 |          |
| 6.974498 | 7.580184 | 7.181584 |
| 9.312692 | 9.185877 | 9.830495 |
| 4.78416  | 5.148725 |          |
| 10.70651 | 11.24128 | 10.18607 |
| 5.636936 | 6.107885 | 6.704109 |
| 7.683658 | 7.522285 | 7.673614 |
| 9.166657 | 9.336395 | 9.647023 |
| 6.135704 | 7.579129 | 6.881396 |
| 9.71766  | 9.693017 | 9.210919 |
|          | 7.022745 | 5.646217 |
| 7.005716 | 8.071921 | 6.884636 |
|          |          | 4.437728 |
|          | 5.187856 | 5.879851 |
| 10.41308 | 10.24277 | 10.40875 |
| 10.24744 | 10.42574 | 10.10764 |
| 9.002413 | 9.140698 | 8.810461 |
| 7.31756  | 7.655608 | 6.59639  |
| 5.992376 | 6.890362 | 6.883222 |
| 5.079529 | 5.391343 | 5.581731 |
| 7.860863 | 9.602666 | 7.279744 |
| 10.18882 | 10.0146  | 10.31519 |
| 9.151986 | 9.313029 | 9.453985 |
| 6.928373 | 6.081258 | 7.604138 |
| 6.122331 | 5.570057 | 6.702024 |
| 5.025561 | 6.515409 | 6.711086 |
| 6.707785 | 6.756409 | 7.250767 |
| 9.547711 | 8.922672 | 8.822358 |
| 5.821537 | 6.378246 | 6.827548 |
| 6.066748 | 5.433474 | 5.620497 |
| 6.959465 | 7.697889 | 7.555474 |
| 7.593952 | 8.23733  | 7.882524 |
| 7.780815 | 8.495448 | 7.93696  |

|          |          |          |
|----------|----------|----------|
| 9.430291 | 9.76385  | 9.081872 |
| 9.967925 | 8.905697 | 10.52699 |
| 9.881247 | 9.04765  | 9.813476 |
| 4.732183 |          |          |
| 5.481339 | 6.464999 | 6.22188  |
|          |          | 5.095233 |
| 13.59372 | 14.01067 | 13.66506 |
| 5.702308 | 6.5167   | 6.361726 |
| 9.101687 | 9.419219 | 9.295184 |
|          |          | 6.569552 |
|          |          | 4.670036 |
| 12.15628 | 11.91767 | 12.07319 |
| 10.9869  | 10.69937 | 11.08381 |
| 8.839353 | 9.039047 | 9.111791 |
| 7.415971 | 7.155721 | 6.363951 |
| 6.149899 | 5.623001 | 6.631621 |
| 7.179885 | 7.555757 | 6.496293 |
| 8.601838 | 7.031924 | 8.116605 |
| 6.266495 |          | 6.462464 |
| 8.058258 | 8.244183 | 8.402665 |
| 8.548808 | 9.600578 | 8.015258 |
| 10.11579 | 9.644678 | 10.598   |
|          | 4.728722 | 6.336818 |
| 5.240663 | 5.696517 | 5.01225  |
| 7.491804 | 7.346153 | 7.402751 |
|          | 5.521505 | 5.927698 |
| 7.546876 | 6.941452 | 7.730692 |
| 9.344268 | 8.63806  | 9.242569 |
| 6.706361 | 6.950214 | 7.030133 |
| 10.00125 | 10.29756 | 9.835351 |
|          | 5.099495 | 5.494447 |
| 10.74043 | 10.51267 | 10.84738 |
| 8.946217 | 9.950852 | 8.745033 |
| 10.24094 | 9.921083 | 9.993855 |
| 4.802883 | 4.43226  |          |
| 6.494569 | 6.241664 |          |
| 13.00325 | 12.70966 | 13.77533 |
| 5.435234 | 5.9809   | 5.367514 |

|          |          |          |
|----------|----------|----------|
| 9.04453  | 9.861711 | 8.702575 |
| 8.07511  | 8.999188 | 8.244028 |
| 9.889454 | 9.763737 | 9.971319 |
|          |          | 4.812496 |
| 6.238413 | 6.785695 |          |
| 10.52898 | 10.33697 | 10.54146 |
| 3.60243  |          |          |
| 7.074733 | 7.508622 | 6.175327 |
| 9.614033 | 9.418701 | 9.860505 |
| 5.362704 | 6.409018 | 2.361241 |
|          |          | 6.302467 |
| 6.105241 | 6.304827 | 7.767877 |
| 9.776284 | 9.548936 | 9.219914 |
| 8.279241 | 8.322522 | 8.254792 |
| 9.182243 | 8.066595 | 9.176497 |
| 7.870955 | 7.685253 | 8.139105 |
| 12.82765 | 12.71412 | 12.69517 |
| 6.289739 | 5.884437 | 5.51843  |
| 9.576836 | 9.341011 | 9.761137 |
| 8.21991  | 9.434898 | 7.619802 |
|          | 7.253883 |          |
| 7.170463 |          |          |
| 9.202415 | 9.940452 | 8.211353 |
| 8.817737 | 8.68178  | 9.357327 |
| 9.194857 | 10.11518 | 10.17373 |
| 9.076196 | 9.003975 | 8.741552 |
| 7.492743 | 7.020758 | 7.869385 |
| 6.121949 | 6.400204 | 5.824647 |
| 7.079806 | 7.530676 | 7.494406 |
| 5.71177  |          | 6.919138 |
|          | 4.967542 |          |
| 5.760197 | 6.299478 | 4.74978  |
| 6.045879 | 4.475411 | 5.401744 |
|          | 5.97156  |          |
| 6.899176 | 7.677482 | 7.269779 |
| 8.001585 | 6.650993 | 7.324087 |
| 5.229409 |          | 5.495058 |
| 5.229061 | 5.079065 | 6.122205 |

|          |          |          |
|----------|----------|----------|
| 5.226556 | 5.621883 | 6.171508 |
| 5.976237 | 6.545869 | 1.652756 |
| 7.165874 | 7.362464 | 7.857881 |
| 6.263438 | 5.033069 |          |
| 7.640432 | 4.736289 | 8.382922 |
| 7.789216 | 7.871077 | 7.587419 |
|          | 4.65752  | 6.076512 |
| 5.100491 | 6.403587 |          |
| 6.588654 | 4.564845 | 5.146554 |
|          |          |          |
| 4.576393 | 6.214275 | 6.10989  |
| 6.402623 | 6.964136 |          |
| 5.984384 |          | 5.340772 |
| 9.023087 | 9.115379 | 9.17339  |
| 5.688915 | 5.862524 | 6.677007 |
| 12.5012  | 12.42786 | 12.05143 |
| 5.181948 | 6.075971 |          |
| 5.485488 |          |          |
|          |          | 7.164877 |
| 8.737304 | 8.596818 | 8.400439 |
| 6.64995  | 7.846726 | 7.399718 |
| 8.5265   | 8.702513 | 8.1991   |
| 8.039455 | 7.769519 | 8.348752 |
| 8.873597 | 9.326312 | 8.922994 |
| 5.678757 | 6.469906 | 5.66391  |
| 7.717722 | 7.857657 | 7.742011 |
|          |          | 5.531704 |
| 9.619756 | 9.818872 | 9.01929  |
| 4.927822 | 5.340977 |          |
| 8.340973 | 8.535676 | 7.867335 |
| 7.737521 | 7.692332 | 7.252672 |
| 11.88372 | 11.48536 | 11.68116 |
| 9.184661 | 7.813422 | 10.62308 |
| 7.819107 | 7.84764  | 7.99793  |
| 8.844641 | 8.38774  | 8.469728 |
| 11.732   | 11.59318 | 11.82685 |
| 8.633166 | 9.677445 | 9.180797 |
| 10.82779 | 10.64878 | 10.90689 |
| 10.36289 | 9.738182 | 10.29513 |
| 7.718985 | 7.369311 | 8.017457 |

|          |          |          |
|----------|----------|----------|
| 9.439072 | 8.29089  | 8.090778 |
| 9.743794 | 9.935964 | 9.967423 |
| 10.63125 | 10.65484 | 11.16488 |
| 9.667425 | 9.168826 | 10.21067 |
| 12.07501 | 12.6664  | 11.51368 |
| 7.108038 | 6.517986 |          |
| 5.674063 | 4.012279 | 6.097449 |
| 6.391561 | 6.715461 | 6.894243 |
| 4.887958 | 4.212736 |          |
| 8.218256 | 8.768898 | 8.278763 |
| 10.57684 | 11.60655 | 9.745727 |
| 12.79985 | 13.06311 | 13.09518 |
| 10.57817 | 10.81695 | 10.80474 |
| 6.48354  | 7.525586 | 8.047449 |
| 9.966964 | 9.671464 | 9.844167 |
| 9.336722 | 9.623173 | 8.790979 |
| 10.92993 | 11.09408 | 10.76976 |
| 8.846527 | 8.909885 | 8.666179 |
| 9.231863 | 9.724817 | 9.630242 |
| 11.9068  | 11.84401 | 11.9473  |
| 5.716858 | 5.919239 | 6.708229 |
| 7.857908 | 7.154524 | 6.845134 |
| 4.859134 | 5.532768 |          |
| 10.51585 | 10.09749 | 10.99239 |
| 8.902379 | 9.689244 | 8.250586 |
| 7.708463 | 7.691686 | 6.830511 |
| 5.239874 | 4.400454 |          |
| 9.941595 | 10.58891 | 9.621407 |
| 6.646988 | 6.875587 | 6.341772 |
| 6.207652 |          |          |
| 3.158041 | 5.355319 |          |
| 8.319143 | 8.230404 | 9.045048 |
| 12.75738 | 13.15034 | 11.99939 |
|          | 5.923239 | 4.3189   |
| 6.362191 | 7.180975 | 6.831706 |
| 6.782301 | 7.68587  | 6.857076 |
| 4.959868 | 6.071013 |          |
| 6.752678 | 7.048636 | 6.097105 |

|          |          |          |
|----------|----------|----------|
| 5.383478 | 7.048867 |          |
| 7.123658 | 6.967133 | 7.214077 |
| 7.373653 | 7.527965 | 7.998234 |
| 6.192127 | 6.738765 | 6.52664  |
| 2.650955 |          | 4.965369 |
| 5.969976 | 6.588505 | 6.920623 |
| 7.862366 | 8.317615 | 7.722478 |
| 10.25173 | 9.972748 | 10.22622 |
| 8.304332 | 9.110833 | 8.827424 |
| 9.379405 | 9.928858 | 10.07302 |
| 4.266235 | 6.843955 |          |
| 6.16476  |          | 7.010005 |
| 10.58528 | 11.24122 | 10.56134 |
| 9.884533 | 9.861184 | 10.70198 |
| 9.25038  | 8.391053 | 8.857198 |
| 9.585268 | 9.060675 | 9.860856 |
| 8.449146 | 7.398498 | 7.627911 |
| 9.463924 | 10.55914 | 10.02166 |
| 6.639638 | 6.533328 | 6.136054 |
| 7.390778 | 8.109075 |          |
| 6.298231 | 6.564561 |          |
| 8.075513 | 8.546375 | 8.227696 |
| 10.68982 | 10.25532 | 10.07385 |
| 9.346364 | 10.27514 | 8.653449 |
|          | 5.0641   | 4.132016 |
| 6.976834 | 6.377744 | 6.4882   |
| 8.879297 | 8.369449 | 9.502306 |
|          | 5.59603  |          |
|          | 5.506135 | 5.668493 |
| 10.88983 | 10.68002 | 11.24067 |
| 10.18195 | 9.449251 | 10.65097 |
| 7.263882 | 8.424418 | 6.678895 |
| 8.754719 | 8.392092 | 8.856885 |
| 7.110353 | 6.085594 |          |
| 6.516785 | 6.265031 | 6.432697 |
| 9.22338  | 9.600995 | 9.354863 |
| 9.2027   | 8.779023 | 8.911543 |
| 5.920526 |          | 6.57975  |

|          |          |          |
|----------|----------|----------|
| 9.03157  | 9.612332 | 9.152534 |
| 3.445036 | 5.324559 |          |
|          |          | 1.16887  |
| 5.908119 |          | 3.686429 |
| 9.902905 | 10.19364 | 10.24461 |
| 8.259155 | 8.990502 | 9.184389 |
| 7.671097 | 7.805234 | 6.8328   |
| 10.13891 | 9.599629 | 10.15196 |
| 8.482141 | 8.71442  | 8.490478 |
| 10.79904 | 11.10294 | 11.73678 |
| 5.619001 | 5.928741 | 6.340061 |
| 7.498734 | 7.707184 | 7.297994 |
| 8.120238 | 8.536731 | 7.363926 |
| 7.893937 | 7.033865 | 7.909285 |
| 6.079827 | 6.259737 | 6.247458 |
|          |          | 5.868549 |
| 5.59582  |          | 6.006656 |
| 6.43499  |          |          |
| 15.08799 | 14.97055 | 15.46106 |
| 8.903873 | 8.624846 | 9.884899 |
| 8.888069 | 9.023593 | 8.688314 |
| 9.522972 | 9.151114 | 9.375294 |
| 9.476566 | 8.659182 | 9.466229 |
| 8.337751 | 7.289125 | 8.727055 |
| 11.4142  | 11.1853  | 11.44659 |
| 8.280123 | 8.398528 | 8.292056 |
| 7.145429 | 6.927228 | 7.233043 |
| 6.024149 | 6.142635 | 6.498813 |
|          | 5.584617 | 5.184334 |
| 10.16015 | 8.233858 | 9.872274 |
| 7.771177 | 6.948673 | 8.740047 |
|          |          |          |
| 7.352297 | 7.11734  | 6.736955 |
| 8.284222 | 8.805025 | 7.570536 |
| 7.688595 | 8.149668 | 7.83277  |
|          | 5.142295 | 4.834592 |
| 9.698633 | 9.896913 | 8.378381 |
|          | 5.561923 |          |
| 6.604239 |          |          |
| 4.210477 |          |          |



|          |          |          |
|----------|----------|----------|
| 8.866565 | 9.061491 | 9.261967 |
| 8.84751  | 8.258005 | 8.685912 |
| 10.29587 | 9.968301 | 10.39114 |
| 7.699095 | 7.243372 | 7.765951 |
| 7.704213 | 7.410351 | 7.099468 |
| 9.30183  | 9.63517  | 9.630361 |
| 9.439111 | 8.822643 | 9.285463 |
| 7.944531 | 8.008959 | 7.761573 |
| 11.20075 | 10.57987 | 11.12132 |
| 8.334178 | 9.288967 | 6.493277 |
| 5.20661  | 5.957041 |          |
| 7.159295 | 7.187856 | 7.117488 |
|          |          | 3.69666  |
|          |          | 2.322025 |
| 8.918593 | 8.414711 | 9.381022 |
| 7.656824 | 7.361939 | 7.01992  |
| 1.107214 |          |          |
| 7.228549 | 6.924383 | 7.459135 |
| 9.620393 | 9.635657 | 9.68446  |
| 11.76498 | 11.86578 | 11.73734 |
| 7.94046  | 8.557848 | 7.971235 |
| 11.26414 | 11.61562 | 11.02098 |
| 8.951047 | 8.903884 | 8.924247 |
| 11.09436 | 10.41243 | 11.58378 |
| 10.96229 | 11.10685 | 11.09482 |
| 9.691421 | 9.521073 | 9.856597 |
|          |          | 3.623543 |
| 10.05308 | 10.20487 | 9.714845 |
| 6.408909 | 7.47197  | 7.4265   |
| 6.757243 | 7.599997 | 7.378147 |
| 5.812599 |          | 5.114916 |
| 5.944526 | 6.722966 |          |
| 10.24132 | 10.49311 | 10.1067  |
| 12.70013 | 12.6351  | 12.64059 |
| 6.839919 |          |          |
| 8.28032  | 8.401261 | 8.750811 |
| 5.027281 | 6.158059 |          |

|          |          |          |
|----------|----------|----------|
| 9.290265 | 9.888988 | 9.129443 |
| 7.54596  | 7.910938 | 7.563659 |
| 5.706883 | 3.453414 | 6.756398 |
| 7.680139 | 8.125689 | 7.648515 |
| 6.016506 | 6.548112 | 6.422042 |
| 7.125444 | 7.096717 | 7.390622 |
| 10.63537 | 11.60488 | 10.5592  |
| 8.059272 | 7.851457 | 7.209177 |
| 8.662715 | 8.541754 | 8.136331 |
| 6.399488 | 6.920703 | 6.50733  |
| 10.25519 | 10.59843 | 10.82054 |
| 11.51814 | 11.45962 | 10.99018 |
| 7.64877  | 7.799728 | 8.307002 |
| 8.768689 | 8.732878 | 8.005665 |
| 12.86635 | 12.88079 | 13.29983 |
| 9.647745 | 10.24205 | 10.0446  |
| 7.107152 | 8.016739 | 5.851908 |
| 12.04108 | 11.63388 | 11.98698 |
| 7.508079 | 8.04807  | 6.668623 |
| 6.299394 | 5.864044 |          |
| 11.33159 | 10.47729 | 11.07748 |
| 7.876069 |          | 8.380489 |
| 10.58125 | 10.96834 | 10.35249 |
| 8.566079 | 7.870351 | 8.673444 |
| 11.15147 | 10.92345 | 10.7734  |
| 10.84078 | 10.72453 | 10.80073 |
| 8.719358 | 8.547395 | 8.672065 |
| 8.063668 | 8.36641  | 7.526753 |
| 8.897951 | 9.414625 | 9.118113 |
| 6.923833 | 6.504528 | 6.726832 |
| 7.693364 | 7.293825 | 8.105034 |
| 9.418889 | 9.017977 | 9.977052 |
| 6.518325 | 5.506281 | 7.083086 |
| 6.89154  | 6.815288 | 7.940955 |
|          | 5.265344 | 5.792339 |
| 13.12849 | 12.69187 | 14.07412 |
| 11.25812 | 11.31428 | 11.35035 |
| 7.243142 | 8.581494 | 7.020724 |
| 9.327398 | 10.60609 | 9.203844 |
| 7.989584 | 7.224947 | 7.188998 |

|          |          |          |
|----------|----------|----------|
| 9.613292 | 9.827653 | 9.662066 |
| 4.277257 | 6.32739  |          |
| 10.88984 | 11.33218 | 10.31488 |
| 10.07049 | 10.13669 | 10.08686 |
| 5.390693 | 5.031018 |          |
| 5.587063 |          | 6.051098 |
|          | 4.489364 | 2.105347 |
| 5.900349 | 5.850964 | 6.100215 |
| 7.362187 | 8.203262 | 7.316701 |
| 6.522847 | 7.897768 | 7.141117 |
| 8.094835 | 8.28155  | 8.638709 |
| 4.214664 | 5.469532 |          |
| 5.086033 | 5.29007  | 4.22826  |
| 5.425521 | 4.62751  | 0.698684 |
| 6.483069 | 7.249468 | 6.961384 |
| 14.81484 | 14.77806 | 14.41624 |
|          | 5.14776  | 4.202664 |
|          |          |          |
| 5.710692 | 8.176198 | 6.210066 |
| 10.04317 | 10.18669 | 10.13023 |
| 10.95313 | 10.7418  | 10.52713 |
| 5.814878 |          |          |
|          |          |          |
| 8.168273 | 8.085856 | 7.538292 |
| 4.897484 |          | 6.399455 |
|          | 5.544503 | 5.565527 |
| 11.4176  | 11.92204 | 11.6997  |
| 7.363243 | 7.559882 | 7.888598 |
|          | 5.548787 |          |
|          |          |          |
|          |          | 5.508481 |
| 4.61402  |          |          |
| 6.11495  | 5.732499 | 5.997322 |
| 5.512794 | 7.146023 |          |
| 6.482974 | 7.098895 | 6.142036 |
|          |          |          |
| 5.836444 | 6.331356 | 6.327284 |
|          |          |          |
| 6.38658  |          | 6.056509 |
|          | 5.494775 |          |

|          |          |          |
|----------|----------|----------|
| 4.770836 | 5.898643 | 5.582864 |
|          | 5.731093 |          |
| 8.948212 | 8.65417  | 9.274123 |
| 6.34758  | 6.526358 | 5.387412 |
| 5.853129 |          | 5.134369 |
| 10.0902  | 9.785575 | 9.713747 |
| 5.954787 | 6.199563 | 2.85414  |
| 3.484812 |          |          |
| 5.420031 |          |          |
| 6.547725 | 6.302791 | 6.398446 |
|          | 3.020899 |          |
| 6.392826 |          | 3.438345 |
| 4.402698 |          | 6.435854 |
|          |          | 6.822443 |
| 5.839603 | 5.838848 | 6.104235 |
| 4.601327 | 5.74626  | 5.985824 |
| 4.898465 | 5.863272 |          |
| 5.895271 | 6.33337  | 5.967735 |
|          | 4.937486 |          |
| 6.253705 |          |          |
|          |          | 2.164304 |
|          |          | 5.022537 |
| 7.257524 | 7.571728 | 7.272222 |
| 9.03391  | 8.466012 | 7.422842 |
|          |          | 8.154453 |
|          | 6.231848 | 6.750801 |
|          | 3.560932 |          |
| 8.051662 | 7.866102 | 9.555649 |
| 7.206869 | 6.935467 |          |
|          |          | 3.00869  |
| 6.713204 | 7.293371 | 7.31488  |
| 6.935846 | 5.843994 | 5.627226 |
| 8.196963 | 9.241438 | 7.163331 |
|          | 5.105833 |          |
| 6.512336 | 5.000036 | 6.728227 |
| 6.117616 |          | 6.417205 |
| 6.433334 | 7.25257  | 8.150732 |
| 5.287345 | 5.792737 |          |
| 6.451769 | 6.052275 |          |
| 9.904946 | 10.13239 | 10.73763 |

|          |          |          |
|----------|----------|----------|
| 9.284814 | 9.908134 | 9.964484 |
|          |          | 6.032826 |
| 5.649746 | 6.115554 | 5.649008 |
| 6.345569 |          | 6.240056 |
| 6.123837 | 6.548312 | 6.466386 |
| 9.274411 | 9.214996 | 9.109617 |
|          | 5.09455  |          |
| 4.712135 | 5.941338 | 5.695836 |
| 9.079229 | 9.817036 | 9.317504 |
| 6.911781 | 6.225455 | 7.620648 |
| 6.094607 |          |          |
| 8.077952 | 8.334436 | 8.527095 |
| 7.843741 | 8.236759 | 7.871468 |
| 8.709519 | 8.220726 | 8.234523 |
|          |          | 4.103638 |
| 11.07795 | 9.997659 | 10.61032 |
| 7.365077 | 7.203527 | 6.665224 |
|          |          | 6.16608  |
| 7.397774 | 7.810726 | 7.27811  |
|          | 6.123663 |          |
| 6.987266 | 8.337968 | 9.092011 |
| 5.856865 | 3.366227 |          |
| 6.282016 | 5.679232 | 6.820702 |
| 5.679596 | 4.805752 | 5.580555 |
| 9.29039  | 10.0247  | 9.006182 |
|          |          | 6.11242  |
| 4.32235  | 5.871673 | 5.528445 |
| 5.006552 |          | 5.761988 |
|          | 3.313978 | 6.24038  |
| 6.384011 | 6.335353 | 6.212128 |
| 6.990374 | 7.187331 | 6.559336 |
|          |          | 5.850843 |
| 7.591676 | 8.363991 | 6.713446 |
| 7.453108 | 7.525267 | 8.509058 |
| 5.518289 |          |          |
| 5.967631 | 5.4435   | 4.522156 |
| 5.168503 | 6.042137 |          |
| 6.735939 | 7.060304 | 7.349274 |

|          |          |          |
|----------|----------|----------|
| 9.712163 | 9.577325 | 10.09342 |
| 9.003544 | 9.285725 | 8.831763 |
| 4.902814 |          | 4.420375 |
| 6.151207 | 6.123526 | 6.232741 |
|          | 6.033906 |          |
| 6.463191 | 7.166805 | 5.612105 |
| 8.69434  | 9.051723 | 9.005363 |
| 10.06634 | 8.838778 | 10.01692 |
| 4.657724 |          |          |
| 12.55413 | 12.56151 | 12.28645 |
| 7.752533 | 7.729127 | 7.904399 |
| 13.96569 | 13.36889 | 14.34645 |
| 8.888068 | 8.728152 | 8.28461  |
| 11.05588 | 10.50307 | 11.26566 |
| 11.16332 | 11.00202 | 10.9435  |
| 6.367914 |          | 4.21111  |
| 9.4738   | 9.42242  | 8.655871 |
| 7.597302 | 9.121228 | 6.930693 |
|          | 6.45222  | 7.643675 |
| 7.90255  | 8.545703 | 7.758014 |
| 6.708555 | 7.030509 | 6.300498 |
| 5.801256 | 6.204073 |          |
| 7.935248 | 7.952977 | 7.79275  |
| 7.458237 | 7.633527 | 8.007365 |
| 7.812614 | 9.098288 | 9.049755 |
| 5.836279 | 7.672748 | 5.698959 |
| 7.155968 | 6.735589 | 7.396701 |
| 6.090391 | 5.765414 | 7.966949 |
| 4.686792 |          |          |
|          | 3.631961 |          |
|          | 5.783851 |          |
| 4.708034 |          |          |
| 9.641863 | 10.04767 | 9.854053 |
| 7.810396 | 10.55532 | 9.973421 |
| 5.706866 | 5.195573 | 5.691901 |
| 5.417627 | 6.513172 |          |
| 6.880243 | 6.475196 | 6.694791 |
| 4.347226 |          |          |
| 7.130638 | 7.403982 |          |

|          |          |          |
|----------|----------|----------|
| 7.445657 | 8.369708 | 6.789991 |
| 7.026912 | 7.48524  | 6.456929 |
| 9.016782 | 9.093658 | 8.398131 |
| 12.34922 | 12.11844 | 12.30298 |
| 7.992408 | 7.586076 | 8.356391 |
| 9.718145 | 10.79512 | 10.23006 |
| 8.625517 | 8.84546  | 8.731236 |
| 6.139474 | 5.975022 | 6.604231 |
| 2.014958 |          |          |
| 5.629958 | 6.086553 | 6.2999   |
| 6.352194 | 6.359405 | 6.413175 |
| 0.274732 | 6.87127  | 6.922257 |
| 4.935673 | 5.913009 | 5.228086 |
|          | 6.159722 |          |
| 5.364008 |          |          |
| 8.556839 | 9.116712 | 8.629244 |
|          |          | 6.104908 |
|          |          | 3.294913 |
| 4.396085 | 5.595971 | 6.005877 |
| 8.16355  |          | 8.145929 |
| 5.963704 |          |          |
| 4.872532 | 5.420986 |          |
| 9.958839 | 10.03326 | 10.73781 |
| 6.04192  | 7.767579 | 6.408752 |
| 10.10092 | 10.02106 | 9.885421 |
| 8.728327 | 7.654982 | 7.554226 |
| 11.11849 | 11.18293 | 11.45774 |
| 10.75376 | 10.48622 | 10.49577 |
| 8.536863 | 8.752427 | 8.704512 |
| 7.599991 | 7.900747 | 8.709937 |
| 6.21205  | 6.92263  | 7.411486 |
|          | 4.765351 |          |
| 12.37891 | 12.48929 | 12.74779 |
| 8.841651 | 9.175503 | 8.548968 |
| 10.19774 | 9.615992 | 9.737525 |
| 11.77996 | 12.21497 | 12.14219 |
| 7.299441 | 7.371986 | 6.676425 |
| 9.301244 | 9.05601  | 8.536497 |
| 7.288563 | 7.439321 | 7.740657 |

|          |          |          |
|----------|----------|----------|
| 7.190061 | 7.052002 | 7.891404 |
| 7.034223 | 7.246152 | 7.120935 |
| 8.47891  | 8.251938 | 8.1206   |
|          |          | 6.779917 |
| 1.446767 |          | 5.211811 |
| 8.060058 | 8.667255 | 7.399865 |
|          |          | 5.253179 |
| 5.299115 | 5.351612 | 5.529404 |
| 6.498722 | 6.179074 | 4.927477 |
| 8.523473 | 7.574839 | 7.437414 |
| 7.384947 |          |          |
| 6.377595 |          | 7.031665 |
| 5.734369 | 5.926839 | 5.469893 |
| 3.48837  | 3.041656 |          |
|          | 6.439903 |          |
| 8.073136 | 8.082735 | 7.921152 |
| 8.954316 | 9.140141 | 9.217008 |
| 6.838487 | 7.00043  | 6.510335 |
| 11.17384 | 11.17739 | 11.17104 |
| 11.82337 | 12.00188 | 11.69983 |
| 10.91872 | 11.53348 | 10.42035 |
| 9.124538 | 9.513344 | 9.908177 |
| 3.190338 |          |          |
| 7.488203 | 7.564414 | 8.062349 |
| 6.708276 | 6.857276 |          |
| 5.245079 | 6.024109 |          |
| 8.192479 | 8.922509 | 7.951702 |
| 10.5046  | 10.47904 | 10.59512 |
| 6.677995 | 7.771452 | 7.863482 |
| 5.857648 | 6.576884 | 6.020183 |
|          |          | 5.53507  |
| 10.75084 | 11.48804 | 10.30573 |
|          | 3.08332  | 5.934898 |
| 8.245916 | 9.468209 | 7.134056 |
| 5.644433 | 5.416344 | 5.70563  |
| 8.030414 | 7.379583 | 8.183889 |
| 8.465022 | 7.524323 | 6.661818 |
|          | 5.808294 |          |
| 6.060672 |          | 5.723952 |



|          |          |          |
|----------|----------|----------|
| 8.158622 | 7.810448 | 8.628216 |
| 8.971173 | 7.860537 | 8.411695 |
| 7.440032 | 7.878045 | 8.002969 |
| 9.548944 | 8.717052 | 10.26617 |
| 6.257379 | 7.198809 | 5.932321 |
| 9.151019 | 8.63625  | 9.574049 |
|          |          | 4.931665 |
| 7.954738 | 8.493236 | 7.318926 |
|          |          | 6.150854 |
| 4.357427 |          |          |
| 5.284748 | 5.950071 |          |
| 5.502936 | 6.044295 | 6.558876 |
|          |          | 6.801152 |
| 8.745643 | 8.344768 | 9.170095 |
| 4.881804 | 6.590701 | 5.94072  |
| 9.044923 | 9.001791 | 9.239996 |
| 6.445203 | 6.116254 | 6.90975  |
| 9.653926 | 9.192365 | 9.723276 |
| 6.012474 | 6.104012 | 5.918241 |
| 12.52907 | 12.70919 | 12.30645 |
| 5.608714 | 6.30893  | 5.335785 |
| 8.276285 | 8.141068 | 7.789341 |
| 8.617993 | 8.787077 | 8.144466 |
| 6.116808 | 6.473415 | 7.26325  |
| 9.65749  | 9.404696 | 9.097271 |
| 5.889237 | 6.205442 |          |
|          |          | 2.792952 |
|          | 5.920834 | 4.615058 |
| 7.381685 | 8.174395 | 8.277403 |
| 6.02847  | 5.110249 | 4.649453 |
| 5.82176  | 7.290134 |          |
| 7.669845 | 8.425222 | 7.202598 |
| 8.843091 | 7.902273 | 8.548873 |
| 6.369276 | 6.781674 | 6.537868 |
| 9.753247 | 8.9981   | 9.265574 |
| 7.206042 | 8.572717 | 8.657005 |
| 8.57082  | 7.906974 | 8.921474 |
|          | 6.262605 |          |
| 10.70917 | 10.88121 | 10.51498 |

|          |          |          |
|----------|----------|----------|
|          |          | 1.596165 |
| 8.049708 | 8.241901 | 9.042713 |
| 8.748603 | 9.241322 | 8.373352 |
| 10.29693 | 9.546658 | 10.33042 |
| 7.570415 | 7.997203 | 7.872006 |
| 9.655417 | 9.444036 | 9.137021 |
| 8.973869 | 8.971655 | 9.238511 |
| 8.374623 | 8.292925 | 8.66711  |
| 8.485417 | 10.06581 | 6.745452 |
| 7.452622 | 7.945074 | 7.473599 |
| 8.435358 | 7.968549 | 9.322949 |
| 8.374695 | 10.4385  | 8.071086 |
|          |          |          |
| 4.299395 | 5.640498 | 5.869789 |
| 6.126048 | 6.413912 | 7.53021  |
|          |          | 6.041957 |
|          |          | 6.090157 |
| 6.982794 | 7.506765 | 7.018832 |
| 7.963616 | 7.642826 | 7.607009 |
| 8.372732 | 9.291298 | 8.176207 |
|          |          | 6.938539 |
| 9.295746 | 9.300292 | 9.335991 |
| 10.73652 | 11.39652 | 10.05428 |
| 5.056842 | 3.543304 | 4.778389 |
| 6.526645 | 6.917263 | 6.173843 |
| 6.352794 | 5.545142 | 6.398639 |
| 5.539724 | 5.83402  | 6.407085 |
|          |          |          |
| 4.166921 | 5.066564 |          |
| 7.340004 | 6.634269 | 7.191246 |
| 6.384643 |          |          |
| 7.553238 |          |          |
| 7.260294 | 8.370962 | 7.343337 |
| 7.896174 | 8.12938  | 7.332926 |
| 7.510303 | 7.338922 | 7.743654 |
| 8.293551 | 8.549751 | 8.757288 |
| 4.232063 | 4.250457 |          |
| 7.024817 | 7.254067 | 7.271671 |
| 8.952524 | 9.29369  | 8.487092 |
| 10.48974 | 9.923188 | 10.31728 |

|          |          |          |
|----------|----------|----------|
| 11.60806 | 11.39601 | 11.82422 |
| 8.119377 | 8.229225 | 7.858707 |
| 11.24535 | 11.01714 | 9.938938 |
|          | 4.949567 | 7.360774 |
| 12.499   | 12.63882 | 12.5577  |
|          | 6.956133 | 6.242331 |
| 9.721968 | 10.31913 | 10.13542 |
| 7.399319 | 6.925923 | 8.091832 |
| 8.5514   | 8.98248  | 8.36443  |
| 6.774071 | 2.506753 | 7.109332 |
| 3.881686 | 5.823521 |          |
| 11.87787 | 12.10873 | 11.25579 |
| 9.865955 | 9.924612 | 9.647141 |
| 7.899036 | 7.436785 | 7.064294 |
|          | 5.522196 |          |
| 8.092497 | 8.216796 | 9.004294 |
| 6.207743 | 6.042481 | 7.106951 |
| 10.51523 | 10.7615  | 10.45163 |
| 10.48131 | 11.03927 | 10.67224 |
| 6.816193 | 5.937776 |          |
| 8.670195 | 8.223129 | 9.15592  |
| 10.63447 | 10.58261 | 10.46088 |
| 5.918004 | 7.057541 |          |
| 6.965216 |          | 8.27497  |
| 9.635219 | 9.570345 | 9.659665 |
|          |          | 5.585911 |
| 7.250523 | 7.658519 | 7.847669 |
| 6.605314 | 6.505793 | 8.31462  |
| 5.55039  |          |          |
|          | 5.405181 | 6.410497 |
| 8.073174 | 7.448432 |          |
| 5.841827 |          |          |
| 8.920861 | 8.695315 | 8.938964 |
| 7.781487 | 7.374094 | 7.928443 |
| 10.22927 | 10.3507  | 9.996008 |
|          | 6.431143 | 5.786518 |
| 7.22695  | 7.338441 | 7.608142 |
|          | 5.974417 | 3.377292 |
| 8.793747 | 9.383749 | 7.378085 |
| 6.669672 | 6.386076 |          |

|          |          |          |
|----------|----------|----------|
| 6.67437  |          | 6.500559 |
| 8.540731 | 8.912725 | 8.266382 |
| 7.957694 | 8.126997 | 7.684286 |
|          | 5.898863 | 4.00997  |
| 5.771359 | 5.495914 | 5.39194  |
| 6.413611 | 7.229768 | 7.18306  |
| 6.661132 | 7.324777 | 6.548506 |
|          | 5.348121 |          |
| 9.727277 | 9.849241 | 9.751997 |
| 9.342903 | 9.076289 | 9.686797 |
| 8.530037 | 7.218103 | 8.593329 |
| 9.259195 | 9.051836 | 8.264869 |
| 7.385334 | 7.720296 | 6.32707  |
| 8.878634 | 8.452118 | 8.542399 |
| 9.102092 | 7.970022 | 9.317351 |
| 8.156652 | 8.236812 | 8.28509  |
|          | 5.438212 |          |
| 7.799367 | 7.992092 | 7.964843 |
| 6.432812 | 7.185432 | 5.774808 |
| 5.346533 |          |          |
| 5.996965 |          |          |
| 9.643477 | 10.08025 | 9.850396 |
| 8.215039 | 8.693619 |          |
| 6.604921 | 5.841995 | 6.784635 |
|          |          | 7.714054 |
| 4.815399 | 5.176742 |          |
| 8.385713 | 10.18546 | 8.863933 |
| 8.681327 | 9.025575 | 8.228786 |
| 9.57468  | 9.090591 | 9.142722 |
| 6.817908 | 6.497512 |          |
| 8.302632 | 8.455296 | 8.383005 |
| 4.686142 |          | 6.765097 |
| 12.50812 | 12.85942 | 12.36193 |
|          | 5.743661 |          |
|          | 5.465777 | 6.050855 |
| 11.36789 | 11.2318  | 11.6106  |
| 11.36479 | 11.60839 | 11.47278 |
| 11.18081 | 11.40758 | 10.67524 |
| 6.497875 | 8.200885 | 7.586942 |
| 10.36853 | 10.44901 | 10.67736 |

|          |          |          |
|----------|----------|----------|
| 3.849113 |          |          |
| 6.497809 | 6.77379  | 6.810728 |
|          |          |          |
| 9.921482 | 9.753269 | 9.804777 |
| 9.640426 | 9.180476 | 9.478313 |
| 10.34981 | 10.53118 | 10.79034 |
|          |          | 5.580895 |
| 6.184076 | 5.535018 | 6.123065 |
| 8.419014 | 8.157447 | 8.83938  |
| 5.660769 | 4.941632 |          |
| 10.34414 | 10.33287 | 10.35909 |
| 9.697558 | 9.451763 | 9.24012  |
| 6.80967  | 5.725449 | 7.093956 |
| 9.735119 | 9.219605 | 8.82645  |
| 5.306908 |          |          |
| 10.97813 | 11.07246 | 10.7276  |
| 10.76177 | 10.95468 | 10.31815 |
| 7.81304  | 7.972324 | 8.77704  |
| 7.176104 | 6.938618 | 7.004898 |
| 7.391828 | 7.434505 | 7.288178 |
| 9.17362  | 10.14938 | 8.397675 |
| 9.980802 | 9.932991 | 10.30305 |
| 8.673014 | 8.757496 | 8.531659 |
| 8.090262 | 7.347466 | 8.602207 |
| 9.434411 | 9.873304 | 9.171371 |
| 10.64213 | 10.66163 | 10.6369  |
| 6.618602 | 7.119809 | 5.842742 |
| 9.645662 | 9.676685 | 9.73519  |
| 8.301959 | 8.565565 | 7.744507 |
| 8.657681 | 8.852386 | 8.830977 |
| 7.319655 | 7.988549 | 8.4805   |
|          | 6.120668 | 3.05856  |
| 6.119136 | 6.707127 |          |
| 5.024399 | 5.719233 | 6.783691 |
| 7.68446  | 7.647742 | 8.08882  |
| 9.060913 | 8.217863 | 9.023478 |
| 5.849883 | 6.372287 | 6.215115 |
| 11.63916 | 11.45658 | 11.50366 |
|          | 4.860434 |          |
| 12.43346 | 12.42118 | 12.62048 |

|          |          |          |
|----------|----------|----------|
| 6.864024 | 5.510327 | 6.596363 |
| 13.65527 | 10.30034 | 13.90375 |
| 12.5203  | 9.110318 | 12.33603 |
| 7.276533 | 8.971024 | 8.360369 |
| 11.01133 | 10.87974 | 10.91001 |
|          | 5.381229 |          |
| 6.720169 | 7.734659 | 6.574672 |
| 9.859125 | 9.964381 | 10.42936 |
| 7.608387 | 7.842507 | 7.429249 |
| 8.075746 | 7.091343 | 6.475295 |
| 5.061731 | 5.098678 |          |
| 7.88384  | 8.404001 | 7.789691 |
| 2.770664 | 6.047313 | 5.899771 |
| 5.264391 |          | 5.521924 |
| 8.834553 | 8.736874 | 8.835341 |
| 6.390472 | 7.178223 | 7.044229 |
| 10.68502 | 10.28789 | 10.84964 |
| 5.126662 | 6.392072 |          |
| 7.3992   | 7.921373 |          |
| 8.0033   | 8.400037 | 7.702286 |
|          | 4.724537 | 6.595008 |
| 7.006046 | 7.254551 |          |
| 10.43919 | 11.15355 | 10.13278 |
| 5.510033 |          | 6.379224 |
| 7.014032 | 7.068691 | 6.793269 |
| 8.487101 | 8.194763 | 8.15022  |
| 9.569787 | 9.057965 | 8.847543 |
| 7.586669 | 7.415762 | 7.462325 |
| 9.798773 | 10.92368 | 10.71201 |
| 5.908537 | 6.62348  | 6.328815 |
| 7.571115 | 7.866915 | 7.021659 |
| 11.38864 | 11.38213 | 11.46512 |
| 11.61404 | 11.12487 | 11.23576 |
| 5.164911 | 5.31911  | 5.600638 |
| 8.912659 | 8.723975 | 9.462338 |
| 11.41017 | 11.50278 | 11.4956  |
| 8.371883 | 9.824728 | 8.794661 |
| 5.711551 | 6.780941 |          |
| 6.490036 | 6.612461 | 6.976333 |
|          | 5.749278 |          |

|          |          |          |
|----------|----------|----------|
| 10.3749  | 10.43595 | 9.871802 |
| 5.774703 | 6.879753 | 7.076785 |
| 7.24943  | 7.315797 | 8.095027 |
| 5.853218 | 7.079965 |          |
|          |          | 5.547649 |
| 8.106464 | 7.618714 | 7.693769 |
| 11.11858 | 10.97754 | 11.11885 |
| 10.10628 | 9.708123 | 9.817163 |
| 9.268367 | 8.354186 | 10.08021 |
| 6.425636 | 6.579798 | 5.896933 |
| 6.169501 | 6.4486   |          |
| 6.886708 | 7.334736 | 7.024192 |
| 6.929326 | 6.653075 |          |
| 8.659811 | 8.951909 | 8.73311  |
| 9.090665 | 9.248854 | 9.211269 |
| 6.569554 | 6.218301 | 7.51404  |
| 10.54922 | 10.66606 | 10.42501 |
| 5.859152 | 5.858063 | 6.742276 |
| 3.150151 |          |          |
| 9.253088 | 10.14632 | 7.803516 |
| 7.157432 | 6.412304 | 7.006131 |
| 6.951334 | 6.548281 | 6.604983 |
| 5.896095 | 6.295756 |          |
| 9.516089 | 9.153321 | 9.280136 |
| 4.921971 | 5.466848 |          |
| 9.189969 | 8.493323 | 9.259683 |
| 4.778173 | 5.936725 |          |
| 6.814758 | 7.081356 |          |
|          | 4.961864 |          |
| 9.714217 | 10.33655 | 10.60058 |
| 4.428979 |          | 5.991429 |
| 8.11686  | 7.914326 | 8.286707 |
| 9.946049 | 10.33488 | 10.19391 |
| 6.676838 | 7.363011 |          |
| 8.489767 | 9.043736 |          |
| 6.0282   |          |          |
| 8.989176 | 8.861153 | 8.725705 |
| 6.650232 |          |          |
| 7.004025 | 6.589294 |          |
| 6.940468 | 7.098563 | 8.022641 |

|          |          |          |
|----------|----------|----------|
| 9.040319 | 9.359171 | 8.929657 |
| 7.667729 | 8.45811  | 7.613082 |
| 9.85637  | 9.890545 | 9.739182 |
| 5.0772   | 6.305768 |          |
| 4.074174 | 6.047868 |          |
| 5.76479  | 5.369368 |          |
| 8.382007 | 9.58321  | 7.844688 |
| 12.5548  | 12.55939 | 12.54291 |
| 6.964493 | 7.293795 | 7.268333 |
| 8.234418 | 7.956849 | 8.663339 |
| 8.701938 | 8.133251 | 8.391242 |
| 8.227903 | 8.340875 | 8.038875 |
| 8.387224 | 8.894767 | 7.710416 |
|          | 7.067913 | 6.967053 |
| 8.285891 | 8.874582 | 8.519219 |
|          |          |          |
| 10.88212 | 10.59527 | 11.23296 |
| 5.786822 |          |          |
|          |          | 5.0398   |
|          |          | 5.378226 |
| 8.897855 | 8.404123 | 8.948636 |
|          | 6.626778 |          |
| 6.401164 | 7.238146 | 5.372683 |
|          | 4.086603 |          |
| 7.837387 | 7.102121 | 7.772182 |
|          |          | 4.538046 |
| 9.336052 | 9.49304  | 9.218239 |
| 10.57992 | 10.92375 | 9.814065 |
| 10.25617 | 9.732586 | 9.945423 |
| 5.896121 |          |          |
|          |          | 9.859653 |
| 13.21083 | 13.18176 | 12.87074 |
| 10.0367  | 10.20132 | 9.307261 |
| 10.51561 | 9.799527 | 10.28285 |
| 7.064315 | 8.240822 | 8.042448 |
| 8.692133 | 9.513016 | 8.036037 |
| 8.910193 | 8.949594 | 8.231267 |
| 5.376926 | 6.45753  | 6.418842 |
| 5.574052 | 5.097455 | 7.068902 |



|          |          |          |
|----------|----------|----------|
| 11.4533  | 10.82413 | 11.38567 |
| 10.09976 | 10.66911 | 9.100383 |
| 5.745498 | 4.94064  |          |
| 7.775082 | 7.923729 | 7.796526 |
| 7.160327 | 6.980984 | 6.140985 |
| 7.572538 | 8.187522 | 7.506056 |
| 8.396918 | 7.494128 | 7.277387 |
| 7.897908 | 6.995374 | 7.971436 |
| 7.479368 | 8.038053 | 7.738263 |
| 10.6333  | 9.898369 | 10.38377 |
| 7.504727 | 6.910183 | 7.800993 |
| 13.08148 | 12.71284 | 12.97748 |
|          | 6.573227 |          |
| 11.22086 | 11.579   | 11.26122 |
| 8.470737 | 8.112879 | 8.296694 |
|          | 5.625239 | 5.558556 |
| 9.098618 | 8.844557 | 9.020055 |
| 8.422793 | 8.77198  | 8.601918 |
| 7.851513 | 8.105425 | 7.911479 |
| 5.789339 | 7.069758 | 7.587747 |
|          | 5.100669 | 6.139886 |
| 6.241259 | 5.995189 | 6.40497  |
| 6.188472 | 6.552609 | 7.264941 |
| 8.044498 | 7.659812 | 7.6923   |
| 8.071558 | 7.515003 | 7.884503 |
| 6.715626 | 6.504186 | 7.545077 |
| 7.149025 | 7.474688 | 7.029236 |
|          |          | 7.543266 |
| 4.191183 |          |          |
| 8.710677 | 9.613601 | 9.464528 |
| 9.357136 | 10.40723 | 9.41208  |
|          | 6.312954 |          |
| 7.107369 | 7.126861 | 6.238465 |
| 7.877848 | 8.181584 | 8.031439 |
| 11.15883 | 11.05959 | 10.4682  |
| 4.693126 | 7.18681  |          |
| 6.279953 | 7.660903 | 6.491507 |
| 9.354898 | 8.931974 | 9.191121 |

|          |          |          |
|----------|----------|----------|
| 6.700126 | 7.186284 | 6.200795 |
| 6.995823 |          |          |
| 4.283333 | 6.709701 | 5.628819 |
| 10.68794 | 10.08895 | 10.33444 |
| 5.159775 | 5.911232 |          |
| 6.715974 | 6.262951 | 7.435561 |
|          |          | 5.055255 |
| 11.10887 | 10.47184 | 11.51049 |
| 8.717677 | 9.21495  | 8.896366 |
| 10.30274 | 10.08139 | 10.64652 |
| 7.535381 | 6.760094 |          |
| 8.632552 | 8.491724 | 8.633661 |
| 9.379788 | 9.171569 | 8.593267 |
| 8.21563  | 7.515815 | 8.064962 |
|          | 5.820569 | 5.507653 |
| 4.765242 | 6.955653 |          |
| 5.276577 | 6.430262 | 6.335919 |
| 7.032308 | 8.003394 | 7.618128 |
| 6.351696 | 6.471941 | 5.618323 |
| 5.520564 | 6.406633 | 6.27771  |
| 5.415018 | 6.214524 | 6.104043 |
| 7.927918 |          |          |
| 7.056419 | 7.556974 | 7.577634 |
| 10.22404 | 10.77715 | 10.34904 |
| 6.872844 | 6.363578 | 6.938914 |
| 7.346898 | 7.614097 | 7.419871 |
| 7.702112 | 6.562603 | 7.208871 |
| 0.654684 |          |          |
| 14.19202 | 13.91803 | 14.45117 |
|          |          | 6.545442 |
| 7.658919 | 8.142923 | 6.77488  |
| 11.27215 | 11.5482  | 10.70489 |
| 10.32    | 10.01002 | 10.34891 |
| 11.08069 | 10.86498 | 11.06755 |
|          | 6.127154 | 7.144871 |
| 10.75846 | 11.06938 | 10.75472 |
| 4.913424 | 5.693762 | 5.573309 |
| 7.730175 | 6.184301 | 7.602421 |
| 3.148964 |          |          |
| 2.619842 |          | 5.479219 |

|          |          |          |
|----------|----------|----------|
| 6.661557 | 6.630639 | 6.246006 |
| 7.358989 | 7.669334 | 7.269841 |
| 8.94362  | 8.277198 | 9.14187  |
| 8.015939 | 8.815588 | 7.566547 |
| 9.874898 | 9.415322 | 9.829749 |
| 8.61478  | 8.718551 | 7.936303 |
| 6.724654 | 7.123105 | 7.189285 |
| 6.42487  | 5.922874 | 7.569505 |
| 8.020329 | 7.282527 | 8.080624 |
| 8.697612 | 9.23497  | 9.766465 |
| 5.844265 |          |          |
| 5.9613   | 8.067227 | 6.632994 |
| 7.298452 | 7.743681 | 6.901813 |
| 6.078351 | 6.905808 |          |
|          |          | 5.672909 |
| 9.284185 | 9.404596 | 8.433791 |
| 11.9782  | 12.62629 | 11.63791 |
| 8.670716 | 8.107533 | 8.57863  |
| 8.19811  | 8.178161 | 7.957171 |
|          |          | 6.106797 |
|          | 5.77063  |          |
| 7.160692 | 7.4138   | 6.038926 |
| 8.032209 | 7.687764 | 8.262796 |
| 6.437267 | 6.007649 | 6.232883 |
| 6.340995 |          | 5.775531 |
| 9.263555 | 8.668815 | 9.507137 |
| 6.781601 | 6.809175 | 7.401416 |
| 13.82051 | 13.1898  | 14.07982 |
| 7.418453 | 7.840695 | 8.298257 |
| 11.63317 | 11.65097 | 11.91278 |
| 7.802605 | 9.010261 | 9.398282 |
| 3.744687 |          |          |
| 7.065954 | 8.197552 | 8.767465 |
| 6.593882 | 7.940881 | 8.736774 |
| 10.27606 | 10.09645 | 9.721954 |
| 8.176415 | 8.738772 | 8.710668 |
| 8.079414 | 7.933258 | 9.069199 |
| 7.870183 | 7.308189 | 7.817287 |
|          | 4.546587 |          |
| 8.510744 | 8.389833 | 8.120058 |

|          |          |          |
|----------|----------|----------|
| 11.48025 | 11.58447 | 11.56271 |
| 6.810278 | 6.378511 | 7.092804 |
| 10.99592 | 10.17843 | 10.84294 |
|          | 6.901601 | 6.447811 |
| 9.577967 | 9.449348 | 9.285651 |
| 9.302246 | 8.9929   | 9.119111 |
| 11.63831 | 11.59195 | 11.01017 |
| 6.549751 | 6.579181 | 6.801735 |
| 10.29278 | 10.50111 | 10.33714 |
| 4.588513 | 5.594018 |          |
| 8.481191 | 7.466131 | 8.345407 |
| 8.812702 | 8.290102 | 8.71449  |
| 10.21492 | 10.1951  | 10.20738 |
| 8.300715 | 8.215012 | 7.553886 |
| 8.502086 | 8.045308 | 8.111906 |
| 8.81999  | 8.869704 | 8.286616 |
| 9.130329 | 8.682712 | 8.402244 |
| 6.213283 | 6.608143 | 6.080473 |
| 8.75123  | 8.226984 | 9.432404 |
|          | 6.044757 | 7.185798 |
| 7.883143 | 8.5553   | 7.643726 |
| 8.424576 | 8.905005 | 8.606272 |
| 8.96587  | 9.557681 | 8.802096 |
|          |          | 5.071716 |
| 2.988376 |          | 2.645322 |
|          |          | 4.958749 |
| 7.248156 | 6.511726 | 6.331978 |
| 7.359361 | 8.690221 | 7.489942 |
| 7.684719 | 6.759503 | 8.17659  |
|          | 7.77703  | 8.091629 |
| 9.516434 | 10.34752 | 10.10893 |
| 8.534111 | 8.260613 | 8.309854 |
|          |          | 7.315167 |
| 5.059888 |          |          |
| 7.435316 | 8.569138 | 7.272857 |
| 7.725224 | 7.906736 | 8.344879 |
| 5.522631 | 6.434599 | 6.048171 |
| 10.1769  | 9.916477 | 10.04477 |
|          | 6.830025 |          |
| 7.13843  | 7.548621 |          |

|          |          |          |
|----------|----------|----------|
| 6.165213 | 6.785074 | 6.305099 |
| 6.639498 | 7.895446 | 5.987601 |
| 9.07222  | 9.238714 | 8.50456  |
| 5.272673 | 5.761779 |          |
| 8.10687  | 7.593773 | 8.333437 |
| 6.560207 | 6.342393 |          |
| 9.211276 | 8.646677 | 9.022007 |
| 9.552746 | 9.692305 | 9.127905 |
| 9.436532 | 9.308413 | 7.866123 |
| 9.960475 | 10.30212 | 10.01169 |
|          | 6.737042 |          |
|          |          | 5.458025 |
| 6.440456 | 7.39958  | 6.321154 |
| 9.514992 | 10.06445 | 9.86353  |
| 9.291265 | 8.894666 | 7.388336 |
| 8.25492  | 7.378092 | 7.691798 |
| 8.237245 | 7.633576 | 8.087807 |
| 9.380821 | 9.306011 | 9.419533 |
| 5.610555 | 5.092869 | 5.220788 |
| 11.31573 | 11.6186  | 11.06628 |
| 9.71137  | 10.0114  | 9.401365 |
| 12.65477 | 12.00325 | 13.14418 |
| 10.19494 | 11.04318 | 8.91055  |
| 6.438175 | 7.077172 | 7.133592 |
| 6.291539 | 6.113987 | 7.5573   |
| 6.413282 | 7.649369 |          |
| 5.916904 | 5.858766 | 6.272    |
| 10.60934 | 11.09075 | 10.94967 |
| 10.64357 | 11.41564 | 11.00767 |
| 7.938765 | 7.738498 | 7.826853 |
|          | 6.581954 | 1.480441 |
| 5.670634 | 5.526335 | 6.128834 |
| 7.337577 | 8.762434 | 6.872792 |
| 7.300646 | 8.119811 | 7.371112 |
| 3.847706 | 5.807549 | 5.286324 |
| 10.31658 | 10.69993 | 10.3592  |
| 6.861718 | 7.812063 | 8.594846 |
| 6.791505 | 7.60914  | 7.470738 |
| 9.215281 | 9.772509 | 9.081029 |

|          |          |          |
|----------|----------|----------|
| 7.032738 | 8.484652 |          |
| 10.11972 | 9.630511 | 10.11423 |
| 8.629472 | 9.070954 | 8.08942  |
| 5.560381 | 7.077822 |          |
| 4.765184 |          | 6.837442 |
| 5.902916 | 6.636597 | 5.095456 |
|          | 5.17092  |          |
|          | 3.770725 |          |
| 7.583822 | 6.737888 | 7.470993 |
| 6.053025 | 6.7721   | 6.485768 |
| 9.615069 | 11.14599 | 9.965365 |
| 11.53616 | 11.79271 | 11.43894 |
| 6.015294 | 4.965639 |          |
| 1.817384 |          |          |
| 11.1565  | 11.37744 | 12.07461 |
| 7.795019 | 7.325369 | 7.973998 |
| 7.41246  | 6.843891 | 7.775281 |
| 4.650809 |          | 7.032602 |
| 8.670259 | 8.761663 | 8.384824 |
| 7.457707 | 8.449923 | 6.976731 |
| 8.45538  | 8.056781 | 8.713947 |
| 8.845152 | 8.213141 | 8.950782 |
| 5.777974 |          |          |
| 5.533369 |          |          |
| 7.574075 | 7.998987 |          |
| 5.856412 |          |          |
|          |          | 2.360536 |
| 5.070166 | 5.190182 |          |
| 7.391783 | 8.080594 | 7.04366  |
| 10.37888 | 11.53257 | 11.37396 |
| 9.118079 | 10.04541 | 7.629695 |
| 5.289883 | 6.019772 |          |
| 6.661544 | 6.075961 | 6.794504 |
|          | 5.955308 | 5.952905 |
| 9.784488 | 9.687202 | 9.728409 |
| 4.52773  |          |          |
| 5.568939 | 4.564595 | 5.240966 |
|          | 6.036202 | 5.741802 |
| 6.832025 | 6.702938 |          |
| 4.866763 |          |          |

|          |          |          |
|----------|----------|----------|
|          | 6.088744 |          |
| 6.357604 |          | 6.210956 |
|          |          | 3.943798 |
| 7.809167 | 7.654589 | 8.024828 |
| 5.579421 |          | 4.393267 |
|          |          | 6.629025 |
| 9.076188 | 8.836353 | 8.699413 |
| 6.769021 | 7.831928 | 6.564452 |
| 7.556304 | 7.284309 | 7.862927 |
| 9.209091 | 9.174681 | 9.755672 |
| 8.22992  | 8.060346 | 8.382188 |
|          | 4.469289 | 6.146645 |
|          | 3.510845 |          |
| 12.74849 | 12.40084 | 12.32816 |
| 8.793877 | 9.289585 | 8.775365 |
| 6.270296 | 5.797752 | 3.250339 |
| 7.548727 | 6.947622 | 7.651861 |
| 6.300022 | 5.638229 | 6.283696 |
|          | 5.186666 |          |
| 9.829614 | 9.626293 | 9.468561 |
| 9.815976 | 10.07398 | 9.412314 |
|          | 6.013426 |          |
| 8.432443 | 9.085601 | 7.546163 |
|          |          | 4.781522 |
| 5.153151 | 6.088954 | 6.517656 |
|          | 5.330185 |          |
| 6.565702 |          | 6.570555 |
| 8.099786 | 7.946815 |          |
| 4.057164 | 5.955992 | 6.220465 |
| 7.424351 | 7.451912 | 6.295537 |
|          |          | 4.045803 |
|          |          | 4.719216 |
| 6.868995 | 7.859093 | 7.204913 |
| 9.363626 | 9.003613 | 9.358097 |
| 8.549761 | 10.05893 | 10.75849 |
|          | 1.849527 |          |
| 5.98399  | 5.716381 |          |
| 2.340901 |          |          |
| 6.044754 | 6.757949 | 6.902938 |

|          |          |          |
|----------|----------|----------|
|          | 6.623449 | 6.60786  |
| 8.850939 |          | 8.847558 |
| 9.095075 | 9.341024 | 9.131938 |
| 5.289177 | 5.919076 | 6.17822  |
| 10.87949 | 11.02346 | 10.94722 |
| 0.894373 |          |          |
|          |          | 6.081807 |
| 12.71071 | 12.54372 | 12.99482 |
| 13.08682 | 12.4843  | 13.77261 |
| 8.080774 | 8.031508 | 8.243904 |
| 7.688614 | 8.402994 | 8.559135 |
|          |          | 5.313921 |
| 7.917115 | 7.99628  | 8.378303 |
| 5.715313 |          |          |
| 8.849327 | 8.476621 | 8.655832 |
| 6.105447 |          | 6.386634 |
| 6.771821 | 7.0478   | 5.927465 |
| 7.770452 | 7.600965 | 7.546593 |
| 8.551775 | 8.343964 | 8.52044  |
| 6.252999 | 6.03718  | 5.853124 |
|          |          | 6.574446 |
| 6.791054 | 3.853107 | 8.462345 |
| 10.39373 | 10.26328 | 10.7777  |
|          |          | 6.253454 |
|          | 0.471559 | 3.642011 |
| 5.363566 | 6.149783 |          |
| 8.098952 | 8.518681 | 7.873026 |
| 9.34568  | 8.908818 | 9.311788 |
|          |          |          |
| 7.595773 | 6.992521 | 6.410758 |
| 8.407998 | 7.431055 | 6.746403 |
| 6.698546 | 7.416197 |          |
| 6.225147 |          | 5.942935 |
| 10.10213 | 9.957127 | 9.654916 |
| 7.681315 | 7.628271 | 8.075079 |
| 6.144633 | 6.214476 | 6.309283 |
| 5.663991 |          | 5.734448 |
|          |          | 6.500573 |
| 4.155045 |          |          |



|          |          |          |
|----------|----------|----------|
| 4.6507   |          |          |
|          | 6.880432 |          |
| 4.126586 |          |          |
| 4.822515 |          |          |
|          |          | 6.142616 |
|          | 5.66612  |          |
| 9.79836  | 10.48892 | 9.362579 |
|          | 4.314496 |          |
| 7.230876 | 6.799673 | 7.439342 |
| 2.854557 |          |          |
| 5.819941 | 7.915853 | 6.930552 |
| 6.774933 | 7.29492  | 6.997517 |
| 7.330908 | 8.568411 | 7.228712 |
| 10.17201 | 9.9997   | 10.17693 |
| 7.918386 | 6.531232 | 8.736721 |
| 9.761601 | 9.349086 | 9.658417 |
|          |          | 5.7188   |
| 6.606689 | 6.698077 | 5.509057 |
| 6.432519 | 6.402231 | 6.435238 |
| 6.921218 | 6.650494 | 6.304377 |
| 3.798479 |          |          |
| 8.806415 | 8.779541 | 8.847666 |
|          | 7.242327 | 6.791852 |
| 6.29161  | 6.170446 | 6.612451 |
|          | 7.482157 |          |
| 6.19462  | 6.391564 | 4.873634 |
|          |          |          |
| 0.052402 |          |          |
| 7.856861 | 7.734016 | 7.538942 |
| 6.056967 | 5.798349 | 6.543037 |
| 9.441597 | 8.986537 | 9.537592 |
| 10.18226 | 9.739921 | 9.347859 |
| 5.254056 | 5.423031 |          |
| 6.101825 | 5.823996 |          |
| 5.037051 | 5.015255 |          |
| 6.415278 | 7.313555 | 6.312519 |
|          | 2.062235 |          |
| 6.95754  | 6.53866  | 6.952804 |
|          |          |          |
| 5.088467 |          |          |

|          |          |          |
|----------|----------|----------|
|          |          | 5.332177 |
| 8.960118 | 7.971135 | 8.629209 |
| 6.394194 | 6.895347 | 6.980148 |
| 10.05868 | 10.73526 | 10.55615 |
| 7.540595 | 8.168622 | 8.344341 |
|          |          | 5.12904  |
| 5.691959 | 6.366023 |          |
| 4.720417 |          | 5.497093 |
| 7.808855 | 8.713097 | 7.335178 |
| 10.87053 | 10.94577 | 10.90726 |
| 5.392915 | 5.595676 | 5.813775 |
| 9.472258 | 9.420651 | 8.737789 |
| 6.557926 | 6.802444 | 6.833627 |
| 6.338668 |          | 6.674287 |
| 5.645177 |          |          |
| 10.1353  | 9.930569 | 10.15329 |
| 10.84121 | 11.12073 | 10.05773 |
| 8.477682 | 8.788834 | 7.416574 |
|          |          |          |
| 6.100518 | 3.345281 |          |
| 12.31963 | 12.41672 | 12.72094 |
| 8.301575 | 8.199899 | 8.833468 |
| 8.426559 | 8.301727 | 8.586196 |
| 9.512994 | 9.547314 | 9.078228 |
| 6.385318 | 6.436843 | 6.532136 |
| 6.217536 | 6.621835 | 6.040168 |
| 6.487931 | 5.861781 | 7.193852 |
|          | 5.79772  |          |
| 5.485716 |          | 6.324844 |
| 4.91332  | 6.008976 |          |
| 8.098129 | 8.632433 | 8.062897 |
| 9.411137 | 10.66418 | 9.292333 |
| 12.30128 | 12.42147 | 12.54816 |
| 7.571044 | 8.308508 | 6.879722 |
| 8.860756 | 8.701603 | 8.434689 |
|          | 5.487096 | 5.551854 |
| 4.264999 | 5.807545 |          |
| 6.060603 | 8.2841   | 6.75116  |
| 7.461954 | 8.452227 | 7.252914 |
|          | 5.89126  |          |

|          |          |          |
|----------|----------|----------|
| 7.961288 | 7.746368 | 7.250784 |
| 13.47666 | 13.04195 | 12.89952 |
| 9.796673 | 9.346733 | 9.167855 |
| 9.510373 | 8.459838 | 8.705671 |
| 12.26344 | 11.9101  | 12.1463  |
| 8.857533 | 9.026535 | 9.023563 |
|          |          | 6.049731 |
| 9.749401 | 9.882632 | 10.51524 |
| 11.15859 | 11.06687 | 10.96691 |
| 8.814931 | 8.419626 | 8.507254 |
|          |          | 3.045273 |
| 5.69643  | 5.125873 | 6.218712 |
| 8.791089 | 8.468032 | 8.941339 |
| 14.27373 | 13.93485 | 14.37602 |
| 7.925607 | 8.692514 |          |
| 5.749528 | 4.451075 |          |
| 9.790825 | 9.340382 | 8.680278 |
| 7.470844 | 8.198814 | 7.299004 |
| 5.823145 |          |          |
| 10.73181 | 10.79494 | 10.67307 |
| 6.00996  | 5.940602 | 6.209059 |
|          | 2.471269 |          |
|          | 6.256576 |          |
| 11.48746 | 11.32746 | 11.85855 |
| 9.160912 | 9.782204 | 9.68923  |
| 8.700716 | 8.751444 | 8.655432 |
| 9.577838 | 9.509075 | 9.540192 |
| 7.043397 | 8.447452 | 7.056553 |
| 8.62349  | 8.035914 | 9.342033 |
| 9.571564 | 9.853156 | 9.749924 |
| 8.894845 | 8.071811 | 7.778872 |
| 5.818681 | 6.144645 | 6.248169 |
| 9.128269 | 9.192553 | 10.32521 |
| 6.250548 | 5.970943 |          |
| 7.479131 | 8.348708 | 8.432796 |
|          | 7.026006 |          |
| 8.704498 | 8.455155 | 7.594104 |
|          | 6.370465 |          |
| 5.603437 | 6.695435 | 6.907533 |

|          |          |          |
|----------|----------|----------|
| 8.422793 | 8.104615 | 7.768144 |
| 5.033482 | 5.478406 | 5.801026 |
| 9.688024 | 10.1806  | 9.487379 |
| 12.72728 | 12.21311 | 12.51548 |
|          | 6.155724 |          |
| 5.074079 | 6.755305 | 6.248531 |
| 5.963287 | 5.701445 | 6.955152 |
| 6.872645 |          |          |
| 7.100225 | 7.296887 | 6.895015 |
| 11.41711 | 11.40159 | 11.6676  |
| 9.49814  | 8.855465 | 9.059684 |
| 8.055355 | 8.472086 | 8.284712 |
| 7.480343 | 7.512531 | 7.744106 |
| 9.282909 | 9.34295  | 9.368279 |
| 11.40766 | 11.24878 | 11.38365 |
| 5.225091 | 5.309574 | 5.633182 |
| 6.719566 | 6.865217 | 6.454016 |
| 8.021996 | 8.033332 | 8.286606 |
| 8.054297 | 8.654582 | 7.961741 |
| 7.848835 | 7.59757  | 7.571373 |
| 6.613853 | 7.458369 | 7.143663 |
| 7.77711  | 8.21515  | 7.99352  |
|          | 6.392529 | 6.528443 |
| 6.116805 | 5.881677 | 6.949303 |
| 6.394074 | 7.446271 | 7.425097 |
| 7.666982 | 7.704811 | 7.235532 |
| 6.905266 | 7.741013 | 6.687943 |
| 8.197622 | 8.957525 | 8.506994 |
| 10.5446  | 10.95735 | 10.41411 |
| 10.20749 | 8.667637 | 9.648104 |
| 7.789017 | 7.471672 | 6.645972 |
| 8.276331 | 7.752272 | 8.821299 |
| 7.272975 | 7.49258  | 7.977993 |
| 9.166921 | 8.805761 | 8.980461 |
| 8.270249 | 8.555436 | 7.924213 |
| 11.52791 | 10.82389 | 11.02549 |
|          |          | 6.263155 |
| 11.65029 | 11.37447 | 11.64397 |
| 7.676712 | 7.992843 | 7.331144 |
| 5.693086 |          | 5.25347  |

|          |          |          |
|----------|----------|----------|
| 6.591056 | 6.011716 | 5.797904 |
| 5.850521 | 4.853899 | 5.734304 |
| 10.93191 | 10.81748 | 11.15122 |
| 13.73694 | 13.37949 | 13.76284 |
| 2.557901 | 5.461622 |          |
| 12.55422 | 12.48565 | 12.245   |
| 7.13626  |          |          |
| 4.529409 | 6.517736 |          |
| 9.997908 | 9.183513 | 9.691216 |
| 5.734291 | 6.942617 |          |
| 6.441817 | 6.034544 | 6.818219 |
| 8.122299 | 8.334572 | 6.496974 |
|          |          | 6.492139 |
| 6.712372 | 6.98169  | 6.031081 |
| 6.73834  | 7.538643 | 6.870695 |
| 6.426803 | 6.153614 | 6.455885 |
| 5.217134 | 4.946599 |          |
| 6.941347 | 6.771342 | 7.640199 |
| 5.200388 | 6.373362 |          |
| 7.473898 | 7.753892 | 6.864447 |
| 4.434841 |          | 4.188947 |
| 8.050685 | 7.534457 | 8.523457 |
| 8.877893 | 9.016075 | 9.095459 |
| 5.167089 | 6.448419 | 6.133218 |
| 8.596132 | 7.81964  | 8.256283 |
| 5.727498 | 5.534232 | 6.326183 |
| 3.427005 |          |          |
| 12.66164 | 12.37278 | 12.68    |
| 8.145491 | 7.87847  | 7.376725 |
| 4.031677 |          |          |
| 9.194309 | 8.837422 | 8.81773  |
| 7.569347 |          |          |
| 13.22721 | 13.06228 | 13.40502 |
| 7.314445 | 7.764776 |          |
| 11.3033  | 11.02506 | 11.41046 |
| 7.770764 | 7.321028 | 7.323089 |
|          |          | 2.99248  |
| 6.341178 | 5.98558  |          |
| 9.572038 | 9.190956 | 8.753136 |
| 7.458215 | 6.630167 | 7.076462 |

|          |          |          |
|----------|----------|----------|
| 7.324481 | 7.675421 | 7.5557   |
|          | 5.576403 |          |
| 7.274504 | 7.058233 | 7.134645 |
|          | 6.04538  | 6.133447 |
| 9.26894  | 8.486979 | 8.374619 |
| 9.070185 | 7.909406 | 8.681013 |
| 6.721204 | 6.699564 | 6.57223  |
| 8.70652  | 8.777391 | 8.237269 |
| 5.870101 | 5.260321 | 5.006102 |
| 8.829646 | 8.155531 | 9.531602 |
|          | 5.344774 | 5.217246 |
| 6.816133 | 7.064658 | 7.613308 |
| 9.248687 | 9.392248 | 9.974134 |
| 7.482287 | 6.822334 | 7.513242 |
| 10.34316 | 10.50091 | 10.47565 |
| 10.03789 | 9.544706 | 9.579886 |
|          | 8.380057 |          |
| 5.883414 |          | 6.017174 |
| 9.730917 | 9.583499 | 9.171041 |
| 5.091534 |          |          |
| 10.21759 | 8.670277 | 10.36294 |
| 6.383745 | 6.681893 | 6.619017 |
| 8.007938 | 7.215157 | 8.031178 |
| 4.789602 | 6.127689 | 5.742784 |
| 5.310174 | 5.391    | 5.188042 |
|          | 3.943906 | 4.694422 |
| 8.194158 | 7.756731 | 7.733507 |
| 10.14473 | 9.99752  | 10.34624 |
| 5.911947 | 5.340002 |          |
| 3.455499 | 5.275383 | 6.274418 |
| 6.227901 | 5.899248 | 2.4923   |
|          | 1.653178 |          |
| 4.501872 | 5.523661 |          |
| 6.195143 | 6.836041 |          |
|          |          | 5.950942 |
| 11.49411 | 11.50213 | 11.4507  |
| 11.04732 | 10.62658 | 10.51677 |
|          |          | 2.257099 |
| 6.317518 |          | 5.935762 |
| 7.038055 | 8.670553 |          |

|          |          |          |
|----------|----------|----------|
|          | 6.680913 | 5.943105 |
| 5.955603 | 7.801495 | 6.692051 |
| 6.42789  | 8.631277 | 8.318338 |
| 10.78778 | 10.33189 | 10.6647  |
| 6.440499 | 6.32429  | 6.629749 |
|          | 2.586413 |          |
| 9.335355 | 9.282953 | 8.929057 |
| 7.686062 | 8.35358  | 6.393047 |
| 5.711539 | 6.677211 |          |
| 7.37929  | 7.964728 | 8.167695 |
| 13.42643 | 13.32615 | 13.69202 |
|          |          | 3.469008 |
| 12.59806 | 12.55516 | 13.16344 |
| 12.6007  | 12.26816 | 12.70338 |
|          |          | 5.884279 |
| 5.565915 | 7.331844 |          |
| 5.82915  | 7.045573 | 6.251111 |
| 5.827043 | 4.859752 | 6.302831 |
| 9.117905 | 9.078611 | 9.624773 |
| 5.115893 |          | 4.844238 |
| 6.953445 | 7.326947 | 6.723186 |
| 8.839538 | 9.643777 | 8.668366 |
| 9.04888  | 9.020655 | 9.219538 |
|          | 7.860718 | 7.043571 |
| 5.549204 |          | 6.223971 |
| 5.756851 | 5.616262 | 5.617845 |
| 6.877862 | 6.505994 |          |
| 7.850182 | 7.594188 | 8.220513 |
| 7.536948 |          | 7.291622 |
| 7.94334  | 8.233629 | 8.346885 |
| 3.674323 |          |          |
| 5.076937 |          |          |
| 7.886303 | 7.130135 | 8.023671 |
| 4.950796 | 6.03717  | 5.776392 |
| 6.337991 | 7.253423 | 6.331646 |
| 4.22492  | 5.397878 | 5.783379 |
| 5.865696 | 7.220062 | 6.653753 |

|          |          |          |
|----------|----------|----------|
| 6.415112 | 6.632819 | 6.410125 |
|          | 6.478272 | 5.384427 |
| 4.779962 | 5.014547 | 5.139327 |
| 5.312776 | 5.835975 |          |
| 12.73918 | 12.98387 | 12.57275 |
|          | 5.710367 | 5.918285 |
| 5.240343 | 6.254952 | 5.976007 |
| 10.07039 | 9.822706 | 9.628343 |
| 6.226331 | 7.316134 |          |
| 7.370403 | 6.59264  | 8.030039 |
| 7.123007 | 7.363417 | 7.779995 |
| 5.727517 | 6.03572  | 6.329445 |
| 4.729746 | 6.091765 | 6.469957 |
| 12.9306  | 12.91412 | 13.05878 |
| 9.704495 | 9.645157 | 9.474423 |
| 9.567003 | 9.012446 | 9.180548 |
|          | 5.948627 | 6.199878 |
| 5.27106  | 6.401266 |          |
| 8.28097  | 8.211863 | 8.246569 |
|          | 5.647486 |          |
| 6.67856  | 7.726385 | 7.408721 |
| 7.879817 | 7.899838 | 8.173144 |
| 5.863986 |          |          |
| 7.41726  | 7.009826 | 6.052033 |
| 6.778004 | 6.628431 | 6.43392  |
| 3.950203 | 5.636314 | 6.596674 |
| 5.723064 | 6.096966 | 6.221896 |
|          | 6.328117 |          |
| 0.368241 |          |          |
| 6.685071 | 7.021484 | 6.225733 |
|          | 5.585857 |          |
| 8.992629 | 8.601971 | 8.880697 |
| 5.0035   |          | 5.089056 |
|          |          | 6.456342 |
| 8.914488 | 9.484784 | 8.583334 |
| 8.314119 | 8.075669 | 7.446112 |
| 8.714055 | 8.644408 | 8.471543 |
| 7.840172 | 8.521126 | 7.847601 |
| 6.958203 | 6.480926 | 6.821917 |



|          |          |          |
|----------|----------|----------|
| 7.009329 | 6.853132 | 7.518632 |
| 6.918308 | 7.204528 | 7.339997 |
| 10.82623 | 10.72317 | 11.26813 |
| 7.403794 | 7.44955  | 7.229206 |
| 7.010408 | 7.401189 | 7.282106 |
| 5.505586 | 5.55869  | 5.341214 |
|          | 4.438044 |          |
| 10.71254 | 10.87681 | 10.60968 |
| 6.242348 | 6.804274 | 6.01154  |
| 7.825377 | 9.439448 | 6.478418 |
| 11.64159 | 11.51894 | 10.50009 |
| 11.91859 | 11.82749 | 11.70669 |
|          | 7.847266 | 8.442409 |
| 6.939359 | 6.651023 | 6.55175  |
| 8.586582 | 8.037993 | 8.754729 |
| 10.3194  | 10.64796 | 10.48347 |
| 5.789928 | 5.603766 | 6.037704 |
|          | 4.342407 |          |
| 9.444386 | 9.406668 | 9.462058 |
| 5.939946 | 5.532291 |          |
| 6.605344 | 5.982583 | 6.719651 |
| 7.142619 | 7.180213 | 6.152862 |
| 11.5089  | 11.46752 | 11.40007 |
| 9.256531 | 10.09432 | 8.343918 |
| 8.294797 | 8.178207 | 8.324355 |
| 11.50143 | 11.60198 | 12.09008 |
| 5.624862 | 4.398367 | 4.128933 |
| 6.289813 | 6.531733 |          |
| 6.300438 | 6.085644 | 6.926642 |
| 7.102115 | 6.651815 | 7.435858 |
| 9.438566 | 9.434228 | 8.963876 |
| 7.54919  | 8.020089 | 7.82336  |
| 12.52855 | 12.39916 | 12.49242 |
| 8.544058 | 8.702273 | 9.111234 |
| 10.90097 | 11.25039 | 9.805726 |
| 7.268508 | 6.987626 | 5.75752  |
| 8.09269  | 8.478166 | 7.676587 |
| 7.987702 | 7.589759 |          |
| 11.88994 | 11.78072 | 12.235   |
| 11.38111 | 10.98686 | 11.83164 |

|          |          |          |
|----------|----------|----------|
| 9.202448 | 8.238271 | 9.02659  |
| 9.054529 | 9.295225 | 9.276628 |
| 9.623412 | 9.673739 | 9.908205 |
| 9.668363 | 8.957924 | 9.640927 |
|          |          | 5.038791 |
| 6.461081 | 6.543325 | 6.804291 |
| 8.910212 | 9.133547 | 9.26819  |
| 6.053916 | 6.462952 | 6.006084 |
| 6.546525 | 8.326645 |          |
| 8.160673 | 8.410794 | 8.385876 |
| 7.852495 | 6.612655 | 7.44716  |
|          |          |          |
| 6.8843   | 6.543662 |          |
| 10.75908 | 11.10246 | 10.89098 |
| 8.511354 | 11.95558 | 3.012531 |
| 8.585249 | 8.555913 | 8.858133 |
| 6.384775 | 6.170353 | 6.815905 |
| 9.030271 | 7.967929 | 10.15229 |
| 5.413593 | 6.130514 | 6.850352 |
| 10.90805 | 11.01539 | 10.3029  |
| 12.04791 | 11.76935 | 12.17766 |
| 10.99589 | 10.65192 | 11.12666 |
| 8.519588 | 9.540348 | 8.971877 |
| 9.545887 | 8.982761 | 9.623698 |
| 6.828188 | 6.787369 | 7.451533 |
| 5.188419 | 5.834312 | 5.451678 |
| 7.362376 | 7.084459 | 7.293499 |
|          | 7.777497 | 8.530122 |
| 7.157524 | 7.18672  | 6.720976 |
| 8.352455 | 8.211719 | 7.488604 |
| 5.822322 |          |          |
|          | 5.315292 |          |
|          |          | 2.145702 |
| 6.104561 |          |          |
| 0.033068 |          |          |
|          | 6.493628 | 3.404548 |
| 13.02502 | 12.39129 | 12.66931 |
| 9.913194 | 9.683921 | 9.848213 |
| 5.749051 | 5.550369 | 5.377502 |
| 6.072186 | 6.639508 | 7.194944 |

|          |          |          |
|----------|----------|----------|
|          |          | 5.290627 |
| 10.52306 | 10.3639  | 9.846062 |
| 13.07321 | 13.56885 | 12.70487 |
| 6.204869 |          |          |
| 8.987566 | 8.864025 | 9.446448 |
| 11.13467 | 11.21803 | 11.25438 |
| 8.478281 | 7.480663 | 8.865473 |
| 10.60712 | 10.80513 | 10.43704 |
| 6.154867 | 6.517079 | 7.508927 |
| 8.942108 | 9.294294 | 8.92818  |
| 6.115881 |          | 4.645499 |
| 8.339458 | 8.825014 | 8.69889  |
| 13.44174 | 13.65556 | 13.65741 |
| 10.28012 | 10.43038 | 10.58077 |
|          |          |          |
|          |          | 6.367289 |
| 7.773438 | 7.721634 | 7.400611 |
| 7.346615 | 7.391964 | 6.02656  |
|          |          | 4.922589 |
|          | 5.545569 |          |
| 6.242108 | 7.103117 | 6.464597 |
| 8.888658 | 9.598516 | 8.865458 |
| 9.443818 | 9.757148 | 9.883891 |
| 10.01793 | 9.680021 | 9.636095 |
| 5.961358 | 7.08385  | 7.27953  |
| 9.046113 | 9.648828 | 9.743729 |
| 7.030187 | 7.546369 | 7.735599 |
| 11.0558  | 11.36861 | 10.76743 |
| 4.368463 | 6.079939 |          |
| 9.534932 | 9.438056 | 9.550912 |
| 6.653359 | 7.251827 | 7.605852 |
| 11.33521 | 11.18601 | 11.87494 |
| 11.23694 | 10.74047 | 11.54397 |
|          |          | 2.341721 |
| 8.968894 | 9.068254 | 8.815666 |
| 5.206944 | 5.940085 |          |
| 8.938046 | 8.486138 | 7.844255 |
| 9.247348 | 9.883534 | 10.08655 |
| 6.753944 | 6.765427 | 6.856332 |
| 8.755543 | 8.412285 | 6.684629 |

|          |          |          |
|----------|----------|----------|
| 13.11171 | 13.63622 | 12.48179 |
| 10.0491  | 10.24212 | 9.63878  |
| 6.136059 |          | 5.964471 |
| 6.937669 | 8.142995 | 7.297596 |
| 6.454001 | 5.91124  |          |
| 6.110474 |          | 6.588306 |
| 12.56595 | 12.38196 | 12.73461 |
| 6.525608 | 5.794867 | 5.963428 |
| 9.322367 | 9.15315  | 8.971447 |
| 11.16526 | 11.0293  | 10.82462 |
| 10.9935  | 12.1063  | 12.02537 |
| 3.902505 | 6.333208 | 4.865775 |
|          |          | 6.37135  |
|          | 5.562786 | 4.584114 |
| 11.31288 | 11.24113 | 11.2929  |
| 6.338452 | 6.933429 | 7.289503 |
| 5.89034  |          |          |
|          | 4.524849 |          |
| 8.628964 | 7.340684 | 8.348187 |
| 14.61531 | 14.56374 | 14.5368  |
| 14.5392  | 14.68061 | 14.67038 |
| 10.82224 | 10.54558 | 10.76194 |
|          | 5.561314 |          |
| 8.01753  | 7.924572 | 8.247588 |
| 9.165662 | 9.913801 | 8.586267 |
| 6.19243  | 6.429891 | 7.113473 |
| 13.08736 | 13.39769 | 12.82606 |
| 6.720453 | 6.7438   |          |
|          | 6.400964 | 3.428056 |
| 7.445366 | 7.790571 | 8.021667 |
| 7.280232 | 7.351076 | 6.514882 |
|          |          | 4.944104 |
| 5.977739 | 5.424049 | 6.305471 |
| 8.929317 | 9.69733  | 8.075397 |
| 7.313194 | 7.791281 | 7.759921 |
| 5.973813 |          | 6.397495 |
| 8.245479 | 8.705108 | 8.405608 |
| 11.1987  | 10.99353 | 10.6625  |
| 6.123518 | 6.405927 | 6.554289 |
|          | 7.015459 | 7.38301  |

|          |          |          |
|----------|----------|----------|
| 10.58856 | 11.75547 | 10.4738  |
| 8.924778 | 10.44339 | 8.938125 |
| 6.924888 | 6.489469 | 6.329272 |
| 9.114825 | 8.170817 | 8.420903 |
|          | 4.909659 | 5.208211 |
| 7.123604 | 8.484388 | 7.187594 |
| 5.839989 | 6.980217 |          |
| 5.293911 | 5.544002 |          |
| 10.51292 | 9.171142 | 10.43665 |
| 13.71962 | 13.06887 | 13.79763 |
| 10.35934 | 10.35725 | 10.24436 |
| 6.936842 | 6.445966 | 7.021102 |
| 9.404838 | 9.507403 | 10.09624 |
| 5.976734 | 7.440325 | 6.604252 |
| 9.54039  | 9.183555 | 9.597493 |
| 11.39634 | 11.49277 | 11.34987 |
| 9.191479 | 9.861435 | 8.835176 |
| 6.891266 | 7.919097 |          |
| 9.562864 | 9.87642  | 7.878642 |
| 7.016133 | 6.967528 | 8.105062 |
|          |          | 5.844627 |
| 6.833369 | 7.909089 | 7.990114 |
|          | 4.945395 |          |
| 7.171575 | 6.940929 | 7.332493 |
| 6.697035 | 6.879564 | 7.379998 |
| 9.176186 | 8.580388 | 9.118261 |
| 6.704105 | 6.476822 | 6.404785 |
| 6.604741 | 7.474535 | 6.936374 |
| 5.391241 |          |          |
| 8.936445 | 8.508411 | 8.335938 |
| 5.531436 | 6.336748 | 6.430669 |
| 7.026427 | 7.632348 | 8.043195 |
| 8.942559 | 9.285061 | 7.660045 |
| 5.450692 | 5.489457 | 6.012551 |
| 5.172215 |          |          |
| 6.371517 | 6.784839 | 7.621473 |
| 10.67574 | 9.942009 | 10.90154 |
| 1.440075 | 6.056423 |          |
| 6.138013 | 6.223353 | 6.452997 |
| 4.69169  | 6.198239 | 6.081561 |

|          |          |          |
|----------|----------|----------|
| 7.081489 | 7.326414 | 7.668376 |
| 11.95327 | 12.06637 | 11.8677  |
| 14.15016 | 13.84099 | 13.9863  |
| 7.442365 | 7.616754 | 7.442893 |
| 6.452306 |          |          |
| 7.428058 | 8.118695 | 8.492549 |
| 8.359067 | 8.355757 | 7.635927 |
| 5.257957 | 6.661916 | 7.61931  |
| 6.690493 | 7.041949 |          |
|          | 4.238507 | 6.992854 |
| 5.813076 | 5.343608 |          |
|          | 5.061634 |          |
| 10.88926 | 11.53695 | 10.80996 |
| 6.312409 | 7.3216   | 7.036007 |
| 7.115133 | 6.89741  | 7.440309 |
|          | 3.996888 | 5.977399 |
| 11.36391 | 11.18519 | 11.34606 |
| 7.122083 | 7.230103 |          |
| 4.037528 | 5.376928 | 6.221318 |
| 6.900092 | 6.178421 |          |
| 7.620006 | 7.269633 | 8.006644 |
| 9.066483 | 9.672748 | 8.571227 |
| 10.2546  | 8.773074 | 8.607095 |
|          |          | 5.494385 |
| 6.783102 | 5.994449 | 6.952169 |
| 5.012254 | 6.687863 | 6.291593 |
| 6.231797 | 6.12351  |          |
| 9.860241 | 10.02709 | 10.148   |
| 6.160252 | 7.300447 | 7.271973 |
| 10.90512 | 10.34393 | 10.88936 |
| 9.445366 | 11.02356 | 9.181056 |
| 6.294788 | 6.889389 | 7.054558 |
|          | 2.136571 | 6.338827 |
|          | 6.495895 |          |
| 4.351779 | 4.986827 | 6.192371 |
| 7.812252 | 8.781197 | 7.96392  |
| 8.569989 | 8.001384 | 8.683873 |
| 9.636321 | 10.29162 | 10.01287 |
| 12.21709 | 12.17733 | 12.13621 |

|          |          |          |
|----------|----------|----------|
| 6.283801 | 7.812223 | 6.992818 |
| 9.003477 | 9.05542  | 8.416237 |
| 7.444763 | 6.852448 | 7.160384 |
| 8.463998 | 8.001903 | 8.595824 |
| 8.706061 | 9.087534 | 8.775783 |
| 9.586848 | 9.958665 | 9.736247 |
| 6.998971 | 7.153597 |          |
| 7.945122 | 8.121141 | 8.025504 |
| 10.46772 | 10.49602 | 10.27546 |
| 11.76989 | 11.51463 | 11.43298 |
| 8.72539  | 8.720444 | 8.585289 |
| 7.335496 | 6.323861 | 7.071124 |
| 8.478748 | 8.035068 | 8.804272 |
| 7.969401 | 8.201293 | 8.122409 |
| 14.64417 | 15.03337 | 14.11374 |
|          |          | 5.543802 |
| 8.569742 | 8.311062 | 8.846558 |
| 8.97315  | 9.383582 | 8.988531 |
| 6.291449 | 4.192658 | 6.396849 |
| 11.23826 | 11.0144  | 11.43316 |
| 12.51061 | 12.91612 | 12.40035 |
| 13.16775 | 13.04736 | 13.32283 |
| 9.812587 | 9.58335  | 9.950067 |
| 9.95954  | 9.670609 | 9.832526 |
| 9.403037 | 10.06167 | 9.587199 |
| 10.67085 | 10.13589 | 10.47785 |
| 6.429333 | 5.704966 | 7.660948 |
| 11.5475  | 11.5092  | 11.39479 |
| 8.542468 | 8.96576  | 8.881386 |
| 7.331318 | 7.015897 | 6.955117 |
| 4.262904 | 5.810616 |          |
| 7.074171 | 6.408951 |          |
| 4.083099 |          | 5.441749 |
| 11.82088 | 11.0627  | 10.28147 |
| 12.85834 | 12.04581 | 11.76794 |
| 11.1405  | 10.48374 | 11.11423 |
| 14.1266  | 12.93673 | 13.31353 |
| 13.56049 | 12.56183 | 12.28401 |
| 5.703489 | 6.250247 |          |
| 8.21197  | 8.498654 | 8.028935 |

|          |          |          |
|----------|----------|----------|
| 9.795246 | 9.719363 | 10.37775 |
| 6.81245  | 7.206165 | 5.875388 |
| 9.068641 | 9.384259 | 9.052418 |
| 6.655282 | 7.106731 | 6.805488 |
| 6.865967 | 6.139385 | 7.177111 |
| 4.37161  | 5.877991 | 6.442941 |
| 9.280819 | 9.607036 | 9.426022 |
| 12.10588 | 12.05137 | 11.65876 |
| 8.160131 | 7.359526 | 8.090163 |
| 9.812534 | 10.31171 | 8.983687 |
| 7.569326 | 5.455793 | 9.783656 |
| 8.90798  | 9.253042 | 8.469387 |
| 7.007296 | 6.861593 | 6.837585 |
|          |          | 5.387916 |
| 8.288108 | 6.646385 | 7.131951 |
| 10.56231 | 10.49906 | 10.38405 |
| 7.095862 | 6.858018 | 7.992741 |
| 6.471993 | 6.817657 | 7.164576 |
|          | 5.509457 |          |
| 12.09336 | 11.97675 | 12.44373 |
| 7.921864 | 7.640285 | 8.442678 |
| 11.26332 | 11.55668 | 10.43225 |
|          |          | 3.070619 |
| 11.74407 | 11.81992 | 11.50416 |
| 8.150311 | 8.744547 | 8.131587 |
| 8.998028 | 8.865823 | 9.059901 |
| 10.2032  | 9.976287 | 10.65153 |
| 6.168372 | 6.674591 | 6.220392 |
| 9.460944 | 9.917572 | 9.281649 |
| 5.314485 | 5.533703 | 5.0969   |
| 12.38801 | 12.53715 | 12.82767 |
|          |          | 6.916023 |
|          |          | 6.345068 |
| 11.16918 | 10.85033 | 11.31027 |
| 8.14737  | 8.329778 | 7.613844 |
| 7.307072 | 6.296651 | 7.150885 |
| 10.28245 | 10.31087 | 9.784045 |
| 5.686271 | 4.917494 | 5.971413 |



|          |          |          |
|----------|----------|----------|
| 5.840285 | 2.693555 | 5.042996 |
| 9.350372 | 6.354472 | 5.310059 |
| 12.35953 | 12.0114  | 12.5282  |
| 8.669043 | 7.522089 | 8.016133 |
| 9.170083 | 9.615261 | 8.450075 |
| 10.7967  | 10.26379 | 10.86447 |
| 3.588773 | 5.88156  | 6.154537 |
| 10.28749 | 10.41899 | 9.978188 |
| 5.035145 | 6.714078 |          |
| 8.771637 | 9.771472 | 7.637307 |
| 8.15692  | 9.692222 | 9.410347 |
| 9.434525 | 9.122887 | 9.218059 |
| 10.00524 | 10.6594  | 8.940278 |
| 7.405646 | 7.639249 | 8.190359 |
| 6.527481 | 6.29692  | 7.108932 |
| 7.016956 | 8.269297 | 7.466925 |
| 4.93801  |          |          |
| 5.139293 |          |          |
| 13.01413 | 12.96672 | 12.80573 |
| 4.143629 |          |          |
| 13.12412 | 13.32027 | 13.20119 |
| 5.895768 | 6.754207 |          |
| 9.27556  | 9.68188  | 7.898302 |
| 7.541834 | 7.787441 | 8.0991   |
| 11.08295 | 11.31865 | 10.83172 |
| 13.7951  | 13.64236 | 13.81336 |
| 6.77283  | 7.494332 | 7.637928 |
|          | 6.37912  |          |
| 11.36844 | 11.73825 | 11.85452 |
| 6.938715 |          |          |
|          | 3.39652  | 5.830048 |
| 9.040509 | 9.112733 | 9.694332 |
| 4.620907 | 4.562081 | 6.313544 |
| 13.98752 | 13.93029 | 13.75193 |
| 6.155524 |          | 4.813595 |
| 8.97646  | 9.332588 | 8.896012 |
| 11.24456 | 11.3622  | 11.52864 |
| 7.958012 | 8.291533 | 7.585174 |
|          |          | 4.444484 |

|          |          |          |
|----------|----------|----------|
| 9.778856 | 9.86896  | 10.06435 |
| 6.847269 | 7.755325 | 7.772171 |
| 8.759172 | 8.840507 | 7.979791 |
| 5.082046 | 5.905411 |          |
| 8.933998 | 8.219895 | 9.18775  |
| 8.829727 | 8.637358 | 9.023664 |
| 7.122767 | 6.149619 | 6.964898 |
| 8.243412 | 7.891795 | 7.820939 |
| 9.454911 | 8.592141 | 8.740562 |
| 5.702388 | 5.34616  | 5.532445 |
| 5.665009 |          | 6.229022 |
|          | 5.596521 |          |
| 8.902299 | 9.587151 | 9.758229 |
| 8.710498 | 8.962658 | 9.315593 |
| 5.756141 | 6.207236 | 6.412192 |
| 3.644674 | 4.684183 |          |
| 6.384989 | 6.424814 | 3.305485 |
| 7.082523 | 7.126006 | 6.503777 |
| 8.579783 | 8.422311 | 7.733569 |
| 7.491401 | 8.230495 | 7.533851 |
| 11.83652 | 12.27908 | 11.5014  |
| 7.406405 | 7.716521 | 5.985736 |
| 4.59196  | 4.99927  | 4.680792 |
| 5.499149 | 4.607818 | 6.498498 |
| 8.511722 | 7.903435 | 6.40159  |
| 11.10989 | 10.2698  | 11.03184 |
| 11.57764 | 10.87818 | 10.56379 |
| 11.35513 | 10.69437 | 10.8056  |
| 11.34003 | 11.32546 | 11.41596 |
| 10.48784 | 10.12655 | 10.70162 |
| 9.056608 | 8.116885 | 8.020412 |
| 9.057409 | 9.862241 | 8.946266 |
| 5.263975 | 5.583918 | 6.17812  |
| 7.455671 | 7.985036 | 8.232913 |
| 3.951599 |          |          |
| 11.30624 | 11.0263  | 11.2947  |
| 5.954742 | 6.303427 |          |
| 7.621962 | 7.522637 | 7.030725 |

|          |          |          |
|----------|----------|----------|
| 9.690805 | 9.706246 | 9.044684 |
|          | 1.692171 | 5.071703 |
| 12.1589  | 12.01766 | 12.28398 |
|          | 6.539835 | 6.519188 |
| 9.32582  | 9.61022  | 9.299965 |
| 10.89747 | 11.20637 | 11.40019 |
| 10.32077 | 10.06022 | 10.17599 |
| 9.859873 | 9.03509  | 10.02971 |
| 8.057319 | 7.841842 | 7.930128 |
| 7.858624 | 7.462823 | 5.737369 |
| 6.689921 | 8.281384 | 7.790784 |
| 9.897895 | 9.926874 | 9.623738 |
| 14.68861 | 14.78687 | 15.00121 |
| 8.855714 | 9.710071 | 8.880078 |
| 8.67996  | 9.495387 | 9.083403 |
| 4.162827 |          |          |
| 5.65384  | 5.54464  | 7.577938 |
| 5.756096 | 6.330128 | 5.899022 |
| 12.49624 | 12.38614 | 12.54394 |
| 4.073617 | 3.620626 |          |
| 4.715725 |          | 6.346414 |
| 4.894379 |          |          |
| 5.6932   | 4.92995  | 5.968508 |
| 4.404823 | 5.830138 |          |
|          | 6.399214 | 6.683943 |
| 8.836263 | 9.237907 | 9.656857 |
| 6.312598 | 6.056616 |          |
| 7.373808 | 7.629648 | 7.816632 |
| 6.316505 | 7.031101 |          |
| 11.86084 | 12.39208 | 12.43416 |
| 6.735294 | 5.955725 | 6.032102 |
| 8.651867 | 8.611346 | 9.639197 |
| 11.56014 | 11.5211  | 12.34411 |
| 10.20723 | 10.48221 | 10.12102 |
| 6.819016 | 7.482939 | 6.763576 |
| 6.348145 | 8.299084 | 7.785913 |
| 6.496248 | 5.410716 | 6.363612 |

|          |          |          |
|----------|----------|----------|
| 9.86802  | 9.770133 | 9.998858 |
| 8.587247 | 8.921874 | 9.368535 |
| 8.757301 | 8.77296  | 8.639407 |
| 6.179305 | 6.52761  | 7.480499 |
| 10.36381 | 10.32934 | 10.14452 |
| 12.17101 | 12.10522 | 12.35439 |
| 7.932628 | 8.522203 | 6.579772 |
| 7.822171 | 8.3563   | 7.001851 |
| 9.222136 | 10.08095 | 9.097113 |
|          | 6.747338 | 5.576467 |
| 9.818876 | 10.50929 | 9.573874 |
| 9.603051 | 10.24387 | 9.113208 |
| 9.761835 | 10.34223 | 9.567307 |
| 14.12923 | 13.73449 | 14.05977 |
| 7.475743 | 9.767705 | 7.119856 |
| 7.688476 |          |          |
| 10.34587 | 9.687105 | 10.08206 |
| 9.681672 | 10.20931 | 9.729164 |
| 8.128742 | 9.012422 | 8.330972 |
| 8.188402 | 8.486706 | 8.528189 |
| 6.227654 | 7.653421 | 7.169233 |
| 7.403484 | 8.018525 | 7.994148 |
| 4.952064 | 5.573129 | 5.377726 |
| 8.910914 | 9.197921 | 9.318165 |
| 12.12624 | 11.46378 | 12.22656 |
| 6.378689 | 5.622794 | 4.288981 |
| 4.218836 |          | 6.086523 |
| 13.21587 | 12.84578 | 12.81212 |
| 5.507452 | 4.770597 | 6.901832 |
| 7.16323  | 7.48826  | 6.180929 |
| 8.000248 | 7.92206  | 9.133688 |
| 9.365669 | 10.01242 | 9.041243 |
| 10.07871 | 10.40505 | 10.03527 |
| 9.889022 | 9.736712 | 9.938589 |
| 7.762877 | 6.384088 | 7.285847 |
| 6.685138 | 6.704772 |          |
| 10.11491 | 9.914466 | 9.934572 |
|          | 6.85852  | 5.563325 |
| 12.57094 | 12.52621 | 12.44065 |
| 7.639707 | 7.960012 | 7.757567 |

|          |          |          |
|----------|----------|----------|
| 7.551075 | 7.667084 | 7.958531 |
| 7.090797 | 8.285824 | 7.053967 |
| 6.10197  | 6.730071 | 6.487269 |
| 7.435536 | 8.03579  | 9.179565 |
| 10.30989 | 10.12386 | 10.21503 |
| 9.241988 | 8.512267 | 9.429295 |
| 13.90757 | 13.55325 | 14.28014 |
| 5.559123 | 5.965202 | 6.014607 |
| 7.092532 | 7.853591 | 7.280884 |
| 4.837753 |          |          |
| 9.338648 | 9.821114 | 9.352842 |
| 8.899465 | 8.459125 | 8.919677 |
| 8.383332 | 8.807664 | 8.531042 |
| 8.681153 | 9.225812 | 9.784925 |
| 10.86971 | 10.55911 | 10.72141 |
| 9.635961 | 9.878625 | 9.37566  |
| 5.896929 |          | 6.019661 |
| 7.006019 | 8.730817 |          |
| 6.285113 | 6.903605 | 6.954594 |
| 6.602515 |          |          |
| 5.425757 | 4.718748 |          |
| 10.26303 | 10.5371  | 8.878334 |
| 6.389688 | 7.160148 | 6.678556 |
| 6.947779 | 7.768416 | 7.421674 |
| 5.153895 | 5.809334 |          |
| 8.355295 | 8.176623 | 8.711955 |
| 7.32875  | 7.682507 | 7.735665 |
| 8.616536 | 9.388568 | 8.112988 |
| 6.258771 | 6.77365  | 5.742871 |
| 9.967664 | 10.53071 | 9.198602 |
| 6.467126 | 6.515189 | 4.765964 |
|          | 3.787048 | 4.058301 |
| 6.140711 | 6.455573 | 7.348883 |
| 13.35034 | 13.2192  | 13.17772 |
| 6.978709 | 8.081052 | 7.065244 |
| 7.48386  | 7.958435 | 7.50081  |
| 6.087072 | 6.388837 | 5.875104 |
|          | 6.775142 | 6.923455 |
| 12.52752 | 12.15337 | 12.58771 |
| 8.946734 | 8.908533 | 8.697009 |

|          |          |          |
|----------|----------|----------|
| 9.898849 | 9.69902  | 10.04822 |
| 11.9578  | 12.10033 | 12.47684 |
| 5.617939 | 5.740003 | 5.385365 |
|          | 4.395602 |          |
| 7.289968 | 7.623927 | 7.231629 |
| 7.590405 | 7.042945 | 6.779641 |
| 7.393657 | 7.24907  | 7.386344 |
| 10.4834  | 10.51254 | 10.54492 |
| 5.073807 | 7.5338   | 8.214774 |
| 8.812387 | 9.17824  | 7.304806 |
| 10.40741 | 9.915738 | 10.13397 |
| 8.716761 | 8.751089 | 8.399661 |
| 7.671753 | 8.683544 | 8.216817 |
| 5.860484 | 6.787807 | 6.089    |
| 7.194755 | 6.733448 |          |
| 2.709469 |          |          |
| 7.858394 | 7.652539 | 7.604935 |
| 7.994321 | 8.223592 | 8.521316 |
| 8.172006 | 8.489666 | 6.959281 |
| 6.39955  | 7.238659 |          |
| 7.838751 | 6.488702 | 8.148247 |
| 7.81191  | 8.059018 | 8.158137 |
| 6.809394 | 6.662035 | 6.684791 |
| 8.749288 | 8.428502 | 8.71342  |
| 4.385314 | 5.480825 | 4.902043 |
| 10.44291 | 10.53133 | 10.13075 |
| 9.248299 | 9.668247 | 8.592311 |
| 9.978371 | 10.68024 | 9.757486 |
|          |          | 3.628846 |
| 9.831959 | 10.84809 | 9.075365 |
| 6.328254 |          | 5.438439 |
| 5.750998 | 5.798999 | 6.184383 |
|          | 5.97152  |          |
| 5.314123 | 5.9721   | 5.346778 |
| 7.904902 | 8.276533 | 7.633214 |
| 4.311289 | 5.279808 | 5.82936  |
| 8.045166 | 8.471181 | 6.849134 |
| 8.464411 | 8.287599 | 8.836504 |
|          | 5.162305 |          |
| 11.47755 | 11.09674 | 10.8386  |

|          |          |          |
|----------|----------|----------|
| 7.117816 | 6.797917 | 7.053311 |
| 6.782612 | 8.138623 | 7.49255  |
| 4.602306 | 5.82393  | 4.951856 |
| 7.080303 | 6.887708 | 7.388593 |
| 9.880309 | 9.439338 | 9.605532 |
| 5.982259 | 6.005762 | 6.2397   |
| 7.080185 | 6.61137  | 7.704442 |
|          | 6.208783 | 5.924299 |
| 7.808931 | 8.098107 | 8.179366 |
|          | 8.189249 |          |
| 5.757618 | 6.210204 | 6.395056 |
| 14.4942  | 14.11447 | 14.47134 |
| 12.50427 | 12.84665 | 12.96022 |
| 11.0506  | 10.96803 | 10.67116 |
|          | 6.164687 |          |
| 9.956785 | 10.27062 | 10.43191 |
| 9.366076 | 8.432051 | 9.912323 |
| 8.593488 | 8.345332 | 8.606189 |
| 13.14779 | 13.15735 | 13.07929 |
| 10.24763 | 10.7553  | 9.657015 |
| 13.99121 | 14.09854 | 13.50857 |
| 13.33914 | 12.45559 | 12.90564 |
| 10.88421 | 11.71062 | 9.774355 |
| 11.83638 | 11.89315 | 11.6052  |
| 10.03283 | 10.8945  | 10.3431  |
| 10.90785 | 11.356   | 11.11811 |
| 10.24764 | 10.16017 | 9.765225 |
| 7.022862 | 7.787778 | 6.97749  |
| 9.37972  | 10.05662 | 9.345945 |
| 11.35636 | 11.28376 | 11.5235  |
| 4.561991 |          |          |
| 6.677007 | 7.536461 | 5.913689 |
| 10.51336 | 10.4517  | 10.85337 |
| 8.600097 | 8.616914 | 9.054061 |
| 8.015419 | 7.707427 | 7.500907 |
|          | 5.68541  |          |
|          |          | 6.08097  |
| 7.16112  | 7.078385 | 6.597921 |
| 5.500244 | 5.008645 | 5.138822 |

|          |          |          |
|----------|----------|----------|
| 9.125676 | 8.617464 | 8.987709 |
| 4.226723 | 5.549935 |          |
| 9.306058 | 9.303937 | 9.854916 |
|          | 6.333466 | 6.14683  |
|          | 6.017605 |          |
| 7.893323 | 7.385161 | 7.627276 |
| 8.478675 | 8.91474  | 6.931105 |
| 7.772596 | 7.25159  | 7.747579 |
| 7.628611 | 7.034271 | 7.541014 |
| 8.027672 | 9.958313 | 9.702765 |
| 8.398367 | 9.572517 | 9.89311  |
| 8.241191 | 9.291443 | 8.711886 |
| 7.936784 | 9.297644 | 9.417776 |
| 9.149856 | 9.785061 | 10.33181 |
| 5.944034 | 6.32301  | 6.573757 |
| 4.91287  |          |          |
| 9.906908 | 9.757348 | 10.19687 |
| 5.256092 |          | 5.324191 |
| 12.19104 | 11.96132 | 12.73703 |
| 10.62799 | 10.37332 | 10.59163 |
| 11.92008 | 11.78706 | 11.57849 |
|          | 2.683391 | 4.171481 |
| 8.581384 | 8.522739 | 8.363874 |
|          |          | 5.882561 |
|          | 6.204143 | 6.548514 |
|          | 5.627169 |          |
| 5.785273 |          | 6.020843 |
| 11.14812 | 11.16703 | 10.60372 |
| 4.648177 |          | 6.543956 |
| 11.70358 | 11.70429 | 11.58813 |
| 7.488487 | 7.755015 | 7.697094 |
|          | 7.073682 | 4.993037 |
| 14.69093 | 14.65382 | 14.87758 |
| 7.913036 | 8.060896 | 7.766109 |
| 8.68607  | 9.265522 | 8.501872 |
|          | 3.026135 | 5.083832 |
| 7.983616 | 10.37902 | 2.526655 |
| 10.59955 | 10.47892 | 11.03201 |
| 6.441871 | 6.786887 | 6.712633 |
| 8.646656 | 8.606717 | 7.947223 |



|          |          |          |
|----------|----------|----------|
| 7.292936 | 7.778845 | 7.662329 |
| 5.659723 | 6.681518 | 6.289227 |
| 6.535998 | 6.779143 | 6.981844 |
| 11.75888 | 11.80668 | 11.53683 |
| 12.06159 | 11.73721 | 11.72373 |
| 11.47572 | 11.89892 | 11.78977 |
| 8.667391 | 8.38753  | 8.281796 |
| 6.781704 | 5.987444 |          |
| 9.529141 | 8.528244 | 9.676617 |
| 5.834914 | 6.818544 | 7.732596 |
| 6.764127 | 7.030363 | 7.266828 |
| 8.630137 | 7.301055 | 8.426485 |
| 8.057886 | 7.148498 | 8.364639 |
| 8.019004 | 6.992167 | 8.139576 |
| 8.88982  | 7.288402 | 8.984333 |
|          |          | 2.03067  |
| 15.21129 | 15.4199  | 15.37128 |
| 9.400864 | 8.673402 | 9.206601 |
| 10.64622 | 10.2195  | 10.43852 |
| 7.065091 | 7.388147 | 7.872187 |
| 8.141449 | 9.01056  | 8.76421  |
| 7.184875 | 8.304576 | 7.946756 |
| 7.511652 | 8.249466 | 7.638773 |
| 8.415389 | 8.829    | 8.470373 |
| 7.084791 | 6.939339 | 7.750214 |
|          |          | 2.745364 |
| 8.421445 | 6.424679 | 8.408428 |
| 5.748087 | 6.145711 | 5.896927 |
| 7.073175 | 8.586358 | 6.752479 |
| 9.268987 | 9.865167 | 9.673958 |
| 9.724316 | 9.246363 | 9.763058 |
| 7.151195 | 6.409763 | 5.166091 |
|          | 4.645636 |          |
| 9.036384 | 8.814594 | 9.517885 |
| 6.720086 | 6.701584 | 7.054201 |
| 11.80728 | 11.86837 | 11.75654 |
| 5.745501 | 4.696179 | 5.256904 |
| 9.337738 | 8.066821 | 10.51077 |
| 6.698609 | 7.971605 | 6.199291 |
|          |          | 4.89891  |

|          |          |          |
|----------|----------|----------|
| 11.3305  | 10.77615 | 11.39498 |
| 8.786017 | 10.27606 |          |
| 5.739409 | 5.855494 | 5.987829 |
| 10.10193 | 10.07312 | 9.849114 |
| 11.77221 | 11.83253 | 11.54842 |
| 9.043289 | 10.21297 | 7.714643 |
| 13.72089 | 13.56743 | 13.47566 |
|          | 8.522099 |          |
| 6.783058 | 7.969496 | 7.690518 |
| 6.814045 | 7.396046 |          |
| 9.272314 | 9.299246 | 9.399572 |
| 6.180928 | 5.816909 | 7.022845 |
| 11.96179 | 12.33228 | 10.77024 |
| 9.807179 | 9.674858 | 10.63337 |
| 10.15129 | 9.675688 | 10.23716 |
| 10.26069 | 10.93803 | 10.47204 |
| 6.61576  | 6.724022 | 7.016709 |
| 13.6108  | 14.03285 | 13.53656 |
| 11.76116 | 11.7891  | 11.79615 |
|          |          | 6.595226 |
| 9.946065 | 10.41746 | 9.545496 |
| 14.87388 | 14.93651 | 14.63658 |
| 14.17788 | 14.52813 | 13.69182 |
| 15.16258 | 15.10698 | 15.87046 |
| 12.22547 | 12.01153 | 11.58241 |
| 8.961903 | 9.822141 | 8.665522 |
| 13.41227 | 13.65516 | 13.71174 |
| 6.249577 | 6.656239 | 3.401209 |
| 11.29556 | 10.86178 | 11.37392 |
| 12.7939  | 14.26772 | 11.56413 |
| 7.960859 | 8.052547 | 7.316696 |
| 5.341284 |          |          |
| 9.908247 | 9.396473 | 11.02823 |
| 13.41695 | 13.57615 | 13.10549 |
| 9.071703 | 9.322059 | 7.572974 |
| 8.329286 | 9.066077 | 8.498055 |
| 2.924505 | 5.456162 |          |
| 4.125449 | 5.619964 | 6.192452 |
| 7.151253 | 9.111259 | 7.840505 |
| 9.941405 | 9.615335 | 9.508379 |

|          |          |          |
|----------|----------|----------|
| 9.339085 | 9.292714 | 9.27892  |
| 8.696522 | 8.033001 | 9.484395 |
| 3.075336 | 2.847005 |          |
| 12.71537 | 13.65122 | 13.97283 |
| 7.76489  | 9.296124 | 7.689222 |
| 10.76554 | 10.9506  | 10.47451 |
| 13.88772 | 14.56246 | 13.57672 |
| 10.02894 | 10.00186 | 10.25373 |
|          |          | 5.157896 |
|          | 5.071738 |          |
| 9.624965 | 8.911905 | 9.133513 |
| 12.33917 | 12.21762 | 12.42965 |
| 13.52191 | 13.48265 | 13.6888  |
| 7.834108 | 9.114268 | 7.475406 |
| 8.786105 | 8.739965 | 8.83376  |
| 6.331365 | 7.809678 | 6.198895 |
| 5.653633 | 6.957448 | 6.185515 |
| 6.488522 | 6.538824 |          |
| 11.1016  | 10.86221 | 11.07582 |
| 11.61439 | 11.41556 | 11.6675  |
| 11.66541 | 10.84142 | 11.89845 |
| 6.660949 | 7.045458 |          |
| 10.24711 | 9.437679 | 10.01227 |
| 7.913143 |          | 7.836612 |
| 11.31578 | 11.22932 | 10.62583 |
| 8.194793 | 9.206038 | 6.646702 |
| 11.07042 | 10.64721 | 11.12222 |
| 6.445642 | 6.628772 | 7.300154 |
| 9.212748 | 9.730519 | 8.836886 |
| 7.927797 | 7.870884 | 8.74822  |
| 12.37342 | 12.37789 | 12.12722 |
| 10.83091 | 11.06164 | 10.07012 |
| 9.224593 | 9.757153 | 8.333661 |
| 11.40809 | 10.62589 | 11.36364 |
| 5.822054 | 6.033014 | 7.347571 |
| 5.394984 | 7.376906 | 6.935107 |
| 9.131703 | 10.19507 | 8.491207 |
| 10.10685 | 9.659638 | 9.927188 |
|          | 6.088843 |          |
| 7.335943 | 7.356644 | 7.460887 |

|          |          |          |
|----------|----------|----------|
| 9.523307 | 9.488474 | 9.096473 |
| 6.412269 | 6.628639 | 5.214578 |
| 9.134353 | 9.291975 | 9.029186 |
| 6.701564 | 6.99441  | 7.24864  |
| 7.112769 | 6.683436 | 7.345315 |
| 10.59458 | 10.31814 | 10.16673 |
|          | 6.573405 | 6.782068 |
| 7.998324 | 7.849886 | 8.218987 |
| 9.763557 | 7.170425 | 8.76327  |
| 6.749876 | 6.704332 | 6.940513 |
| 3.949266 |          | 1.934554 |
| 12.20288 | 12.33262 | 10.08447 |
| 12.06553 | 11.8021  | 11.87813 |
| 14.99159 | 14.84658 | 15.11118 |
| 10.41062 | 10.64085 | 10.18282 |
|          | 4.590774 |          |
| 7.233469 |          | 6.251222 |
| 6.085577 | 7.350337 | 6.944328 |
| 11.36338 | 10.76228 | 10.94661 |
| 11.25605 | 11.25601 | 10.6367  |
|          |          | 5.20824  |
| 7.624553 | 7.940339 | 8.768082 |
| 5.850958 | 7.726032 | 6.532723 |
| 11.28655 | 10.56471 | 11.20368 |
| 10.89775 | 11.03038 | 11.11214 |
| 10.79699 | 10.10936 | 10.49963 |
|          | 2.936191 |          |
|          | 4.338343 |          |
| 8.92679  | 8.571187 | 8.456056 |
| 10.21118 | 10.22691 | 10.18018 |
| 9.418859 | 9.480842 | 9.922983 |
| 7.0591   | 6.789859 | 6.773761 |
| 12.46623 | 11.92108 | 12.96913 |
| 12.19642 | 11.59045 | 12.33081 |
| 8.028414 | 7.968088 | 7.61433  |
| 8.927083 | 9.009573 | 9.066719 |
| 7.229298 | 6.407477 | 7.787314 |
| 6.033307 | 5.716203 |          |

|          |          |          |
|----------|----------|----------|
| 9.467054 | 8.651835 | 9.921337 |
| 6.743424 | 7.608486 |          |
| 9.231111 | 9.229042 | 8.582094 |
| 8.356826 | 9.23351  | 6.923106 |
| 11.94536 | 11.38283 | 12.18037 |
| 10.80551 | 10.21858 | 10.83296 |
| 3.908093 | 5.657531 |          |
| 12.52811 | 12.26784 | 12.72573 |
| 4.659563 |          | 5.037797 |
| 11.70264 | 11.82605 | 11.51213 |
| 8.681347 | 8.261329 | 8.257281 |
| 11.71304 | 12.11614 | 11.87771 |
| 9.686441 | 9.905038 | 9.821222 |
| 8.645516 | 8.057025 | 8.022394 |
| 8.888681 | 8.660392 | 7.987668 |
| 10.36325 | 11.48157 | 10.97735 |
| 10.59308 | 11.66855 | 11.27419 |
| 5.110771 |          |          |
| 13.04955 | 13.44678 | 12.94927 |
| 8.594124 | 8.484402 | 8.837299 |
| 9.919835 | 10.01052 | 10.04124 |
| 8.526588 | 9.567018 | 7.640206 |
| 10.19622 | 9.347553 | 9.780608 |
| 9.244326 | 9.071251 | 9.766442 |
| 7.299932 | 8.093579 | 6.031214 |
| 10.81149 | 11.04932 | 11.25446 |
| 8.504097 | 9.093137 | 8.548393 |
| 5.51895  | 7.193088 | 7.261103 |
| 7.768374 | 7.285046 | 8.118572 |
| 10.68163 | 10.42166 | 10.99341 |
| 12.71028 | 12.79325 | 12.94196 |
| 5.124161 | 5.54122  | 5.87321  |
| 11.83095 | 11.90184 | 12.08042 |
| 4.122247 | 6.170262 |          |
| 8.474349 | 8.463448 | 8.080126 |
| 0.365793 |          |          |
| 9.668771 | 9.736031 | 8.325968 |
| 14.32309 | 14.22559 | 14.95047 |
|          | 6.496495 |          |
| 7.04379  | 6.622209 | 6.544251 |

|          |          |          |
|----------|----------|----------|
| 6.856442 | 6.52652  | 7.053337 |
| 10.59437 | 10.25415 | 10.39395 |
| 7.477374 | 7.246851 | 6.049832 |
| 6.434774 | 7.366221 |          |
| 11.86607 | 11.98605 | 11.93113 |
| 7.569901 | 8.688911 | 7.356954 |
| 12.07197 | 12.59047 | 11.63763 |
| 7.506846 | 7.347503 | 7.399001 |
| 13.26636 | 13.0183  | 13.53653 |
| 7.847327 | 7.851774 | 7.608252 |
| 8.032989 | 7.779625 | 8.017653 |
|          | 5.441955 | 6.353751 |
| 12.20524 | 11.10055 | 11.40827 |
| 10.86129 | 10.73618 | 11.1378  |
|          | 6.326276 | 3.319628 |
| 8.376395 | 9.790411 | 7.731924 |
|          | 5.030952 |          |
| 8.804034 | 8.417232 | 8.873038 |
| 5.582942 |          |          |
| 5.195649 |          |          |
| 1.68095  | 5.825769 | 4.0498   |
| 7.374219 | 7.259602 | 7.030646 |
|          |          | 6.727675 |
| 10.41474 | 12.24927 | 11.37938 |
| 8.70748  | 9.146326 | 7.848463 |
| 12.21392 | 12.60271 | 12.23388 |
| 8.794395 | 8.17737  | 8.876628 |
| 5.307811 | 6.267207 | 4.718121 |
| 7.437198 | 7.145255 | 7.292893 |
| 13.65919 | 13.8325  | 13.22923 |
| 6.691963 | 6.742085 | 7.175779 |
| 9.299805 | 8.954232 | 9.658061 |
| 8.518406 | 7.905089 |          |
|          |          |          |
| 10.415   | 10.85346 | 9.857562 |
| 12.11589 | 13.08778 | 10.893   |
| 7.941466 | 7.116009 | 7.632456 |
|          |          | 6.146439 |
| 7.89704  | 8.396867 | 7.732477 |
| 10.8486  | 11.44755 | 9.683717 |

|          |          |          |
|----------|----------|----------|
| 7.483697 | 8.310706 | 6.903976 |
| 11.60083 | 11.77043 | 11.54565 |
| 9.672323 | 9.745784 | 10.24808 |
| 8.862463 | 8.407662 | 8.9895   |
| 6.443759 | 6.535689 | 6.077105 |
| 7.00469  | 7.032377 | 6.767041 |
| 8.035865 | 8.186774 | 6.063947 |
| 13.39475 | 13.35817 | 12.77002 |
| 10.84872 | 11.2074  | 10.72142 |
| 5.692193 | 6.579151 | 5.048651 |
| 8.594014 | 7.976849 | 8.384059 |
|          | 7.019668 | 7.438423 |
| 9.896746 | 10.2346  | 10.19219 |
| 6.820595 | 6.784579 | 7.175102 |
| 4.729653 |          |          |
| 8.88464  | 9.920566 | 7.772    |
| 12.24287 | 11.66    | 11.73722 |
| 13.57698 | 13.64528 | 13.83003 |
| 14.11137 | 14.36187 | 14.08483 |
| 5.128385 |          | 6.16289  |
| 14.82409 | 14.42638 | 15.10491 |
|          | 6.687389 | 5.544117 |
| 8.483083 | 8.329052 | 7.55886  |
| 9.286884 | 10.24814 | 7.370559 |
| 6.473532 | 5.416556 | 6.700409 |
| 11.97284 | 12.18422 | 11.82523 |
| 9.662677 | 10.12336 | 9.941753 |
| 9.412299 | 9.314981 | 10.18013 |
| 11.10908 | 10.38774 | 11.57496 |
| 9.180574 | 8.45475  | 9.287816 |
| 7.121258 | 7.320438 | 7.297088 |
|          | 3.801825 | 2.64328  |
| 7.749874 | 8.415768 | 7.40403  |
| 8.784483 | 8.870864 | 8.799176 |
| 8.245659 | 9.121201 | 8.207809 |
| 8.59806  | 8.994    | 8.523286 |
| 10.91031 | 10.86784 | 10.34346 |
| 7.06975  | 6.373323 | 6.751081 |
| 9.497276 | 8.949865 | 9.402819 |
| 11.13474 | 11.53719 | 10.10401 |

|          |          |          |
|----------|----------|----------|
| 13.04606 | 12.99284 | 13.21694 |
| 13.03656 | 13.52401 | 12.50452 |
| 12.30948 | 11.06814 | 11.83682 |
| 7.537891 |          | 7.896489 |
| 6.424688 | 6.597257 |          |
|          | 6.041997 | 4.033008 |
| 6.10208  | 6.35483  |          |
| 9.891456 | 10.89078 | 9.561323 |
| 9.337044 | 10.9724  | 8.69824  |
| 9.869376 | 10.65052 | 10.28612 |
| 9.110766 | 10.56145 | 8.814419 |
| 10.25156 | 11.45752 | 9.416136 |
| 12.21248 | 13.46413 | 11.68652 |
| 9.712475 | 11.51418 | 9.40557  |
| 9.372406 | 11.49075 | 9.016935 |
| 9.308408 | 11.01919 | 8.779407 |
| 12.1665  | 12.8591  | 11.61655 |
| 6.752519 | 7.543023 | 7.299972 |
| 5.383806 |          |          |
|          |          | 5.339295 |
| 6.997266 | 9.697714 | 8.665399 |
| 9.765027 | 11.23555 | 9.496109 |
|          |          |          |
| 12.4239  | 13.73973 | 11.8712  |
| 6.392726 | 7.463943 | 6.3674   |
| 9.966936 | 11.6522  | 9.582558 |
| 7.589259 | 7.290282 | 7.652851 |
| 11.63168 | 11.85891 | 11.71969 |
| 12.35562 | 12.43514 | 12.27656 |
| 10.99529 | 12.39843 | 11.69197 |
| 12.92806 | 13.11925 | 12.84096 |
| 10.9894  | 11.99167 | 11.44014 |
| 5.303731 | 4.517563 | 5.70985  |
| 5.335006 | 4.720954 | 0.569999 |
| 6.753195 | 7.154933 | 8.064813 |
| 9.798749 | 9.057323 | 9.690245 |
| 8.749919 | 8.384706 | 8.083385 |
| 8.569286 | 8.25671  | 6.835653 |
|          |          | 6.681629 |
| 9.094794 | 8.377753 | 8.981377 |



|          |          |          |
|----------|----------|----------|
| 13.58081 | 12.46556 | 12.84874 |
|          |          | 5.538326 |
| 13.96179 | 12.93488 | 12.96993 |
| 8.728823 |          | 6.770572 |
| 12.23253 | 12.10195 | 12.23206 |
| 8.73823  | 8.730462 | 8.827471 |
| 9.249763 | 9.42275  | 9.692931 |
| 6.261773 | 7.487462 | 6.524619 |
| 8.691515 | 9.120665 | 8.52552  |
| 8.820437 | 8.397347 | 8.75069  |
| 12.13464 | 11.5798  | 12.13922 |
| 7.923338 | 8.505582 | 7.687008 |
| 6.62849  | 7.543568 | 5.74466  |
| 12.27905 | 13.23344 | 10.78221 |
| 7.97051  | 7.203319 | 7.764213 |
|          |          | 5.802865 |
| 5.494166 | 5.230672 |          |
| 7.164846 | 7.028793 | 7.894183 |
| 7.548503 | 7.477611 | 7.725591 |
| 5.27789  |          |          |
| 10.81711 | 10.80176 | 11.74063 |
|          | 5.910607 |          |
|          | 6.647645 | 6.312373 |
| 9.634931 | 9.4243   | 9.954151 |
| 7.848076 | 8.368113 | 7.050666 |
| 6.989876 | 8.405759 | 6.898202 |
| 2.802418 |          |          |
| 4.843068 | 5.947504 |          |
| 6.368374 | 6.456737 | 6.787104 |
| 4.335493 |          |          |
|          |          | 6.848105 |
| 8.911046 | 8.813438 | 9.143924 |
| 6.329696 |          | 6.052134 |
| 6.854653 | 7.879537 | 7.794885 |
| 6.328369 | 7.045711 | 6.489132 |
| 11.10626 | 11.31972 | 11.5858  |
|          | 6.006149 | 5.395156 |
| 7.824382 | 8.284161 | 8.230021 |
|          | 6.632085 | 8.077314 |

|          |          |          |
|----------|----------|----------|
| 6.547451 | 6.539226 | 6.020054 |
|          | 3.341153 | 3.730946 |
| 11.87075 | 13.91153 |          |
| 8.298971 | 9.574888 | 8.924085 |
| 8.323961 | 8.67109  | 8.194758 |
| 11.50089 | 12.02178 | 11.6361  |
|          | 5.907854 | 5.150787 |
|          | 6.951063 |          |
| 3.059182 | 4.802445 | 9.545567 |
| 8.728292 | 8.712577 | 8.843143 |
| 10.41602 | 10.37811 | 10.20904 |
| 9.700523 | 9.760009 | 9.633858 |
| 7.789702 | 7.413766 | 7.761907 |
| 8.347428 | 8.609103 | 8.935781 |
| 7.261457 | 8.945548 | 7.421388 |
| 8.665502 | 9.63733  | 9.153566 |
| 4.555988 |          |          |
| 11.70609 | 12.22792 | 11.67155 |
| 9.123734 | 9.332459 | 8.507441 |
| 9.662525 | 5.241696 | 7.518244 |
| 7.98743  | 7.688742 | 7.595375 |
| 9.057176 | 8.984371 | 9.385851 |
| 9.697216 | 9.475399 | 10.02924 |
| 10.52361 | 10.49277 | 10.59596 |
| 12.45471 | 12.40108 | 12.47019 |
| 7.086403 | 6.258344 | 7.399095 |
| 5.837408 | 5.181306 | 6.407326 |
| 8.401811 | 9.904595 | 8.592352 |
| 8.07126  | 9.638452 | 8.404433 |
| 11.49979 | 12.05911 | 10.80191 |
| 7.312837 | 8.486036 |          |
| 6.261217 | 5.350737 | 4.5409   |
| 9.959175 | 9.548139 | 10.06516 |
| 10.09065 | 10.67328 | 10.0367  |
| 9.337287 | 9.24796  | 8.512004 |
|          | 5.966386 | 3.405294 |
| 9.067236 | 9.870003 | 9.18116  |

|          |          |          |
|----------|----------|----------|
| 11.24905 | 10.88022 | 11.13466 |
| 7.805832 | 7.932932 | 7.330222 |
| 6.599129 | 7.249801 | 6.145936 |
|          |          | 5.637145 |
| 9.360879 | 9.464715 | 9.468309 |
| 9.706221 | 9.563477 | 9.600446 |
| 9.055522 | 9.845928 | 7.858708 |
| 10.96842 | 11.1391  | 11.37506 |
| 6.247928 | 6.544971 |          |
| 8.357907 | 8.392217 | 8.080904 |
| 9.889991 | 9.48455  | 10.18682 |
| 10.21641 | 9.378465 | 9.575573 |
| 5.077633 |          |          |
| 9.954607 | 9.269033 | 10.10681 |
| 9.656323 | 10.17728 | 9.47066  |
| 6.990914 | 7.766567 | 6.782054 |
| 6.07393  | 5.726925 | 6.007875 |
| 7.218148 | 7.723122 | 6.700123 |
| 6.337892 | 6.91     | 7.143611 |
| 9.74709  | 10.14313 | 10.60282 |
| 8.444635 | 8.793505 | 9.475509 |
| 5.096094 | 5.015448 | 4.956142 |
| 11.13159 | 10.96685 | 10.97607 |
| 9.302094 | 9.798993 | 9.349134 |
| 9.535584 | 9.587    | 9.426136 |
| 9.48756  | 9.352061 | 8.895792 |
| 6.052704 |          | 6.317461 |
| 7.062156 | 4.194136 |          |
| 9.492764 | 9.609572 | 9.316064 |
| 5.640822 | 6.544972 | 5.676063 |
| 7.1297   | 6.875159 | 7.163783 |
| 8.977022 | 9.075701 | 8.642617 |
| 11.81573 | 12.69806 | 11.53028 |
| 9.799479 | 9.719887 | 10.30484 |
| 7.988555 | 8.023725 | 8.126437 |
| 5.641276 | 7.292891 |          |
| 10.06964 | 10.21625 | 10.52234 |
| 12.89876 | 12.68079 | 13.03155 |
| 7.80444  | 8.307395 | 7.559947 |
| 7.518578 | 7.201267 | 7.134035 |

|          |          |          |
|----------|----------|----------|
| 7.745014 | 6.945724 | 7.622801 |
|          |          | 6.889075 |
| 11.57914 | 11.63879 | 11.3417  |
| 5.974562 | 7.114563 | 7.197475 |
| 6.399281 | 5.788496 | 5.88106  |
| 10.70793 | 11.15328 | 10.41997 |
| 8.114651 | 8.237976 | 8.429488 |
| 14.83413 | 15.06897 | 15.4461  |
| 10.31237 | 11.30508 | 10.96288 |
| 7.45396  | 7.254747 | 7.389455 |
| 11.01436 | 11.5126  | 11.44407 |
|          | 5.657411 |          |
| 7.578635 | 9.204971 | 8.323767 |
| 7.708075 | 7.623496 | 8.094794 |
| 11.75232 | 11.92587 | 11.30464 |
| 11.80605 | 12.26338 | 11.53374 |
| 9.770862 | 9.857604 | 9.608259 |
| 7.737052 | 7.765333 | 8.074221 |
| 5.513281 | 5.271175 |          |
| 9.456395 | 10.75304 | 9.998158 |
| 10.24129 | 10.01336 | 10.51622 |
| 7.325173 | 6.989868 | 6.531348 |
| 10.28242 | 10.59703 | 9.377663 |
| 8.588259 | 9.003907 | 9.189615 |
|          |          | 6.141677 |
|          |          | 5.734518 |
| 7.897333 | 7.702059 | 7.486413 |
| 7.983983 | 7.60374  |          |
| 7.398112 | 8.801374 | 5.795592 |
| 8.550035 | 8.750301 | 8.640719 |
| 5.491011 | 5.531819 | 5.887114 |
| 11.08265 | 10.31693 | 11.06693 |
| 10.90133 | 11.71195 | 10.52421 |
| 7.676548 | 8.805545 | 6.87266  |
| 6.660839 | 5.439681 | 6.702791 |
| 8.361938 | 8.471765 | 7.620892 |
| 10.66462 | 10.80342 | 10.4892  |
| 7.220591 | 6.903047 | 7.303279 |
| 8.532206 | 9.019483 | 8.732098 |

|          |          |          |
|----------|----------|----------|
| 8.193912 | 9.253862 | 8.458029 |
| 13.2029  | 12.34662 | 13.40365 |
| 5.991795 | 5.89032  | 6.234623 |
| 7.858279 | 8.333306 | 8.188055 |
| 7.060325 | 7.622229 | 6.66593  |
| 8.838319 | 8.409805 | 8.680104 |
| 5.295163 |          | 5.894144 |
| 9.981342 | 9.709312 | 9.942519 |
| 11.6181  | 11.99495 | 12.31818 |
| 8.617783 | 8.713609 | 8.772221 |
| 10.41054 | 10.37689 | 10.3996  |
| 10.03279 | 9.771232 | 9.357093 |
| 11.04303 | 10.57089 | 11.1591  |
| 7.288176 | 8.814056 | 5.903338 |
| 4.864001 | 6.126684 | 6.084568 |
| 10.52074 | 10.15996 | 10.21421 |
| 5.65487  | 6.59729  | 6.032966 |
|          | 5.320695 |          |
|          |          | 5.518857 |
| 6.298968 | 5.838764 | 5.529496 |
| 10.78461 | 11.00596 | 10.47927 |
| 6.552501 | 7.075649 | 7.297303 |
| 6.982395 | 6.289485 | 7.181021 |
| 7.051494 | 7.804681 | 6.809253 |
| 5.854587 | 6.596688 | 6.357753 |
| 7.914166 | 7.393409 | 7.462481 |
| 12.14637 | 12.17129 | 11.54452 |
| 5.069907 |          |          |
| 7.889602 | 7.554742 | 8.216385 |
| 11.89855 | 11.91027 | 12.14217 |
| 9.466306 | 9.03703  | 9.271106 |
| 12.01189 | 11.55589 | 11.62716 |
| 12.7173  | 13.20309 | 12.92941 |
| 9.815219 | 9.453646 | 9.062447 |
| 9.692717 | 9.644877 | 10.38139 |
|          |          |          |
| 5.606302 | 6.697591 | 6.461432 |
| 4.883072 | 5.702696 |          |
| 5.586994 |          |          |
| 11.20895 | 11.455   | 11.13346 |

|          |          |          |
|----------|----------|----------|
| 6.077445 | 2.222345 | 6.228653 |
| 12.54252 | 11.8957  | 12.43426 |
| 12.64974 | 12.08299 | 12.63823 |
| 6.580513 | 7.313288 | 7.108122 |
| 7.468806 | 7.85875  | 6.766872 |
| 5.659847 |          |          |
|          | 5.600666 | 4.879586 |
| 10.36229 | 10.1831  | 10.10043 |
| 5.788214 |          | 6.514889 |
| 9.032986 | 9.163604 | 8.028404 |
| 9.118072 | 8.8483   | 8.499706 |
| 7.503372 | 7.314457 | 7.110916 |
| 11.69587 | 11.90382 | 11.68661 |
| 5.860679 | 6.164063 | 6.941399 |
|          | 5.996062 |          |
| 14.24542 | 13.99173 | 14.13414 |
| 9.617232 | 10.43055 | 9.934818 |
| 10.44793 | 10.41161 | 10.38416 |
| 8.849754 | 9.910501 | 8.192794 |
| 9.666647 | 10.17927 | 10.31875 |
| 13.61861 | 13.46166 | 13.69334 |
| 5.849945 | 6.594685 | 6.162773 |
|          | 6.283598 | 6.587575 |
| 11.85031 | 11.72579 | 11.47929 |
| 5.950614 | 6.94211  | 5.510966 |
|          | 5.371139 |          |
| 7.217291 | 8.261008 |          |
| 8.274049 | 8.00551  | 7.871663 |
| 11.02851 | 10.41691 | 10.62369 |
|          | 6.171397 |          |
| 8.610912 | 8.523377 | 8.521215 |
| 11.0824  | 10.43052 | 10.95315 |
|          |          |          |
| 11.9982  | 11.77854 | 11.91613 |
| 6.261892 | 7.409997 | 7.509452 |
| 6.598731 | 7.874957 |          |
| 13.05578 | 13.15593 | 13.09561 |
| 9.601471 | 9.837548 | 9.238564 |
| 10.83734 | 10.66947 | 11.68121 |
| 5.104499 | 7.086192 | 7.636709 |

|          |          |          |
|----------|----------|----------|
| 7.295456 | 6.931645 | 7.808924 |
| 7.97195  | 7.476626 | 7.807508 |
| 8.998984 | 8.446837 | 8.717972 |
| 8.473203 | 7.662777 | 7.636005 |
|          | 5.175696 |          |
|          |          | 5.185392 |
|          | 7.133407 | 6.865841 |
| 5.940912 | 5.993061 | 6.061149 |
| 8.065467 | 7.98297  | 7.390166 |
| 6.868845 | 6.961249 | 6.905242 |
| 7.395987 | 8.004394 | 8.290504 |
| 6.88502  | 6.2692   | 7.022912 |
| 7.057022 | 7.387847 | 7.476829 |
| 10.818   | 11.388   | 10.79975 |
| 7.232563 | 7.719287 | 8.349798 |
| 6.678645 | 6.036742 | 6.887882 |
| 6.312978 | 6.342784 | 7.133173 |
| 5.893144 | 7.052385 | 7.500472 |
| 13.15162 | 12.83466 | 12.83091 |
| 7.658059 | 7.567543 | 8.01166  |
| 6.291055 | 5.840968 |          |
| 7.11443  | 5.872158 | 6.969477 |
| 7.67827  | 7.008456 | 8.193526 |
| 5.892272 | 6.656747 | 7.383701 |
| 12.63027 | 12.19594 | 12.92396 |
| 8.757382 | 8.235813 | 8.453893 |
| 10.95877 | 11.4363  | 10.12067 |
| 6.943461 | 7.20274  | 7.287735 |
| 9.842101 | 10.75205 | 10.36945 |
| 9.020274 | 8.955104 | 9.062563 |
| 12.76513 | 12.58583 | 12.74576 |
| 8.755307 | 9.748317 | 8.139381 |
| 8.469521 | 8.808424 | 8.04931  |
| 10.16734 | 10.64748 | 9.436232 |
| 6.327048 |          | 6.373313 |
| 10.12802 | 10.33203 | 10.26677 |
|          |          | 4.868063 |
| 9.435006 | 9.417698 | 9.436028 |
| 10.17114 | 10.02783 | 10.29591 |
| 12.42131 | 12.71334 | 11.89342 |

|          |          |          |
|----------|----------|----------|
| 8.7275   | 8.646419 | 8.943906 |
| 3.173165 |          | 4.92021  |
| 10.06559 | 10.26922 | 10.60841 |
| 9.784607 | 9.477715 | 10.08814 |
| 10.19841 | 10.82264 | 10.16918 |
|          | 5.394131 |          |
| 5.519426 | 6.433227 | 6.584076 |
| 8.182364 | 7.986552 | 7.933942 |
| 8.171648 | 8.698582 | 8.903771 |
| 12.30598 | 12.09091 | 12.02595 |
| 6.592469 |          | 7.364042 |
| 10.27804 | 10.28078 | 10.56085 |
| 5.938452 |          |          |
| 7.91514  | 8.000981 | 8.705922 |
| 6.127686 | 7.38081  |          |
| 12.78146 | 12.49615 | 12.75471 |
| 6.640768 | 7.98732  | 6.040922 |
| 8.932552 | 8.531946 | 8.559989 |
| 6.595092 | 6.615746 | 6.875755 |
| 5.628002 |          | 5.681466 |
| 5.535792 | 5.646543 | 5.330748 |
| 9.217475 | 9.239605 | 9.359191 |
|          | 6.163857 | 6.358484 |
| 11.54042 | 11.2448  | 11.37556 |
| 7.643453 | 8.393171 | 7.345109 |
| 12.74636 | 13.29044 | 12.89428 |
| 15.1948  | 14.85716 | 15.73112 |
| 12.62409 | 13.10131 | 12.92911 |
| 3.738598 |          |          |
| 8.567322 | 8.403663 | 8.499547 |
| 11.90629 | 11.62077 | 11.52926 |
| 8.102467 | 9.554655 | 8.428134 |
| 10.62719 | 10.52135 | 10.54686 |
| 8.22996  | 8.284081 | 8.249242 |
| 7.38323  | 7.616692 | 7.581412 |
| 7.465894 | 7.913107 | 7.029529 |
| 12.43539 | 12.6102  | 12.75392 |
| 6.739255 | 6.757892 | 6.802462 |
| 6.951047 | 7.11781  | 7.441578 |



|          |          |          |
|----------|----------|----------|
| 5.987222 | 6.642489 | 7.623231 |
| 6.98045  | 7.650352 | 7.051617 |
| 11.99178 | 12.12902 | 11.63594 |
| 8.911444 | 8.707326 | 9.218896 |
| 6.871689 | 7.359185 | 6.807749 |
| 13.1952  | 13.2556  | 13.16982 |
| 5.739326 | 6.113858 |          |
| 6.725519 | 5.964546 | 6.508818 |
| 8.616741 | 9.36324  | 9.489414 |
| 12.3638  | 12.65574 | 12.81202 |
|          | 6.051529 |          |
| 2.587802 |          |          |
| 6.946255 | 8.74178  | 7.864017 |
|          | 2.697707 | 2.983725 |
| 6.015489 | 5.27518  |          |
| 9.889835 | 9.383945 | 8.944568 |
| 14.22082 | 13.84984 | 14.51566 |
| 8.003345 | 8.554029 | 8.021753 |
|          | 6.883472 | 7.348767 |
| 7.876196 | 7.346278 | 7.834256 |
| 9.941876 | 10.00313 | 10.40465 |
| 10.73874 | 10.41722 | 11.15415 |
| 10.39862 | 10.57039 | 10.02745 |
| 11.76273 | 12.09917 | 12.19003 |
|          | 7.762252 | 8.013004 |
| 10.35006 | 10.69521 | 10.26663 |
| 6.968594 | 6.437479 |          |
| 12.36103 | 12.25172 | 10.92633 |
| 9.592292 | 10.23009 | 9.793472 |
| 6.07724  | 6.065334 | 6.597744 |
| 12.38692 | 11.94883 | 12.175   |
| 6.849137 | 6.549173 | 7.161541 |
| 6.743723 | 6.353423 | 6.640327 |
| 6.556809 | 7.138774 | 7.589262 |
| 5.732758 | 6.740583 | 6.965092 |
| 13.80464 | 13.35763 | 13.69487 |
| 9.99599  | 9.581973 | 9.917448 |
| 6.45491  | 4.930183 |          |
| 5.512087 |          |          |
|          | 6.004109 |          |

|          |          |          |
|----------|----------|----------|
| 8.396573 | 8.245953 | 8.691921 |
| 5.38621  | 5.254345 | 5.595935 |
| 12.65864 | 13.35714 | 13.07276 |
| 11.95273 | 12.63493 | 12.36321 |
| 9.043097 | 9.606757 | 9.002723 |
| 7.391277 | 8.011909 | 6.42686  |
| 5.016079 | 5.519544 | 2.302717 |
|          | 6.025081 | 6.641683 |
| 5.146417 | 6.057058 | 6.561239 |
| 7.248621 | 8.518148 | 7.910985 |
| 10.65427 | 11.41135 | 10.91502 |
| 12.12336 | 12.27864 | 12.43385 |
| 8.102789 | 8.444468 | 7.698258 |
| 3.39677  | 6.581762 | 5.704224 |
| 10.50201 | 9.872245 | 10.23421 |
| 10.18982 | 9.534921 | 10.0346  |
| 11.40682 | 11.76417 | 12.04792 |
| 13.98942 | 14.14939 | 13.33679 |
| 10.41214 | 11.02975 | 11.14047 |
| 6.290927 | 8.494998 |          |
| 11.45035 | 10.62368 | 11.5271  |
|          |          | 3.574477 |
| 8.810858 | 9.534138 | 7.489146 |
| 6.608785 | 5.442405 |          |
| 8.527116 | 7.83294  | 8.829908 |
| 6.67137  | 7.100331 | 8.129252 |
| 7.634075 | 6.830063 | 7.146885 |
| 9.80281  | 10.89284 | 8.948605 |
| 8.056796 | 7.486761 | 6.550255 |
| 9.471493 | 9.220893 | 9.64263  |
| 9.110069 | 9.411245 | 8.506704 |
| 2.530841 |          |          |
| 6.175909 | 5.803467 | 7.61622  |
| 6.944491 | 7.475936 | 7.111713 |
| 7.384348 | 7.743436 | 8.523805 |
| 8.481561 | 8.750525 | 9.053144 |
| 11.70889 | 12.4865  | 11.55841 |
| 10.80369 | 11.07394 | 11.04343 |
|          | 5.759676 | 4.400199 |
| 7.014944 | 6.896464 | 6.886777 |

|          |          |          |
|----------|----------|----------|
| 10.12244 | 10.43141 | 9.794045 |
| 8.610467 | 8.75958  | 8.349713 |
| 5.272218 | 6.602738 | 6.133785 |
| 11.49041 | 11.23355 | 10.90549 |
| 10.75963 | 11.40908 | 9.535354 |
| 5.744873 |          |          |
| 7.406531 | 8.082328 | 6.829594 |
| 8.355016 | 8.189554 | 7.972907 |
| 9.661348 | 8.954349 | 9.641108 |
| 9.151262 | 9.55472  | 9.619921 |
| 7.676692 | 7.661247 | 7.896391 |
| 7.109827 | 6.169004 | 7.290622 |
| 11.28969 | 10.92636 | 11.31413 |
| 11.11247 | 11.04034 | 11.07308 |
|          | 6.542253 | 5.23214  |
| 5.845169 | 6.656606 |          |
| 8.617047 | 9.841587 | 8.702637 |
| 7.717454 | 7.89439  | 7.154229 |
| 6.022393 | 6.527596 |          |
|          | 8.37016  | 8.843745 |
| 7.335355 | 7.378383 | 8.247674 |
| 6.289828 | 5.895812 | 6.534744 |
| 5.39985  | 6.168743 |          |
| 7.192197 |          |          |
| 5.799589 | 5.885122 | 6.984191 |
| 4.570376 | 5.04562  | 6.335801 |
| 1.638436 | 5.577429 | 5.827726 |
| 7.78293  | 8.070215 | 7.910244 |
| 3.421166 |          |          |
| 6.237135 | 6.717589 | 6.562517 |
| 10.49338 | 9.863244 | 10.31937 |
| 5.649115 | 5.470084 | 6.295529 |
| 8.567257 | 7.842594 | 8.533885 |
| 9.321155 | 9.186974 | 9.858442 |
| 7.897342 | 7.038871 | 7.836054 |
| 9.93922  | 9.822335 | 9.641911 |
| 6.529575 | 6.312895 | 6.392465 |
|          |          | 4.240715 |
| 7.443634 | 6.825381 | 7.957551 |
| 5.353044 |          | 5.728739 |

|          |          |          |
|----------|----------|----------|
|          |          | 3.626773 |
| 7.746359 | 8.339904 | 7.80539  |
| 5.571599 | 7.082231 |          |
| 6.307392 |          | 5.980459 |
| 8.745776 | 8.794655 | 8.925958 |
| 10.22135 | 10.36845 | 10.29903 |
|          | 6.653939 | 6.204329 |
| 8.12686  | 9.067861 | 6.769313 |
| 6.731357 | 7.187506 | 7.215325 |
| 6.044981 | 7.244253 | 5.807461 |
| 4.82225  | 6.619124 |          |
|          | 6.828135 | 7.547948 |
| 6.325749 | 7.077396 | 5.072325 |
| 6.410131 | 6.796797 | 6.272797 |
| 8.646585 | 9.498066 | 8.750011 |
| 8.344233 | 7.580081 | 8.477096 |
| 11.0271  | 10.45957 | 11.21096 |
| 5.972516 |          |          |
| 5.263138 | 5.901819 |          |
| 5.84645  | 5.479529 | 4.511091 |
| 11.73589 | 11.33998 | 12.1602  |
| 8.225406 | 7.897427 | 8.951117 |
| 1.632274 | 5.71043  | 5.178651 |
| 5.844427 | 6.329103 | 5.598239 |
|          | 7.094677 |          |
| 7.273272 | 6.582662 |          |
| 7.896077 |          |          |
| 7.238096 |          | 6.010927 |
| 9.202241 | 9.355677 | 9.493208 |
| 6.431288 | 5.973048 | 6.542022 |
| 6.577901 | 7.355499 | 6.448737 |
|          | 6.814036 |          |
| 7.79431  | 7.58418  | 7.626661 |
| 8.660241 | 8.911149 | 8.414395 |
|          |          | 4.847051 |
| 6.822913 | 8.015464 | 7.429366 |
| 6.070062 | 5.765892 | 6.823992 |
| 5.59016  | 7.049284 |          |
| 6.981705 | 6.133726 | 6.398729 |

|          |          |          |
|----------|----------|----------|
| 6.791043 | 6.13109  |          |
| 9.044435 | 10.60133 | 6.929233 |
| 10.10504 | 10.2783  | 10.03534 |
| 6.37987  |          | 6.512773 |
|          |          | 5.421093 |
|          | 6.002887 | 5.543023 |
| 9.589819 | 9.166298 | 8.457278 |
| 7.963171 | 8.556884 | 8.074722 |
| 4.831077 | 5.755506 | 6.349981 |
| 5.461052 | 4.99014  | 5.708518 |
| 7.843881 |          |          |
|          | 5.580991 |          |
| 5.881549 |          |          |
| 5.038694 | 6.423765 | 5.454749 |
| 7.308663 | 7.592117 | 6.998614 |
| 9.044775 | 8.737573 | 9.076049 |
|          |          | 5.53677  |
| 7.53467  | 7.919681 | 7.596252 |
| 11.36852 | 13.18863 | 12.57153 |
| 9.012459 | 7.631049 | 7.99809  |
| 5.017849 |          |          |
|          | 6.217808 | 6.598105 |
| 7.952117 | 8.38656  | 6.805513 |
| 7.814414 | 7.871653 | 7.827611 |
| 9.562934 | 8.803492 | 9.086241 |
| 7.684201 | 7.794363 | 8.102492 |
| 10.86495 | 11.48726 | 10.29124 |
|          |          |          |
| 4.832373 |          | 5.838804 |
| 8.976179 | 9.081759 | 9.440337 |
| 5.512355 |          | 5.442026 |
| 9.102477 | 9.145832 | 9.055973 |
| 6.376966 | 5.765449 | 6.130738 |
| 8.12869  | 9.795465 | 8.472953 |
| 7.837884 | 7.842172 | 7.925354 |
| 10.15181 | 11.45364 | 10.71395 |
| 10.83288 | 12.40646 | 10.5879  |
| 9.078275 | 10.08535 | 9.649163 |
| 6.951238 | 6.498424 | 7.108205 |
| 6.453208 | 6.102958 |          |

|          |          |          |
|----------|----------|----------|
| 11.09601 | 11.68327 | 11.63144 |
| 5.551885 | 5.290036 | 6.098535 |
| 10.34499 | 10.6498  | 9.98585  |
| 10.48105 | 11.01904 | 10.68344 |
| 11.73495 | 11.91028 | 11.63193 |
| 11.41311 | 11.36705 | 11.20534 |
| 10.87769 | 10.78919 | 10.6934  |
| 11.12403 | 10.31244 | 11.05098 |
| 9.488462 | 8.638145 | 8.928288 |
| 12.54807 | 12.65239 | 12.41161 |
| 6.697884 | 6.380082 | 6.658518 |
| 8.448867 | 9.279964 | 7.971051 |
| 8.453841 | 9.234495 | 8.308009 |
| 7.395752 | 8.506824 | 7.957227 |
| 9.709569 | 9.202782 | 9.054235 |
| 5.115118 | 7.666935 | 6.479431 |
| 10.79166 | 10.22758 | 10.9683  |

|          |          |          |
|----------|----------|----------|
| 10.97932 | 11.67598 | 11.06036 |
| 6.485835 | 7.22316  | 6.741708 |
| 11.48409 | 11.41925 | 11.40588 |
| 8.610616 | 8.279309 | 8.362164 |
| 12.21795 | 13.093   | 11.96389 |
| 10.88167 | 10.80726 | 10.83527 |
| 7.198494 | 7.030685 | 7.22648  |
| 5.886548 |          | 6.421647 |
| 9.925744 | 9.828573 | 10.42185 |
| 9.825755 | 9.537051 | 9.989123 |
| 11.45474 | 11.37544 | 11.43737 |
| 6.133972 | 6.741915 | 6.851718 |
| 7.695816 | 7.73771  | 6.538514 |
| 9.131172 | 9.235449 | 9.70893  |
| 9.016631 | 8.5981   | 8.642086 |
| 8.972502 | 8.805728 | 8.571185 |
| 6.845145 | 6.625588 |          |
| 7.948437 | 8.638284 | 7.930809 |
| 7.988308 |          |          |
| 7.161987 | 8.698983 | 6.683416 |
| 10.92986 | 10.68797 | 11.14137 |
|          | 3.137029 |          |

|          |          |          |
|----------|----------|----------|
| 10.2058  | 10.4901  | 9.908817 |
| 5.273284 | 6.753216 | 6.560225 |
| 8.122032 | 9.008204 | 7.040765 |
| 8.059732 | 8.599331 | 7.261963 |
| 8.815547 | 8.854309 | 8.363893 |
| 11.12513 | 11.06009 | 10.29285 |
| 5.387946 | 6.153476 | 6.760379 |
| 10.14771 | 9.271585 | 10.00077 |
| 9.911808 | 9.642673 | 9.647917 |
| 7.890719 | 7.085533 | 8.102069 |
| 9.283665 | 8.482694 | 11.16778 |
| 7.957944 | 9.249369 | 6.949232 |
| 6.137603 | 5.586439 |          |
| 12.07676 | 11.85581 | 11.77654 |
| 8.459722 | 8.522415 | 8.312315 |
| 6.962053 | 7.241355 | 6.824256 |
| 7.721628 | 7.805829 | 8.223711 |
| 11.44558 | 11.35641 | 11.0547  |
| 11.50106 | 11.68415 | 11.4516  |
| 9.482214 | 10.44453 | 8.742331 |
| 6.032653 |          | 6.9471   |
| 6.131984 | 6.017982 |          |
| 7.893378 | 8.350196 |          |
| 5.996873 | 6.6794   | 6.137244 |
| 11.81975 | 12.00384 | 11.44855 |
| 7.784874 | 8.30946  | 7.457232 |
| 7.932742 | 8.533718 | 9.08474  |
| 9.078094 | 9.077424 | 8.013449 |
|          | 8.1139   | 8.287787 |
| 11.14166 | 10.5598  | 11.16167 |
| 8.430193 | 8.866626 | 8.386064 |
| 7.615918 | 7.865708 | 8.033858 |
| 7.281657 | 7.636344 | 7.378327 |
| 3.442868 |          |          |
| 9.636972 | 8.755473 | 8.561478 |
|          | 6.763753 |          |
| 5.557747 | 7.28798  | 5.565493 |
| 12.93267 | 13.61091 | 12.47506 |
| 6.68013  | 7.05784  | 7.398585 |

|          |          |          |
|----------|----------|----------|
| 8.164167 | 7.540622 | 8.337561 |
| 7.989921 | 7.345074 | 8.069293 |
| 8.931651 | 8.366824 | 8.977898 |
|          |          | 4.098031 |
| 6.386263 | 6.785315 | 6.553613 |
| 7.517061 | 7.816239 | 7.598485 |
|          | 5.200253 |          |
| 5.91845  | 6.632634 |          |
| 10.2809  | 10.07974 | 9.994492 |
| 7.937897 | 8.241502 | 7.373666 |
| 8.513696 | 9.04833  | 9.12359  |
| 6.028595 | 6.51052  | 5.383449 |
| 12.88445 | 13.412   | 12.74948 |
| 8.719237 | 8.945117 | 8.941667 |
| 7.64707  | 6.783458 | 7.522125 |
| 7.618456 | 7.258467 | 8.622001 |
| 8.030068 | 7.813313 | 8.213613 |
| 6.50369  | 7.174961 |          |
| 8.28214  | 9.56662  | 6.797248 |
| 9.899898 | 9.917843 | 9.55165  |
| 7.926505 | 8.264883 | 7.556189 |
| 8.006134 | 7.750829 |          |
| 10.02928 | 9.56798  | 10.02071 |
| 6.759787 | 7.186482 | 5.992346 |
| 7.66083  | 7.880467 | 8.081257 |
| 12.7313  | 12.54468 | 12.87807 |
| 6.123308 |          |          |
| 7.438656 | 8.287956 | 7.991607 |
| 8.570795 | 9.701659 | 9.093346 |
| 10.50323 | 11.29441 | 10.61079 |
| 6.121655 | 7.738317 | 7.446175 |
|          |          | 5.235316 |
| 6.031564 | 6.720483 | 6.347051 |
| 10.25784 | 10.51157 | 9.97447  |
| 10.74726 | 10.81109 | 10.42687 |
| 5.044932 | 5.991314 |          |
| 5.650115 | 6.747584 |          |
| 3.383965 | 6.672813 | 7.588829 |
| 6.145301 |          | 6.226788 |
| 8.805176 | 8.112985 | 8.479747 |



|          |          |          |
|----------|----------|----------|
| 9.930939 | 10.9439  | 9.165631 |
| 5.912698 | 6.536735 | 3.069119 |
| 11.86616 | 12.38371 | 12.07226 |
| 12.59227 | 12.24437 | 12.42345 |
| 10.14814 | 10.04565 | 10.28108 |
| 14.1797  | 13.70041 | 14.56509 |
| 10.20768 | 9.757417 | 9.407446 |
| 6.361781 |          |          |
| 8.969484 | 8.732783 | 8.609058 |
| 8.744617 | 8.896651 | 8.257858 |
| 8.523024 | 7.830763 | 7.732183 |
| 2.798302 | 4.367511 | 5.2832   |
| 7.37239  | 8.65308  | 7.43467  |
| 9.413937 | 9.743342 | 9.941993 |
| 7.839232 | 8.77305  | 6.259564 |
| 11.13854 | 13.07689 | 12.47252 |
| 7.701888 | 8.084984 | 8.625682 |
| 9.303769 | 9.420585 | 9.223821 |
| 8.495873 | 8.501966 | 8.576329 |
|          | 5.658839 | 2.889773 |
| 7.437479 | 8.046764 | 7.063522 |
| 10.66666 | 10.1636  | 10.7707  |
| 9.97787  | 10.65426 | 11.5141  |
| 6.0755   | 6.020639 | 4.848249 |
| 9.444448 | 9.25116  | 9.096739 |
|          | 6.140976 |          |
| 9.628428 | 8.860247 | 9.611043 |
| 6.717299 | 7.975371 | 6.709089 |
| 4.428147 | 5.509849 | 6.497038 |
| 6.416583 | 7.161457 | 7.004051 |
| 11.79181 | 11.69766 | 11.47347 |
| 6.368467 | 5.513222 |          |
| 10.9282  | 11.16192 | 9.755035 |
| 10.58695 | 10.16284 | 10.41261 |
| 6.805576 | 6.547001 | 7.914033 |
| 10.07947 | 10.10933 | 10.30487 |
| 8.962574 | 8.702558 | 8.098782 |
| 5.558216 | 5.398861 |          |
| 9.495079 | 9.924138 | 8.58833  |
| 9.458297 | 9.54678  | 8.394994 |

|          |          |          |
|----------|----------|----------|
| 7.621845 | 7.151199 | 7.512229 |
| 7.454997 | 7.087827 | 6.715286 |
| 5.93698  | 6.538701 | 6.550164 |
| 10.63034 | 10.66862 | 10.20985 |
| 7.489849 | 7.286534 | 7.326436 |
| 8.78879  | 8.929468 | 8.693597 |
| 9.647079 | 8.903432 | 8.931257 |
| 8.577291 | 8.234189 | 8.398993 |
| 7.512103 | 6.988289 | 8.187456 |
| 6.83473  | 6.762071 | 7.196181 |
|          |          | 5.737268 |
| 9.791623 | 9.116526 | 9.757633 |
| 5.338038 | 4.853554 | 5.514585 |
| 12.04039 | 11.71138 | 12.1084  |
| 6.705657 | 6.261004 | 6.831933 |
| 10.90534 | 11.33704 | 10.81093 |
| 10.52244 | 10.56701 | 10.67824 |
| 7.339612 | 7.167874 | 6.9957   |
| 5.000466 | 1.239328 | 5.576957 |
| 6.713813 | 6.451901 | 6.165447 |
|          | 6.83418  | 7.481421 |
|          | 5.350946 |          |
| 9.317842 | 8.908259 | 9.044913 |
| 7.240856 |          | 8.523723 |
| 8.348155 | 6.902172 | 8.164795 |
| 10.13194 | 9.668284 | 10.13911 |
| 6.304894 | 7.308049 | 6.963022 |
| 9.041307 | 9.417584 | 9.295192 |
| 5.639125 | 5.339076 | 6.817896 |
|          | 6.773777 | 6.941858 |
| 9.392563 | 10.20594 | 9.295345 |
| 8.51154  | 9.257099 | 8.390082 |
| 10.01515 | 10.50416 | 9.924838 |
| 7.484701 | 8.075858 | 8.344862 |
| 8.908432 | 9.274242 | 7.665344 |
| 10.46009 | 10.43779 | 10.61954 |
| 6.715678 | 5.676319 | 6.238136 |
| 7.975503 | 8.242684 | 8.532985 |
| 4.29129  |          |          |
| 4.79917  | 6.18982  | 5.894525 |

|          |          |          |
|----------|----------|----------|
| 11.74551 | 11.48502 | 11.92361 |
| 8.581084 | 8.69963  | 8.638494 |
| 7.874726 | 9.299476 | 7.571432 |
| 6.610147 | 6.612895 | 7.225577 |
| 7.72095  | 8.366142 | 10.36501 |
| 5.540405 |          | 5.67573  |
| 8.829519 | 8.548086 | 8.792241 |
| 9.344094 | 8.906896 | 9.048389 |
| 11.82549 | 11.25651 | 11.81448 |
| 9.41751  | 9.06741  | 8.706226 |
| 10.80382 | 10.93532 | 10.47769 |
| 6.376947 |          |          |
| 7.790668 | 7.921716 | 7.326338 |
| 6.003649 | 6.118437 | 6.104904 |
| 9.919186 | 10.27065 | 10.39457 |
| 8.418552 | 8.721017 | 8.91671  |
| 6.75295  | 6.640176 |          |
| 6.754523 | 6.954975 | 7.717166 |
| 8.948102 | 8.703032 | 8.342523 |
| 6.436873 | 6.410797 | 6.865889 |
| 8.515352 | 7.669549 | 8.470651 |
| 8.021802 | 7.787973 | 7.683533 |
| 9.297541 | 9.374391 | 9.117292 |
| 5.441187 |          |          |
| 6.29527  | 6.31561  | 7.492603 |
| 7.03205  | 8.063122 | 7.625511 |
| 6.83157  | 7.064431 | 7.891941 |
| 7.434538 | 8.084242 | 7.428233 |
| 12.46439 | 12.26975 | 12.0876  |
| 12.84739 | 12.63839 | 12.82788 |
| 10.43857 | 9.894756 | 10.45568 |
| 6.289536 | 5.424521 |          |
| 6.886477 | 7.105739 | 7.194529 |
| 6.31852  | 5.814856 | 5.483434 |
|          | 6.844506 | 7.074947 |
| 6.271012 | 6.48553  | 6.486388 |
| 5.408732 | 6.171656 | 6.088247 |
| 11.50203 | 11.27543 | 11.05255 |
| 7.440363 | 7.488353 | 6.455595 |
| 6.427133 | 6.931651 | 5.442797 |

|          |          |          |
|----------|----------|----------|
| 6.927769 | 7.028402 | 6.910773 |
| 6.512516 | 7.240108 | 6.838904 |
| 7.506572 | 6.996575 | 7.110891 |
| 10.13546 | 10.25463 | 10.22042 |
| 8.450983 | 8.014439 | 8.374149 |
| 8.275459 | 9.015714 | 8.51166  |
| 8.306661 | 8.616376 | 7.952609 |
| 10.69723 | 9.674794 | 10.90445 |
| 9.018965 | 9.970505 | 7.822595 |
| 8.402175 | 9.085475 | 8.730098 |
| 6.33776  | 5.425463 | 6.405254 |
| 8.213733 | 7.976771 | 7.47807  |
| 10.85812 | 11.08554 | 11.09495 |
| 10.2405  | 11.27758 | 10.58228 |
| 6.481547 | 7.161488 |          |
| 8.876868 | 8.627035 | 9.349678 |
| 8.884771 | 9.23494  | 9.553244 |
| 6.149175 | 6.799384 |          |
| 4.787501 | 6.138532 |          |
| 9.278439 | 9.04797  | 8.974356 |
| 5.443535 | 5.817884 | 1.173095 |
| 8.879709 | 9.111168 | 9.196222 |
| 5.881352 | 6.890715 | 6.792391 |
| 4.808584 | 4.686593 |          |
| 5.514917 | 5.600298 | 5.541439 |
| 9.90723  | 10.6688  | 9.889724 |
| 8.349146 | 7.864576 | 8.444277 |
| 7.124071 | 7.671639 | 7.355108 |
| 9.795256 | 10.15083 | 8.89382  |
| 7.80457  | 8.100569 | 6.269808 |
| 7.340631 | 7.694542 | 6.903404 |
| 8.104571 | 8.001414 | 8.170609 |
| 11.69327 | 11.80229 | 11.09446 |
| 8.058654 | 8.375064 | 8.223929 |
| 7.98031  | 7.490682 | 8.020545 |
| 5.189749 |          |          |
| 9.169068 | 9.498127 | 9.308642 |
| 6.959138 | 6.934275 | 4.869903 |
| 8.358277 | 7.819922 | 7.890832 |
| 6.032034 | 6.670671 | 6.931353 |

|          |          |          |
|----------|----------|----------|
| 8.356542 | 8.443831 |          |
| 6.970307 | 6.702703 |          |
| 3.315227 | 5.747414 |          |
| 10.38116 | 10.28833 | 10.31041 |
| 11.70901 | 11.82539 | 11.72106 |
| 7.246229 | 7.814599 | 7.388056 |
| 5.183599 | 6.764382 | 6.652766 |
| 5.707686 | 6.405854 | 5.790988 |
| 6.800737 | 6.678445 | 6.050634 |
| 5.255558 | 5.373864 | 6.514706 |
| 8.193308 | 8.503854 | 8.169251 |
| 9.97931  | 10.40848 | 9.993508 |
| 10.77685 | 10.60401 | 10.80861 |
| 10.41978 |          |          |
| 8.872982 | 9.462729 | 8.326502 |
| 7.991657 | 8.016418 | 8.067106 |
| 10.34138 | 10.34601 | 9.860792 |
| 9.056071 | 8.936696 | 8.631225 |
| 5.510256 |          |          |
| 9.644865 | 9.321097 | 9.121879 |
| 5.677866 | 6.861466 | 5.840702 |
|          | 6.310628 |          |
| 10.17645 | 10.41655 | 10.01195 |
| 7.577815 | 8.126936 |          |
| 12.45341 | 12.2074  | 11.87348 |
| 7.215682 | 7.514764 | 7.107556 |
| 9.32235  | 9.510798 | 9.505333 |
| 9.004875 | 8.958039 | 8.889186 |
| 7.68592  | 8.597971 | 7.483025 |
| 4.812631 | 5.814838 | 5.991644 |
| 7.508104 | 7.740026 | 7.452529 |
| 10.93493 | 11.69561 | 10.70367 |
| 10.18013 | 9.806168 | 10.31623 |
| 9.230726 | 8.958097 | 9.099166 |
|          |          | 2.719945 |
| 9.021441 | 9.368822 | 8.769714 |
| 8.624705 | 8.01794  | 8.460601 |
| 10.19511 | 10.75953 | 10.53311 |
| 6.226241 | 6.713159 | 6.708168 |
| 5.963707 | 6.060661 |          |

|          |          |          |
|----------|----------|----------|
| 4.791559 |          |          |
| 8.509716 | 8.83594  | 8.706544 |
| 9.1815   | 9.56211  | 9.768699 |
| 7.878412 | 8.350211 | 8.38043  |
| 9.505238 | 9.12066  | 9.220126 |
| 6.337399 |          | 3.445647 |
| 8.203607 | 7.596406 | 7.715248 |
| 8.554657 | 8.79823  | 8.67646  |
|          | 7.011103 |          |
| 7.174428 | 7.134501 | 7.816342 |
| 7.822123 | 8.591293 | 8.516729 |
| 10.87221 | 10.62142 | 11.12039 |
| 7.941468 | 7.932001 | 7.98128  |
| 6.017709 |          |          |
|          | 6.750807 |          |
| 7.215369 | 7.535888 | 7.470348 |
|          |          | 3.028736 |
| 7.255041 | 6.795645 | 6.871772 |
| 7.702571 | 7.787101 | 8.224362 |
| 10.62332 | 10.39228 | 10.30881 |
| 10.0954  | 10.04563 | 10.05106 |
| 7.016964 | 6.397813 | 7.250878 |
| 8.011691 | 8.087608 |          |
| 6.553472 | 6.632315 | 6.610241 |
| 11.02867 | 10.6474  | 11.26053 |
| 2.602612 |          |          |
| 7.887402 | 7.647403 | 8.603644 |
| 5.94516  | 7.850919 | 6.285242 |
| 3.569317 | 5.653977 | 5.780781 |
| 6.478575 |          |          |
| 11.23103 | 11.24555 | 11.25867 |
| 8.795123 | 8.574283 | 8.606429 |
| 8.048209 | 8.458413 | 8.126635 |
|          |          | 4.559803 |
| 6.457835 | 7.655284 | 6.805689 |
| 7.903849 | 8.007174 | 8.012503 |
| 8.42038  | 6.71641  | 6.834395 |
| 9.044831 | 9.481984 | 7.641683 |
| 4.287039 | 5.519862 | 6.511971 |
|          | 6.331171 | 5.399459 |

|          |          |          |
|----------|----------|----------|
| 7.566097 | 7.498099 |          |
| 7.865845 | 7.965482 | 7.836477 |
| 6.994587 | 8.226817 |          |
| 7.69987  | 8.818076 | 8.937363 |
| 5.771314 | 6.285458 | 6.134815 |
| 5.20421  | 7.039918 | 6.695428 |
| 9.736098 | 9.99614  | 10.14304 |
| 6.2933   | 6.019697 | 6.164687 |
| 10.46882 | 10.56167 | 10.77713 |
| 6.641321 | 6.775759 | 6.938065 |
| 9.501945 |          | 9.89475  |
| 10.89518 | 10.77972 | 10.86007 |
| 6.110202 | 6.610427 | 6.895349 |
| 5.232039 |          | 6.232911 |
| 10.77405 | 9.277701 | 10.81315 |
| 5.756832 | 7.046712 | 6.348903 |
| 4.941552 |          |          |
| 10.06024 | 9.229795 | 9.708749 |
| 6.804981 | 6.403938 | 6.439422 |
| 13.77801 | 13.8821  | 14.11569 |
| 11.00242 | 10.40329 | 11.20105 |
| 10.12439 | 10.47844 | 10.5191  |
| 9.505529 | 8.935613 | 9.418239 |
| 7.18514  | 5.957743 | 6.781614 |
| 9.56773  | 10.32198 | 10.12258 |
| 4.51714  | 6.134078 | 6.249804 |
| 8.888084 | 8.805616 | 8.677322 |
| 6.896213 | 6.558487 | 6.540321 |
| 8.281764 | 7.790543 | 8.377998 |
| 7.400271 | 7.642443 | 7.461741 |
| 8.005174 | 8.496837 | 9.164136 |
| 4.333505 | 5.963596 |          |
| 7.808264 | 8.792132 | 8.318901 |
| 8.215799 | 8.543683 | 8.959339 |
| 9.290905 | 9.63699  | 9.190934 |
| 11.14843 | 11.318   | 10.66242 |
| 7.816317 | 8.768909 | 7.613277 |
| 9.887054 | 9.840875 | 10.68347 |
| 7.304825 | 7.388523 | 7.425229 |
| 7.705579 | 7.475278 | 7.81195  |

|          |          |          |
|----------|----------|----------|
| 3.969204 | 5.673451 | 6.446405 |
| 7.618824 | 7.924348 | 7.497432 |
| 6.259591 | 6.549795 |          |
| 6.28446  | 6.743808 | 7.213812 |
| 8.447699 | 7.616607 | 9.129694 |
| 4.45365  | 5.525569 |          |
| 4.807867 |          | 4.456085 |
| 4.896189 | 2.368449 | 5.743577 |
| 8.690711 | 9.854334 | 8.300061 |
| 6.434259 | 8.027526 | 6.597208 |
| 10.03918 | 10.49167 | 10.44519 |
| 8.476576 | 8.858196 | 8.753057 |
| 10.73678 | 10.59937 | 9.945679 |
| 9.086821 | 8.592896 | 8.163303 |
| 11.5141  | 11.60956 | 12.64464 |
| 5.572007 | 7.320304 | 7.551643 |
| 10.43361 | 9.685354 | 10.15852 |
| 6.989816 | 6.958408 | 6.963897 |
| 5.415497 | 5.933776 | 5.923393 |
| 8.612201 | 8.148503 | 9.277081 |
| 7.695198 | 7.659321 | 8.076541 |
| 7.410501 | 7.039965 | 7.75033  |
| 9.042523 | 9.070541 | 9.617522 |
| 4.625303 | 5.568453 | 5.206653 |
| 7.315101 | 6.825235 | 6.436392 |
|          | 1.731451 | 7.346532 |
| 7.989593 | 8.575188 | 8.979979 |
| 11.35993 | 12.09581 | 10.90039 |
| 12.73614 | 13.00037 | 12.8584  |
| 10.84813 | 10.25432 | 10.73709 |
| 4.802903 | 6.77253  |          |
|          | 6.157662 |          |
|          | 6.793329 |          |
| 7.261172 | 7.653808 | 7.165753 |
| 7.910552 | 7.195322 | 8.011201 |
| 10.5303  | 6.183046 | 10.44947 |
| 8.051341 | 7.476146 | 7.267309 |
| 4.689277 |          |          |



|          |          |          |
|----------|----------|----------|
| 11.37528 | 11.62417 | 11.12768 |
| 7.551128 | 7.700468 | 7.867918 |
| 6.032383 | 5.703148 |          |
| 8.144889 | 8.430023 | 8.054298 |
| 5.914633 |          | 5.821697 |
| 8.430027 | 9.326778 | 7.32158  |
| 7.525632 | 6.690685 | 8.002401 |
| 10.96504 | 11.38319 | 10.02896 |
| 6.304812 |          |          |
|          |          | 6.443591 |
| 7.708898 | 6.760566 | 7.704583 |
| 8.41232  | 7.74876  | 8.200831 |
| 5.316681 | 5.682198 | 6.104274 |
| 9.923104 | 10.08582 | 10.25538 |
| 8.960998 | 8.730443 | 8.672623 |
| 10.09309 | 9.922824 | 9.809284 |
| 6.829186 | 6.379099 | 7.744897 |
|          |          | 6.596394 |
| 5.941506 |          |          |
| 7.273166 | 7.207889 | 7.18075  |
|          | 5.845926 | 5.21215  |
| 5.337024 | 6.423049 | 6.396802 |
| 9.411679 | 9.429282 | 7.565982 |
| 12.28374 | 12.01146 | 12.33204 |
| 8.26594  | 9.793049 | 9.406281 |
| 12.04585 | 12.46412 | 10.96885 |
| 12.0167  | 11.82208 | 12.09257 |
| 8.263467 | 8.445131 | 8.14245  |
| 11.24552 | 11.33433 | 11.86682 |
| 12.20922 | 12.09192 | 12.48564 |
| 8.410152 | 8.230314 | 8.830064 |
| 7.932819 | 7.132881 | 7.551799 |
| 12.23566 | 11.92227 | 12.07563 |
| 5.342349 |          |          |
| 5.719632 | 5.601709 | 5.812857 |
| 6.548175 |          |          |
| 11.61115 | 10.17001 | 10.98664 |
| 8.092716 | 8.825871 | 7.247643 |
| 10.99639 | 11.29394 | 10.44387 |
| 11.92009 | 12.45237 | 11.4597  |

|          |          |          |
|----------|----------|----------|
| 13.91491 | 13.84007 | 14.41452 |
| 11.18391 | 10.52182 | 10.98158 |
| 2.588424 | 5.919772 | 3.494188 |
| 7.858236 | 6.879384 |          |
| 5.202728 | 3.496672 |          |
| 4.954215 | 5.972135 | 6.094975 |
| 7.342606 | 7.302427 | 7.439017 |
| 7.996668 | 8.207417 | 7.446713 |
| 11.35393 | 11.5567  | 11.63058 |
| 7.969848 | 7.791004 | 7.269239 |
| 12.68278 | 13.38876 | 12.87099 |
| 4.166099 | 5.802396 | 5.989267 |
| 8.916024 | 9.630216 | 8.256171 |
| 4.53651  | 4.06983  |          |
| 10.69931 | 10.41937 | 10.59043 |
| 6.07837  | 6.220215 | 6.828476 |
| 6.010404 | 6.58134  | 7.479407 |
| 7.350828 | 7.273184 | 7.061222 |
|          |          | 7.807657 |
|          | 5.294245 | 4.922955 |
| 5.147579 | 6.294587 | 6.107284 |
| 10.36519 | 10.1467  | 10.64016 |
| 8.794412 | 9.246221 | 8.457024 |
| 11.28352 | 11.20071 | 10.78254 |
| 7.570717 | 7.370005 | 7.631834 |
| 6.19494  | 6.716861 | 7.774429 |
| 8.911797 | 8.906981 | 8.570858 |
| 6.24713  | 5.959449 | 4.632925 |
| 10.69492 | 9.984544 | 10.59404 |
| 7.196158 | 7.333747 | 7.170771 |
| 12.33134 | 11.9284  | 12.55128 |
| 6.019781 | 6.138166 | 7.413021 |
| 12.22396 | 11.79607 | 11.98554 |
| 10.02969 | 11.98482 | 7.795531 |
| 11.70801 | 12.47644 | 11.68134 |
| 6.178628 | 5.638351 |          |
|          |          | 7.286742 |
| 8.675731 | 9.357658 | 8.204502 |
| 10.69446 | 10.65914 | 11.20031 |
| 7.073784 | 7.87353  | 6.996931 |

|          |          |          |
|----------|----------|----------|
| 15.52638 | 15.35276 | 15.95767 |
| 6.138481 | 6.798212 | 7.229209 |
| 9.057662 | 8.510074 | 8.546395 |
| 7.494304 | 8.587197 | 8.409006 |
| 8.502935 | 8.102785 | 8.685599 |
| 7.646214 | 7.23212  | 7.307015 |
| 5.470028 | 6.109797 | 6.05844  |
| 11.67034 | 10.66619 | 11.02763 |
| 7.494538 | 7.421831 | 7.634858 |
| 10.54789 | 10.39903 | 10.87788 |
| 11.29822 | 11.09083 | 10.97911 |
| 4.48691  | 6.160956 |          |
| 6.643443 | 6.983477 | 6.823504 |
| 9.148402 | 8.98488  | 9.14183  |
| 9.51444  | 9.423519 | 10.13322 |
| 5.574317 | 5.970414 | 6.108538 |
| 11.08405 | 11.1079  | 11.13667 |
| 9.565206 | 8.593873 | 8.658903 |
| 9.857965 | 10.00817 | 10.37991 |
| 8.018406 | 8.252584 | 8.380338 |
| 9.85559  | 8.968995 | 10.23359 |
| 7.81251  | 8.498825 | 7.884852 |
| 6.914476 | 7.257309 | 7.909844 |
| 7.049843 | 7.24788  | 7.739368 |
| 6.480343 | 7.151702 | 3.529298 |
| 13.85165 | 13.54077 | 13.17149 |
| 11.62416 | 11.70038 | 11.64525 |
| 1.75444  |          |          |
| 10.00729 | 9.888356 | 10.46929 |
| 6.82014  | 7.019992 |          |
| 10.66134 | 9.982685 | 10.12731 |
| 5.72683  | 4.598136 | 6.143882 |
|          |          | 5.832386 |
| 8.487581 | 8.699801 | 8.440568 |
| 7.496894 | 6.89382  | 7.593198 |
| 6.070302 | 7.431738 | 6.943572 |
| 6.430469 | 8.192346 | 6.798535 |
| 11.69062 | 12.81148 | 11.43662 |
| 6.790311 | 6.729198 | 7.463187 |

|          |          |          |
|----------|----------|----------|
|          | 5.888279 | 6.893524 |
| 7.258091 | 6.985531 | 7.420336 |
| 5.773273 | 5.811289 | 6.427883 |
| 6.116112 |          | 6.611772 |
| 7.501164 | 7.265647 | 7.368778 |
| 6.224012 |          |          |
| 9.347401 | 9.935892 | 8.64123  |
| 10.40186 | 9.563416 | 11.12411 |
| 11.02206 | 11.26086 | 11.72815 |
| 6.813952 | 5.979649 | 5.847419 |
| 9.138586 | 9.728992 | 8.974904 |
| 9.229398 | 7.944936 | 11.01904 |
| 7.577587 | 7.312055 | 8.742119 |
| 7.662683 | 7.786059 | 8.151732 |
| 13.60523 | 13.31023 | 14.02635 |
| 6.433448 | 7.022787 | 6.160243 |
| 7.190719 | 7.090217 | 6.876073 |
| 8.706792 | 9.524664 | 7.587396 |
| 5.314852 | 6.208888 | 7.919525 |
| 11.48014 | 11.22826 | 12.06424 |
| 7.294048 | 7.083549 | 7.106922 |
| 8.15978  | 8.350153 | 8.879659 |
|          |          |          |
| 11.92931 | 12.30593 | 12.28524 |
| 12.56453 | 12.79311 | 12.13799 |
| 9.854348 | 9.669018 | 10.09814 |
| 8.4725   | 8.663149 | 8.891704 |
| 8.466548 | 8.981016 | 8.107182 |
| 7.569214 | 8.847749 | 7.302488 |
| 10.09036 | 10.14394 | 10.41401 |
| 7.36852  | 7.414578 | 7.343815 |
| 8.069519 | 7.592289 | 7.275813 |
| 10.44718 | 10.21142 | 10.6118  |
| 9.172851 | 9.817591 | 9.871599 |
| 11.72186 | 11.5619  | 11.62323 |
| 9.158598 | 9.093714 | 9.100095 |
| 8.632346 | 9.02006  | 9.023755 |
| 8.451288 | 8.960594 | 7.271923 |
| 8.239739 | 7.66357  | 7.2843   |
| 9.964891 | 9.832008 | 9.023911 |

|          |          |          |
|----------|----------|----------|
| 4.754165 | 6.154143 | 6.83115  |
| 9.003438 | 8.941774 | 8.528279 |
| 5.178868 | 5.930617 | 5.324189 |
| 9.247853 | 8.918433 | 9.58314  |
| 11.68269 | 11.40032 | 11.652   |
| 4.982363 |          | 6.034778 |
| 6.481147 | 7.594393 | 7.574674 |
| 5.78448  | 5.387979 | 4.698309 |
| 6.379427 | 5.81616  | 5.254499 |
|          |          | 4.965407 |
| 6.448937 |          | 7.395789 |
| 8.667776 | 9.2628   | 9.042748 |
| 6.665898 | 7.151211 | 7.093046 |
| 5.807618 |          | 5.745947 |
| 7.185428 |          |          |
|          | 6.921517 |          |
| 8.087517 | 9.145585 | 8.755869 |
| 6.824485 | 7.847081 | 7.585537 |
| 11.37658 | 11.35156 | 11.75142 |
| 8.401756 | 10.80292 | 8.972376 |
| 10.31624 | 9.897024 | 10.76151 |
| 5.669806 |          | 6.281816 |
| 9.957287 | 9.39443  | 9.67549  |
| 5.296669 | 5.477295 | 5.125639 |
| 7.437331 | 8.508344 | 8.199219 |
| 7.753748 | 6.892541 | 7.428702 |
| 8.422076 | 8.470493 | 8.917853 |
| 10.41878 | 10.63565 | 10.78819 |
| 11.35924 | 11.54909 | 10.91858 |
| 8.811318 | 8.579159 | 8.31573  |
| 4.28807  | 5.843948 | 4.36419  |
| 8.778787 | 9.7953   | 8.153554 |
| 10.224   | 11.24982 | 10.62054 |
| 13.01718 | 12.99606 | 12.99053 |
| 3.279722 |          |          |
|          | 3.26973  |          |
| 4.809338 | 5.959015 |          |
|          | 6.801952 |          |
| 6.8851   | 7.053639 |          |
|          | 7.051694 | 6.718781 |

|          |          |          |
|----------|----------|----------|
|          |          | 5.141776 |
| 12.05681 | 11.41737 | 11.70195 |
| 7.511464 | 7.718247 | 7.931593 |
| 7.965457 | 8.205259 | 7.795202 |
| 6.506424 | 5.800261 | 7.345792 |
| 7.517107 | 7.436246 |          |
| 10.11808 | 9.381763 | 9.947434 |
| 6.862289 | 7.321775 | 7.926557 |
| 7.136989 | 7.524752 | 7.315238 |
| 8.442563 | 8.675826 | 8.461617 |
| 8.689269 | 8.972415 | 8.726054 |
| 11.13718 | 11.38155 | 11.17912 |
| 9.090578 | 9.143208 | 9.608782 |
| 10.93924 | 10.81686 | 10.86057 |
| 6.275281 |          | 6.284061 |
| 10.40812 | 7.095498 | 10.27259 |
| 5.39112  | 5.217513 | 4.90216  |
|          |          |          |
| 12.24166 | 9.551728 | 12.21458 |
| 8.448812 | 8.816315 | 7.983911 |
| 10.08531 | 10.10879 | 10.01167 |
| 10.88483 | 10.83103 | 10.85042 |
| 9.94098  | 9.721928 | 10.00214 |
| 8.029801 | 7.912296 | 8.333423 |
| 7.457334 | 7.865089 |          |
| 8.214923 | 7.737423 | 8.544596 |
| 10.26169 | 10.43462 | 9.724703 |
| 8.574388 | 8.533647 | 8.982064 |
| 6.96459  | 6.764486 | 6.743219 |
| 6.052441 | 6.209918 | 6.72006  |
| 10.26406 | 10.50245 | 10.26055 |
| 11.87729 | 11.57789 | 11.62429 |
| 7.515051 | 7.269123 | 7.753394 |
| 6.997654 | 6.637806 | 6.61213  |
| 10.85952 | 10.61311 | 11.46601 |
| 7.972892 | 7.762431 | 7.585048 |
| 7.989352 | 7.307069 | 6.951652 |
| 6.447637 | 6.553017 | 6.933302 |
| 10.18118 | 9.58577  | 10.30072 |
| 7.624687 | 7.936541 | 8.152204 |

|          |          |          |
|----------|----------|----------|
| 12.09988 | 11.57169 | 12.21344 |
| 6.942777 | 7.511547 | 6.413918 |
| 6.04968  | 5.701795 | 5.522238 |
| 13.54752 | 13.41341 | 13.3181  |
| 6.078461 | 7.294329 | 7.154139 |
| 10.7183  | 10.609   | 10.89121 |
| 6.152253 | 7.051433 |          |
| 10.06389 | 10.17771 | 9.552835 |
| 4.183096 | 6.874698 | 6.790403 |
| 12.08921 | 12.16125 | 12.01809 |
| 5.902763 | 7.584677 |          |
| 7.187101 | 7.562624 | 6.488747 |
| 12.62303 | 13.06755 | 12.56665 |
| 10.3999  | 10.69267 | 10.13148 |
| 8.239117 | 8.662781 |          |
| 6.769736 | 6.939723 | 6.991457 |
| 8.399033 | 9.952044 | 8.993018 |
| 5.731388 | 4.433484 | 5.377751 |
| 9.428082 | 9.792907 | 8.99498  |
| 9.208954 | 8.843995 | 9.399543 |
| 12.81708 | 12.9676  | 12.5009  |
| 5.16692  | 4.533068 |          |
| 13.10897 | 13.87868 | 12.46226 |
| 7.88231  | 6.704155 | 8.296233 |
| 11.4011  | 11.42647 | 10.75112 |
| 5.450306 | 4.733922 | 6.421577 |
| 12.105   | 12.31748 | 11.87358 |
| 7.983065 | 7.664093 | 7.445703 |
| 7.177901 | 6.600295 | 7.329537 |
| 8.449062 | 7.883473 | 8.105442 |
| 11.41733 | 11.19523 | 11.41697 |
| 3.680938 |          |          |
| 9.052419 | 10.12433 | 9.286583 |
| 6.748602 | 6.27463  | 7.108829 |
| 7.571954 | 6.98486  | 7.31314  |
| 13.34764 | 13.52281 | 13.47751 |
| 6.632126 |          | 6.541578 |
| 12.08948 | 11.60048 | 11.93127 |
| 7.677322 | 8.213403 | 7.955289 |
| 7.325824 | 6.674859 | 7.717812 |

|          |          |          |
|----------|----------|----------|
| 10.65709 | 11.74601 | 9.064158 |
| 10.01911 | 10.29377 | 9.855124 |
| 7.965884 | 8.280378 | 7.462491 |
|          |          | 7.235475 |
| 6.045503 | 4.788485 | 6.811932 |
| 6.371964 | 6.047806 | 6.963364 |
| 8.677513 | 8.627771 | 7.84838  |
| 6.412723 |          | 6.376666 |
|          | 3.309717 |          |
| 6.366916 | 6.024273 | 6.171908 |
| 7.304311 | 8.002576 | 6.028738 |
| 8.71107  | 8.520495 | 8.599561 |
| 5.205407 | 8.413775 | 7.71946  |
| 6.357274 | 7.166471 | 7.41331  |
| 6.486714 |          |          |
|          |          | 3.013658 |
| 3.441764 | 5.999472 | 6.185407 |
|          | 4.350995 | 3.642833 |
|          | 6.689726 |          |
| 6.426245 | 6.549286 |          |
| 7.603347 | 7.948965 | 6.968172 |
| 13.67302 | 13.4476  | 13.4497  |
| 6.587505 | 6.757934 | 7.048891 |
| 5.901373 |          |          |
| 7.489503 | 7.058489 | 8.81799  |
| 1.240441 |          |          |
| 8.85848  | 7.888216 | 9.110808 |
| 7.385247 | 8.274212 | 7.213525 |
| 3.821329 | 6.28964  |          |
|          |          | 7.419425 |
| 12.1005  | 12.55946 | 11.85581 |
| 7.039037 | 6.964292 | 7.256888 |
| 5.903535 | 6.991515 | 6.378906 |
| 9.744645 | 9.512482 | 9.492491 |
| 11.33148 | 11.18438 | 11.2805  |
| 7.711247 | 8.810878 | 8.924929 |
| 9.66886  | 9.888063 | 9.737495 |
| 5.886819 |          | 5.761641 |



|          |          |          |
|----------|----------|----------|
| 5.48791  | 5.296691 | 5.244928 |
|          | 4.154545 |          |
| 6.855217 | 7.098158 | 5.911356 |
| 8.955112 | 8.401816 | 8.84323  |
| 7.568702 | 7.469204 | 7.711634 |
| 7.910449 | 8.226405 | 8.237149 |
|          |          | 2.626593 |
| 9.554148 | 9.487313 | 9.372032 |
| 5.66529  |          | 1.998782 |
| 7.032164 | 6.934382 | 7.120895 |
|          | 3.482899 |          |
| 5.885471 | 7.217639 | 7.208206 |
| 6.40708  | 6.887107 | 6.09096  |
| 5.770233 |          | 6.257201 |
| 5.647898 | 6.372884 | 5.879993 |
|          |          | 5.086854 |
| 8.579314 | 8.085549 | 9.207991 |
| 7.177845 | 7.533973 | 6.322716 |
| 12.68808 | 12.58903 | 12.38987 |
| 5.247052 |          | 4.805474 |
|          |          | 5.542731 |
| 6.761102 | 6.456862 | 6.678896 |
|          |          |          |
| 9.591116 | 9.240339 | 9.788079 |
| 8.698443 | 8.569521 | 8.66863  |
| 5.973612 | 5.54988  | 5.510566 |
|          | 6.810636 | 6.977841 |
| 8.25948  | 8.835844 | 8.634442 |
| 5.243611 |          |          |
|          | 6.616402 |          |
| 5.847968 | 6.907828 |          |
| 10.07915 | 10.18631 | 10.16991 |
| 6.892564 | 7.969991 | 6.789813 |
| 2.653832 |          |          |
| 6.442418 | 7.240306 | 6.631346 |
| 8.127066 | 7.99559  | 8.442616 |
| 9.513735 | 5.440525 | 8.895846 |
| 10.62088 | 10.84539 | 9.971594 |
| 12.66697 | 13.4432  | 13.16439 |
| 8.375568 | 8.655582 | 8.48416  |

|          |          |          |
|----------|----------|----------|
| 6.956441 | 7.760033 | 7.545242 |
| 7.341116 | 7.716654 | 8.436247 |
| 6.082759 | 6.57888  |          |
| 8.12668  | 8.032474 | 8.408335 |
|          |          | 4.602832 |
| 5.606256 |          |          |
| 9.436977 | 9.820077 | 9.805257 |
| 6.104921 | 5.979747 |          |
| 10.03672 | 9.877893 | 9.894469 |
| 8.620196 | 8.269038 | 9.008291 |
| 9.920365 | 9.861926 | 10.2618  |
| 5.843741 | 6.113969 |          |
| 9.189494 | 9.704713 | 9.688097 |
| 6.040944 | 4.918787 | 6.06018  |
|          | 5.807796 |          |
| 7.96499  | 8.381698 | 8.031683 |
| 6.901231 |          |          |
| 8.926842 | 8.349072 | 9.160786 |
| 8.689396 | 9.180534 | 8.335387 |
| 5.34106  | 5.416479 |          |
| 10.9936  | 10.96549 | 10.67831 |
| 3.787589 |          |          |
| 6.092077 | 6.23951  |          |
| 6.671465 | 7.707481 | 7.657489 |
| 10.94223 | 10.46232 | 11.2045  |
| 9.629109 | 9.238537 | 9.759377 |
| 6.767445 | 6.699998 | 6.190134 |
| 11.68128 | 11.46344 | 11.41544 |
| 6.114751 | 7.65893  | 7.087304 |
|          | 6.141946 | 4.803247 |
| 7.256059 | 6.581378 | 7.930285 |
|          |          | 6.090815 |
| 7.214109 | 7.575396 | 7.597002 |
| 8.701633 | 9.641547 |          |
| 9.085561 | 9.366562 | 8.754474 |
| 9.456473 | 9.121292 | 9.57422  |
| 9.810283 | 9.777215 | 9.610903 |
| 6.39937  | 6.979048 | 7.331143 |
| 11.30867 | 10.87648 | 11.67977 |
| 14.02287 | 14.70713 | 14.73404 |

|          |          |          |
|----------|----------|----------|
| 6.134764 | 6.472718 |          |
| 7.183189 | 7.484276 |          |
| 9.34498  | 10.53205 | 9.06657  |
| 11.22442 | 11.68959 | 11.03886 |
| 7.984469 | 7.731532 | 7.785108 |
| 10.96653 | 11.15755 | 10.98042 |
| 11.79176 | 11.88851 | 11.8591  |
| 11.72762 | 11.63983 | 11.38887 |
| 9.491882 | 9.05683  | 8.969463 |
| 9.076158 | 9.001095 | 9.293243 |
| 4.899909 | 5.787615 | 6.134239 |
| 4.982122 | 7.1162   | 6.529801 |
| 6.384257 | 6.762395 |          |
| 8.673604 | 9.234229 | 7.62684  |
| 7.872233 | 7.623824 | 8.025698 |
| 8.053482 | 8.058819 | 8.069173 |
| 6.233184 | 6.835038 | 6.809099 |
| 8.752363 | 8.840828 | 8.364117 |
| 11.64137 | 11.6143  | 11.76759 |
| 6.95458  | 7.432282 | 7.004268 |
|          | 5.822823 | 5.71575  |
|          |          | 3.859991 |
| 7.809936 | 8.625967 | 7.509842 |
| 6.896378 | 7.035782 | 6.728495 |
| 6.397119 |          |          |
| 6.960595 | 8.089338 | 7.52815  |
| 6.186162 | 6.805418 | 6.097458 |
| 7.147171 | 7.738398 |          |
| 5.508853 | 7.754479 | 6.880027 |
| 6.207757 | 5.493502 | 6.938046 |
| 6.31098  | 5.362015 | 6.735364 |
| 5.612897 | 7.432209 | 5.533533 |
| 8.302465 | 8.866217 | 8.966865 |
| 9.15471  | 8.310906 | 9.372078 |
| 11.47498 | 12.42859 | 11.57023 |
| 5.386818 |          | 6.576198 |
| 6.977314 | 7.000051 | 7.403075 |
| 8.717392 | 8.365108 | 8.088213 |
| 7.350359 | 6.44086  | 6.597468 |
| 11.35265 | 10.85928 | 10.77268 |

|          |          |          |
|----------|----------|----------|
| 13.53071 | 13.5559  | 13.7442  |
| 11.17598 | 11.58029 | 11.30667 |
| 6.0386   | 7.105356 |          |
| 8.442257 | 8.47252  | 8.809669 |
| 5.014743 | 9.088668 | 5.784271 |
| 7.529385 | 8.660327 | 7.870045 |
| 8.982179 | 10.13439 | 10.47741 |
| 8.175612 | 7.785325 | 7.939912 |
| 7.980526 | 7.713771 | 8.651236 |
|          | 7.743902 |          |
| 10.89421 | 11.43617 | 11.12989 |
| 5.922007 | 5.694783 | 5.933736 |
| 6.253642 | 6.173997 | 6.568509 |
| 9.16812  | 9.602716 | 8.828686 |
| 10.33854 | 10.62739 | 10.59761 |
| 6.008044 | 6.140888 | 5.98322  |
| 6.870897 | 8.980242 |          |
| 9.9798   | 11.2548  | 9.74854  |
| 7.347078 | 7.480299 | 7.876792 |
| 8.433225 | 9.85631  | 8.506903 |
| 13.12672 | 12.97813 | 13.16909 |
| 10.01033 | 10.09291 | 9.663925 |
| 5.107842 | 0.860305 | 5.691541 |
| 5.224893 | 6.413888 | 5.336823 |
| 11.42511 | 10.59059 | 11.14871 |
| 11.67261 | 11.71432 | 12.11693 |
| 9.110037 | 8.785693 | 8.921051 |
| 7.918899 | 7.134823 | 7.005143 |
| 10.0706  | 10.08587 | 10.58669 |
| 5.961524 | 5.430286 | 5.957878 |
| 5.600723 | 5.903902 | 6.457081 |
| 11.64631 | 11.20234 | 11.57088 |
| 9.118703 | 9.843074 | 9.588434 |
| 7.453337 | 8.789952 | 8.141175 |
| 12.11194 | 11.64823 | 12.57465 |
|          | 5.247496 |          |
| 6.445875 | 7.801026 | 6.921852 |
| 7.322097 | 7.099969 | 7.0387   |
| 7.901955 | 8.742096 | 8.447747 |
| 5.364066 | 4.704147 | 6.329002 |

|          |          |          |
|----------|----------|----------|
| 10.87748 | 10.02226 | 10.15728 |
| 8.928382 | 8.552523 | 8.915787 |
| 6.061963 | 6.395356 | 7.009434 |
| 7.733348 | 1.8674   |          |
| 6.31162  |          | 7.377972 |
| 6.592847 | 6.922647 | 6.856563 |
| 8.170431 | 8.323683 | 8.115543 |
| 5.152209 | 0.314049 | 4.935864 |
| 12.41299 | 11.77124 | 12.22755 |
| 5.436455 | 6.069395 |          |
| 6.732066 | 6.75148  | 6.664521 |
| 10.55553 | 9.763754 | 10.29868 |
| 5.77214  | 6.507971 | 7.340012 |
| 13.55007 | 13.54119 | 13.46096 |
| 12.24388 | 12.56658 | 12.32217 |
| 5.528406 | 6.51388  | 5.240088 |
| 13.80621 | 13.76771 | 14.16478 |
|          | 5.684722 |          |
| 9.109333 | 9.831697 | 9.870773 |
| 5.868889 | 5.213321 | 5.44971  |
|          |          | 2.124996 |
| 8.971825 | 9.544872 | 7.810059 |
| 7.766803 | 7.453805 | 8.320535 |
| 8.655742 | 9.19206  | 7.990937 |
| 5.381045 | 5.621397 | 2.756593 |
| 9.796825 | 10.15231 | 9.163681 |
| 2.933986 |          |          |
|          | 3.603041 | 5.68696  |
| 6.125271 |          | 6.615084 |
|          | 4.619197 |          |
| 6.784112 | 7.345503 |          |
| 3.237284 |          |          |
|          |          | 7.184317 |
| 7.237017 | 8.023706 | 7.399823 |
| 3.981999 | 5.974456 | 3.931891 |
|          | 7.168907 |          |
| 8.679786 | 8.379303 | 7.651009 |
| 6.526427 | 7.069762 | 7.289787 |

|          |          |          |
|----------|----------|----------|
| 8.357225 | 8.700284 | 7.362769 |
| 7.30555  | 7.373152 | 6.770577 |
| 5.578378 |          |          |
| 6.566555 | 7.852433 | 7.166193 |
| 6.970279 | 8.002492 | 6.163436 |
|          | 5.894557 | 5.964971 |
| 8.548282 | 8.42465  | 8.782915 |
| 5.005961 |          |          |
| 8.009269 | 8.489629 | 8.171176 |
| 9.198605 | 9.965806 | 9.039796 |
| 5.413205 |          | 5.10271  |
| 10.30552 | 9.840414 | 10.4653  |
| 5.937743 | 5.322087 | 6.937357 |
| 5.488607 | 5.955273 | 6.080067 |
| 7.328989 | 7.916049 | 6.714558 |
| 6.536073 | 7.507163 | 7.643479 |
| 2.530734 |          |          |
| 6.320485 | 6.377296 |          |
| 6.702442 | 7.455488 | 6.770907 |
|          | 4.862974 |          |
| 5.811954 |          | 5.05528  |
| 5.371708 | 6.807375 |          |
| 13.54911 | 12.78855 | 12.09216 |
| 7.653286 | 7.150179 | 6.322643 |
| 6.66641  | 6.97671  |          |
| 9.892996 | 10.02645 | 9.120885 |
| 6.123916 |          | 6.447238 |
| 5.467221 | 6.032913 | 4.301581 |
| 6.944084 | 8.400938 | 5.474728 |
| 2.117794 |          |          |
| 4.656654 |          | 5.545349 |
|          | 5.410815 |          |
|          |          | 4.268339 |
|          | 1.046383 |          |
| 6.821949 |          |          |
| 9.034408 | 9.598933 | 8.805421 |

|          |          |          |
|----------|----------|----------|
|          | 5.745516 |          |
| 10.23027 | 9.987569 | 10.86936 |
| 6.431053 | 6.758809 | 6.380719 |
| 6.385592 | 5.499648 |          |
|          |          | 4.807675 |
| 6.61854  | 7.577842 | 6.578782 |
| 4.619453 |          |          |
|          |          | 6.036211 |
| 6.316735 | 6.889406 |          |
| 4.298409 |          |          |
|          |          | 5.200182 |
| 5.242546 |          | 7.511841 |
| 4.663344 |          |          |
| 1.663646 | 5.269009 |          |
| 5.731192 |          |          |
|          | 6.258174 |          |
| 8.183226 | 8.390272 | 7.288224 |
| 8.524842 | 7.865407 | 6.388862 |
| 4.222528 | 5.01543  |          |
|          | 5.328632 | 3.193209 |
| 9.844976 | 9.816284 | 9.153391 |
| 9.336229 | 9.170487 | 9.011395 |
| 6.561592 | 7.528544 | 7.2524   |
| 9.998219 | 10.1324  | 10.07161 |
| 5.292499 | 5.611311 | 4.007828 |
| 3.917239 |          |          |
| 5.973278 | 6.307977 | 6.130231 |
| 7.984079 | 8.703274 | 8.018436 |
|          |          | 4.204998 |
| 9.598529 | 9.147594 | 9.353442 |
| 5.166623 | 6.498887 |          |
|          | 4.983211 | 2.826221 |
| 5.834033 | 6.971466 | 5.84457  |

|          |          |          |
|----------|----------|----------|
| 2.174167 |          |          |
|          | 7.249053 | 6.207331 |
| 5.907409 |          |          |
|          |          | 4.216083 |
|          | 2.17739  |          |
| 5.020449 | 5.429356 |          |
| 6.763109 | 7.234628 |          |
|          | 6.480027 |          |
| 6.983392 | 6.309467 | 8.367247 |
| 6.639226 |          | 6.039433 |
| 6.945484 | 7.092695 | 5.922469 |
| 10.05881 | 10.16257 | 10.78875 |
| 5.527017 |          |          |
|          | 4.165131 | 5.952731 |
|          | 7.191037 | 6.74747  |
| 4.941409 | 5.497215 | 2.405347 |
| 5.026221 |          |          |
|          |          | 6.285298 |
| 6.677258 | 6.827611 | 6.680697 |
| 7.320121 | 8.467804 | 7.527761 |
| 5.956714 | 4.22516  | 5.79622  |
| 7.152914 | 7.623684 | 7.559826 |
| 2.207376 |          |          |
|          | 5.710125 |          |
| 5.56016  |          | 3.524808 |
|          | 4.927409 |          |
| 6.962049 | 7.479192 |          |
| 7.434375 | 7.061851 | 7.824612 |
|          | 5.776317 |          |
| 5.734795 | 6.161014 |          |
| 5.778851 | 7.015909 | 5.539207 |
| 5.333585 |          |          |
| 6.048062 | 6.997093 | 5.872304 |
| 8.758715 | 8.97915  | 8.883337 |
| 8.460494 | 10.0246  | 7.116585 |
| 7.001791 | 6.742479 |          |
| 5.728427 | 6.562124 | 6.117748 |
| 7.732671 | 7.700426 | 8.032621 |



|          |          |          |
|----------|----------|----------|
| 9.23887  | 9.751858 | 9.145031 |
| 7.922691 | 7.632386 | 7.625479 |
|          | 6.061513 |          |
| 5.532974 | 6.678833 | 6.692232 |
|          | 1.482576 |          |
| 10.25313 | 10.76712 | 9.11165  |
| 8.417058 | 9.030849 | 7.1307   |
| 6.164739 | 7.059662 | 6.112849 |
| 5.337171 | 5.41687  | 3.639138 |
| 6.560306 | 7.067572 | 7.108358 |
| 4.72407  | 3.285631 | 5.184415 |
| 8.695246 | 8.51093  | 7.947254 |
| 8.717635 | 9.828769 | 8.046779 |
| 9.696292 | 10.22035 | 9.162201 |
| 8.845944 | 8.650602 | 9.521582 |
| 8.173899 | 8.77323  | 8.037719 |
|          | 4.650387 | 2.292253 |
| 5.590331 | 6.739688 | 6.071356 |
| 5.322866 | 6.420274 |          |
| 5.395097 |          | 4.383545 |
| 5.8535   | 5.952342 | 6.074487 |
| 5.811057 | 6.796467 | 6.384566 |
| 7.654274 | 7.334401 | 8.741032 |
| 5.402751 |          |          |
| 7.053344 | 7.737112 | 7.055169 |
| 4.329327 |          |          |
| 5.786974 | 5.111669 |          |
| 6.011454 |          | 6.187808 |
| 10.00046 | 10.19149 | 9.710465 |
| 7.255021 | 7.66707  | 7.229787 |
| 6.948161 | 7.10233  | 7.186976 |
| 6.742812 | 6.516078 | 6.629256 |
| 4.270737 | 6.127459 | 5.644109 |
| 7.729234 | 8.63109  | 6.360005 |
| 10.25991 | 11.2333  | 9.389105 |
| 9.212077 | 9.898178 | 8.680033 |
|          | 4.292867 |          |

|          |          |          |
|----------|----------|----------|
| 8.561161 | 8.622836 | 8.253503 |
| 9.628785 | 10.07096 | 9.433331 |
| 6.530569 | 6.331493 |          |
| 5.873008 | 5.139801 | 6.220308 |
| 8.069567 | 8.421854 | 7.461377 |
| 7.69836  | 8.389948 |          |
| 6.208576 | 6.583212 |          |
|          | 4.106213 | 6.286163 |
|          | 5.729421 |          |
|          |          | 2.761933 |
| 5.585902 |          |          |
|          | 6.696813 | 5.6583   |
| 9.459791 | 10.0839  | 8.584476 |
| 5.433519 |          | 6.69479  |
| 6.744792 | 6.086066 | 6.020545 |
|          | 6.49676  |          |
|          | 7.174923 |          |
| 5.663652 | 5.56339  |          |
|          | 3.733993 |          |
|          | 5.361601 |          |
| 9.380926 | 9.943274 | 9.156674 |
| 6.889144 | 7.753303 | 6.270088 |
| 7.036604 | 7.728206 | 6.881112 |
| 8.059837 | 8.640037 | 7.957323 |
| 8.385621 | 8.54086  | 8.223546 |
|          | 5.318809 |          |
|          | 5.416346 |          |
| 6.999055 | 7.31812  | 7.652426 |
|          | 5.958524 | 5.935045 |
| 6.5534   | 8.045565 | 6.700163 |
| 8.317105 | 8.721332 |          |
| 6.909259 | 6.483602 | 6.648481 |
| 6.392961 | 5.685225 | 6.931206 |
| 5.674523 | 5.485828 | 4.111843 |
|          | 6.153851 |          |
| 6.235067 | 7.553181 |          |
| 7.861942 | 8.011645 | 7.955399 |
| 5.703898 | 6.249014 |          |

|          |          |          |
|----------|----------|----------|
| 4.947278 |          |          |
|          | 1.608721 |          |
|          | 6.088487 |          |
|          | 5.386941 |          |
| 8.850264 | 9.196738 | 9.237086 |
| 5.667147 |          |          |
| 5.080192 | 6.431605 | 6.27598  |
|          |          |          |
| 8.034347 | 8.280343 | 7.345696 |
| 10.65276 | 10.54281 | 10.21723 |
| 5.580922 |          | 5.920021 |
| 8.174132 | 7.752901 | 7.385891 |
|          |          | 2.920969 |
| 7.119649 | 6.508014 | 7.181938 |
| 6.056669 | 7.412112 | 6.840858 |
| 6.2476   | 6.04251  | 5.230231 |
|          |          | 4.001514 |
| 6.157152 | 7.561083 | 6.332647 |
| 7.164751 | 8.065862 | 7.125464 |
| 9.015006 | 9.587474 | 9.073181 |
| 8.446783 | 9.10511  | 7.990747 |
| 5.070315 | 4.199174 | 6.361122 |
| 5.351733 | 6.0082   |          |
|          |          |          |
| 8.664719 | 9.996281 | 7.665404 |
| 5.759122 | 5.547043 |          |
| 9.627292 | 9.924748 | 10.0243  |
| 3.980113 | 5.444688 |          |
| 9.489427 | 9.660358 | 9.303332 |
| 7.293747 | 8.949406 |          |
|          |          | 6.750822 |
| 9.917767 | 9.980625 | 10.38904 |
| 7.513489 |          |          |
|          |          |          |
| 8.239176 | 7.909842 | 8.846133 |
| 8.227425 | 7.954967 | 7.950821 |
| 5.600354 | 7.1339   |          |
| 6.379417 | 7.39027  | 6.228556 |
| 7.18174  | 7.533391 | 7.14097  |

|          |          |          |
|----------|----------|----------|
|          | 2.921552 |          |
| 8.198999 | 7.520495 |          |
| 8.401257 | 9.112682 | 7.385654 |
| 7.402092 | 7.551938 |          |
|          | 4.436269 | 6.275718 |
|          | 5.93964  | 6.959255 |
|          | 5.571066 |          |
| 5.867746 |          |          |
|          |          | 7.765882 |
| 5.822699 | 6.813274 | 3.533607 |
| 5.779852 |          | 6.363787 |
| 6.114965 | 6.799226 | 5.163033 |
| 10.14501 | 10.13148 | 9.039897 |
| 13.46074 | 13.07387 | 13.04065 |
| 6.396353 |          | 5.890892 |
|          |          | 4.614504 |
| 11.8829  | 11.67588 | 11.69993 |
| 11.15986 | 11.25199 | 11.84297 |
| 10.02406 | 10.38331 | 11.25659 |
| 13.80376 | 14.14664 | 14.06333 |
| 10.52408 | 10.26282 | 10.29308 |
| 12.36217 | 11.34458 | 12.68444 |
| 9.059408 | 9.001107 | 9.355559 |
| 11.45782 | 11.4121  | 11.88602 |
| 9.610841 | 9.064547 | 9.368761 |
| 10.42457 | 11.48431 | 11.32076 |
| 9.022129 | 10.24459 | 9.709088 |
| 12.54919 | 12.71272 | 12.8078  |
| 5.863427 | 5.746389 | 7.48223  |
| 6.984016 | 7.720267 | 7.600735 |
|          | 2.747201 | 4.414076 |
| 11.94354 | 11.78734 | 11.94543 |
|          | 5.682177 |          |
| 4.519508 | 4.934974 |          |
| 8.074388 | 8.202559 | 8.255248 |
| 12.88665 | 12.7553  | 12.5696  |
| 13.01657 | 12.94601 | 13.12254 |
| 10.16527 | 10.41312 | 10.18589 |
| 10.8025  | 10.97181 | 10.52141 |

|          |          |          |
|----------|----------|----------|
| 6.582617 | 7.460482 |          |
| 11.24109 | 12.76027 | 9.898743 |
| 10.39796 | 10.92632 | 11.08026 |
| 9.675593 | 10.81724 | 8.526177 |
| 5.990694 | 6.508317 | 5.668522 |
| 11.50695 | 10.94689 | 11.37755 |
| 10.65681 | 10.93977 | 10.4895  |
| 9.269256 | 9.319115 | 8.489148 |
| 11.77632 | 11.97885 | 11.05211 |
| 5.310784 |          |          |
| 7.02186  | 6.711697 |          |
| 9.309482 | 9.486613 | 9.972629 |
| 10.27072 | 9.377306 | 9.883609 |
| 10.22556 | 9.642521 | 10.07182 |
|          | 7.506274 | 6.933663 |
| 10.45363 | 11.57792 | 9.35134  |
| 10.63652 | 10.77314 | 10.26803 |
| 10.81107 | 11.50473 | 9.06744  |
| 12.82804 | 12.98313 | 11.89098 |
| 10.16037 | 9.634348 | 9.177721 |
| 9.66507  | 8.912145 | 8.234031 |
| 7.589295 | 7.383153 | 8.86895  |
| 13.89249 | 14.05441 | 13.48599 |
| 5.942228 | 5.942499 | 6.055585 |
| 6.318008 | 6.536438 | 7.708671 |
| 11.57463 | 10.9563  | 11.83352 |
| 6.235189 | 5.961821 |          |
| 11.35696 | 11.12186 | 11.69101 |
| 9.775342 | 9.428127 | 8.718791 |
| 7.122831 | 8.41416  | 7.014359 |
| 9.333041 | 9.084838 | 9.816584 |
| 9.015742 | 8.64477  | 8.866364 |
| 7.452328 | 6.554628 | 8.195002 |
| 12.84177 | 12.73313 | 13.29957 |
| 8.834726 | 9.821003 | 8.653155 |
| 13.70565 | 13.47893 | 13.7476  |
| 10.73327 | 11.13766 | 10.79585 |
| 8.613713 | 8.382365 | 8.772815 |
| 5.823557 | 6.990964 |          |
| 9.256836 | 9.179316 | 9.437999 |

|          |          |          |
|----------|----------|----------|
| 8.983359 | 9.211694 | 9.302015 |
| 8.579803 | 8.446077 | 8.901236 |
| 10.19791 | 10.155   | 10.38196 |
| 11.41974 | 11.83349 | 11.51693 |
| 8.997493 | 9.265685 | 8.933932 |
| 7.212882 | 6.155065 | 6.71093  |
| 7.02693  | 8.909891 |          |
| 6.244608 | 6.076805 | 6.876371 |
| 13.0368  | 13.03658 | 12.84212 |
| 4.555588 | 5.124379 |          |
| 10.82239 | 9.849152 | 9.883349 |
| 6.505757 | 7.522409 | 8.006452 |
| 11.7406  | 12.02987 | 11.44188 |
| 10.85439 | 10.9249  | 10.55602 |
| 9.612905 | 10.00365 | 11.21383 |
| 8.725784 | 8.51423  | 9.296862 |
| 10.56977 | 10.57989 | 10.45562 |
| 11.0869  | 11.65587 | 11.48217 |
| 10.28554 | 10.87834 | 10.1188  |
| 9.779969 | 10.53058 | 9.585948 |
| 10.51638 | 9.913969 | 10.37152 |
| 12.31647 | 11.54936 | 12.23205 |
| 13.75784 | 13.86321 | 14.22016 |
| 7.444601 | 7.352148 | 7.316701 |
| 9.993895 | 10.36818 | 10.33407 |
| 10.39914 | 11.26902 | 9.848306 |
| 11.29561 | 11.3254  | 10.9792  |
| 8.374638 | 7.847725 | 8.689957 |
| 6.079637 | 8.05774  | 6.267571 |
| 12.62489 | 11.44526 | 12.37081 |
| 10.80489 | 11.38613 | 11.15819 |
| 7.371461 | 8.406286 | 6.976574 |
| 9.778443 | 9.537199 | 10.25841 |
| 12.86212 | 12.59151 | 13.04294 |
| 10.69887 | 10.70838 | 10.27133 |
| 7.722105 | 8.184771 | 7.888415 |
|          | 5.041593 | 4.891129 |
| 12.52345 | 13.36873 | 11.80688 |
| 8.939387 | 9.043052 | 8.777961 |
| 11.88187 | 12.27702 | 12.20136 |

|          |          |          |
|----------|----------|----------|
| 6.451733 | 3.731208 |          |
| 11.68397 | 11.86826 | 11.5829  |
| 11.49465 | 11.40474 | 11.79922 |
| 11.53431 | 11.66127 | 11.7404  |
| 7.962287 | 9.447919 | 7.537132 |
| 11.3414  | 10.54399 | 11.56844 |
| 6.497833 |          | 6.45176  |
| 7.917171 | 8.21891  | 8.266089 |
| 9.341005 | 9.007892 | 9.588777 |
| 7.325347 | 7.286922 | 6.997879 |
| 14.57515 | 14.47813 | 14.59523 |
| 7.32819  | 7.263454 | 6.738284 |
|          |          | 6.742515 |
| 5.301434 |          |          |
| 10.32328 | 10.56563 | 10.44917 |
| 6.772172 | 5.562845 | 6.81713  |
| 9.983261 | 11.17706 | 9.301888 |
| 6.801868 | 8.315284 | 7.284041 |
| 10.49498 | 10.9392  | 11.24943 |
|          | 5.186391 |          |
| 10.5825  | 9.82338  | 10.14927 |
| 9.771723 | 9.613324 | 10.35061 |
| 6.887397 | 8.27225  |          |
| 13.78708 | 14.22896 | 13.70064 |
| 6.941867 | 8.191031 |          |
|          | 8.460623 | 9.267177 |
| 9.807005 | 9.751419 | 10.13808 |
| 10.96688 | 10.79935 | 10.58845 |
| 11.44539 | 11.69792 | 11.29382 |
| 12.40558 | 12.13585 | 12.17153 |
| 8.854302 | 8.807037 | 8.441151 |
| 11.99459 | 11.50834 | 11.62925 |
|          | 6.188107 | 4.923019 |
| 5.962964 | 7.300715 | 6.85503  |
| 7.391536 | 7.728353 | 6.945232 |
| 4.937633 |          |          |
| 9.276571 | 9.082316 | 9.809652 |
| 8.052657 | 7.832611 | 8.070131 |

|          |          |          |
|----------|----------|----------|
| 8.686921 | 8.940362 | 7.715488 |
| 7.703569 | 9.241265 | 8.329671 |
|          | 5.548784 | 5.555658 |
| 8.933035 | 9.059092 | 8.402052 |
| 12.72894 | 12.75546 | 12.85772 |
| 11.18673 | 11.94797 | 11.6647  |
| 10.08796 | 10.9354  | 10.16087 |
| 3.047994 |          |          |
| 6.943018 | 7.403688 | 7.094778 |
| 8.01409  | 8.341664 | 7.456762 |
| 13.68767 | 13.57162 | 13.46494 |
| 11.47553 | 11.51774 | 11.76556 |
| 6.245895 | 6.710671 | 6.924038 |
|          |          | 7.349468 |
| 9.679453 | 9.156485 | 9.692343 |
| 7.174133 | 9.145748 | 6.765447 |
| 10.60724 | 10.54719 | 10.80118 |
| 11.66457 | 11.43599 | 11.77869 |
| 6.320003 | 6.539121 | 7.039171 |
| 10.10812 | 10.21807 | 10.53486 |
|          |          |          |
| 7.777883 | 8.424339 | 7.400242 |
| 4.359971 | 2.414697 | 11.25943 |
| 11.79844 | 12.35944 | 11.83095 |
| 11.76597 | 11.93666 | 11.57501 |
| 11.58268 | 10.96098 | 12.08985 |
| 8.666844 | 8.80825  | 8.747981 |
| 12.5024  | 12.18865 | 11.93445 |
| 10.75343 | 10.46535 | 10.24824 |
| 10.95032 | 11.01612 | 11.26494 |
|          | 6.47678  |          |
| 10.75045 | 11.17073 | 10.04578 |
| 11.84116 | 11.34887 | 12.19248 |
| 10.69598 | 10.39968 | 10.20097 |
| 6.911534 | 6.663129 | 5.913296 |
| 14.63456 | 13.92872 | 14.97534 |
| 10.19979 | 9.873081 | 10.18656 |
| 11.37707 | 10.93377 | 11.03744 |
| 5.362478 | 6.062673 | 5.137782 |
| 12.69309 | 12.07329 | 11.96777 |



|          |          |          |
|----------|----------|----------|
| 10.15763 | 10.7605  | 10.83505 |
| 8.495825 | 8.244171 | 8.005147 |
| 10.88328 | 10.29892 | 10.77772 |
| 9.94175  | 9.710292 | 9.97675  |
|          | 6.359719 |          |
| 7.10504  | 7.759819 |          |
| 11.55719 | 11.71068 | 11.12654 |
| 13.41569 | 13.56276 | 13.62623 |
| 9.608952 | 8.518846 | 10.36691 |
| 6.840904 | 6.715441 | 6.40262  |
| 11.56905 | 11.00869 | 12.57913 |
| 7.850364 | 7.238446 | 7.583699 |
| 7.340752 |          | 7.485581 |
| 12.18715 | 12.23757 | 11.15285 |
| 10.85878 | 11.16303 | 10.88156 |
| 12.392   | 12.83774 | 12.24878 |
| 9.167374 | 10.33979 | 10.15078 |
| 10.41099 | 10.73298 | 11.19962 |
| 14.52031 | 14.33104 | 14.92014 |
| 8.251829 | 8.698556 | 8.19501  |
| 8.133878 | 8.230384 | 8.287519 |
|          | 6.52252  | 6.481372 |
| 9.756948 | 10.12992 | 9.346766 |
|          |          | 7.196791 |
| 13.40684 | 13.27083 | 13.18222 |
| 10.78299 | 9.928951 | 10.50872 |
| 5.412579 | 6.457475 | 6.763272 |
| 11.05588 | 11.06741 | 10.89011 |
| 14.08856 | 14.12616 | 14.15198 |
| 11.58694 | 11.45363 | 12.21598 |
| 9.446379 | 10.2376  | 9.51719  |
| 9.054065 | 9.491632 | 8.78723  |
| 8.88311  | 8.997727 | 8.86373  |
| 9.64332  | 10.49847 | 9.653449 |
| 10.60686 | 10.37754 | 10.47461 |
| 9.507399 | 9.517597 | 9.601172 |
| 11.85883 | 11.81286 | 11.9941  |
| 6.856738 | 6.957429 | 6.396481 |
| 10.81742 | 10.34771 | 11.11932 |
| 10.27427 | 10.63812 | 10.0001  |

|          |          |          |
|----------|----------|----------|
| 7.977034 | 9.210578 | 7.345421 |
| 5.38115  | 5.497317 |          |
| 8.429585 | 9.125711 | 8.707727 |
| 11.26696 | 11.04474 | 11.2064  |
| 10.23952 | 10.42897 | 10.20615 |
|          |          | 5.602026 |
| 10.2238  | 9.765101 | 10.55246 |
| 7.820455 | 8.761588 | 7.853371 |
| 8.708265 | 8.387257 | 9.098763 |
| 8.964609 | 8.781485 | 9.569899 |
| 12.41115 | 12.10328 | 11.81027 |
| 5.94423  |          | 4.998956 |
| 10.37458 | 10.83233 | 10.40124 |
| 9.44925  | 9.014012 | 9.66505  |
| 8.987425 | 8.289228 | 10.63018 |
| 9.145595 | 9.117634 | 9.89771  |
| 7.034059 | 8.63544  | 6.89532  |
|          | 6.023434 | 4.987332 |
| 10.78929 | 10.85123 | 10.81658 |
|          | 7.671398 | 4.972265 |
| 11.52082 | 10.91721 | 11.49949 |
| 11.25542 | 11.34207 | 11.41337 |
| 8.862949 | 8.493075 | 7.507069 |
| 10.08502 | 10.13544 | 9.725072 |
| 9.330743 | 8.928729 | 9.307971 |
|          |          | 6.049126 |
| 10.68764 | 10.60502 | 10.64003 |
| 12.53225 | 13.13966 | 12.30967 |
| 10.32483 | 6.792627 | 7.403943 |
| 11.88218 | 12.22063 | 12.21999 |
| 11.82581 | 10.98073 | 11.36849 |
| 10.3302  | 9.353256 | 10.02928 |
| 10.13523 | 10.50873 | 10.62335 |
| 10.26191 | 9.982493 | 9.8166   |
| 6.040187 | 6.461922 | 6.868664 |
| 7.820109 | 7.472085 | 8.220214 |
| 11.84327 | 12.17483 | 11.69632 |
| 6.053723 | 7.016365 |          |
| 12.54784 | 13.79063 | 11.39351 |

|          |          |          |
|----------|----------|----------|
| 7.463969 | 7.781097 |          |
| 7.975438 | 8.531349 | 8.024566 |
| 7.551304 | 6.819681 | 7.7721   |
| 9.557711 | 10.19184 | 9.374543 |
| 4.653981 | 5.206526 | 11.53685 |
| 11.95763 | 11.46103 | 11.08427 |
| 5.236793 | 5.834231 |          |
| 8.59771  | 9.008923 | 7.809403 |
| 12.66469 | 13.45707 | 13.11469 |
| 12.44727 | 11.88314 | 12.46214 |
|          | 5.396901 |          |
| 12.45101 | 12.64449 | 12.6446  |
| 9.767941 | 8.907795 | 9.188938 |
| 9.189583 | 9.691154 | 9.438568 |
| 9.995222 | 10.2497  | 10.31618 |
| 9.955676 | 10.31727 | 9.544147 |
| 6.946141 | 7.343199 | 7.773344 |
| 6.745069 | 7.60036  |          |
| 9.177938 | 8.243003 | 9.405443 |
| 5.167702 | 5.639846 | 6.238544 |
| 6.242449 | 7.068405 |          |
| 8.986107 | 9.211925 | 9.352351 |
| 7.159257 | 6.651802 | 7.429255 |
| 8.615994 | 8.383389 | 8.269492 |
| 8.651904 | 9.113721 | 9.337146 |
| 7.754002 | 8.063412 | 8.127657 |
| 7.621453 | 8.809773 | 7.327538 |
| 5.87658  |          |          |
| 7.74842  | 7.939663 | 7.891465 |
| 6.395421 | 7.867373 | 7.932819 |
| 11.22593 | 11.2515  | 10.03456 |
| 9.901353 | 9.076097 | 10.57723 |
| 11.23255 | 10.29559 | 11.05994 |
| 6.7831   | 7.212694 | 8.279791 |
| 11.27429 | 11.33164 | 11.17894 |
| 12.13245 | 12.03877 | 12.08528 |
| 9.909769 | 10.27322 | 10.35082 |
| 12.02793 | 11.22072 | 12.24191 |
| 7.805899 | 7.412534 | 8.25232  |
| 12.23394 | 12.32187 | 12.10709 |

|          |          |          |
|----------|----------|----------|
| 12.09232 | 12.17607 | 11.66599 |
| 6.56518  | 7.240639 | 6.108969 |
| 5.343023 | 5.689095 |          |
| 7.852039 | 7.576855 | 8.202093 |
| 9.060844 | 9.039989 | 8.939865 |
| 9.115962 | 9.342905 | 8.391848 |
| 11.2603  | 11.08799 | 10.43026 |
| 9.6965   | 9.653007 | 9.736479 |
| 7.876976 | 7.847054 | 9.041948 |
| 12.43329 | 12.38753 | 12.88831 |
| 10.11598 | 9.971711 | 9.870199 |
| 11.24367 | 10.9121  | 10.94814 |
| 9.436111 | 9.260015 | 9.833944 |
| 9.203745 | 8.806959 | 9.354203 |
| 7.423986 | 7.662935 | 7.469225 |
|          |          | 4.617288 |
| 10.58023 | 8.82037  | 11.8411  |
| 8.902507 | 9.295882 | 9.209265 |
| 13.01183 | 12.97947 | 12.38099 |
| 10.60624 | 11.21866 | 11.16102 |
| 9.695319 | 9.205729 | 9.241371 |
| 7.691455 | 7.271584 | 8.736064 |
| 11.21408 | 10.95467 | 11.18358 |
| 6.190017 | 6.321907 |          |
| 10.43949 | 9.840274 | 10.18226 |
| 11.94915 | 11.87727 | 10.37909 |
| 10.83639 | 10.84505 | 12.16552 |
| 10.08675 | 9.37824  | 10.37172 |
| 12.11297 | 12.58714 | 12.26259 |
| 8.919356 | 8.753943 | 8.83355  |
| 9.848656 | 8.744336 | 9.930229 |
| 8.502279 | 9.190033 | 8.609806 |
| 7.907967 | 8.389298 | 7.274856 |
| 11.31287 | 11.29262 | 10.99275 |
| 10.37204 | 9.868531 | 10.76527 |
| 9.326724 | 8.47014  | 9.262989 |
| 8.90399  | 9.27243  | 9.624161 |
| 7.51299  | 8.613706 | 8.125282 |
| 6.882892 | 6.866185 | 7.037327 |

|          |          |          |
|----------|----------|----------|
| 11.62896 | 11.04608 | 12.03806 |
| 8.616143 | 9.412514 | 9.255398 |
| 10.46691 | 10.28447 | 10.0337  |
| 8.573885 | 8.856241 | 8.540881 |
| 9.940208 | 10.51104 | 10.09697 |
| 8.144485 | 8.175897 | 8.449736 |
| 12.51631 | 12.3795  | 12.30277 |
| 14.25155 | 14.05562 | 14.64149 |
| 8.798333 | 8.960503 | 11.68263 |
| 8.798633 | 8.570183 | 8.547258 |
| 10.93149 | 11.41497 | 9.863481 |
| 8.489158 | 8.121117 | 8.503948 |
| 7.71879  | 8.42445  | 7.063493 |
| 11.79322 | 12.19415 | 11.29669 |
| 12.30992 | 11.96221 | 12.11045 |
| 10.88585 | 10.69982 | 10.93307 |
| 9.392065 | 9.404306 | 8.83679  |
| 7.011432 | 7.638351 | 7.217343 |
| 9.498292 | 9.827374 | 9.941186 |
| 11.14067 | 10.68724 | 11.21738 |
| 11.51202 | 11.2335  | 11.09091 |
| 11.43502 | 10.94621 | 11.42435 |
| 9.410256 | 7.30755  | 8.866277 |
| 12.14841 | 12.8276  | 12.4087  |
| 10.82577 | 8.302254 | 9.727685 |
| 10.50153 | 9.722841 | 9.705298 |
| 8.663726 | 9.594184 | 8.725497 |
| 12.3542  | 12.60399 | 12.72767 |
| 12.75606 | 12.34031 | 13.05085 |
| 9.678463 | 9.407278 | 9.614001 |
| 8.308318 | 8.408267 | 8.173334 |
| 7.450195 | 7.298933 | 8.25368  |
| 8.883945 | 8.943522 | 8.766359 |
| 6.517131 | 6.213312 | 6.818955 |
| 8.207886 | 8.822088 | 8.837995 |
| 5.962956 | 6.060535 | 6.963956 |
| 6.119685 | 7.619835 |          |
| 12.72752 | 12.45905 | 12.6535  |
| 12.31508 | 12.04071 | 12.56982 |
| 9.355648 | 9.229231 | 9.330715 |

|          |          |          |
|----------|----------|----------|
| 11.41165 | 11.58037 | 11.49484 |
| 11.23476 | 11.30375 | 11.08766 |
| 13.41469 | 13.20145 | 13.62469 |
| 8.026197 | 8.187    |          |
| 7.446957 | 8.347165 | 7.120179 |
| 11.21237 | 10.80382 | 11.35777 |
| 7.764088 | 9.254347 | 7.531167 |
| 9.349824 | 9.875551 | 9.481444 |
| 8.032911 | 8.010957 | 8.705765 |
| 9.70591  | 9.435797 | 9.600866 |
| 11.98811 | 13.23813 | 9.996094 |
| 11.51438 | 12.27431 | 11.68894 |
| 11.55437 | 11.88097 | 12.10784 |
| 6.165495 | 7.927236 |          |
| 8.015711 | 9.365932 |          |
| 9.964197 | 9.918246 | 10.1825  |
| 5.348552 | 4.956131 | 5.363398 |
| 7.148007 | 6.734557 | 7.518717 |
|          | 6.560099 |          |
| 7.657891 | 8.577984 | 7.584238 |
| 10.25796 | 10.3679  | 10.49708 |
| 7.992764 | 7.974843 | 7.648817 |
| 7.984289 | 8.317745 | 8.401162 |
| 8.79728  | 9.108665 | 8.537305 |
| 4.578295 |          |          |
| 7.843141 | 7.490187 | 6.182792 |
| 10.08087 | 10.14293 | 9.924129 |
| 7.417845 | 7.477024 | 7.036417 |
|          | 6.41006  |          |
| 6.064246 |          | 6.796327 |
| 9.84973  | 10.19186 | 9.461749 |
| 9.626613 | 9.560514 | 9.669531 |
| 10.70223 | 10.35425 | 10.82693 |
| 10.76941 | 11.22462 | 10.73164 |
| 10.4464  | 10.39792 | 9.862966 |
| 10.97712 | 10.49291 | 11.48393 |
| 10.10274 | 10.01817 | 10.26763 |
| 10.87037 | 11.05082 | 10.96324 |
| 10.8965  | 10.96002 | 10.70743 |
| 9.04052  | 9.11583  | 9.606244 |

|          |          |          |
|----------|----------|----------|
| 12.14023 | 12.18539 | 11.97176 |
| 11.2078  | 11.17366 | 11.27114 |
| 9.068232 | 9.490349 | 8.903304 |
| 10.7543  | 10.19311 | 9.761983 |
| 7.876948 | 7.792685 | 7.377445 |
| 7.446575 |          | 7.190127 |
| 5.741552 |          |          |
| 9.259781 | 9.671849 | 9.341824 |
| 7.985427 | 8.649774 | 8.708342 |
| 6.517893 |          |          |
| 5.658804 | 8.375699 | 8.732514 |
| 7.010747 | 6.788826 | 6.489614 |
| 10.54757 | 10.44325 | 10.34345 |
| 11.63847 | 11.16585 | 11.89503 |
| 10.84832 | 10.08042 | 10.41889 |
| 12.42022 | 12.75606 | 12.57512 |
| 11.55197 | 11.14971 | 12.04185 |
| 5.98586  | 4.309236 |          |
| 7.650743 | 8.391537 | 9.02272  |
| 8.19635  | 8.076726 | 8.229999 |
| 6.696621 | 7.11697  | 7.579831 |
| 10.57241 | 11.03103 | 11.48815 |
| 8.993066 | 9.471286 | 9.159868 |
| 11.80374 | 12.00938 | 11.04392 |
| 8.894735 | 8.100842 | 9.278196 |
| 9.994629 | 9.850746 | 9.831709 |
| 10.78094 | 10.87899 | 11.24462 |
| 8.78125  | 10.04866 | 9.476994 |
| 8.405293 | 9.110358 | 7.649982 |
| 11.56275 | 11.13772 | 11.32306 |
| 12.33371 | 12.41218 | 12.56688 |
| 12.03129 | 7.751749 | 11.67057 |
| 13.01533 | 13.22429 | 13.34039 |
| 11.83609 | 11.36857 | 11.67376 |
| 5.114209 |          |          |
| 10.50213 | 10.19723 | 10.46205 |
| 11.92131 | 11.64861 | 11.60274 |
| 7.461654 | 7.793917 | 7.255859 |
| 9.081488 | 9.18577  | 9.198904 |

|          |          |          |
|----------|----------|----------|
| 8.510699 | 8.962219 | 8.178288 |
| 10.65575 | 10.99417 | 10.36621 |
| 7.876053 | 7.335086 | 8.286229 |
| 8.31814  | 8.007628 | 8.469754 |
| 8.201592 | 5.738476 | 8.607712 |
| 8.523767 | 8.929626 | 8.361506 |
| 8.983212 | 9.411664 | 9.163461 |
| 8.995373 | 8.523475 | 9.345598 |
| 9.594401 | 9.834148 | 9.355694 |
| 6.74185  | 6.394528 | 5.99047  |
| 11.39972 | 11.26327 | 11.51201 |
| 7.555461 | 8.901158 | 8.881164 |
| 9.509979 | 9.65619  | 9.159333 |
| 10.61875 | 10.64372 | 10.79085 |
| 10.33842 | 10.41834 | 10.01304 |
| 7.09811  | 6.897239 | 7.910345 |
| 12.37884 | 12.34173 | 12.55676 |
| 8.72136  | 9.847862 | 8.081109 |
| 11.35554 | 11.4338  | 11.0434  |
| 11.75165 | 11.26461 | 11.64478 |
| 8.114549 | 7.308338 | 8.00837  |
| 8.253641 | 8.162516 | 7.807133 |
| 5.121382 | 6.339789 | 6.166268 |
| 12.48351 | 11.40404 | 12.47004 |
| 9.021731 | 9.298551 | 8.590905 |
| 11.391   | 12.03712 | 11.11338 |
| 5.185993 |          | 5.898113 |
| 12.46188 | 12.04805 | 12.43616 |
| 12.19677 | 12.33851 | 12.22679 |
| 10.14887 | 9.653252 | 9.973026 |
| 10.57295 | 10.6795  | 9.764995 |
| 10.03417 | 10.40918 | 9.531122 |
| 10.50545 | 11.04623 | 10.91862 |
| 8.313047 | 8.839137 | 9.244786 |
| 7.304794 | 7.134915 | 7.668781 |
| 9.810304 | 9.941142 | 9.156708 |
| 9.51204  | 9.502584 | 9.571668 |
| 11.79443 | 11.55945 | 11.81504 |
| 9.709162 | 8.917354 | 10.36905 |
| 9.315908 | 9.922996 | 9.847634 |



|          |          |          |
|----------|----------|----------|
| 12.51761 | 11.98664 | 11.88406 |
| 7.021754 |          | 6.492078 |
| 11.16112 | 10.60453 | 11.23369 |
| 8.498112 | 7.867183 | 8.678485 |
| 10.94934 | 11.2671  | 11.01871 |
| 9.738923 | 10.04204 | 9.294874 |
| 8.632149 | 8.718355 | 8.935011 |
| 12.96529 | 13.36765 | 13.17854 |
| 11.73963 | 11.89689 | 11.75663 |
| 8.468669 | 9.516631 | 10.06407 |
| 9.438781 | 9.532372 | 9.70495  |
| 6.043862 | 6.528581 |          |
| 6.963402 | 7.414415 | 6.629937 |
| 9.636407 | 8.826126 | 9.756221 |
| 6.769763 | 7.397514 | 7.35356  |
|          | 5.501269 | 4.399575 |
| 10.84845 | 10.98716 | 11.24733 |
| 9.592065 | 9.432062 | 9.384938 |
| 8.425739 | 9.06824  | 7.403815 |
| 11.70641 | 12.12544 | 11.66253 |
| 6.413899 | 6.043926 |          |
| 7.023071 | 7.092444 |          |
| 8.968631 | 9.457259 | 8.752485 |
| 2.900321 | 6.614275 |          |
| 6.696245 | 6.554789 | 7.237077 |
| 5.096688 |          |          |
| 6.733533 | 7.872033 | 6.86914  |
| 8.377026 | 7.775528 | 8.658296 |
| 6.591855 | 6.817847 | 6.354365 |
| 5.489611 |          |          |
| 4.554487 |          | 5.639868 |
| 8.30782  | 8.814033 | 7.446167 |
| 6.370482 | 7.854046 |          |
| 7.195402 | 7.810847 | 6.846865 |
| 6.463655 | 6.245137 | 6.175679 |
| 6.538262 | 7.205228 |          |
| 5.345601 | 3.923506 |          |
| 6.23819  | 6.030525 | 5.208146 |
| 9.387329 | 8.698763 | 9.492188 |

|          |          |          |
|----------|----------|----------|
| 4.379578 | 5.631292 |          |
| 5.908374 |          |          |
| 8.705852 | 7.717022 | 8.265113 |
| 9.374179 | 8.828188 | 9.697804 |
|          | 7.296709 | 8.357685 |
|          | 5.826592 | 6.990681 |
| 6.721767 |          |          |
| 6.848891 | 7.28361  | 6.902264 |
| 6.8705   | 6.865293 | 7.440077 |
| 3.128055 | 6.010038 |          |
| 9.635718 | 8.94631  | 9.611911 |
| 8.411342 | 8.660049 | 8.071226 |
| 7.507935 | 7.45955  | 7.949073 |
| 4.587931 | 7.05566  | 6.610902 |
| 5.82739  |          |          |
| 5.672642 | 5.802754 | 6.629387 |
| 6.044983 | 6.249969 | 6.504834 |
| 6.788677 | 7.114825 | 7.04438  |
| 10.9583  | 11.48387 | 10.37555 |
| 12.50033 | 12.1445  | 12.35764 |
| 6.783925 | 7.225923 | 6.05706  |
| 7.844012 | 9.172974 | 7.604654 |
| 8.238444 | 8.732031 | 8.543823 |
| 4.951359 |          | 5.926835 |
| 9.117095 | 9.140562 | 9.257928 |
|          | 4.05858  |          |
|          |          | 6.446067 |
|          | 5.900657 |          |
|          | 5.519537 |          |
| 5.66253  |          | 5.855547 |
| 5.965802 | 7.449561 | 6.597112 |
|          | 7.747189 |          |
| 7.966913 | 7.305557 | 7.548837 |
|          |          | 4.202683 |
| 6.948418 |          | 6.845053 |
| 5.065441 | 6.098983 |          |
| 5.629393 | 5.859736 | 5.931363 |
| 10.7205  | 10.38838 | 11.04621 |
| 8.730523 | 10.12565 | 7.64694  |
| 5.842199 |          |          |

|          |          |          |
|----------|----------|----------|
| 7.071484 | 7.599114 | 7.038855 |
| 5.993094 | 6.106577 |          |
| 5.520584 |          | 6.309214 |
| 10.19516 | 10.61254 | 10.27517 |
| 11.36178 | 11.95009 | 11.01213 |
| 6.15775  |          |          |
| 5.922872 |          |          |
| 6.425887 |          | 5.772646 |
| 1.644847 | 5.626727 | 6.560576 |
| 7.992475 | 8.232641 | 8.626575 |
| 6.227186 | 6.512045 | 5.073666 |
| 5.61676  | 6.35455  |          |
|          | 5.608376 | 6.280336 |
| 6.051468 |          | 6.10725  |
| 4.927937 |          |          |
| 6.798114 | 7.893037 | 2.710943 |
| 7.67969  | 7.423563 | 7.429356 |
| 7.520803 | 6.522784 |          |
|          |          | 6.444487 |
|          |          | 2.658239 |
|          |          | 5.126155 |
| 8.573483 | 8.950556 | 8.020721 |
| 5.584933 | 5.775272 | 5.293752 |
| 12.1839  | 12.17648 | 11.6561  |
| 11.87176 | 11.98245 | 11.40066 |
|          | 2.21065  |          |
| 5.836561 | 6.036698 |          |
| 5.546754 | 6.672576 |          |
| 6.840974 |          | 6.752428 |
| 6.420489 | 6.216173 | 6.632596 |
| 3.376951 | 5.502209 |          |
| 7.935739 | 8.323542 |          |
|          |          | 7.391682 |
| 5.13698  |          |          |
|          | 5.69119  | 5.987868 |
|          | 5.931719 |          |

|          |          |          |
|----------|----------|----------|
| 5.790888 | 6.392257 | 7.131636 |
| 7.255679 | 7.597397 | 6.619654 |
| 8.525737 | 8.294233 | 8.29525  |
|          | 3.688774 |          |
| 8.390606 | 8.294246 | 8.341851 |
| 3.81562  | 5.199927 | 5.796455 |
| 1.859671 |          |          |
| 10.6911  | 10.70396 | 10.99764 |
| 7.148315 | 6.383325 | 7.403934 |
| 6.242153 | 6.094108 |          |
| 5.54381  | 6.452667 |          |
| 10.39403 | 10.3324  | 9.832432 |
|          |          |          |
| 8.981196 | 8.917522 | 8.841189 |
| 10.72415 | 12.24649 | 12.43688 |
| 6.342869 | 6.821773 | 6.092632 |
| 9.020151 | 9.014402 | 9.059595 |
| 5.995157 | 6.484413 | 5.968147 |
| 6.381153 | 6.531164 |          |
| 6.412    | 6.603743 | 6.112264 |
| 5.900193 | 7.412648 | 6.979038 |
| 8.471969 | 8.406346 | 7.051503 |
|          |          |          |
|          |          | 6.206949 |
| 9.371718 | 8.897421 | 9.338779 |
| 8.479596 | 8.488525 | 8.403529 |
| 10.96485 | 10.90657 | 11.44868 |
| 5.779181 | 6.343198 | 4.716012 |
| 10.26701 | 10.30918 | 10.28945 |
| 6.085302 | 6.599315 | 6.28716  |
| 7.061234 | 8.088307 |          |
| 5.795231 | 6.954339 | 5.776519 |
| 5.896951 |          | 6.521959 |
| 5.176219 |          | 5.846489 |
| 7.871285 | 9.167355 | 6.999855 |
| 7.63444  | 8.168214 | 5.867253 |
| 8.965179 | 8.968942 | 8.200448 |
| 6.980521 | 8.108603 | 7.140568 |
| 6.902187 | 6.364228 | 6.755726 |
| 2.423846 |          |          |

|          |          |          |
|----------|----------|----------|
| 7.778547 | 8.198415 | 8.081829 |
| 9.051398 | 9.17205  | 8.534866 |
| 5.444749 | 6.392535 | 5.609285 |
| 9.829066 | 9.567646 | 9.038856 |
| 7.993201 | 7.604062 | 7.57656  |
| 13.23261 | 13.3232  | 13.29109 |
| 5.59794  | 6.210323 | 5.371208 |
| 6.682885 | 6.780047 | 7.630683 |
|          |          | 5.150116 |
| 9.520705 | 8.613396 | 9.592452 |
| 8.637153 | 8.76433  | 8.337989 |
| 7.333273 | 6.769695 | 5.855115 |
| 5.523476 | 5.070141 | 5.503613 |
|          |          | 2.478699 |
| 9.972347 | 9.907907 | 10.19152 |
| 8.960104 | 8.914982 | 8.121168 |
| 7.167135 | 6.919199 | 7.069182 |
| 9.122539 | 7.586516 | 8.854093 |
| 9.775115 | 9.165093 | 10.08912 |
| 9.401437 | 9.305399 | 9.444367 |
| 6.039227 | 5.227985 | 6.504133 |
| 10.05486 | 9.882841 | 9.607126 |
| 5.953223 | 5.602255 |          |
|          |          | 5.388421 |
|          | 5.615801 |          |
| 6.308112 | 5.999689 |          |
| 5.975679 | 5.513869 | 4.956657 |
| 8.163474 | 6.861688 | 8.282422 |
| 8.89409  | 8.463877 | 8.847142 |
| 5.458324 | 5.443965 | 6.572339 |
| 4.477735 | 5.990687 | 6.398233 |
| 8.181082 | 8.098276 | 7.646006 |
| 7.110835 | 6.428737 | 8.34969  |
| 6.872193 | 7.11166  | 5.956705 |
| 8.967672 | 7.754747 | 8.543728 |
| 6.527638 | 6.493627 |          |
| 10.2266  | 10.65626 | 9.454799 |
| 5.688135 | 6.138621 | 6.535968 |
| 6.194437 | 6.370543 |          |
| 9.433624 | 8.919585 | 8.924976 |

|          |          |          |
|----------|----------|----------|
| 8.32116  | 8.233486 | 8.260383 |
|          | 5.996505 |          |
| 7.542714 | 7.280541 | 7.650218 |
| 7.619162 | 8.012612 | 7.903928 |
| 8.365278 | 8.802321 | 8.997485 |
| 6.529763 | 6.317959 | 6.675991 |
| 7.432196 | 7.857603 | 6.991072 |
| 10.49188 | 9.629539 | 10.8742  |
| 10.39948 | 9.710677 | 10.69696 |
| 7.245281 | 6.563292 | 6.013535 |
| 6.683895 | 6.404143 | 6.905265 |
| 8.728464 | 9.039995 | 8.489351 |
| 5.233942 | 5.625083 | 5.165947 |
| 9.770095 | 9.316202 | 10.03786 |
| 8.879732 | 8.592279 | 8.893511 |
|          | 4.286984 |          |
|          | 6.63062  |          |
| 8.612797 | 10.00698 | 9.606521 |
| 9.001737 | 8.786407 | 8.344915 |
|          | 1.720667 |          |
| 6.782444 | 7.054412 | 6.259576 |
| 11.71679 | 11.46521 | 11.96121 |
| 6.639666 | 7.627585 | 6.412895 |
| 5.811511 |          |          |
| 7.167639 | 7.707829 | 7.306301 |
| 8.97398  | 8.815804 | 9.192149 |
| 6.175804 | 7.477296 | 6.611767 |
| 5.204839 | 5.73642  |          |
| 12.9822  | 12.85854 | 13.25189 |
| 10.66933 | 10.33916 | 10.7767  |
| 10.81734 | 11.25259 | 10.64453 |
| 6.404427 | 6.448033 | 6.406169 |
| 9.510705 | 9.900613 | 9.976086 |
| 8.694177 | 8.534581 | 8.32113  |
| 6.094873 | 6.57892  | 6.965607 |
| 5.025727 |          | 6.111087 |
| 10.11282 | 10.46914 | 10.1348  |
| 8.498232 | 8.569692 | 9.773183 |
| 9.910112 | 10.57375 | 10.16689 |
| 8.940409 | 9.339006 | 8.322486 |

|          |          |          |
|----------|----------|----------|
| 1.775388 |          |          |
|          | 5.60244  | 4.013502 |
| 11.86575 | 12.09302 | 11.85407 |
| 9.0726   | 8.450776 | 9.070005 |
| 6.532856 | 5.837185 | 6.992821 |
| 10.67443 | 9.819494 | 11.16964 |
| 10.90292 | 10.19795 | 10.18546 |
| 8.311578 | 7.363496 | 7.926691 |
| 8.049044 | 8.017965 | 7.733569 |
| 5.544909 | 7.397305 | 6.714017 |
| 12.20172 | 12.22026 | 11.90514 |
| 9.657252 | 9.765964 | 10.12544 |
| 6.53291  | 7.602414 | 6.861427 |
| 6.256882 | 6.982548 | 6.326343 |
| 7.415707 |          |          |
| 5.180052 |          |          |
| 4.864609 | 6.667618 |          |
| 7.50144  | 8.035352 | 7.723153 |
| 8.105458 | 8.463586 | 8.790607 |
| 1.833184 |          |          |
| 10.10119 | 10.01169 | 9.584885 |
| 6.912568 | 6.983648 | 8.042442 |
|          |          |          |
| 7.551024 | 7.104542 | 7.213838 |
| 8.467202 | 8.461165 | 8.839753 |
| 12.63819 | 12.63935 | 13.19178 |
|          | 5.720495 | 5.714311 |
| 9.866251 | 9.682256 | 10.03413 |
| 6.019424 | 5.129109 | 5.801804 |
| 10.14767 | 9.568656 | 10.13805 |
| 9.990276 | 8.712271 | 10.20279 |
| 8.378608 | 8.313767 | 9.858269 |
| 9.880384 | 9.336537 | 10.91302 |
| 7.171741 | 8.193859 | 7.286324 |
| 10.48911 | 10.65672 | 8.927685 |
|          |          |          |
| 6.514381 |          | 6.233155 |
| 6.945059 | 6.365804 | 7.928792 |
| 12.30887 | 12.44781 | 12.24478 |
| 9.921978 | 9.836978 | 10.34388 |

|          |          |          |
|----------|----------|----------|
| 6.867632 | 7.317545 | 6.94173  |
| 12.43129 | 12.07466 | 12.48439 |
| 5.683404 |          | 6.033811 |
| 4.745356 |          | 4.658951 |
| 6.919864 | 7.314366 | 7.372402 |
| 11.62159 | 12.12157 | 11.95664 |
| 11.73244 | 11.70831 | 11.45552 |
| 9.595663 | 9.233236 | 9.002544 |
| 7.561894 | 7.779304 | 8.172161 |
| 6.696846 | 7.668963 | 7.078847 |
| 4.856134 |          | 2.961012 |
|          |          | 2.727797 |
| 5.346514 |          |          |
|          |          | 6.651986 |
| 9.071768 | 9.825204 | 9.141216 |
| 8.801133 | 8.228234 | 8.800836 |
| 9.833909 | 9.563213 | 9.902992 |
| 8.998291 | 8.648894 | 8.274799 |
| 11.4188  | 10.2921  | 11.8019  |
| 7.650531 | 7.26231  | 7.521328 |
| 8.185044 | 8.129873 | 8.752654 |
| 10.2264  | 9.802662 | 10.03916 |
| 9.101442 | 9.165175 | 9.343691 |
| 12.32845 | 12.41617 | 12.63274 |
| 8.57219  | 8.389709 | 8.404337 |
| 11.65094 | 11.27584 | 11.56802 |
| 6.154533 | 6.126411 | 6.829428 |
| 6.288687 | 6.964343 |          |
| 5.739818 | 6.581596 |          |
| 8.218103 | 8.236747 | 8.172381 |
| 11.70185 | 11.77162 | 11.5286  |
| 7.917487 | 7.370836 | 7.893129 |
| 7.204952 | 7.470603 | 7.270582 |
| 10.02971 | 10.39775 | 9.690242 |
| 11.99294 | 11.94345 | 12.38837 |
| 10.99119 | 11.13894 | 10.93193 |
| 9.203065 | 9.667135 | 8.60986  |
| 9.293903 | 9.617264 | 9.264975 |
| 5.912592 | 6.852367 | 7.518061 |
| 9.347052 | 9.179268 | 9.34623  |



|          |          |          |
|----------|----------|----------|
| 7.129386 | 6.137603 | 7.418608 |
| 9.693507 | 9.530803 | 10.41521 |
| 9.335959 | 9.04641  | 9.491108 |
| 10.98996 | 11.3939  | 10.8123  |
| 9.05053  | 9.44072  | 7.498725 |
| 8.230392 | 9.262353 | 7.051877 |
|          | 7.602417 |          |
| 7.514545 | 10.26156 | 6.71124  |
| 7.772182 | 9.67793  |          |
| 13.5673  | 13.21345 | 13.43171 |
| 5.76144  | 6.205096 | 6.803677 |
| 5.560119 | 5.207679 | 5.671333 |
| 8.474161 | 8.038785 | 7.930563 |
| 9.097503 | 9.17877  | 8.693646 |
| 9.796317 | 9.634366 | 10.80066 |
| 6.587846 | 7.380223 | 6.291615 |
| 8.362075 | 7.506506 | 7.288887 |
| 5.167352 | 6.208608 | 6.005016 |
|          |          | 3.671048 |
|          | 6.270183 |          |
| 6.393382 | 7.036095 |          |
| 6.424144 | 6.232903 | 6.436939 |
|          | 5.495005 |          |
| 7.033577 | 6.193997 | 6.73153  |
| 11.21665 | 11.67427 | 10.69288 |
| 5.860971 |          | 5.192534 |
| 10.43398 | 10.37156 | 10.89656 |
|          |          | 4.328989 |
| 6.896637 | 6.934867 | 6.830351 |
| 11.67354 | 11.95337 | 11.70652 |
| 7.201465 | 6.889486 | 7.932482 |
| 7.461152 | 7.875176 | 7.361521 |
| 11.69768 | 11.71514 | 12.36045 |
| 11.59264 | 11.38416 | 11.88475 |
| 6.965024 | 5.654744 | 6.507669 |
|          |          |          |
| 10.62682 | 10.77864 | 10.29205 |
| 7.634786 | 7.274233 | 7.367061 |
| 5.811104 | 6.147495 | 6.049488 |
| 6.402302 |          | 5.181479 |

|          |          |          |
|----------|----------|----------|
| 7.723434 | 7.509931 |          |
| 8.340296 | 8.451766 | 8.077965 |
|          | 5.076923 | 5.055841 |
| 9.644213 | 10.74151 | 8.523006 |
| 9.152168 | 9.722284 | 9.396201 |
|          | 6.469317 | 7.397987 |
| 6.28755  | 7.581564 |          |
| 11.69372 | 11.94296 | 11.74355 |
| 10.86896 | 11.02114 | 10.78142 |
| 5.182523 | 6.71947  | 6.075192 |
| 6.593268 | 7.814487 |          |
| 8.923365 | 10.29728 | 7.692868 |
|          |          | 6.036829 |
|          | 6.92222  |          |
| 7.78443  | 8.556434 | 7.748614 |
| 5.030037 |          | 5.691127 |
| 7.788242 | 8.724794 |          |
| 9.782283 | 9.457625 | 9.342947 |
| 5.832836 | 7.020997 | 5.864742 |
| 10.84298 | 10.70112 | 10.96374 |
| 10.26401 | 9.962047 | 10.84696 |
| 6.170407 | 6.925208 | 7.017783 |
| 4.603833 | 5.942098 |          |
|          |          | 7.013863 |
| 9.173719 | 9.370324 | 8.685336 |
| 6.289159 | 6.778138 | 5.867906 |
| 7.114809 | 6.899845 | 5.986929 |
| 6.410188 | 7.599361 | 6.408026 |
| 10.24183 | 9.940681 | 10.08355 |
| 7.849788 | 10.48882 | 9.502585 |
| 8.09377  | 7.683648 | 8.261304 |
| 8.512527 | 9.363956 | 9.137551 |
| 4.447674 |          |          |
| 9.47865  | 9.345401 | 8.940623 |
| 12.23406 | 12.30475 | 12.67312 |
|          | 6.909887 | 7.513202 |
| 7.088895 | 7.422169 | 6.489259 |
| 10.69838 | 10.79657 | 10.8332  |
|          | 5.440979 |          |
| 7.635112 |          | 7.287669 |

|          |          |          |
|----------|----------|----------|
| 7.627703 | 8.315478 | 6.669816 |
| 9.932339 | 9.303144 | 9.523664 |
|          | 5.636262 | 5.946519 |
| 11.49707 | 11.23338 | 11.60774 |
| 12.96385 | 13.59924 | 13.73403 |
| 9.655561 | 8.948784 | 9.761556 |
| 5.122497 | 6.014923 |          |
|          |          | 4.219848 |
|          | 3.229496 |          |
| 6.238598 | 6.127706 | 6.498493 |
| 10.71228 | 10.54984 | 10.76372 |
| 9.284477 | 9.076212 | 9.684755 |
| 7.324087 | 6.332388 | 6.686173 |
| 8.360043 | 8.161785 | 9.177544 |
| 9.236593 | 9.254051 | 9.278188 |
|          | 5.218726 | 6.327702 |
| 10.28584 | 10.50961 | 9.733622 |
| 10.81574 | 9.730709 | 11.75545 |
| 6.773004 | 7.371618 | 5.879346 |
| 11.96424 | 11.97611 | 12.22612 |
| 8.314667 | 8.457335 | 8.15193  |
| 7.388145 | 9.127279 | 7.758763 |
| 8.103047 | 7.768404 | 8.622093 |
| 9.129518 | 9.057594 | 9.208757 |
| 6.641809 | 6.770791 | 6.809547 |
| 6.539641 | 6.685595 |          |
| 9.177961 | 9.433024 | 10.14875 |
| 3.236687 | 6.064591 | 6.517856 |
| 10.21994 | 10.101   | 10.06338 |
| 5.606211 | 6.918828 | 7.570861 |
| 6.087936 | 5.943377 | 6.801154 |
| 6.817659 | 7.165971 | 6.949808 |
| 4.937388 | 5.889232 | 6.668109 |
| 6.18767  | 6.715386 | 7.865239 |
| 11.00728 | 11.25579 | 10.97789 |
| 6.287301 | 4.594333 | 6.479198 |
| 6.06281  |          |          |
| 4.627862 | 6.533968 | 5.85289  |
| 8.423589 | 9.402535 | 7.768657 |

|          |          |          |
|----------|----------|----------|
| 9.544751 | 9.10605  | 9.148708 |
| 7.793681 | 7.609479 | 8.369304 |
|          |          | 1.001666 |
| 6.260587 | 6.766398 | 6.911418 |
| 6.154882 | 6.35747  |          |
| 8.999519 | 8.755747 | 9.057838 |
| 10.30412 | 10.51766 | 10.48921 |
| 9.269019 | 8.578927 | 9.464455 |
| 14.63564 | 14.57167 | 14.846   |
|          | 5.976489 | 6.554958 |
| 5.678339 | 4.43974  | 5.892914 |
| 7.319327 | 7.92689  | 7.335521 |
| 10.82304 | 10.36455 | 10.42692 |
| 7.76082  | 8.748546 | 7.580512 |
| 5.760774 | 5.608467 |          |
|          |          |          |
| 6.482565 | 7.115166 | 7.36464  |
| 7.624154 | 8.930478 | 8.202075 |
|          | 6.344588 |          |
| 5.14808  | 5.85618  | 4.717881 |
| 6.090219 | 7.00132  | 6.453317 |
|          |          | 5.614985 |
| 8.665032 | 8.701414 | 8.696432 |
| 9.401358 | 9.954527 | 9.304453 |
| 7.128693 | 8.914816 | 7.139815 |
| 4.318667 | 4.813629 |          |
|          | 6.444464 |          |
| 7.029364 | 7.707279 |          |
|          | 5.286093 |          |
|          | 5.92705  | 5.972627 |
|          |          | 5.561449 |
|          | 2.2189   |          |
| 8.095614 | 7.813447 | 10.63729 |
| 5.581468 |          |          |
| 12.32289 | 12.06857 | 12.23816 |
| 5.74089  |          | 7.085553 |
|          | 5.991241 | 6.021014 |
| 6.278281 | 7.385325 | 7.882741 |
| 5.189099 | 4.919773 | 6.959411 |
| 4.781473 | 6.55004  | 7.222491 |

|          |          |          |
|----------|----------|----------|
| 8.430573 | 9.057676 | 8.346803 |
|          | 1.93235  | 7.403676 |
|          |          | 4.435404 |
| 5.621321 |          | 6.989544 |
| 6.422534 | 6.885397 |          |
|          | 7.422905 |          |
| 7.985663 | 7.615938 | 6.249024 |
| 9.297079 | 9.447782 | 9.111657 |
|          | 4.447919 |          |
| 8.766821 | 10.06614 | 8.858148 |
| 9.918252 | 10.25017 | 9.43701  |
| 10.57558 | 10.5146  | 10.68164 |
| 9.088634 | 9.207974 | 8.000641 |
| 4.331939 |          |          |
| 9.617273 | 8.782056 | 10.27431 |
| 2.918297 |          |          |
| 5.913372 | 5.754664 | 6.356788 |
| 5.615319 | 6.345059 | 5.315218 |
| 8.603215 | 8.644959 | 7.97716  |
| 4.837593 | 6.370987 |          |
| 8.888865 | 7.962863 | 7.893653 |
| 6.752185 | 6.469523 | 7.667851 |
| 5.031396 |          |          |
|          | 6.705435 |          |
|          | 7.596084 | 7.40644  |
| 7.728732 | 8.914727 |          |
| 6.285303 | 6.704689 | 6.904585 |
|          | 5.243681 | 4.477087 |
| 5.893515 |          |          |
| 8.901052 | 8.566678 | 8.479209 |
| 4.696901 | 4.873803 | 5.777482 |
| 6.954786 | 6.920421 | 6.679967 |
|          |          | 5.48462  |
| 9.725965 | 9.663443 | 9.697962 |
| 9.587701 | 9.690083 | 9.872433 |
| 9.898068 | 9.984845 | 9.765078 |
|          |          | 6.564691 |
| 6.475905 | 7.365875 | 5.945624 |
| 9.397812 | 10.15282 | 7.941725 |
| 7.586575 | 7.296907 | 8.453362 |

|          |          |          |
|----------|----------|----------|
| 5.983018 | 4.587247 | 5.783025 |
|          | 6.045447 |          |
| 7.746775 | 8.894142 | 8.596339 |
| 5.281107 | 5.563951 |          |
| 6.611859 | 6.629709 | 4.42814  |
| 10.79447 | 11.16132 | 10.61635 |
| 6.643598 | 7.912052 | 7.683734 |
| 6.650937 | 7.644908 | 6.232258 |
| 4.657994 |          | 5.830907 |
|          | 5.83458  | 5.825588 |
| 5.533046 | 5.895585 | 5.697664 |
| 7.319542 | 7.675532 | 6.70125  |
| 4.588805 |          |          |
|          |          | 5.587275 |
| 7.624929 | 7.974336 | 7.294345 |
| 9.181659 | 10.10406 | 9.44192  |
| 6.402129 | 6.945276 |          |
| 5.111024 | 4.60375  |          |
|          | 5.895218 |          |
| 6.112148 | 6.25435  | 6.847763 |
|          | 5.714235 |          |
| 11.69722 | 11.4101  | 11.25116 |
| 8.337473 | 7.936917 | 7.956455 |
| 7.489626 | 6.596966 | 7.670728 |
| 6.262251 | 5.86164  | 5.16439  |
| 4.909877 | 6.026349 | 7.12181  |
|          |          |          |
| 3.096044 |          | 5.961702 |
| 10.31226 | 10.50643 | 10.37592 |
| 7.283147 | 6.367405 | 7.912119 |
| 9.236005 | 10.26043 | 8.321344 |
| 5.067469 | 6.118432 |          |
|          | 6.110401 |          |
| 6.892225 | 7.761165 | 7.614894 |
| 8.415754 | 7.9873   |          |
|          |          | 4.999288 |
| 5.970457 | 7.157153 | 6.101859 |
| 9.650139 | 10.02232 | 8.666367 |
| 8.229478 | 8.544732 | 7.835747 |
| 5.573019 | 6.913441 |          |

|          |          |          |
|----------|----------|----------|
| 6.370493 |          |          |
|          | 5.80171  |          |
| 9.132056 | 9.035885 | 8.691394 |
| 7.677306 | 8.127359 |          |
| 5.587962 | 5.288398 | 6.461967 |
| 6.069069 |          | 4.981496 |
| 7.737103 | 7.598079 |          |
| 5.491831 | 6.247378 | 6.430604 |
| 10.98168 | 11.19851 | 10.65653 |
| 8.932927 | 9.771468 | 7.611363 |
| 8.549514 | 7.884279 | 6.923873 |
| 6.234181 | 6.742657 | 6.486075 |
| 7.621459 | 8.194185 | 6.946575 |
|          | 6.337018 |          |
| 7.283163 | 7.572022 | 6.199279 |
| 5.893954 | 7.025109 |          |
| 3.596625 |          |          |
|          | 3.642224 | 4.788661 |
| 4.425751 | 5.028213 |          |
| 9.407772 | 10.05532 | 9.069405 |
| 8.44307  | 8.508558 | 8.18085  |
|          |          | 6.741068 |
| 4.530722 |          |          |
| 6.651675 |          | 7.318415 |
|          | 7.009119 |          |
| 10.187   | 10.66545 | 9.466511 |
| 7.462106 | 6.697466 | 7.518939 |
|          |          |          |
| 6.469883 | 7.083763 | 5.745318 |
| 4.889296 | 5.186771 |          |
| 7.391087 | 7.184895 | 7.328015 |
| 4.628561 |          |          |
| 6.765364 | 5.321741 | 6.804299 |
|          | 5.406901 |          |
|          | 7.000242 |          |
| 6.650924 | 7.209149 | 5.655603 |
| 6.86131  | 5.343626 | 6.11115  |
| 8.349168 | 9.130493 | 7.187543 |
| 6.791777 | 6.715547 | 5.751335 |

|          |          |          |
|----------|----------|----------|
| 4.081421 | 4.337975 | 6.364885 |
| 6.415488 | 7.593651 |          |
|          | 5.609586 | 7.361652 |
| 9.106472 | 9.316898 | 8.703913 |
| 6.136033 | 6.45997  | 6.239075 |
| 8.156836 | 8.612292 | 7.472805 |
| 7.301094 | 8.246506 | 6.274454 |
| 10.36494 | 10.84222 | 9.869054 |
| 6.35833  |          | 7.329103 |
|          |          | 5.999895 |
|          | 5.668538 |          |
| 8.878382 | 8.330971 | 8.737649 |
|          | 6.532147 |          |
| 6.277876 | 7.177338 | 6.270258 |
| 10.43525 | 10.57845 | 9.267983 |
| 6.65215  | 7.632239 |          |
| 6.564397 | 6.590118 |          |
| 6.419032 |          | 7.140469 |
| 6.432416 | 5.616272 | 6.934681 |
| 7.458509 | 7.611511 | 7.043618 |
| 5.979441 | 6.866403 | 6.236908 |
| 7.548935 | 8.072129 | 6.744139 |
| 10.11043 | 10.16799 | 9.384011 |
| 8.637246 | 8.953935 | 7.613471 |
|          | 6.960053 |          |
|          | 5.897878 |          |
| 5.635699 | 6.739263 | 5.309863 |
| 12.04882 | 12.05377 | 11.81193 |
|          | 5.739027 |          |
| 6.19611  | 6.180422 |          |
| 5.478345 | 5.64484  | 6.647836 |
| 7.829767 | 8.46979  | 7.791448 |
| 8.974484 | 9.202409 | 8.900477 |
| 10.9753  | 11.2154  | 11.38533 |
| 7.581631 | 7.973452 | 6.384029 |
| 5.225767 |          |          |
| 5.01024  |          | 5.537446 |
| 11.559   | 11.48607 | 10.96927 |
| 5.149284 | 6.615836 | 6.508122 |



|          |          |          |
|----------|----------|----------|
| 5.967125 | 6.991647 |          |
| 10.2091  | 10.20038 | 10.03582 |
| 9.363852 | 10.05076 | 9.086522 |
| 6.018166 | 5.83962  | 6.438277 |
|          | 4.9315   |          |
| 5.301843 | 6.193595 | 4.823321 |
| 5.8776   |          | 6.365403 |
| 7.183047 | 5.613958 | 5.818401 |
| 7.210375 | 7.494388 | 6.632703 |
| 5.964848 | 7.873148 | 6.856181 |
| 7.316003 | 7.885421 | 6.962453 |
| 5.188477 |          | 2.337322 |
| 4.479934 | 6.693193 |          |
| 5.639174 | 4.812967 | 6.826829 |
| 7.030928 | 7.24681  | 7.262214 |
|          | 7.953574 |          |
| 3.963671 |          |          |
| 7.645429 | 7.569124 | 7.621461 |
| 6.495364 | 6.805915 | 6.460358 |
|          | 4.670621 | 5.253918 |
| 8.659081 | 8.52962  | 8.376303 |
| 6.67926  | 7.448585 | 6.502513 |
| 7.246524 | 7.298808 | 6.957175 |
| 7.81757  | 8.897189 | 8.22372  |
| 6.471808 | 7.797587 | 6.503911 |
| 6.159952 | 6.342001 | 5.759185 |
|          | 5.532093 | 3.026985 |
| 6.393041 | 5.417672 |          |
| 8.056843 |          |          |
| 5.678947 | 6.570227 | 6.997349 |
| 9.056464 | 9.676653 | 9.015141 |
|          | 2.55613  |          |
| 8.934495 | 8.791745 | 8.247625 |
| 9.042693 | 8.959144 | 8.081664 |
|          |          | 5.692727 |
| 7.310992 | 6.608645 | 5.498158 |
| 10.16585 | 10.11903 | 9.291196 |
| 6.427861 | 7.169255 | 3.791727 |
| 4.586404 | 6.312191 | 4.558137 |

|          |          |          |
|----------|----------|----------|
| 5.584462 |          | 4.309596 |
|          | 5.977729 |          |
| 4.531645 |          |          |
|          |          | 4.999498 |
| 8.660863 | 8.328166 | 8.212338 |
| 8.612544 | 8.12803  | 7.372131 |
| 5.569709 | 6.179555 | 6.333737 |
| 5.268016 | 5.326326 |          |
| 10.31141 | 10.85341 | 9.914264 |
| 7.660596 | 7.861826 |          |
|          | 4.646505 | 0.665353 |
| 4.862978 |          |          |
| 7.084461 | 7.456276 |          |
| 6.612573 | 7.205323 | 7.231177 |
| 8.533474 | 8.927072 | 8.435264 |
| 6.446798 | 6.641904 |          |
| 5.975973 | 6.571783 |          |
|          | 6.51487  |          |
|          | 5.472745 |          |
|          | 6.310156 |          |
| 9.176689 | 8.985822 | 9.169578 |
|          |          | 5.173146 |
| 7.975469 | 8.425118 | 7.74155  |
| 8.93464  | 8.750162 | 7.941514 |
|          | 6.112403 |          |
| 10.03592 | 11.05822 | 9.18105  |
| 6.960788 | 7.845163 | 7.681177 |
| 8.833376 | 8.820085 | 6.857185 |
| 5.861558 | 6.177778 | 6.820379 |
|          |          | 7.005871 |
| 5.183025 | 5.796373 | 5.325697 |
| 3.478255 | 5.969312 | 6.304163 |
| 6.715352 | 7.035245 | 6.955338 |
| 5.767741 |          |          |
| 6.805477 | 6.325419 | 5.280137 |
| 7.498916 | 7.19032  | 7.824413 |
| 6.026866 | 6.887976 | 6.659978 |
| 6.94325  | 6.55877  | 6.856069 |
| 6.292245 | 5.567791 |          |
| 8.478772 | 8.450676 | 7.549086 |

|          |          |          |
|----------|----------|----------|
| 5.8479   | 6.877378 | 6.142472 |
| 5.815713 | 6.599063 |          |
| 8.514889 | 8.012831 | 7.853126 |
|          | 5.703954 | 6.075366 |
| 6.074605 | 7.452455 |          |
| 7.581217 | 8.170898 |          |
| 7.944418 | 9.551125 | 7.883253 |
| 6.181434 | 6.341421 | 5.822575 |
|          | 6.41499  | 5.582599 |
| 6.37974  | 6.745828 | 6.526402 |
| 11.02176 | 11.28436 | 9.39304  |
| 6.849809 | 7.387637 | 7.330316 |
| 7.099613 | 6.134347 | 6.655826 |
| 6.36188  | 7.027404 | 5.459526 |
| 6.574076 | 5.758236 | 5.753026 |
| 7.31347  | 8.122388 | 7.034886 |
| 7.803863 | 8.083789 | 6.994348 |
| 2.624975 | 6.503321 |          |
| 6.949267 | 6.487866 | 7.532972 |
| 9.108239 | 8.848412 | 9.508304 |
| 5.612676 | 4.925871 | 4.687497 |
| 8.87691  | 9.354579 | 8.336336 |
|          | 5.849134 | 4.686447 |
| 6.323764 | 4.826974 |          |
| 7.794725 | 7.961105 | 7.608218 |
| 7.424943 | 8.953278 | 6.753558 |
| 8.949554 | 9.762044 | 8.592747 |
| 5.736276 | 4.939095 | 6.200023 |
|          | 6.608191 |          |
| 5.816709 | 6.355924 | 7.110946 |
| 11.44606 | 11.6951  | 11.08257 |
|          | 5.479538 |          |
|          |          | 5.037203 |
| 8.661514 | 9.146768 | 7.614065 |
| 9.220608 | 10.4698  | 8.844589 |
| 5.925401 | 6.545801 | 6.514704 |
|          | 5.654788 | 6.81303  |
| 6.179086 | 6.367483 | 6.624593 |

|          |          |          |
|----------|----------|----------|
| 6.50026  | 6.256994 | 5.928161 |
| 5.783173 | 4.423485 | 6.117571 |
| 5.907683 | 5.599422 |          |
|          |          | 6.158751 |
| 3.93449  |          | 5.888024 |
|          | 6.139201 | 5.76992  |
| 9.126217 | 9.186394 | 8.497911 |
| 10.72625 | 10.28263 | 10.45892 |
| 7.033854 | 8.007901 | 7.159179 |
|          | 3.846102 |          |
|          |          | 5.840331 |
| 8.763196 | 8.539218 | 9.007712 |
| 6.416442 | 7.626698 | 5.583001 |
| 9.588284 | 9.724178 | 9.611877 |
| 1.787516 | 6.599718 | 4.66816  |
| 5.756726 | 6.335379 | 6.597265 |
|          | 7.331517 |          |
|          | 6.760513 |          |
| 6.317534 |          |          |
| 7.771749 | 8.214106 | 7.365394 |
|          |          | 6.706803 |
| 6.734844 | 8.099273 | 5.391901 |
| 4.226097 |          |          |
| 8.693158 | 9.407432 | 7.411083 |
|          |          |          |
| 4.96308  | 5.914683 | 5.147562 |
| 6.107604 | 6.253134 | 6.650311 |
|          |          | 6.370373 |
|          | 5.505032 | 5.5373   |
| 9.46091  | 9.630687 | 9.320394 |
| 7.434652 | 6.659113 | 7.425516 |
| 6.617685 | 7.687418 | 6.544579 |
| 9.196663 | 9.376455 | 8.641024 |
| 5.126788 |          |          |
| 6.042242 | 6.571271 | 5.783469 |
| 8.406273 | 8.701599 | 7.050996 |
| 7.349473 | 7.795566 | 7.768609 |
| 7.682632 | 7.920667 | 6.510127 |
| 5.099591 | 4.997932 | 5.889063 |
|          | 6.033407 |          |

|          |          |          |
|----------|----------|----------|
| 6.3175   | 5.74603  |          |
| 9.851498 | 9.938228 | 9.734676 |
| 8.398131 | 8.638606 | 8.024598 |
| 7.966275 | 7.833707 | 8.361912 |
| 6.750238 | 7.275169 |          |
| 7.43724  | 8.067191 | 7.236393 |
| 3.585453 |          |          |
| 8.860789 | 9.237801 | 8.324163 |
| 5.698637 | 6.396268 | 6.333604 |
| 5.875282 |          |          |
|          | 5.801284 | 5.560701 |
| 6.696921 | 6.908018 |          |
| 4.106001 |          |          |
| 5.63659  | 6.558385 | 6.532241 |
|          | 5.457323 |          |
| 6.313429 | 7.586538 |          |
|          |          |          |
| 7.012301 | 6.809042 | 6.840952 |
|          |          |          |
| 5.947117 |          | 5.683206 |
| 3.258188 |          |          |
| 8.784846 | 8.711764 | 7.787868 |
|          | 3.21106  |          |
|          | 5.540287 | 4.872103 |
|          | 6.545945 |          |
| 4.946466 |          |          |
| 2.729844 | 5.895243 |          |
| 6.04026  | 6.21787  | 4.986813 |
| 7.370412 | 8.06032  | 7.835753 |
|          |          |          |
|          | 6.488234 |          |
| 10.27623 | 9.36993  | 9.04459  |
| 8.505227 | 8.759054 | 8.136633 |
| 6.727063 | 6.820743 | 6.28059  |
| 6.461104 | 6.271716 | 7.02457  |
| 10.73128 | 9.961382 | 10.96094 |
| 3.510196 |          |          |
| 4.555437 | 7.283555 | 5.636287 |

|          |          |          |
|----------|----------|----------|
| 6.647147 | 7.827926 |          |
| 5.244988 | 5.198368 | 6.196719 |
| 5.051571 | 5.176246 |          |
| 6.885347 | 6.022689 | 6.320839 |
| 9.34052  | 9.455562 | 9.739566 |
| 7.45573  | 7.552249 | 8.499754 |
| 9.050525 | 9.084016 | 9.472105 |
|          |          | 5.188793 |
| 11.7589  | 12.22786 | 10.94842 |
|          | 6.022163 |          |
| 5.547245 | 7.228863 | 5.998962 |
| 6.986019 | 7.459827 | 8.074835 |
| 7.896567 | 8.484336 | 7.841181 |
| 10.80401 | 10.56628 | 10.88311 |
| 4.996726 |          |          |
| 10.2567  | 10.83821 | 9.138419 |
| 7.218916 | 7.796656 | 6.100771 |
| 8.620955 | 8.173283 | 9.222221 |
| 9.300337 | 9.742269 | 9.015039 |
| 6.942498 | 6.098745 | 7.483832 |
| 8.487922 | 8.332199 | 8.750566 |
| 6.491158 | 7.269993 | 6.616683 |
| 5.805319 | 6.121904 |          |
| 6.961433 | 7.065044 | 7.297028 |
| 9.968591 | 10.43301 | 9.401459 |
| 6.144566 | 6.687947 | 4.802762 |
| 5.198949 | 5.910692 | 5.928846 |
| 6.471769 | 6.701914 | 5.865836 |
| 5.666974 | 6.388876 |          |
| 4.759542 | 6.427183 | 5.830992 |
| 7.473496 | 7.806957 | 7.582159 |
| 6.49027  | 6.525913 |          |
|          |          | 6.153977 |
| 2.48839  |          |          |
| 4.888955 | 5.509559 | 4.765177 |
| 5.642767 | 6.323629 |          |
| 7.234573 | 6.726048 | 6.868959 |
| 10.59518 | 10.31525 | 10.51922 |
| 4.800672 | 5.289928 | 5.548302 |
| 9.381845 | 9.841719 | 9.55757  |

|          |          |          |
|----------|----------|----------|
| 10.85373 | 11.32709 | 11.4598  |
| 6.297326 | 7.108197 | 6.13365  |
| 8.047484 | 8.989109 | 7.943165 |
| 9.912572 | 10.30647 | 8.17848  |
| 9.956615 | 9.873458 | 9.424592 |
| 8.178058 | 8.946141 | 7.831045 |
|          | 8.246267 |          |
| 5.048875 |          |          |
|          | 6.477167 |          |
| 5.378528 | 6.544543 | 2.276071 |
| 7.115552 | 6.703785 | 6.777556 |
| 4.973569 | 6.261653 |          |
| 12.51023 | 12.56735 | 12.0357  |
| 6.883588 | 6.437802 | 5.767205 |
| 8.465017 | 9.26166  | 7.068847 |
|          |          | 5.555495 |
| 6.11658  | 6.190306 | 5.99094  |
| 8.621368 | 9.073052 | 7.890282 |
| 8.706841 | 9.376267 | 9.219737 |
| 5.760765 |          | 6.642535 |
| 7.974414 | 9.238526 | 7.406818 |
| 8.89323  | 9.16867  | 9.272747 |
| 8.546692 | 8.536798 | 7.561994 |
| 8.698581 | 8.520153 | 8.339087 |
| 5.38933  |          |          |
| 6.991214 | 7.770564 | 7.301426 |
| 6.433028 | 7.044447 | 4.381919 |
| 8.648514 | 9.86406  | 8.528851 |
|          |          | 4.772677 |
| 6.81628  | 5.842217 | 6.950827 |
| 6.696112 | 7.351488 | 7.335099 |
| 6.580851 | 7.214767 |          |
| 7.618308 | 8.302933 |          |
| 7.754304 | 7.312088 | 8.168147 |
| 11.12364 | 11.00553 | 11.65535 |
| 9.209456 | 9.281249 | 8.860748 |
| 9.043105 | 9.225238 | 8.180869 |
| 8.908494 | 8.972992 | 7.46106  |
|          |          | 5.836041 |

|          |          |          |
|----------|----------|----------|
| 6.196659 | 5.931967 | 7.136028 |
| 7.647934 | 7.988279 | 7.713007 |
| 5.222225 |          | 5.481713 |
| 7.385163 | 8.128945 | 7.247403 |
| 6.048176 | 5.558019 | 5.814647 |
| 7.801858 | 8.104095 | 7.265022 |
| 6.972087 | 7.398786 | 6.13731  |
| 4.110392 |          |          |
| 5.551072 | 6.202902 | 5.71352  |
| 7.913489 | 9.465779 | 6.422672 |
| 4.90631  | 5.933628 |          |
| 5.225537 | 6.939476 |          |
| 6.883477 | 7.191484 | 5.964646 |
|          | 6.14532  |          |
|          | 7.574588 | 5.621418 |
| 8.240797 | 8.840028 | 7.522704 |
| 5.575387 | 6.323343 | 6.308744 |
| 5.116322 |          |          |
| 7.682138 | 7.876513 | 6.855434 |
| 6.099513 |          |          |
| 4.052393 |          |          |
|          | 6.961896 |          |
| 7.20971  | 7.168818 | 6.974537 |
|          | 6.528664 | 5.946207 |
| 9.303033 | 9.327955 | 9.644234 |
| 9.670086 | 8.903493 | 10.10067 |
| 8.551295 | 8.515625 | 8.228664 |
| 5.940279 | 5.90935  | 6.520777 |
| 5.202816 |          |          |
|          |          | 4.178401 |
| 7.769307 | 8.186858 | 7.394698 |
| 5.533378 | 7.229699 |          |
| 8.860301 | 9.884077 | 7.726298 |
| 7.019928 | 7.092724 |          |
| 7.009135 | 6.603875 |          |
| 12.432   | 12.68664 | 12.59594 |



|          |          |          |
|----------|----------|----------|
| 9.253289 | 10.24341 | 9.134488 |
| 5.958761 | 7.252244 |          |
| 8.942948 | 10.1365  | 8.113967 |
| 9.478969 | 9.68932  | 8.632551 |
| 9.18256  | 9.390863 | 7.585047 |
| 8.956249 | 9.191263 | 8.433857 |
| 12.1723  | 12.23664 | 13.04768 |
| 4.593014 | 5.10285  | 5.277007 |
| 12.45755 | 12.63003 | 12.44031 |
| 10.08409 | 9.771689 | 10.09183 |
| 6.010609 | 6.941751 | 6.877869 |
|          | 5.290712 |          |
| 7.371974 | 7.380718 | 6.703595 |
| 7.401242 | 7.556798 | 7.57736  |
| 4.381911 | 5.004733 |          |
|          | 6.821447 | 5.26081  |
| 8.877697 | 8.968957 | 8.539545 |
|          | 6.180145 |          |
| 5.785975 | 5.10795  | 6.174962 |
| 7.25257  | 8.034452 | 5.669475 |
| 10.11065 | 9.899218 | 10.56582 |
| 8.448205 | 8.478748 | 8.964211 |
| 6.475593 | 6.481719 | 7.001339 |
|          |          | 6.004942 |
| 6.311383 | 6.282595 | 6.483089 |
| 6.945554 | 5.919115 | 5.792088 |
| 8.222327 | 8.059163 | 7.323948 |
| 4.948776 |          | 5.121583 |
| 5.858506 |          |          |
|          | 6.61254  | 7.249605 |
| 7.932055 | 7.616435 | 7.77728  |
| 4.412528 |          |          |
| 4.38069  |          |          |
| 6.460127 | 6.492281 |          |
| 7.87119  | 8.795135 | 7.287171 |
| 9.789896 | 10.71895 | 8.488123 |
| 6.808924 | 6.326324 | 5.711464 |
|          |          | 6.337455 |
| 7.048573 | 7.284885 | 7.752667 |
| 4.828964 | 5.688114 |          |

|          |          |          |
|----------|----------|----------|
| 3.376541 | 6.882909 | 6.660839 |
| 7.299618 | 7.521234 | 6.458369 |
| 4.121458 |          |          |
| 7.50201  | 7.893241 | 7.33028  |
| 5.441731 | 6.192222 |          |
| 5.98719  | 6.53942  | 6.11982  |
| 4.746264 |          |          |
|          | 5.09583  | 3.585956 |
| 5.967376 | 6.772087 | 6.380545 |
| 5.856891 | 5.323077 |          |
| 7.802619 | 6.460843 | 7.761699 |
| 6.555847 | 7.671165 |          |
| 6.443698 | 7.300721 | 5.678964 |
|          | 4.137928 |          |
| 7.177566 | 6.842146 |          |
| 9.134703 | 9.999336 | 9.967226 |
| 7.61521  | 8.371369 | 6.479178 |
| 6.176528 | 5.934904 | 6.931206 |
| 8.88326  | 9.195407 | 8.672543 |
| 7.647141 | 8.952005 | 7.816732 |
| 7.365291 | 7.343419 | 5.671048 |
| 5.826123 | 6.498451 | 5.523222 |
| 8.746638 | 8.872825 | 8.147952 |
|          |          |          |
| 8.460428 | 9.287815 | 8.198903 |
| 8.746714 | 9.110567 | 8.354016 |
| 13.05257 | 12.52773 | 13.25863 |
| 6.736346 | 6.890059 | 6.287819 |
|          |          | 6.460856 |
| 7.460322 | 8.22698  | 6.835968 |
| 6.504529 | 7.335296 | 6.89434  |
| 10.21223 | 10.2648  | 9.986677 |
| 7.050412 |          | 4.968963 |
| 9.136946 | 9.372019 | 8.782177 |
| 9.992736 | 10.75604 | 8.843282 |
|          | 5.713748 | 5.989592 |
| 8.406709 | 9.291815 | 8.388002 |
| 7.89744  | 8.630304 | 7.018559 |
|          |          |          |
| 11.09088 | 11.14069 | 11.67432 |

|          |          |          |
|----------|----------|----------|
| 7.450297 | 8.090934 | 7.471217 |
| 7.713232 | 8.039406 |          |
| 8.395165 | 7.374839 | 7.542047 |
| 7.05931  | 6.444696 | 6.887803 |
| 9.299308 | 9.359708 | 8.456397 |
| 7.736978 | 7.727177 | 8.614419 |
|          |          | 4.626736 |
| 9.728925 | 9.899626 | 9.648149 |
| 6.510598 | 5.982385 |          |
|          | 5.503146 |          |
|          | 5.890882 |          |
| 8.552595 | 8.731545 | 8.113134 |
|          | 5.573035 |          |
| 6.558851 | 6.032854 | 6.084556 |
| 6.724887 | 5.967892 | 6.964962 |
| 7.387253 | 6.642796 | 7.154604 |
| 9.740994 | 9.980957 | 10.19382 |
|          | 8.620667 |          |
| 7.760892 | 8.182684 | 7.349728 |
| 7.736633 | 8.080794 | 7.383942 |
|          | 6.895684 | 5.856061 |
| 9.781898 | 10.33726 | 9.556022 |
| 5.40034  | 6.804256 | 5.889818 |
| 10.14709 | 9.347384 | 10.04271 |
| 9.36066  | 9.577749 | 8.546638 |
| 11.71271 | 11.8904  | 11.13792 |
| 8.390443 | 8.697744 | 8.126314 |
| 6.891152 | 7.202558 |          |
| 5.15866  |          |          |
| 8.245177 | 9.908619 | 7.022201 |
| 5.170971 |          |          |
| 7.215629 | 7.232836 | 6.637051 |
| 9.868783 | 9.793544 | 9.411973 |
| 3.764076 |          |          |
| 8.478115 | 8.764129 | 7.960857 |
| 5.049959 | 5.217086 | 6.126904 |
|          |          | 3.25711  |

|          |          |          |
|----------|----------|----------|
|          |          | 0.946102 |
| 10.77568 | 9.541908 | 10.89343 |
| 7.835149 | 8.566265 | 7.295059 |
| 6.797896 | 7.728806 |          |
| 11.95859 | 11.4667  | 12.51913 |
| 4.283604 | 3.575592 |          |
| 5.258089 | 5.871997 | 5.217838 |
| 8.678391 | 8.729422 | 8.410094 |
| 6.761248 | 5.945085 | 6.975926 |
| 8.512921 | 8.479196 | 7.989426 |
|          | 5.456454 | 5.37862  |
| 7.865617 | 8.501899 | 7.410351 |
|          | 1.907327 |          |
|          |          | 5.186981 |
| 6.649221 | 6.164733 | 6.90132  |
| 6.405881 | 7.42378  | 6.903031 |
| 8.620633 | 9.062511 | 8.157304 |
| 5.22991  |          |          |
| 5.451165 | 6.062228 | 5.868651 |
|          | 6.271351 |          |
| 9.06411  | 8.938929 | 9.07073  |
| 7.191671 | 7.87258  | 7.652036 |
|          | 5.369142 | 5.63288  |
| 5.765947 | 6.315775 | 4.812747 |
| 4.174779 |          |          |
| 6.419613 | 7.105599 |          |
| 7.449859 | 7.616506 | 6.746205 |
|          |          |          |
| 2.463413 | 5.606529 |          |
| 8.168135 | 8.717324 | 8.045378 |
| 6.643948 | 6.667909 |          |
| 7.332471 | 7.058129 | 6.367143 |
| 7.710568 | 7.581399 | 7.01351  |
| 11.27583 | 11.95178 | 10.75673 |
| 5.882889 | 5.740399 |          |
| 10.67658 | 10.23748 | 10.11991 |
| 7.168458 | 6.469004 | 7.616463 |
| 7.353694 | 7.811052 | 7.496936 |
| 6.923012 | 6.92554  | 6.370759 |
| 5.936847 |          |          |

|          |          |          |
|----------|----------|----------|
|          | 5.438115 | 4.949025 |
| 10.94775 | 10.94489 | 10.72091 |
| 6.050024 | 5.731247 |          |
| 3.90319  |          | 6.099646 |
|          | 6.795472 |          |
| 4.971473 | 5.707364 | 3.409511 |
| 7.703086 | 7.603458 | 6.837093 |
| 6.575837 | 7.14913  |          |
| 7.031298 | 7.531289 | 7.535624 |
|          | 3.849792 |          |
| 8.248061 | 8.621232 | 7.95344  |
| 5.947142 |          | 5.107903 |
| 5.153348 |          |          |
| 9.324114 | 8.569    | 9.64868  |
| 8.219925 | 8.19196  | 7.239778 |
| 8.751986 | 7.961801 | 8.880655 |
| 6.608015 | 7.646368 | 5.810411 |
| 8.237014 | 7.969574 | 7.149045 |
| 5.745408 | 5.943899 | 5.344838 |
| 5.492923 |          |          |
| 3.772904 |          |          |
| 6.601706 |          | 6.995295 |
| 6.403828 | 5.804134 | 6.200395 |
| 7.303077 | 6.272284 | 7.148589 |
|          | 8.146413 | 6.833149 |
| 6.287136 | 6.891361 | 5.864306 |
| 9.388881 | 9.947898 | 9.886341 |
|          | 5.794592 |          |
| 6.283534 | 6.610939 |          |
| 6.73125  | 6.705673 |          |
| 5.065727 | 5.703205 | 5.0571   |
| 6.698421 | 6.669605 | 5.907723 |
| 9.325517 | 9.785723 | 9.640682 |
|          | 1.189468 | 4.664409 |
| 6.563035 | 6.231431 | 6.858127 |
| 9.262798 | 9.399486 | 8.976019 |
| 7.421267 | 9.312442 | 6.743465 |
| 5.626062 | 7.038642 |          |
| 9.378911 | 9.577157 | 9.637255 |

|          |          |          |
|----------|----------|----------|
| 6.157215 | 6.983638 | 6.605289 |
| 5.935113 |          |          |
| 9.793809 | 9.676831 | 9.725073 |
| 5.36622  | 5.784816 |          |
|          | 3.453024 | 4.964009 |
| 7.143645 | 7.551165 | 7.173485 |
| 6.413899 | 7.434499 | 6.804567 |
|          |          | 4.414379 |
| 9.217128 | 9.007587 | 9.40411  |
| 5.487628 |          |          |
| 7.088799 | 7.497531 | 7.70221  |
| 9.09489  | 9.046186 | 8.932389 |
| 5.679327 | 6.818664 |          |
| 8.323259 | 8.4266   | 7.918193 |
| 10.14391 | 10.28899 | 9.341793 |
| 6.916132 | 6.916165 |          |
| 8.621274 | 8.943193 | 6.877533 |
| 9.796806 | 10.61834 | 9.080905 |
| 0.4742   | 5.876266 |          |
| 4.587224 | 5.921047 | 5.397876 |
|          | 5.992804 |          |
| 8.172425 | 8.704415 | 7.379947 |
| 6.449915 | 7.022251 | 6.071614 |
| 10.11252 | 9.771986 | 10.33426 |
| 8.768461 | 8.733696 | 7.387816 |
|          | 4.484346 |          |
| 7.075704 | 8.037581 | 6.763843 |
|          | 5.859751 | 6.535117 |
| 7.701572 | 8.515677 | 6.755217 |
| 4.837524 |          |          |
|          |          | 5.881104 |
|          | 5.216738 |          |
|          | 5.224008 |          |
|          |          | 2.081295 |
| 4.197196 |          |          |
| 8.687288 | 8.932116 | 8.832248 |
| 6.275909 | 6.801511 | 5.918009 |
| 6.39033  | 6.138184 | 6.272765 |
|          | 3.128009 | 5.971418 |
| 6.388428 | 5.567806 |          |

|          |          |          |
|----------|----------|----------|
| 6.796864 | 7.013193 | 6.144379 |
| 8.611972 | 9.658924 | 8.293906 |
| 8.528466 | 8.064751 | 8.245237 |
| 6.881972 | 6.930788 | 7.937563 |
| 7.719229 | 8.131587 | 6.671971 |
|          | 5.876475 |          |
| 9.36957  | 10.05912 | 10.02233 |
| 7.908781 | 8.708194 | 7.289139 |
| 7.91375  | 8.558172 | 7.779238 |
| 6.171599 | 7.590982 | 4.784402 |
| 4.879664 | 5.67065  | 7.199288 |
| 7.082153 | 8.322722 |          |
| 5.531066 | 5.06022  | 5.207361 |
| 5.964259 |          |          |
| 6.282579 | 5.979837 |          |
| 6.681111 | 6.701989 |          |
| 3.715287 |          |          |
| 6.800248 | 6.773841 |          |
| 7.192765 | 7.816084 | 7.389451 |
|          | 5.782605 |          |
| 9.365519 | 9.698222 | 9.879259 |
| 11.03446 | 11.43595 | 10.86656 |
| 12.06496 | 12.14208 | 11.64535 |
| 9.229864 | 8.897552 | 8.929249 |
| 5.906748 | 6.931111 |          |
| 9.276957 | 9.345129 | 9.049651 |
| 10.11396 | 10.37622 | 9.739836 |
| 3.247043 |          |          |
| 5.710939 | 6.121419 | 2.973335 |
| 10.54945 | 10.8039  | 9.209092 |
|          |          | 1.27719  |
|          | 5.531523 | 6.030105 |
| 7.021779 | 6.859319 | 7.314282 |
| 6.340427 |          |          |
| 0.842296 | 5.255649 |          |
| 5.594414 | 6.340524 | 6.341853 |
| 8.483002 | 9.27104  | 7.966045 |
| 8.572497 | 8.924647 | 8.651768 |
|          | 5.294588 |          |
|          |          | 5.17113  |

|          |          |          |
|----------|----------|----------|
| 10.09709 | 10.14415 | 10.30335 |
| 6.031956 |          | 4.840093 |
| 7.099191 | 5.989037 | 6.804339 |
| 7.942141 | 8.510344 | 8.001953 |
| 5.945178 | 6.571132 |          |
| 9.96904  | 10.00524 | 9.961268 |
| 5.689474 |          |          |
|          | 4.481707 | 5.888121 |
|          | 8.135619 |          |
| 9.13139  | 9.01351  | 8.797567 |
| 8.56616  | 8.869554 | 7.683309 |
| 11.79394 | 11.51478 | 11.42844 |
| 5.402831 | 5.509517 |          |
| 6.095283 | 5.92582  | 6.615636 |
| 6.25744  |          | 1.933357 |
| 5.025138 |          | 5.808148 |
| 6.372191 | 5.555205 | 5.460573 |
| 6.077615 | 5.762322 | 5.30291  |
| 7.731429 | 7.923645 |          |
| 11.2782  | 12.33478 | 10.17614 |
| 3.705357 |          |          |
| 9.487722 | 10.69476 | 7.995651 |
| 9.962797 | 11.61552 | 9.502481 |
|          | 6.86144  |          |
| 4.753872 |          | 6.070971 |
| 6.087956 |          |          |
|          |          | 5.191687 |
| 6.162123 | 8.586254 | 7.310382 |
| 4.608304 | 5.587265 |          |
| 9.423737 | 8.954102 | 9.241475 |
| 9.411419 | 8.904882 | 9.393334 |
| 7.317093 | 8.077135 | 6.947472 |
| 10.0586  | 9.552788 | 10.05347 |
| 6.767809 | 4.384553 | 6.922856 |
| 5.951592 | 5.948746 | 5.071685 |
| 8.553801 | 9.28909  | 7.61705  |



|          |          |          |
|----------|----------|----------|
| 10.07394 | 10.72095 | 8.211577 |
|          | 5.778777 | 4.320301 |
| 8.05142  | 8.782127 | 8.256314 |
| 7.574818 | 7.657404 | 7.527706 |
| 9.506617 | 9.932105 | 9.663568 |
|          |          |          |
| 7.65503  | 8.38923  | 7.509845 |
| 11.56198 | 11.67888 | 11.85031 |
| 5.803385 | 6.18723  | 5.928962 |
| 5.719924 | 6.413201 | 4.713399 |
| 9.266217 | 8.539278 | 9.180437 |
| 6.893833 |          | 6.773018 |
| 9.747934 | 9.98076  | 9.099885 |
| 5.625951 |          |          |
|          | 5.472626 | 4.865398 |
| 8.417849 | 9.396282 | 6.859091 |
| 6.033956 |          | 5.468732 |
| 6.760656 | 6.717507 |          |
| 4.229658 | 5.8772   |          |
| 5.847357 | 6.252347 | 5.527181 |
| 8.85739  | 8.609202 | 8.282958 |
| 4.479633 | 5.813305 | 2.818488 |
| 10.65559 | 11.41854 | 9.580748 |
| 9.584821 | 9.452817 | 9.976834 |
| 8.946078 | 8.049224 | 8.525806 |
| 5.879928 | 6.16576  |          |
| 10.13415 | 10.53881 | 8.621438 |
| 7.760507 | 7.096614 | 7.572462 |
| 8.111129 | 8.533775 | 8.325508 |
|          | 6.620648 | 5.526952 |
| 7.295711 |          |          |
| 5.484869 | 6.070267 |          |
| 7.948637 | 7.273664 | 6.169388 |
| 6.516494 | 6.508499 |          |
| 6.153547 | 6.828747 | 7.161029 |
| 7.04089  | 7.807425 | 7.76286  |
|          |          | 2.902978 |
| 6.890806 | 7.020271 | 6.39472  |
| 7.722046 | 7.664386 | 7.648624 |
| 8.438869 | 8.581189 | 8.043707 |

|          |          |          |
|----------|----------|----------|
| 5.368184 |          |          |
|          | 1.755121 |          |
|          | 6.79457  |          |
|          | 5.124684 |          |
| 9.82321  | 10.77386 | 9.065479 |
| 4.63707  |          |          |
|          | 4.62045  |          |
| 8.028508 | 8.69434  | 7.649367 |
|          |          |          |
| 6.366166 |          | 6.867963 |
| 4.321375 | 6.57033  | 5.556269 |
| 5.54935  | 5.735457 |          |
| 7.502944 | 6.740611 | 7.829758 |
| 5.1862   |          |          |
|          | 0.960667 |          |
| 7.85912  | 7.904239 |          |
| 8.778418 |          |          |
| 9.16392  |          | 8.965503 |
| 7.051412 | 7.615945 |          |
|          |          |          |
| 8.483761 | 8.16411  | 8.790603 |
| 4.987765 | 5.691454 |          |
|          | 6.656154 |          |
| 5.8107   | 5.67191  |          |
|          |          |          |
|          | 4.768582 | 4.859409 |
| 7.763021 | 8.757718 | 7.181462 |
| 8.406635 | 8.178792 | 8.014625 |
| 10.60596 | 9.911394 | 10.1776  |
| 7.554607 | 7.340263 | 7.233495 |
|          |          | 6.791574 |
|          |          |          |
| 5.806578 | 7.029645 | 6.511324 |
|          | 5.058251 | 1.200355 |
| 9.108001 | 9.605062 | 8.677771 |
| 6.109357 | 6.594144 | 4.47764  |
| 6.82215  | 7.683144 | 7.786758 |
| 6.793778 | 8.470797 | 7.75001  |
| 4.363584 | 7.242573 | 6.98292  |

|          |          |          |
|----------|----------|----------|
|          | 4.967661 |          |
| 5.85753  | 6.181836 |          |
| 5.647722 | 6.322908 |          |
| 5.791544 | 6.354267 | 3.360196 |
|          | 2.46864  |          |
| 7.847106 | 7.362454 | 7.324145 |
| 8.123857 | 7.999041 | 7.990142 |
| 7.50233  | 8.168056 | 6.199372 |
| 11.73218 | 11.84306 | 11.97849 |
| 7.406169 | 7.551144 | 7.290025 |
|          | 4.415926 |          |
| 7.850883 | 8.790665 | 7.99375  |
| 5.831959 | 6.034307 | 6.300738 |
| 7.305834 | 8.488107 | 7.207257 |
| 6.234491 | 6.733765 | 7.109138 |
| 8.032895 | 8.139921 | 8.446134 |
| 7.34704  | 6.960555 | 5.390428 |
|          | 6.037688 |          |
| 8.398149 | 8.557693 | 7.404074 |
| 6.114304 | 5.812222 |          |
| 7.897388 | 8.880439 | 9.022882 |
| 8.952431 | 9.425467 | 9.940526 |
|          | 5.65688  |          |
| 9.055158 | 9.657999 | 8.42552  |
| 7.746859 | 8.364672 | 6.943407 |
| 7.130197 |          | 6.865124 |
| 11.25918 | 11.23914 | 10.96082 |
| 8.370877 | 8.45694  | 7.527313 |
| 7.022074 | 7.417543 |          |
| 9.39482  | 9.703258 | 8.985981 |
| 7.753103 | 8.790469 | 7.53227  |
| 10.23238 | 9.795633 | 10.7456  |
|          | 8.361398 |          |
| 7.099789 | 7.659358 |          |
| 6.811544 |          |          |
| 9.162667 | 9.446351 | 9.388218 |
|          |          | 5.20479  |
|          |          | 5.941337 |
| 5.612978 | 6.020205 | 6.00833  |
| 4.748994 |          |          |

|          |          |          |
|----------|----------|----------|
| 9.523277 | 9.783544 | 7.91085  |
| 7.750541 | 8.135599 | 7.277568 |
| 9.465433 | 9.492597 | 7.387335 |
| 6.842048 | 8.059774 | 6.87028  |
| 1.977339 |          |          |
| 8.99933  | 9.415132 | 7.947843 |
| 9.344495 | 10.19216 | 8.344124 |
|          | 7.035627 |          |
| 8.876522 | 9.026758 | 8.624654 |
|          |          | 5.282779 |
| 7.194087 | 7.245042 | 5.320815 |
|          | 8.180587 | 6.406134 |
|          | 6.894929 | 6.324171 |
| 12.74749 | 13.52062 | 12.231   |
| 6.626007 | 7.587714 |          |
|          |          |          |
| 7.101507 | 7.399832 | 6.56739  |
|          |          | 6.590342 |
| 6.480985 | 7.477675 |          |
| 5.324823 | 5.32789  |          |
| 5.658616 | 6.020402 | 7.190003 |
| 7.256806 | 7.139919 | 6.22762  |
| 7.562655 | 8.015448 | 7.49455  |
| 5.017214 | 5.798951 | 1.160664 |
| 9.631127 | 9.654061 | 8.790671 |
| 8.112661 | 8.682171 | 7.484497 |
| 10.14411 | 10.21573 | 9.676454 |
| 8.318361 | 8.377581 | 7.914455 |
| 6.320281 | 5.967907 | 6.109973 |
| 5.584016 | 6.82823  | 6.067059 |
|          |          | 6.858628 |
| 6.172901 | 5.744277 | 6.313332 |
| 9.256239 | 9.102335 | 8.734059 |
|          |          |          |
|          |          |          |
| 5.674733 |          |          |
| 7.991794 | 8.399654 | 8.532529 |
| 6.605385 | 5.409844 | 6.651159 |
| 7.605071 | 7.539338 | 6.780309 |
| 10.93142 | 11.14132 | 10.43996 |

|          |          |          |
|----------|----------|----------|
| 8.056791 | 8.314317 | 7.040042 |
| 7.228611 | 7.246404 | 7.929998 |
| 5.498893 | 6.869681 |          |
| 3.110482 |          |          |
| 6.294959 | 6.553821 | 6.319732 |
|          |          |          |
| 4.217388 |          | 5.716525 |
| 5.625461 | 6.200944 | 6.47108  |
| 9.420233 | 9.258148 | 9.133348 |
| 3.922848 | 6.593585 |          |
| 7.062889 | 8.582563 | 6.986305 |
| 5.32555  |          | 3.674785 |
|          |          | 5.189984 |
| 7.5368   |          | 7.119824 |
| 12.40215 | 12.93031 | 12.38475 |
| 7.125805 | 7.078235 | 7.530535 |
| 6.75678  | 6.521066 | 6.610621 |
| 7.763464 | 7.708979 | 5.85605  |
| 7.632944 | 7.970321 | 7.204422 |
| 8.252917 | 8.18672  |          |
| 12.51356 | 12.52118 | 12.50008 |
|          |          | 5.499022 |
| 9.210174 | 8.574037 | 8.93399  |
| 6.953204 |          | 6.763099 |
|          | 6.183717 | 6.868527 |
| 6.886921 | 7.505021 | 6.489839 |
| 7.224897 | 7.704441 | 7.301883 |
|          |          | 6.769149 |
| 5.092698 |          | 6.307961 |
| 5.546406 | 5.118177 |          |
|          | 7.592043 | 6.839789 |
| 9.974052 | 10.5267  | 9.869007 |
| 6.822766 | 6.519536 | 5.938814 |
|          |          | 6.487783 |
| 4.360956 | 5.737492 | 6.883905 |
| 5.676394 | 4.893824 |          |
| 5.839248 | 6.603897 | 6.961457 |
|          |          |          |
| 8.15447  | 8.714309 | 7.646782 |
| 7.25382  | 7.863948 | 7.126666 |

|          |          |          |
|----------|----------|----------|
| 5.523249 |          | 5.092428 |
| 4.29252  | 5.467792 | 4.245955 |
| 6.715092 | 6.988319 | 6.601273 |
| 10.39227 | 11.31422 | 10.78238 |
| 7.582565 | 7.854398 | 7.329909 |
| 5.227822 | 5.717353 | 5.702332 |
| 6.894357 | 7.081058 | 7.359373 |
| 10.6563  | 10.76055 | 10.75097 |
| 4.063255 | 4.825564 | 6.209291 |
| 5.814972 | 5.95016  | 6.736436 |
| 5.760958 | 5.535224 | 5.86853  |
| 10.47882 | 10.39478 | 9.65754  |
| 7.384381 | 7.206116 | 7.480056 |
| 6.295127 | 6.007471 | 5.47675  |
| 6.711769 | 6.527717 | 6.701737 |
| 12.05281 | 12.97024 | 10.61426 |
| 6.697208 | 6.670065 | 6.877018 |
| 8.392876 | 8.230265 | 9.081565 |
| 6.069428 |          | 6.539288 |
|          | 6.782116 |          |
| 7.701801 | 7.665659 | 6.839423 |
| 6.300827 | 6.56352  |          |
| 6.31779  | 6.318899 | 6.507696 |
| 7.687949 | 7.513465 | 7.568998 |
| 10.87631 | 10.33514 | 10.66338 |
| 7.867536 | 7.666032 | 7.267549 |
| 8.090389 | 7.84172  | 6.517021 |
| 12.02356 | 12.01361 | 11.84505 |
| 7.500611 | 5.496055 | 7.775137 |
| 11.64972 | 11.74342 | 11.5213  |
| 8.262326 | 8.950049 | 8.448884 |
| 5.639261 | 5.738369 | 6.779423 |
| 4.738998 |          | 6.105154 |
| 8.690846 | 8.887558 | 8.739882 |
| 5.112259 | 6.233731 |          |
|          | 5.737344 | 4.509217 |
| 11.21621 | 10.74686 | 11.54596 |
| 6.916294 | 7.553221 | 7.08695  |
| 12.82398 | 12.91011 | 12.48436 |

|          |          |          |
|----------|----------|----------|
| 6.655636 | 6.460097 | 6.972313 |
|          | 9.672762 | 11.70716 |
| 8.985807 | 8.905517 | 8.201612 |
| 6.705045 | 7.089836 | 6.924743 |
| 6.836739 | 7.410673 | 7.344244 |
| 5.592701 | 6.274455 | 5.865827 |
| 10.4938  | 10.68974 | 10.18073 |
|          | 6.372491 |          |
| 6.984777 | 7.111366 |          |
|          |          | 4.366056 |
| 9.568126 | 9.368933 | 10.15215 |
| 7.768705 | 7.726228 | 7.361962 |
| 7.543847 | 8.125506 | 7.636264 |
| 6.185959 | 7.303088 | 6.490001 |
| 6.148726 | 6.403293 | 4.850959 |
| 6.385869 | 6.56323  | 6.863922 |
| 5.207599 | 6.018576 |          |
| 6.856741 |          | 6.533151 |
| 7.907331 | 6.455573 | 8.777659 |
| 4.71681  | 6.171804 |          |
| 9.33043  | 8.695858 | 10.45218 |
| 6.999677 | 6.909401 | 7.68352  |
| 4.099351 |          | 4.690256 |
| 8.137342 | 8.613515 | 7.837159 |
|          |          | 1.529518 |
| 3.481283 |          |          |
| 8.415336 | 8.641629 | 8.700431 |
| 10.13335 | 10.94807 | 9.561022 |
| 4.427788 |          | 5.153246 |
| 5.560058 | 5.863807 | 6.216777 |
| 8.602153 | 8.786597 | 7.145294 |
| 6.346317 | 7.782912 | 5.33773  |
| 6.858479 | 6.142959 | 6.780962 |
| 7.338098 | 7.309078 | 6.227941 |
|          | 7.626534 |          |
| 4.582308 | 6.316944 |          |
| 5.586078 | 6.003727 |          |
| 7.596231 | 8.331738 | 7.996294 |

|          |          |          |
|----------|----------|----------|
| 3.455354 |          |          |
|          |          | 5.922002 |
| 6.372337 | 7.039372 |          |
| 9.640358 | 10.26845 | 9.477379 |
| 7.96494  | 9.236772 | 6.836146 |
| 9.832451 | 10.56993 | 9.010366 |
| 12.7568  | 12.32348 | 13.28525 |
| 7.015225 | 7.32992  | 6.461367 |
| 7.222402 | 7.565373 | 7.048886 |
| 4.022358 |          | 5.786282 |
| 8.958989 | 9.269403 | 8.754453 |
|          | 4.928944 | 6.777893 |
| 7.998012 | 8.278193 | 7.622467 |
| 6.842444 | 7.846964 | 7.971294 |
|          |          | 5.777557 |
| 6.650098 | 7.164093 | 6.416996 |
| 6.66742  | 6.817886 | 6.957009 |
|          | 6.102277 |          |
| 8.317918 | 8.74691  | 7.351858 |
| 7.158257 | 7.458496 | 7.072268 |
| 4.737052 |          | 6.055469 |
| 6.737474 | 6.397649 | 7.142588 |
| 5.347889 |          |          |
| 6.257796 | 3.166311 | 6.620167 |
| 6.477181 | 6.326798 | 5.882282 |
| 7.239181 | 6.573668 | 6.421834 |
| 4.908823 | 5.333273 | 3.267221 |
| 7.090665 | 6.840475 | 6.784409 |
| 5.883549 | 6.433543 |          |
| 5.525111 | 6.100376 | 5.929421 |
| 8.873799 | 10.09256 | 8.550279 |
|          | 5.988466 | 6.383259 |
|          |          | 4.479703 |
|          | 4.603437 | 4.919149 |
| 7.81874  | 8.749485 | 6.421881 |
| 8.225047 | 8.275929 | 7.970972 |
| 10.92589 | 10.85953 | 10.43627 |



|          |          |          |
|----------|----------|----------|
| 7.428128 | 8.059135 | 7.719214 |
| 8.451472 | 8.119063 | 7.670379 |
| 6.381109 | 6.175102 | 6.589692 |
| 7.474116 | 7.872553 | 7.73133  |
| 6.501958 |          |          |
| 10.43163 | 10.73163 | 10.45827 |
| 10.40338 | 10.7093  | 10.33381 |
| 4.698179 |          |          |
| 6.65176  | 6.67951  | 6.247456 |
| 7.725162 | 8.156033 |          |
| 6.349237 |          |          |
| 8.522375 | 9.323366 | 7.735751 |
|          | 6.598723 |          |
| 6.203481 | 6.286703 | 5.552591 |
|          |          |          |
| 3.41432  |          |          |
| 4.929244 |          | 5.059174 |
|          | 5.996109 |          |
| 8.025474 | 6.692117 | 7.520765 |
| 6.92936  | 7.378312 |          |
|          |          | 5.088106 |
|          |          |          |
|          | 5.038469 | 0.875071 |
|          |          |          |
| 6.852324 | 7.155001 | 6.894874 |
|          | 7.178396 |          |
| 7.648758 | 7.228516 | 8.085443 |
| 6.792165 | 6.838845 | 7.064916 |
| 7.944078 | 7.230934 | 6.119126 |
| 7.518729 | 9.026475 | 8.647657 |
| 5.965324 | 6.340683 | 6.693892 |
| 8.784261 | 9.752391 | 8.927048 |
|          | 6.304921 | 5.93088  |
| 4.786024 |          | 5.473803 |
| 5.181035 |          | 2.438719 |
| 7.010671 |          | 6.998017 |
| 6.562008 | 6.679415 | 7.17852  |
| 4.675332 | 6.064722 | 6.01461  |
| 5.822641 |          |          |
| 9.493411 | 9.028023 | 9.725217 |

|          |          |          |
|----------|----------|----------|
| 7.628933 |          |          |
| 11.92174 | 11.82659 | 12.08997 |
|          | 2.895105 | 6.537111 |
| 5.429124 | 5.05818  |          |
|          | 1.202296 |          |
|          | 6.091641 |          |
| 8.727393 | 8.964196 | 9.292197 |
| 3.888799 | 5.342576 | 4.86216  |
|          |          | 6.399431 |
|          | 4.726584 |          |
| 6.807399 | 7.837123 | 6.588025 |
| 5.931884 | 6.28034  | 6.436875 |
| 6.600034 | 7.134993 | 7.157445 |
| 4.388075 |          |          |
| 5.492413 | 6.855115 |          |
| 6.647313 | 6.484935 | 6.694095 |
| 10.59277 | 10.7198  | 9.95052  |
|          |          | 6.083005 |
|          | 6.208055 |          |
| 7.861882 | 8.145654 | 8.220952 |
| 6.192203 | 6.85446  | 6.840685 |
|          | 5.257968 | 5.92694  |
| 8.605071 | 6.920523 | 7.32755  |
| 7.068224 | 7.685686 | 6.765116 |
| 5.534943 | 5.439527 |          |
| 9.401503 | 9.476927 | 9.1216   |
|          | 4.943528 | 5.328502 |
| 9.389796 | 8.814181 | 8.961108 |
| 7.753606 | 7.534802 | 7.1382   |
| 6.89321  | 8.021099 |          |
| 5.548233 | 5.382871 | 5.836922 |
| 4.581906 |          |          |
| 11.68808 | 11.37536 | 11.68751 |
| 8.819304 | 9.214068 | 8.750171 |
|          |          | 5.371429 |
| 5.401107 | 6.209871 | 6.361243 |
| 6.522757 | 7.3877   |          |
| 6.007311 | 6.540239 |          |
| 8.643895 | 8.913595 | 8.657031 |
| 6.330838 |          | 7.120132 |

|          |          |          |
|----------|----------|----------|
| 5.884848 | 5.781479 |          |
| 5.948293 |          |          |
| 10.19663 | 10.19355 | 9.88925  |
| 9.95265  | 9.924335 | 10.20938 |
| 8.908326 | 8.809691 | 8.917369 |
| 12.0462  | 11.72311 | 11.31421 |
| 11.88487 | 11.90371 | 11.21385 |
| 6.701589 |          | 5.653988 |
| 1.917799 | 6.115055 | 1.802324 |
| 7.249224 | 7.572459 | 6.962949 |
|          |          | 6.7061   |
| 8.227408 | 8.708307 | 7.359459 |
| 7.141001 | 7.807599 | 5.863859 |
| 7.882396 | 8.069007 |          |
| 6.601002 | 3.855944 | 6.613466 |
| 3.395112 | 6.263383 | 5.837725 |
| 9.790449 | 9.596334 | 9.69286  |
| 5.73825  | 4.917063 | 4.391897 |
| 4.387    | 5.954048 |          |
| 6.306528 |          |          |
| 4.915054 |          |          |
|          | 5.32544  |          |
| 5.404242 | 6.386729 |          |
|          | 7.194012 |          |
| 2.787841 | 1.304655 |          |
| 8.211331 | 7.923332 | 8.319559 |
|          | 4.717806 |          |
| 7.145739 | 7.434033 | 6.831161 |
| 5.632732 | 5.383594 | 6.416786 |
| 2.420208 | 6.012826 | 5.269553 |
| 5.80518  |          |          |
| 3.942405 |          |          |
| 5.570863 | 5.910425 |          |
|          | 5.592067 |          |
| 6.110385 | 6.371912 |          |
|          | 6.874591 |          |
| 4.079836 |          |          |
| 4.796428 | 5.644004 | 5.846146 |
| 0.234759 |          |          |
| 10.75607 | 10.41363 | 10.51298 |

|          |          |          |
|----------|----------|----------|
| 6.813882 | 5.9702   | 6.231718 |
|          | 5.036103 |          |
| 4.524091 |          |          |
|          | 5.408835 | 3.864862 |
| 4.584801 | 5.381904 |          |
| 7.953807 | 8.63455  | 7.789833 |
| 6.357111 | 8.32089  | 4.670262 |
| 6.003274 | 6.869696 |          |
| 6.926317 | 6.577461 |          |
| 1.827785 |          |          |
| 4.698192 | 6.824079 |          |
| 5.963278 |          | 6.938684 |
| 4.90687  |          | 5.48751  |
| 7.552792 | 7.311262 | 7.223978 |
| 6.956898 | 6.869122 | 7.462226 |
| 5.616288 |          |          |
| 6.384321 | 6.588976 | 6.674882 |
| 4.911338 | 5.667164 | 5.719303 |
| 10.66009 | 11.01739 | 10.45306 |
|          |          | 4.708181 |
|          |          | 6.111587 |
| 4.122172 | 6.663002 |          |
| 6.817257 | 6.918937 | 7.153067 |
|          | 6.376772 |          |
| 7.284455 | 8.675746 | 7.143409 |
| 7.889331 | 9.345328 | 8.545087 |
| 5.807789 |          |          |
| 9.214686 | 9.531881 | 8.709922 |
|          | 4.977247 |          |
| 6.30338  | 6.982538 |          |
| 6.422985 | 6.509115 | 6.477355 |
| 7.872439 | 6.806235 | 8.280088 |
| 5.944014 | 5.64186  | 6.068038 |
| 6.387143 | 5.787973 | 5.722065 |
| 6.618034 | 6.694886 | 7.726063 |
|          | 6.048343 |          |
| 6.240417 | 7.829345 | 6.579039 |
|          | 6.69643  | 4.030203 |
|          |          | 4.786902 |
|          |          | 5.712616 |

|          |          |          |
|----------|----------|----------|
|          | 5.964554 | 5.526971 |
| 5.081916 | 6.383693 | 6.407652 |
| 2.812783 | 5.206593 |          |
| 3.022724 |          |          |
| 11.42203 | 11.70978 | 11.6483  |
| 6.175268 | 6.600524 | 6.094324 |
| 10.10556 | 10.76394 | 9.511922 |
| 7.173271 | 7.552807 | 7.596013 |
| 6.015516 | 5.739179 | 6.469204 |
| 4.437042 |          |          |
|          |          | 5.462433 |
| 3.878724 | 6.292619 | 5.637851 |
|          | 4.275349 |          |
| 3.104886 |          |          |
| 6.793177 | 6.141304 |          |
| 6.307192 | 6.316719 | 6.216307 |
| 7.510589 | 8.55694  | 7.762434 |
| 7.06825  | 7.984901 |          |
|          |          |          |
| 7.818654 | 8.041227 | 7.441392 |
| 9.334189 | 8.916534 | 9.389995 |
| 4.925075 |          |          |
|          |          | 5.589324 |
| 5.650499 |          |          |
| 5.04598  |          |          |
| 4.90819  | 6.014432 |          |
| 6.789604 | 6.730203 | 7.33894  |
|          | 7.088958 |          |
| 8.727123 | 9.189331 | 8.625346 |
|          | 3.721189 | 5.798284 |
|          | 7.076649 |          |
| 11.72272 | 12.19007 | 11.10573 |
| 7.437043 | 7.390577 | 7.098003 |
| 9.098238 | 9.432079 | 9.682091 |
| 7.659054 | 8.011436 | 7.628714 |
| 7.584478 | 8.238565 | 7.915938 |
|          | 6.112779 | 5.481761 |
| 5.674686 | 6.390645 | 6.328198 |
| 7.072798 | 7.19806  |          |
| 7.618026 | 7.349695 | 7.95179  |

|          |          |          |
|----------|----------|----------|
| 6.310615 | 7.332783 | 6.214229 |
| 8.434669 | 8.578724 | 9.126457 |
| 8.74681  |          | 8.7653   |
| 5.970304 | 5.80877  |          |
| 12.25043 | 12.40148 | 11.88729 |
| 5.029353 | 5.425631 | 6.267867 |
| 9.054867 | 9.087187 | 9.039793 |
| 7.000906 | 7.529902 | 7.354068 |
| 6.563651 | 7.019866 |          |
| 6.858573 | 7.027687 | 7.428812 |
| 8.329299 | 7.958187 | 8.810005 |
| 5.308332 | 5.994123 | 5.950666 |
| 5.970631 | 5.916334 |          |
| 7.255119 | 7.163229 | 6.723644 |
| 9.603419 | 10.58505 | 9.134157 |
| 8.20162  | 9.34071  | 6.96869  |
| 11.60725 | 12.19986 | 11.32749 |
|          |          | 4.263578 |
|          | 5.89656  |          |
| 9.573034 | 8.885448 | 9.441402 |
|          | 5.744535 | 5.142421 |
|          |          | 6.328524 |
| 10.16887 | 9.586985 | 10.95008 |
| 7.188955 | 6.389766 | 7.487096 |
| 6.243141 | 7.271791 | 6.502758 |
| 7.952977 | 8.075869 | 7.429254 |
|          | 4.91306  |          |
| 2.574108 |          | 5.758819 |
| 2.547384 | 5.720797 |          |
|          | 2.593052 |          |
| 7.919662 | 8.26885  | 7.91471  |
| 4.813278 | 6.901569 | 6.2711   |
| 3.989994 | 4.952887 | 2.375509 |
| 9.405263 | 9.259547 | 8.831311 |
| 6.447318 | 6.568005 | 6.041779 |
| 9.144916 | 9.970132 | 9.167614 |
| 9.665388 | 9.977955 | 8.640759 |
| 6.274504 | 7.288333 |          |

|          |          |          |
|----------|----------|----------|
| 3.428372 | 6.014998 | 3.032061 |
|          | 2.730604 | 6.829965 |
| 4.264639 | 5.312609 |          |
| 5.360981 | 5.41922  | 4.994332 |
| 5.946628 |          | 5.638735 |
| 4.322483 | 5.80222  | 5.606688 |
|          |          | 5.945333 |
| 6.71064  | 6.629365 |          |
| 6.595654 | 6.749309 | 7.282641 |
| 5.20542  | 6.622281 | 6.048006 |
| 6.191285 | 6.854408 | 5.956165 |
| 5.985364 | 4.451677 |          |
| 5.477651 | 7.933637 | 6.670784 |
| 9.234977 | 10.1998  | 7.974803 |
| 5.665753 |          |          |
| 4.42393  |          |          |
| 7.904029 | 7.710689 |          |
| 6.633012 | 6.832768 |          |
| 8.715421 | 7.913575 | 8.07326  |
|          | 6.538916 | 5.588662 |
| 5.295283 | 6.050432 | 5.64134  |
| 7.682812 | 8.505388 | 7.620341 |
| 7.719027 | 7.734652 | 7.575647 |
| 5.584682 |          |          |
| 8.137301 | 8.327117 | 7.508717 |
|          |          | 6.009023 |
| 6.792979 | 7.052798 | 6.405812 |
|          | 5.802594 |          |
| 7.15362  | 8.166935 | 6.776337 |
| 9.751482 | 9.295563 | 9.294652 |
| 4.920686 |          |          |
| 8.527107 | 7.963272 | 7.905663 |
| 5.276721 | 5.400025 | 5.421288 |
|          | 6.057829 |          |
| 5.610928 | 5.792916 | 5.079598 |
|          |          | 2.551834 |
| 5.518873 | 5.023807 |          |
| 5.722369 | 6.510425 |          |
| 5.036636 | 6.025405 |          |

|          |          |          |
|----------|----------|----------|
| 5.859767 |          | 5.279659 |
| 6.434092 | 4.704363 | 7.323975 |
|          |          | 7.45927  |
| 7.91568  | 8.433451 | 7.279638 |
|          | 5.750078 | 6.125381 |
|          | 5.267311 | 6.154107 |
| 5.925638 | 7.223964 |          |
|          | 6.386372 |          |
|          |          | 6.304687 |
| 8.282928 | 8.178661 | 7.551788 |
| 6.797509 | 6.930786 | 6.536434 |
| 6.512812 | 7.192955 |          |
|          | 5.897899 | 6.471191 |
| 5.857275 | 5.644309 | 5.59609  |
| 5.391094 | 6.30851  |          |
| 6.909412 | 6.411147 | 7.363519 |
| 6.886015 | 5.51054  | 6.740182 |
| 7.133942 | 7.546335 | 6.540496 |
| 8.590739 | 8.703298 | 8.702038 |
| 3.944545 | 5.973007 | 5.762584 |
| 6.96479  | 7.133426 | 7.634558 |
|          |          | 4.873717 |
|          | 6.840639 |          |
|          | 6.451836 |          |
| 6.212523 | 6.692594 | 6.447887 |
| 6.08728  | 5.010618 | 6.789018 |
|          | 3.371347 |          |
| 7.007465 | 6.761646 | 6.77859  |
| 6.706379 | 6.214572 | 5.906656 |
| 8.427465 | 9.494966 | 8.990771 |
| 5.127772 |          |          |
| 7.100867 | 7.32983  | 6.685743 |
|          | 7.459725 |          |
| 7.982347 | 8.61128  | 6.404306 |
| 6.738439 | 7.60054  | 6.889066 |
| 7.253137 | 6.852298 | 6.344905 |
| 8.654199 | 9.121316 | 8.284555 |
| 7.727421 | 7.24931  | 8.132573 |
| 5.533259 | 4.026876 | 5.822528 |



|          |          |          |
|----------|----------|----------|
| 4.970563 | 5.309628 | 4.683791 |
| 6.547521 | 6.812671 | 7.035584 |
| 7.348608 | 7.831581 | 7.943363 |
| 6.5142   | 7.098914 |          |
| 7.619898 | 8.185456 | 6.676857 |
| 7.465392 | 7.129972 |          |
| 5.828477 | 6.257965 |          |
| 9.815107 | 9.6746   | 9.796463 |
| 5.784385 |          |          |
| 7.447785 | 8.313494 | 7.31769  |
|          |          | 5.198996 |
| 6.414333 | 6.002317 |          |
| 7.218084 | 7.685825 | 6.676509 |
|          | 5.637375 | 7.111079 |
|          | 7.34175  | 6.989267 |
| 7.832904 | 8.22902  | 7.84724  |
| 6.134996 | 6.63476  | 5.725531 |
| 8.411909 | 8.194109 | 7.752333 |
| 5.551498 |          | 6.788163 |
|          |          | 4.384523 |
| 7.677349 | 7.748792 | 7.725737 |
|          |          | 5.608946 |
| 6.008944 | 4.862734 |          |
| 9.026578 | 9.324937 | 8.859041 |
| 5.650994 |          |          |
| 1.76184  | 5.910621 | 6.191663 |
| 10.77377 | 11.22013 | 10.15376 |
| 7.763087 |          | 7.926978 |
| 6.730988 | 7.263777 |          |
|          |          | 5.72786  |
| 3.793248 |          |          |
| 6.802504 | 7.096251 | 5.480376 |
| 5.095523 | 6.289865 | 5.826884 |
| 4.118992 | 6.988425 |          |
| 6.953662 | 7.008812 | 6.94974  |
|          | 6.02561  |          |
| 4.567802 |          |          |
| 5.831845 |          |          |

|          |          |          |
|----------|----------|----------|
| 5.836423 | 6.193244 |          |
|          | 5.886491 |          |
| 5.696799 | 5.430039 | 5.948208 |
| 6.247388 |          |          |
| 6.840994 | 6.341879 | 7.381014 |
| 8.007383 | 8.874852 | 7.276321 |
| 4.272377 | 6.399231 | 5.725464 |
| 5.462319 | 6.160796 | 5.924605 |
| 3.646795 | 5.172391 |          |
| 7.76224  | 8.052222 | 7.831868 |
| 7.278114 | 7.280403 | 7.27944  |
| 6.064639 | 5.497439 | 6.512257 |
| 9.001404 | 8.248274 | 8.617193 |
|          |          |          |
| 7.476127 | 7.189631 | 7.343435 |
| 6.624849 |          |          |
| 7.322345 | 6.636454 | 7.4398   |
| 6.582435 | 6.495081 | 6.64714  |
| 6.298541 | 5.910201 | 6.545044 |
| 3.03528  |          |          |
| 6.648343 |          |          |
|          |          | 4.165912 |
| 6.61821  | 7.197283 | 7.529892 |
| 8.629221 | 9.12197  | 7.753811 |
| 5.994145 | 5.727149 | 6.812802 |
| 6.174269 |          | 6.069386 |
| 6.21519  |          | 6.839685 |
|          | 4.821905 | 6.394425 |
| 7.288236 | 6.545917 | 6.438379 |
|          | 5.430039 | 5.566816 |
|          | 5.368523 |          |
| 6.159135 | 6.115323 |          |
| 7.967778 | 6.918949 | 7.09676  |
| 6.541765 | 7.66156  |          |
|          | 2.086185 | 5.717378 |
| 6.456875 | 7.017328 | 7.250623 |
| 6.562655 | 7.152004 | 6.597885 |
| 5.226204 | 5.970506 | 6.162819 |
|          |          | 6.089337 |
| 6.890901 | 7.83241  | 6.355432 |

|          |          |          |
|----------|----------|----------|
| 7.644547 | 7.794924 | 6.593862 |
| 5.765527 | 5.636034 |          |
| 5.447907 | 5.931926 | 6.301547 |
| 3.384906 | 5.904217 | 6.347439 |
| 7.384881 | 7.462679 | 6.772256 |
| 6.68291  | 7.365894 | 7.218627 |
| 5.294302 |          |          |
| 9.505999 | 9.212731 | 9.93034  |
|          | 5.085773 |          |
| 6.040175 | 5.945324 | 6.657142 |
|          | 1.777629 |          |
| 6.930249 | 6.492131 |          |
| 6.108154 | 6.062104 |          |
| 7.239648 | 8.630575 | 7.799214 |
| 7.692898 | 8.935761 | 8.655552 |
| 6.706957 | 6.228694 | 1.280674 |
| 10.35649 | 10.54688 | 9.863673 |
| 5.394738 | 2.350845 | 6.504072 |
| 5.45239  |          | 3.758229 |
| 4.753598 | 3.766278 |          |
| 9.345477 | 9.032117 | 9.147923 |
| 8.349373 | 8.44128  | 8.482601 |
| 9.849406 | 9.320488 | 10.00354 |
| 8.075202 | 9.607953 | 7.961737 |
| 11.54155 | 11.60094 | 10.76932 |
|          |          | 2.893243 |
| 4.881516 |          |          |
| 2.173973 |          |          |
| 5.950277 | 6.603777 | 5.608204 |
| 6.351624 | 5.945973 | 6.960248 |
| 6.053322 | 6.457758 | 5.934631 |
| 6.775579 | 7.715092 |          |
| 3.692901 |          | 4.620292 |
|          | 6.32702  |          |
| 5.470506 |          |          |
| 6.238929 | 6.739635 | 6.621541 |
|          | 4.489996 |          |
| 9.266233 | 8.988644 | 8.290787 |
| 6.79738  | 7.203696 | 7.426466 |

|          |          |          |
|----------|----------|----------|
| 7.675479 | 7.88724  | 8.1087   |
| 5.321508 | 5.838953 | 6.04406  |
| 7.393539 | 7.846935 | 7.170573 |
| 5.324749 | 6.603954 | 6.004581 |
|          | 1.331743 |          |
| 6.23558  | 6.370694 | 5.990992 |
| 8.970514 | 9.210253 | 8.907605 |
| 7.035329 | 7.012495 | 6.504038 |
|          |          | 5.42947  |
| 7.069274 | 7.903621 | 6.965126 |
| 6.291526 | 6.845408 |          |
|          | 5.662681 | 6.869029 |
| 7.793972 | 7.930799 |          |
| 6.398313 | 6.945611 | 6.714239 |
| 5.911064 | 6.422943 | 6.353161 |
| 7.21608  | 7.57846  | 7.034599 |
| 7.554991 | 8.222013 | 7.988791 |
| 5.357733 | 6.261973 | 6.35559  |
| 6.386047 |          |          |
| 4.36363  |          | 5.598808 |
| 9.990831 | 9.885238 | 9.622968 |
| 3.961139 | 5.857245 | 6.421082 |
| 7.460249 | 7.475593 | 7.291191 |
| 7.314506 | 7.399925 | 7.029622 |
|          | 5.840909 |          |
| 4.883018 | 6.495219 |          |
| 7.875817 | 7.941575 | 7.485656 |
| 7.796187 | 7.788876 | 7.567592 |
| 6.001487 | 7.204635 |          |
|          | 5.977208 | 5.437476 |
| 8.66149  | 8.828677 | 8.48757  |
|          | 6.623721 | 7.573949 |
|          | 7.471255 |          |
|          | 6.639933 |          |
| 8.207733 | 8.430182 | 7.879001 |
| 8.42906  | 8.417093 | 7.552628 |
| 5.25812  |          | 5.838285 |
| 5.544458 |          | 5.849049 |
| 7.002365 | 7.69334  |          |

|          |          |          |
|----------|----------|----------|
| 7.631494 | 8.363966 | 7.099222 |
| 8.319226 | 8.689065 | 8.267641 |
| 1.265829 | 5.805966 | 6.032314 |
| 6.231663 |          |          |
| 6.425004 | 7.636425 |          |
| 10.03394 | 9.460233 | 9.149224 |
| 7.912756 | 8.548785 | 8.062254 |
| 6.286323 |          | 6.232274 |
| 0.792849 |          |          |
| 5.422066 |          | 5.234317 |
|          | 0.895457 |          |
| 7.907103 |          | 6.48938  |
| 7.217277 | 7.607416 | 6.365213 |
| 5.878306 | 6.359242 |          |
| 9.228203 | 7.201645 | 9.604248 |
| 5.94818  | 6.589102 | 5.173765 |
| 6.448647 | 6.958263 | 3.948562 |
| 7.415645 | 6.606511 |          |
| 5.107922 | 5.325212 |          |
| 8.009522 | 8.526977 | 7.542841 |
| 6.18547  | 7.519006 |          |
| 6.278212 | 6.740024 | 6.356624 |
| 5.389455 |          |          |
| 5.154707 | 6.601608 | 6.215148 |
| 5.060384 | 6.051256 |          |
| 9.414502 | 9.036828 | 10.21773 |
| 6.721356 | 6.927949 | 6.647879 |
| 8.182039 | 8.971402 | 8.207915 |
| 5.955444 | 6.820187 | 6.008859 |
| 6.886018 | 6.626765 |          |
| 12.82439 | 12.40288 | 12.64566 |
| 10.79456 | 10.04062 | 10.98339 |
| 10.62402 | 10.13372 | 10.95289 |
| 7.676607 | 8.908662 |          |
|          |          | 5.346482 |
| 2.088073 |          |          |
| 4.775955 | 5.94432  | 5.646486 |

|          |          |          |
|----------|----------|----------|
| 6.290419 |          |          |
|          | 3.203306 |          |
| 4.162414 | 4.423032 |          |
| 6.035457 | 7.085836 | 5.055246 |
| 3.463976 |          |          |
|          | 4.95841  | 5.614669 |
| 6.892779 | 5.877916 | 6.648491 |
|          |          | 4.527221 |
| 7.744762 | 8.035448 | 8.015268 |
| 7.790755 | 6.856287 | 6.661465 |
|          | 6.300957 |          |
|          | 5.452568 | 5.972341 |
|          |          | 5.676484 |
| 5.620411 |          |          |
| 7.108822 | 8.079004 | 7.274636 |
| 10.43468 | 10.94585 | 10.31163 |
| 5.061172 | 5.502672 | 4.736838 |
|          | 6.791081 | 6.525453 |
|          | 4.90278  | 5.897566 |
| 4.704182 |          |          |
| 7.185066 | 7.890132 |          |
| 9.772215 | 9.663242 | 10.21096 |
| 9.905522 | 10.52101 | 8.677894 |
| 5.616818 | 5.681448 | 6.483643 |
| 5.791203 |          |          |
|          | 7.21883  | 7.557074 |
| 7.21883  | 7.557074 | 7.620161 |
| 11.14298 | 11.42711 | 10.08548 |
| 10.34889 | 10.09378 | 8.993224 |
|          |          | 4.667778 |
| 9.306514 | 10.06793 | 9.406691 |
| 6.242196 | 6.621783 | 5.988483 |
|          | 5.03695  | 5.917707 |
|          |          | 6.776338 |
| 9.014565 | 10.01728 | 8.295514 |
| 8.108455 | 8.078348 | 8.048607 |
| 7.529143 |          |          |
| 9.727152 | 7.301922 |          |
|          | 5.800588 |          |
| 5.138529 |          |          |
| 7.723218 | 8.216602 | 7.21467  |

|          |          |          |
|----------|----------|----------|
| 6.945268 | 8.286874 | 5.016388 |
| 7.386751 | 7.893378 | 7.323213 |
| 6.013125 | 6.647983 |          |
| 9.199854 | 9.10531  | 8.834147 |
| 5.570591 |          |          |
| 4.431434 |          |          |
| 8.90249  | 8.507325 | 8.99582  |
| 6.148914 | 6.821018 | 5.610449 |
| 5.588982 | 6.634475 |          |
| 5.319024 | 7.462595 | 6.959769 |
| 5.224798 | 6.146695 | 5.651548 |
| 11.32798 | 10.81788 | 11.47348 |
| 6.197193 | 6.347455 |          |
| 6.4555   | 7.75136  |          |
| 5.713243 |          |          |
| 7.711796 | 8.458716 | 6.649096 |
|          |          | 4.86222  |
| 8.172082 | 9.425536 | 7.726054 |
| 9.421885 | 10.07465 |          |
| 2.51292  |          |          |
| 6.910324 | 7.157059 | 5.428162 |
| 6.654897 |          | 5.735895 |
|          | 7.777462 |          |
| 5.650261 | 6.801137 | 6.143827 |
|          |          | 1.579296 |
| 4.841792 | 5.73084  | 6.136321 |
|          | 4.97566  |          |
| 5.261521 | 5.804659 |          |
| 6.189619 | 6.440877 | 5.789766 |
| 6.126949 | 6.204088 | 6.620244 |
|          |          | 6.046064 |
| 5.787217 | 7.112775 |          |
|          | 4.482298 | 5.643629 |
| 8.660807 | 8.174405 | 8.230736 |
| 5.7195   | 6.107329 | 6.559996 |
| 7.759335 | 7.115178 | 7.733086 |
| 6.783555 | 7.097428 | 6.174289 |
| 8.467623 | 8.555616 | 8.057462 |
|          | 5.505567 | 1.502313 |

|          |          |          |
|----------|----------|----------|
|          | 5.237921 |          |
|          | 5.265521 | 5.813654 |
|          | 6.38838  | 6.623505 |
| 5.846793 | 5.633643 | 6.535076 |
|          | 5.440878 |          |
|          | 6.787124 |          |
| 6.537184 | 6.490267 | 6.104971 |
| 7.377431 | 7.201606 | 7.499306 |
| 5.49184  |          |          |
| 8.664421 | 8.750101 | 8.142381 |
|          |          | 1.88011  |
| 10.11439 | 10.47518 | 9.167619 |
| 6.681935 | 5.709633 | 6.821892 |
|          | 6.041247 |          |
| 5.783688 | 6.616926 | 5.18874  |
| 10.8035  | 11.67021 | 11.65116 |
| 9.029918 | 9.014987 | 9.782314 |
| 8.227263 | 7.578224 | 7.760994 |
|          | 5.174251 |          |
| 7.033873 | 7.475031 |          |
| 5.321549 |          |          |
| 6.371218 | 6.16411  | 6.206026 |
| 7.457795 | 7.971391 | 7.547215 |
| 7.944015 | 7.567346 | 8.029444 |
|          | 4.954074 |          |
| 5.932025 | 5.830651 |          |
| 8.192327 | 8.482678 | 7.841737 |
| 3.90268  |          |          |
| 6.741009 | 6.745286 | 5.391519 |
| 5.521802 |          | 6.283799 |
|          | 5.495507 |          |
| 8.901482 | 9.20303  | 8.389608 |
| 5.894045 |          |          |
| 8.866325 | 9.791177 | 7.966407 |
| 5.898791 | 7.131964 | 4.702714 |
|          |          | 5.680416 |
| 5.571648 | 5.818459 | 3.276636 |



|          |          |          |
|----------|----------|----------|
| 5.959755 |          | 5.943671 |
| 8.636618 | 8.639859 | 8.619926 |
| 7.546661 | 7.793203 | 7.863069 |
| 7.804223 | 8.294788 | 7.723421 |
| 8.195995 | 8.817876 | 7.706355 |
| 2.321534 | 6.036865 |          |
|          | 5.128391 |          |
|          | 5.447516 |          |
|          |          | 5.100372 |
| 5.266388 |          | 7.158783 |
|          | 4.06002  | 5.615675 |
|          | 5.721597 | 6.150116 |
| 5.923967 | 5.827777 | 5.912435 |
| 4.898598 | 5.002675 |          |
|          | 6.098614 |          |
|          |          | 4.264128 |
| 4.730323 |          |          |
|          | 3.86977  | 5.420458 |
| 5.570438 | 5.274133 | 5.817006 |
| 7.587053 | 8.415294 | 6.443132 |
| 6.398456 | 7.276912 | 6.116155 |
| 7.762127 | 7.366461 | 7.297343 |
| 8.948183 | 9.347583 | 7.856785 |
| 8.184591 | 7.947421 | 7.874796 |
| 7.235184 | 5.60034  | 7.346741 |
| 1.858412 |          |          |
|          |          | 3.432465 |
| 9.429704 | 9.214417 | 8.134071 |
| 8.374325 | 7.51896  | 9.324493 |
| 6.808954 | 6.938131 | 7.813492 |
| 6.196391 | 7.421516 | 6.482592 |
| 9.11993  | 9.908046 | 8.97114  |
|          |          | 1.040578 |
| 9.068363 | 9.857381 | 9.292546 |
|          |          | 5.404173 |
| 8.674252 | 8.681163 | 8.511404 |
| 6.978872 | 6.797823 | 6.479885 |
|          | 5.861809 |          |
| 8.488423 | 6.717515 | 7.361742 |

|          |          |          |
|----------|----------|----------|
| 8.889682 | 9.69806  | 8.867639 |
|          | 6.169725 |          |
| 11.8748  | 11.60133 | 11.50331 |
| 4.64789  | 5.386398 |          |
| 6.044614 | 6.509797 | 5.24851  |
| 8.000764 | 1.757455 | 7.686832 |
| 9.947306 | 10.22971 | 10.40202 |
| 7.859045 | 8.075334 | 7.633    |
|          | 6.045388 |          |
| 7.840334 | 8.499886 | 7.358944 |
| 5.705417 |          |          |
| 5.092289 |          | 5.716587 |
| 7.560882 | 7.353293 | 6.99468  |
| 5.328075 | 5.843891 | 5.405229 |
|          | 6.426533 |          |
|          | 5.064099 |          |
| 7.047214 |          |          |
| 7.179101 | 7.892868 | 7.440516 |
| 5.885326 | 6.223113 | 6.289924 |
| 8.380783 | 8.666943 | 7.550481 |
| 5.315173 | 6.097807 | 6.901861 |
| 7.264788 | 7.693073 | 7.000177 |
| 5.477088 |          |          |
| 6.563994 | 6.331469 | 7.311607 |
| 5.851311 | 5.553799 | 6.786275 |
| 6.091771 | 5.603207 | 4.278606 |
| 7.141563 | 7.516277 | 8.045445 |
|          | 6.668138 |          |
| 5.545759 | 5.558644 |          |
| 6.753908 | 6.812414 | 7.227823 |
| 8.88903  | 9.282284 | 8.427019 |
|          | 4.392114 |          |
| 6.248356 |          |          |
| 7.059368 |          |          |
| 5.85545  | 6.354211 |          |
| 8.727075 | 9.331056 | 8.053959 |
| 7.034837 | 7.759984 | 7.246418 |

|          |          |          |
|----------|----------|----------|
| 7.08078  | 7.549085 | 7.214819 |
|          | 6.556062 |          |
| 8.945866 | 8.526428 | 9.191822 |
| 8.202552 | 7.79073  | 7.844378 |
| 13.53276 | 12.91038 | 13.61843 |
| 9.095387 |          | 8.505143 |
| 10.95069 | 10.90498 | 10.58791 |
| 8.619761 | 9.562878 | 7.862503 |
| 9.538793 | 8.48455  | 9.187236 |
| 8.807933 | 9.272085 | 8.655314 |
| 10.79337 | 10.1976  | 10.08957 |
|          | 5.054864 |          |
| 1.288683 | 4.527809 |          |
| 8.418893 | 8.538367 | 8.416162 |
|          |          | 5.856033 |
| 9.763041 | 9.719903 | 8.949798 |
|          |          | 6.160872 |
| 6.145203 | 7.756434 | 5.947871 |
| 6.485101 | 7.36271  | 5.864624 |
| 6.768508 | 5.99644  | 6.357369 |
| 6.833573 | 7.017349 |          |
| 5.910722 | 6.589425 |          |
| 6.389177 | 6.229644 |          |
|          | 6.235922 |          |
|          |          | 7.691598 |
| 7.271495 | 7.628857 |          |
|          | 6.44798  |          |
| 6.440116 | 7.164121 | 6.809556 |
| 6.954293 | 6.783918 | 5.687494 |
| 5.867178 | 5.846865 |          |
|          | 4.421797 | 5.827867 |
| 6.159769 | 6.42201  |          |
| 4.881044 |          | 6.111895 |
| 6.780845 | 6.000224 | 6.725001 |
|          |          | 2.491851 |
| 7.588226 | 9.098006 | 6.954784 |
| 6.193886 |          |          |
|          | 5.843887 |          |
| 8.187374 | 7.55561  | 7.982322 |
| 5.670865 | 5.306611 | 5.679008 |

|          |          |          |
|----------|----------|----------|
| 5.526115 |          |          |
| 8.847088 | 9.424232 | 8.106678 |
| 7.108927 | 7.770487 | 7.385864 |
| 6.135282 |          | 5.682808 |
|          | 4.399765 |          |
| 2.067419 |          |          |
| 5.955779 | 5.450781 |          |
| 6.162464 | 5.6423   | 6.518158 |
| 8.81686  | 9.757903 | 8.167005 |
|          |          | 4.844628 |
| 6.191975 | 7.083617 | 6.382471 |
| 5.438068 | 6.931567 | 6.426509 |
| 5.620116 | 5.843093 | 6.821007 |
| 5.492206 | 5.419604 |          |
| 0.266557 |          |          |
|          | 5.434604 |          |
| 6.461931 | 7.045484 | 6.994841 |
| 8.955153 | 8.565667 | 8.511679 |
| 9.26032  | 9.056812 | 9.502295 |
| 2.763085 | 6.830246 | 7.179035 |
| 7.720882 | 8.424752 | 7.420035 |
| 8.446219 | 8.891218 | 7.966833 |
|          |          | 5.17983  |
| 7.509092 | 6.857441 | 7.562655 |
| 9.662016 | 10.13001 | 9.252537 |
| 9.057494 | 9.53344  | 8.614595 |
| 6.664198 | 7.053654 | 6.406558 |
| 7.385316 |          | 7.90595  |
|          | 4.92728  |          |
| 8.176571 | 8.460093 | 8.128268 |
| 6.758628 | 8.013958 | 5.797812 |
| 5.917833 | 5.771893 | 6.141905 |
| 5.947414 | 6.415022 | 5.627054 |
| 7.784839 | 7.151076 | 8.368575 |
| 8.38039  | 8.825935 | 8.78147  |
|          |          |          |
| 1.443086 | 5.236784 |          |
| 7.007627 | 7.65167  |          |
| 8.006931 | 8.50713  | 7.232138 |
| 7.210647 | 6.875082 | 6.688606 |

|          |          |          |
|----------|----------|----------|
| 8.456026 | 8.947605 | 8.042629 |
|          | 5.735463 |          |
|          |          | 4.676088 |
| 5.265358 | 5.957863 | 5.562411 |
|          |          | 3.906431 |
| 5.646304 |          |          |
| 5.390945 |          |          |
| 6.374761 | 5.351728 | 6.080481 |
|          | 7.447671 | 6.16977  |
| 1.498442 |          |          |
| 8.178002 | 8.421495 | 8.18404  |
| 6.387993 | 8.044388 |          |
| 6.727524 | 8.276374 | 6.790371 |
| 5.787594 | 5.149656 |          |
| 5.896743 | 6.776677 |          |
| 5.685117 | 5.55471  | 6.725791 |
|          | 4.517434 | 5.522998 |
| 6.008182 | 7.175917 | 7.336827 |
|          | 7.203589 | 6.511955 |
|          | 5.843705 | 2.120658 |
|          | 5.153538 |          |
|          | 6.22941  |          |
| 7.642877 | 8.138539 |          |
| 8.653737 | 9.335053 | 8.467513 |
| 5.041348 |          |          |
| 9.032807 | 9.235533 | 8.679761 |
| 8.437651 | 8.720808 | 8.364158 |
| 10.04924 | 10.34163 | 9.272806 |
|          |          | 5.47565  |
|          |          | 5.837928 |
| 6.395946 | 6.323261 | 6.568595 |
| 6.772183 | 7.238989 | 5.797265 |
| 7.193866 | 6.992264 | 6.872461 |
| 5.993942 | 4.926773 | 5.573893 |
| 6.635146 | 6.91604  | 6.608649 |
| 4.690606 |          | 4.168647 |

|          |          |          |
|----------|----------|----------|
| 7.329864 | 7.635962 |          |
|          | 7.887142 |          |
| 5.273932 | 5.273031 | 5.095807 |
|          | 2.114799 |          |
| 5.94237  | 6.181397 |          |
| 4.7082   | 6.065854 |          |
| 5.196636 |          | 5.439904 |
| 8.293044 | 8.36917  | 7.285823 |
| 7.705116 | 7.789015 | 6.63479  |
| 6.503176 | 6.229846 | 7.937158 |
| 9.13914  | 9.404386 | 9.008487 |
| 4.480173 |          |          |
| 8.071604 | 8.661942 |          |
| 7.426755 | 7.3469   |          |
| 8.792535 | 8.170409 | 8.964866 |
|          |          | 6.212723 |
| 6.698328 | 8.129725 | 6.940009 |
|          |          |          |
| 6.633473 | 7.595122 | 7.692452 |
|          | 6.732873 |          |
|          |          | 4.911455 |
|          | 4.229807 |          |
| 5.53406  | 7.25553  | 7.275357 |
| 6.181046 | 6.190166 | 6.500879 |
|          | 6.230159 | 5.560352 |
| 7.685207 | 8.28017  | 7.523799 |
| 8.298899 | 8.601998 | 7.661134 |
| 8.740171 | 9.409558 | 9.353278 |
|          |          |          |
| 6.287092 | 5.609554 | 6.786154 |
| 10.79822 | 10.86096 | 10.11935 |
| 5.987287 |          |          |
| 10.81402 | 10.86387 | 11.21792 |
| 8.191001 | 8.424554 | 8.025726 |
| 7.950045 | 7.701994 | 8.744012 |
| 5.229956 | 6.325982 | 6.555687 |
| 6.286672 | 5.747682 | 6.504974 |
| 9.075727 | 9.428859 | 8.252356 |
| 7.470226 |          |          |
| 5.659462 | 1.994871 | 5.701015 |

|          |          |          |
|----------|----------|----------|
| 6.88184  | 7.547535 |          |
| 6.007555 |          | 6.355998 |
|          | 7.461831 |          |
| 7.067248 | 6.432455 | 6.955585 |
| 6.042022 |          |          |
| 8.680714 | 9.783142 | 8.56109  |
|          |          | 2.79015  |
| 5.091742 | 6.753971 | 5.550521 |
| 4.816094 | 5.583828 | 5.963042 |
| 10.2335  | 10.25112 | 10.08235 |
| 5.7173   | 5.910385 |          |
| 9.448287 | 9.666723 | 8.733623 |
| 6.703143 | 7.25324  | 6.122528 |
| 10.96004 | 10.69639 | 10.87802 |
| 6.883007 | 7.091407 | 5.794854 |
| 5.218033 | 5.205861 | 6.076267 |
|          | 5.927708 |          |
|          |          | 5.65647  |
| 0.392736 |          |          |
| 9.127047 | 9.194469 | 8.534479 |
| 9.393641 | 10.12217 | 8.413313 |
| 9.818373 | 10.767   | 8.642287 |
|          | 7.078283 |          |
|          |          | 5.208685 |
| 7.331915 |          | 6.465541 |
| 6.290788 |          |          |
| 5.1113   |          |          |
| 4.10165  |          |          |
|          | 6.102142 |          |
| 6.895577 | 8.274336 |          |
| 9.515273 | 10.49433 | 9.425334 |

|          |          |          |
|----------|----------|----------|
| 7.445483 | 6.708562 | 7.161775 |
| 5.622459 |          | 5.860599 |
| 12.22912 | 12.4861  | 11.78388 |
| 2.335708 |          |          |
| 4.996865 |          | 5.55681  |
| 10.62062 | 10.65494 | 10.4677  |
| 8.376857 | 9.023699 | 7.916676 |
| 4.975306 | 5.267826 | 6.980058 |
|          |          | 0.05047  |
|          | 5.812035 |          |
|          | 7.971798 | 5.870255 |
| 4.859268 |          | 5.369158 |
| 5.265281 |          | 4.762239 |
| 4.213124 |          | 6.072271 |
|          | 4.169721 |          |
| 5.163653 | 5.633228 |          |
| 8.276185 | 8.785937 | 7.577259 |
|          | 6.443821 |          |
| 6.709521 | 6.772063 | 5.795171 |
|          |          | 5.453388 |
| 7.074295 | 5.971137 | 7.569881 |
| 7.569459 | 6.315858 | 8.237125 |
| 6.851445 | 6.282851 | 5.914419 |
|          | 5.896288 |          |
| 7.163997 | 6.995277 | 6.198218 |
| 5.215099 | 6.574075 |          |
| 6.883818 | 7.353144 | 6.992614 |
|          | 6.040716 |          |
|          |          | 5.839767 |
|          | 4.861655 |          |
| 7.225257 | 7.569346 | 7.679008 |
|          |          |          |
| 7.221241 | 7.138349 | 6.697037 |
| 6.453106 | 7.955985 | 6.273014 |
|          | 7.02337  |          |
|          | 6.173914 |          |
| 9.577462 | 9.54766  | 9.701177 |
| 8.706187 | 8.404848 | 8.382992 |
| 11.46305 | 10.76067 | 11.3085  |



|          |          |          |
|----------|----------|----------|
| 6.446735 | 7.038148 | 5.956957 |
| 9.215899 | 9.850085 | 8.589568 |
| 10.03102 | 10.09616 | 9.678562 |
|          | 6.282277 |          |
| 12.0931  | 12.72582 | 10.85214 |
|          | 3.361329 | 5.39507  |
| 7.439354 | 8.230124 | 7.909047 |
| 10.8356  | 10.96549 | 10.89182 |
| 5.917687 | 5.982876 |          |
| 7.471871 | 7.913405 | 6.341373 |
| 8.418533 | 8.737647 | 8.612176 |
| 5.692802 | 5.402384 |          |
| 5.36487  | 6.25958  |          |
| 6.514377 |          | 6.665863 |
| 13.3231  | 13.26743 | 13.74719 |
|          |          | 4.497894 |
| 4.163384 | 4.832892 |          |
| 5.707647 | 6.466081 | 5.983548 |
|          | 6.752636 | 5.735417 |
| 7.370976 | 8.030093 | 6.886352 |
| 10.12175 | 10.75605 | 8.957305 |
| 6.704942 | 7.360384 | 6.197786 |
| 6.098456 | 5.696986 | 6.386401 |
| 6.339634 |          |          |
| 7.771304 | 7.771303 | 7.469478 |
| 5.823812 | 5.152122 | 3.343182 |
| 6.684497 | 5.215426 |          |
|          | 6.296038 |          |
| 6.695047 | 7.404471 |          |
|          |          |          |
| 7.382913 | 7.289495 | 7.366048 |
|          |          |          |
| 6.913896 |          |          |
| 8.677042 | 8.710601 | 8.291606 |
| 4.67837  | 5.444518 | 5.972189 |
| 5.606549 | 5.601363 | 6.025045 |
|          | 4.863876 |          |
| 7.312191 | 6.959915 | 6.53365  |

|          |          |          |
|----------|----------|----------|
| 5.83173  | 5.799345 | 3.817913 |
| 11.76148 | 11.60321 | 12.27152 |
| 7.667728 | 8.209825 | 8.470008 |
| 8.799391 | 8.750633 | 8.600978 |
| 7.321547 | 8.368822 | 7.457684 |
|          | 4.889598 |          |
|          | 5.740286 |          |
| 5.901685 | 6.239313 |          |
| 5.384874 | 6.722595 | 6.288007 |
|          | 4.517262 |          |
| 10.12101 | 10.49064 | 10.19055 |
| 6.068957 |          | 5.872396 |
| 6.383485 |          | 5.188773 |
| 10.09629 | 9.419187 | 9.967428 |
| 7.805039 | 8.713334 | 7.312439 |
| 11.09465 | 10.25117 | 11.25494 |
|          | 5.521675 |          |
|          | 6.363227 | 6.438625 |
| 5.73813  |          |          |
| 6.310663 | 6.618591 | 6.447222 |
|          | 7.162299 | 6.167879 |
| 6.438212 | 7.83607  | 6.878124 |
|          |          | 4.838368 |
|          | 5.55121  | 4.914975 |
| 5.59476  |          |          |
|          | 6.214775 | 5.430038 |
| 6.579329 | 5.793789 | 6.876203 |
| 6.729269 | 6.275191 | 6.429431 |
| 7.61723  | 8.0882   | 7.237602 |
|          | 5.94992  | 6.301145 |
| 7.164791 | 5.876792 | 7.461855 |
|          | 6.144229 |          |
| 9.252675 | 9.376419 | 8.802997 |
| 9.171874 | 8.482872 | 9.058496 |
| 6.201302 | 7.761104 | 6.297494 |
| 6.51662  | 5.630121 | 6.405334 |

|          |          |          |
|----------|----------|----------|
| 6.642106 | 7.049051 | 7.093584 |
| 6.705303 | 8.091558 | 7.542607 |
| 5.851198 |          | 5.975062 |
| 5.852275 |          | 5.748427 |
| 7.782553 | 7.563797 | 7.165718 |
| 5.159526 | 5.542906 | 6.105405 |
|          |          | 6.461032 |
| 6.072894 | 6.804519 | 6.769096 |
|          |          | 5.789028 |
| 10.3165  | 10.38372 | 10.11695 |
| 7.016184 | 8.065394 | 7.856514 |
| 6.33196  | 6.619228 | 6.248458 |
|          | 5.294506 | 5.664448 |
| 6.639642 | 7.379712 | 7.354417 |
|          |          | 4.43757  |
| 8.051485 | 8.236885 | 8.035572 |
| 10.98214 | 10.79328 | 11.20904 |
| 11.82026 | 12.38814 | 12.14288 |
| 4.739958 | 5.544497 | 6.233759 |
| 4.723867 |          |          |
|          |          | 5.847522 |
|          |          | 3.981991 |
| 5.546771 |          |          |
| 4.57457  | 6.965727 |          |
| 8.136324 | 8.551039 | 7.390891 |
| 6.52165  | 7.712522 | 7.06063  |
| 8.514237 | 8.282398 | 7.807941 |
| 7.238963 | 8.568437 | 7.675654 |
| 8.080636 | 8.694243 | 6.918507 |
|          |          | 4.915506 |
| 7.339719 | 7.881003 | 8.520671 |
| 11.86435 | 11.49926 | 11.84106 |
| 6.184279 | 7.09003  |          |
| 9.148069 | 9.307455 | 9.47493  |
|          | 6.137869 |          |
| 3.718435 |          |          |
| 6.599431 | 7.092543 |          |

|          |          |          |
|----------|----------|----------|
| 6.869912 | 7.846801 | 7.232212 |
| 12.75035 | 12.99817 | 12.71487 |
| 9.192975 | 10.11698 | 8.065543 |
| 8.784276 | 10.04578 |          |
| 8.534307 | 7.592665 | 8.52313  |
|          |          | 4.077663 |
| 7.257196 |          |          |
| 6.927694 |          |          |
|          | 4.872916 |          |
|          | 5.098132 | 4.993609 |
|          | 4.449412 | 3.24748  |
|          | 6.428906 | 5.022829 |
|          | 4.529599 |          |
| 4.571346 |          |          |
| 8.198805 | 7.80656  | 7.952609 |
| 8.074249 | 8.132323 | 7.893488 |
|          |          | 6.117981 |
| 8.705872 | 8.840518 | 8.839462 |
|          | 5.68002  | 6.18379  |
| 5.94087  | 7.106571 | 6.413058 |
|          | 6.006751 | 5.825076 |
|          | 1.718952 | 5.366833 |
| 7.900795 | 8.213044 | 8.196642 |
| 3.245246 | 4.999429 |          |
| 9.750175 | 9.664233 | 9.355521 |
| 6.434729 | 8.001937 |          |
| 6.22311  | 6.301891 |          |
| 3.404673 | 6.447853 | 6.375567 |
| 9.572312 | 10.04772 | 8.778825 |
| 4.923609 | 4.707509 |          |
| 10.3335  | 10.17917 | 10.38649 |
| 11.28201 | 11.33028 | 11.49734 |
| 7.010389 | 6.974846 | 6.109677 |
| 5.477724 | 6.67233  |          |
| 4.159771 |          | 7.178258 |
| 10.17493 | 10.94561 | 10.01746 |

|          |          |          |
|----------|----------|----------|
| 9.037509 | 9.733018 | 8.11036  |
| 7.737556 | 8.252322 | 7.668042 |
|          |          | 5.917992 |
| 7.889265 | 8.335673 | 7.056569 |
| 9.155396 | 9.772161 | 9.454207 |
| 7.153729 | 6.920729 | 7.238791 |
| 5.814556 | 6.010516 |          |
| 6.93979  | 7.31214  | 7.364471 |
| 5.0846   |          |          |
| 2.661981 |          | 5.646942 |
|          |          | 6.694185 |
| 6.984572 | 8.168912 | 6.996392 |
| 7.406992 | 6.811855 | 7.30713  |
| 6.47013  | 6.123049 | 8.50247  |
| 6.819935 | 6.583485 | 3.426302 |
| 8.005141 | 7.934635 | 7.458911 |
|          | 5.490629 |          |
| 7.3424   | 6.937812 | 7.583012 |
| 11.14351 | 11.63272 | 10.43562 |
| 6.519284 | 7.300008 | 6.462142 |
| 6.461932 |          |          |
| 7.46776  | 8.074962 | 6.818463 |
| 11.51214 | 11.10288 | 11.08194 |
| 7.597148 | 8.00009  | 8.688388 |
|          | 4.746843 |          |
| 10.50753 | 11.27232 | 10.9226  |
| 7.412788 | 8.782196 | 6.944838 |
| 6.914765 | 7.315708 |          |
|          |          | 4.766871 |
| 4.589871 | 6.325466 | 5.989626 |
|          | 4.97527  |          |
| 7.207005 | 7.689092 |          |
| 10.30687 | 11.43028 | 9.754938 |
|          | 5.687121 |          |
|          | 5.37666  |          |
| 6.593682 | 6.873156 |          |
| 4.205508 | 5.509039 | 5.751352 |

|          |          |          |
|----------|----------|----------|
| 11.43693 | 10.94587 | 11.30017 |
|          |          | 6.768657 |
| 4.99632  | 6.178413 | 5.635451 |
| 6.303652 | 6.466687 | 7.02387  |
| 7.831073 | 6.143218 |          |
| 6.989604 | 6.339302 |          |
| 9.054643 |          | 8.737521 |
| 7.644474 | 8.556088 | 6.662532 |
| 4.437594 |          |          |
| 6.649289 | 6.529065 | 6.35492  |
| 5.333352 | 6.291083 | 6.350151 |
| 6.598468 | 5.678476 | 7.412033 |
|          | 6.141855 | 7.295251 |
| 5.654363 |          |          |
| 7.234386 | 7.320978 | 7.236677 |
| 9.331464 | 10.12152 | 7.974826 |
| 7.643649 | 8.083271 | 7.223181 |
| 6.186855 | 5.859417 |          |
| 3.817727 | 5.386684 | 4.83325  |
| 7.040424 | 6.170988 | 7.078673 |
| 7.618157 | 7.181468 | 8.660879 |
| 5.787258 | 6.613909 |          |
| 6.083364 | 6.137085 |          |
| 5.711843 | 3.511906 |          |
| 4.826696 |          |          |
| 8.725824 | 9.602919 | 8.55816  |
| 13.13936 | 13.39986 | 13.2782  |
| 12.2077  | 12.3399  | 12.07507 |
| 5.107852 | 6.316368 |          |
| 7.173835 | 7.137104 | 5.539141 |
|          | 4.059769 |          |
| 4.798316 | 6.281768 |          |
| 6.249251 |          |          |
| 7.500405 |          | 7.449802 |
| 6.13679  | 6.398708 | 6.513862 |
| 6.682942 | 7.242409 |          |
| 6.415854 | 7.359871 | 7.621082 |
| 4.698024 | 6.269269 | 5.979317 |
|          |          | 5.117422 |
| 6.263555 |          |          |

|          |          |          |
|----------|----------|----------|
| 8.554172 | 8.655704 | 7.828578 |
|          | 6.326424 |          |
| 6.345603 | 6.39585  | 6.674403 |
| 9.262731 | 8.568397 | 8.990866 |
| 7.963513 | 7.401339 | 8.284575 |
|          | 6.414974 |          |
| 4.829205 | 6.426668 | 6.192767 |
|          |          | 2.671369 |
| 7.553311 | 8.122119 |          |
|          | 6.671944 |          |
|          |          | 4.901983 |
| 8.715295 | 9.827693 | 8.895654 |
| 9.533875 | 9.969988 | 7.710614 |
| 6.180466 | 7.537456 |          |
|          | 5.896998 | 6.555743 |
| 6.130514 | 7.22486  | 5.465642 |
| 5.382662 | 4.947615 |          |
|          |          | 5.188627 |
| 5.785648 | 5.821605 | 5.645703 |
| 5.002868 | 4.677056 | 5.52033  |
| 11.52988 | 11.17969 | 10.77968 |
|          |          | 5.792442 |
| 6.395472 |          | 5.442065 |
| 10.74601 | 10.95713 | 10.60068 |
| 5.653599 | 5.894681 | 5.404042 |
| 6.302821 | 7.690421 | 6.162705 |
| 5.592444 |          |          |
| 6.649007 | 6.559784 |          |
| 7.217349 | 6.024894 | 8.019821 |
| 4.774242 | 5.093262 |          |
| 7.119636 | 7.041873 | 6.999798 |
| 5.708025 | 6.453963 | 5.65964  |
|          |          |          |
| 5.489883 | 5.986796 | 6.338448 |
| 4.767837 |          |          |
| 2.215758 |          |          |
| 5.477061 | 6.437297 | 6.468503 |
| 5.424062 | 5.805588 | 5.640402 |
| 9.2419   | 9.293354 | 10.07089 |
| 4.831912 | 6.405898 | 5.961879 |

|          |          |          |
|----------|----------|----------|
| 5.344367 | 6.17646  | 6.142713 |
| 5.952122 | 6.993429 |          |
| 8.768899 | 9.661927 | 7.213629 |
| 8.062014 | 9.306862 | 8.197994 |
| 7.709683 | 9.251502 | 7.254026 |
| 7.932496 | 8.734598 | 8.576534 |
| 5.590321 | 4.878989 |          |
| 6.488563 | 6.985067 | 6.1423   |
| 8.126474 | 8.241809 | 8.178816 |
|          | 4.352637 |          |
| 0.411414 |          |          |
| 6.011218 | 6.324194 |          |
| 6.947292 | 6.895277 |          |
| 6.924268 | 6.992072 | 5.808892 |
|          | 7.237159 |          |
| 8.411391 | 9.31993  | 7.63502  |
| 5.674981 | 5.960685 |          |
| 7.167464 | 7.436578 | 7.149421 |
| 7.11313  | 7.693391 | 6.700474 |
| 9.761377 | 9.550709 | 10.66785 |
| 9.562269 | 9.488277 | 9.590611 |
|          |          | 4.159612 |
| 7.873241 | 8.254268 | 6.903086 |
| 6.780585 | 7.643879 | 6.181    |
| 4.156899 |          |          |
|          |          | 2.795949 |
|          |          | 5.486876 |
| 5.46591  |          |          |
| 6.05832  | 7.928287 |          |
| 4.823264 | 5.286447 |          |
| 4.963239 | 6.304823 | 6.318296 |
| 6.642228 | 5.553357 | 6.923739 |
|          | 6.029676 |          |
| 5.978632 | 6.286824 |          |
|          | 6.367189 |          |
| 5.546253 | 5.857208 | 6.705602 |



|          |          |          |
|----------|----------|----------|
| 6.643848 | 7.800683 |          |
| 3.889255 |          |          |
|          | 4.915179 | 5.549276 |
| 5.631789 | 6.464297 | 5.820147 |
|          | 7.706348 | 6.741742 |
| 2.847145 |          |          |
| 10.91888 | 11.6276  | 9.644981 |
|          |          | 5.888989 |
| 4.782538 | 6.008398 |          |
| 7.596259 | 6.982052 | 7.548546 |
| 5.739631 | 6.09178  | 6.246096 |
|          | 2.149507 |          |
| 6.669207 | 6.969171 |          |
| 6.863912 | 6.934081 | 6.190309 |
| 7.900541 | 8.58894  | 7.917942 |
|          |          | 4.53996  |
| 7.09973  | 8.937766 | 6.814799 |
| 8.85741  | 10.16663 | 8.496955 |
| 9.018594 | 9.162757 | 8.309699 |
|          | 4.326311 |          |
| 8.281326 | 8.770796 | 8.433845 |
| 6.978043 | 5.997024 |          |
| 6.782186 | 6.340017 | 6.402812 |
| 5.980313 | 7.065726 | 7.461612 |
|          |          | 2.854282 |
| 6.144023 | 7.12896  | 6.725092 |
| 6.113657 | 5.918839 |          |
| 5.372042 | 5.89142  | 6.794585 |
| 5.324846 | 5.63669  |          |
|          | 8.102668 | 7.537554 |
| 5.780455 | 5.461227 |          |
|          | 5.613838 | 5.779904 |
|          | 6.799225 | 7.862276 |
| 5.667119 | 6.199165 | 5.841162 |
|          | 1.074747 | 5.370474 |
|          | 4.908014 | 5.977174 |
| 5.706564 | 5.875949 | 6.939536 |
| 5.500293 | 5.857318 | 5.34469  |
| 9.017415 | 8.835899 | 9.100819 |
| 7.373463 | 7.342536 | 5.647607 |

|          |          |          |
|----------|----------|----------|
| 6.302794 | 6.797033 | 6.795548 |
| 7.276079 | 7.558962 | 5.912664 |
| 4.721957 | 6.427078 | 6.333012 |
| 11.24985 | 10.16445 | 11.40039 |
|          | 5.628608 |          |
| 6.973965 | 3.912946 |          |
| 9.875211 | 9.759337 | 9.072075 |
| 8.662507 | 8.185581 | 9.041092 |
|          |          |          |
| 6.230037 | 6.467981 | 6.008017 |
| 3.164542 | 5.280917 | 6.122815 |
| 7.315134 | 7.159465 | 6.509419 |
|          | 7.869138 |          |
| 7.163997 | 6.60587  | 6.747542 |
| 8.428398 | 8.890918 | 9.091119 |
| 7.655088 | 6.397162 | 8.395597 |
| 5.991112 | 6.46681  | 5.278351 |
| 6.496083 | 5.989458 | 6.049781 |
| 8.677185 | 8.229872 | 8.499269 |
|          | 4.708776 |          |
|          |          | 4.798098 |
| 5.698099 | 7.135889 | 6.636297 |
| 7.224109 | 6.819002 | 6.888461 |
| 6.294567 | 7.956718 |          |
| 5.742895 | 4.779842 | 3.063444 |
| 3.798821 | 6.180178 | 5.248128 |
| 6.496514 | 6.249677 |          |
| 6.291565 | 6.12783  | 6.029442 |
| 6.732077 | 7.036636 | 6.634814 |
| 5.926851 | 5.62571  |          |
| 7.285995 | 6.760227 | 7.309126 |
| 5.910275 |          |          |
| 9.576297 | 9.295684 | 8.744249 |
| 5.809722 |          | 6.067228 |
| 6.525975 | 6.564713 | 6.987939 |
| 7.354893 | 8.039639 | 7.017477 |
| 5.539718 | 6.970391 | 5.58437  |
| 5.948623 | 7.698354 |          |
| 5.929321 | 7.701302 |          |
| 7.513805 | 7.911957 | 7.855544 |

|          |          |          |
|----------|----------|----------|
| 5.960036 |          |          |
|          | 5.004728 |          |
| 9.501849 | 10.21804 | 8.818811 |
| 7.554984 | 7.672534 | 6.960836 |
|          |          | 5.828915 |
| 10.8159  | 11.39602 | 10.90409 |
|          |          |          |
| 1.747719 | 5.096094 | 5.55152  |
| 5.663551 | 5.332385 | 5.624482 |
| 6.5619   |          | 7.187686 |
| 5.998114 | 5.345506 | 5.467081 |
| 6.289414 | 6.347986 | 6.140702 |
| 8.949722 | 7.831006 | 8.591056 |
| 5.857478 | 2.901811 | 6.292068 |
|          | 5.891231 | 5.596475 |
|          |          | 4.375314 |
| 5.76769  |          |          |
| 6.640971 | 6.08651  | 5.03085  |
| 3.595054 | 5.305384 | 6.389391 |
|          | 6.348903 |          |
| 5.760301 | 7.703863 | 6.039948 |
| 9.719298 | 10.07076 | 9.33499  |
| 5.721573 | 5.307185 | 5.427182 |
|          | 5.376063 |          |
| 5.542873 | 6.607553 |          |
| 7.500472 | 8.206874 | 7.204439 |
| 4.308731 | 4.535085 |          |
| 4.275824 | 5.114735 |          |
|          |          | 5.936635 |
| 4.11413  | 4.647039 |          |
| 5.923894 | 6.155614 | 5.658161 |
| 6.304546 |          | 6.226339 |
|          |          | 1.283744 |
| 11.52026 | 12.01779 | 10.7113  |
| 8.404135 | 7.927353 | 7.690402 |
| 11.66185 | 10.78944 | 11.26488 |
| 3.598011 | 5.024666 | 5.197782 |
| 7.639731 | 7.695503 | 8.263375 |
| 6.467177 | 7.54225  | 6.669176 |
| 4.710789 | 5.201039 | 6.080452 |

|          |          |          |
|----------|----------|----------|
| 5.466887 | 6.518669 | 6.142422 |
| 5.86146  | 6.701272 | 5.97995  |
| 6.053359 | 6.546514 | 5.692877 |
| 6.943034 | 7.633516 | 7.173384 |
| 5.574362 |          |          |
| 5.681727 | 6.258126 | 6.178839 |
| 6.78796  | 6.220423 | 7.174479 |
| 6.737376 | 6.692005 | 7.582136 |
|          | 3.452026 |          |
| 10.28624 | 10.45019 | 10.38104 |
| 7.307945 | 8.154221 |          |
| 6.978431 | 6.792473 | 6.744908 |
| 7.499197 |          | 7.456801 |
| 7.359818 | 7.243568 | 6.782114 |
| 7.619866 | 8.072246 | 6.407346 |
| 7.280267 | 6.781413 | 6.340803 |
|          | 6.474646 | 6.887315 |
| 8.914129 | 8.897666 | 8.550903 |
| 13.06907 | 13.32659 | 13.31924 |
| 6.714696 | 7.228517 | 6.922174 |
| 6.070015 | 5.620906 | 4.575016 |
| 7.446901 | 6.992198 | 8.416864 |
| 7.101536 | 6.173799 | 6.93575  |
| 4.516254 | 5.265206 | 6.187994 |
| 7.272964 | 7.687213 |          |
| 6.526279 | 7.179109 | 6.201163 |
|          | 2.777661 |          |
| 6.482377 | 7.968091 | 5.934212 |
| 5.593554 | 5.515875 |          |
|          | 1.76714  | 5.036292 |
| 8.526196 | 8.599466 | 7.92336  |
| 9.049148 | 10.09219 | 7.82367  |
| 3.337357 | 5.86923  |          |
| 7.878991 | 8.568225 | 7.392637 |
|          | 5.709301 | 5.067106 |
| 6.021369 | 7.16278  |          |
| 6.830871 | 7.781122 | 7.379914 |
| 4.438685 |          |          |

|          |          |          |
|----------|----------|----------|
| 5.13796  | 5.913741 | 4.883201 |
| 6.750583 | 7.40061  | 6.08873  |
| 5.930648 |          |          |
| 9.636749 | 10.03103 | 9.069784 |
| 12.24437 | 11.53714 | 12.12665 |
| 9.447087 | 8.632519 | 9.487063 |
| 5.442257 |          |          |
| 5.632881 |          |          |
| 6.755231 | 7.543378 | 5.496379 |
| 6.375999 |          | 6.641944 |
| 8.912056 | 8.946646 | 8.388762 |
| 4.937815 |          |          |
| 5.182347 |          |          |
| 8.228943 | 9.653464 | 6.999224 |
| 7.652226 | 7.749707 | 7.414813 |
| 5.81278  | 6.172517 |          |
|          | 6.4731   | 4.039961 |
| 4.039641 |          |          |
